# Supplementary material for: An Improved microRNA Annotation of the Canine Genome
Source: PubMed Central journal article supplement (PMC4847789; doi:10.1371/journal.pone.0153453), 2016-04-27

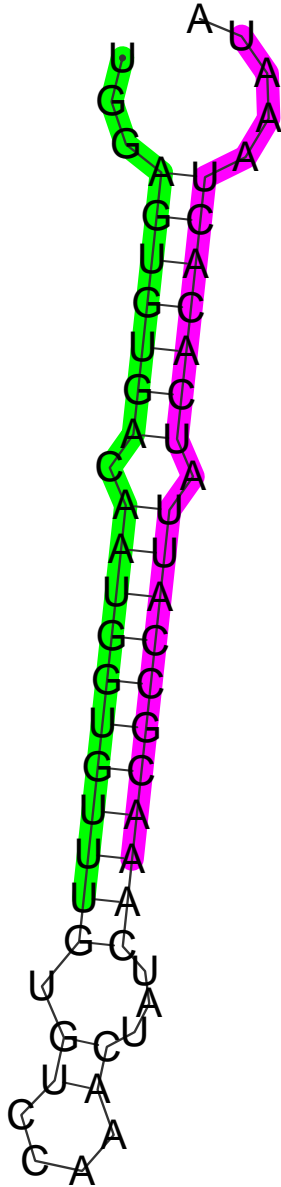

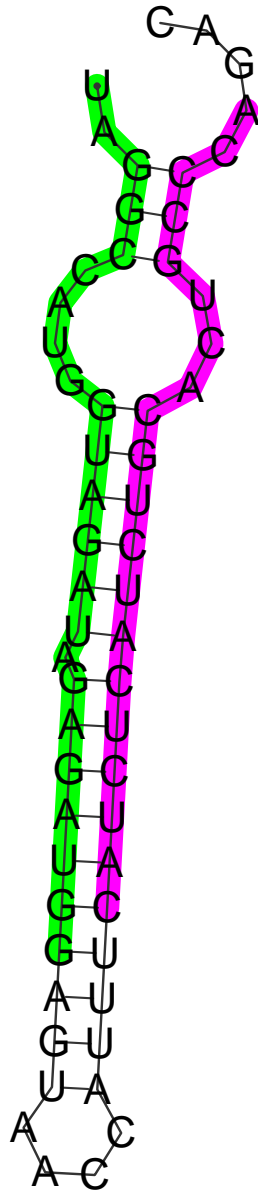

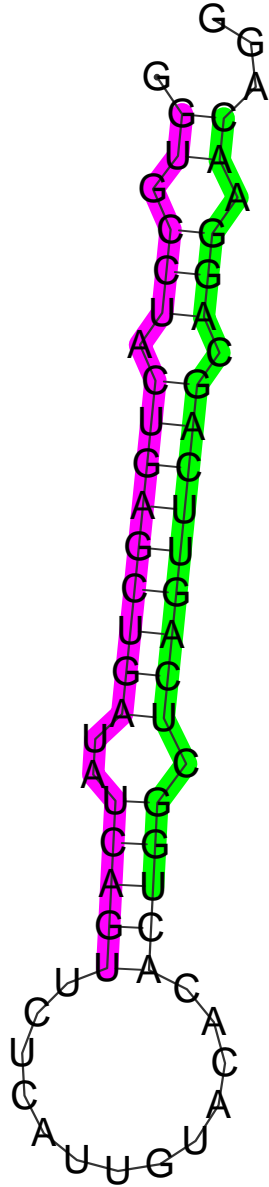

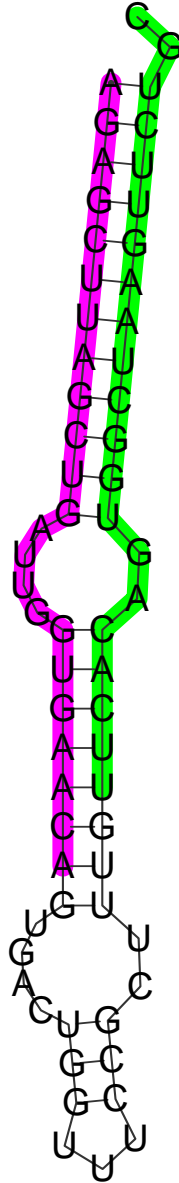



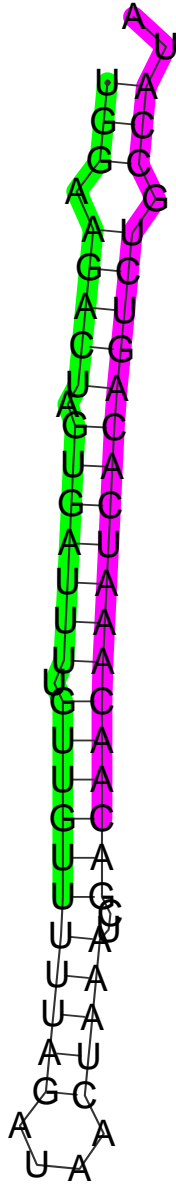



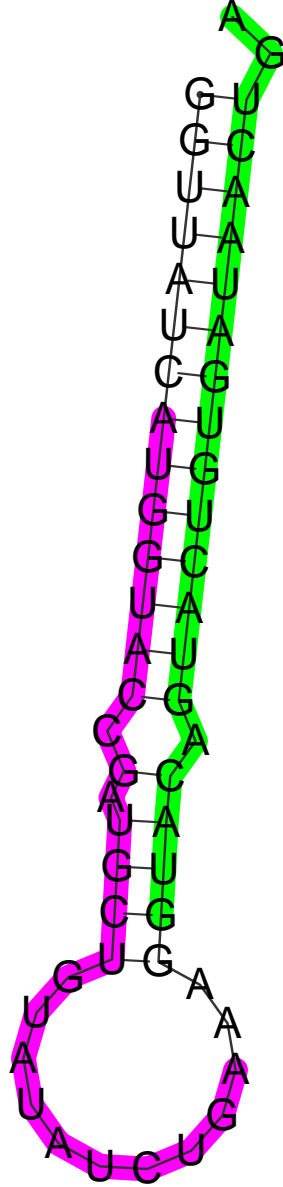



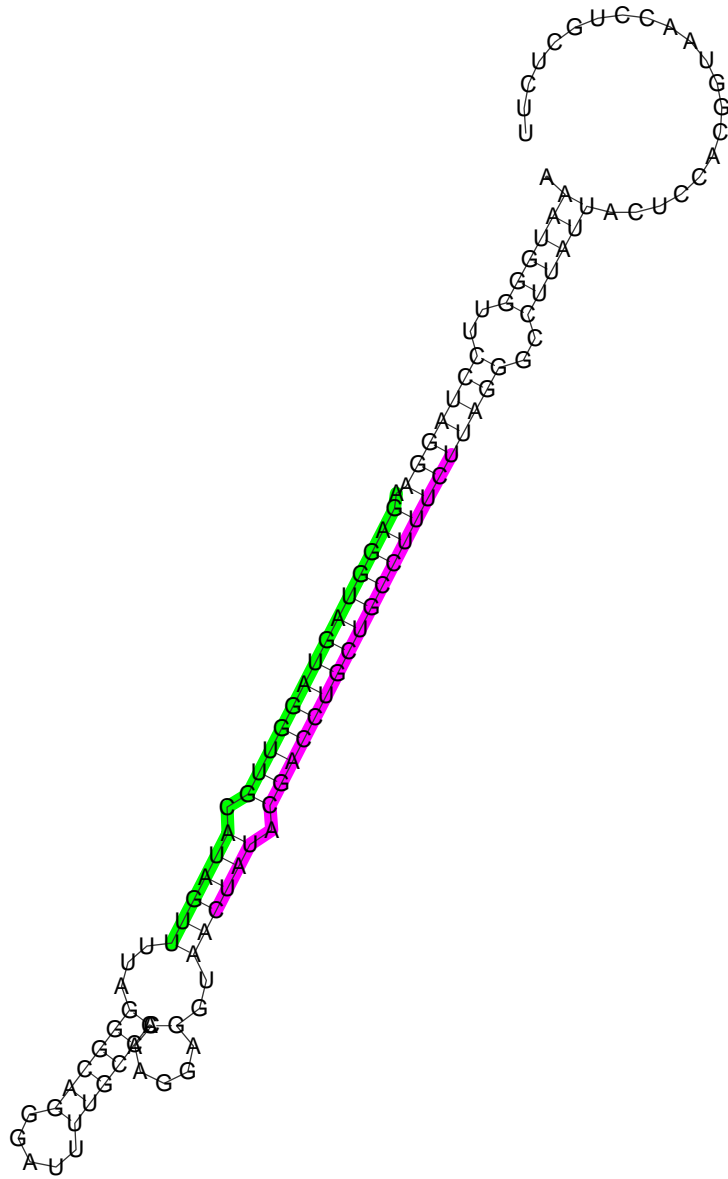



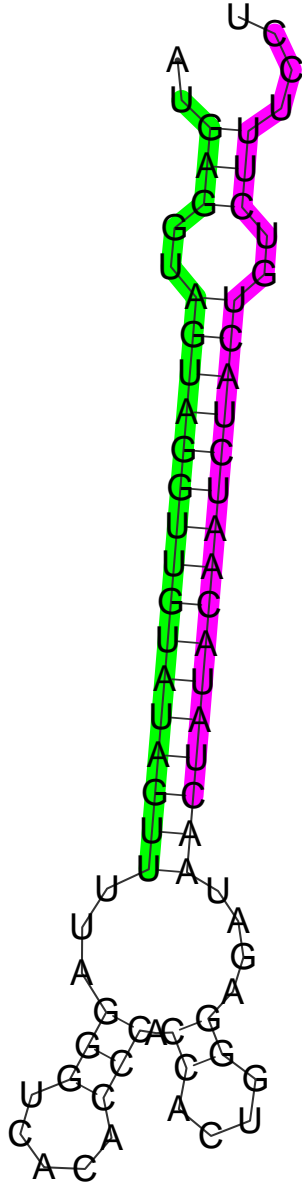

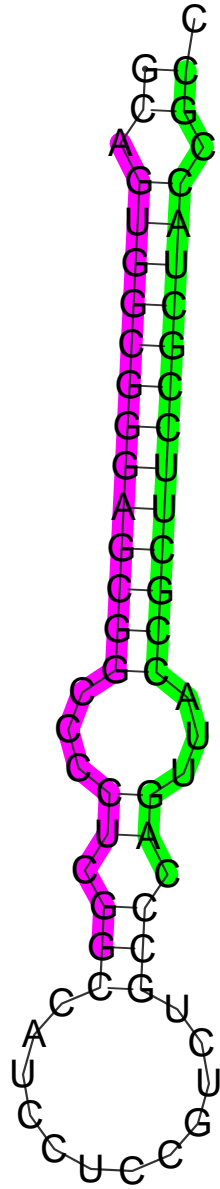

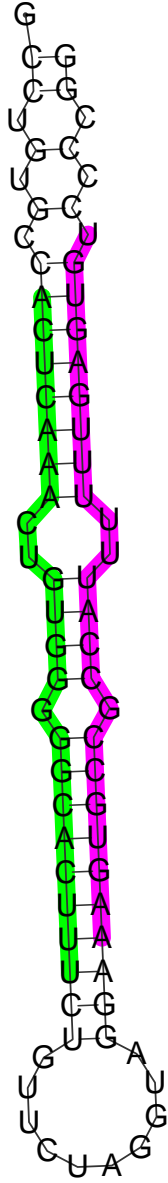

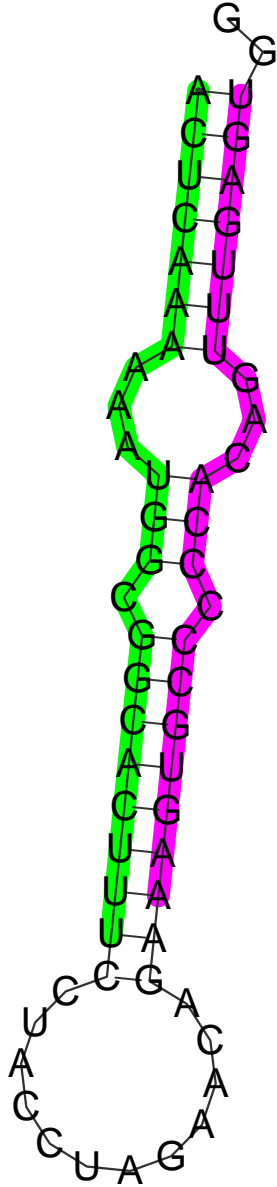



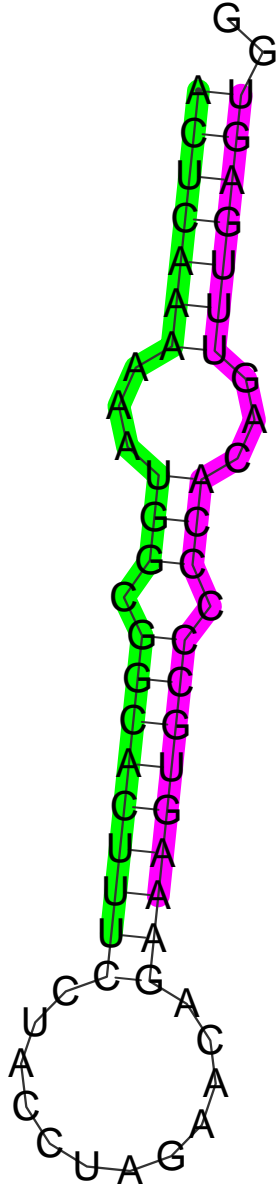



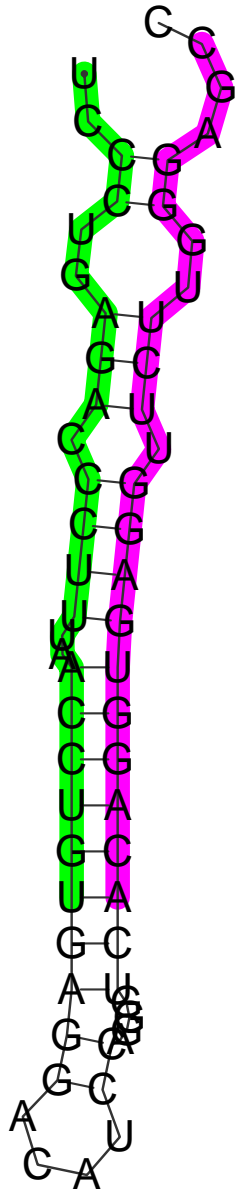

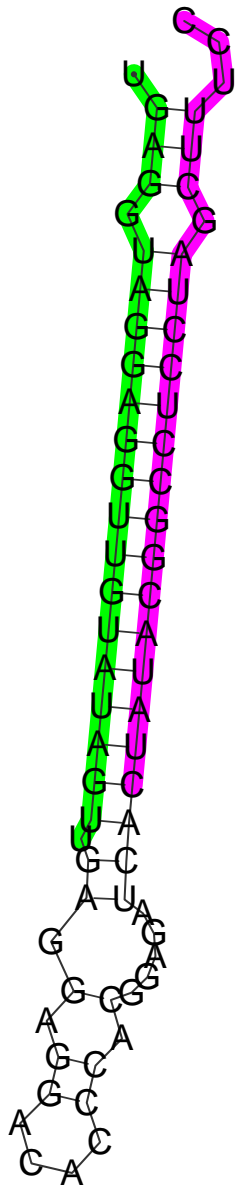



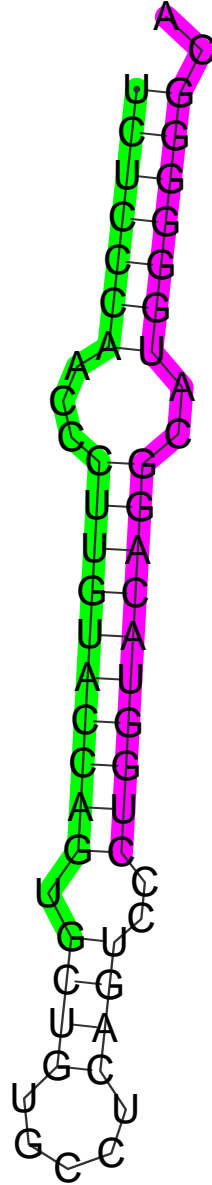

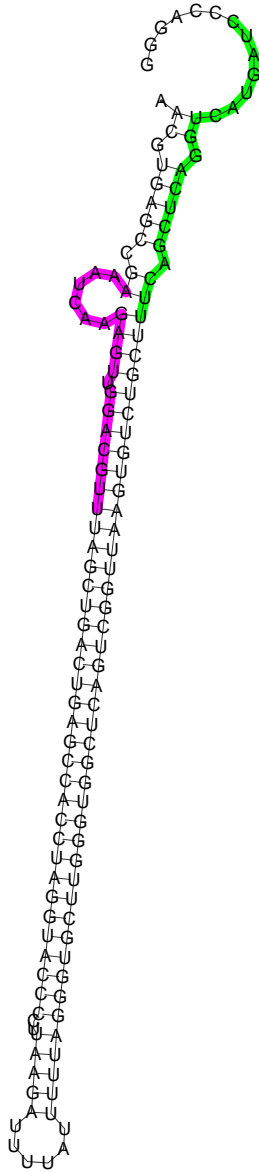

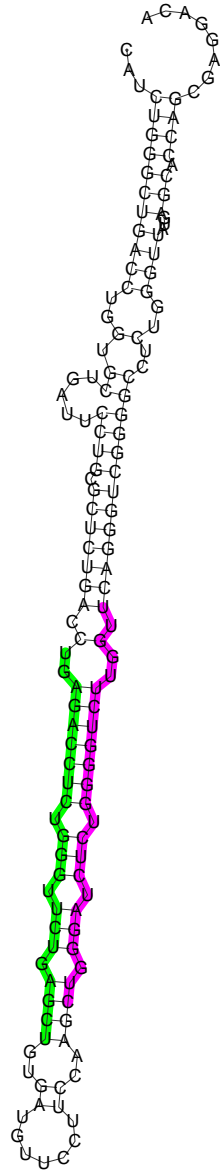



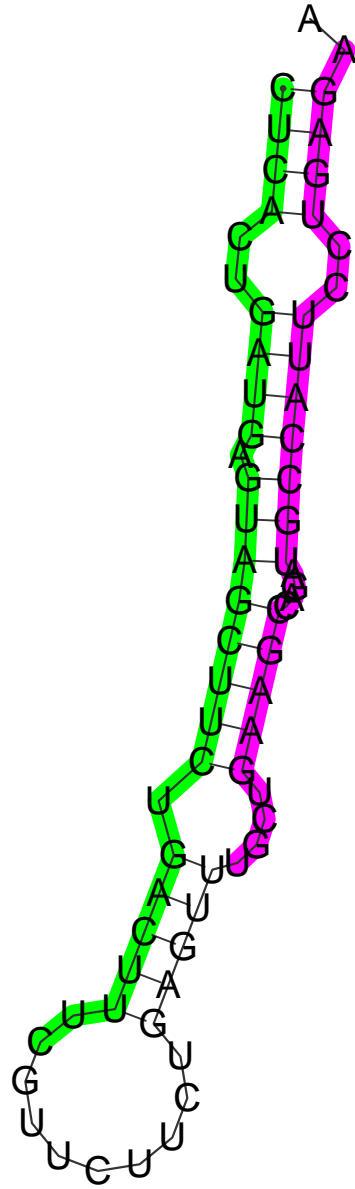



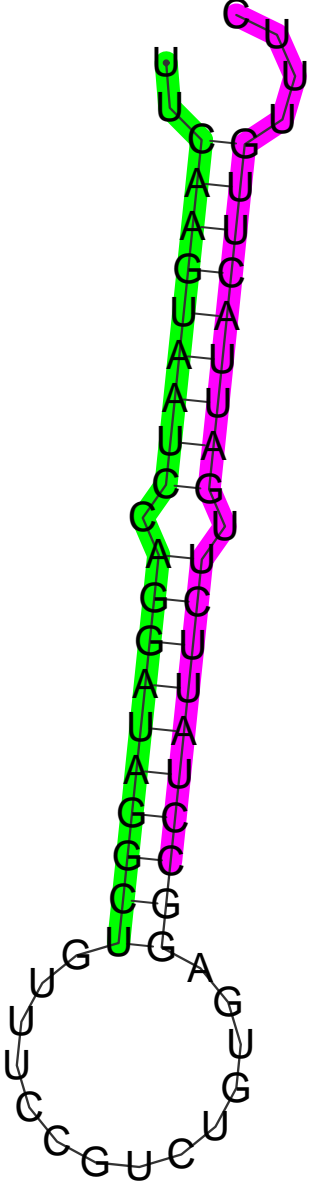



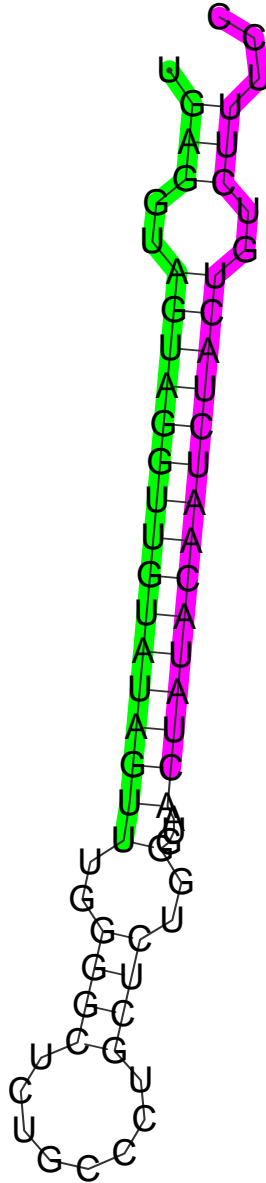

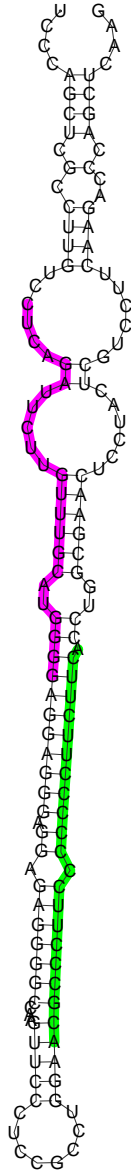

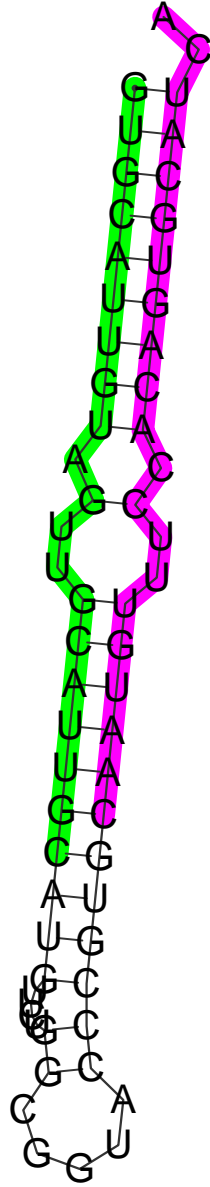

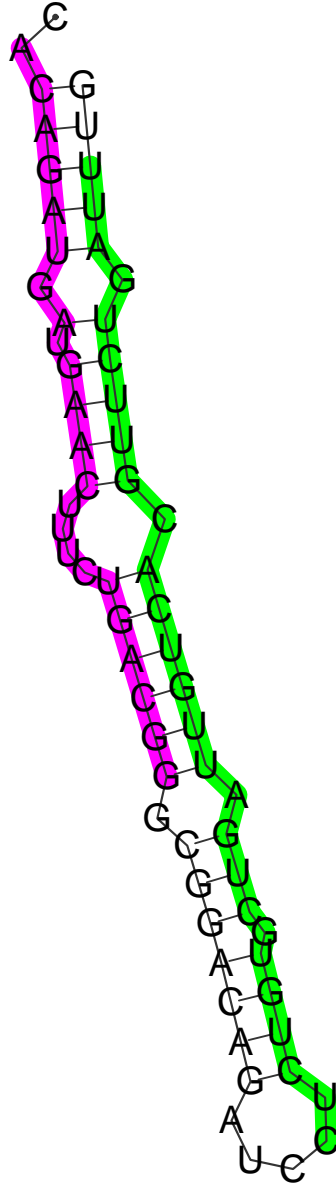







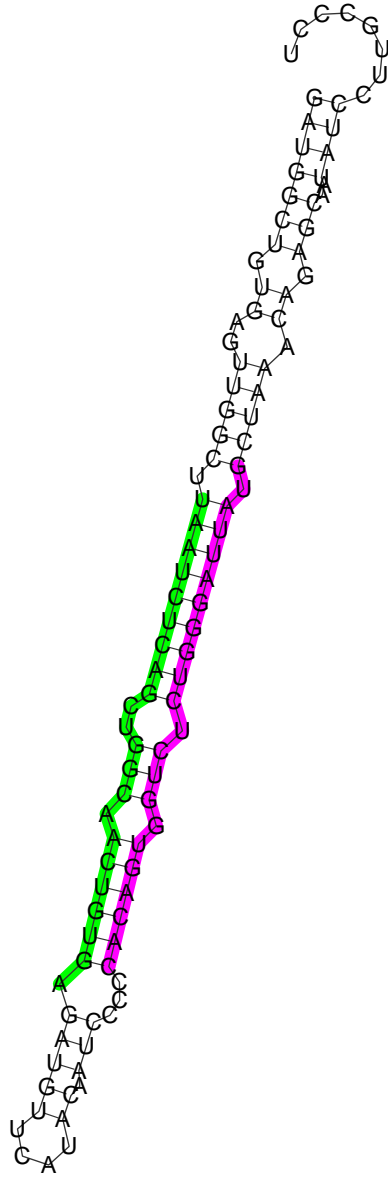





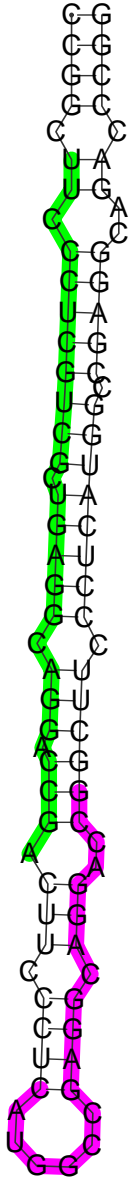

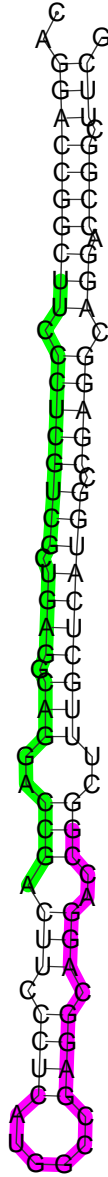

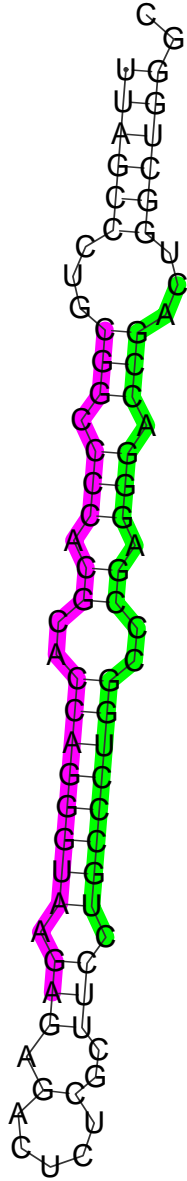

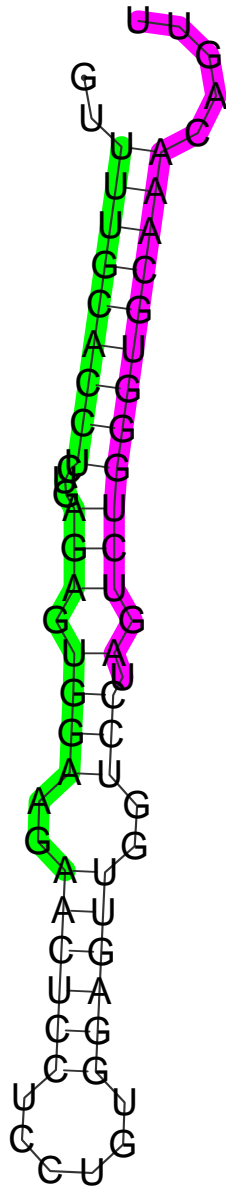

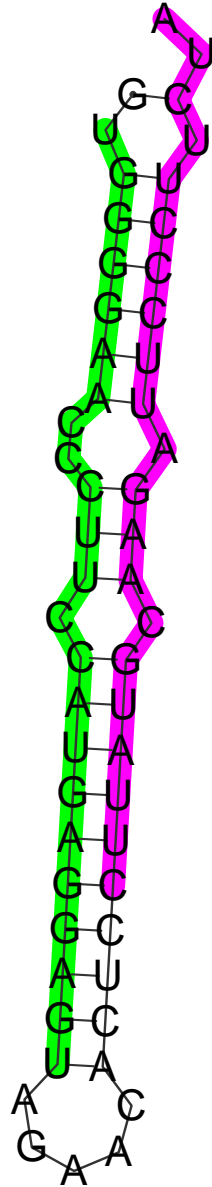



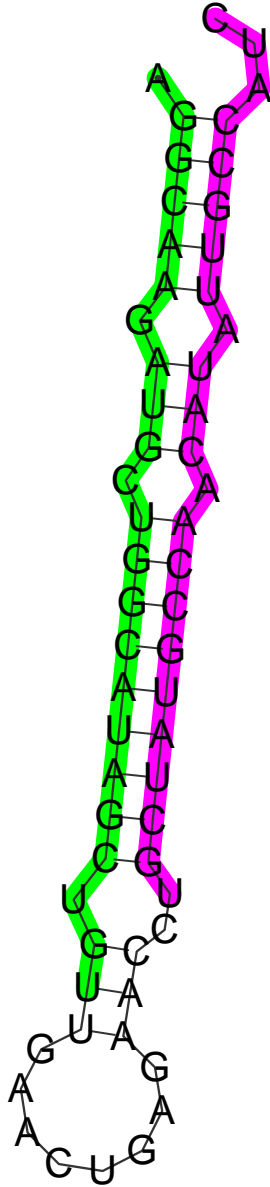



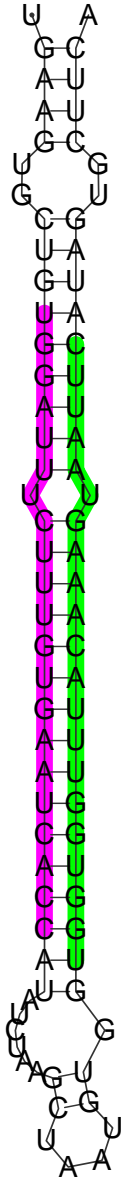

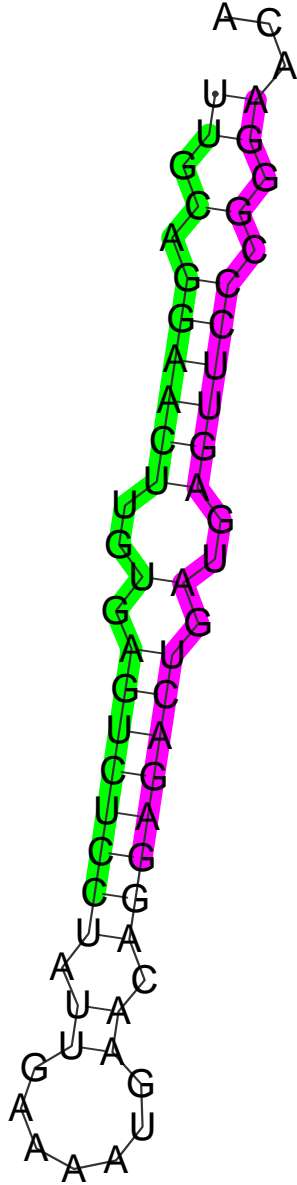

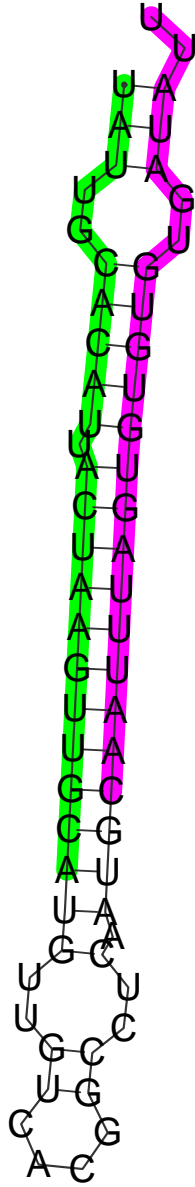

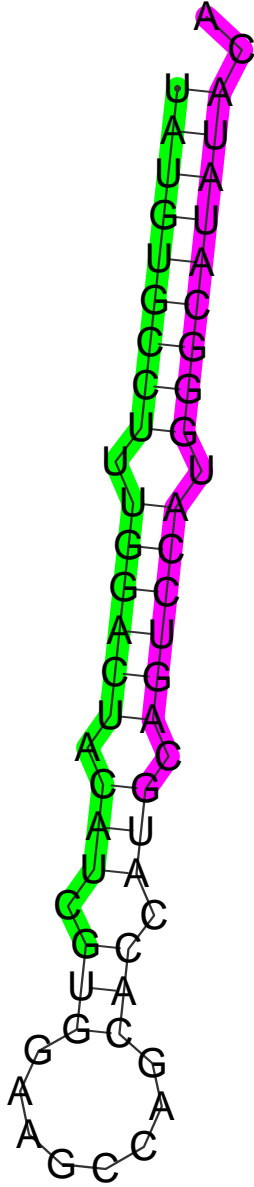

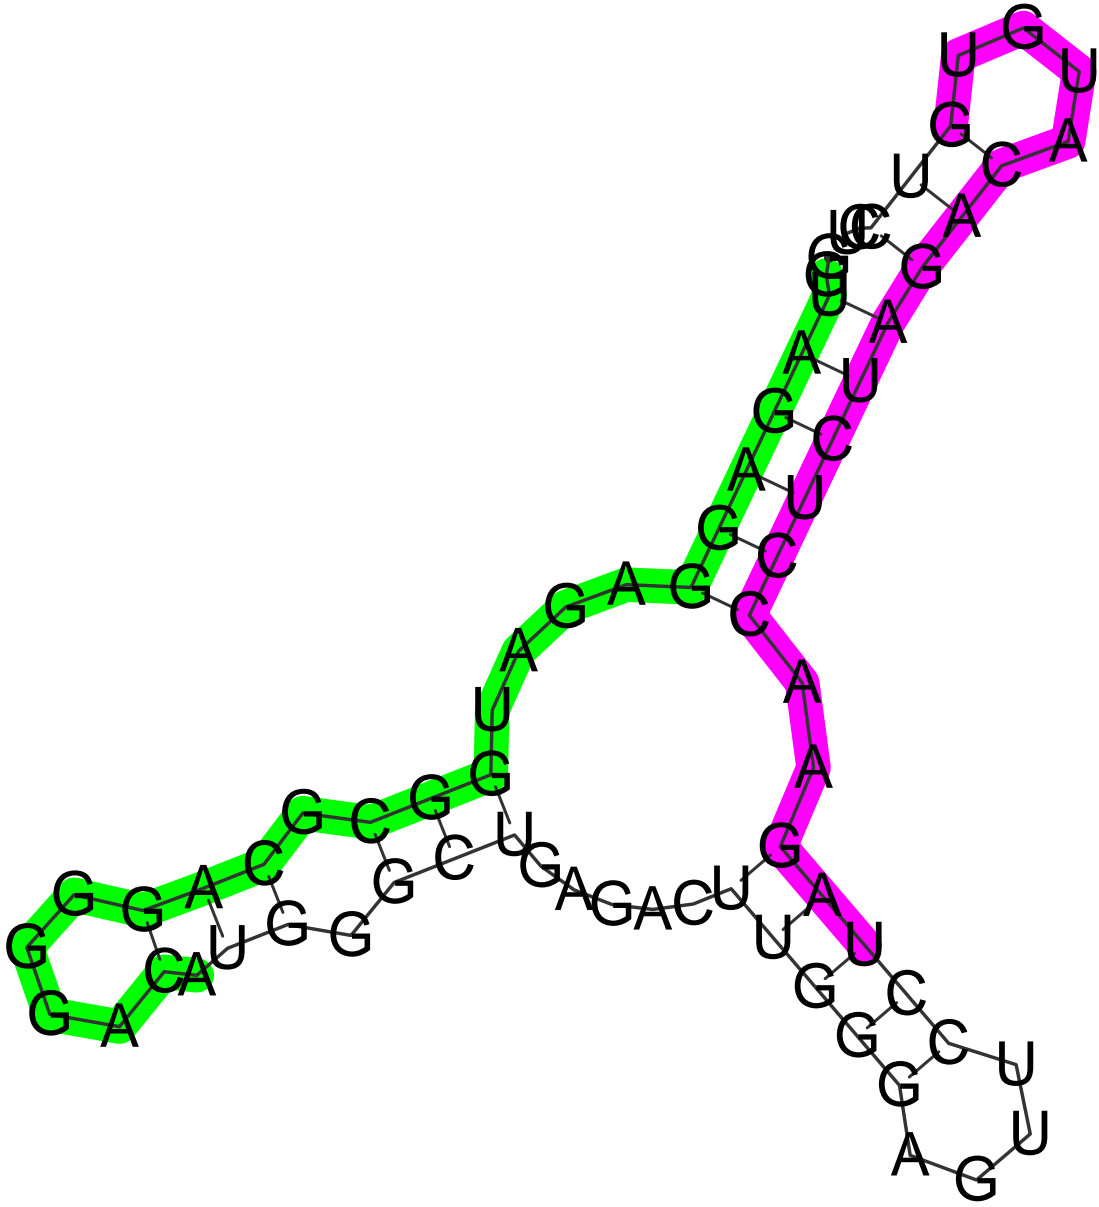





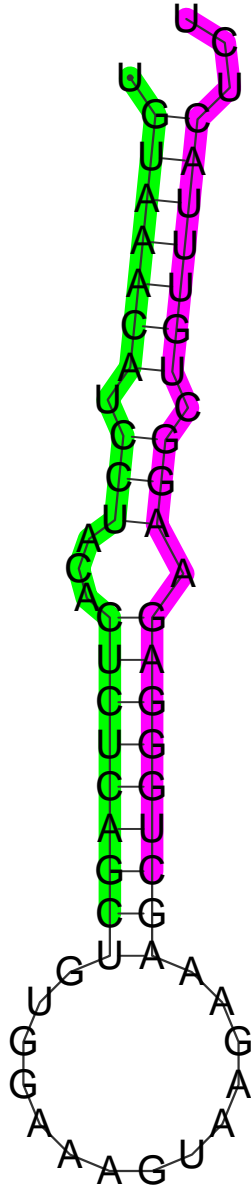

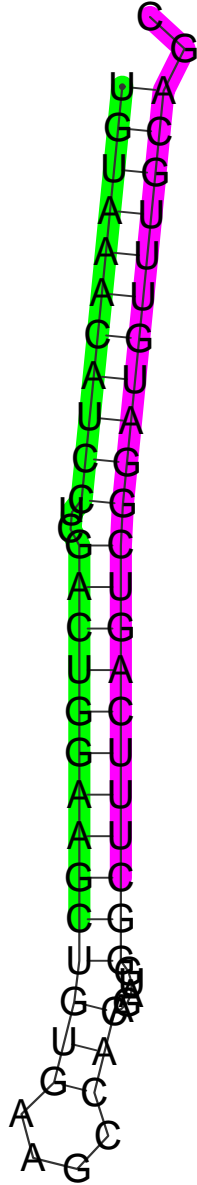

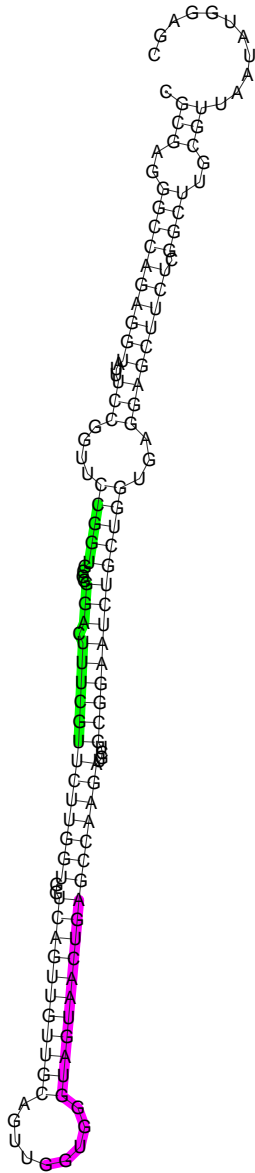



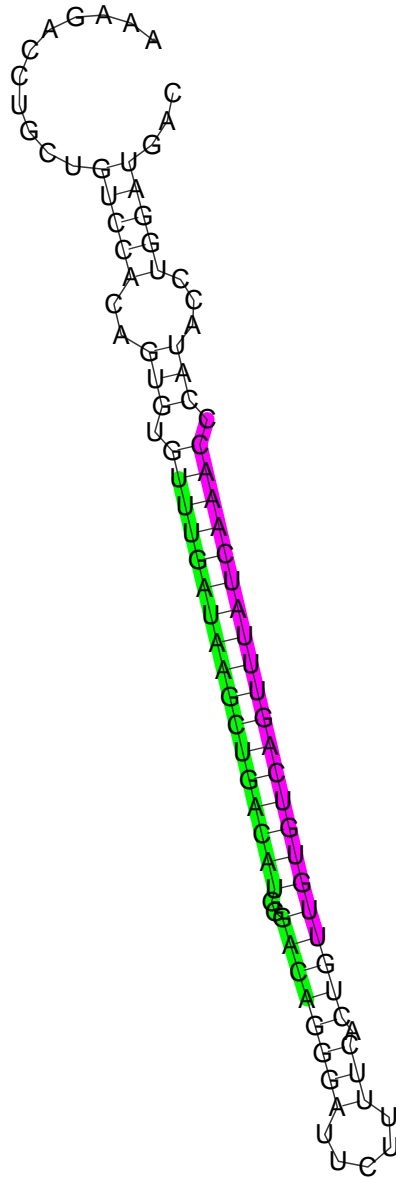

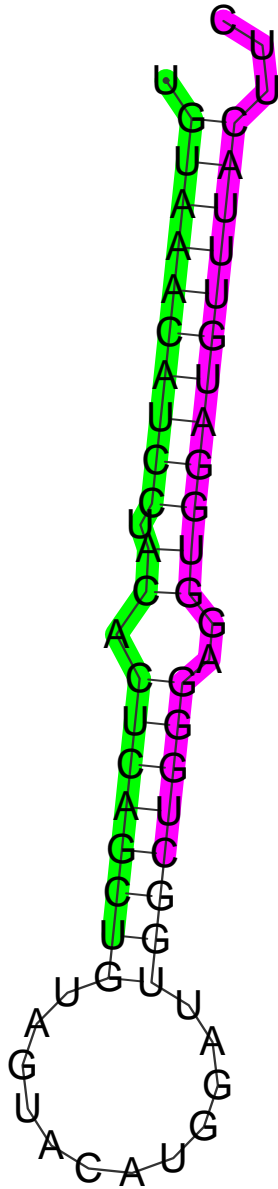

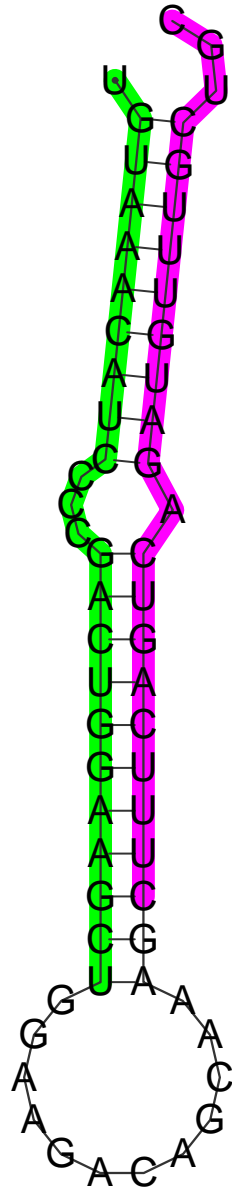





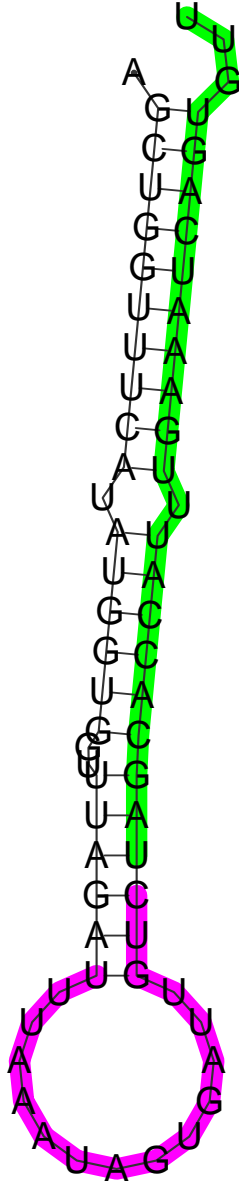



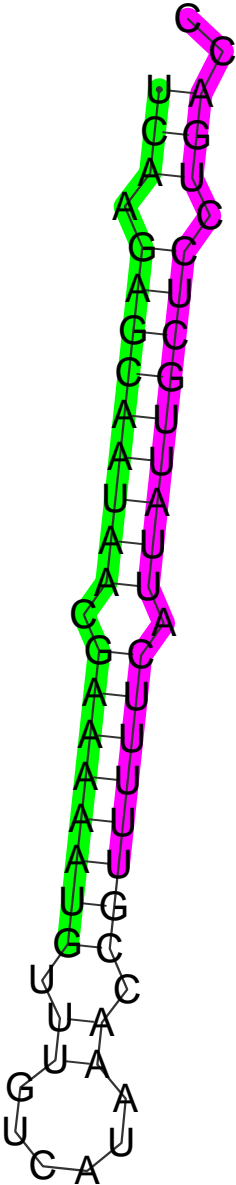

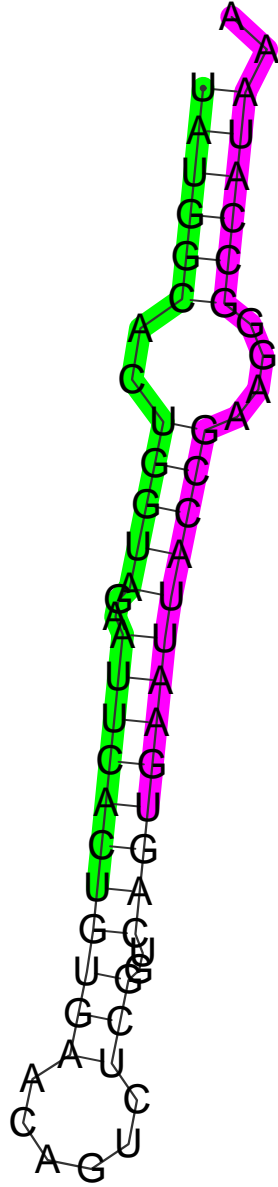

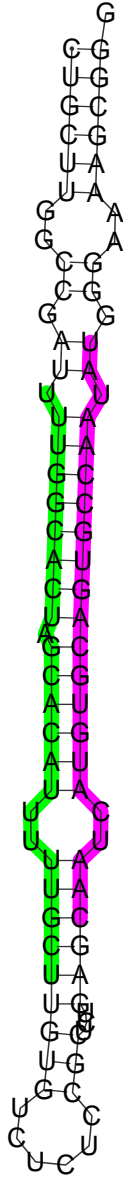



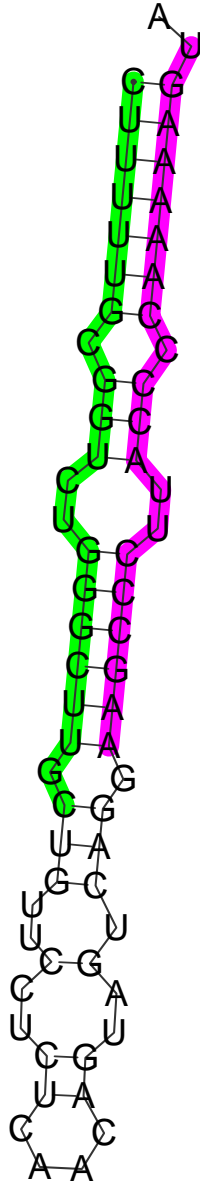

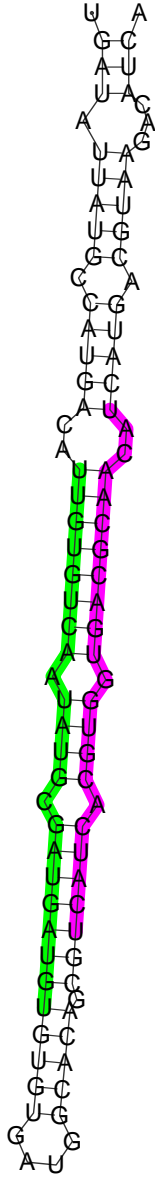





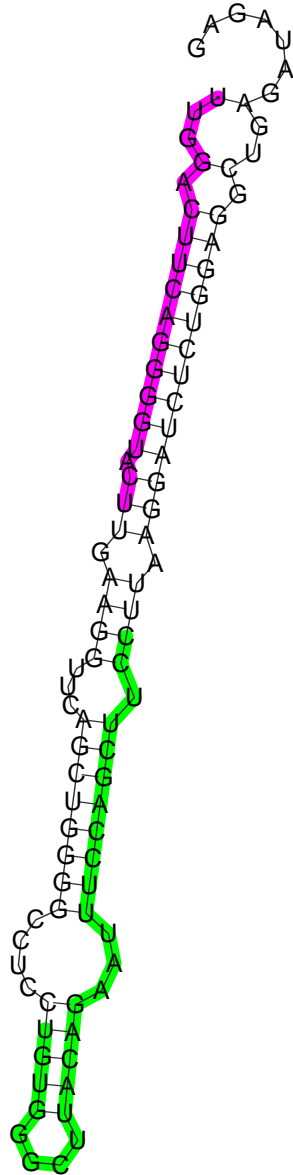

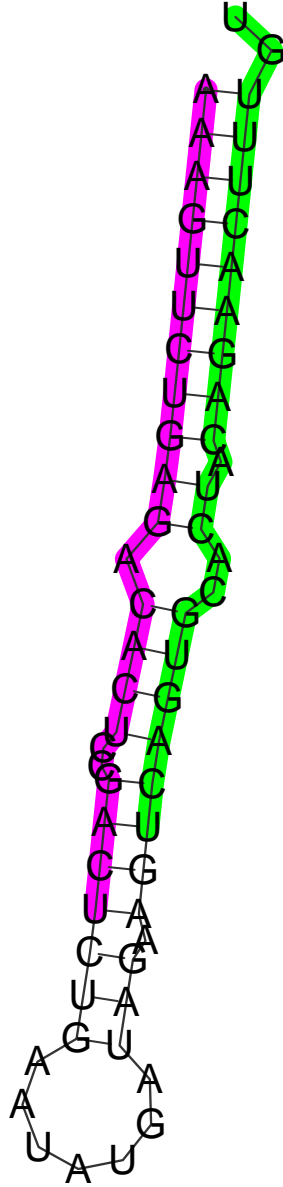

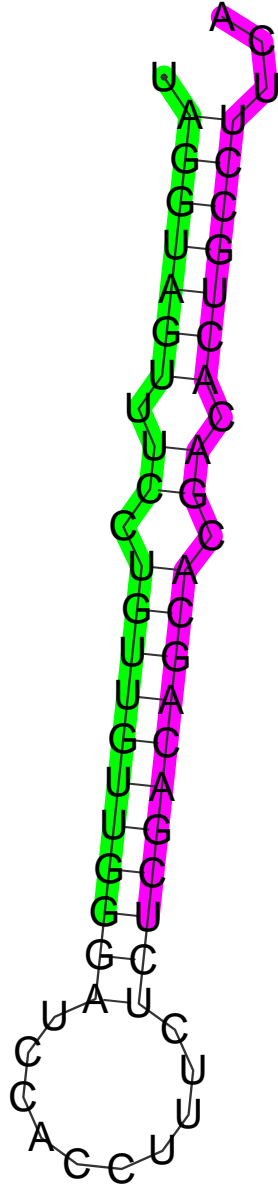

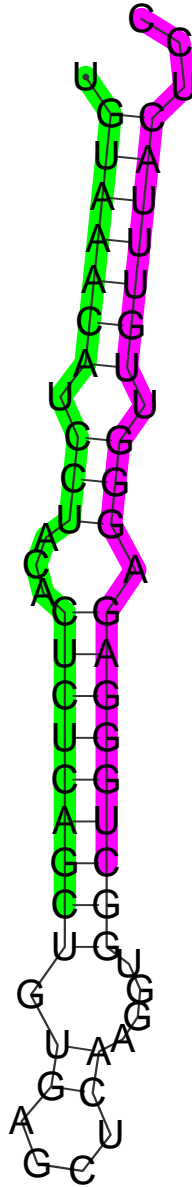

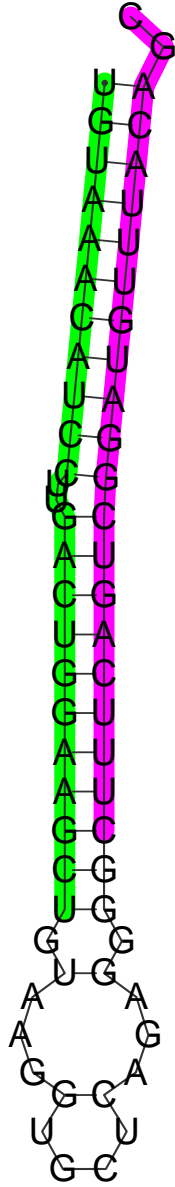

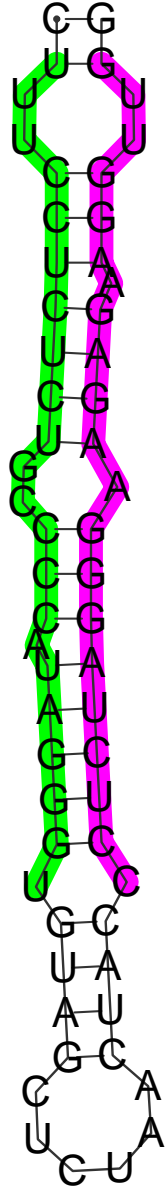





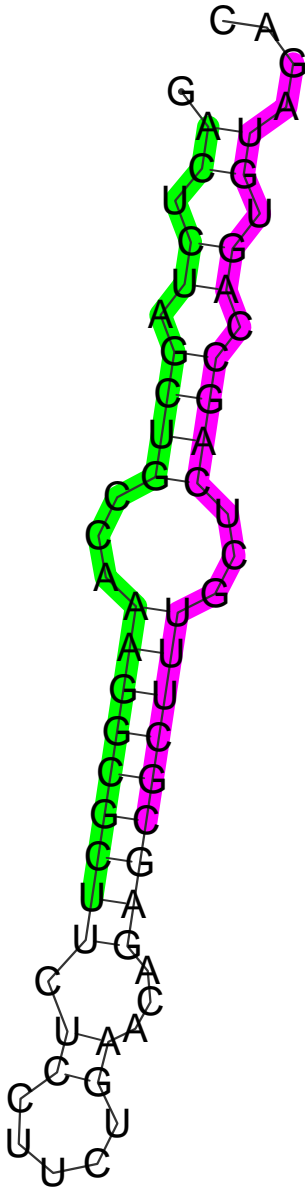

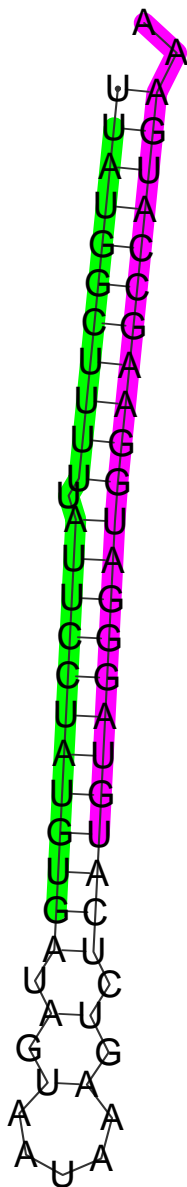

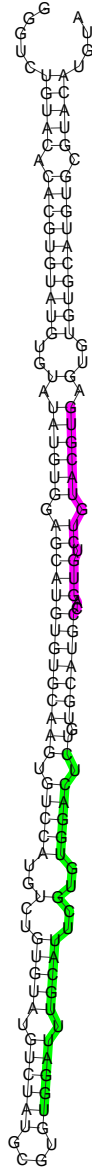

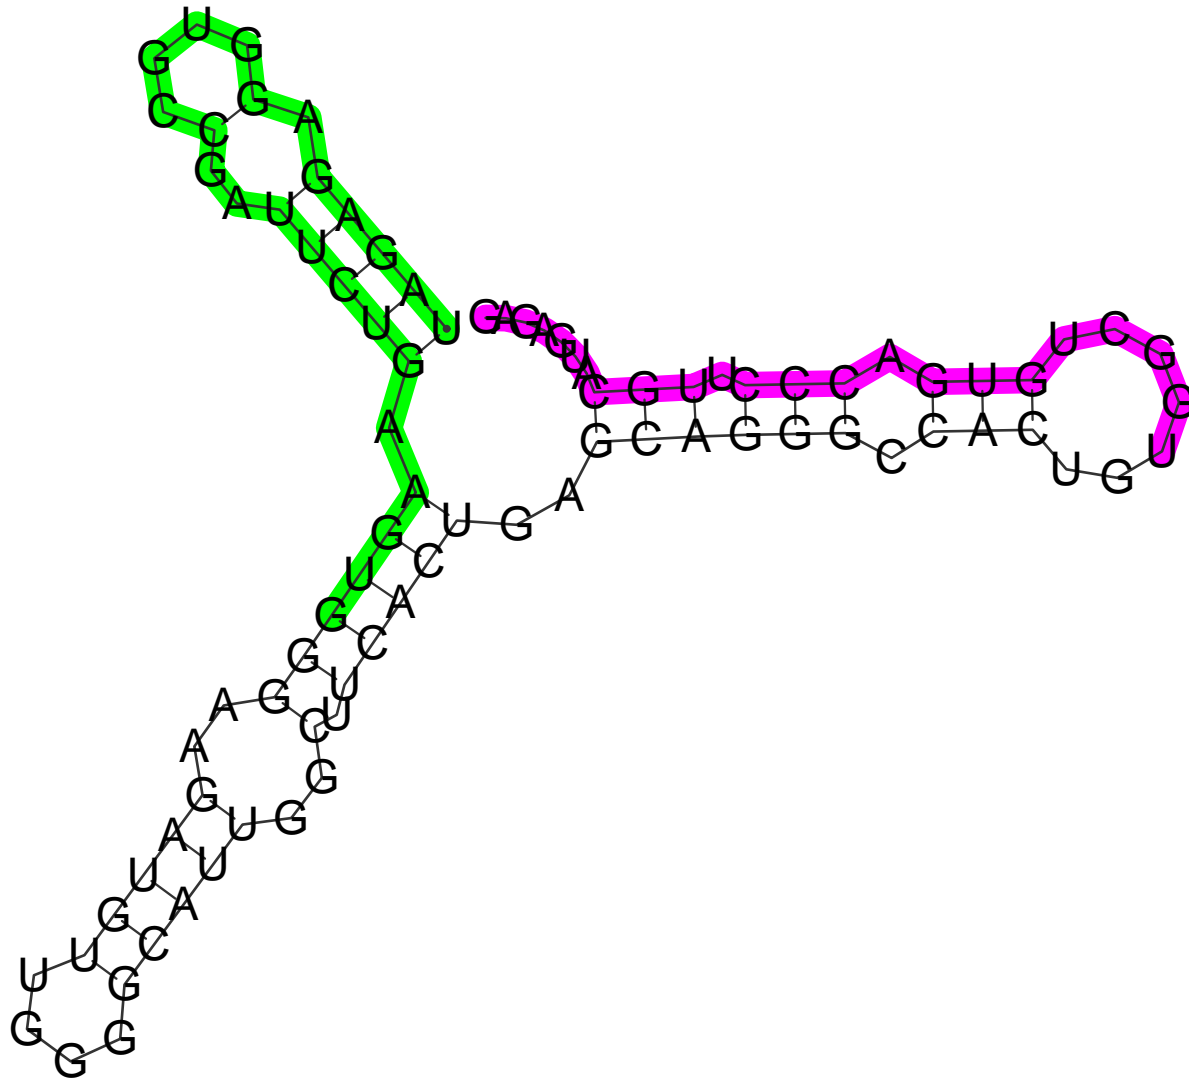

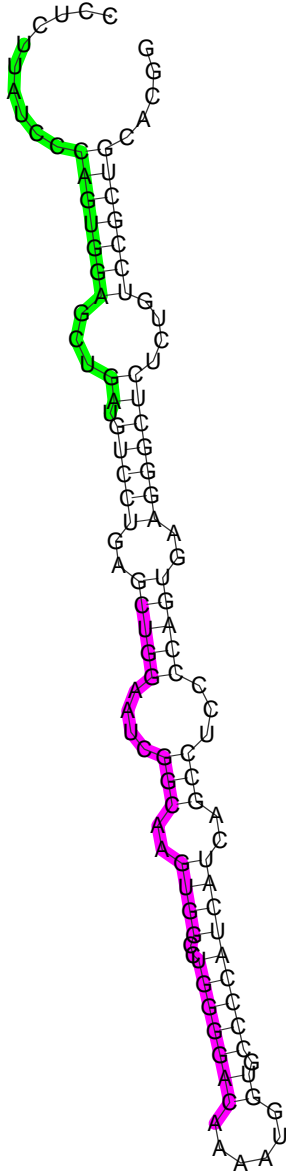

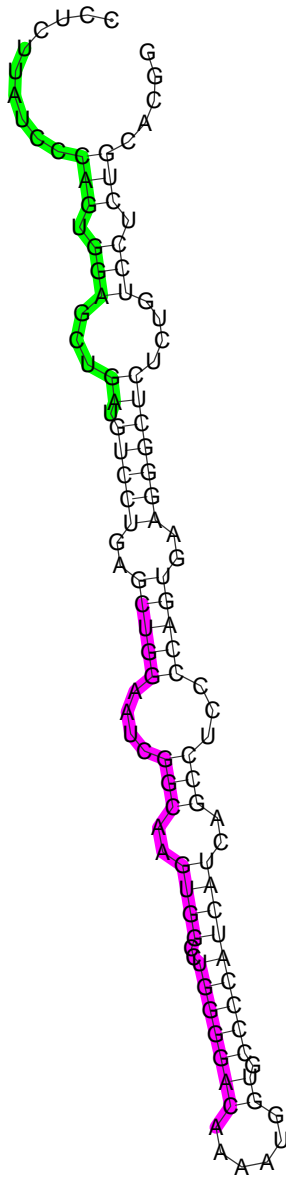

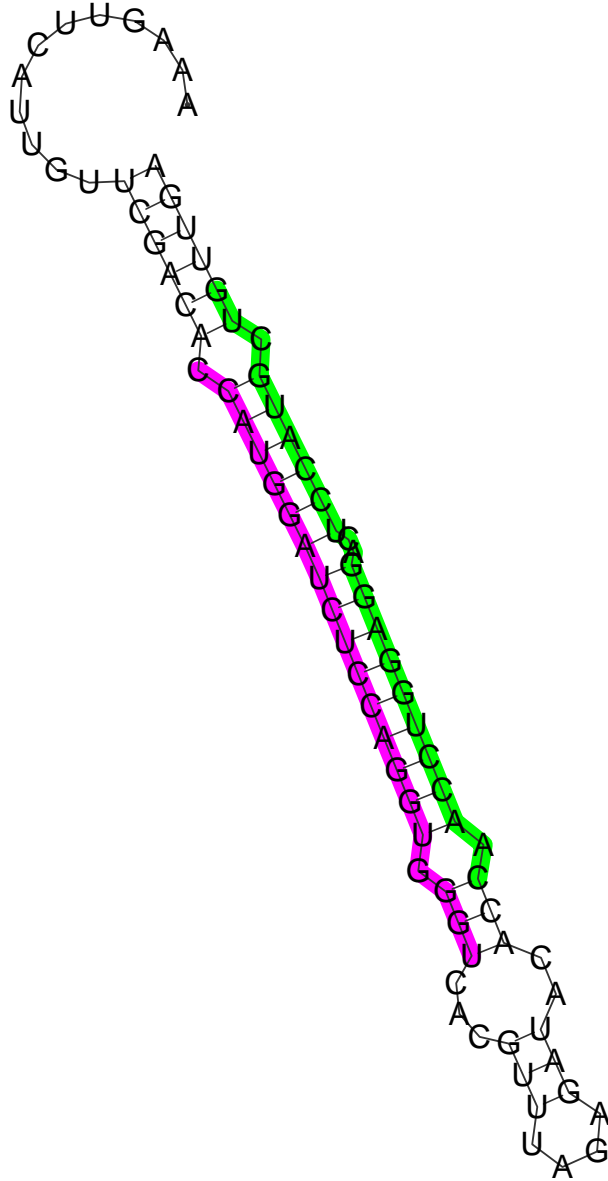

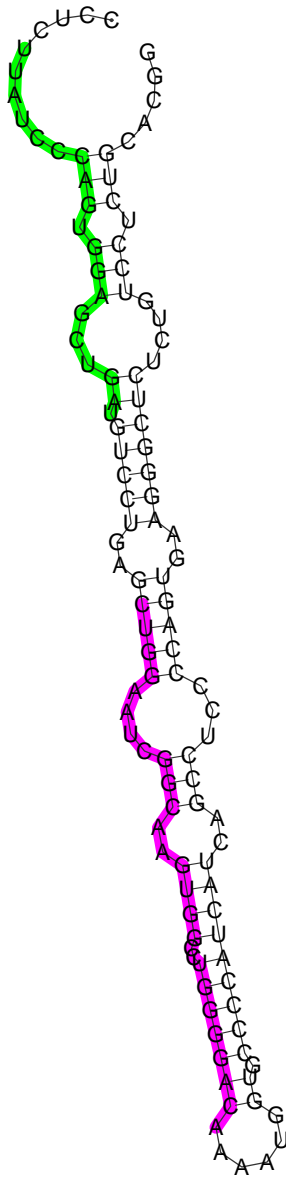



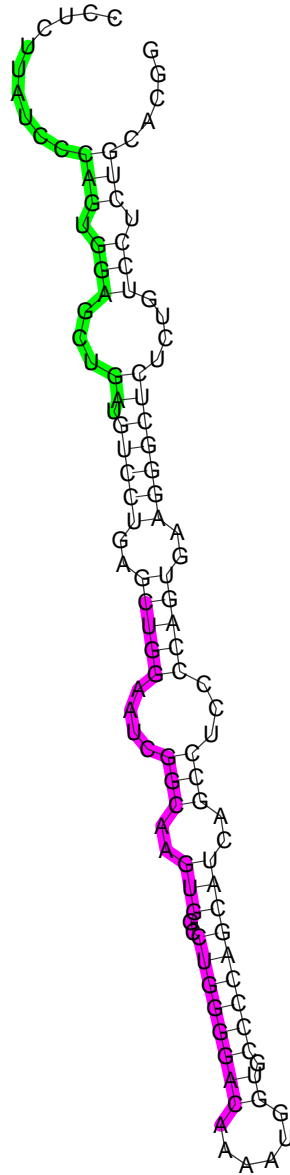

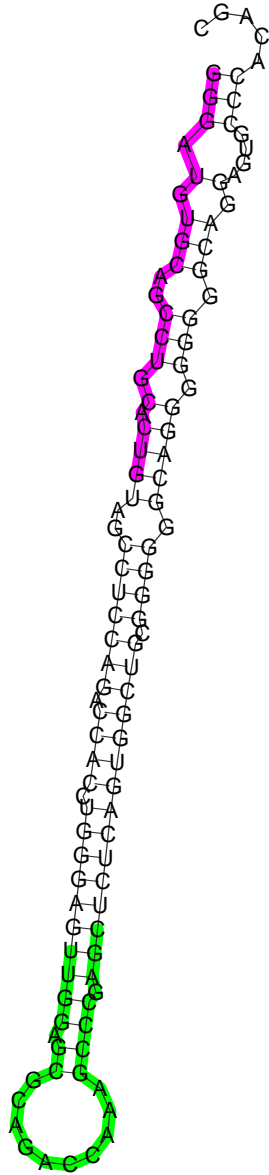



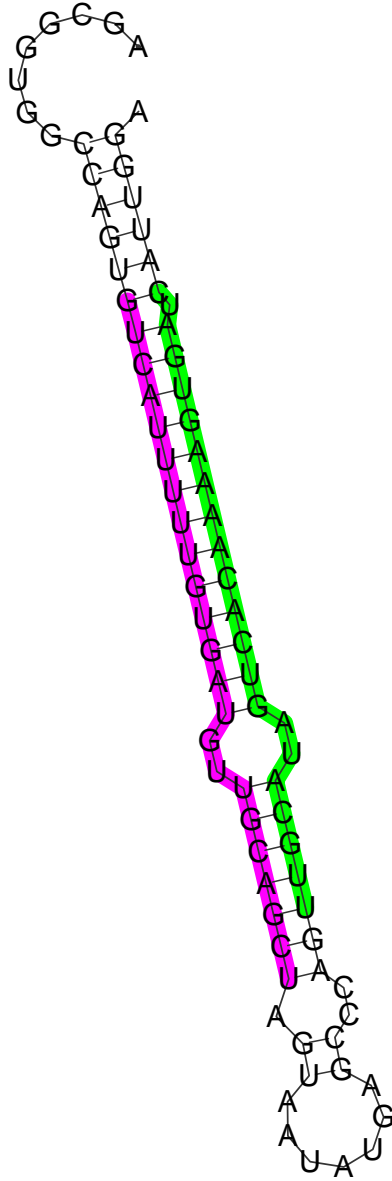

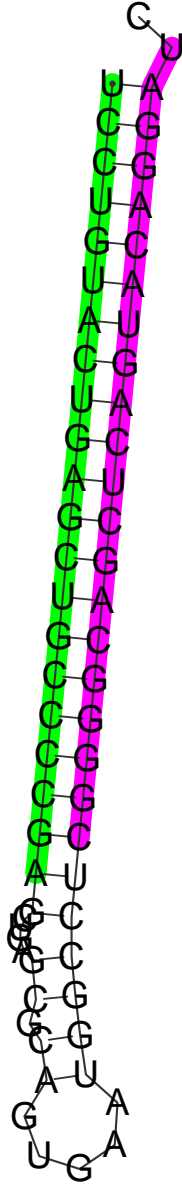

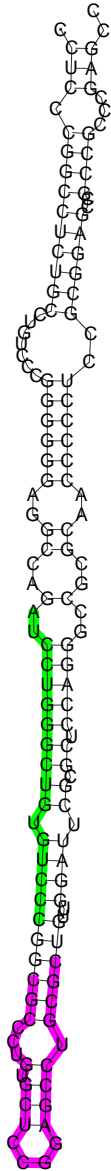

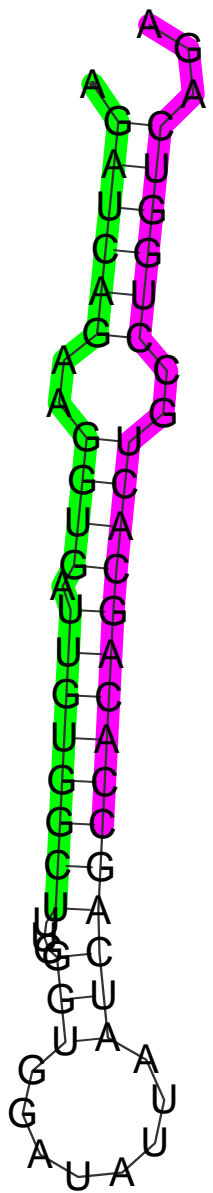





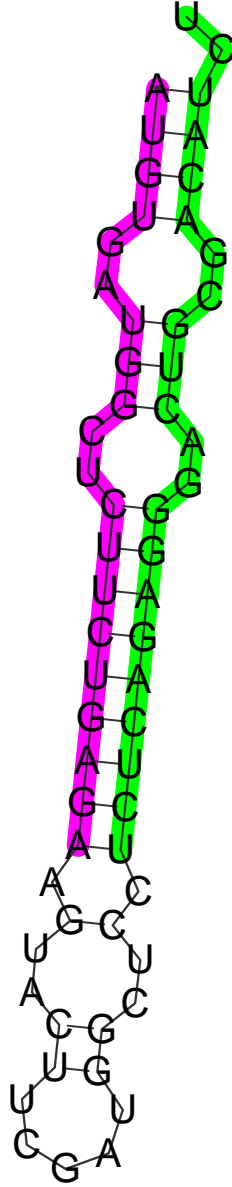

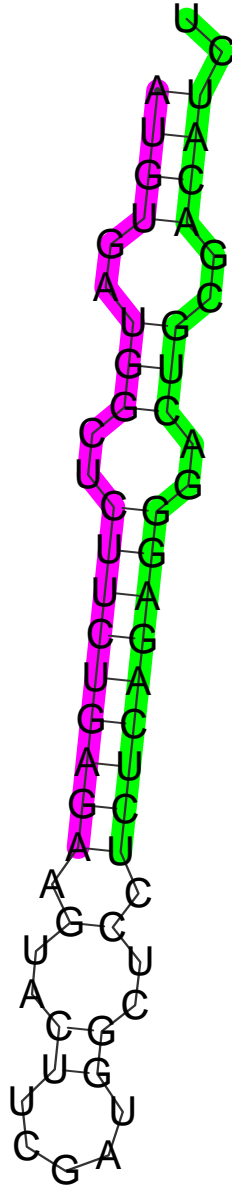

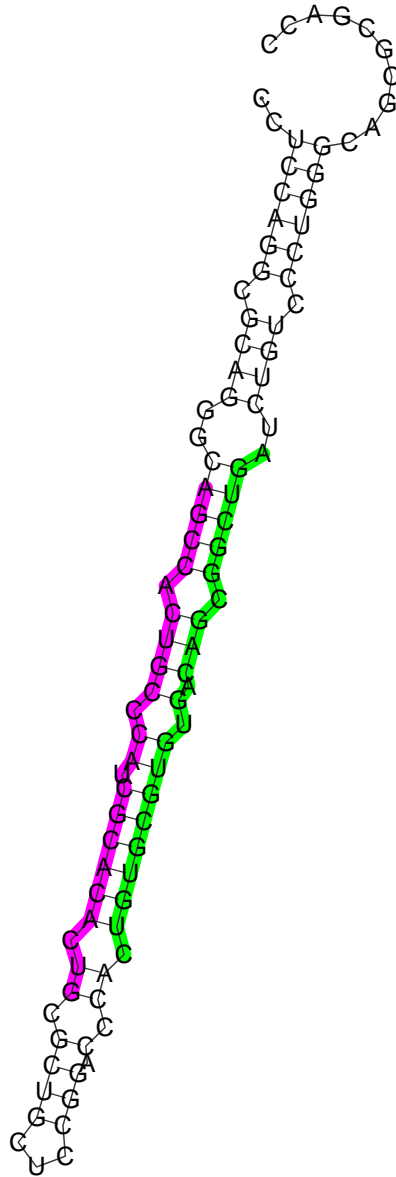

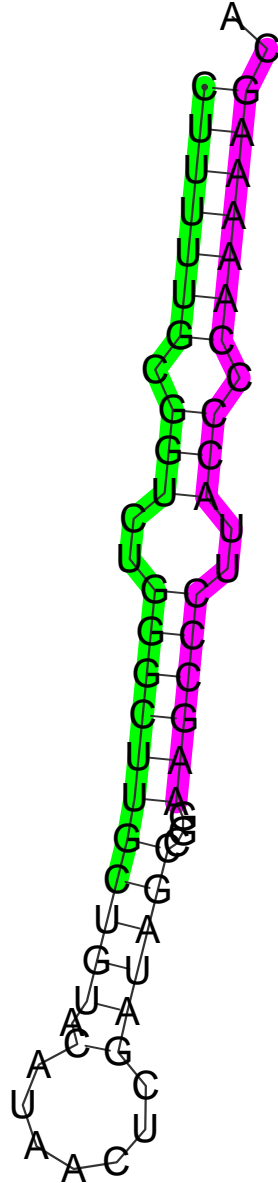

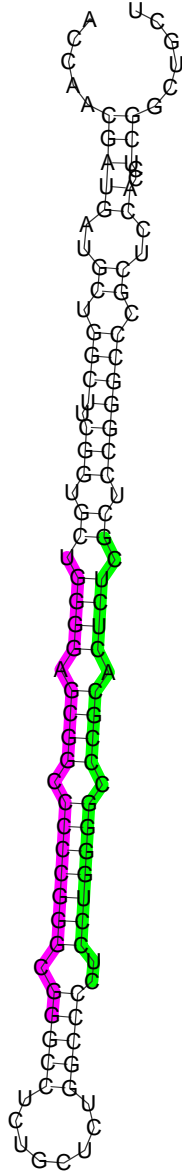

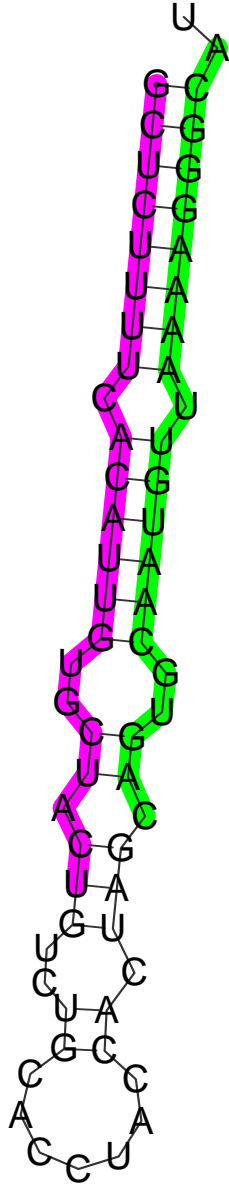

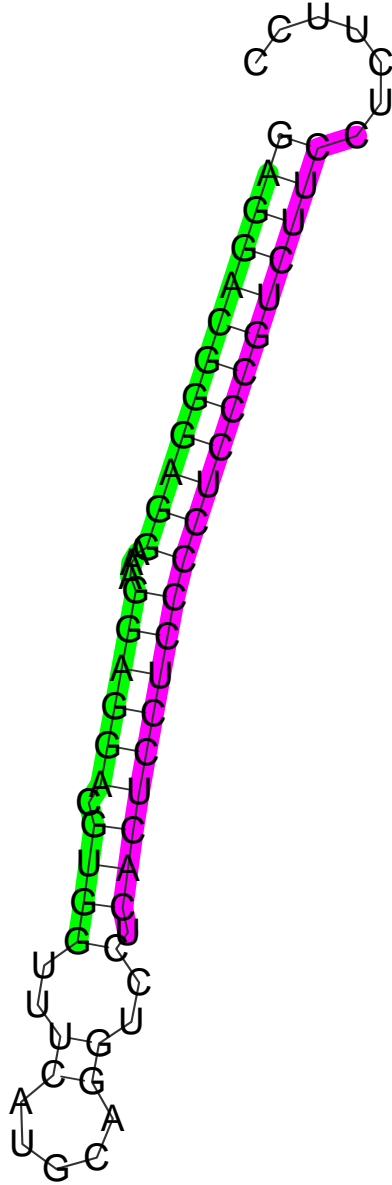

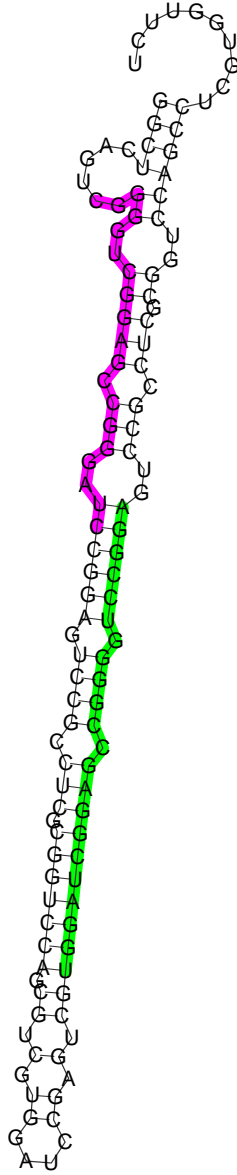



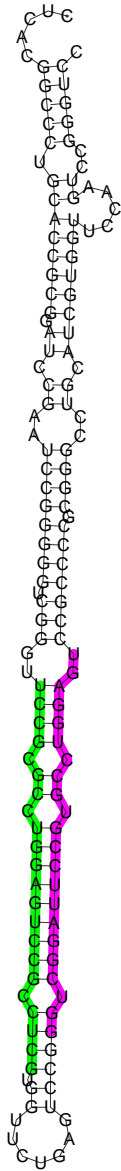

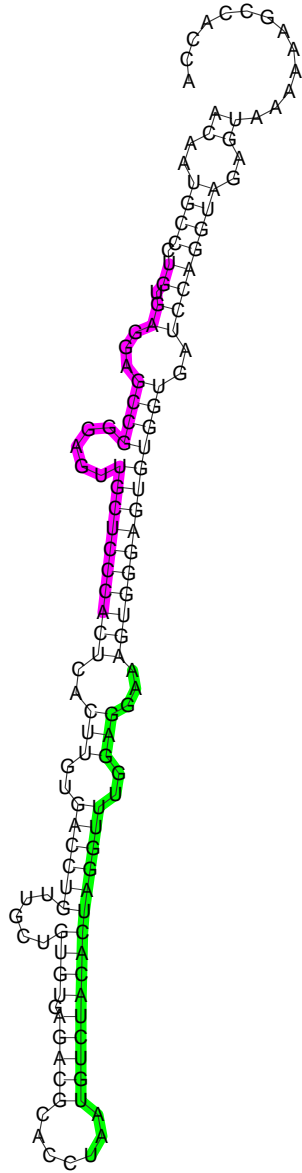



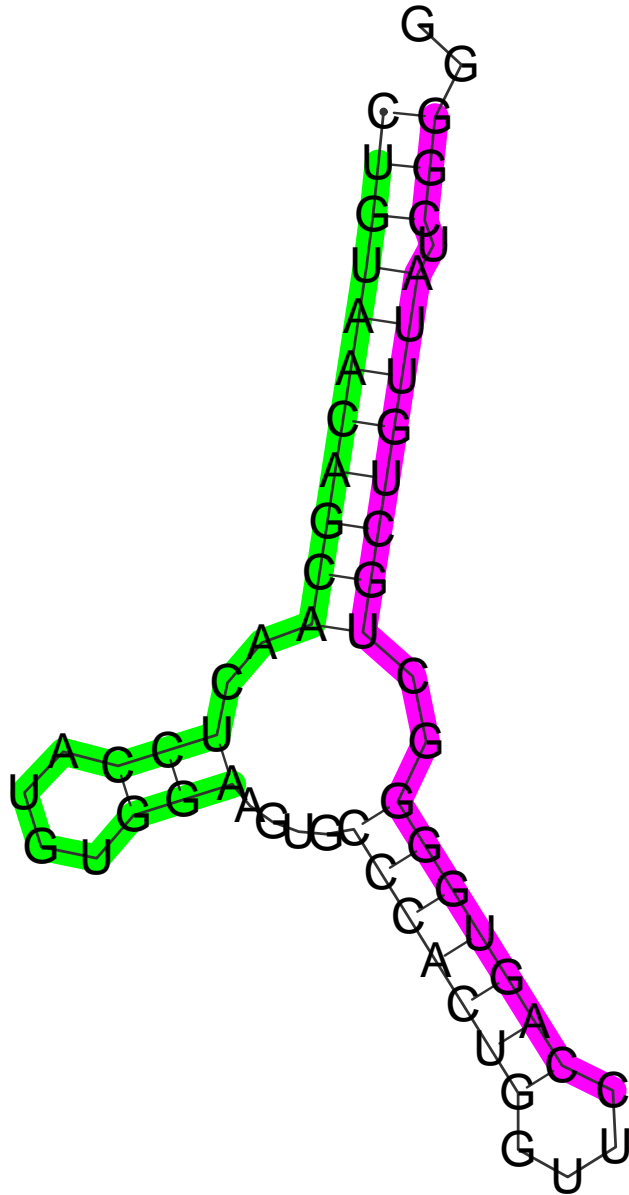

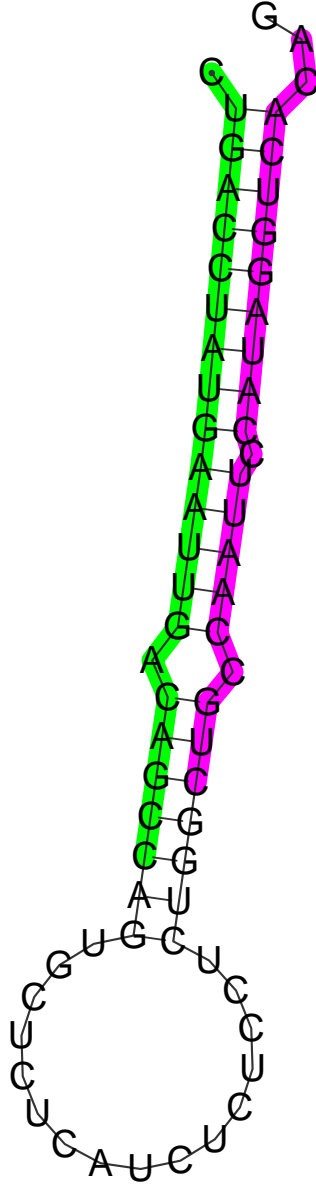

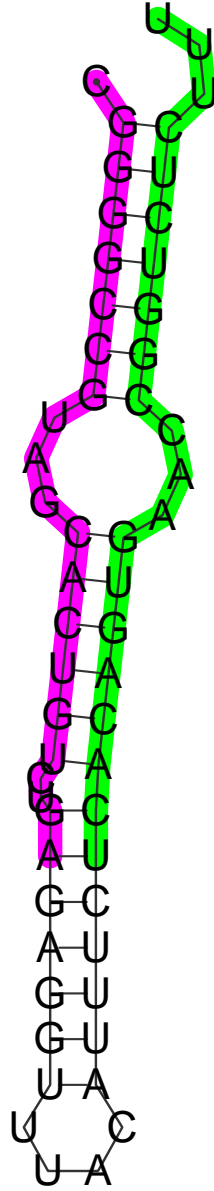

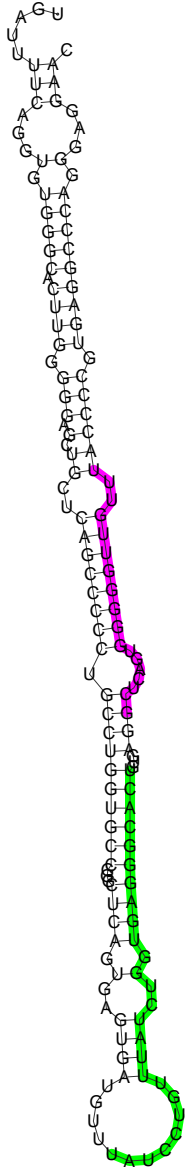

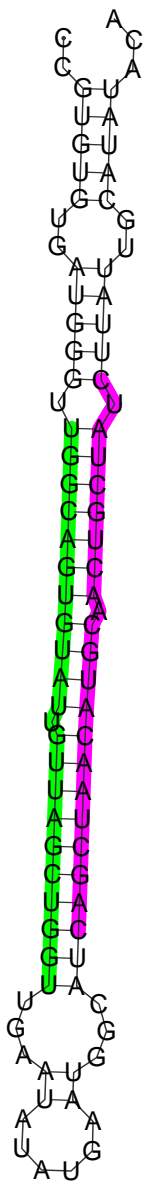



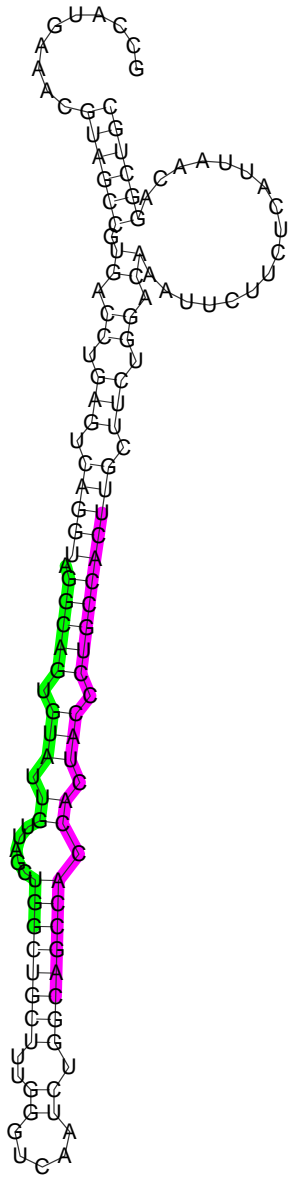

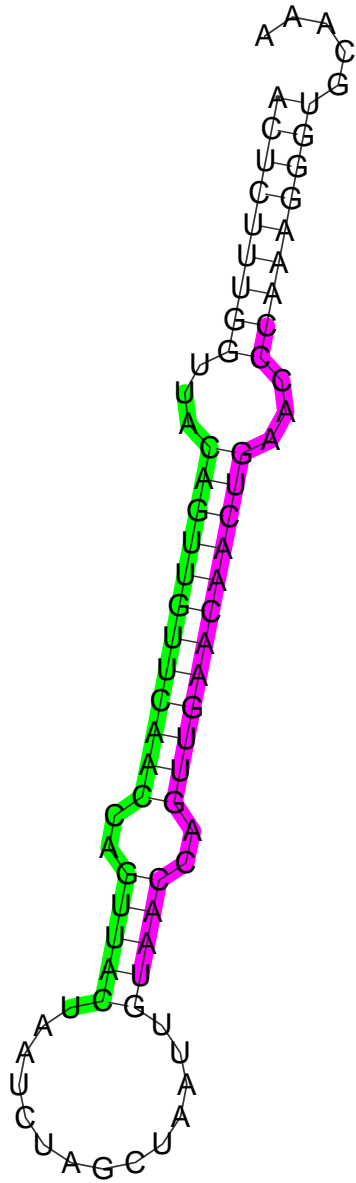

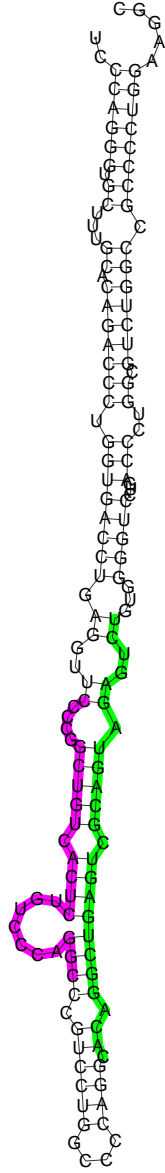

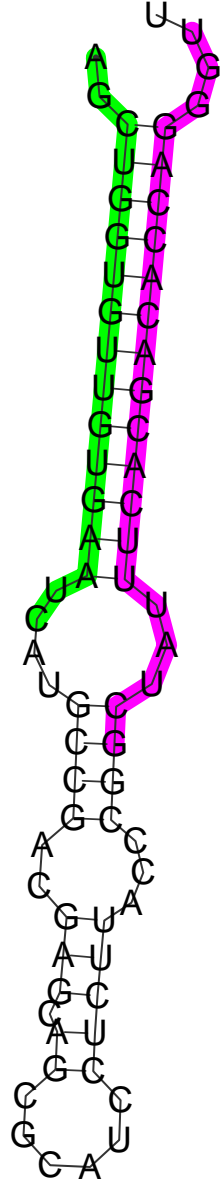

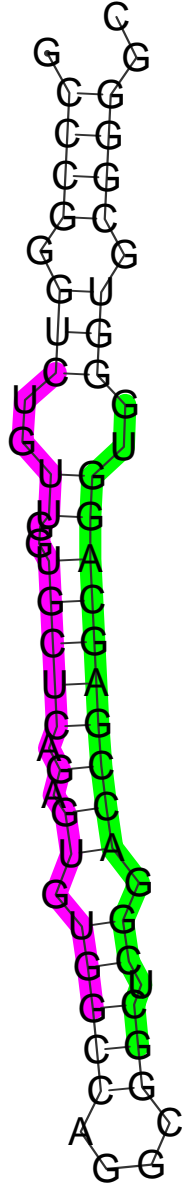



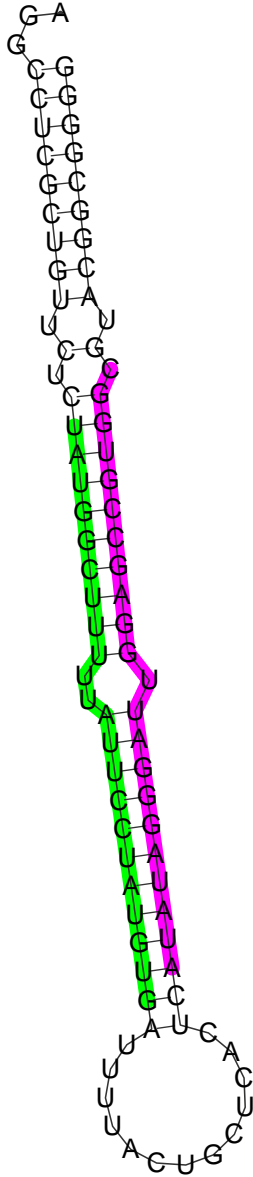





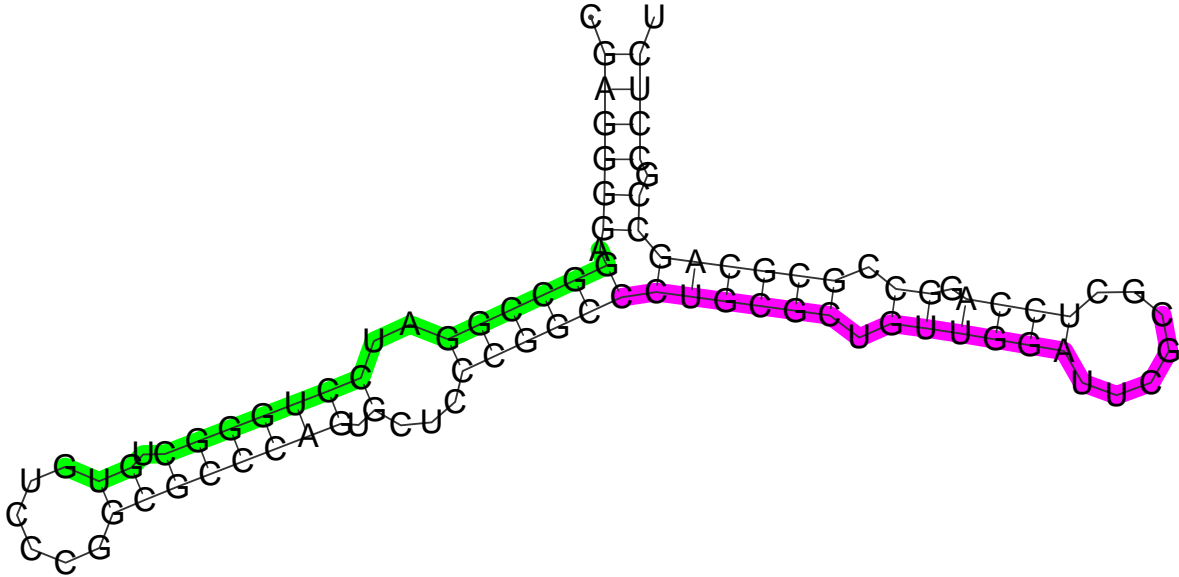

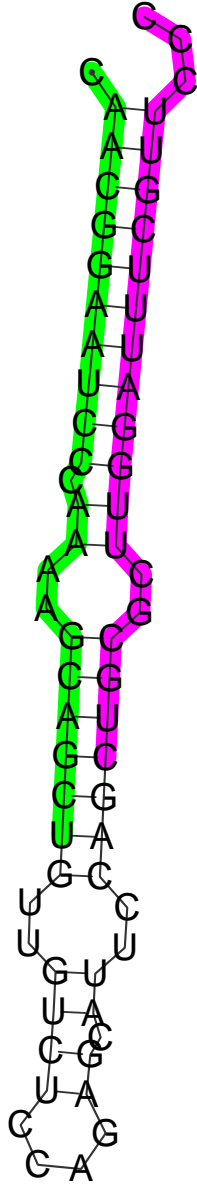



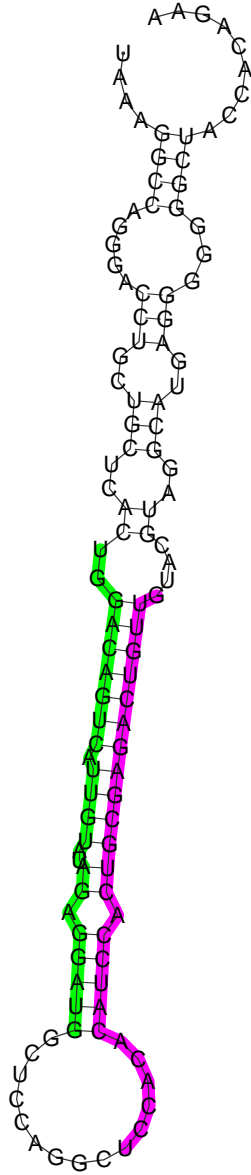

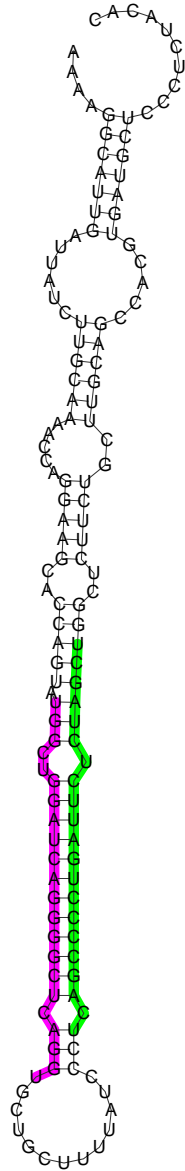

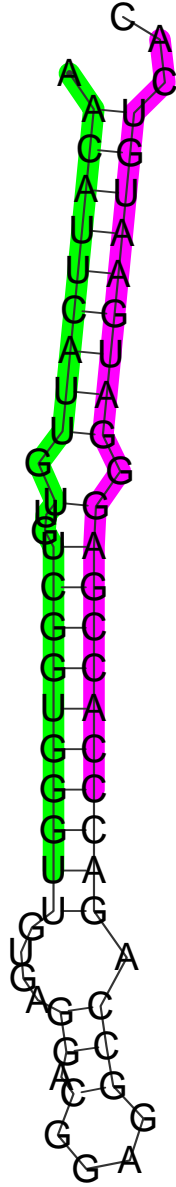

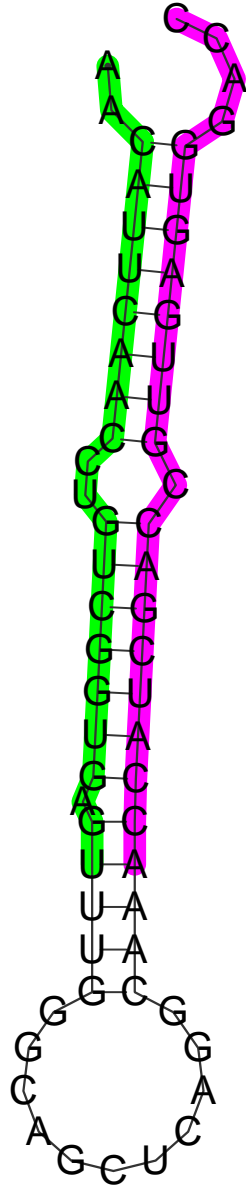

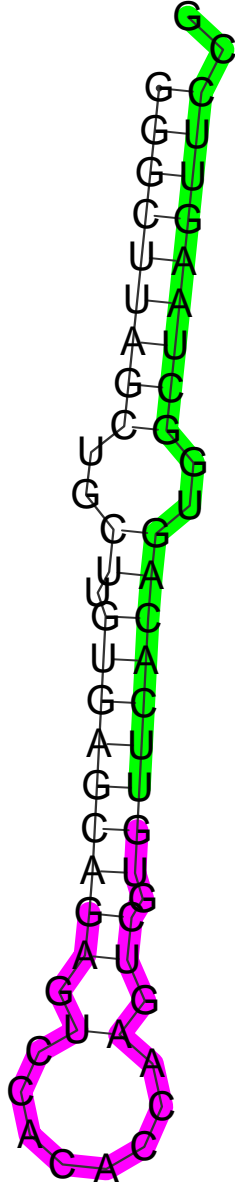



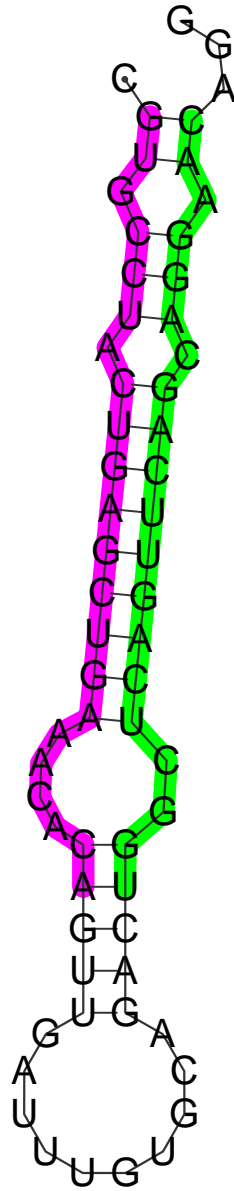

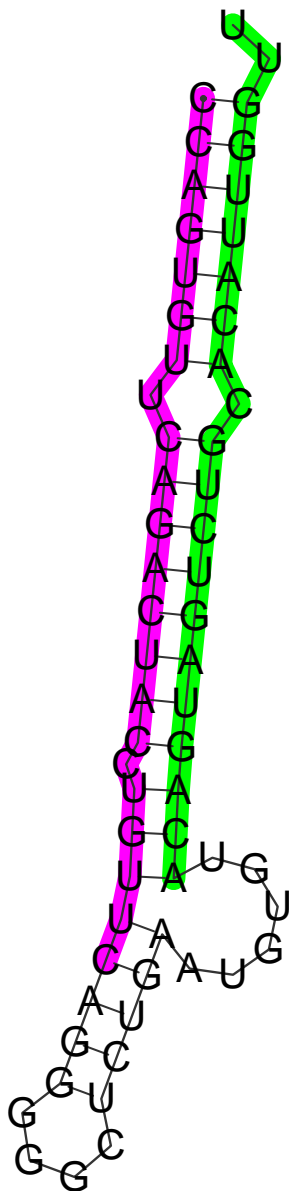



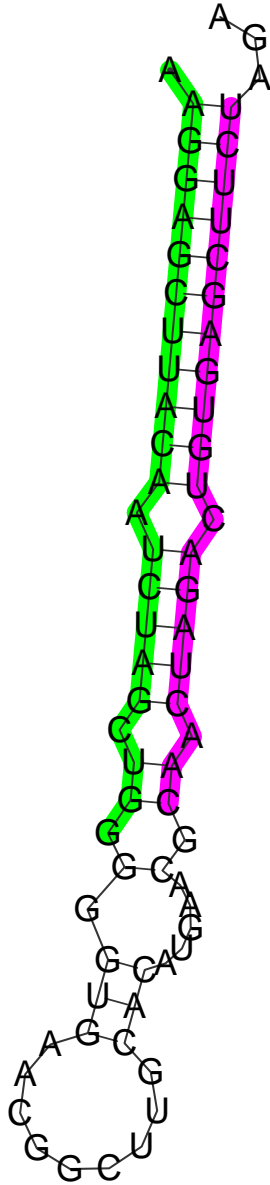



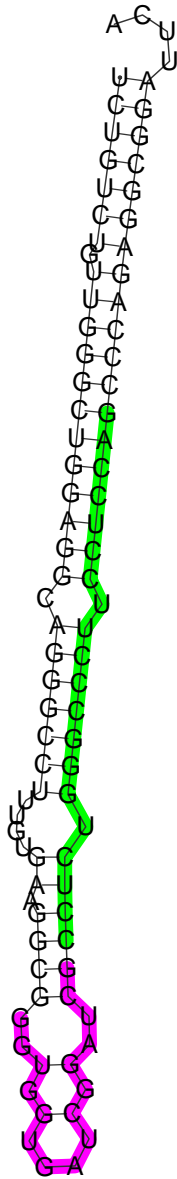

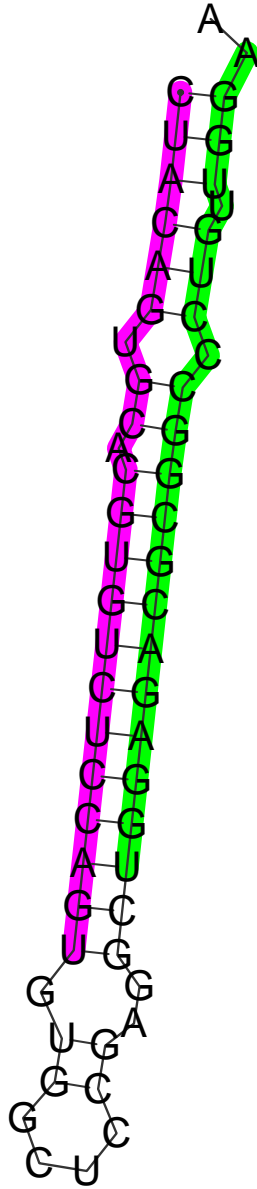

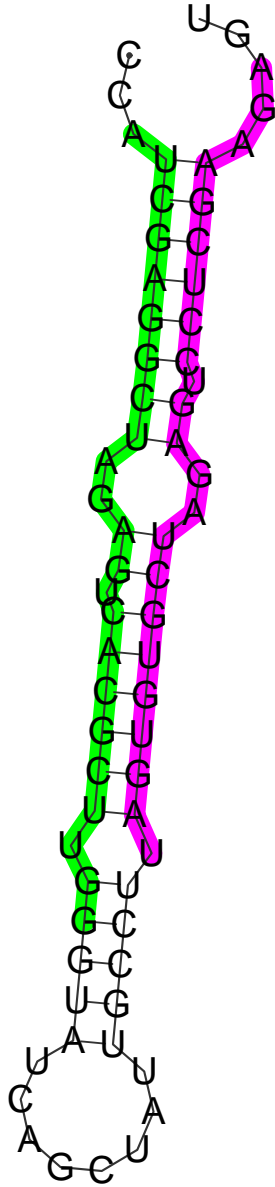



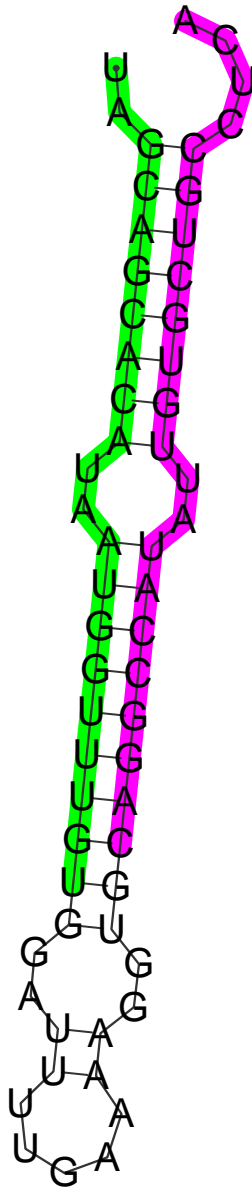

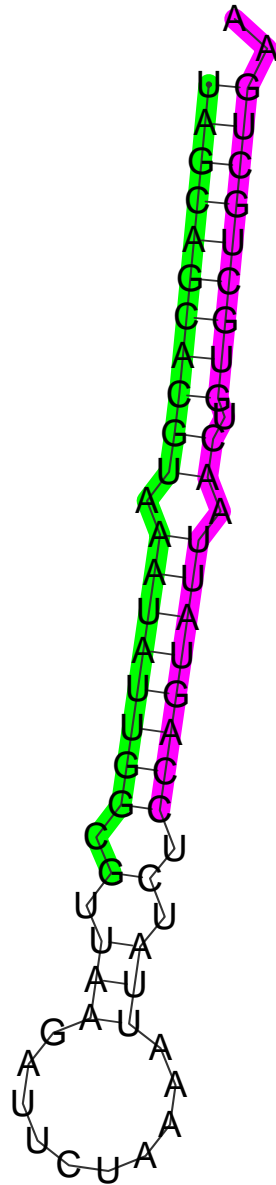

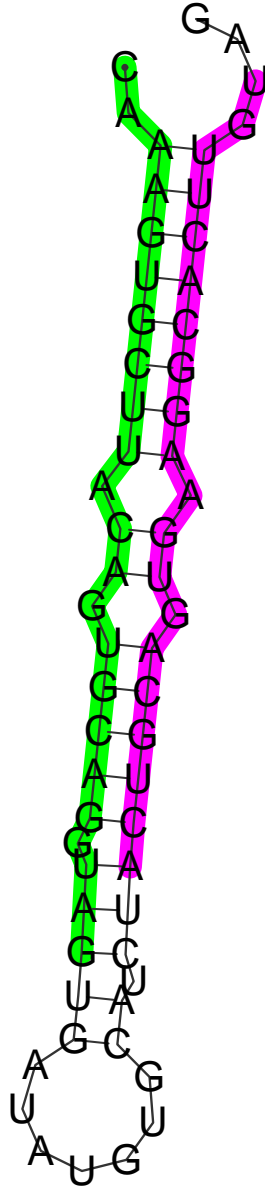

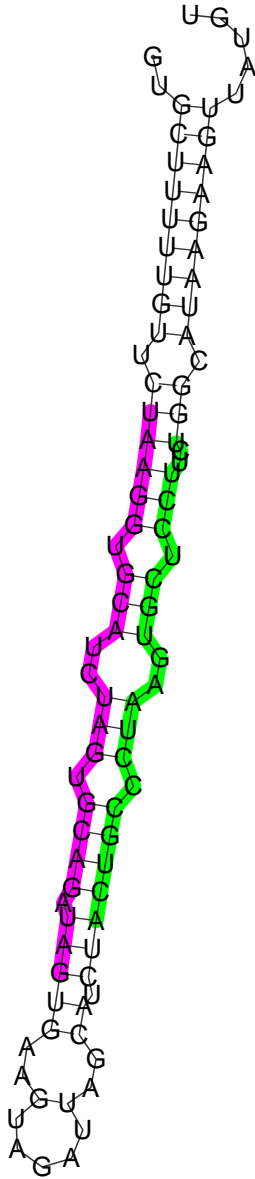

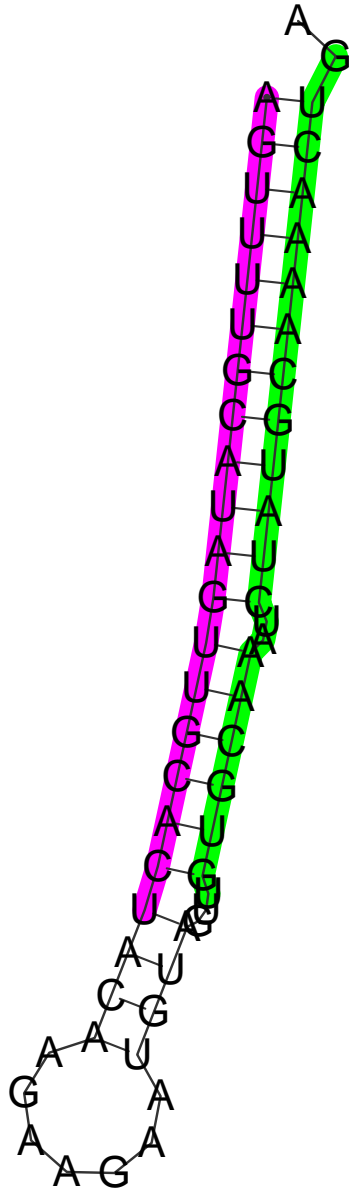

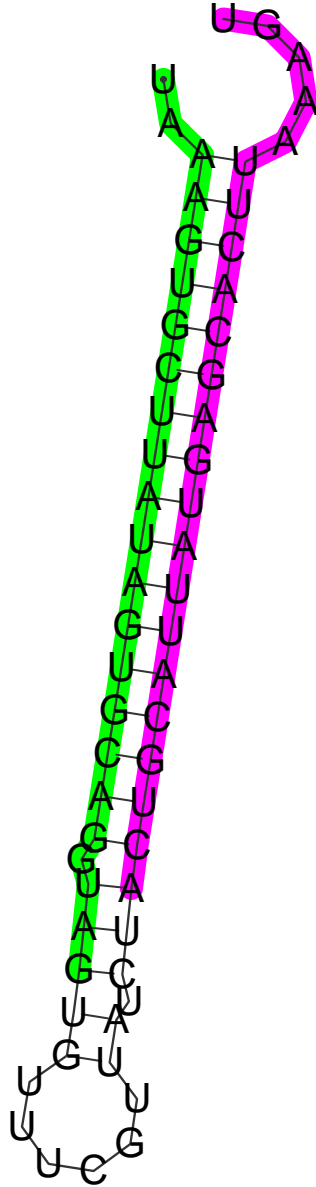



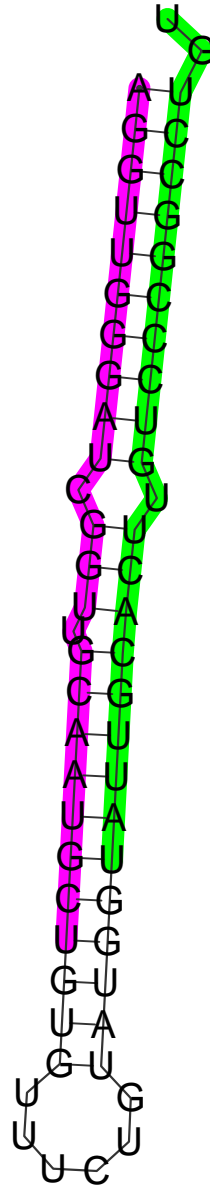





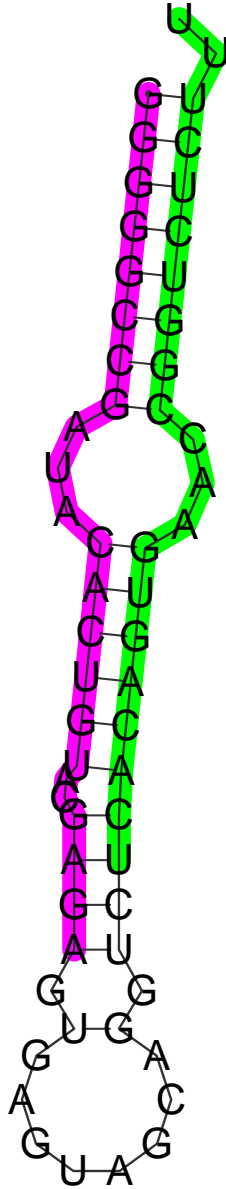

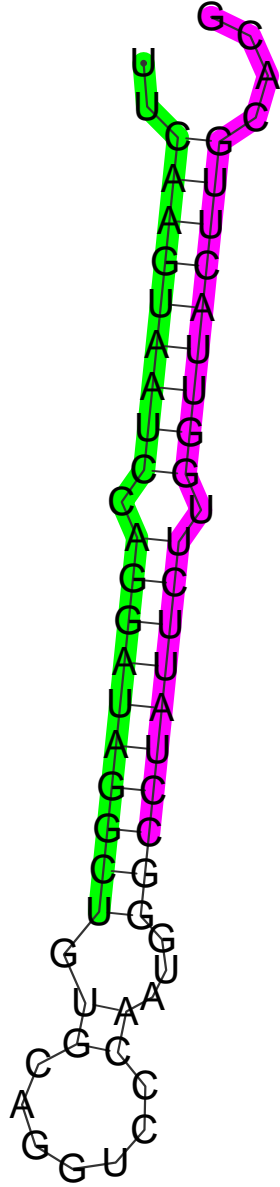

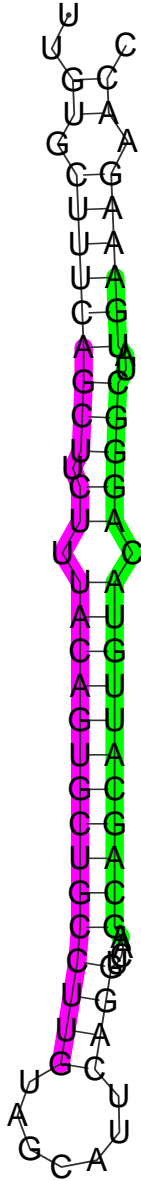

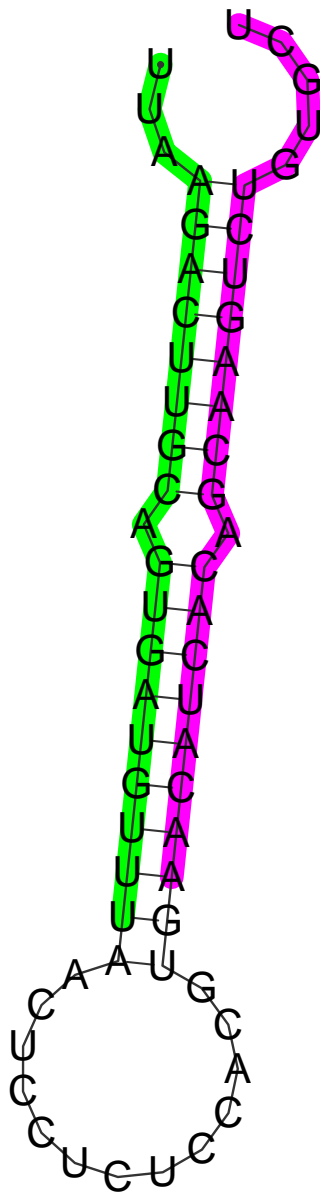

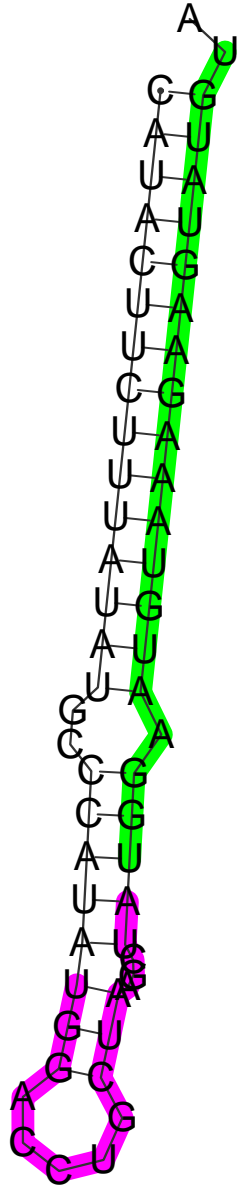

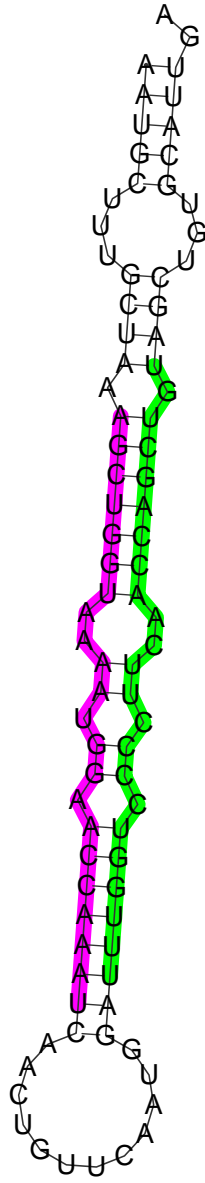





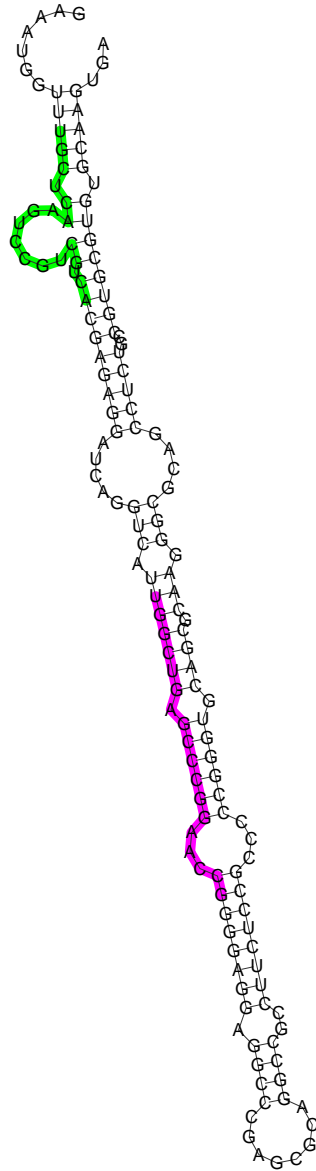

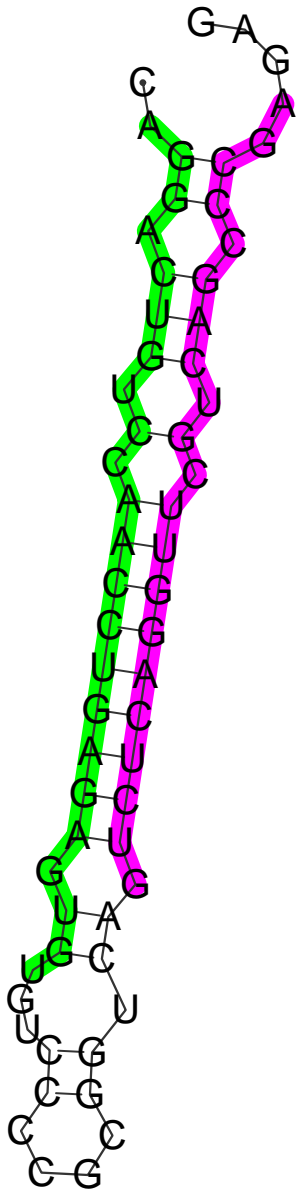

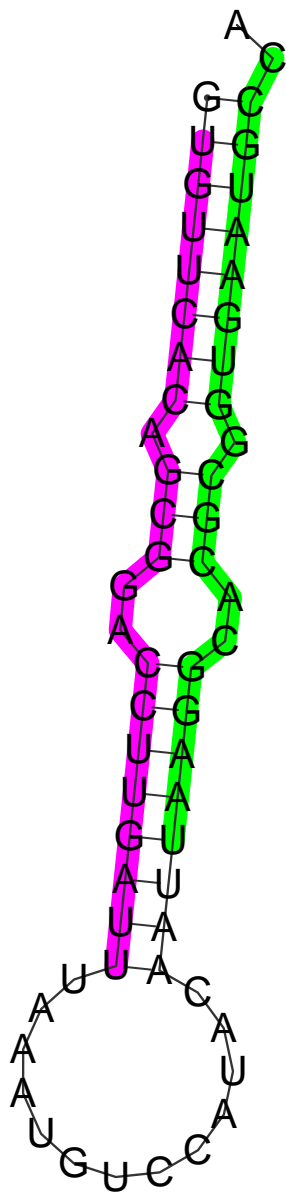

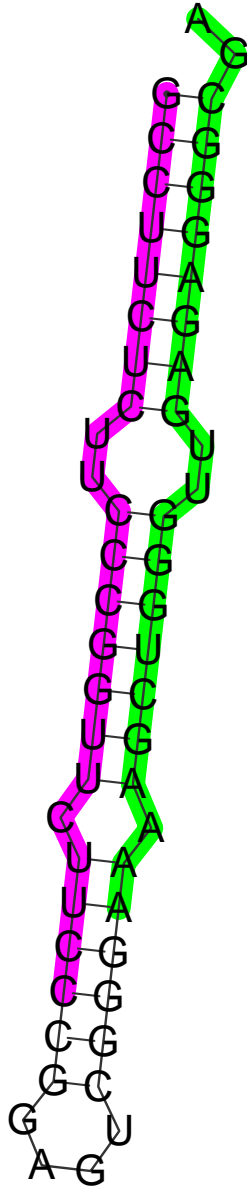

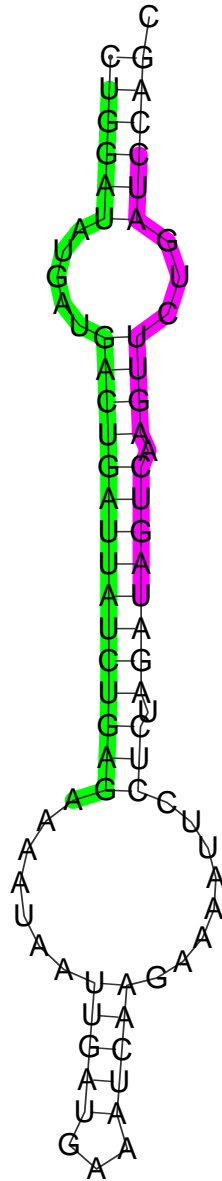



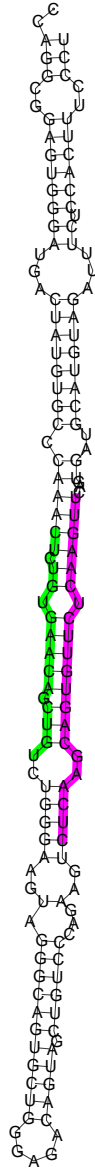





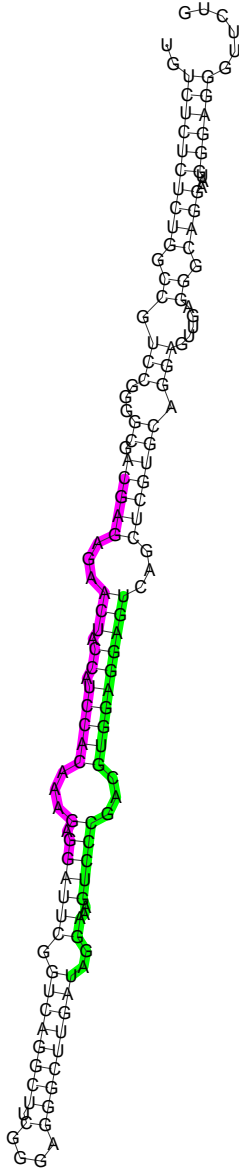



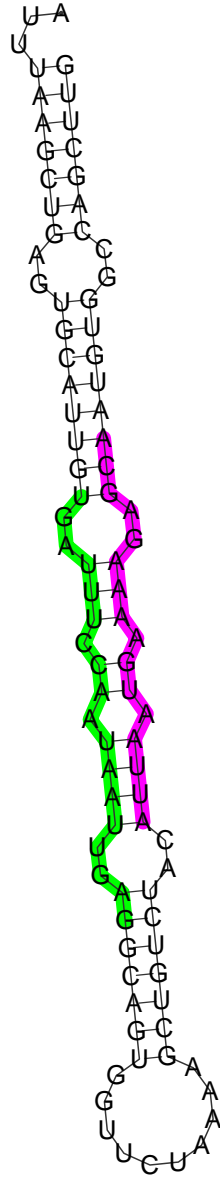

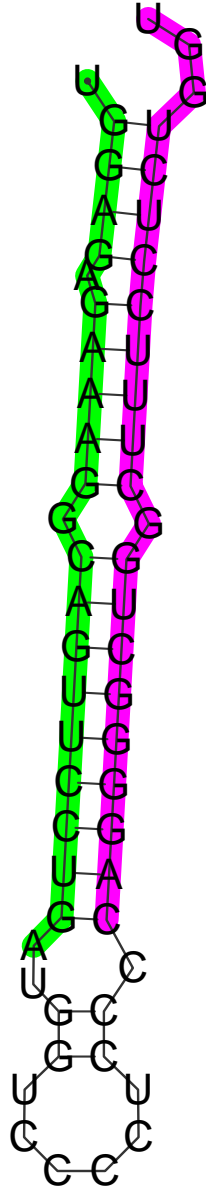

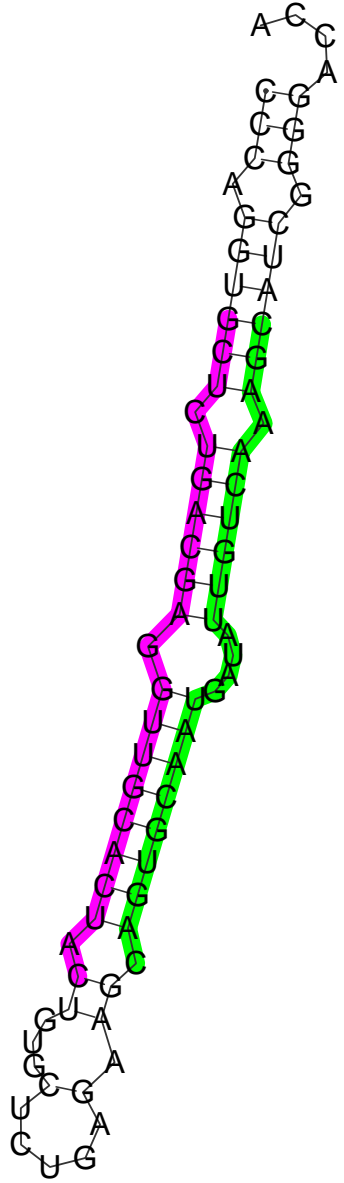

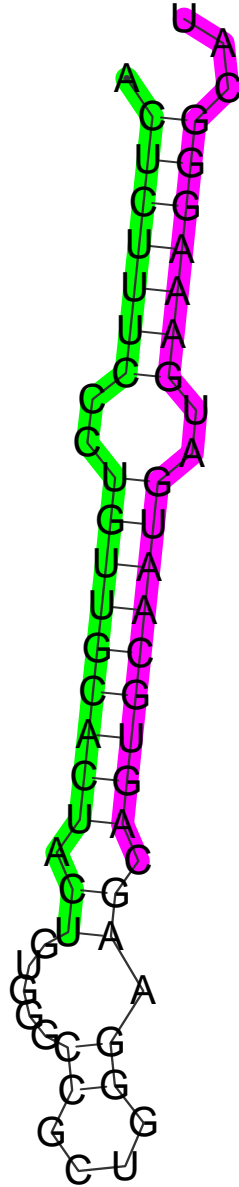



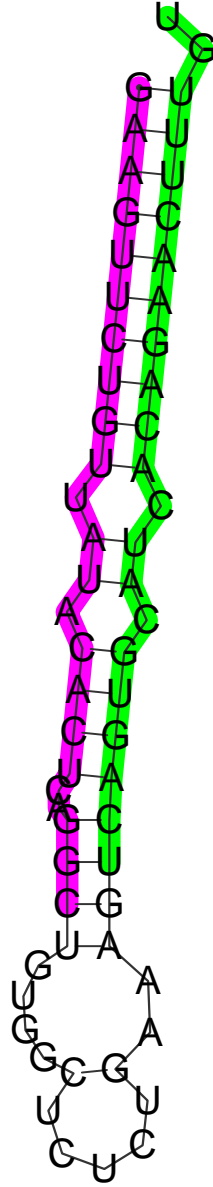



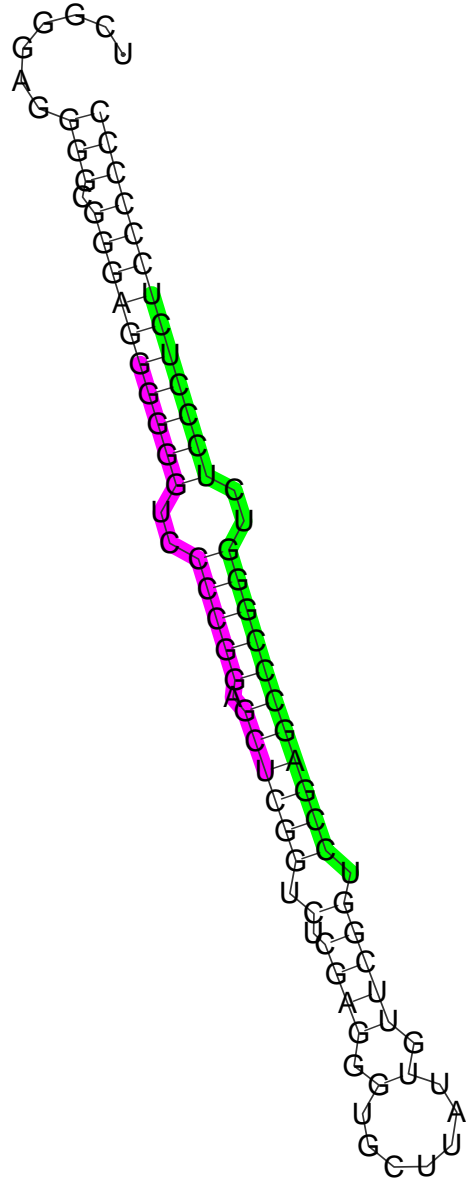

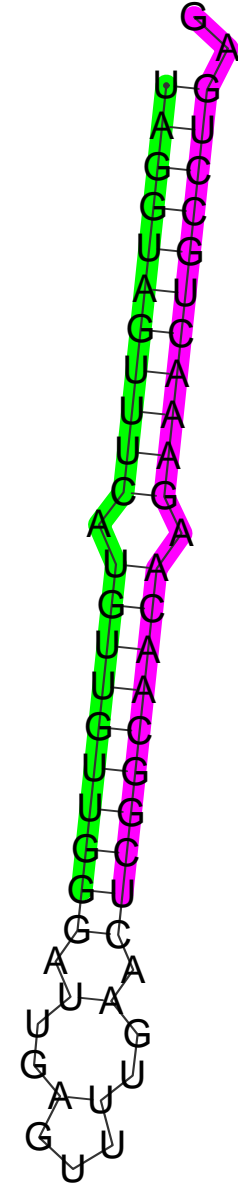

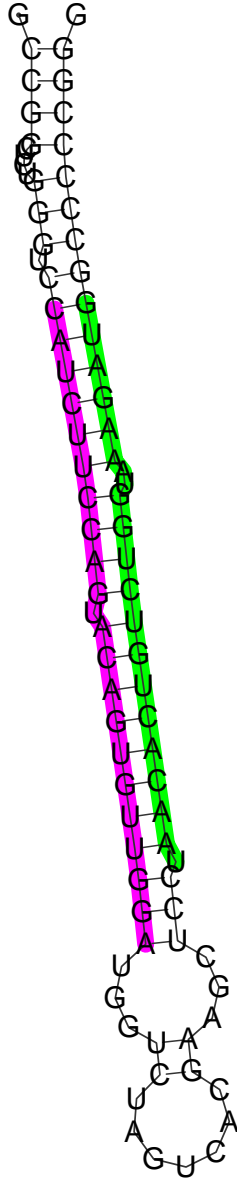



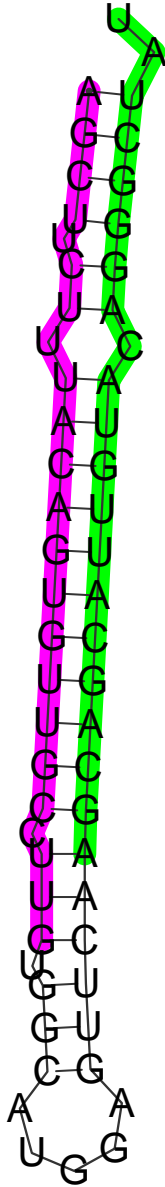





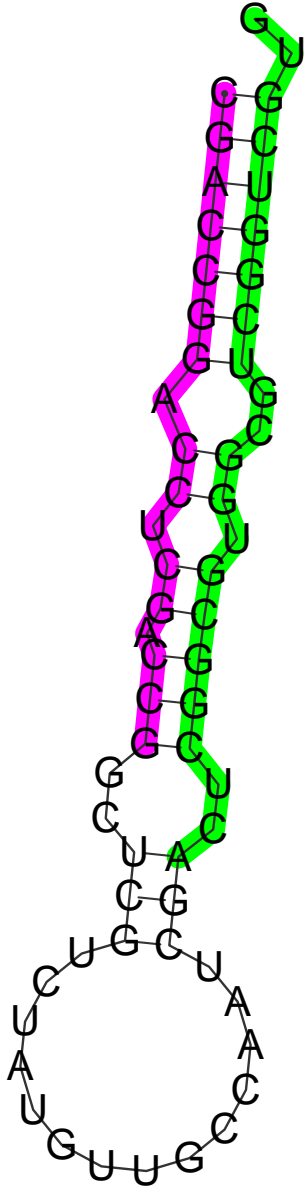



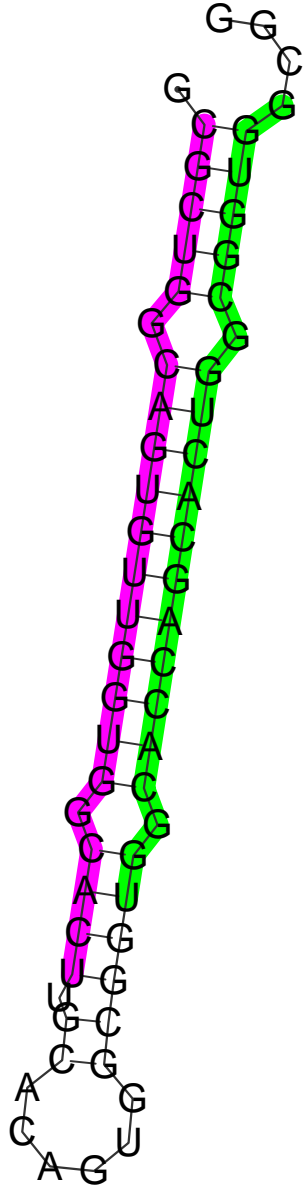

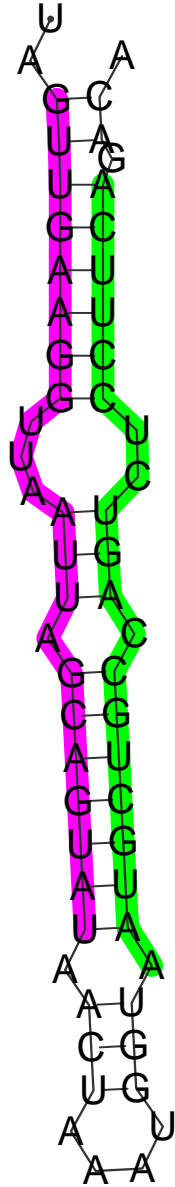



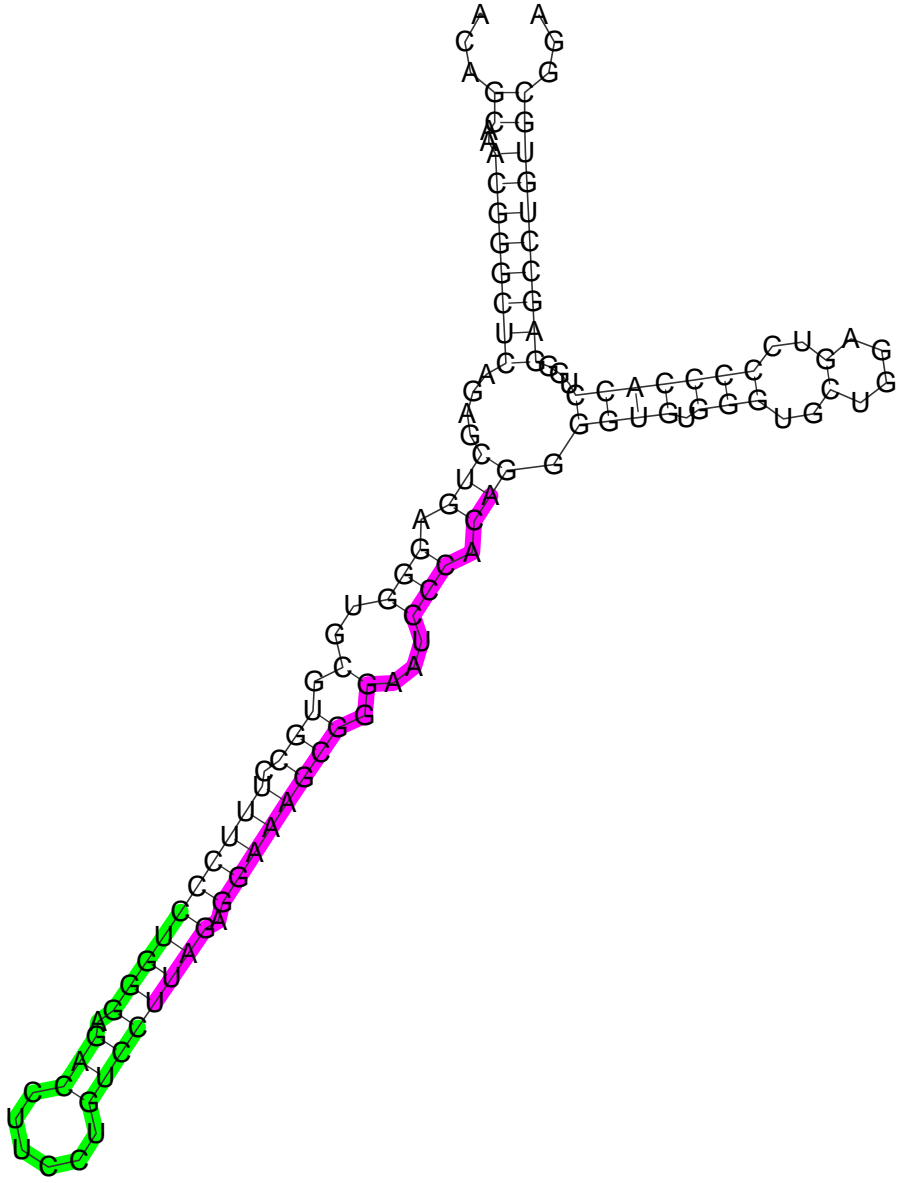

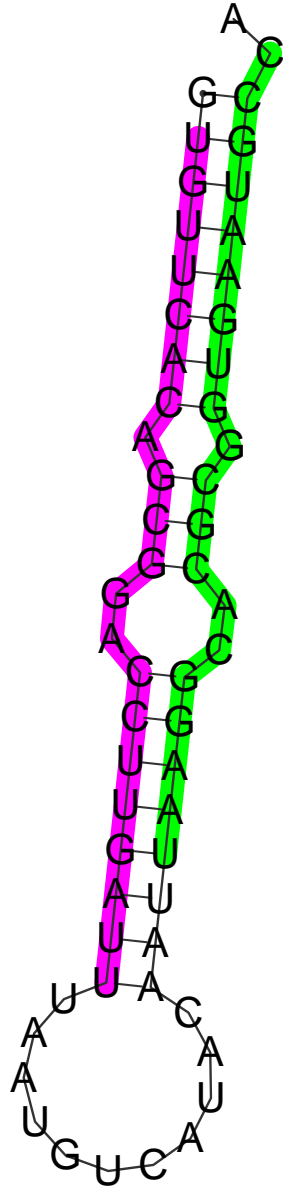

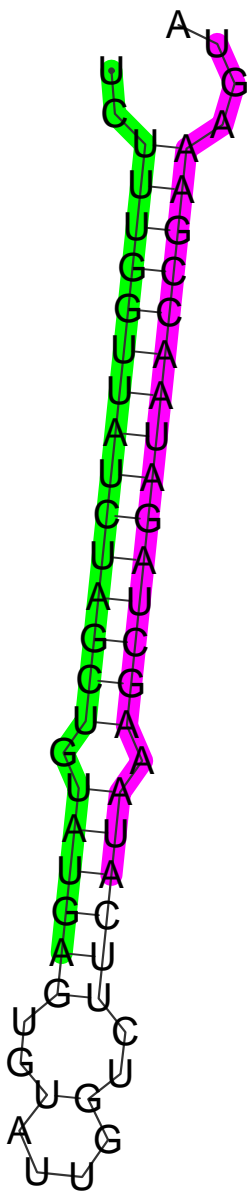

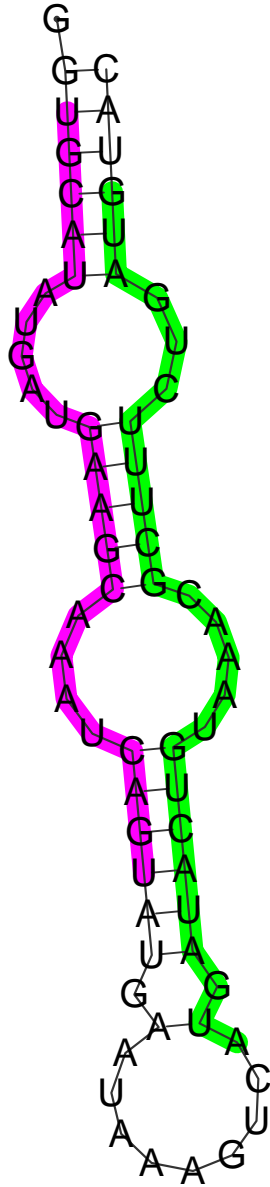

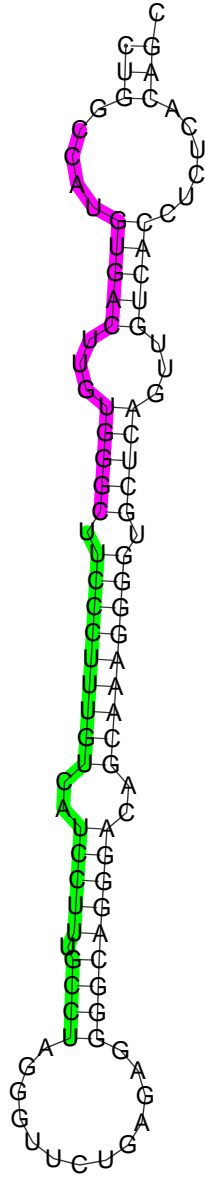



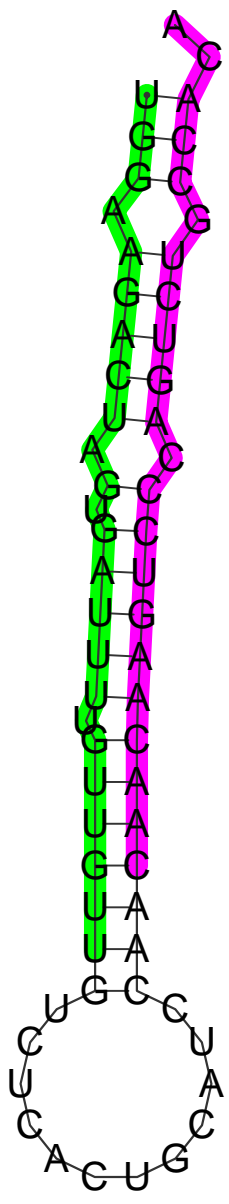

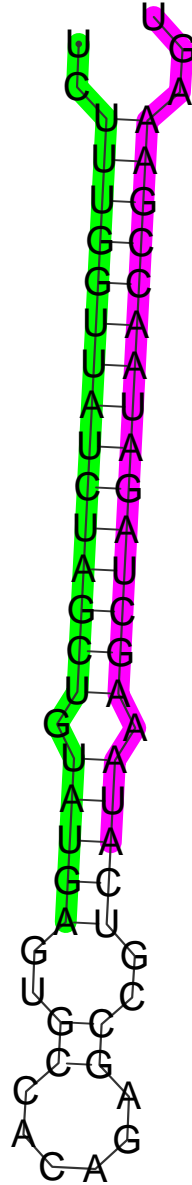

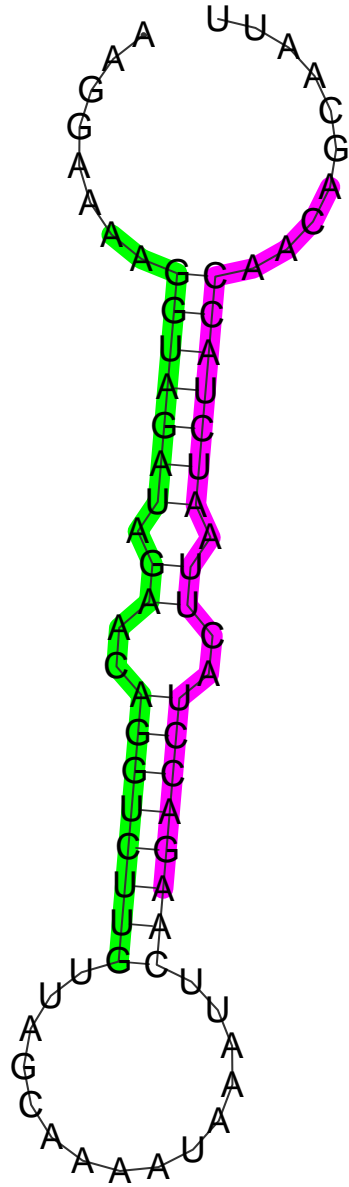



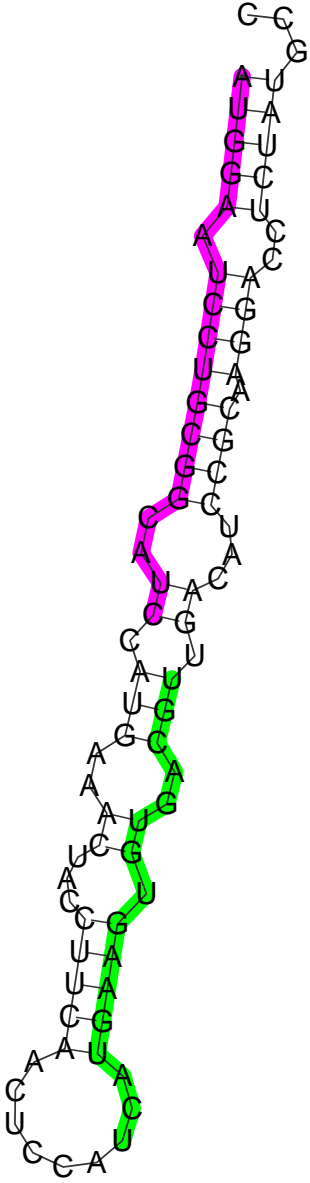

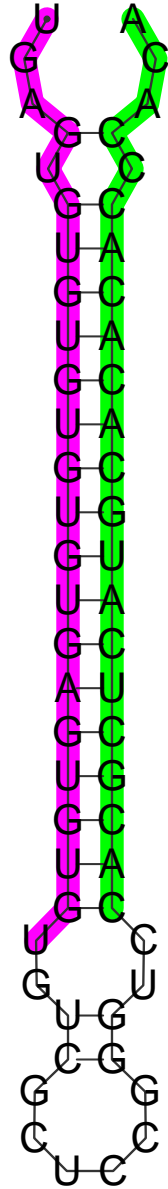

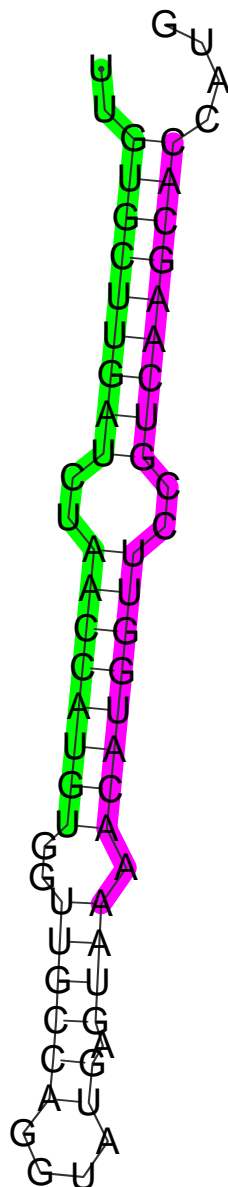

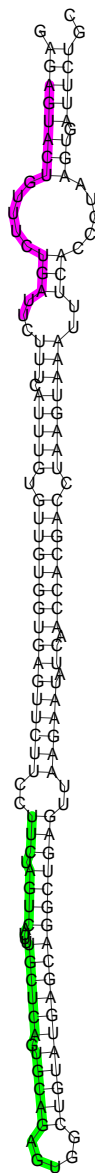



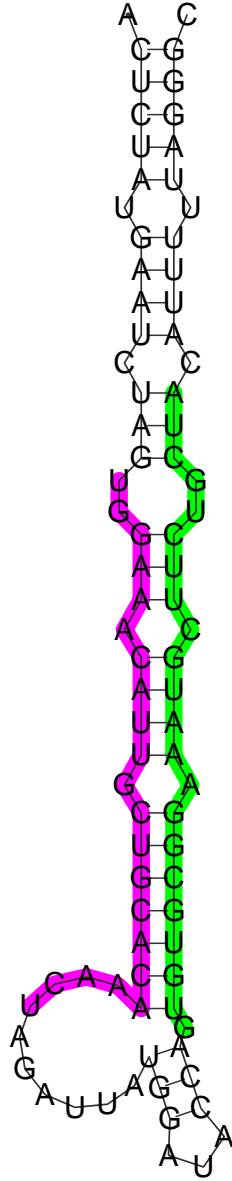

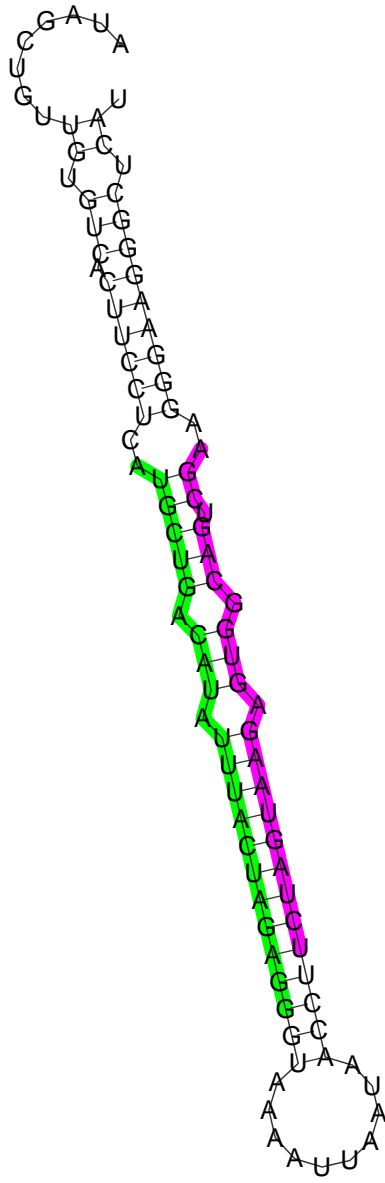

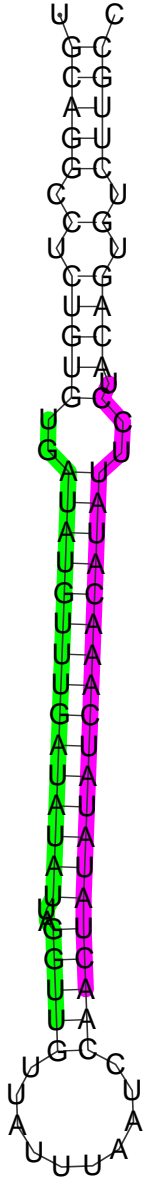

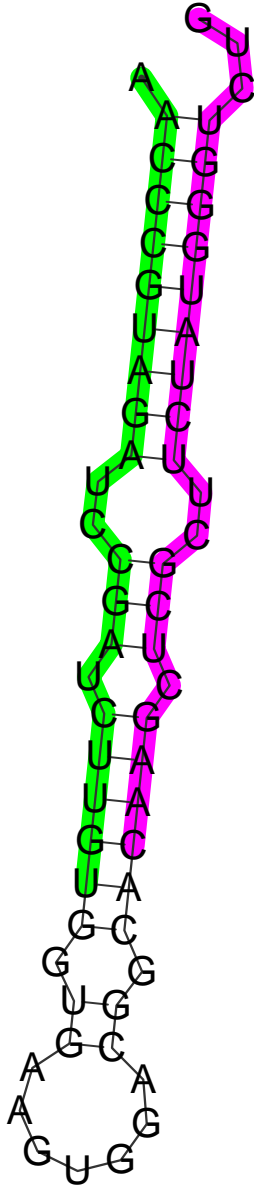





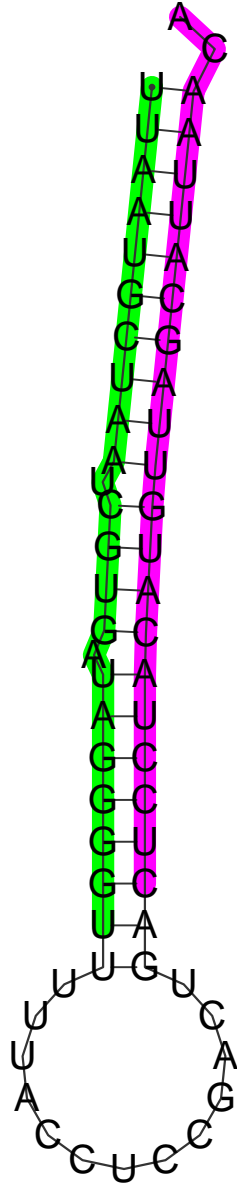





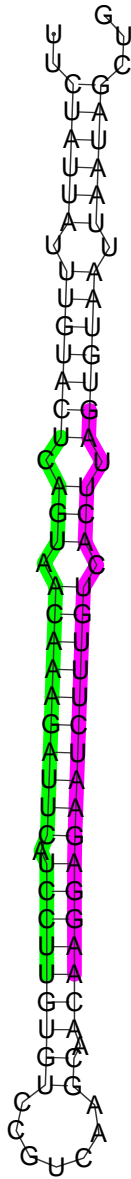

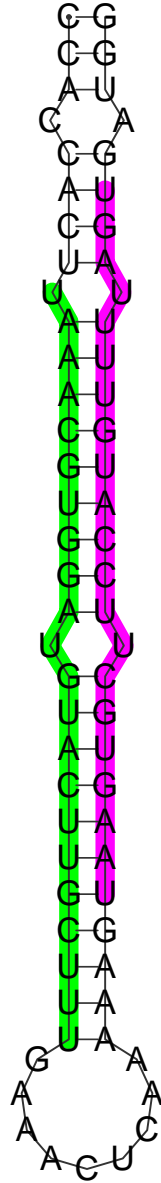

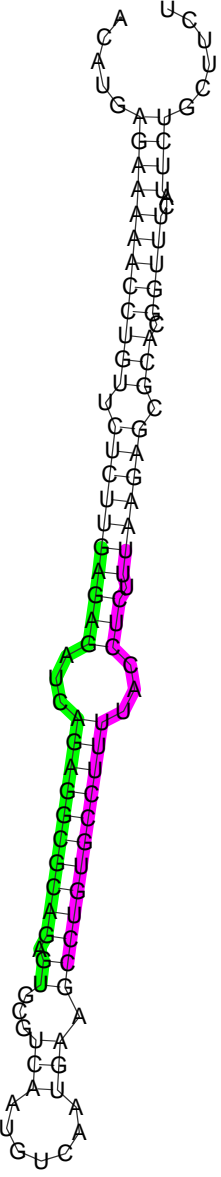







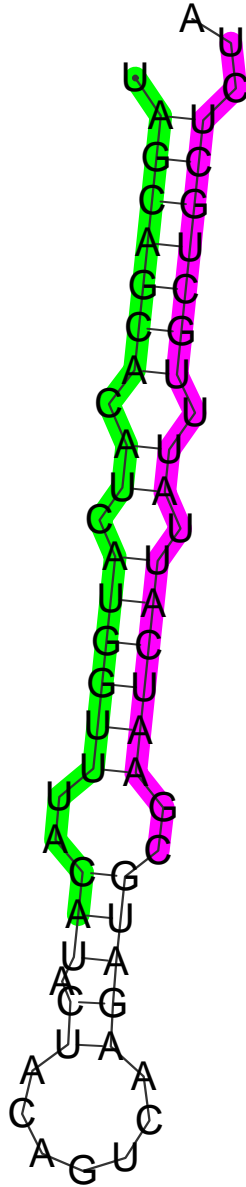

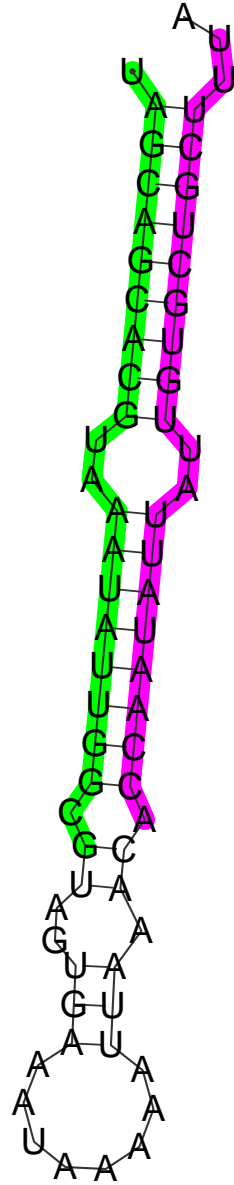





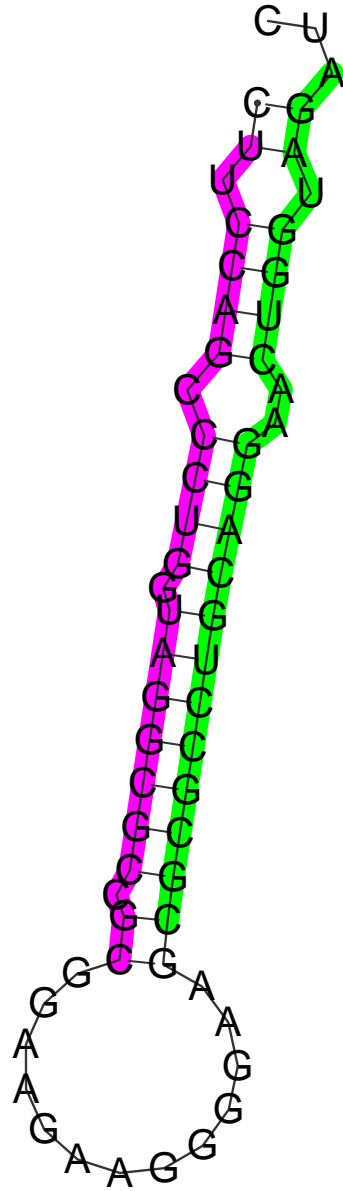

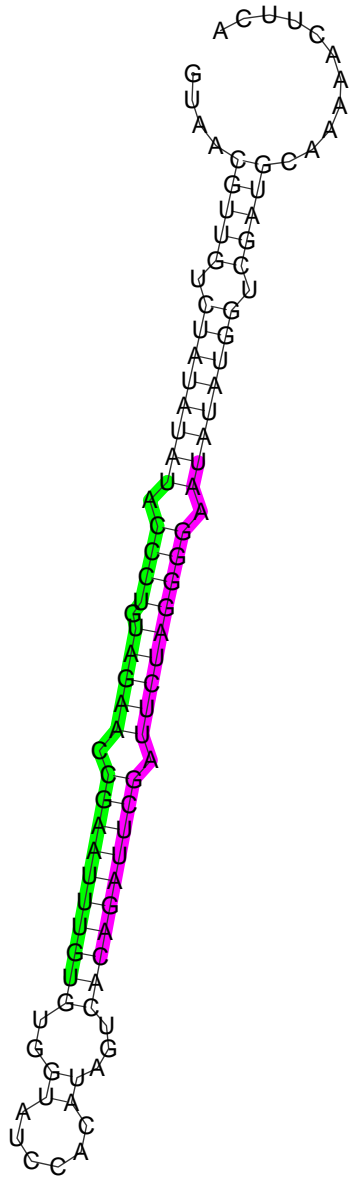

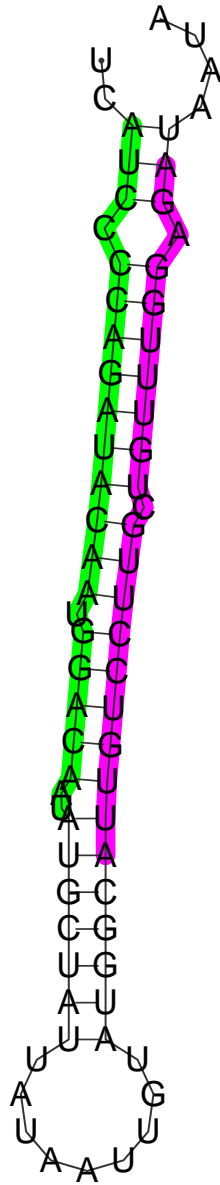

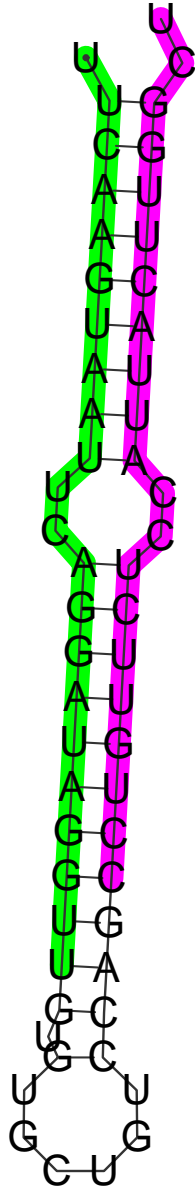

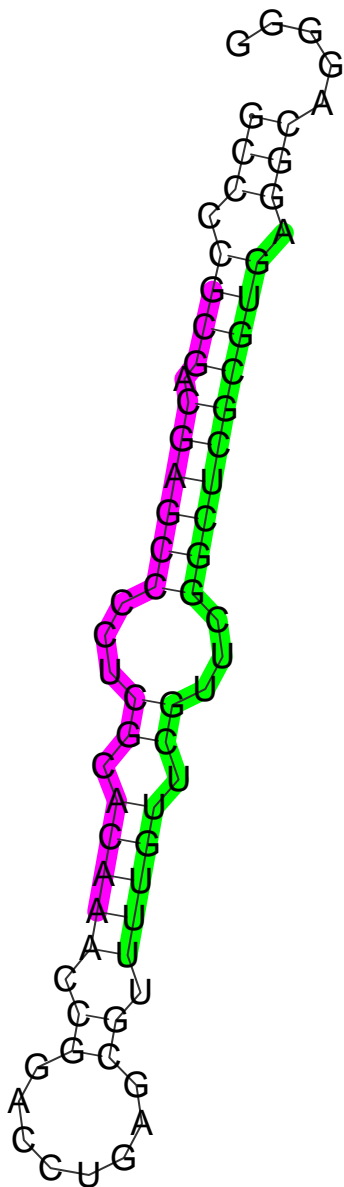

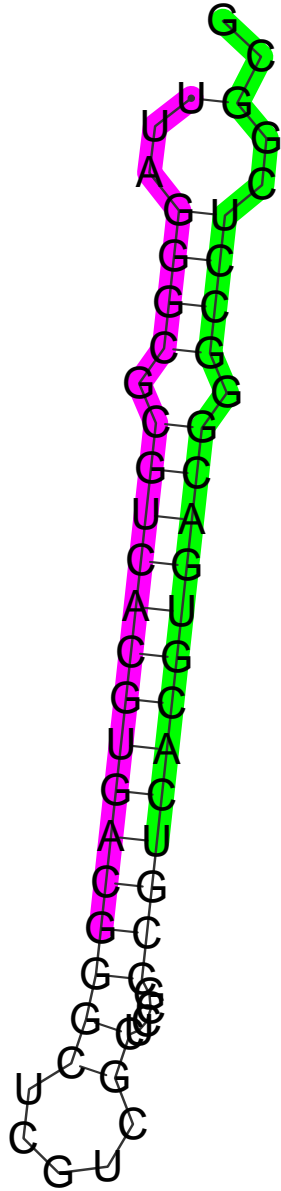





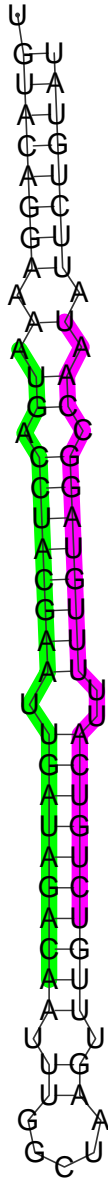



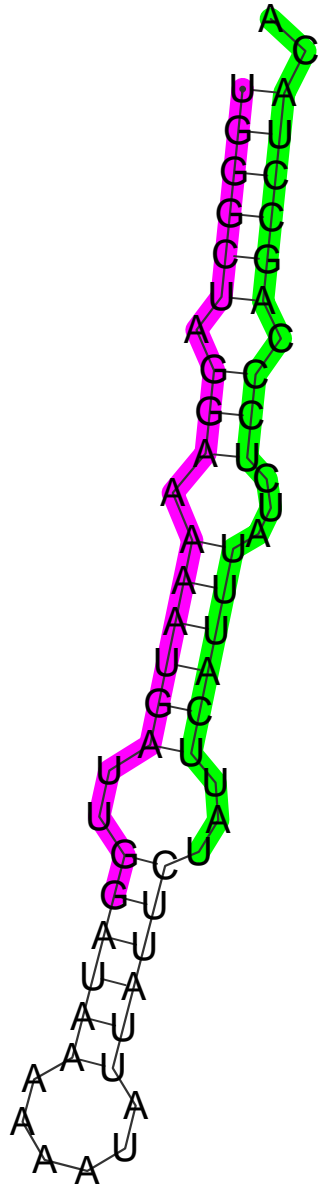

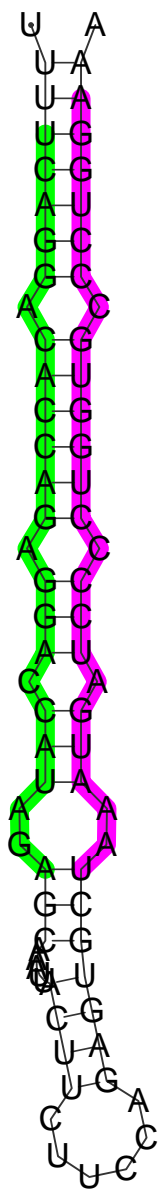

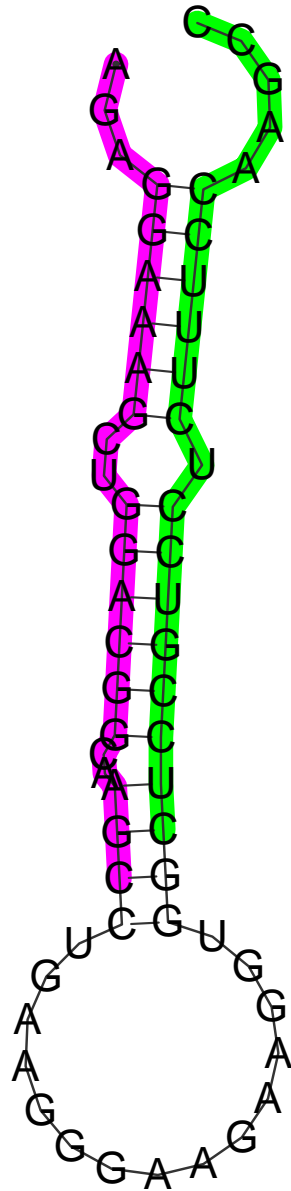

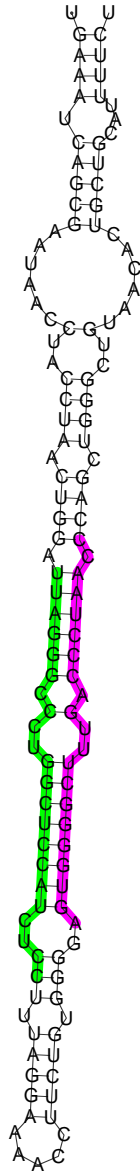



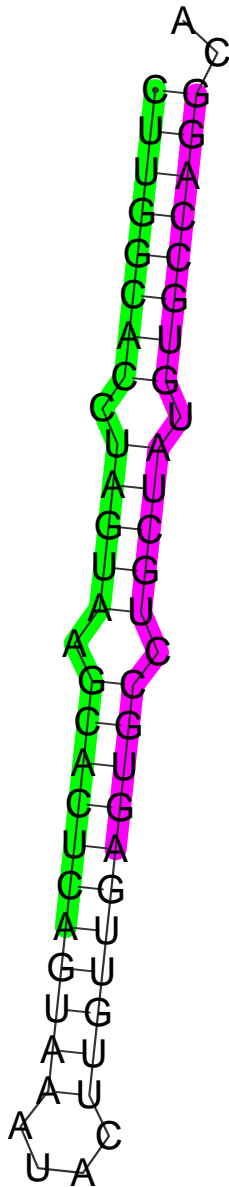



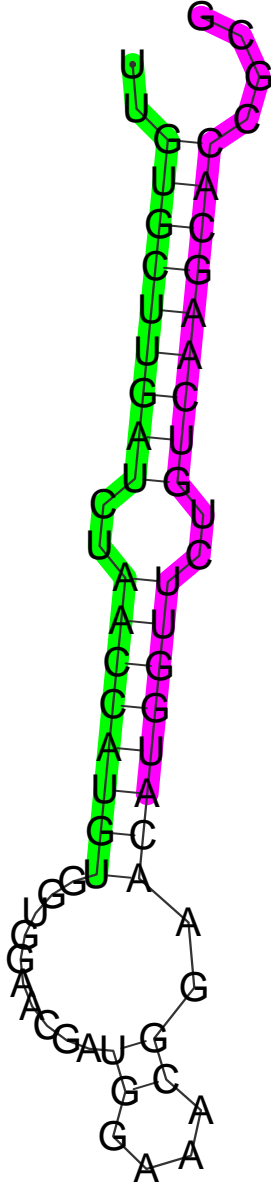



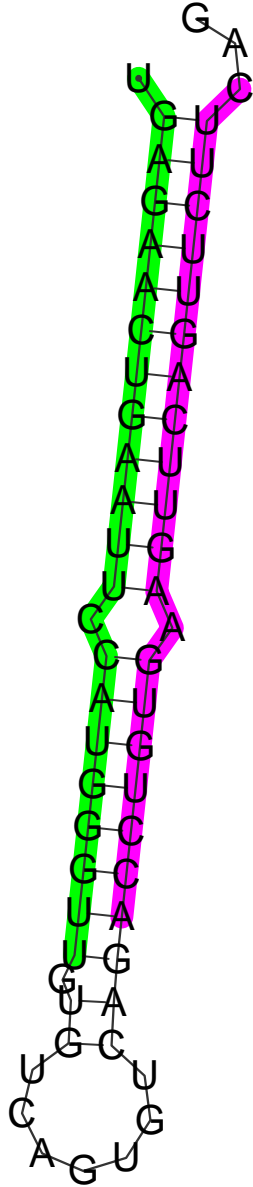

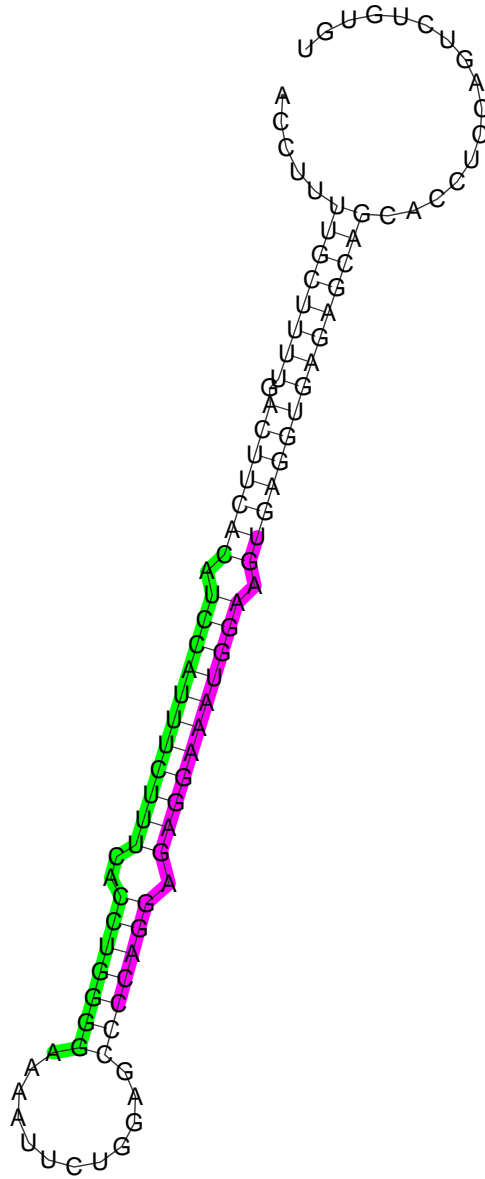

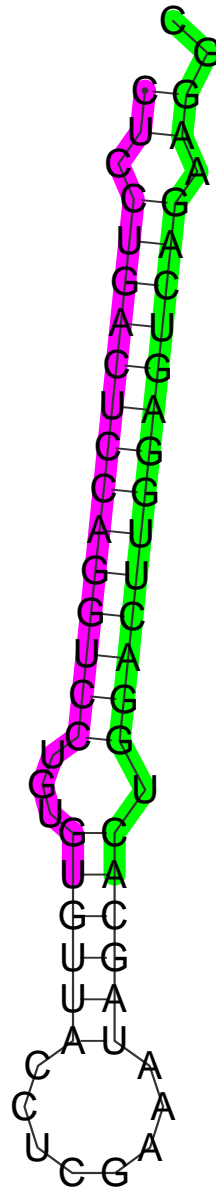

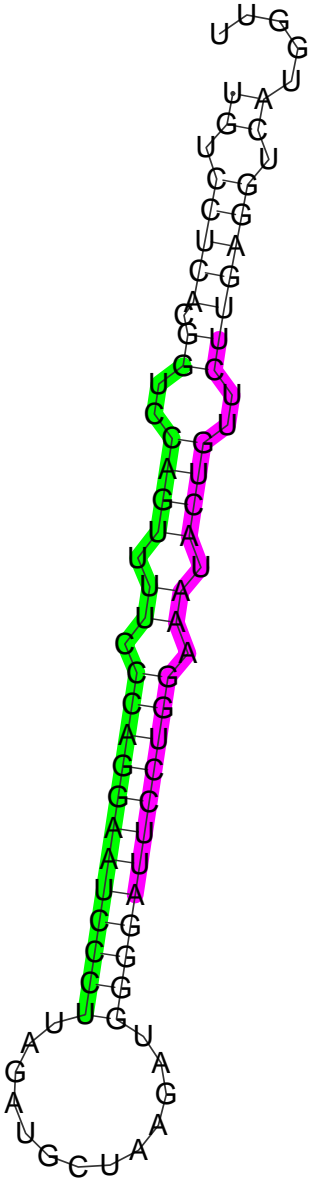

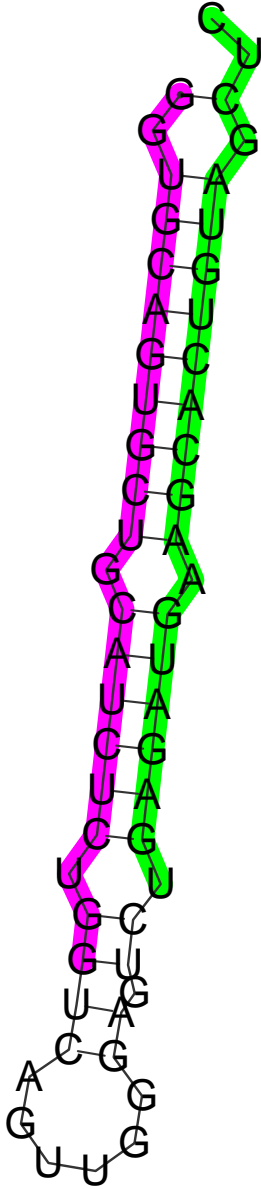

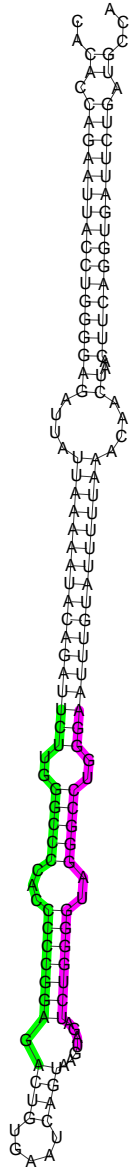



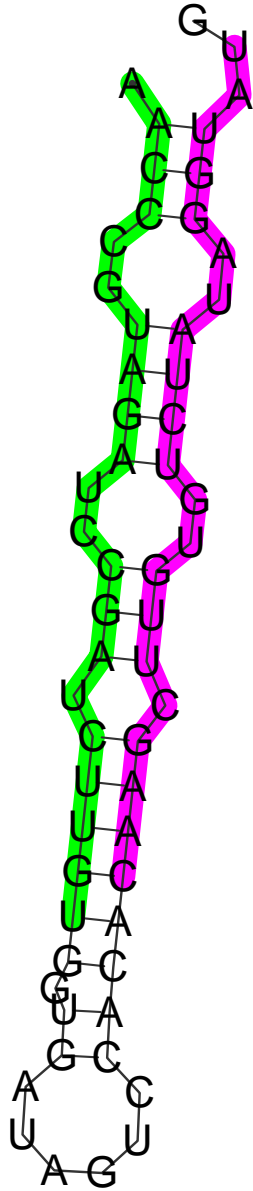





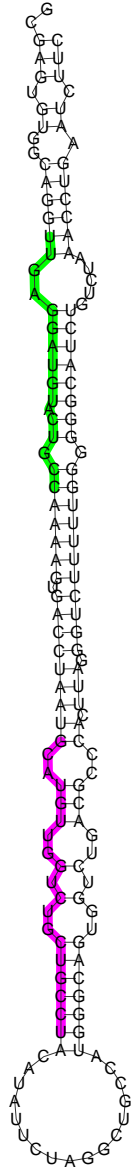

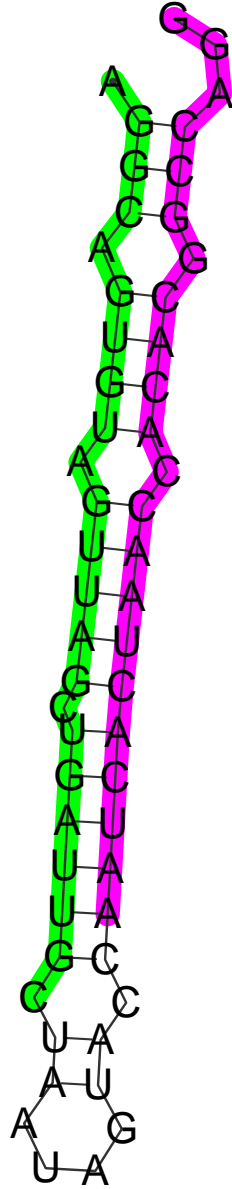



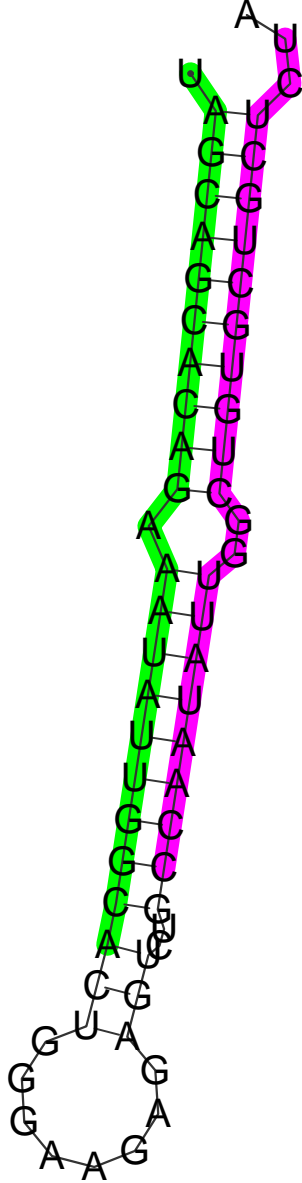

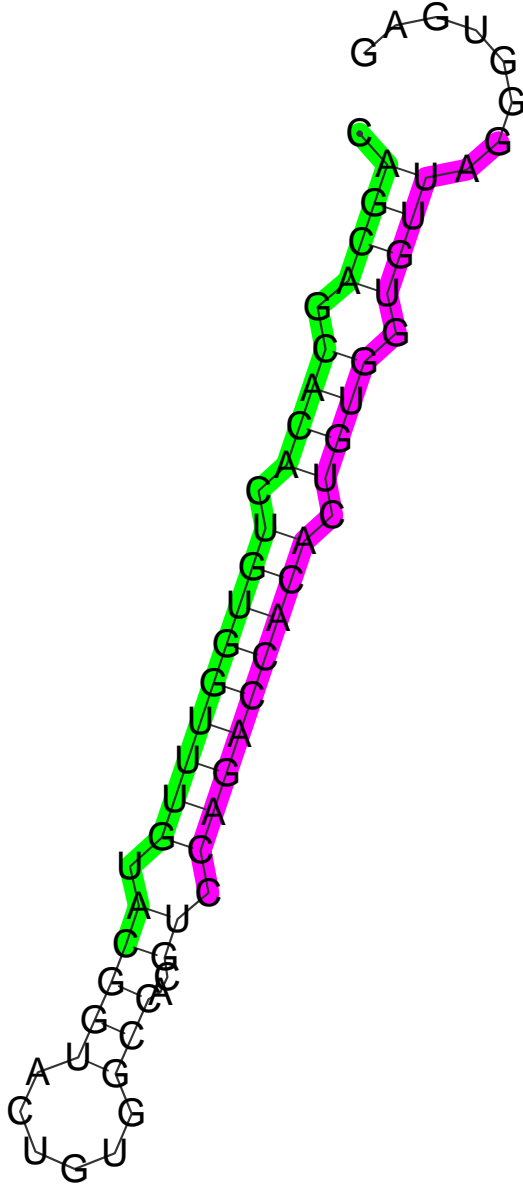



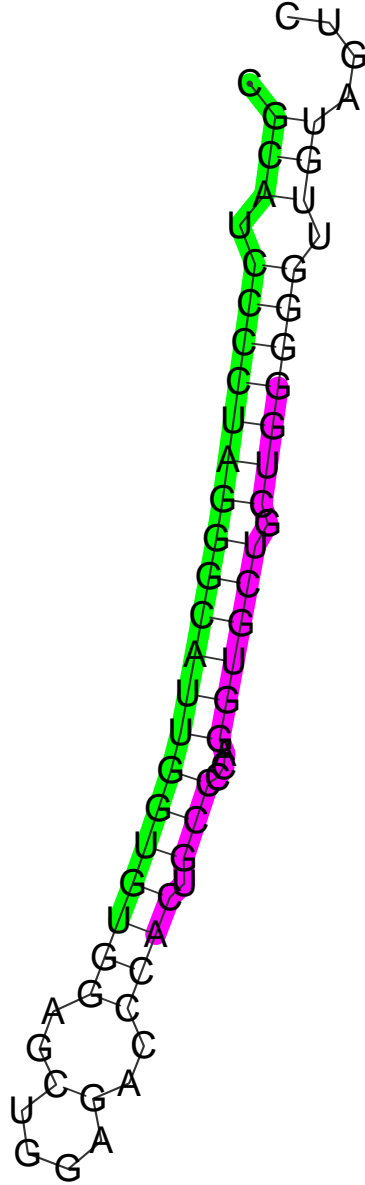

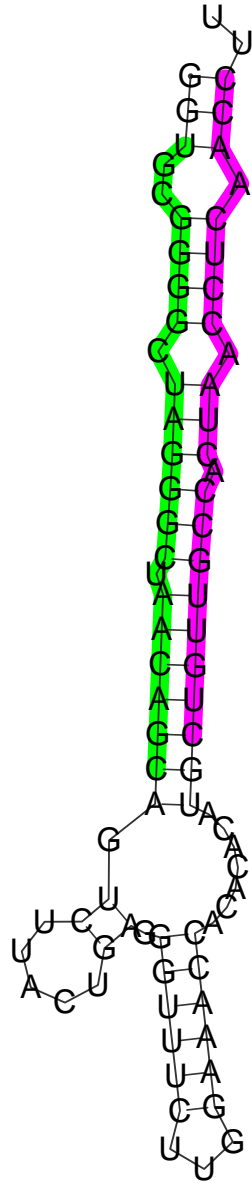

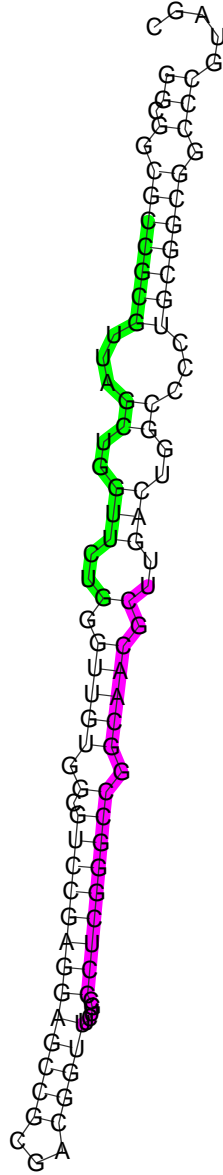

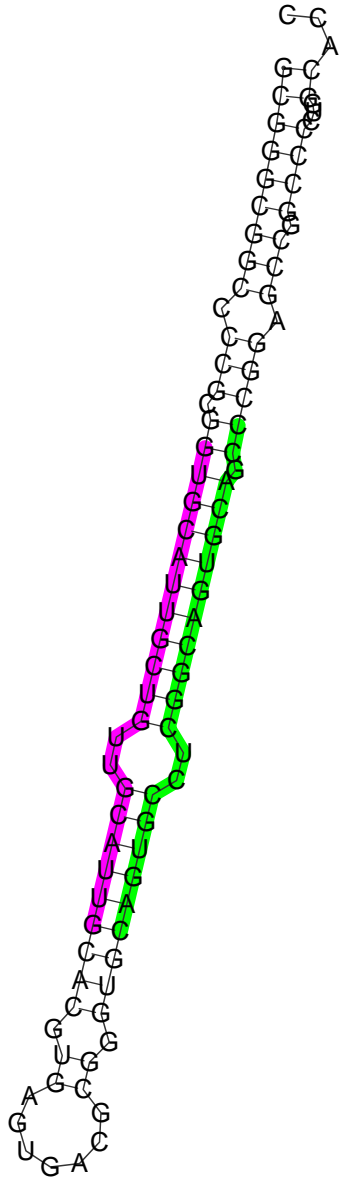

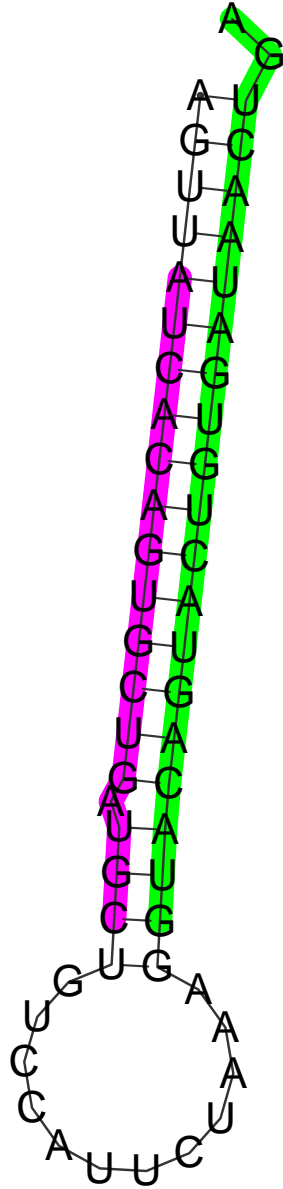

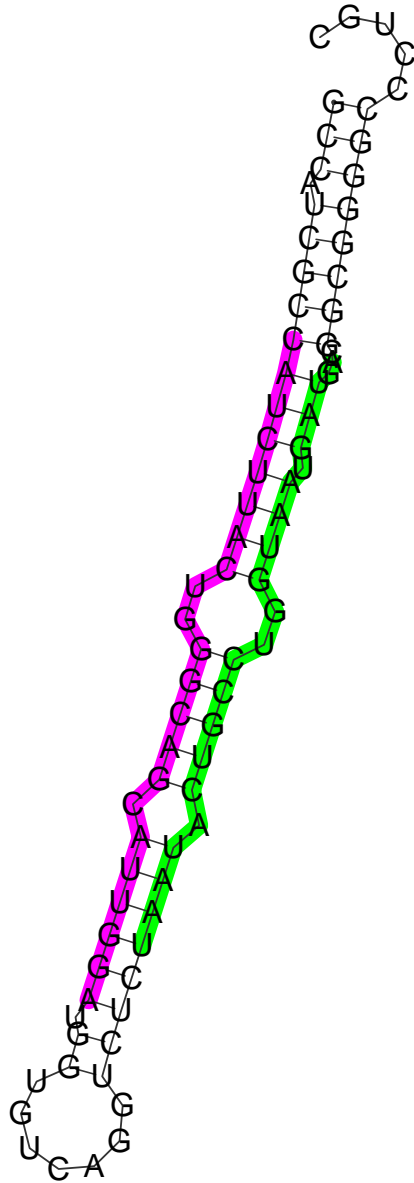

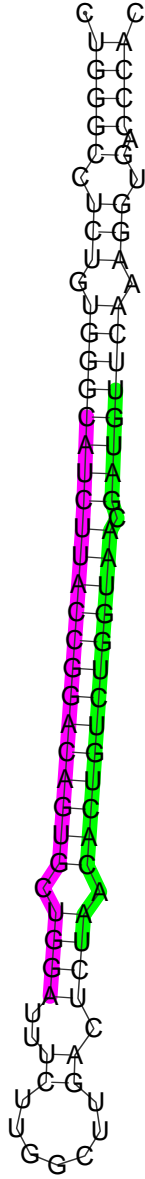

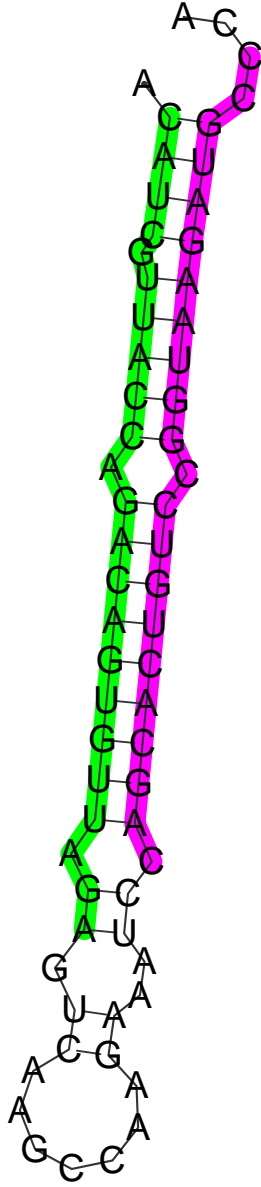



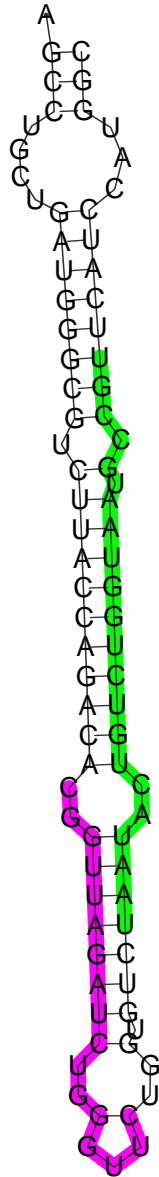

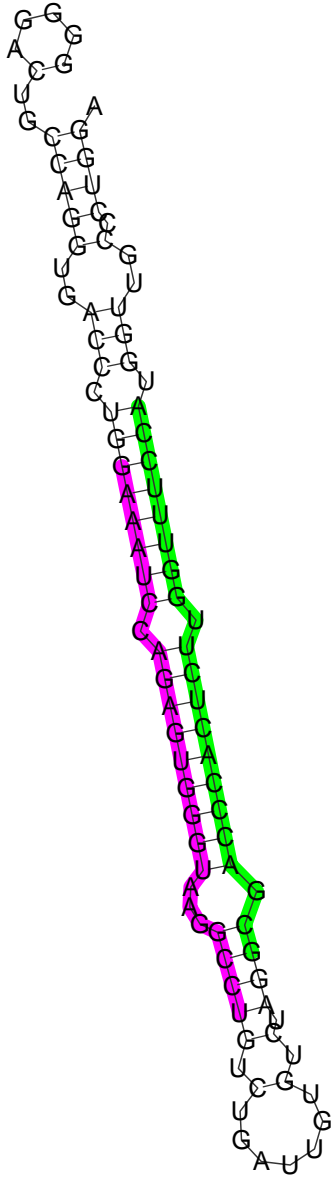

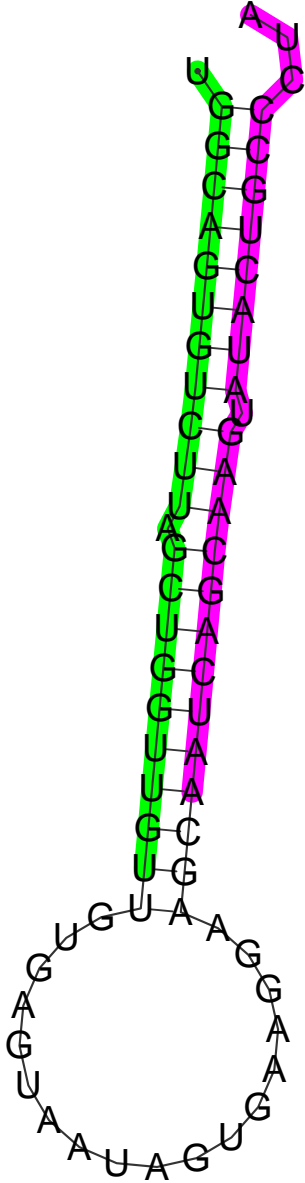

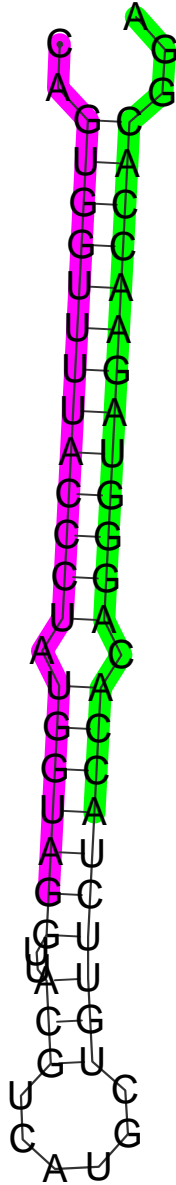

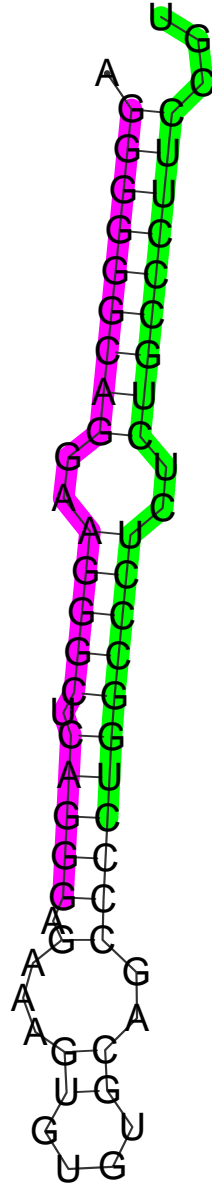

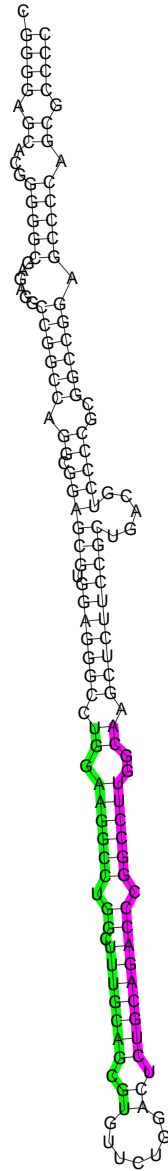

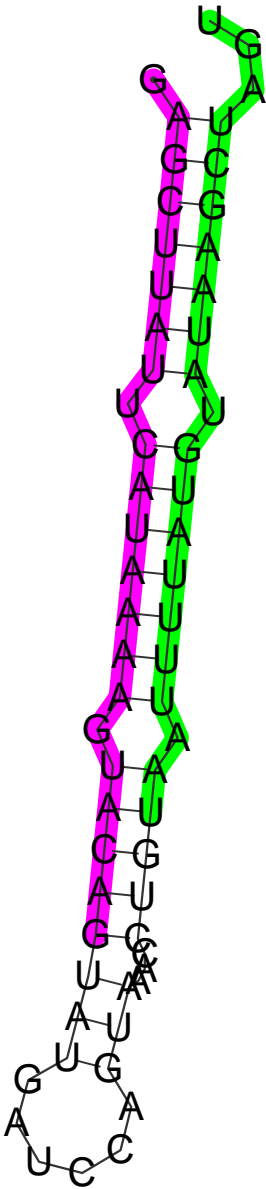





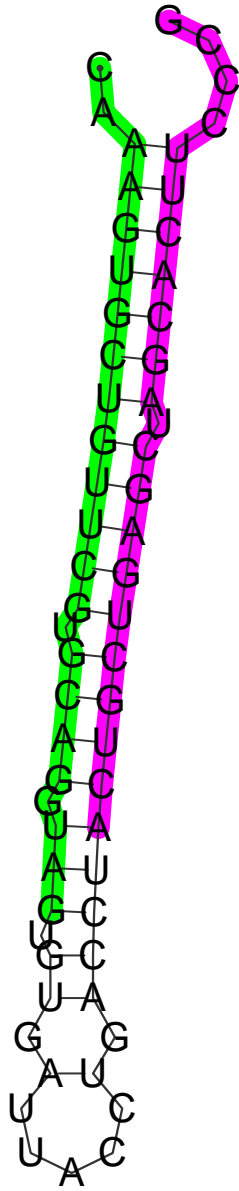





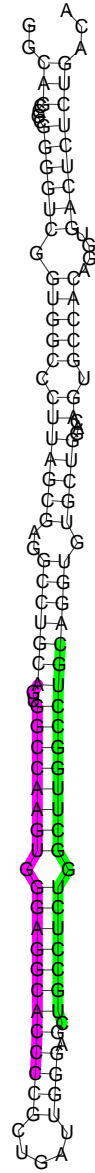



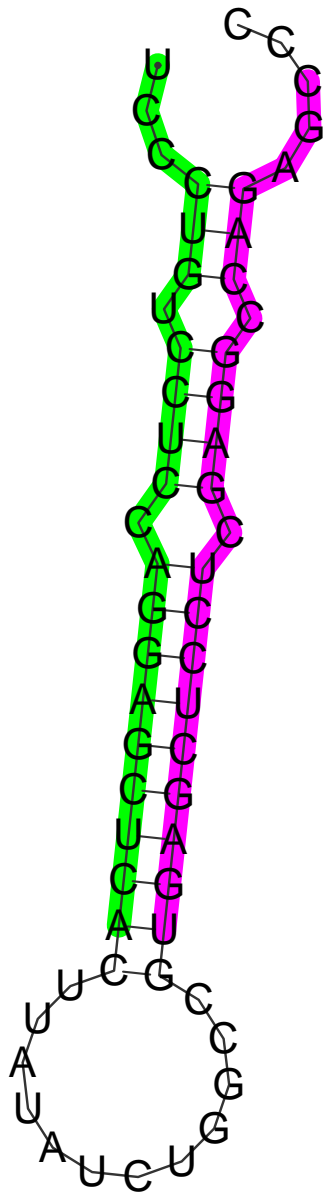

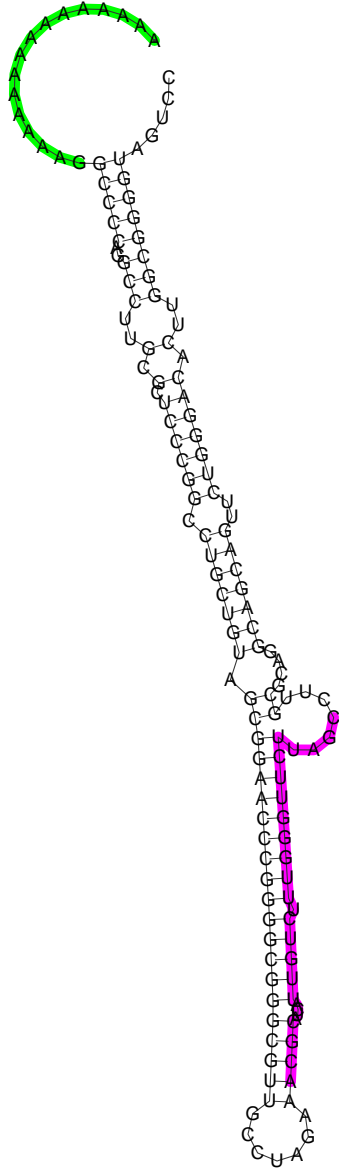

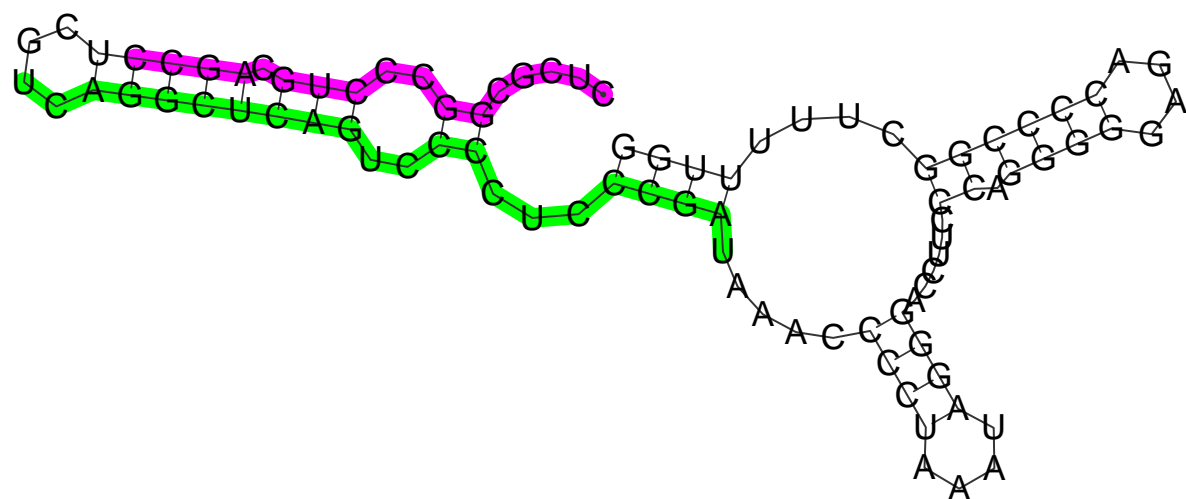



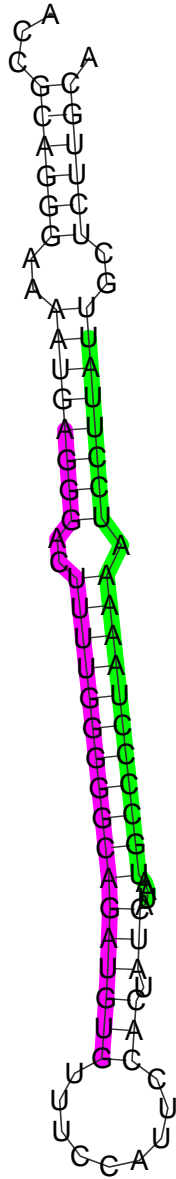

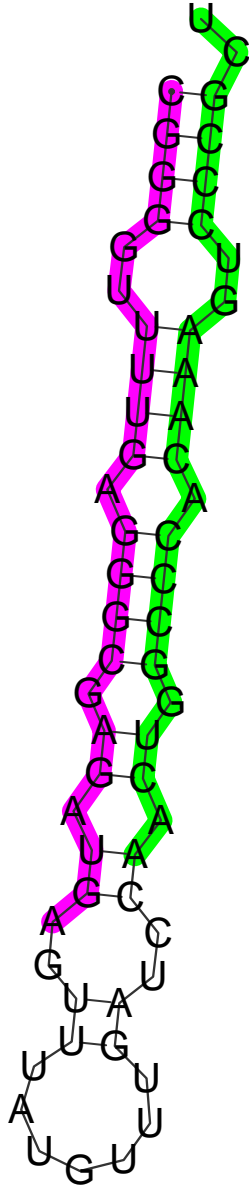









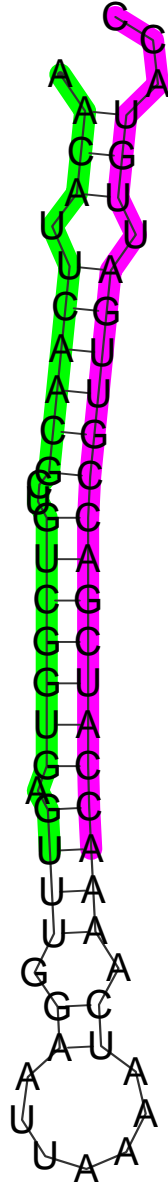

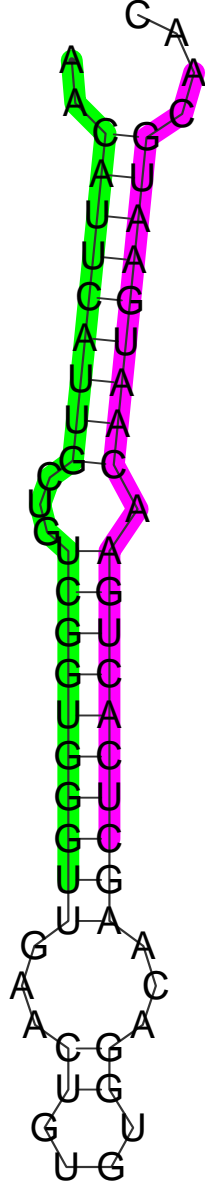



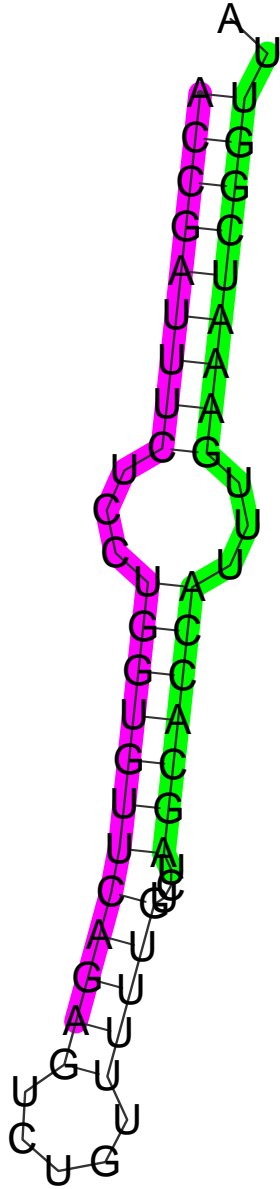



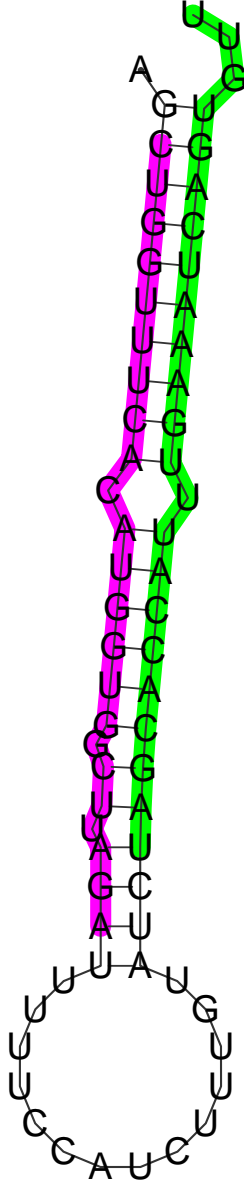

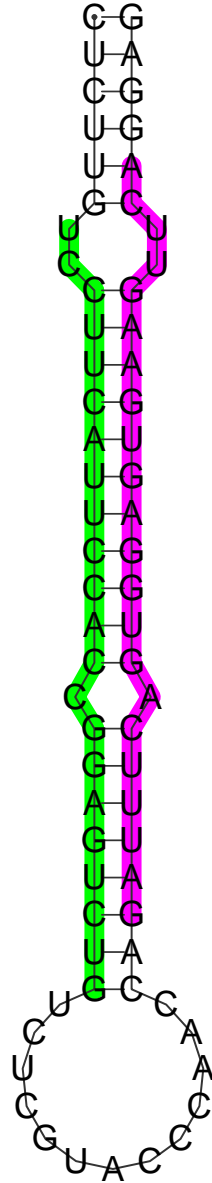

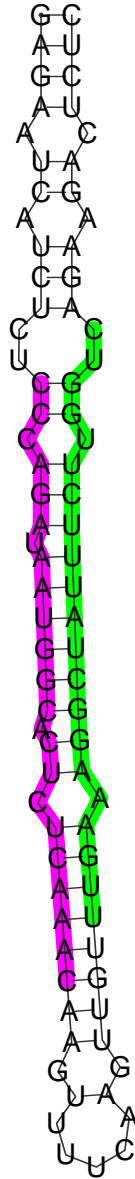

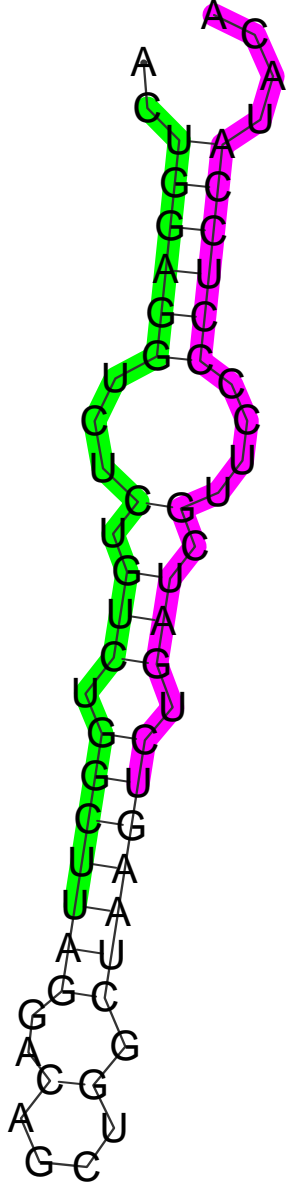

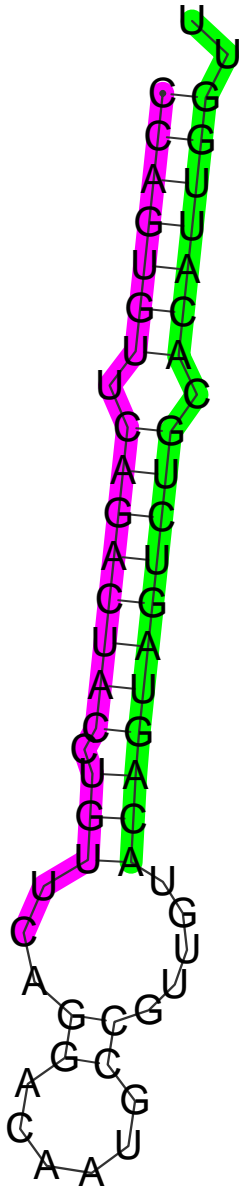





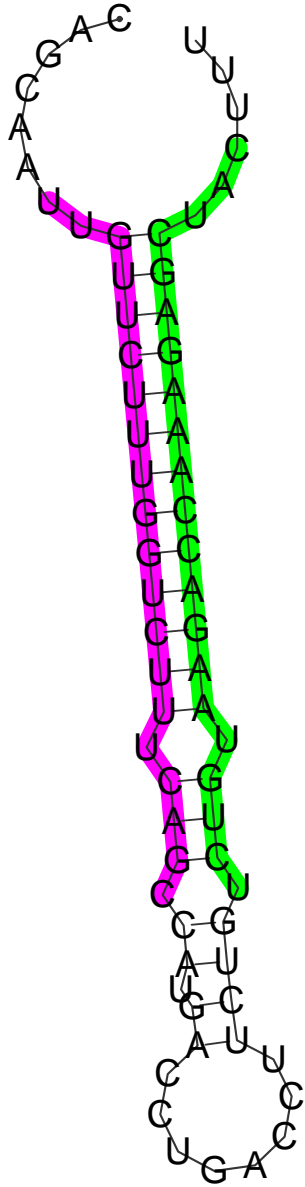

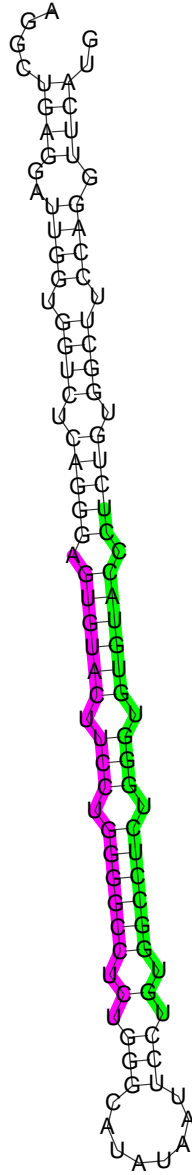



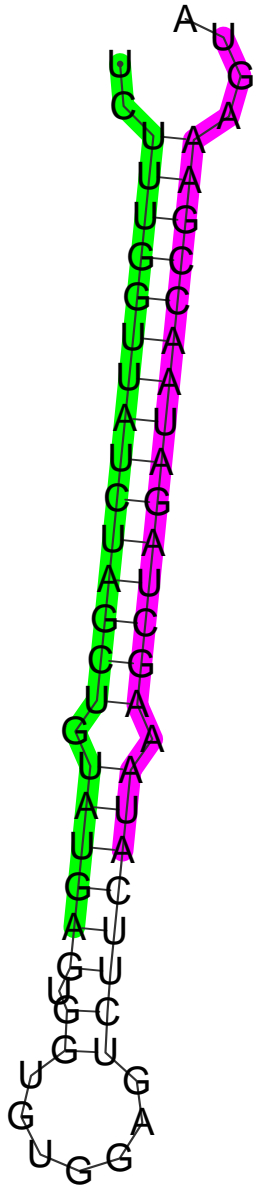



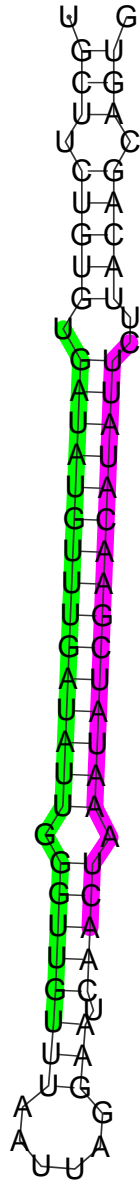

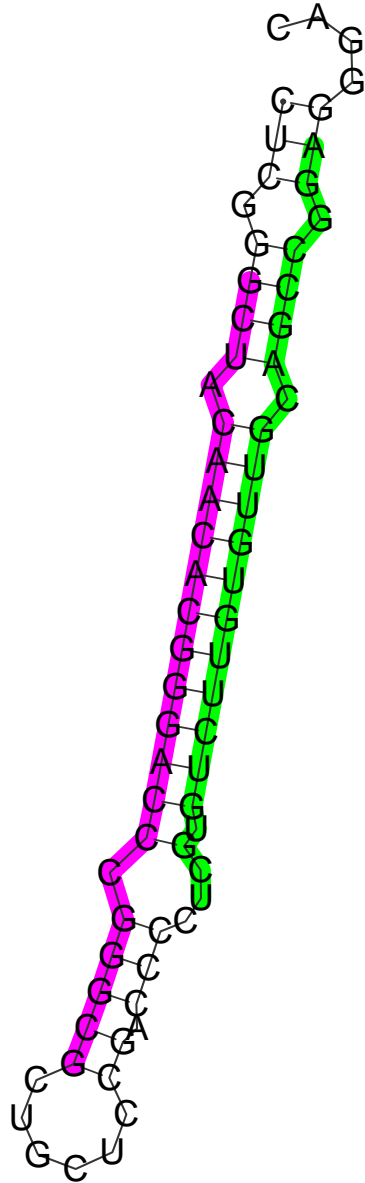





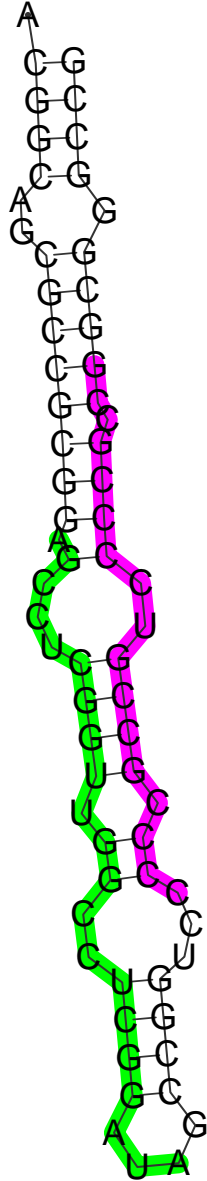

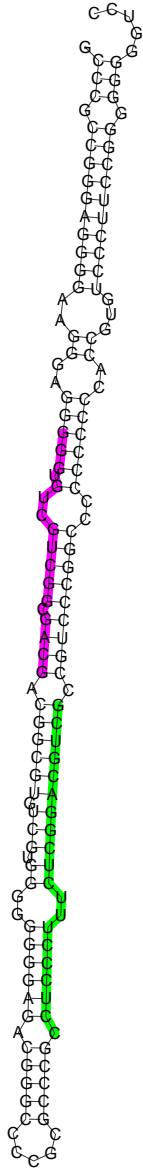

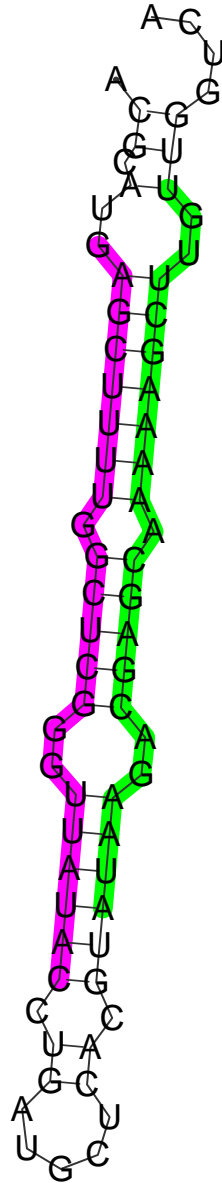

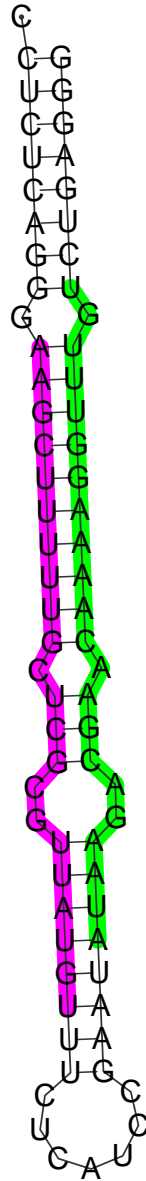



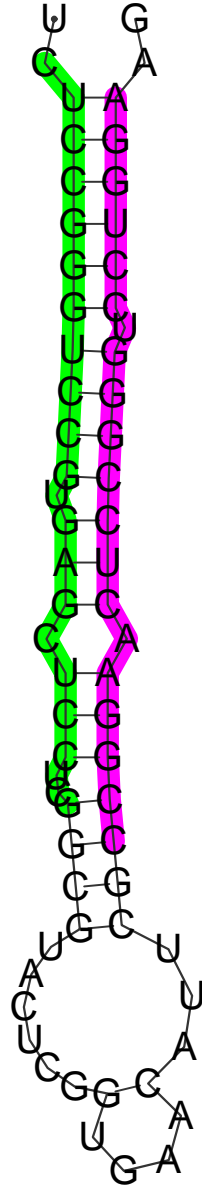

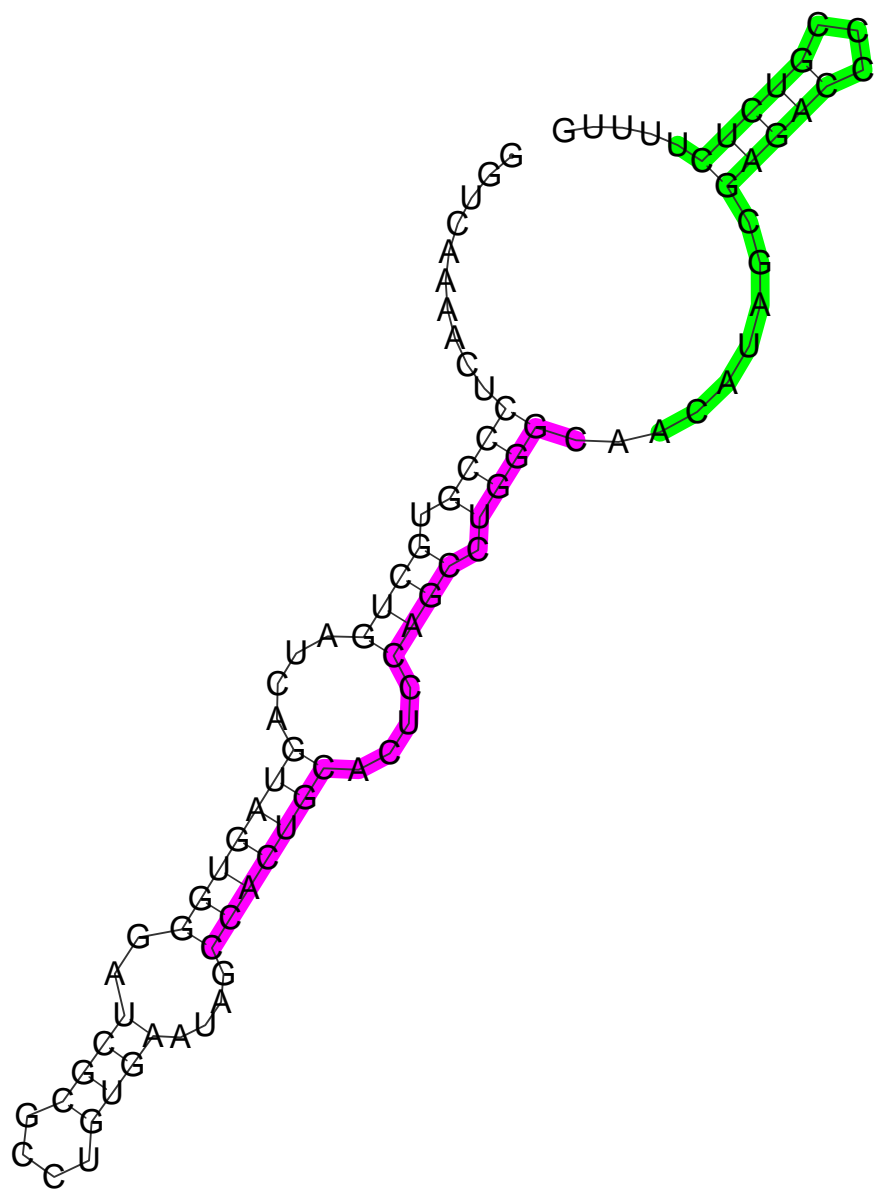

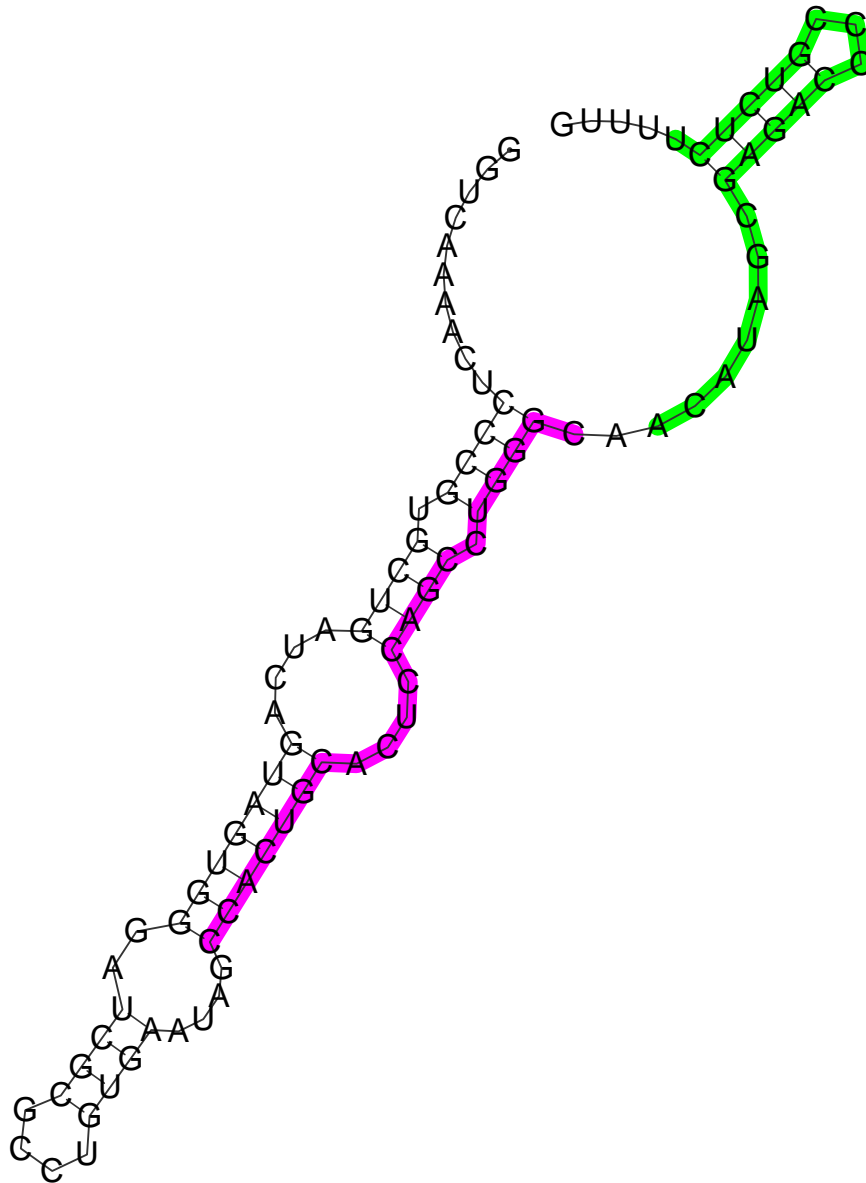



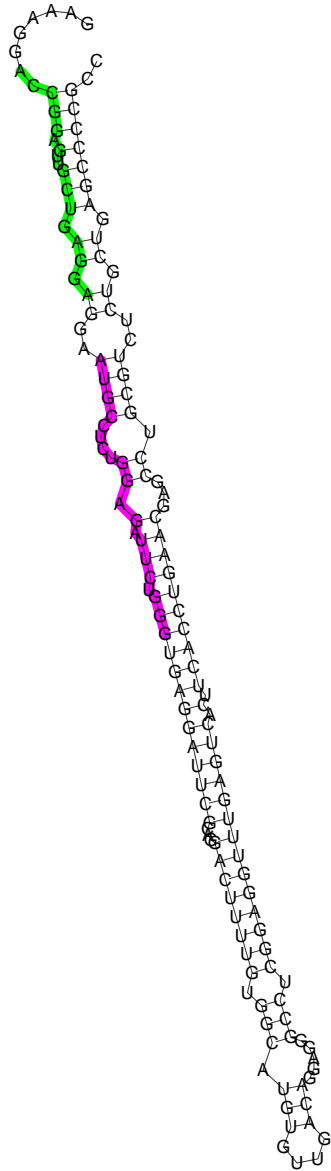



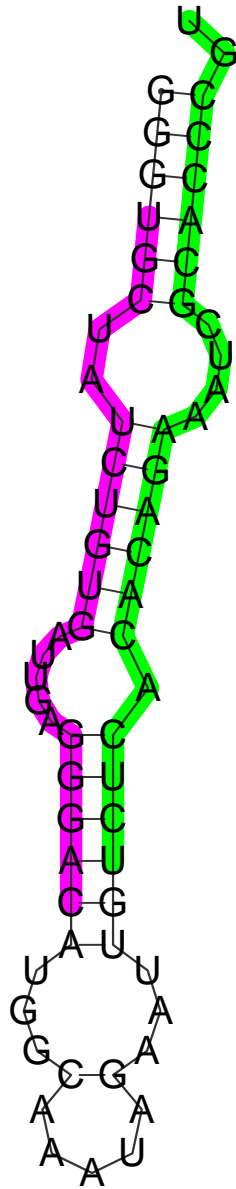

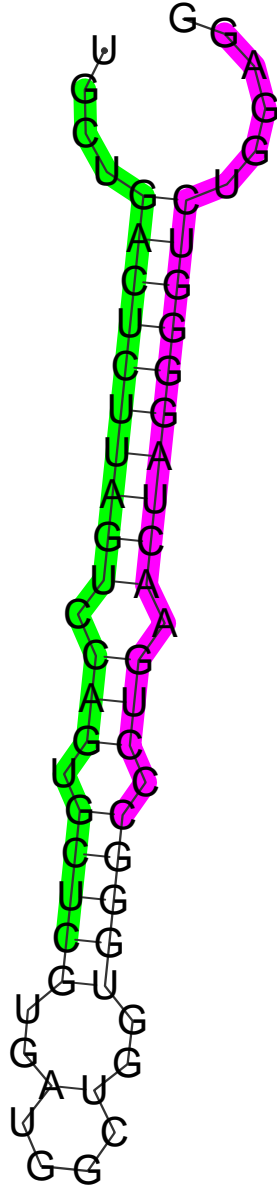

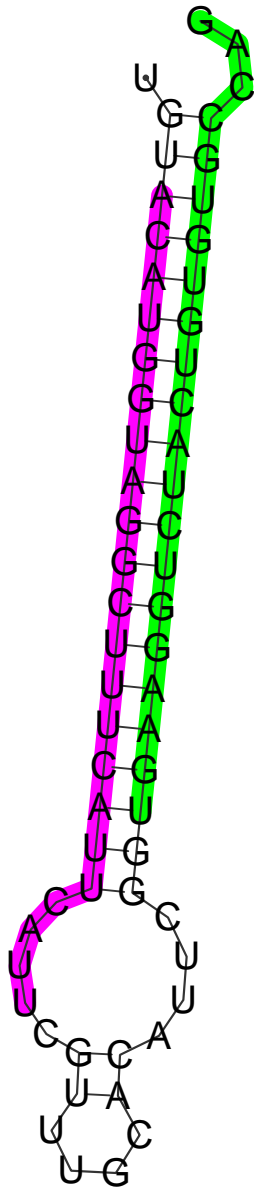



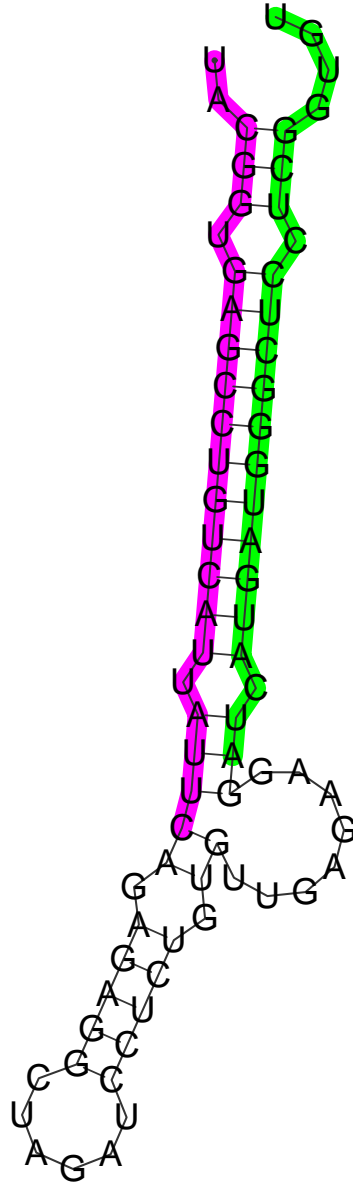

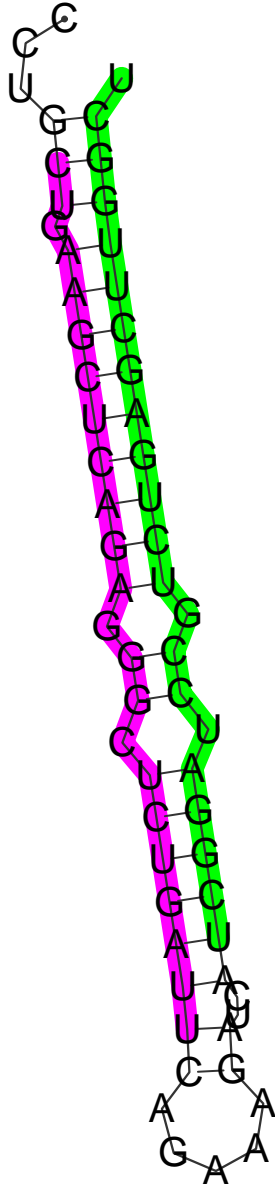







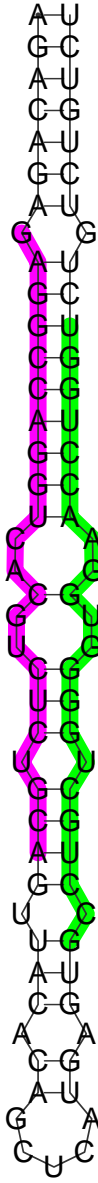

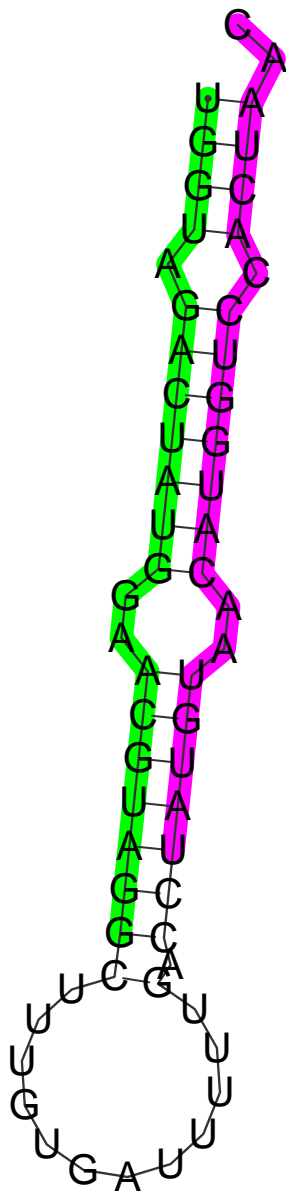

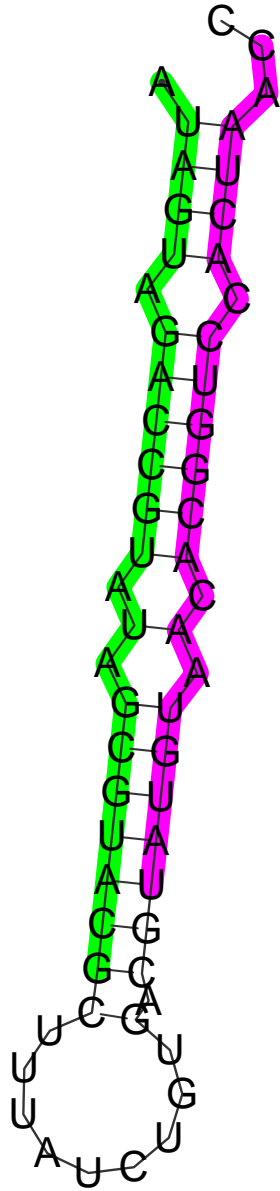

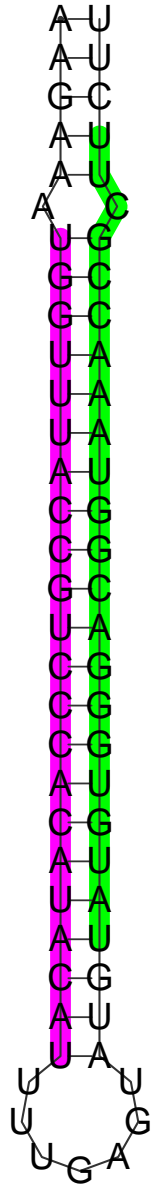

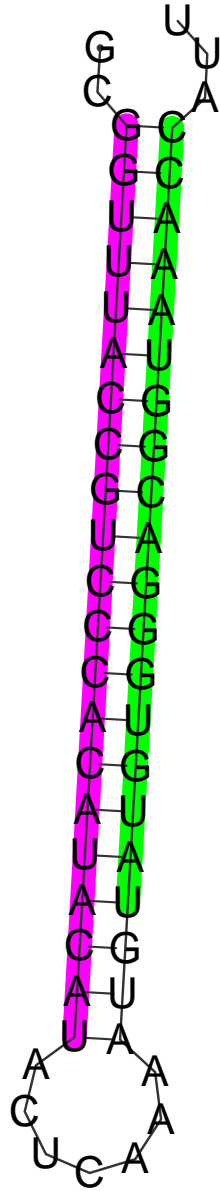







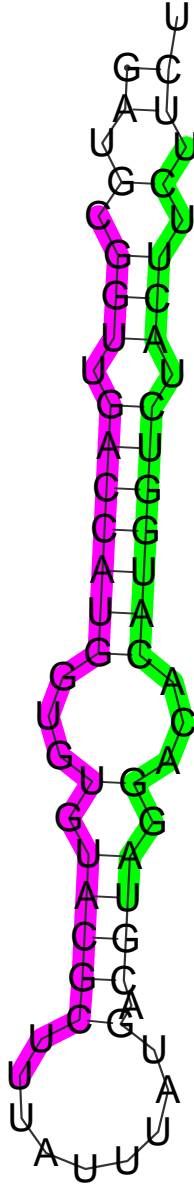

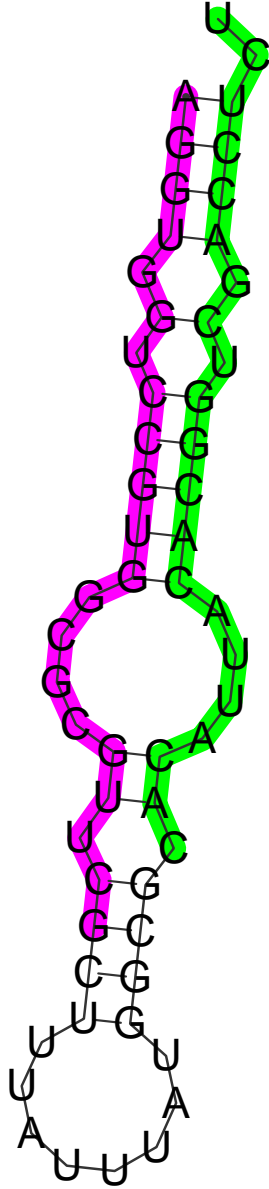

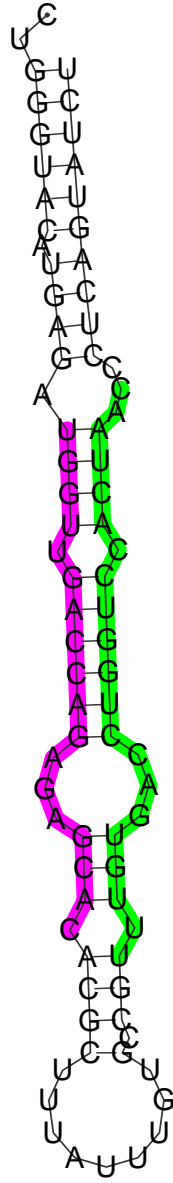



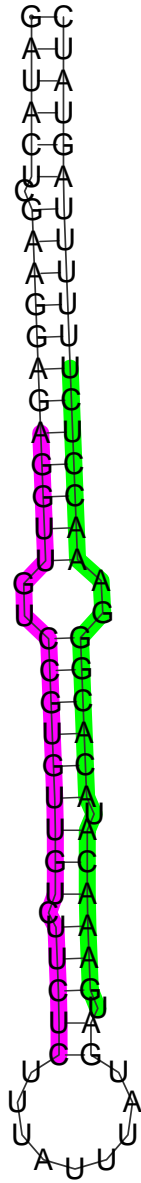

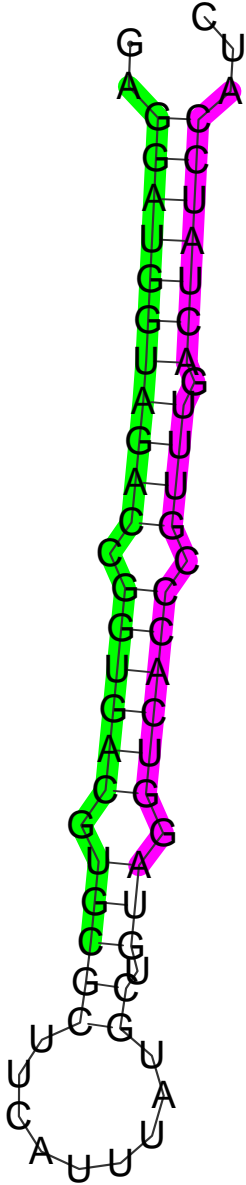

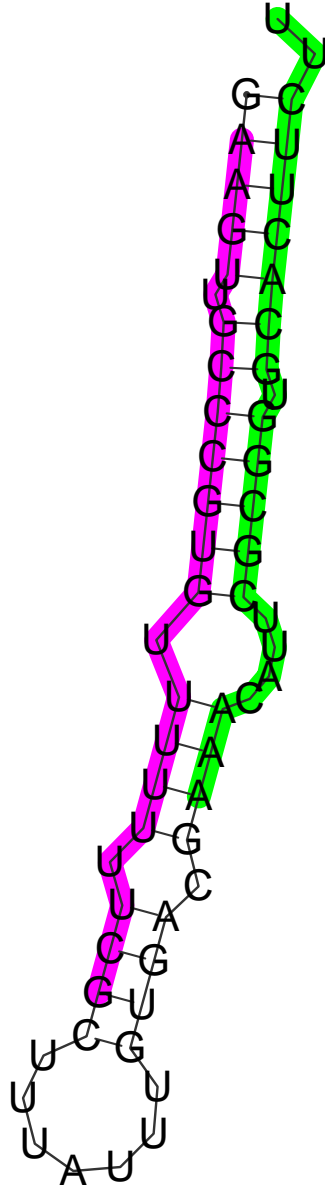



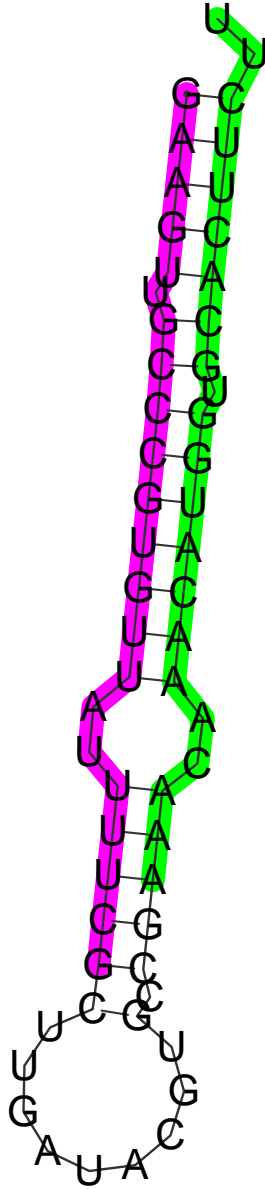



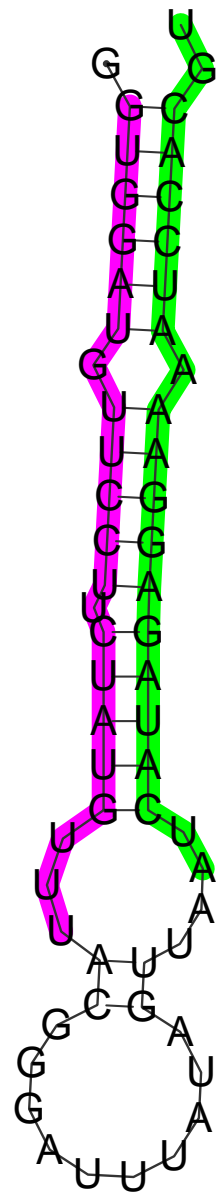

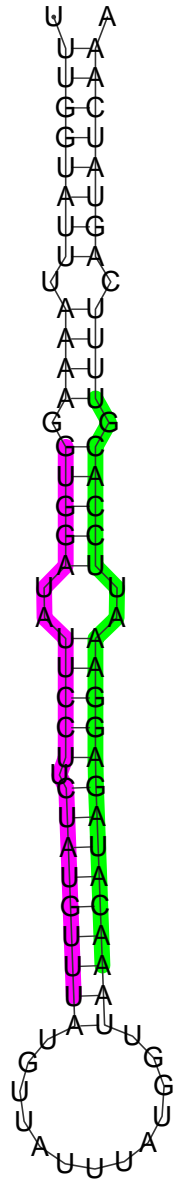

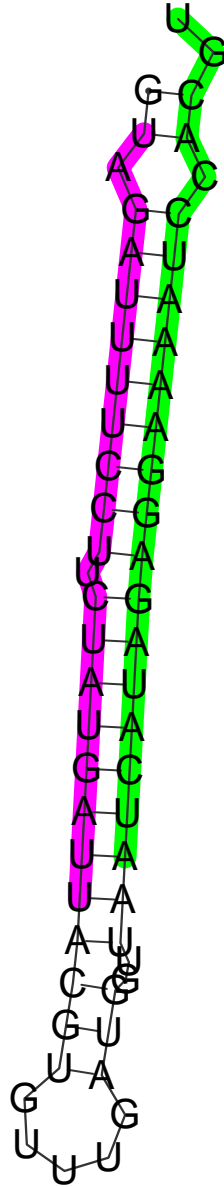



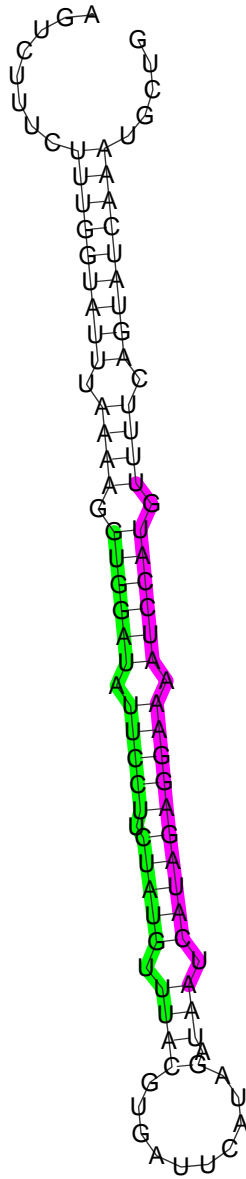

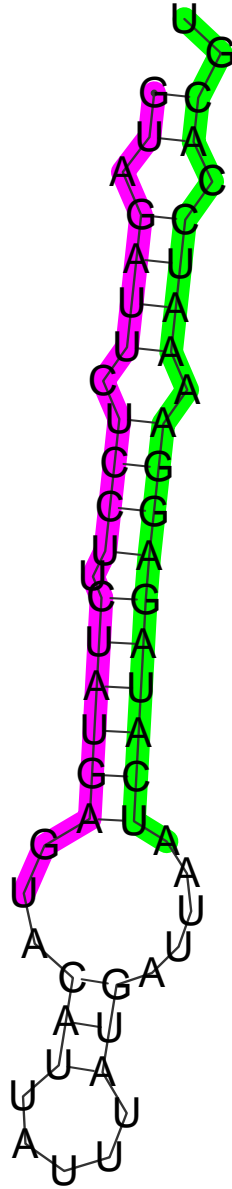



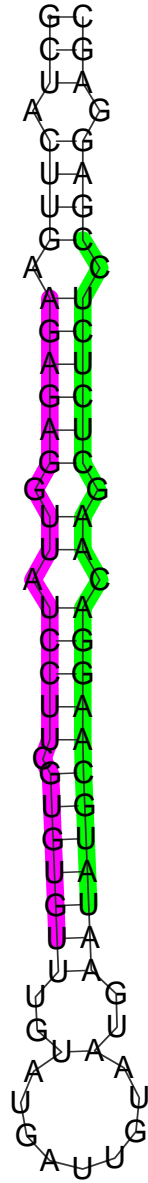

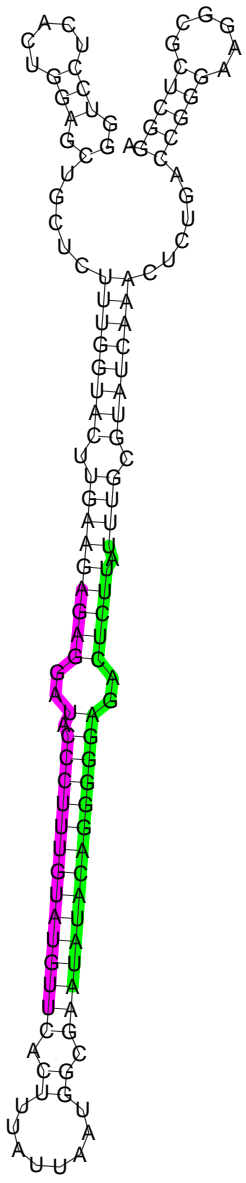





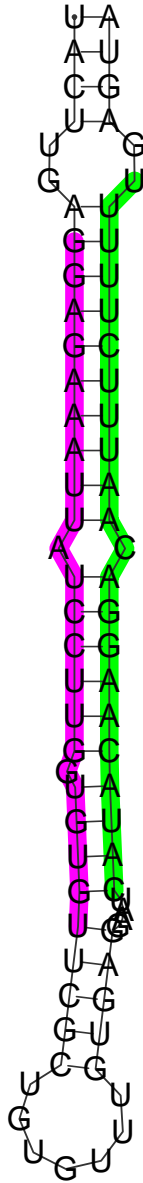

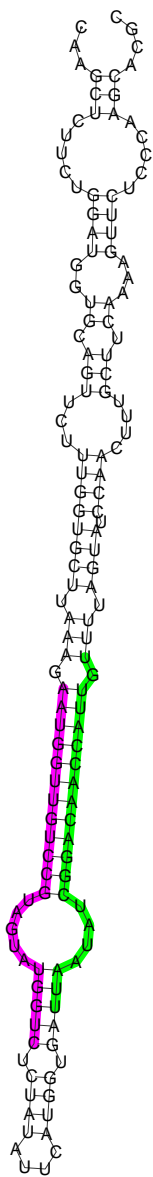







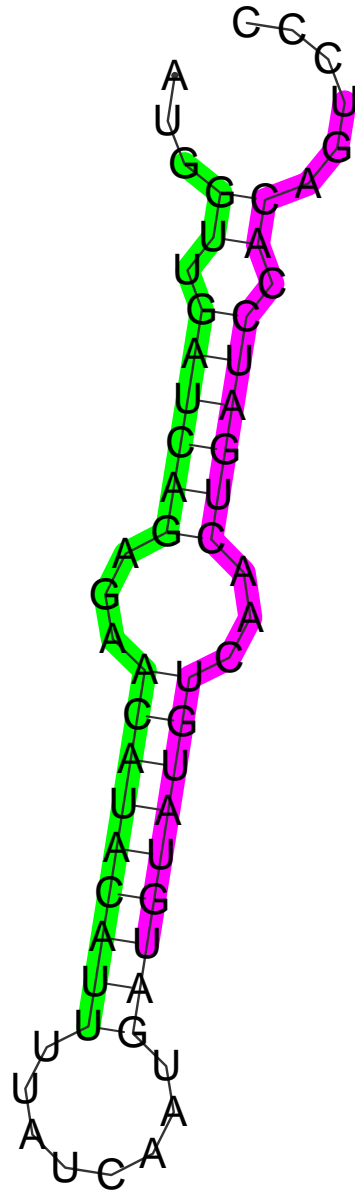

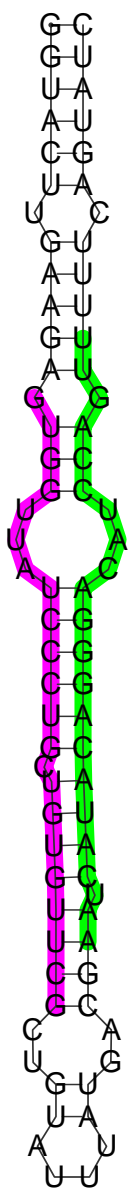

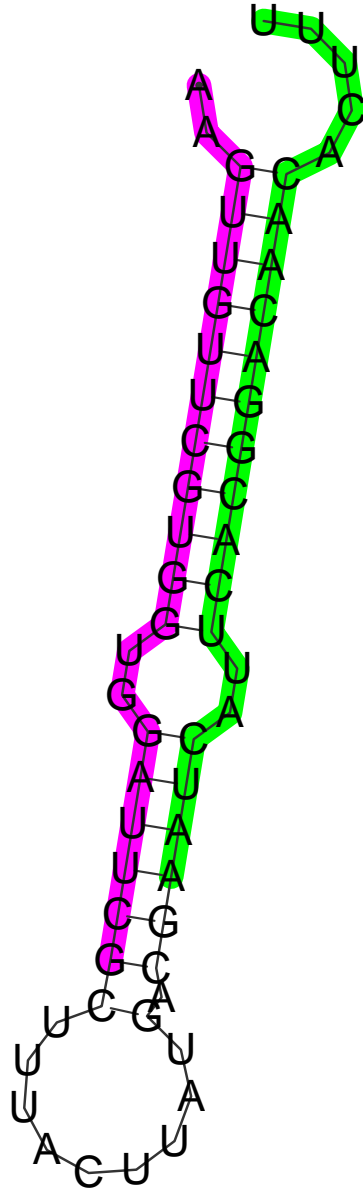

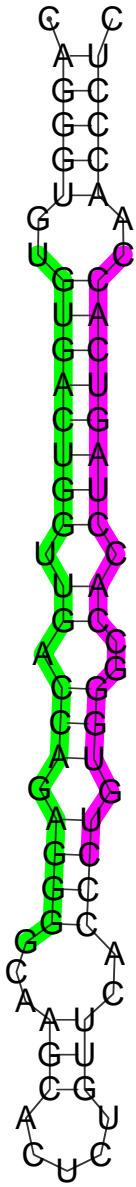



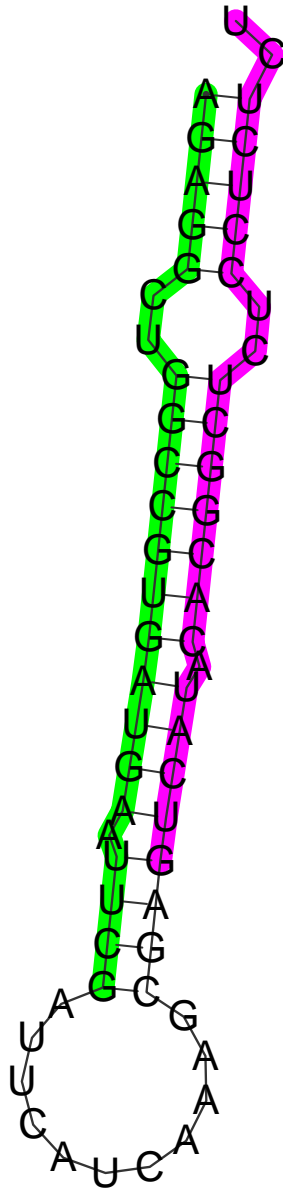

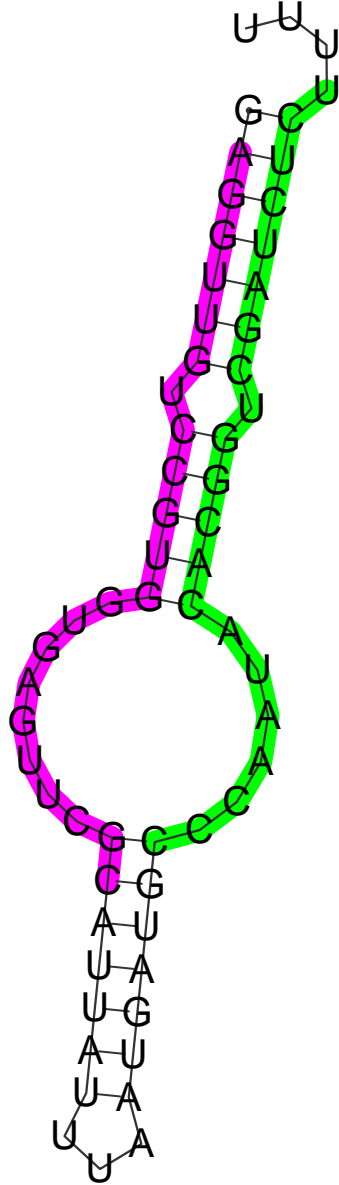

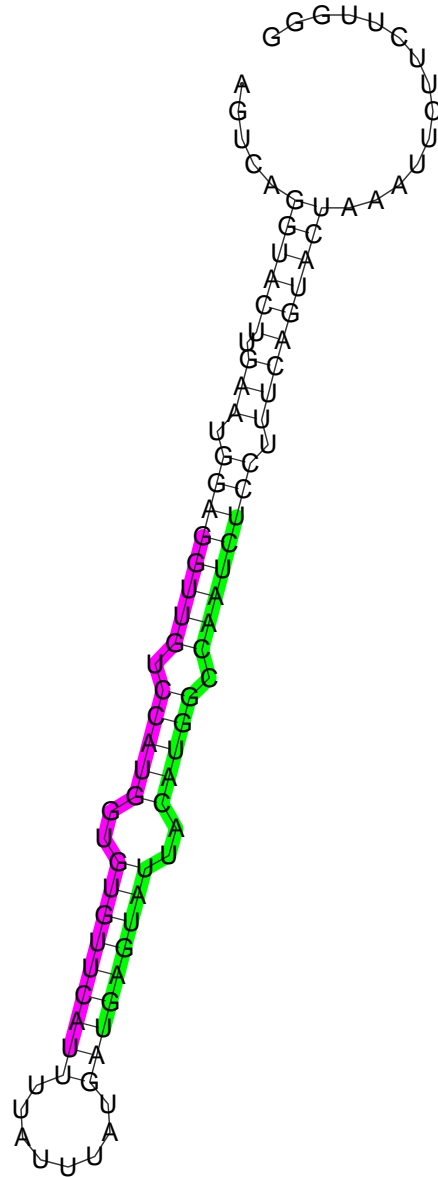





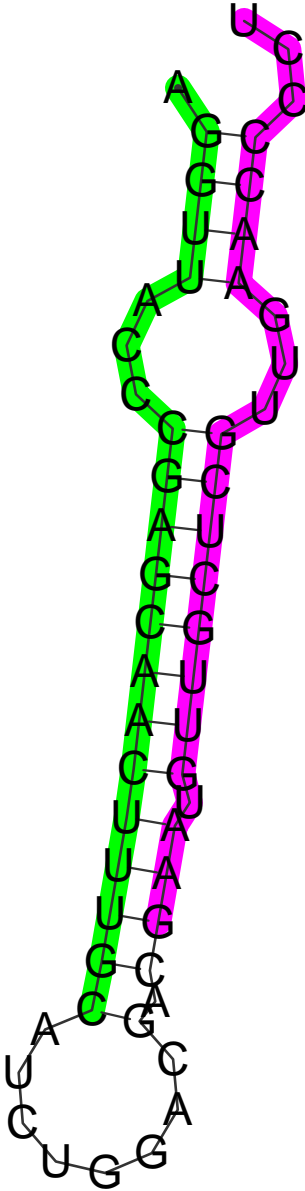

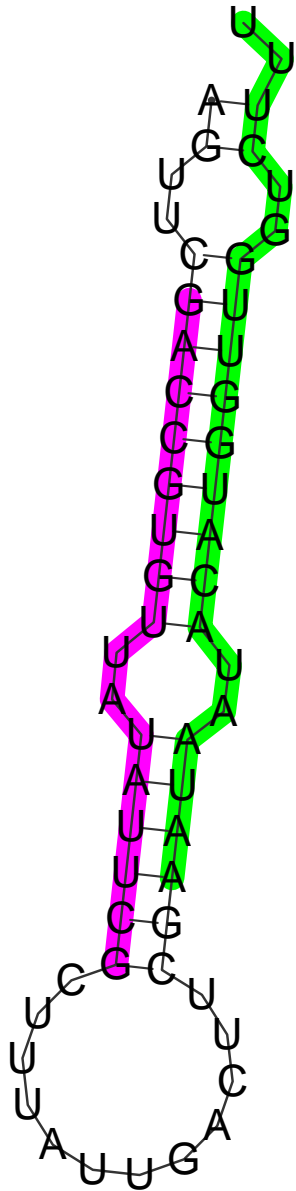







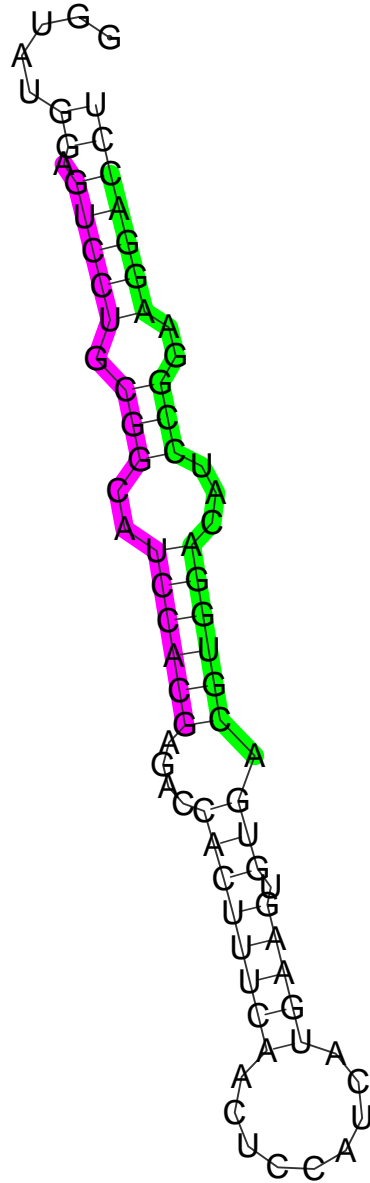





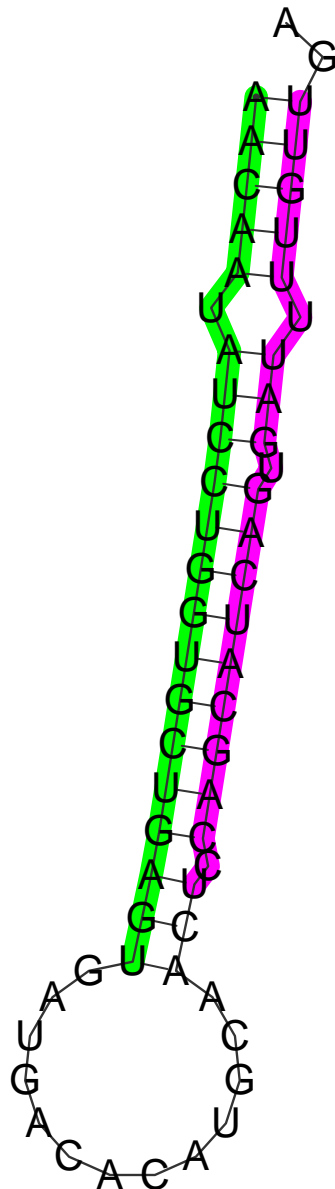

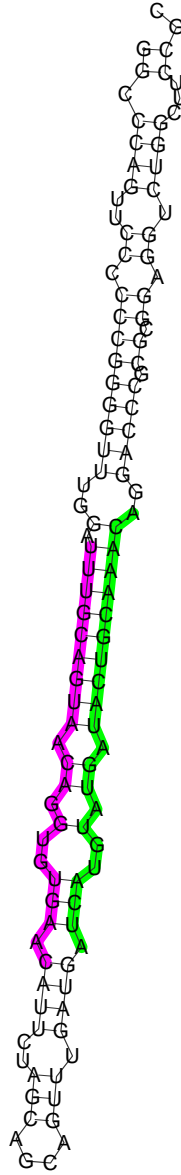

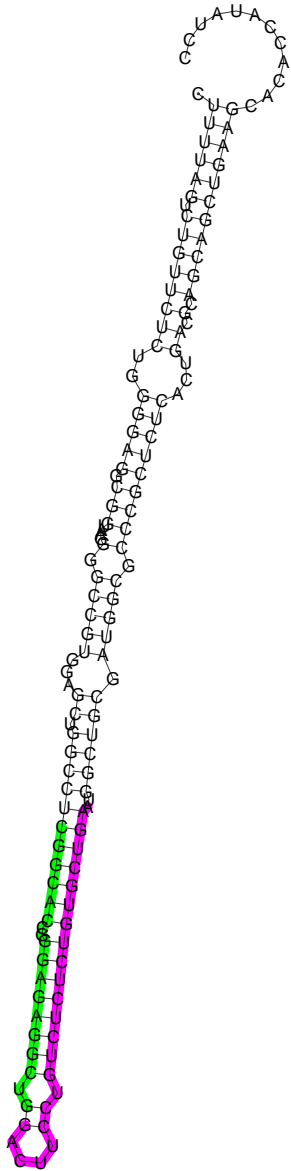

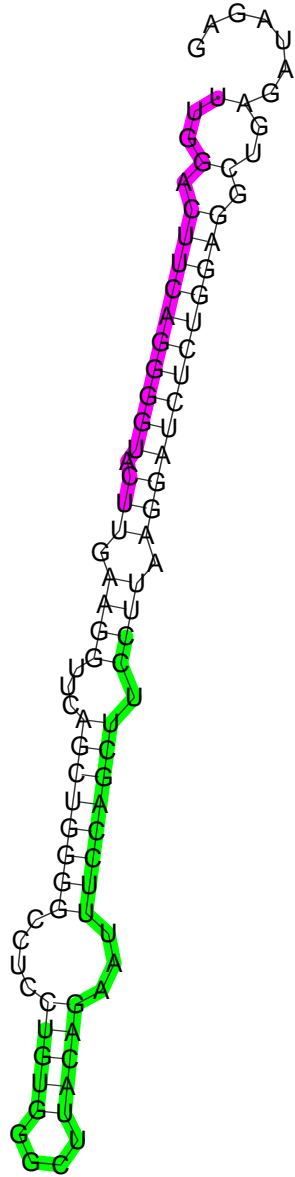

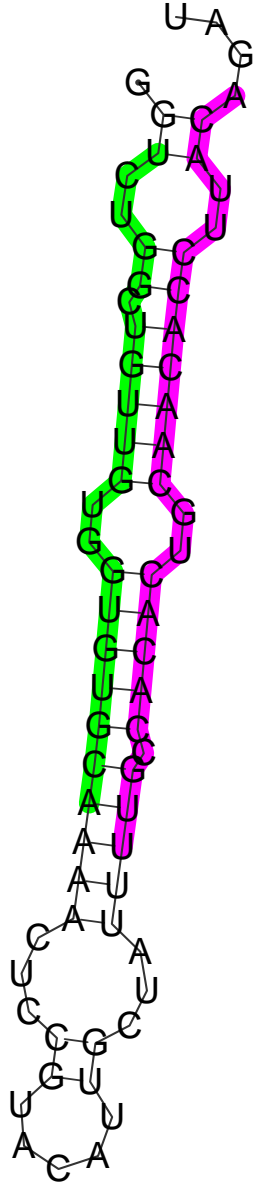

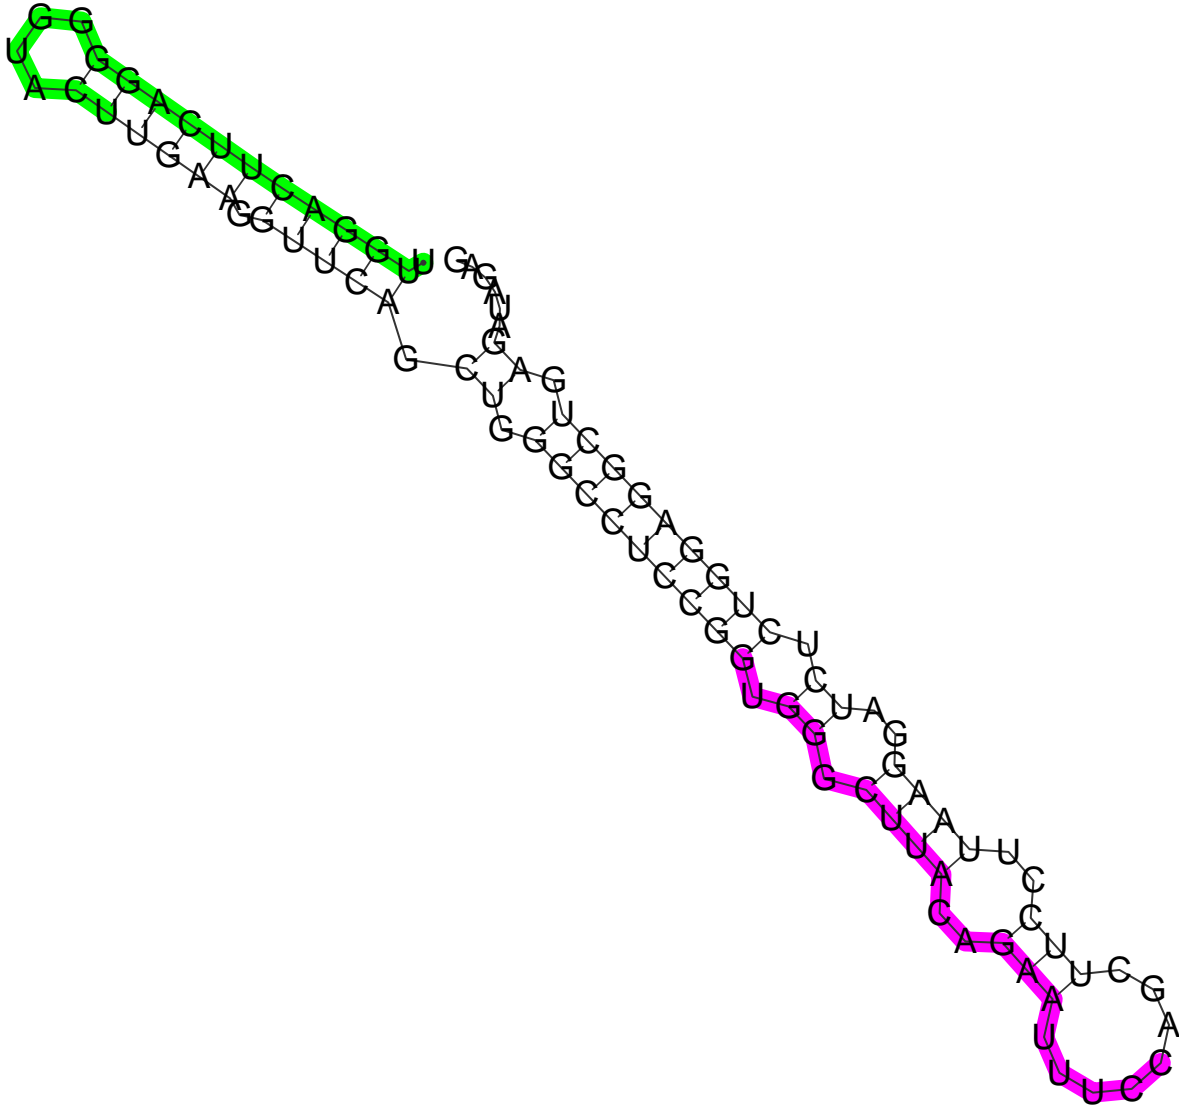

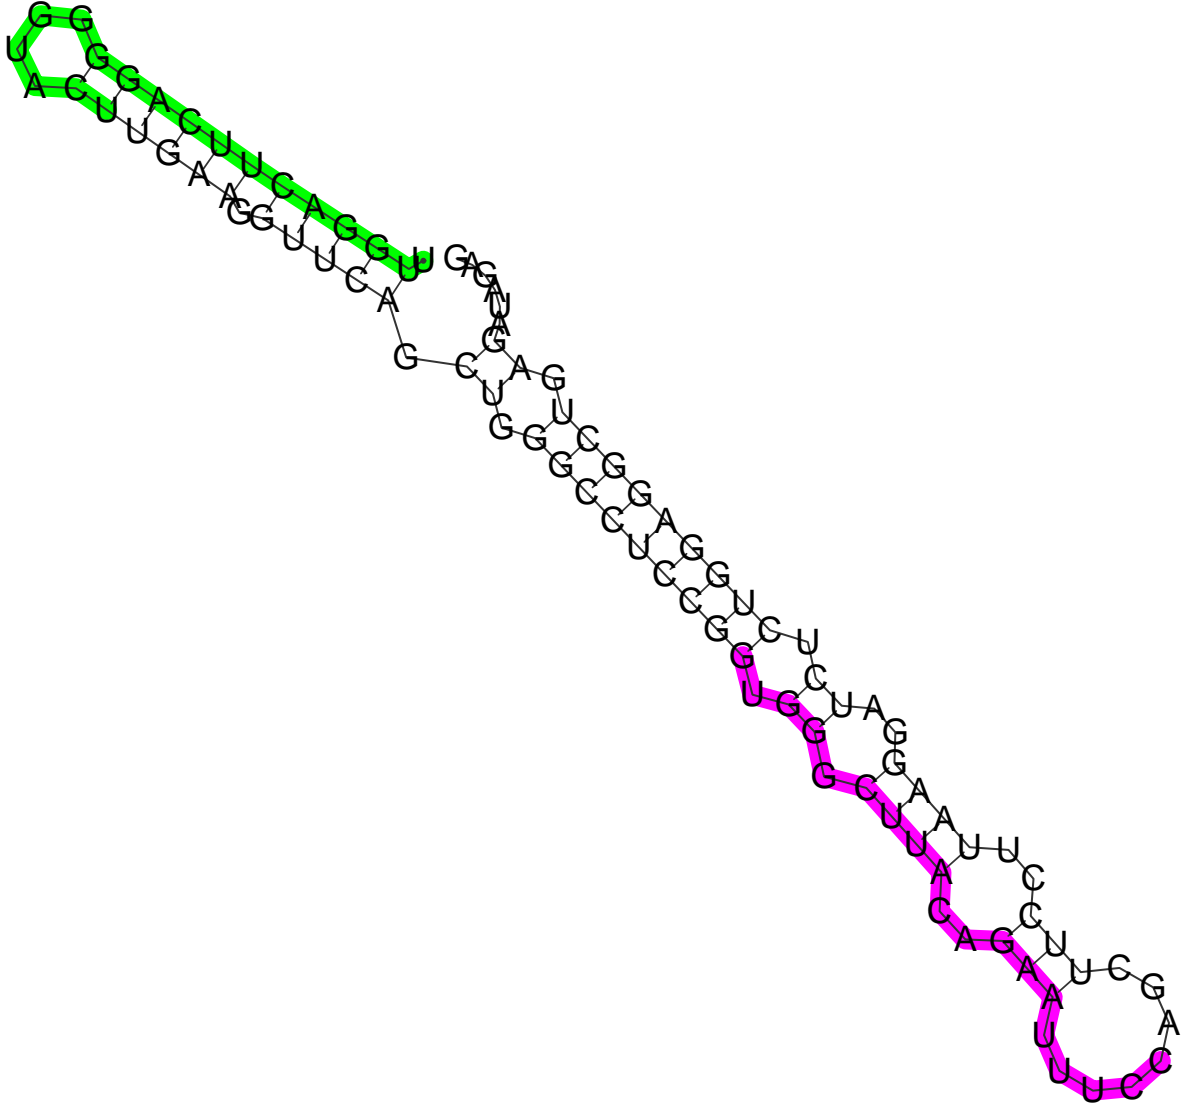

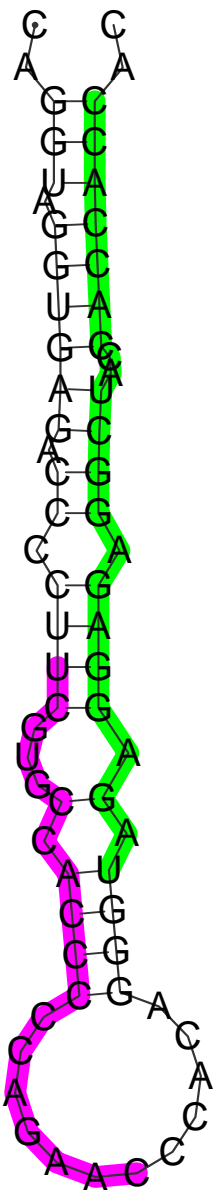





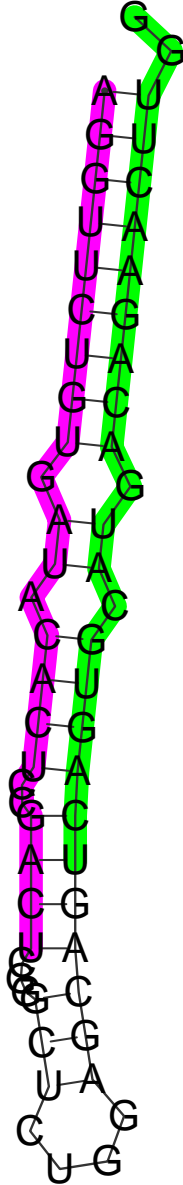

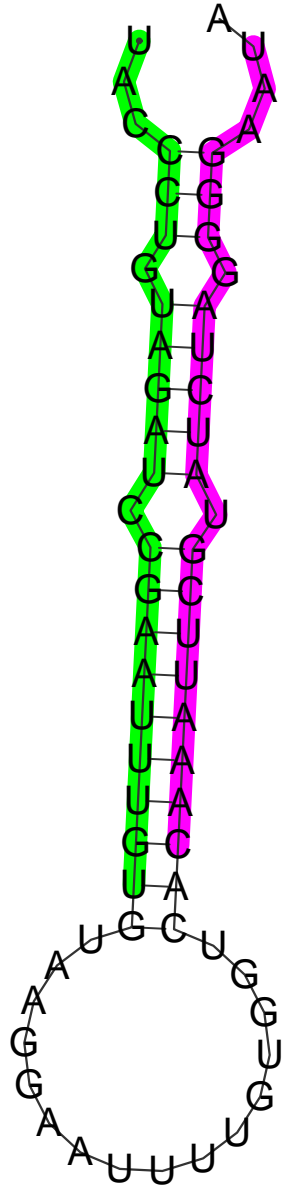



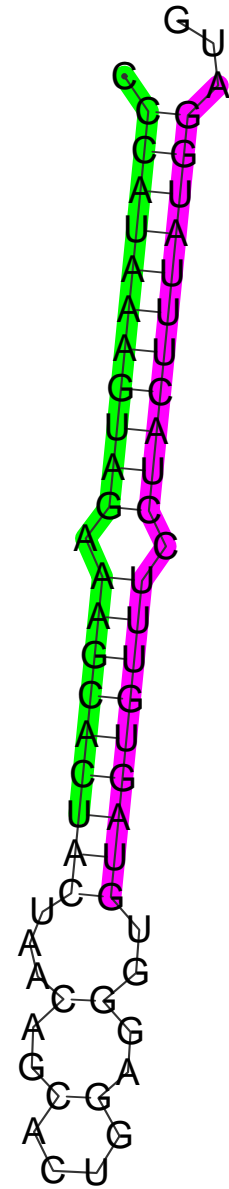

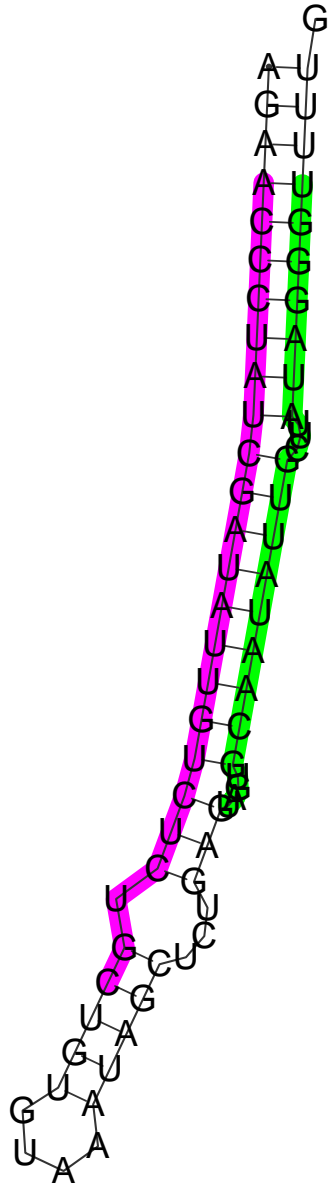

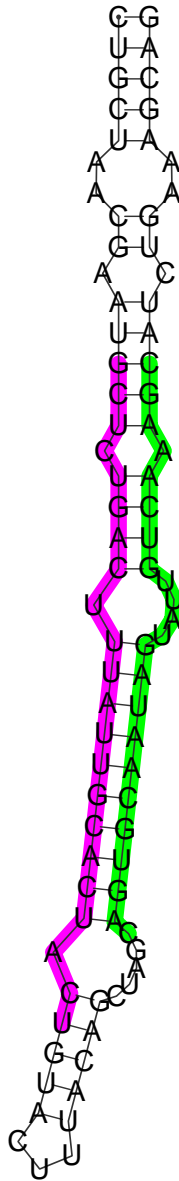





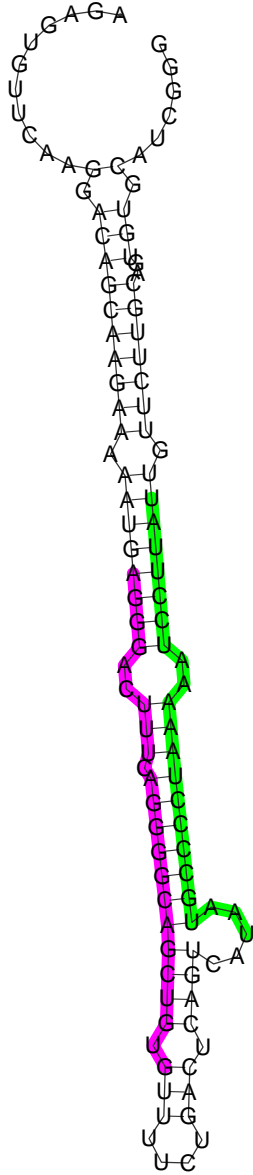



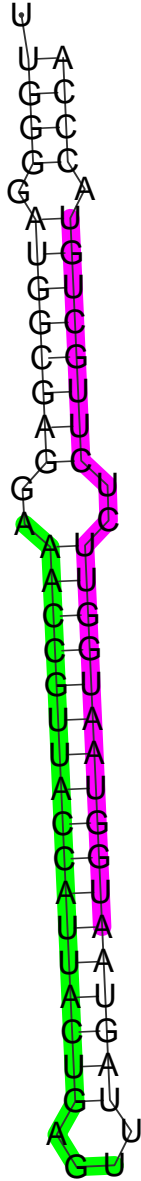



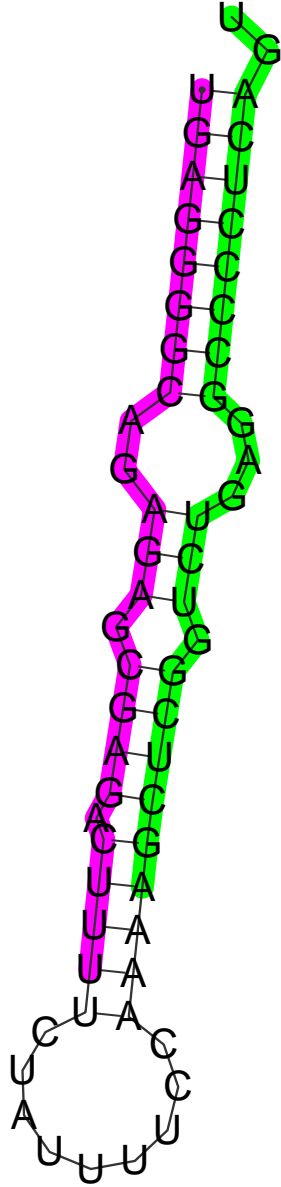





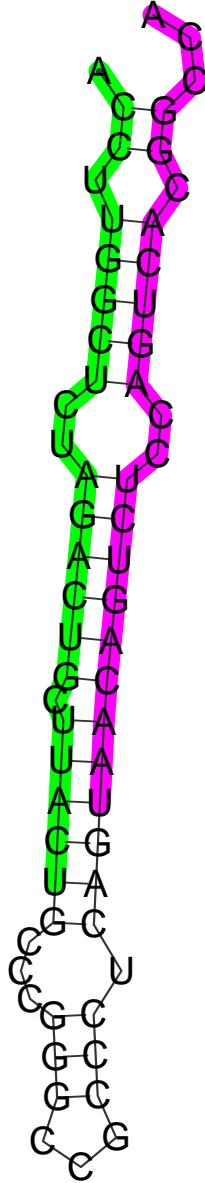



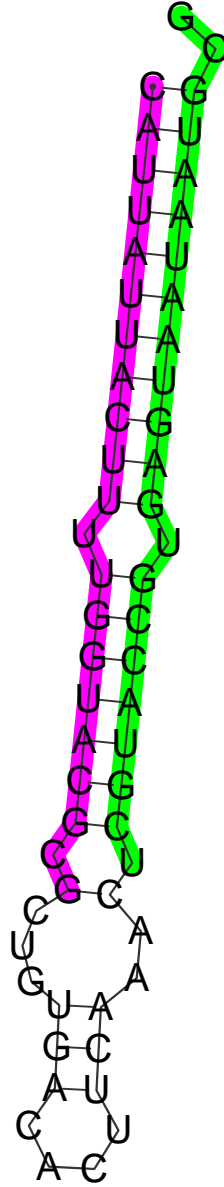

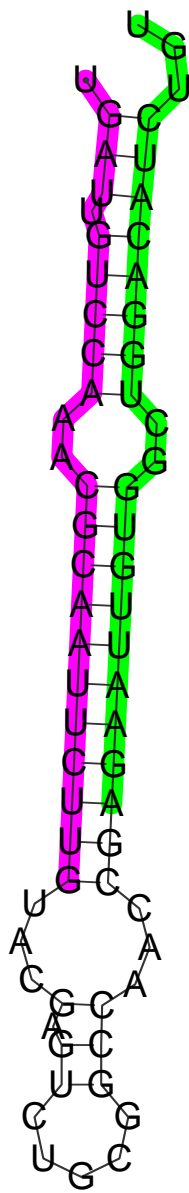



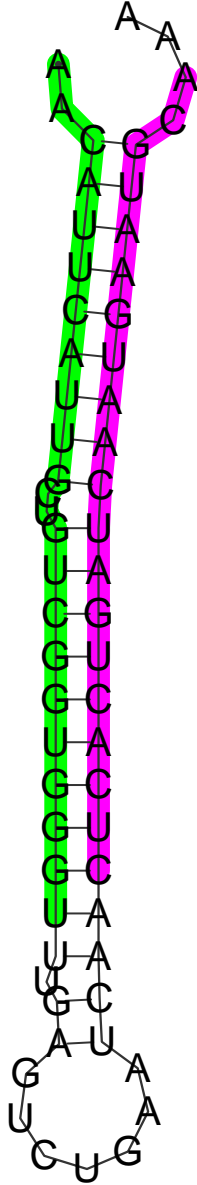

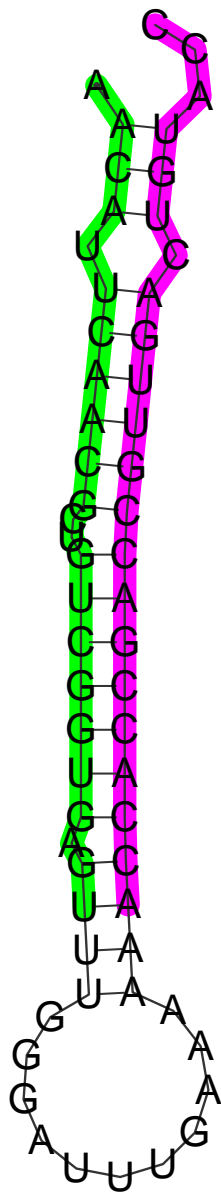

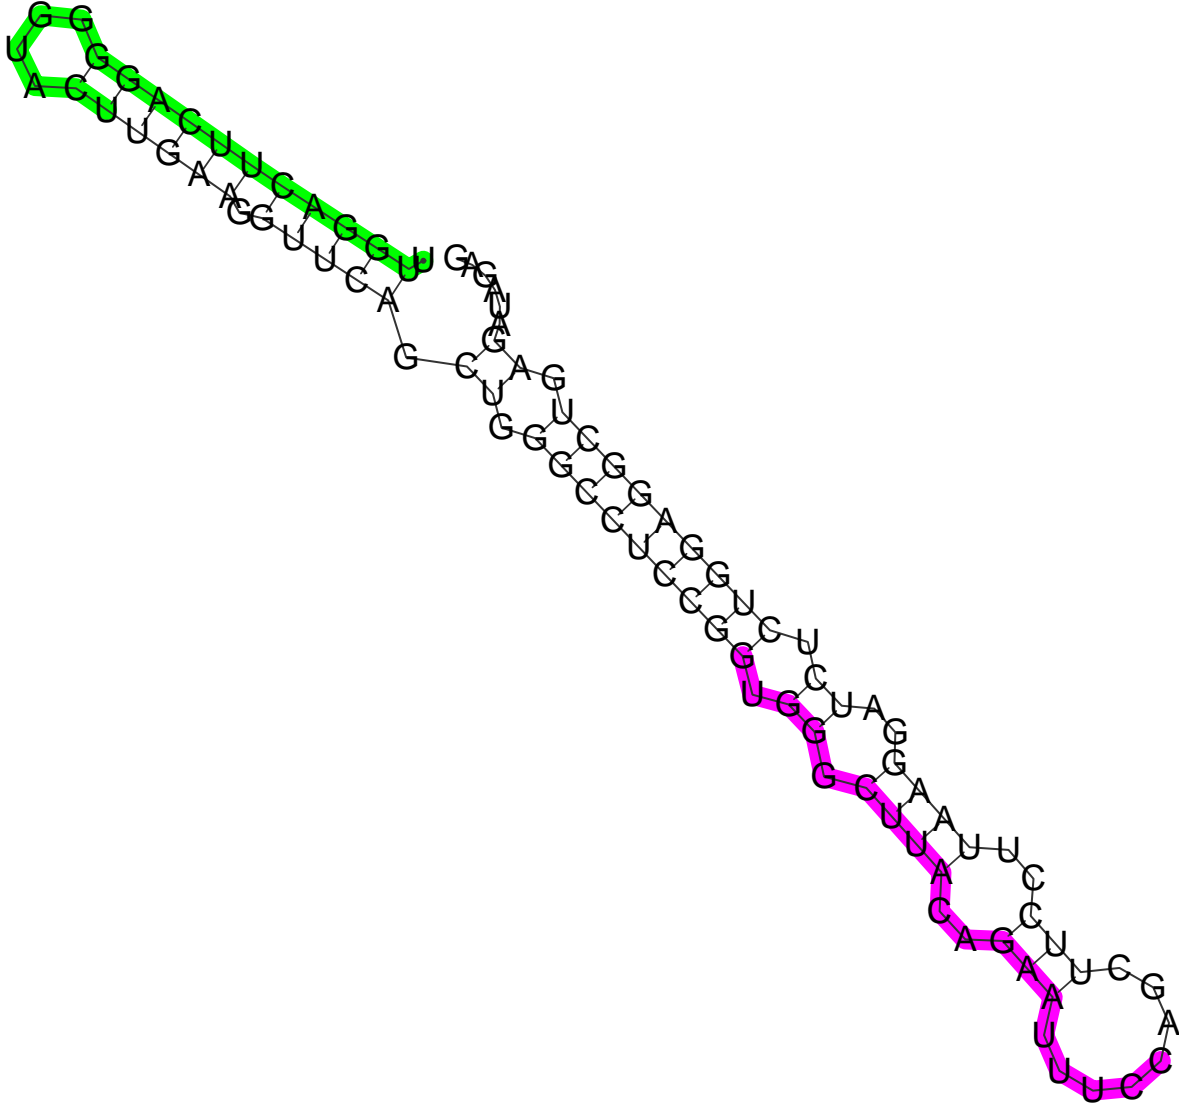

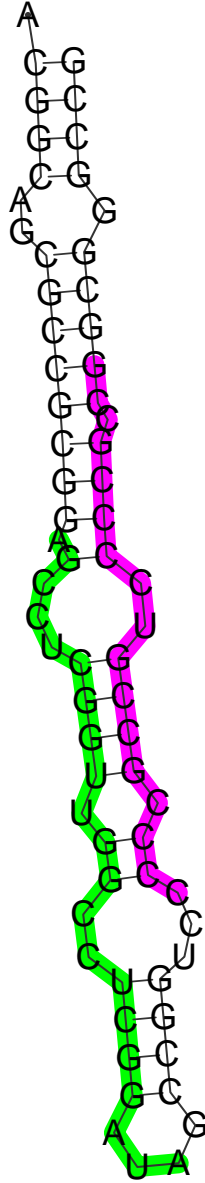











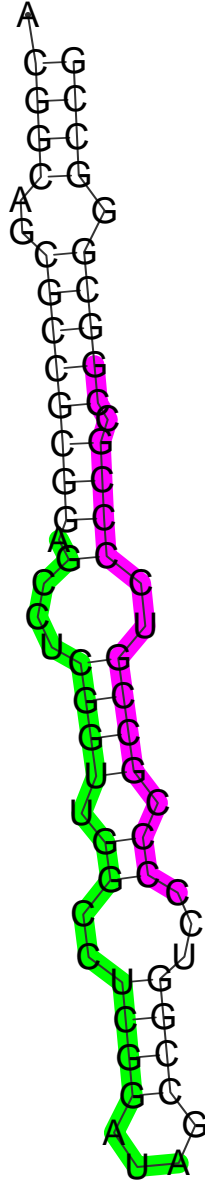





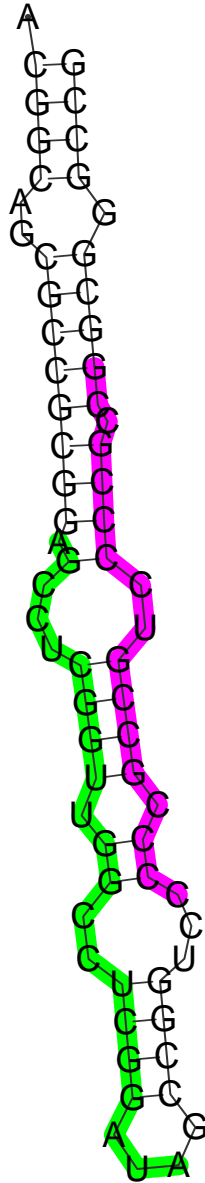

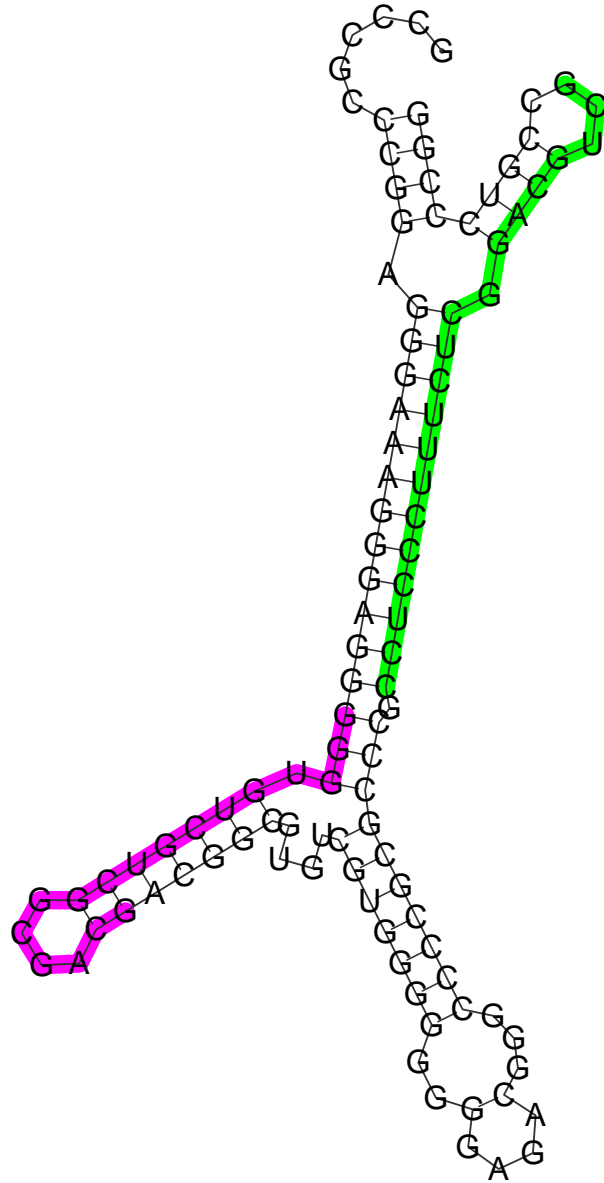



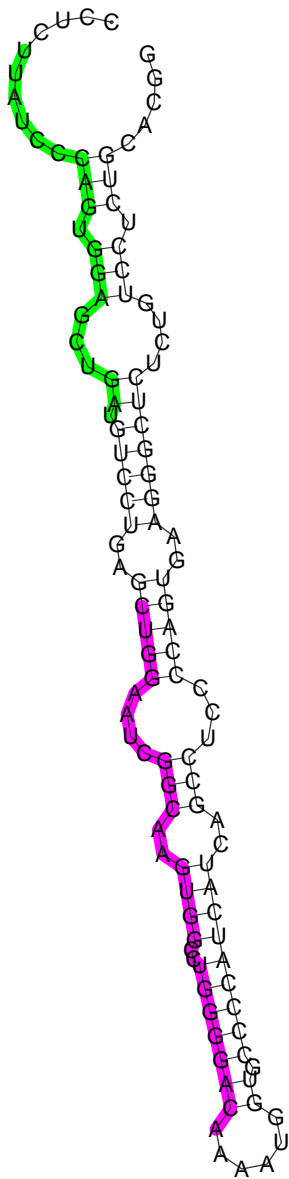

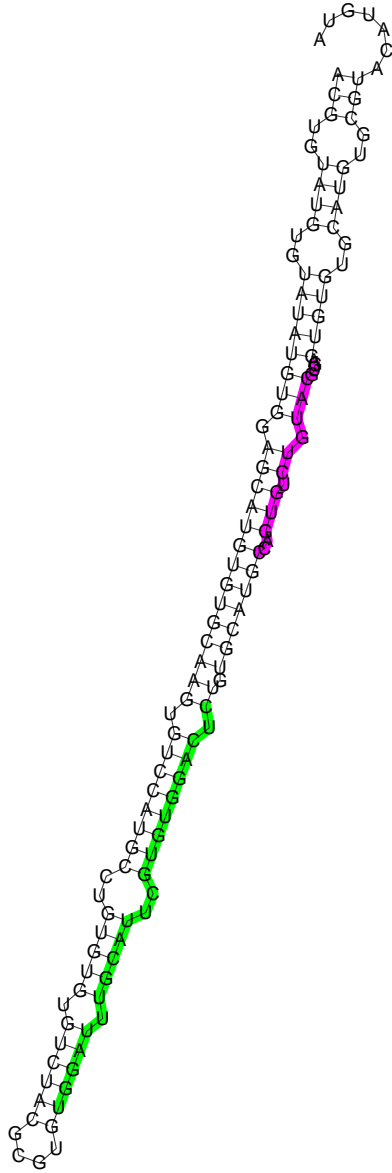



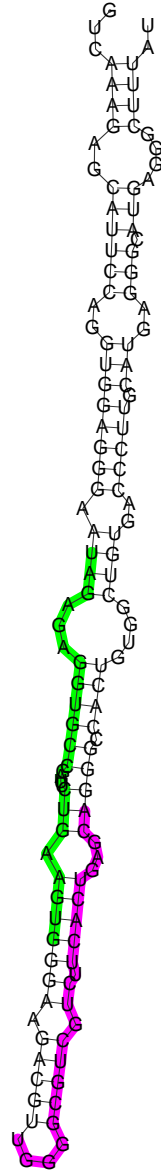

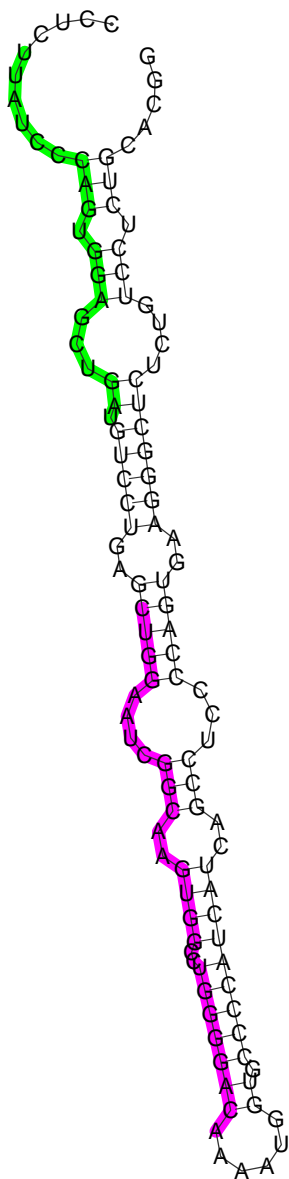

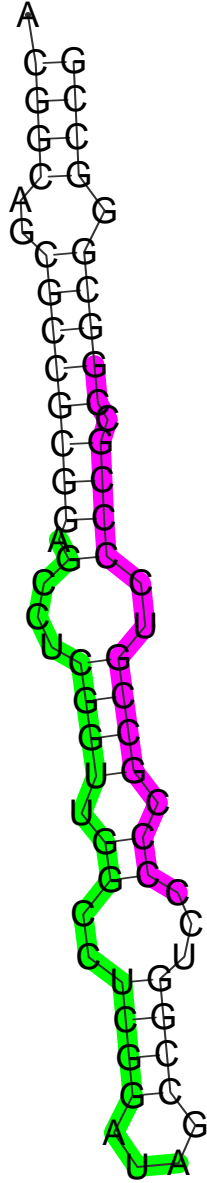

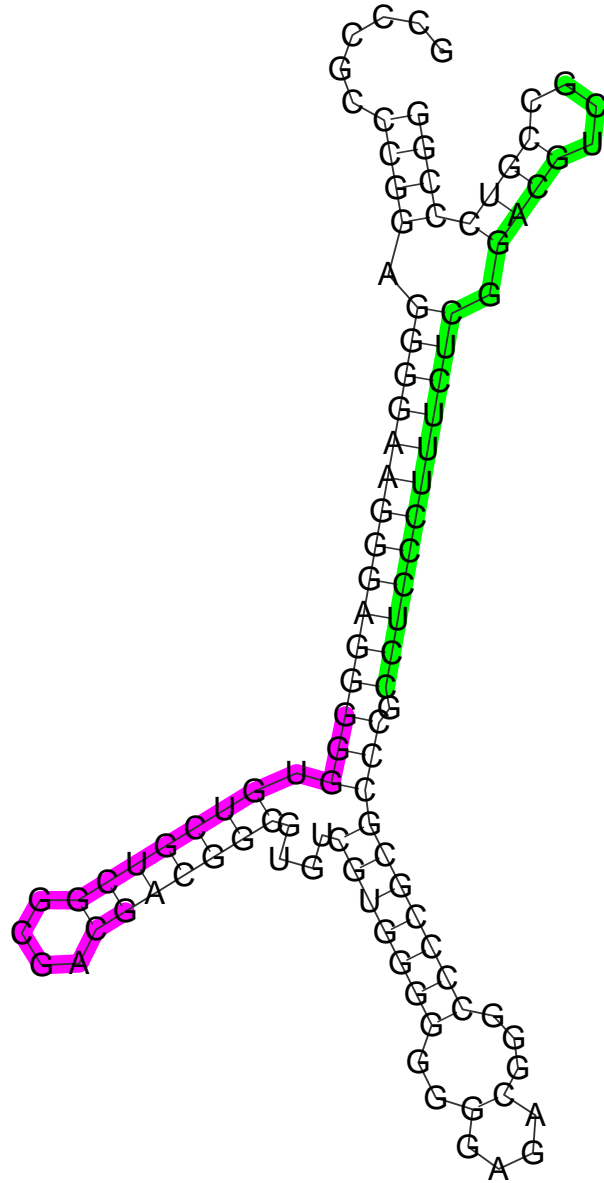





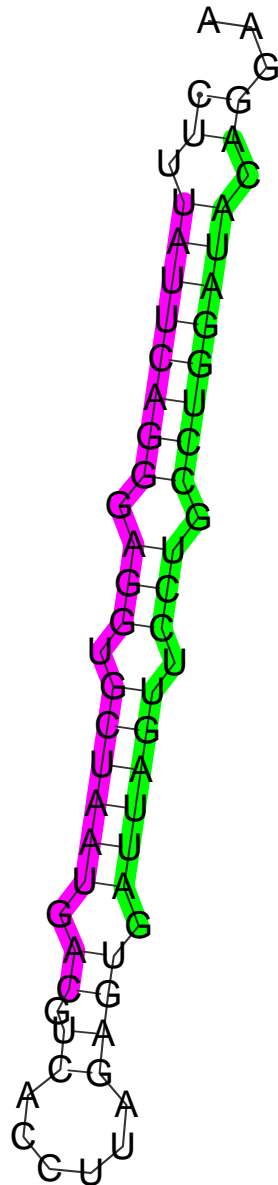

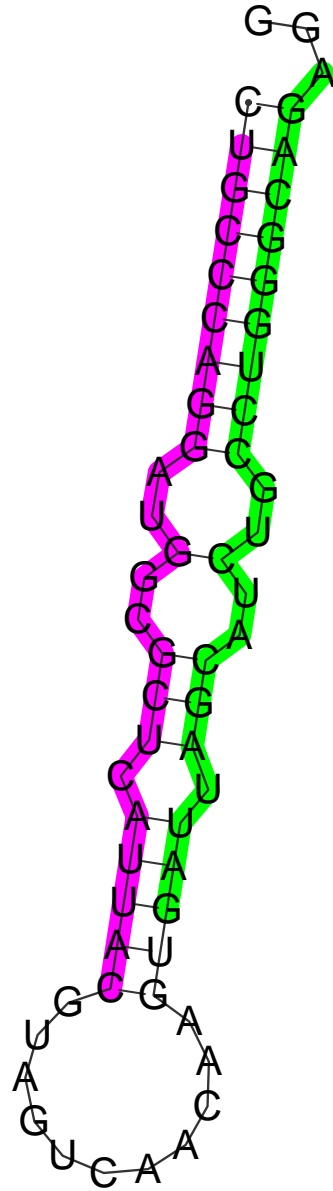

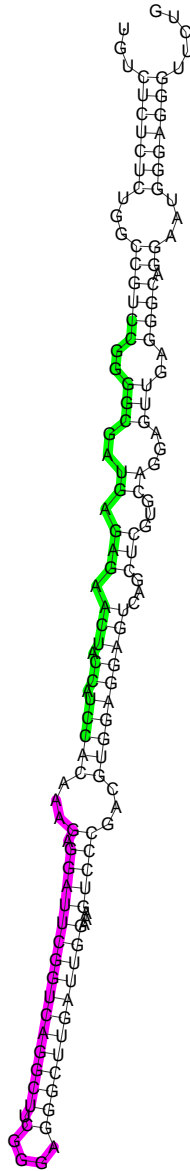

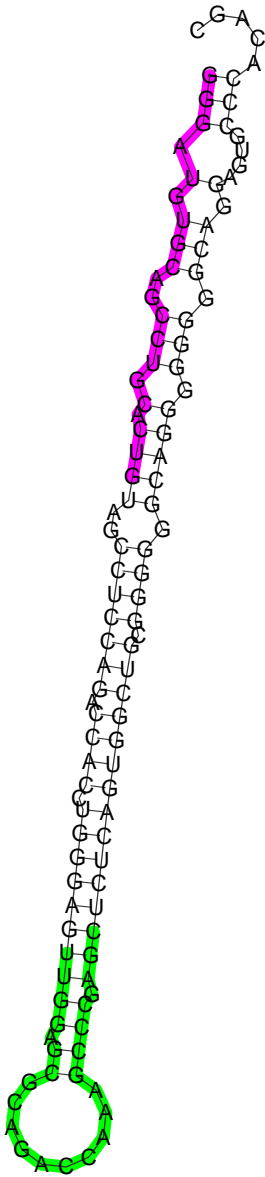

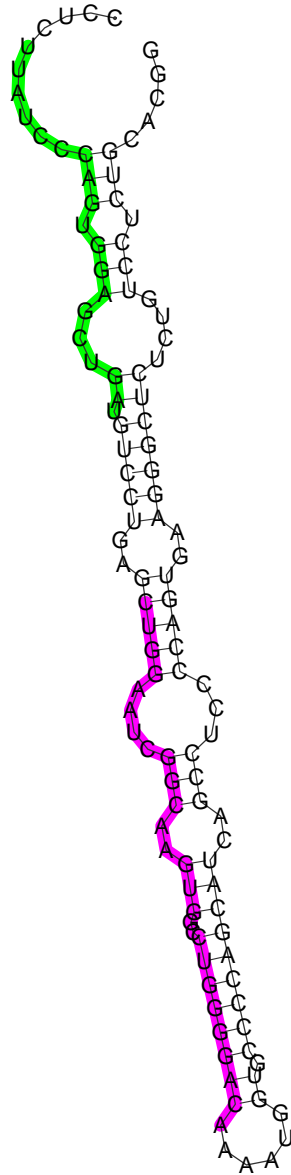

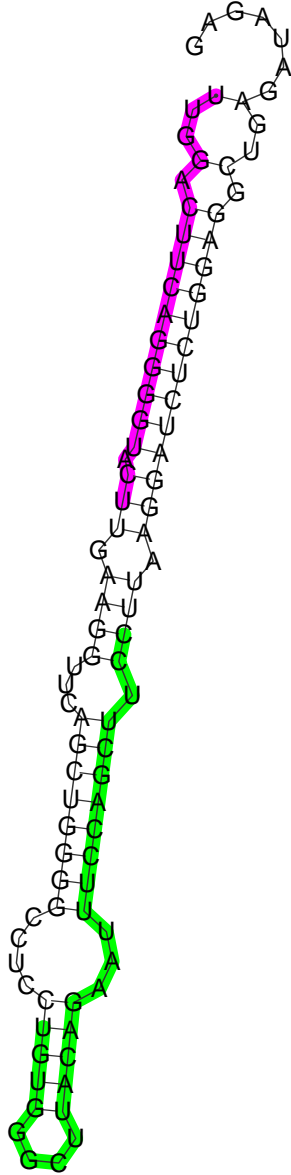



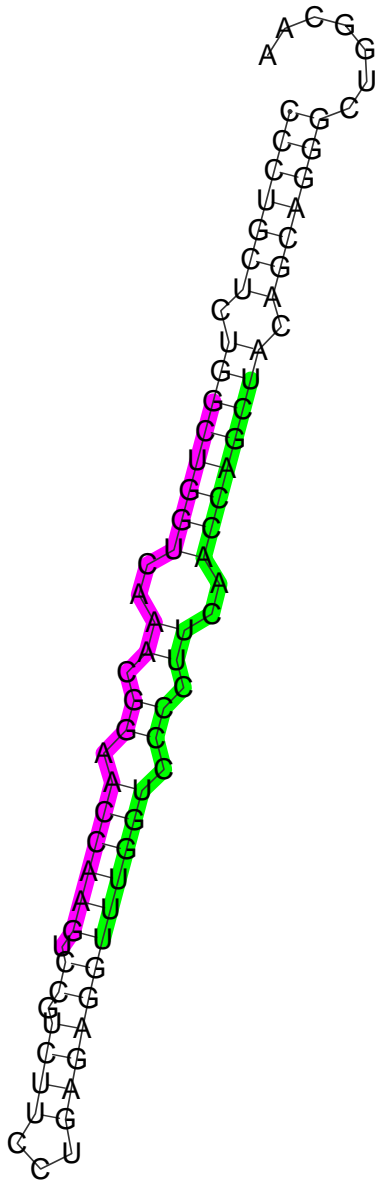



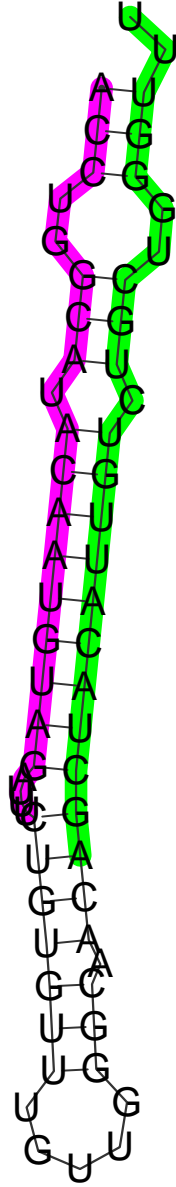

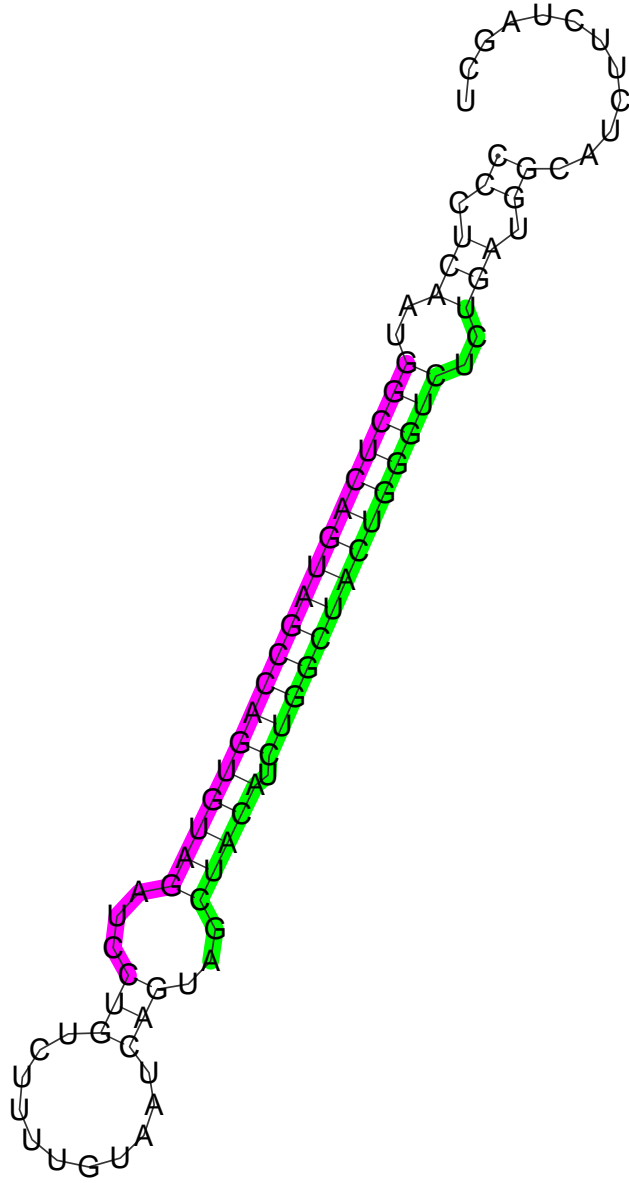

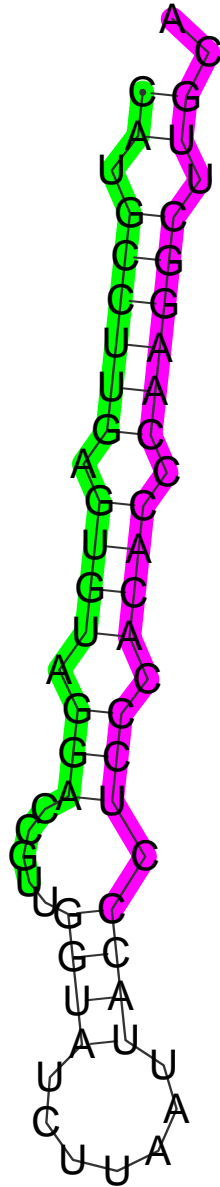

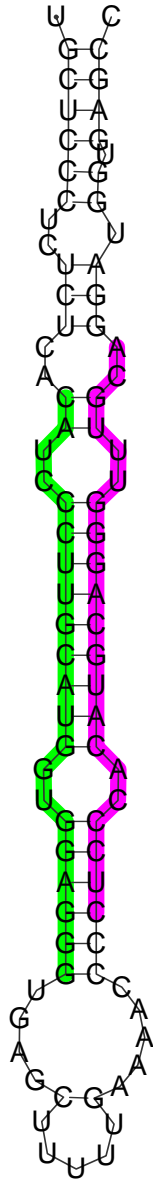

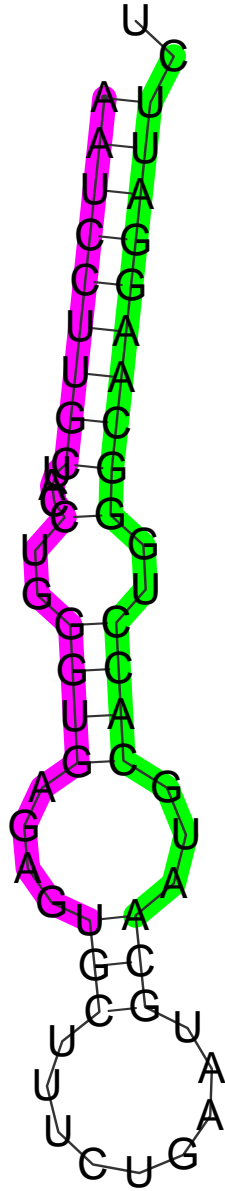

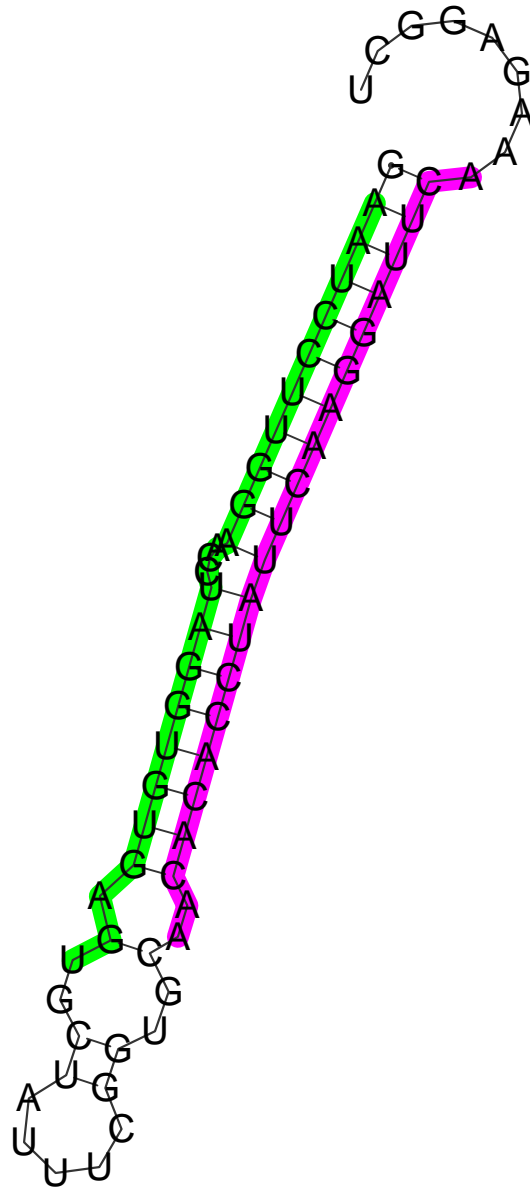

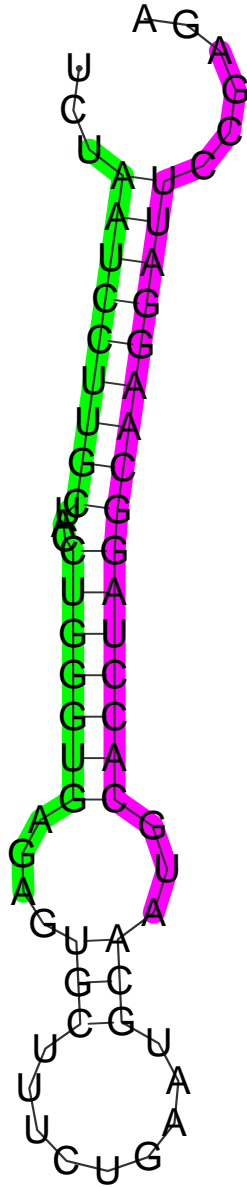

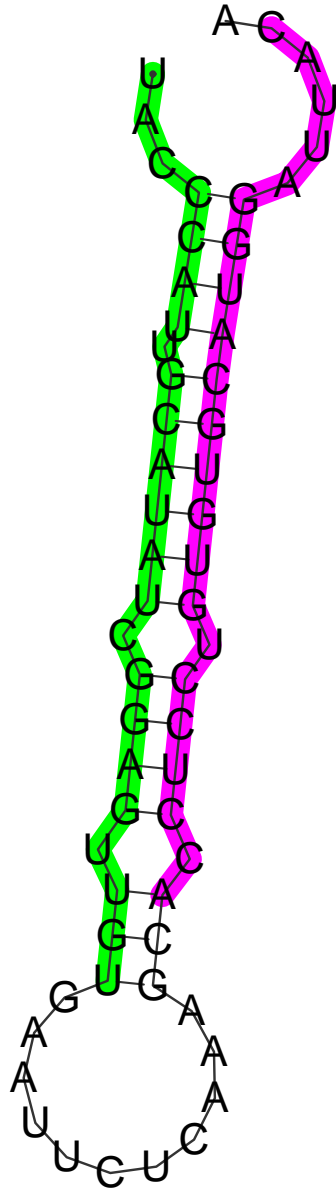



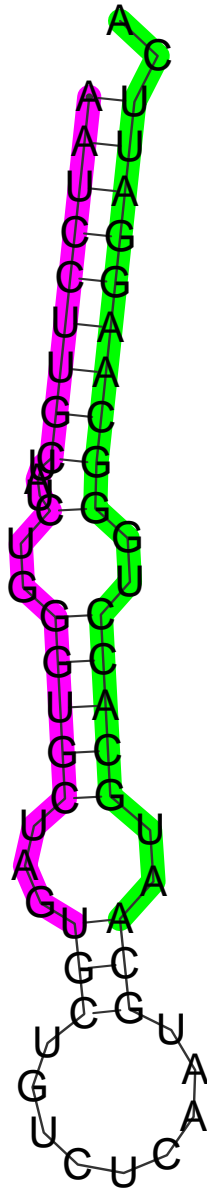



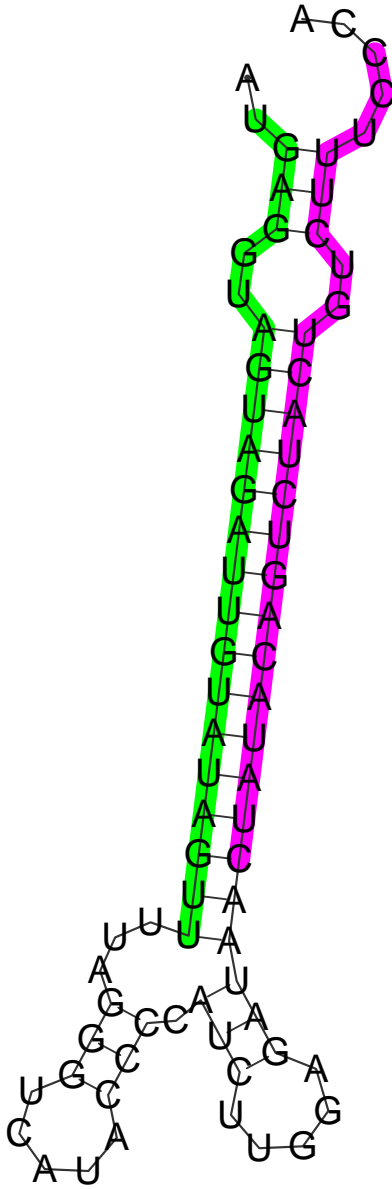

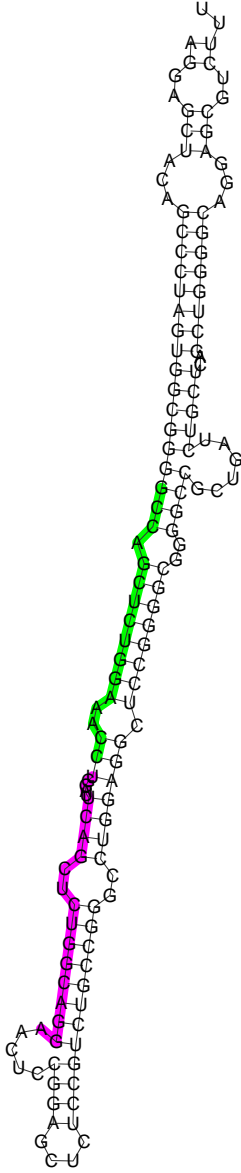

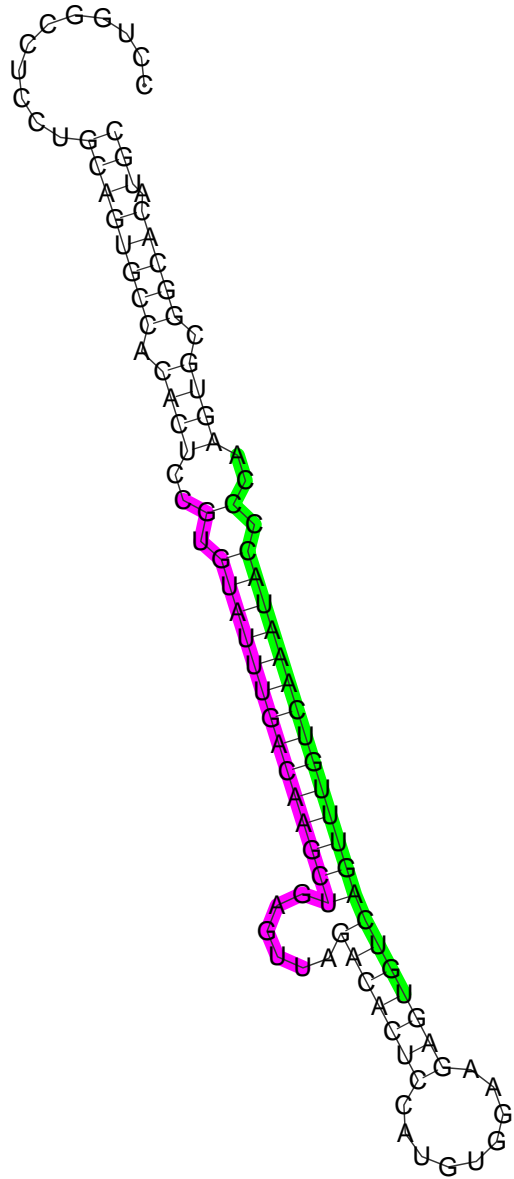

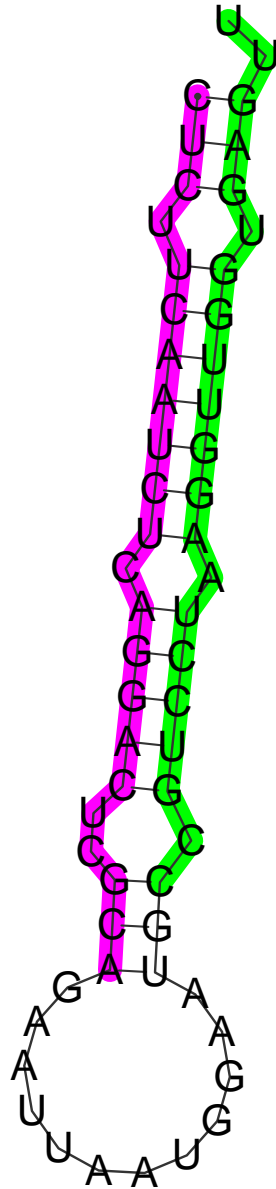

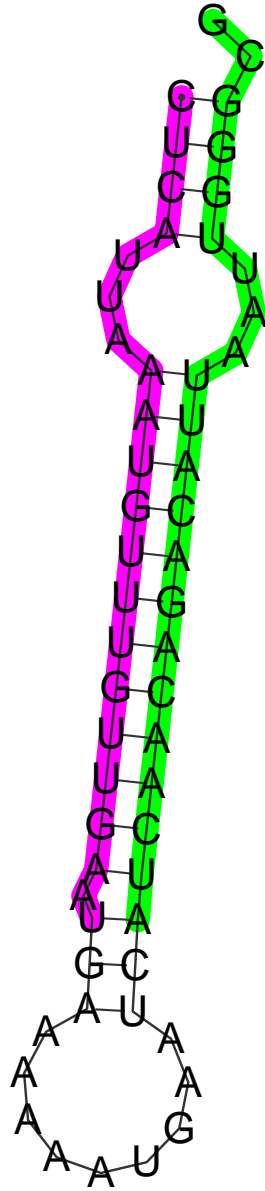

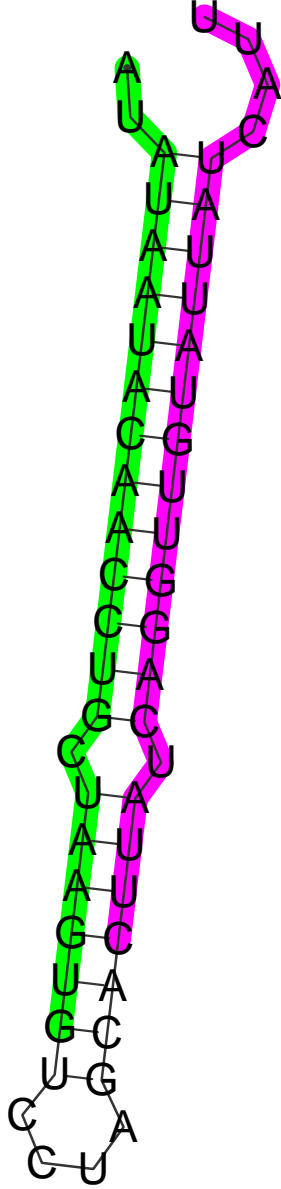





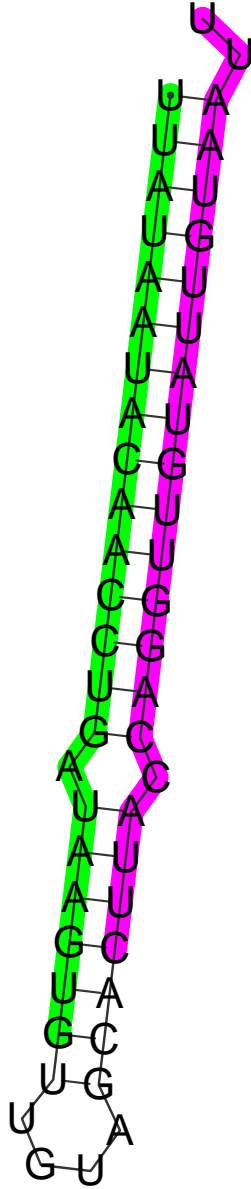



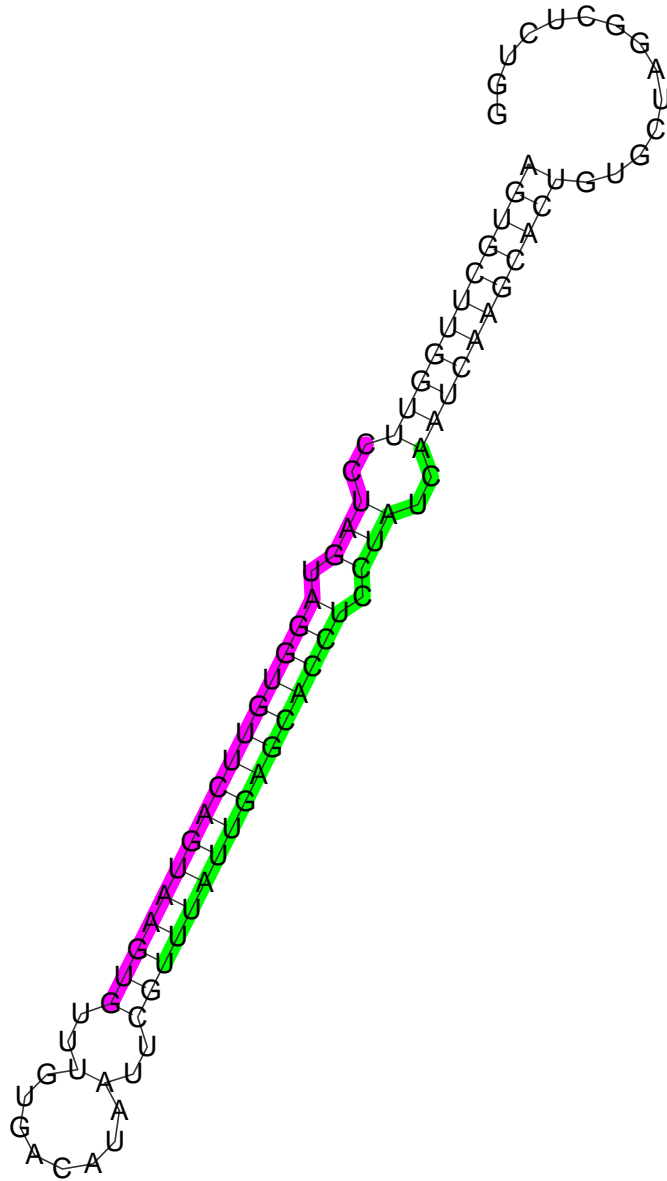

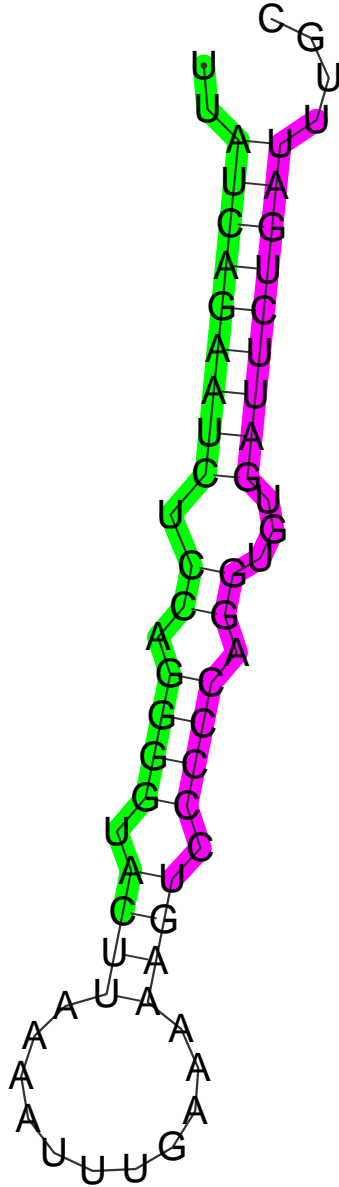

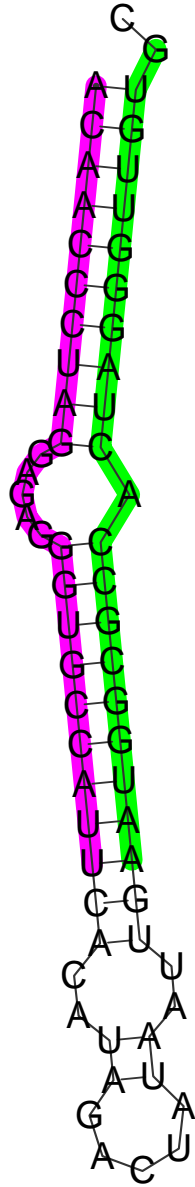

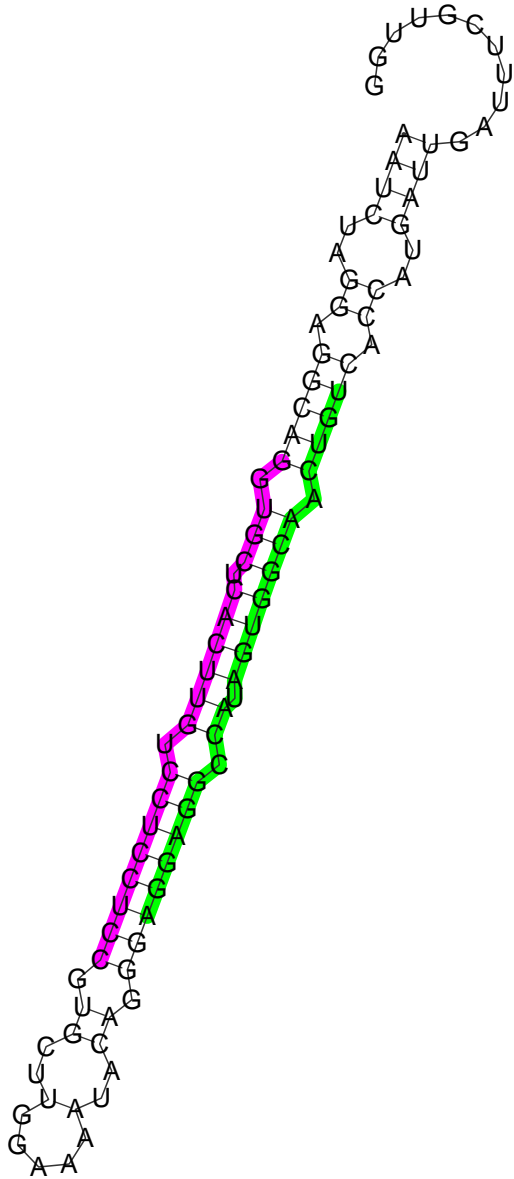





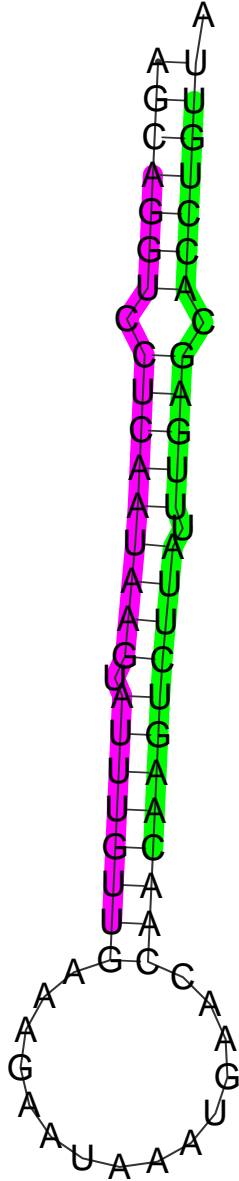



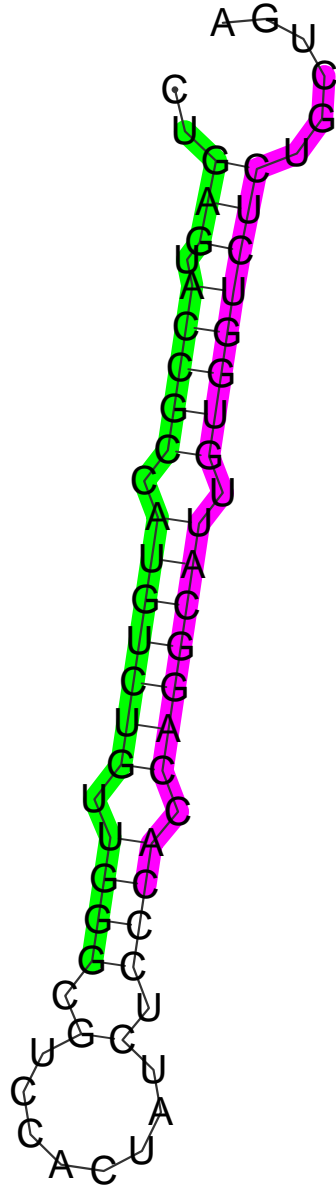

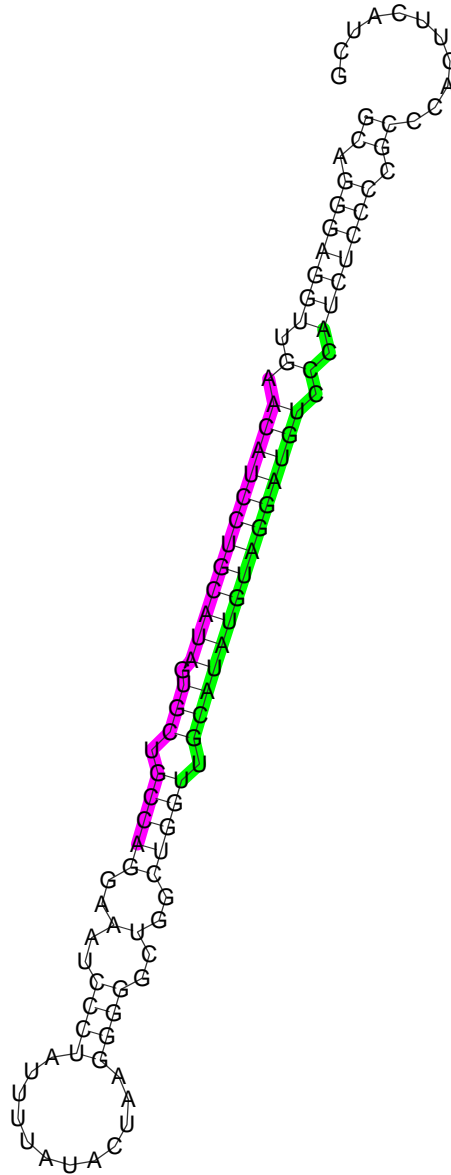

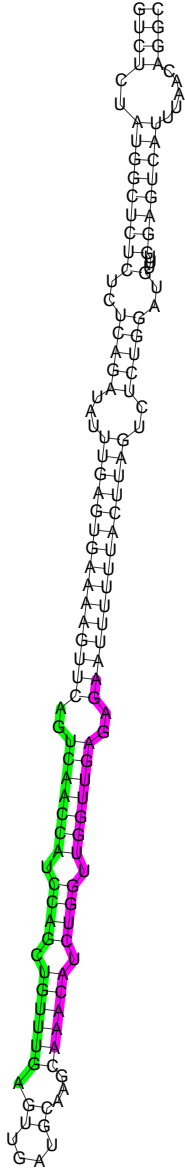

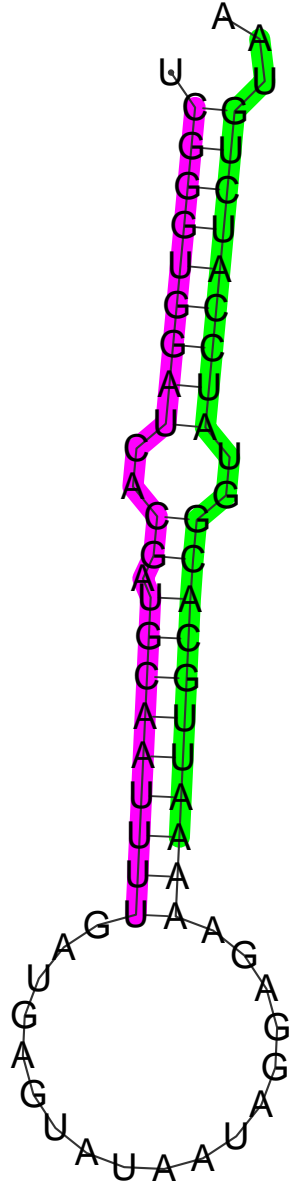



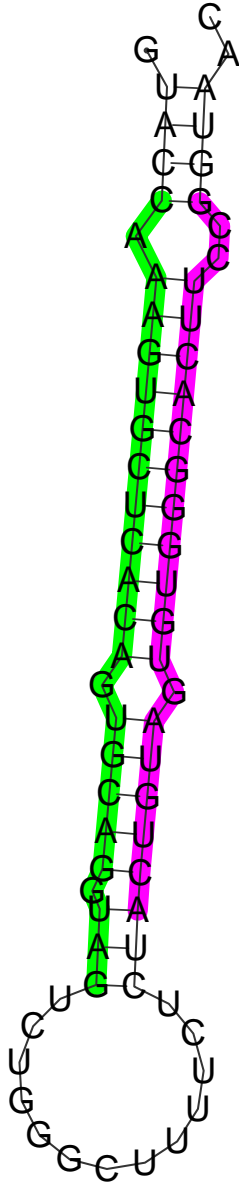







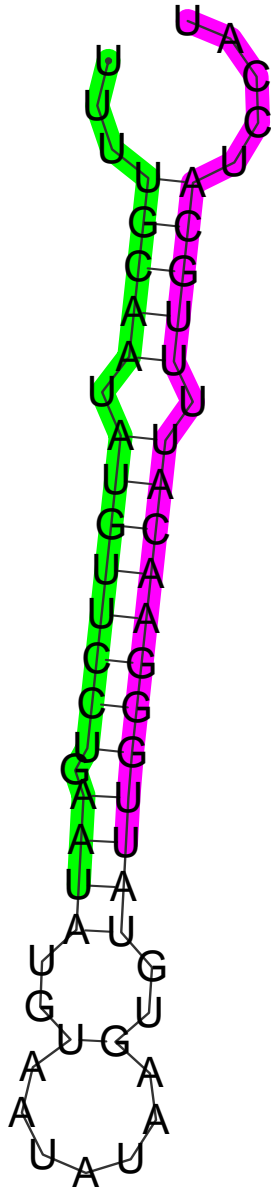

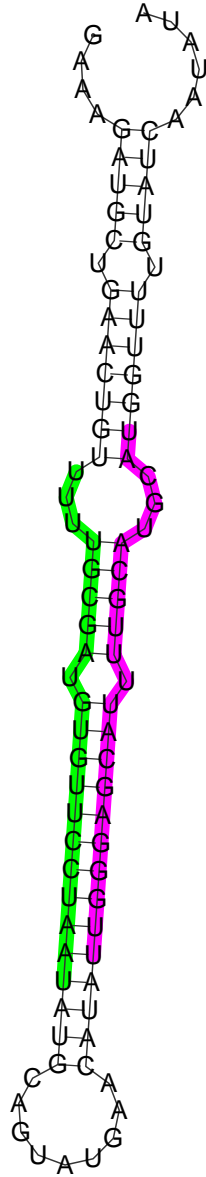

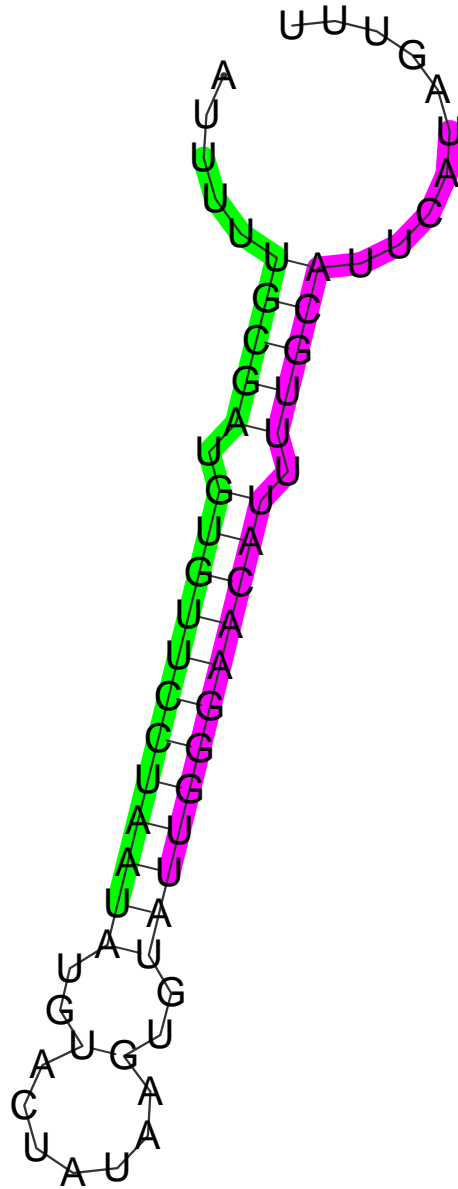

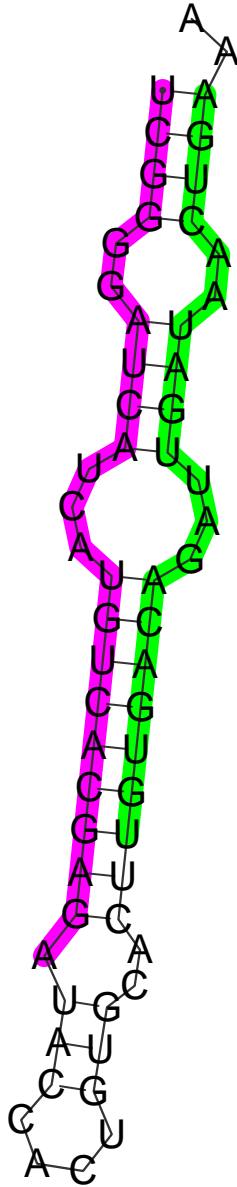

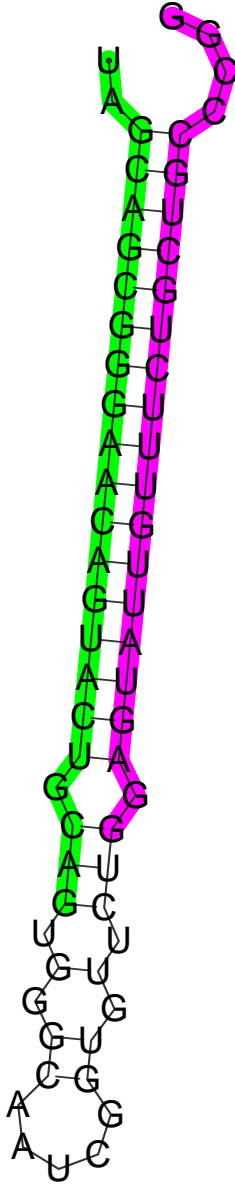

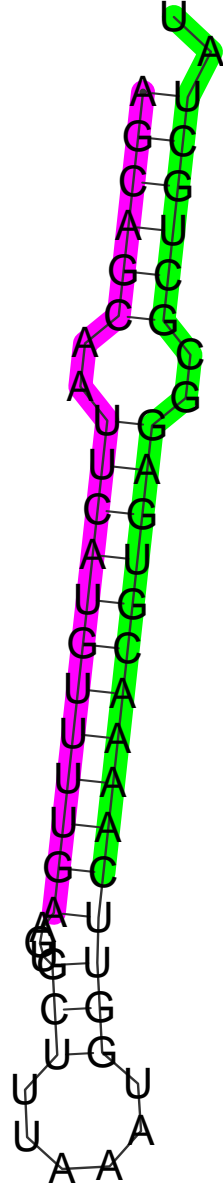



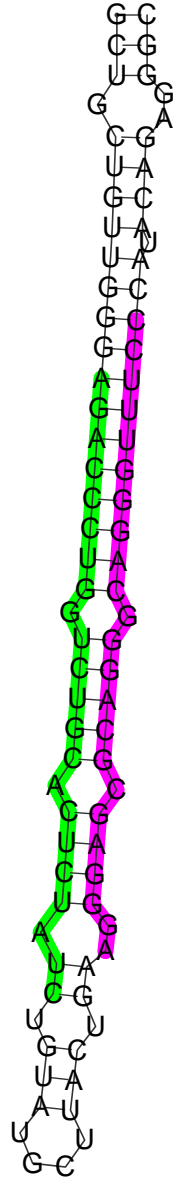

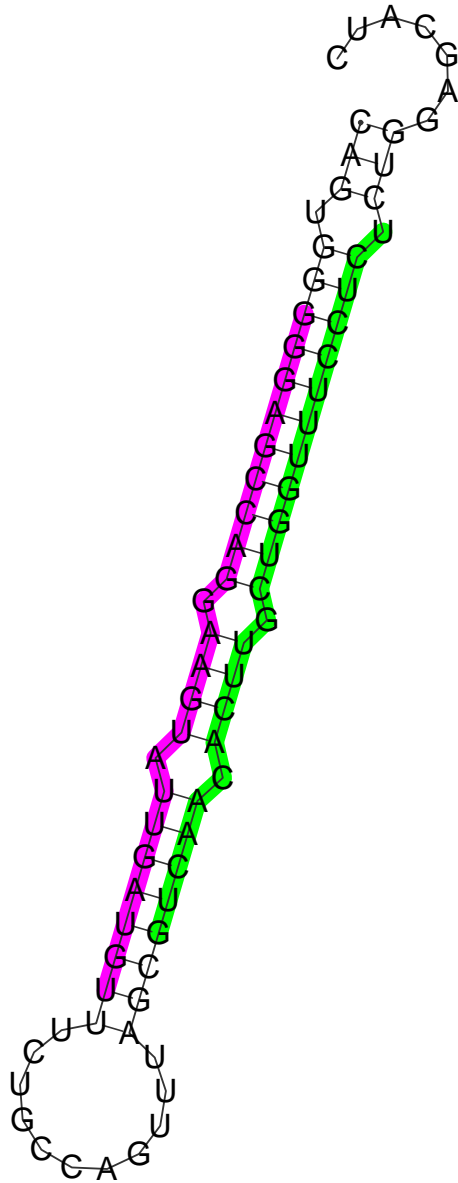

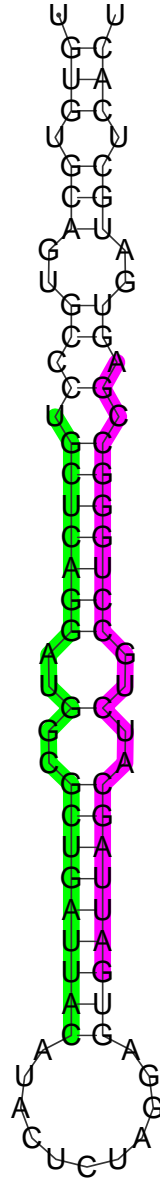

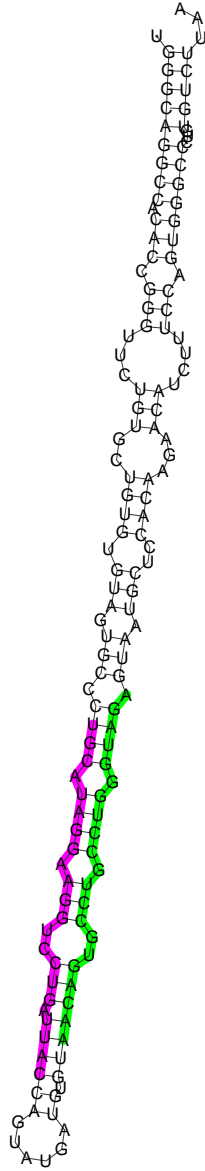

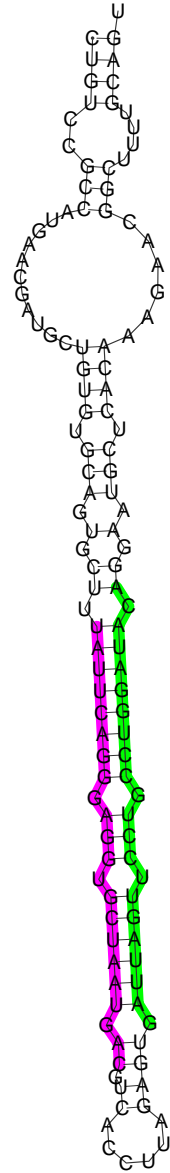

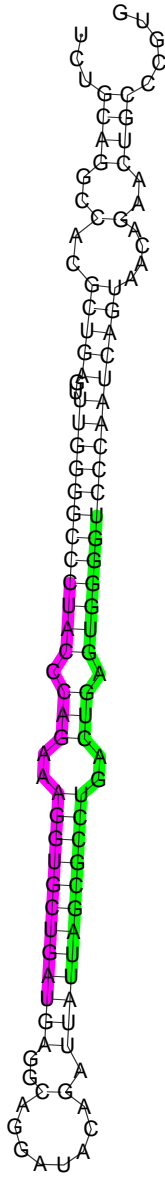

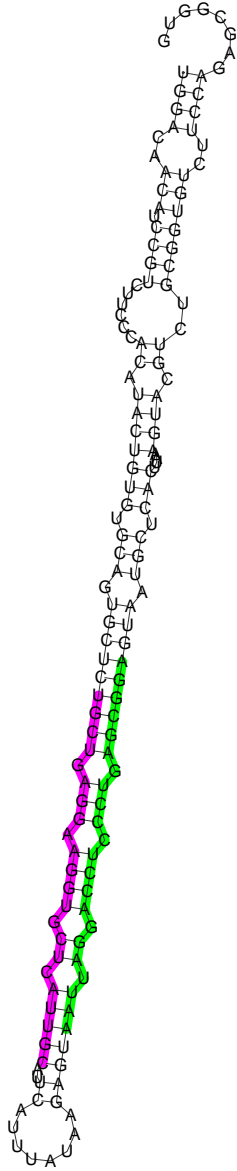

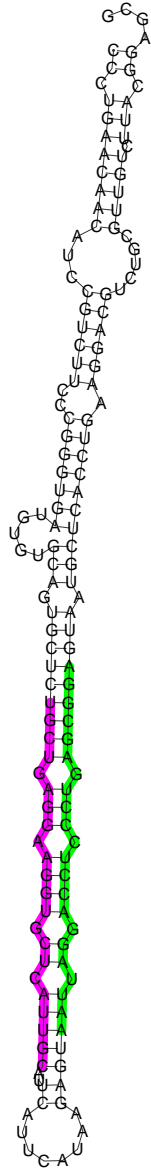



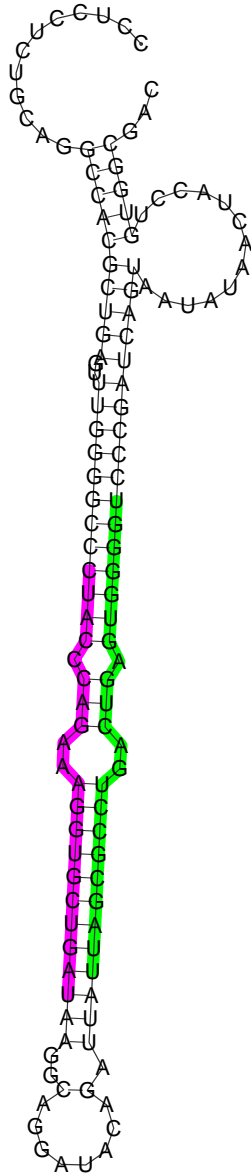

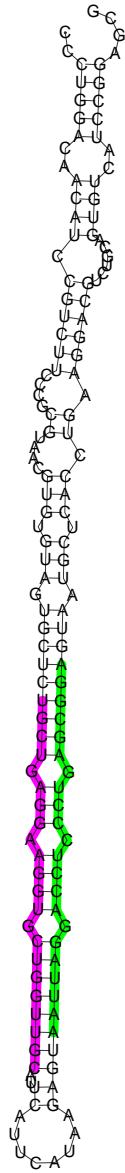





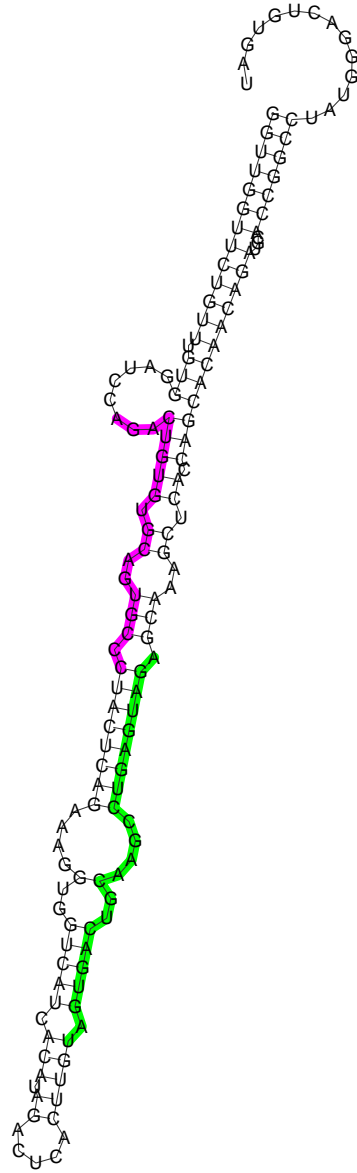



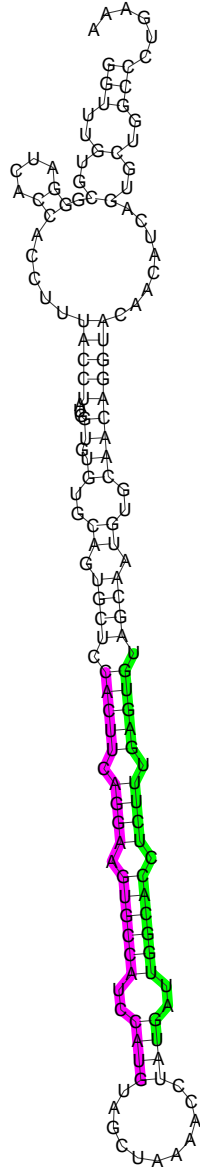

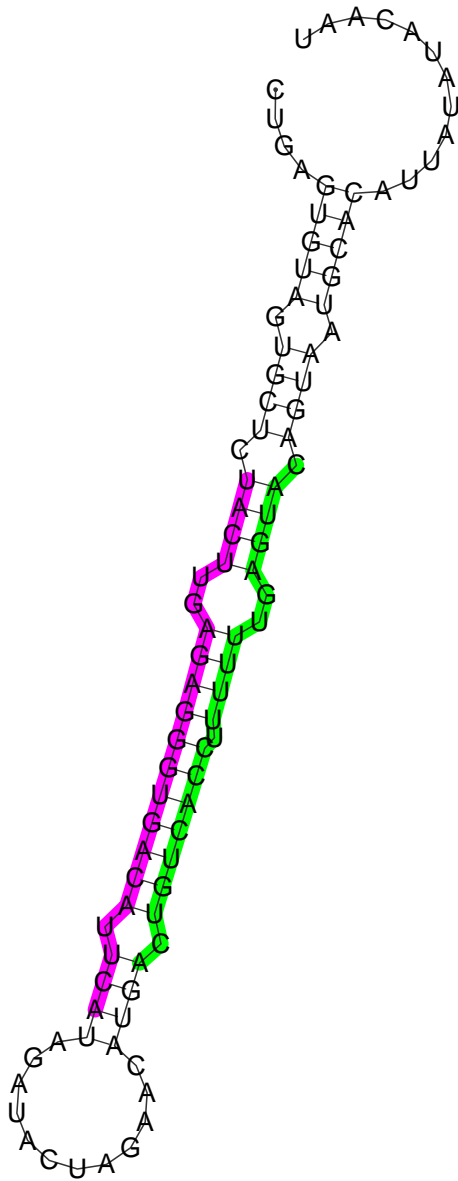





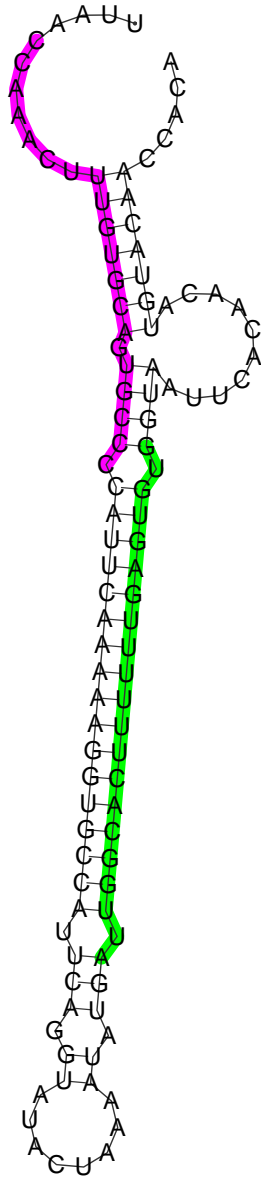

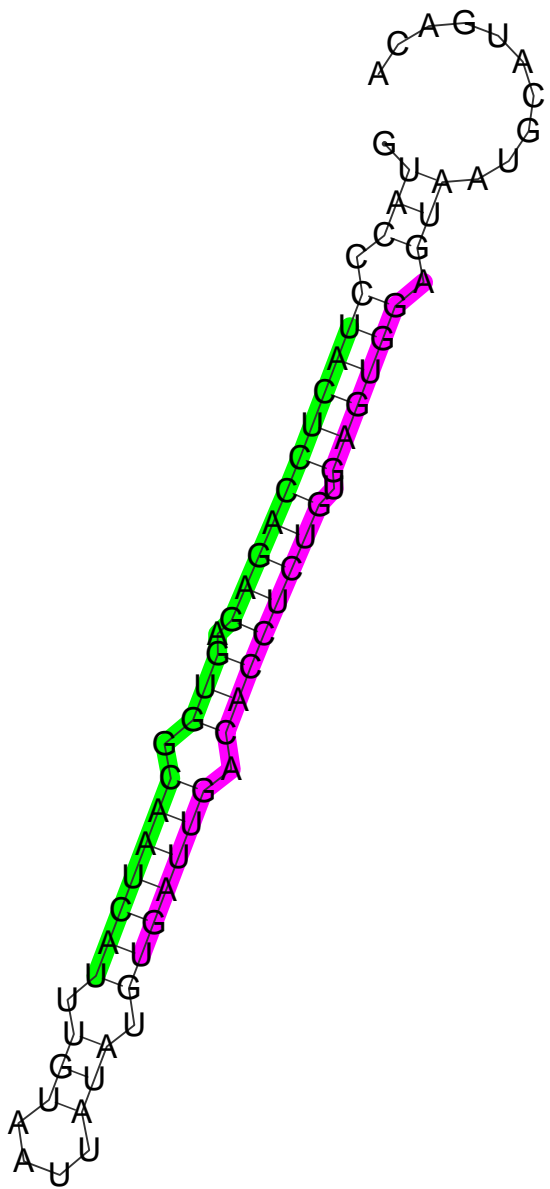

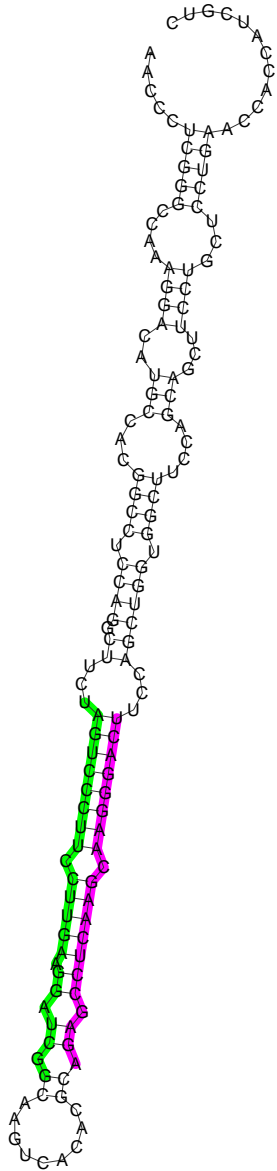

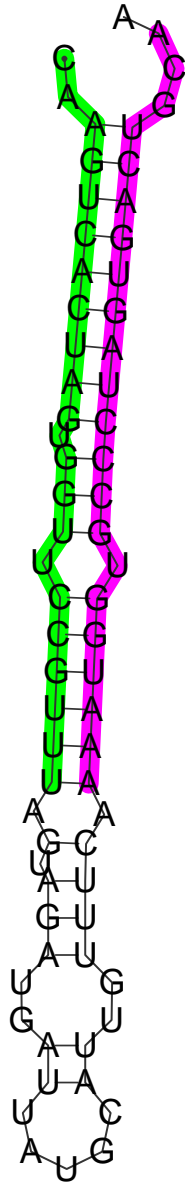

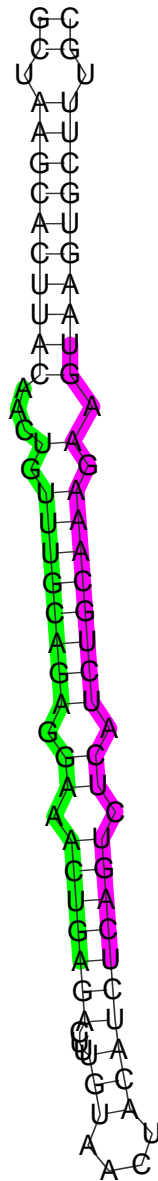



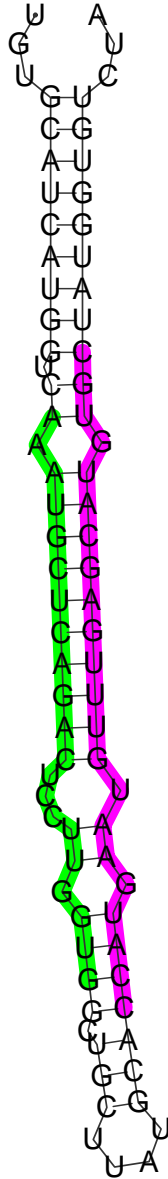





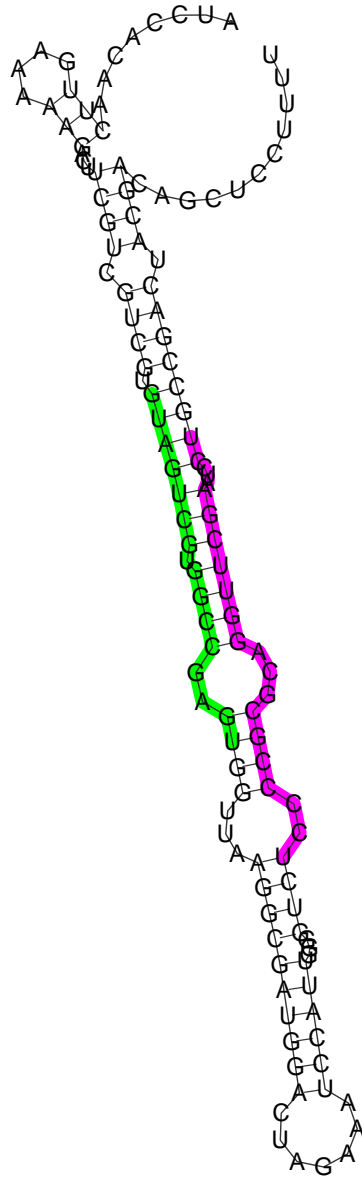

Supplement: pone.0153453.s007.pdf [file pone.0153453.s007.pdf]
