# Supplementary material for: An Improved microRNA Annotation of the Canine Genome
Source: PubMed Central journal article supplement (PMC4847789; doi:10.1371/journal.pone.0153453), 2016-04-27

# Blood

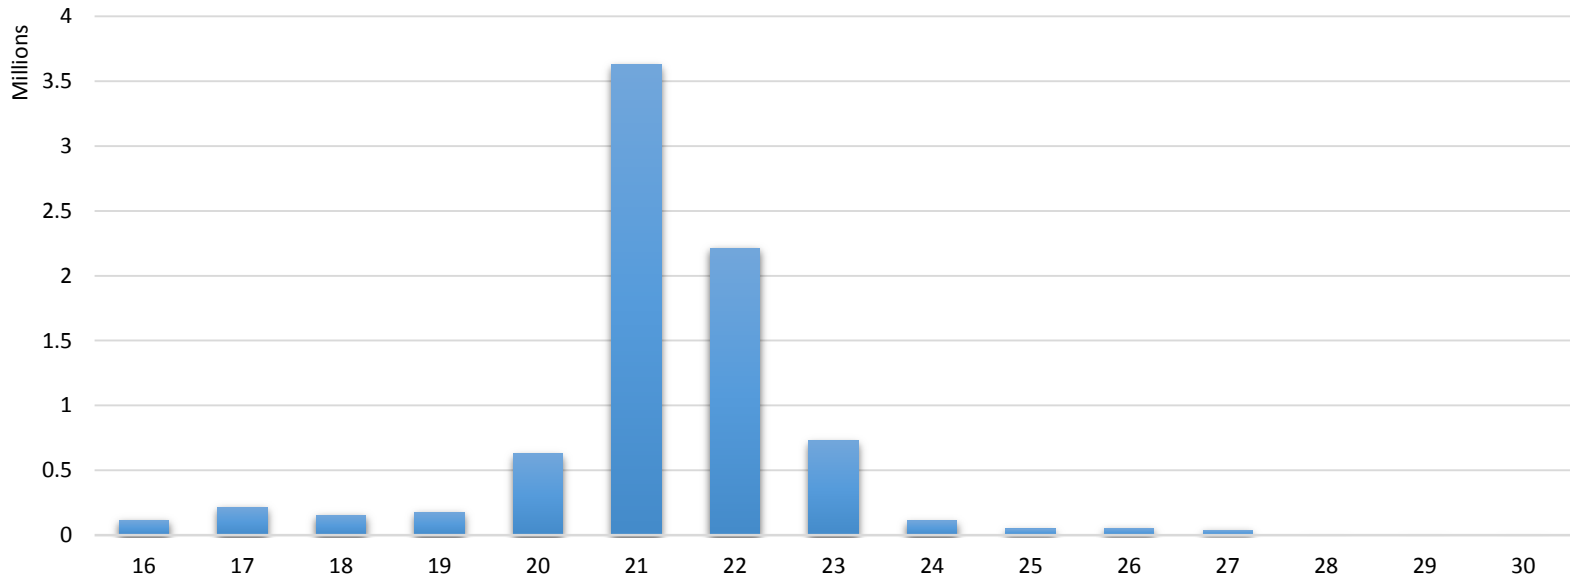

# Brain

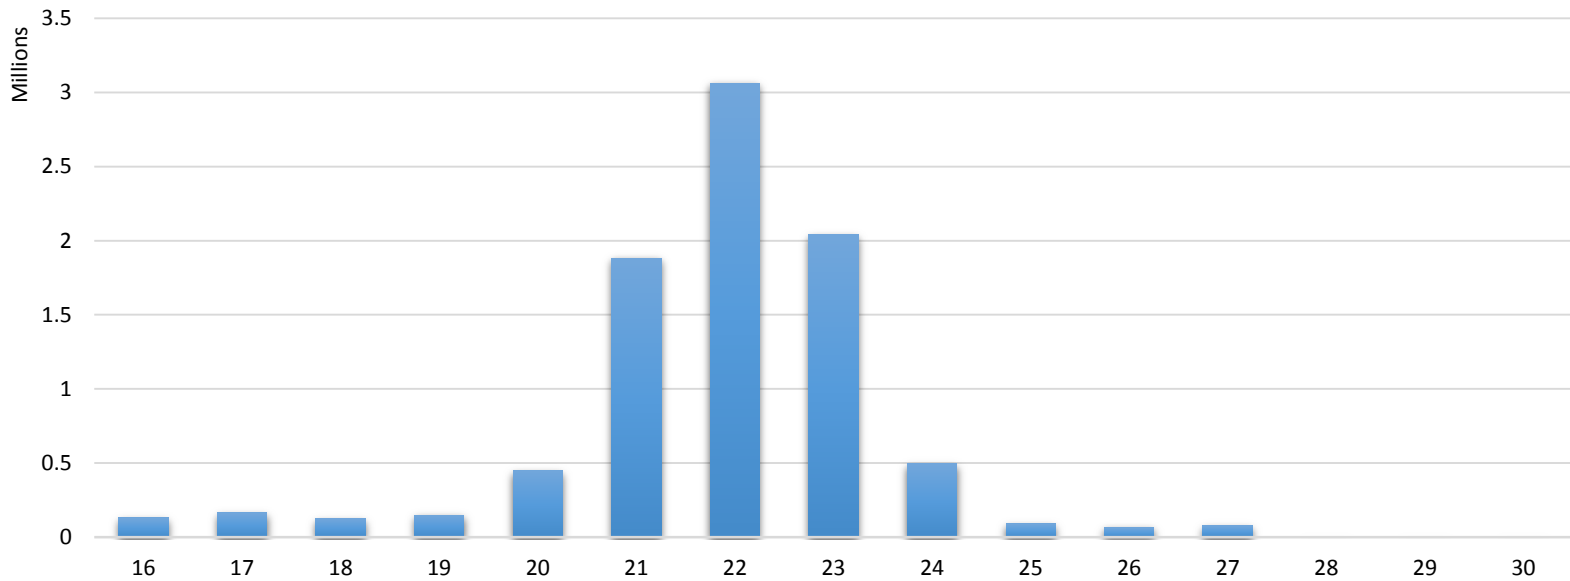

# Heart

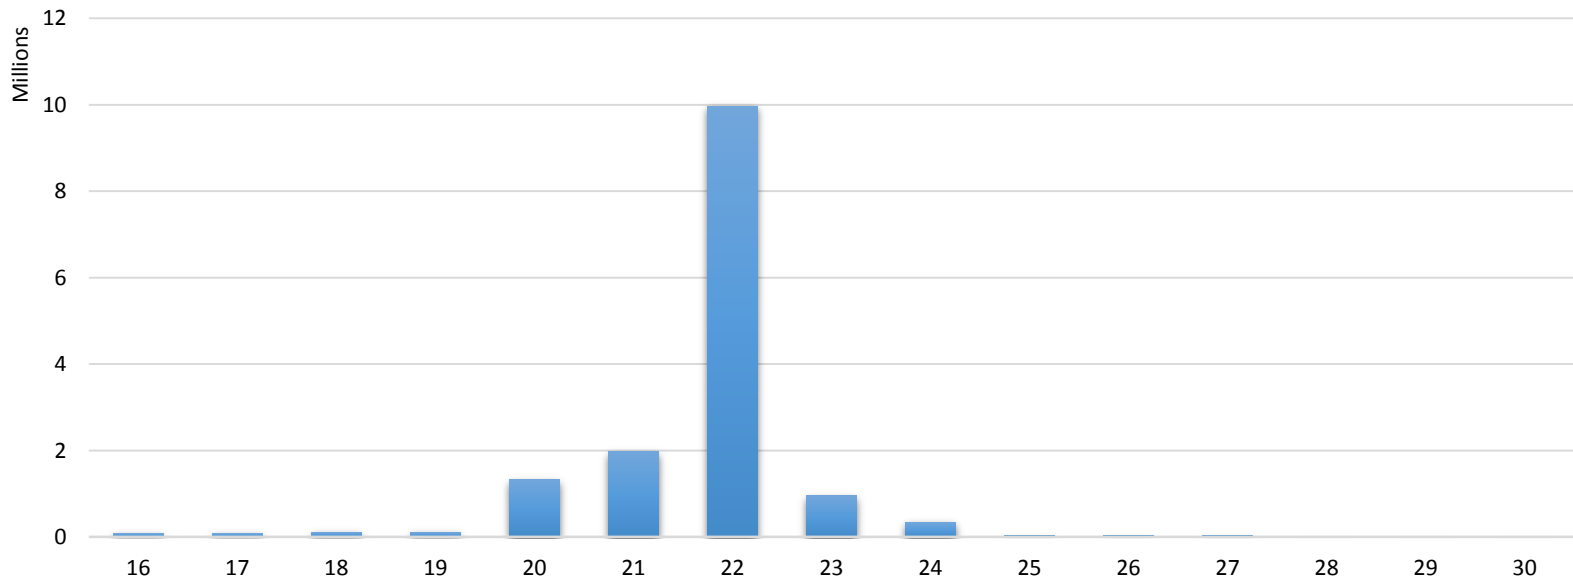

# Kidney

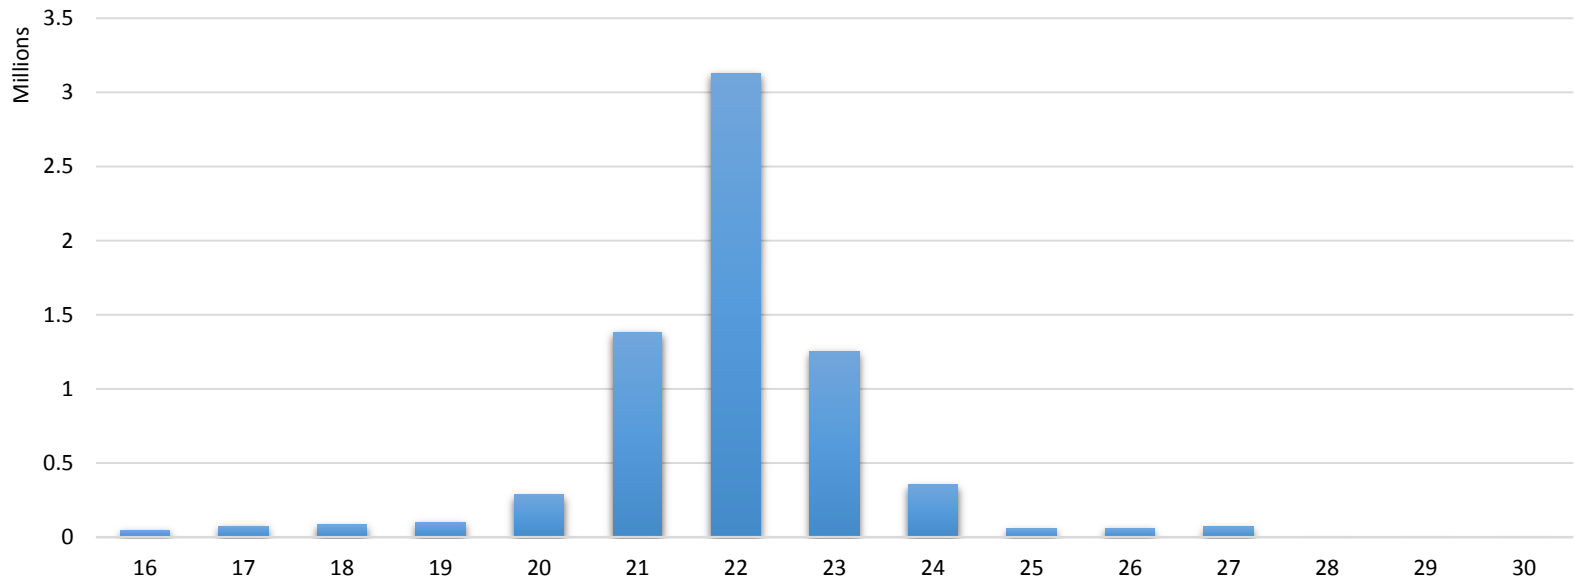

# Lung

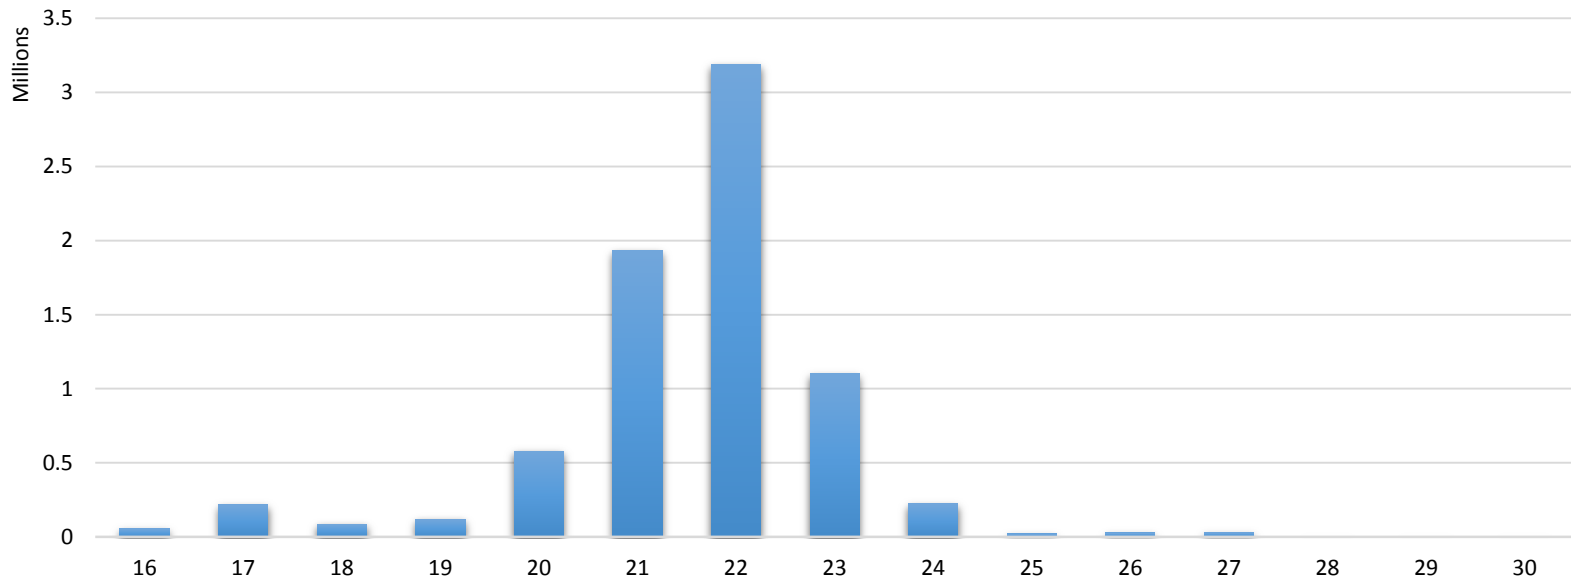

# Ovary

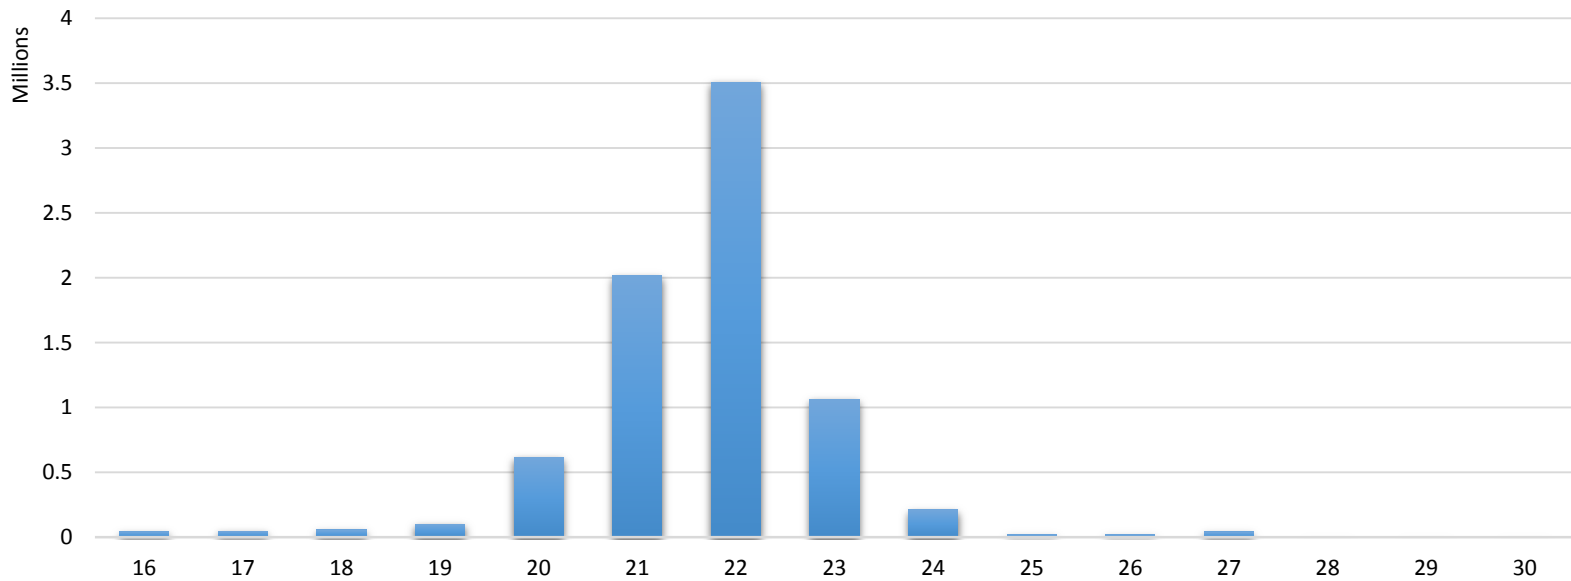

# Skin

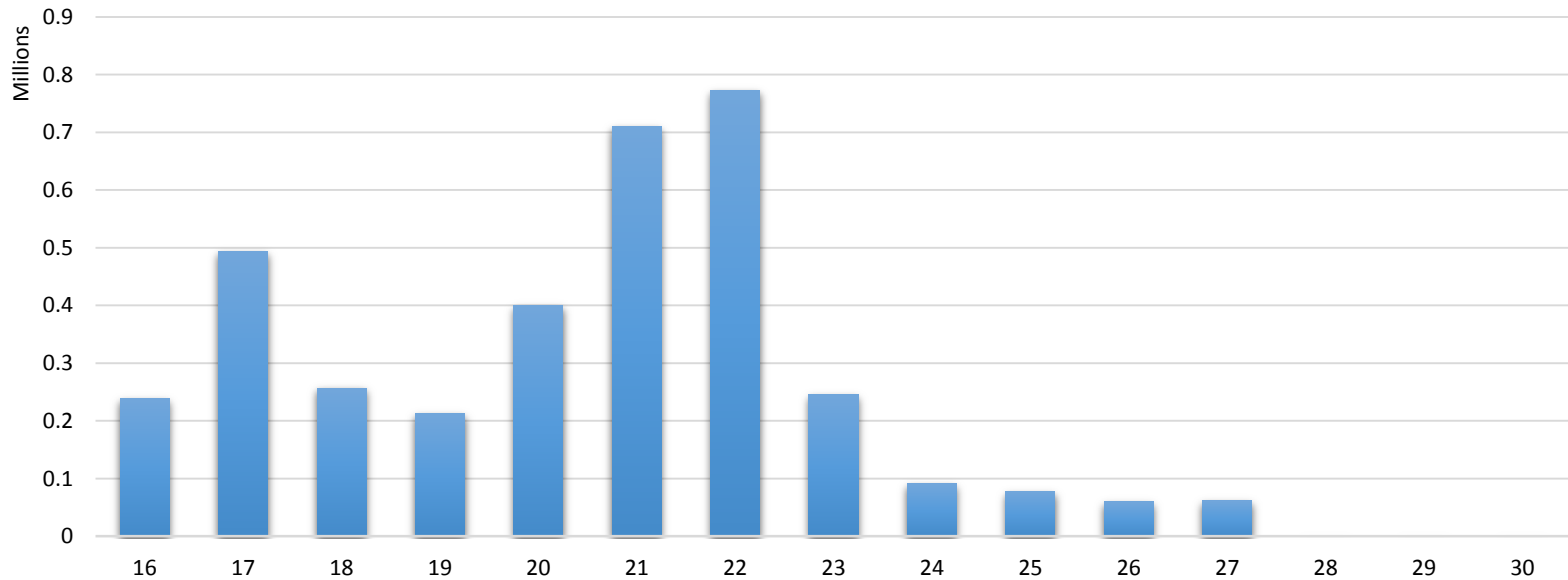

# Smooth Muscle

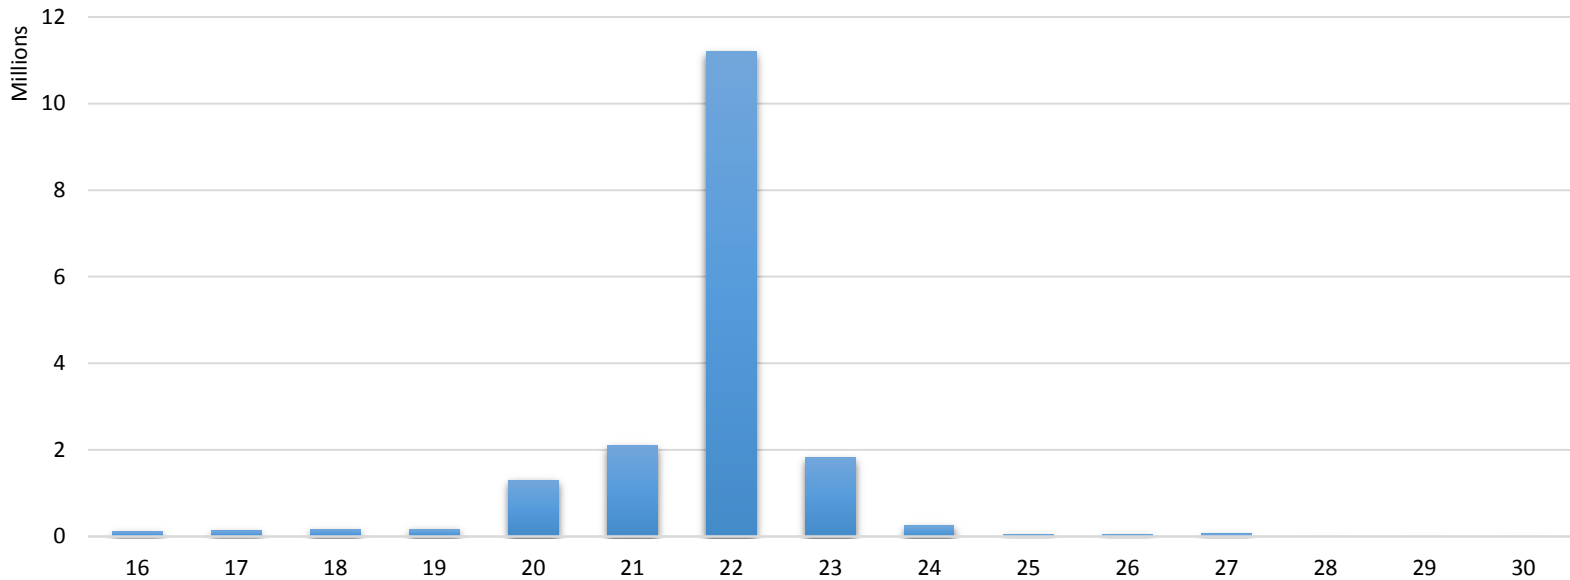



# Testis

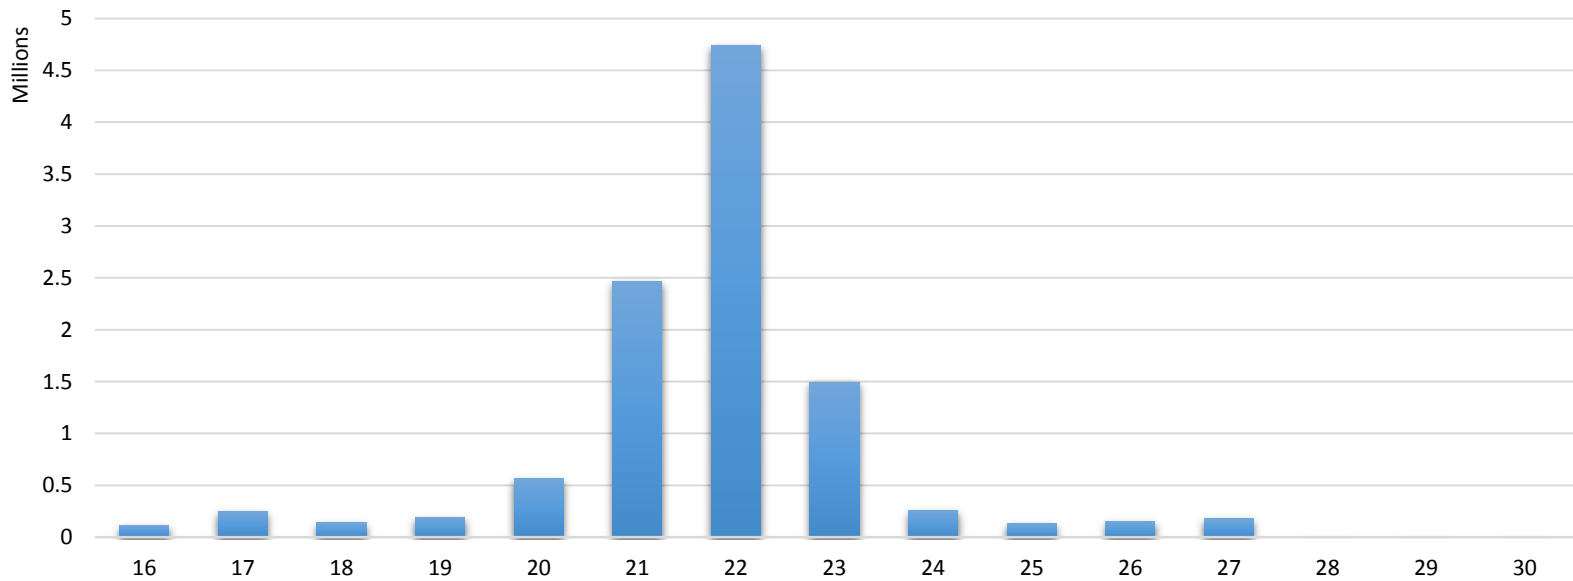

Supplement: pone.0153453.s002.pdf [file pone.0153453.s002.pdf]
