# Supplementary material for: An Improved microRNA Annotation of the Canine Genome
Source: PubMed Central journal article supplement (PMC4847789; doi:10.1371/journal.pone.0153453), 2016-04-27
Supplement: pone.0153453.s005.pdf [file pone.0153453.s005.pdf]

# 1\_17593857-17593917(+)\_miR-3591\_high

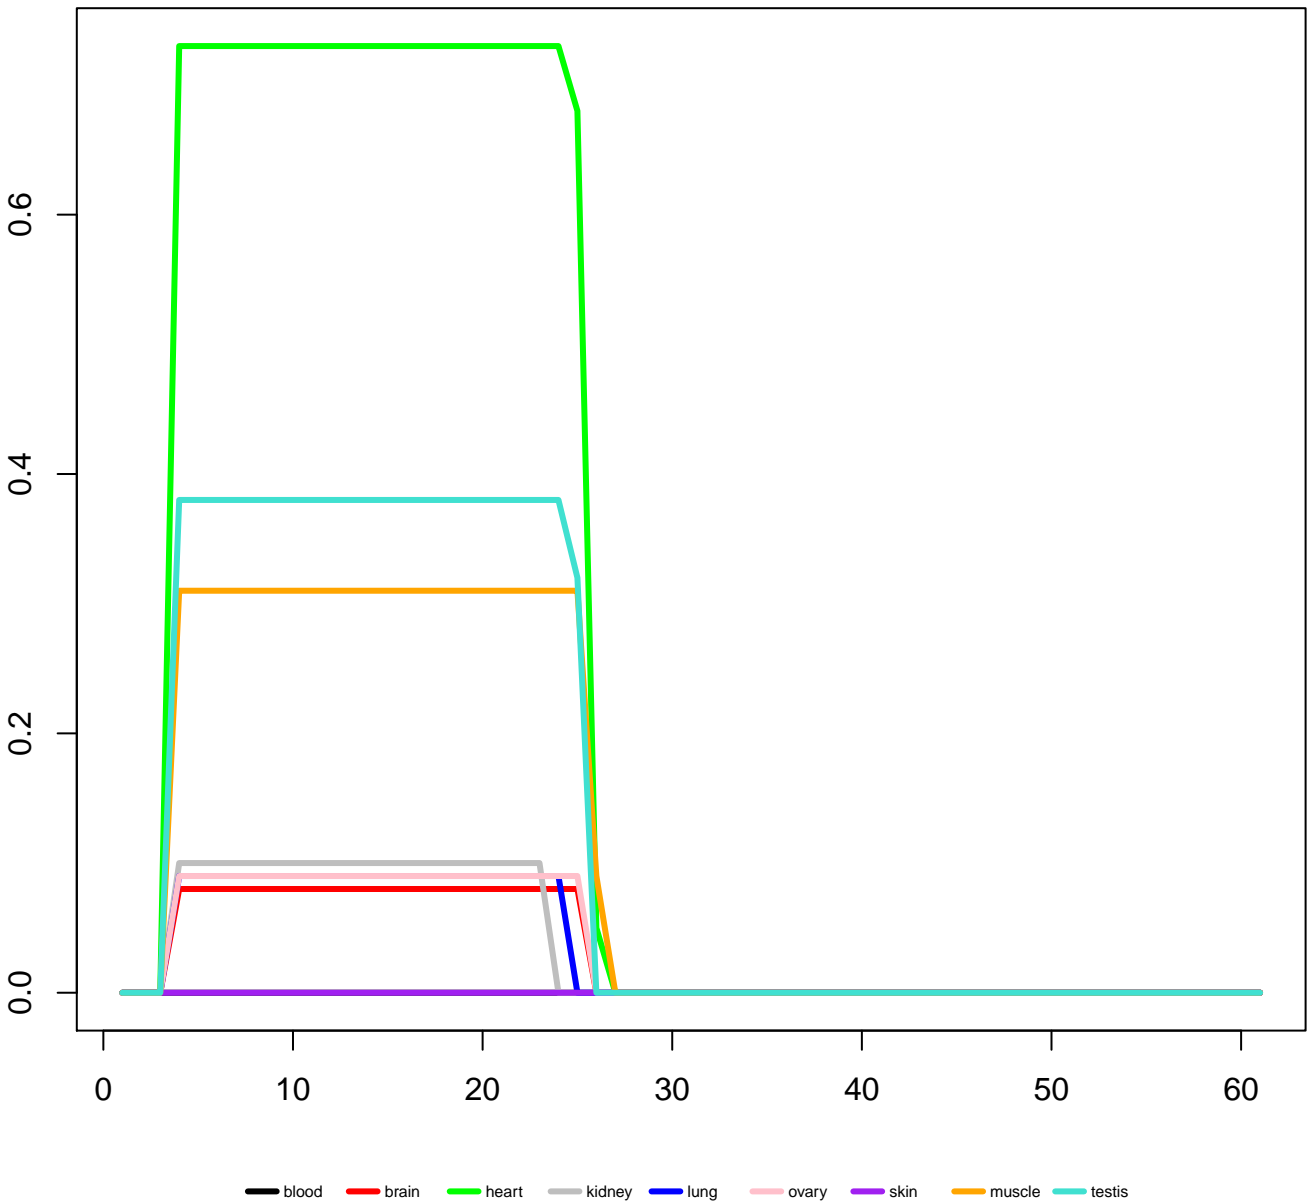



# 1\_44444979-44445123(-)\_cfa-mir-8873b\_low

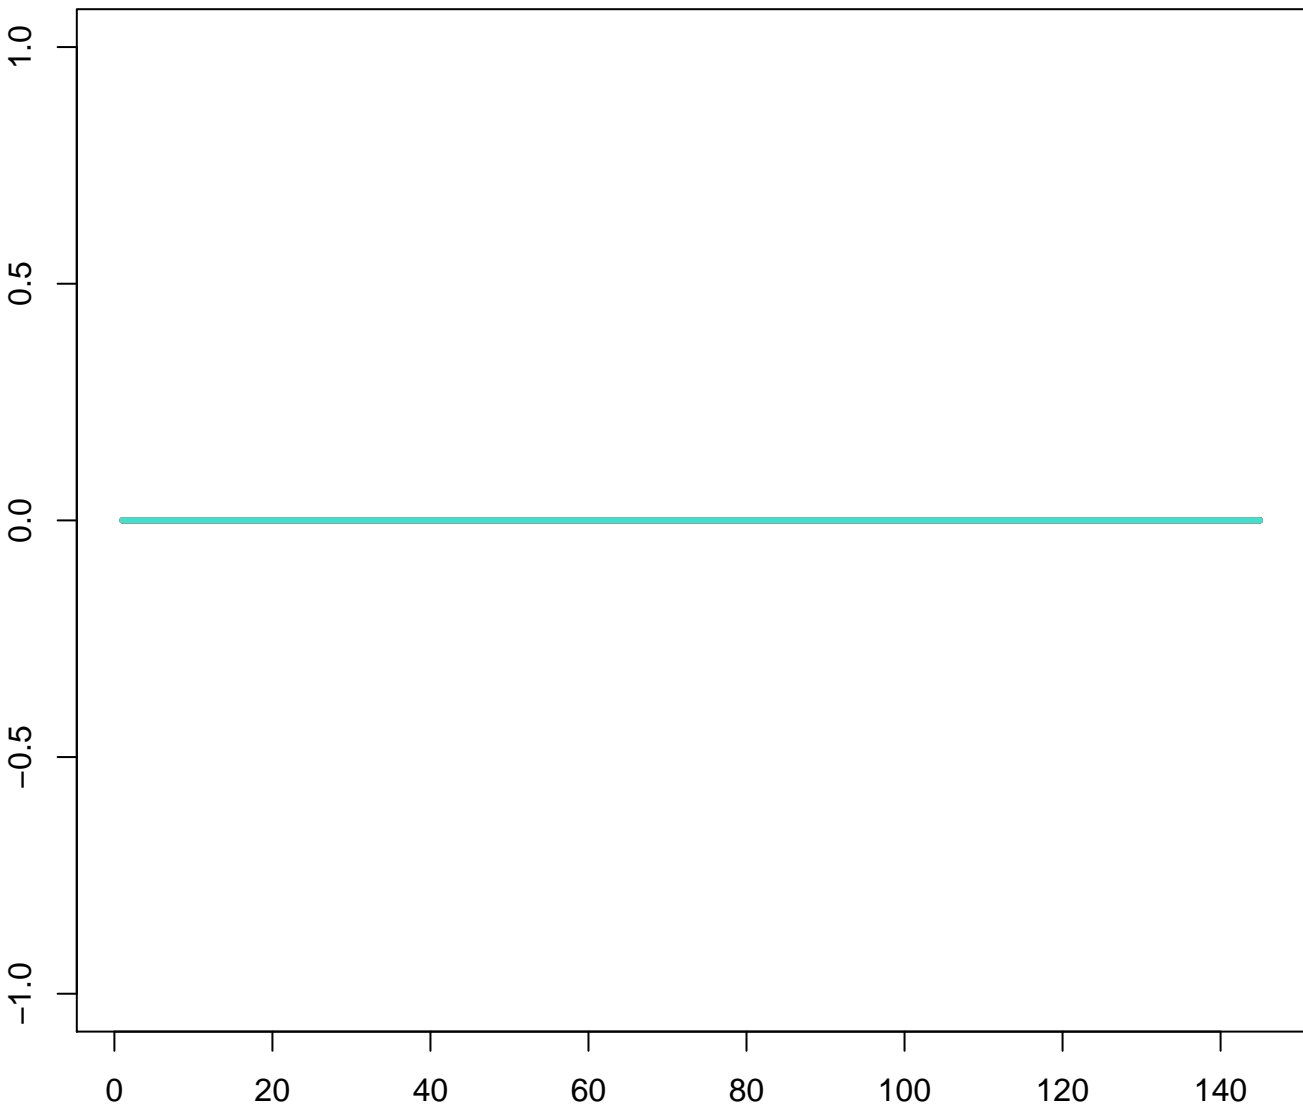

blood brain heart kidney lung ovary skin muscle testis



# 1\_71677608-71677669(-)\_cfa-mir-24-1\_high

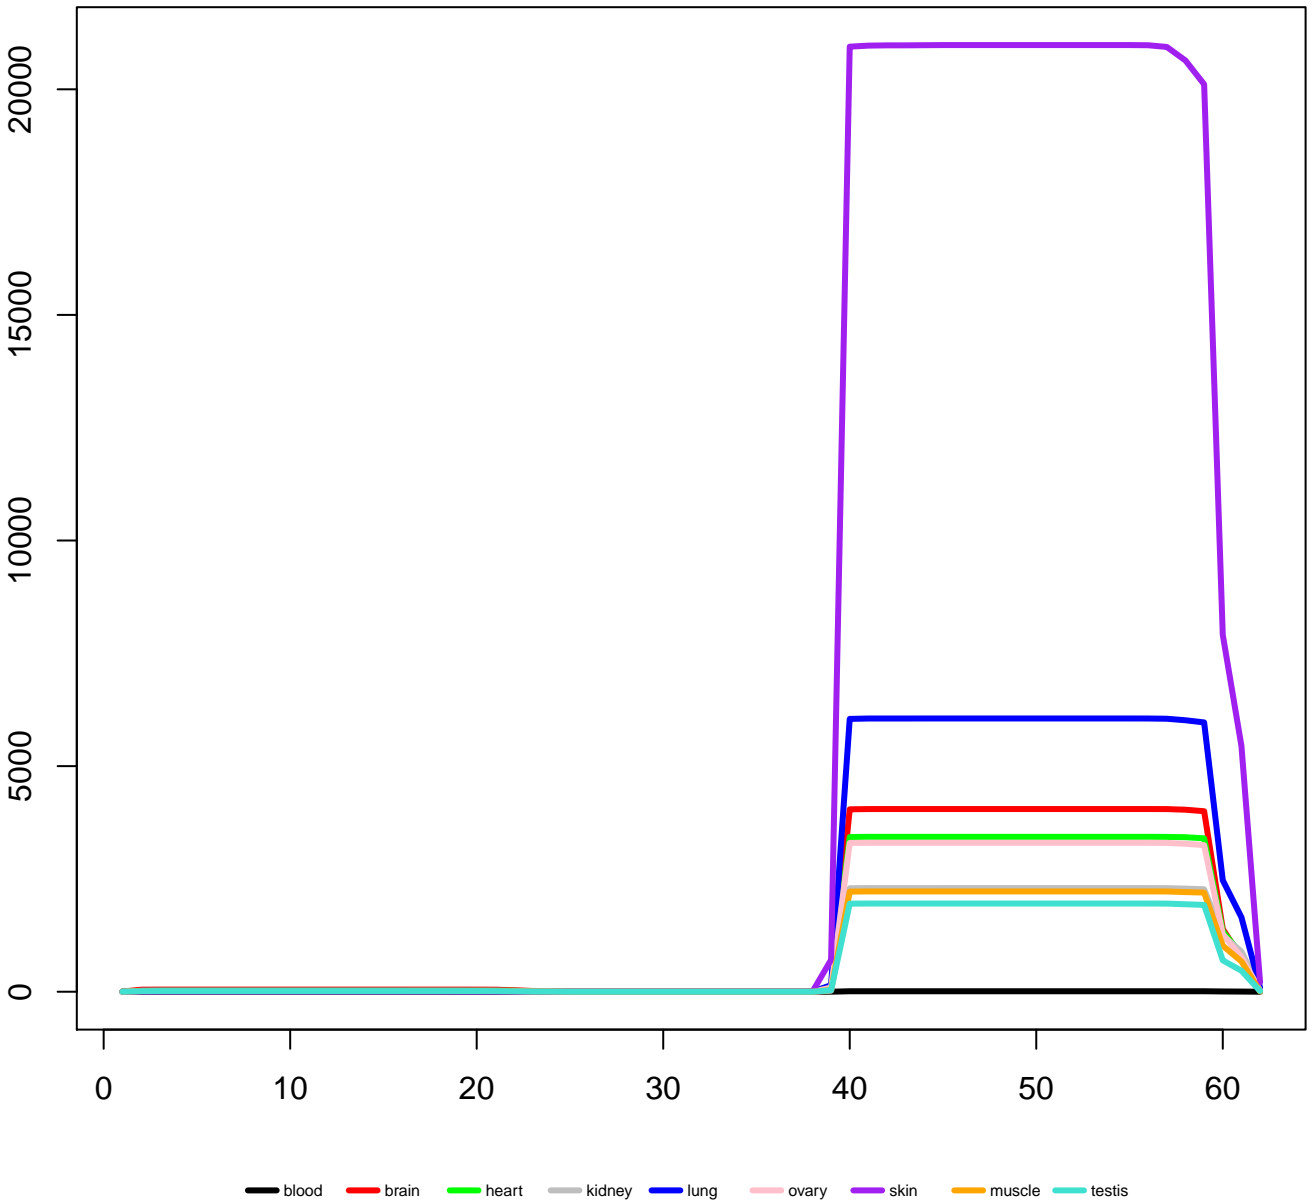



# 1\_71678117-71678179(-)\_cfa-mir-27b\_high

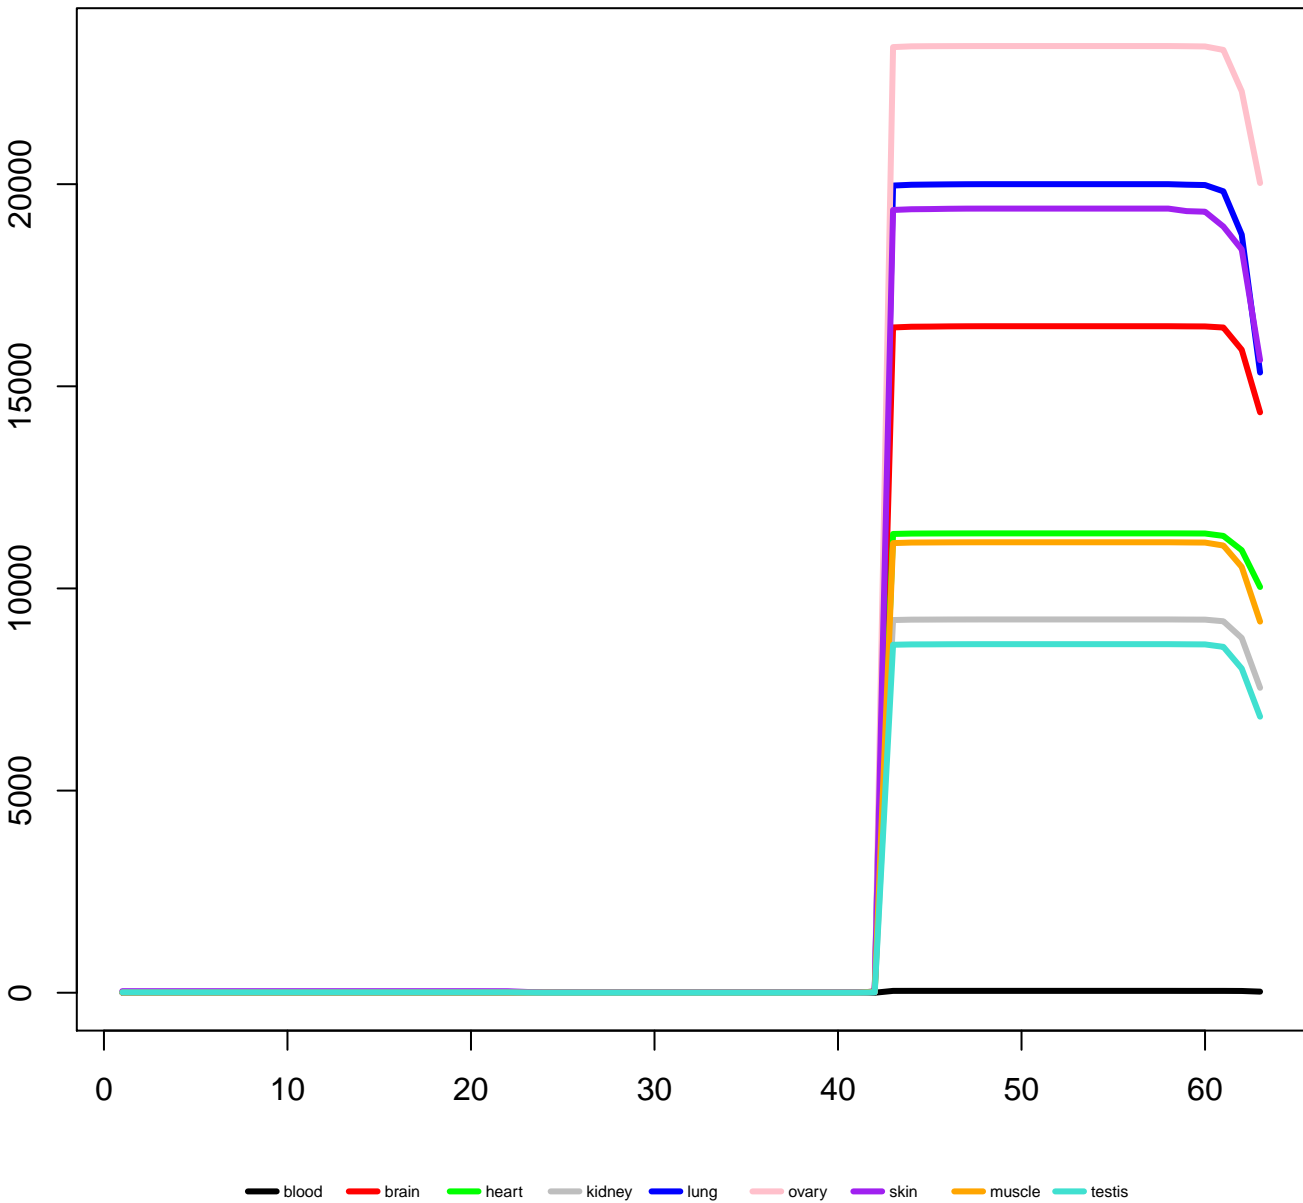

# 1\_71678353-71678406(-)\_cfa-mir-23b\_high

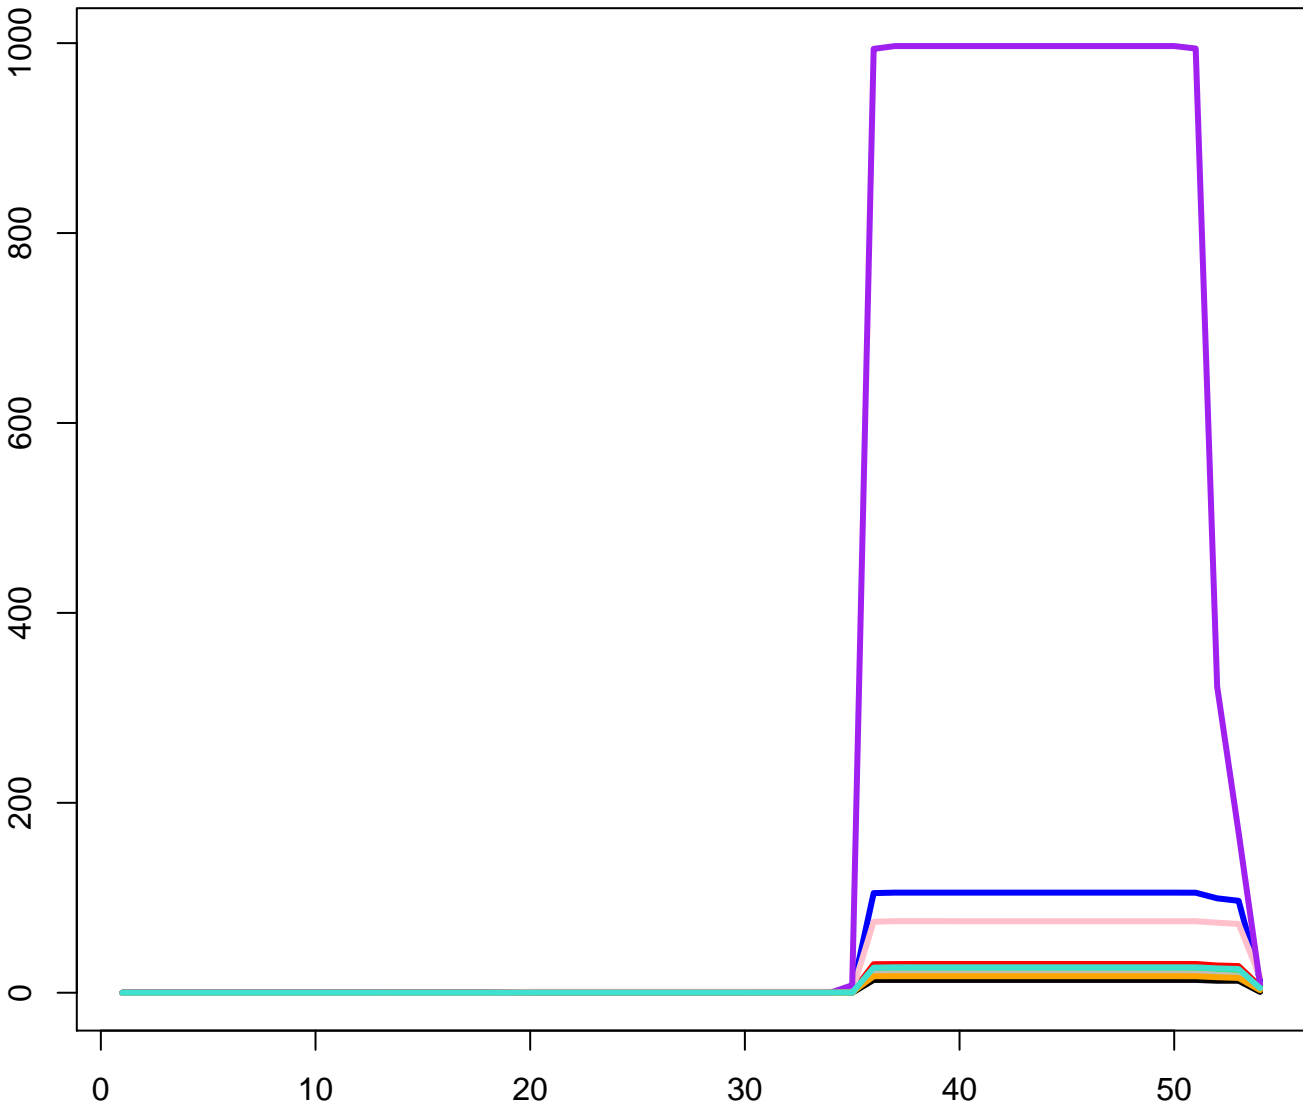

blood brain heart kidney lung ovary skin muscle testis



# 1\_75509765-75509828(+)\_cfa-mir-7-1\_high

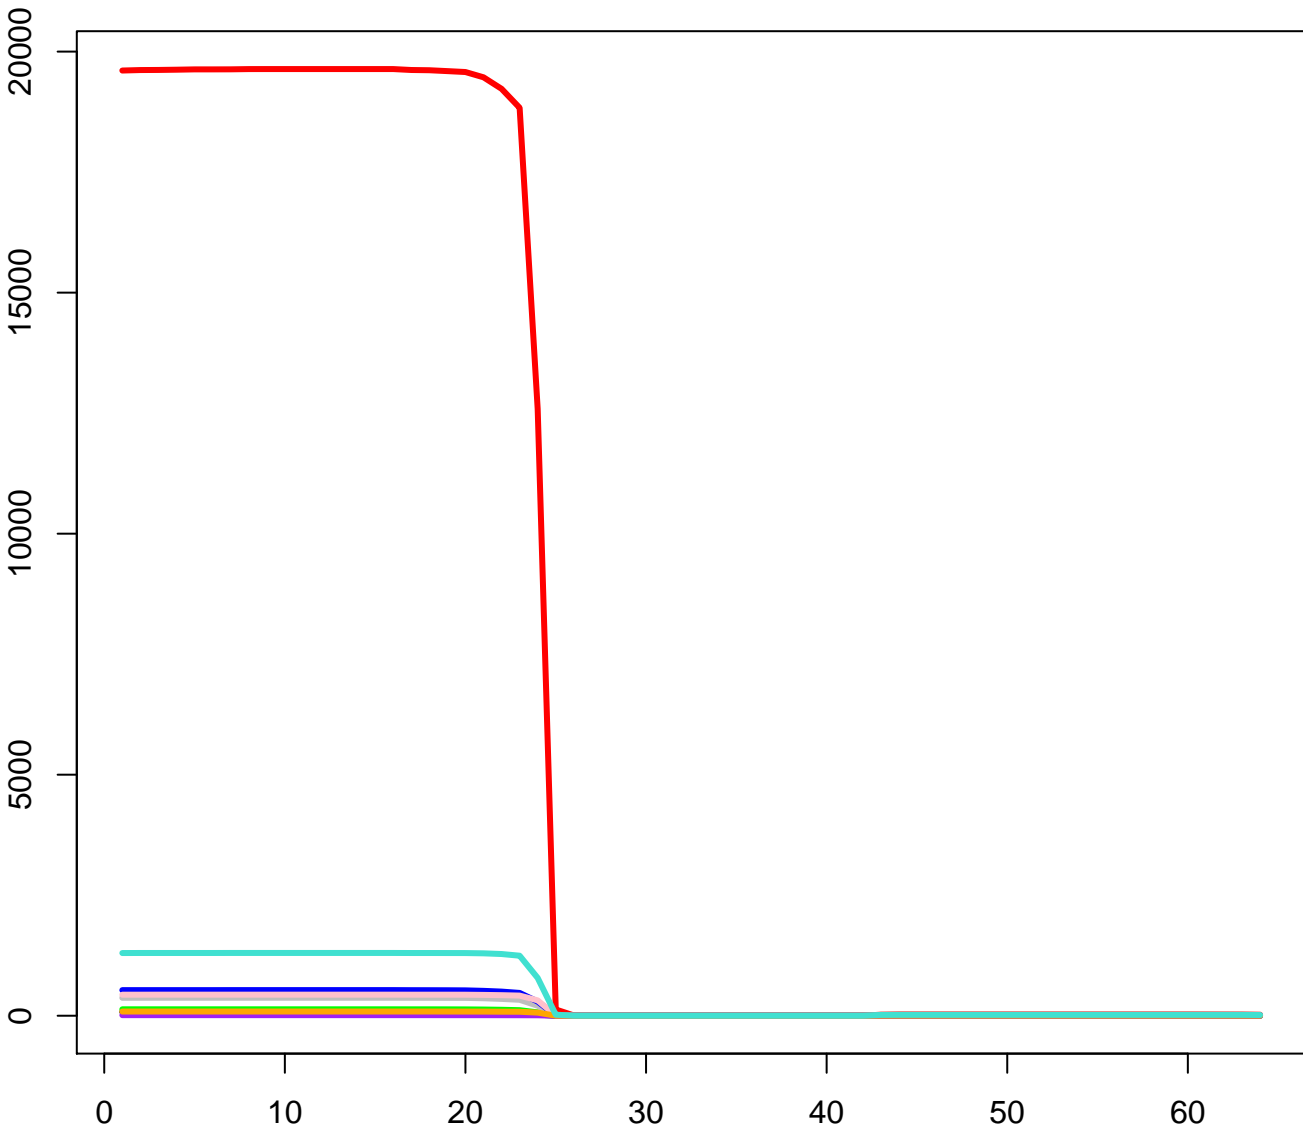

— blood — brain — heart — kidney — lung — ovary — skin — muscle — testis

# 1\_86818494-86818553(+)\_cfa-mir-204\_high

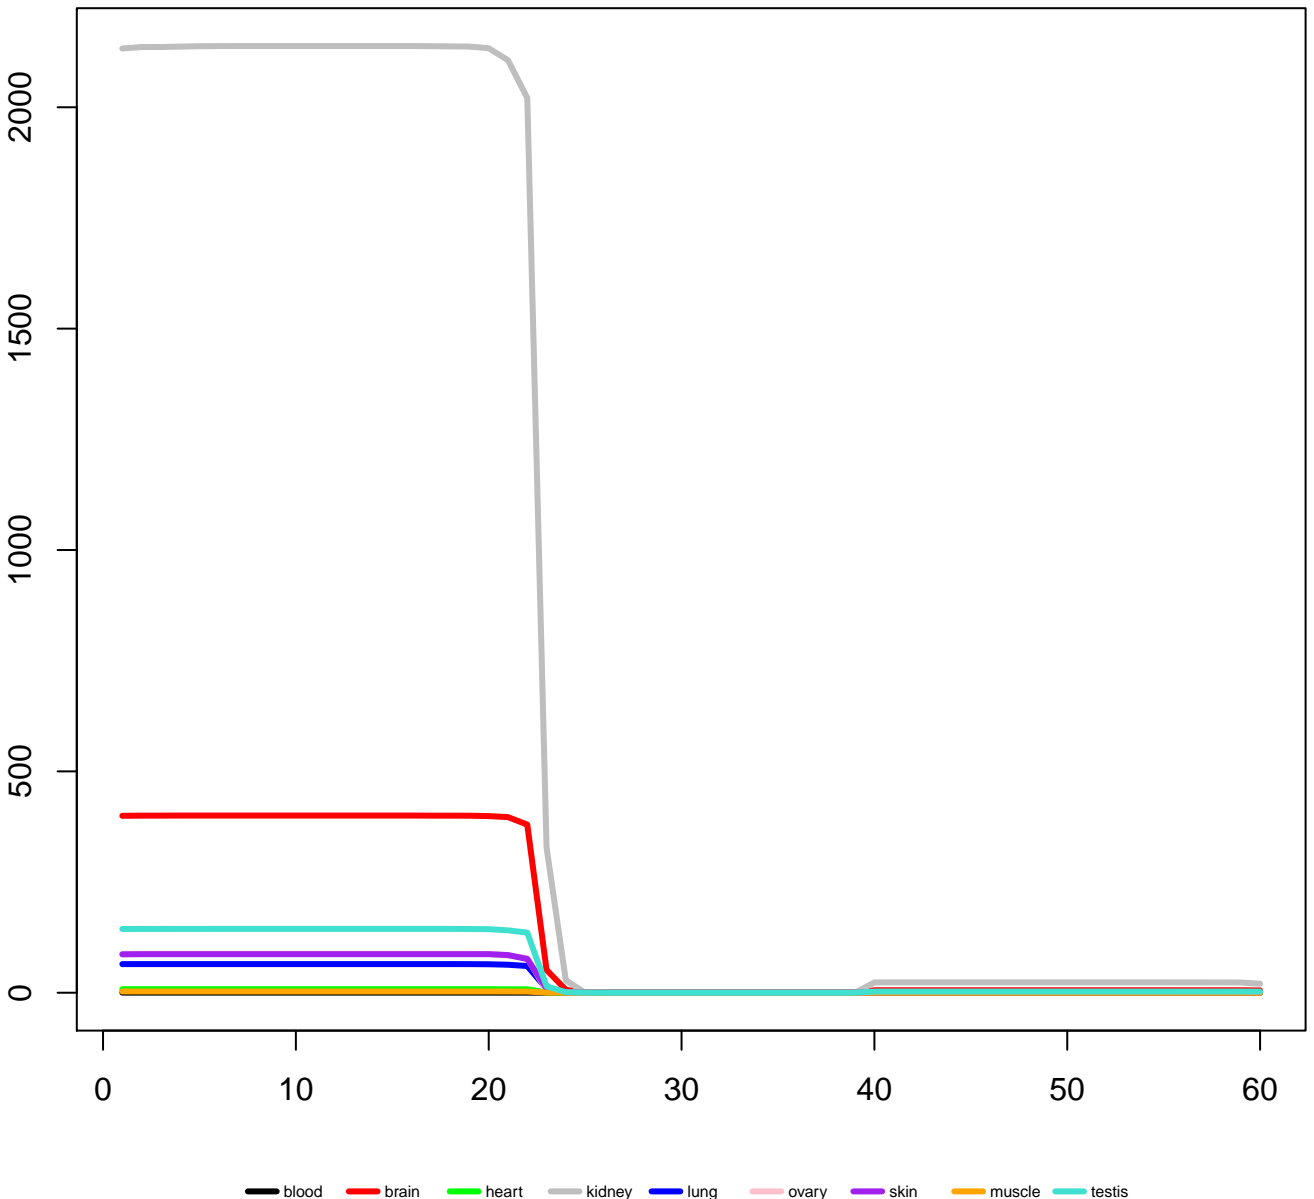

— blood — brain — heart — kidney — lung — ovary — skin — muscle — testis

# 1\_93194328-93194382(+)\_cfa-mir-101-2\_high

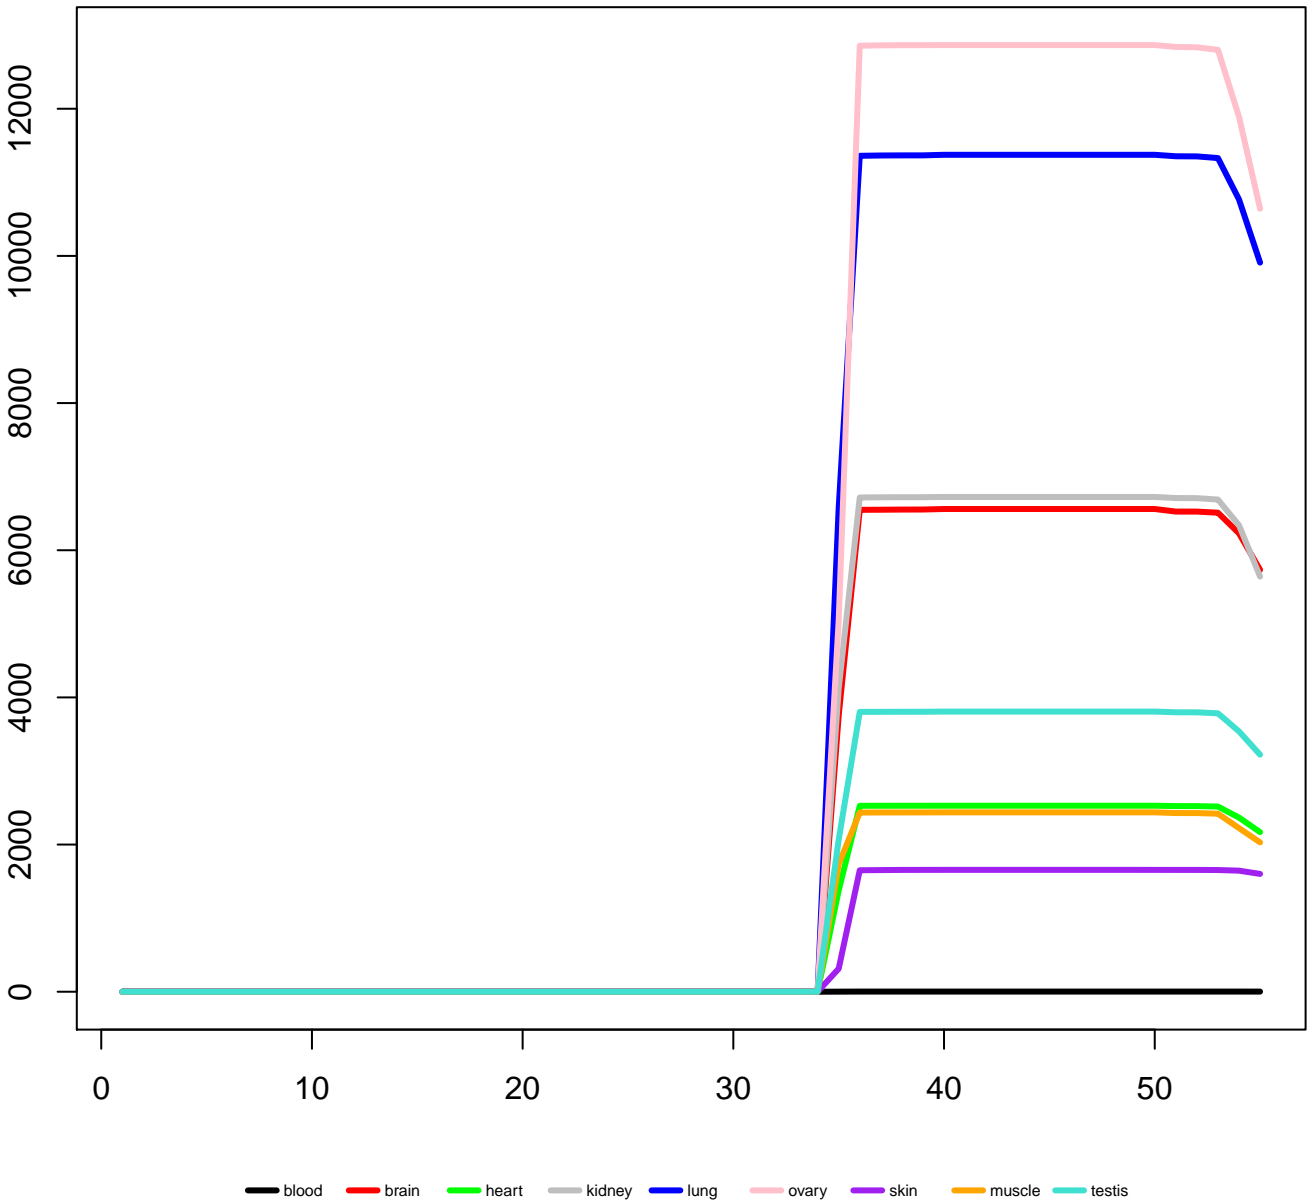

# 1\_97902012-97902136(-)\_cfa-let-7d\_high

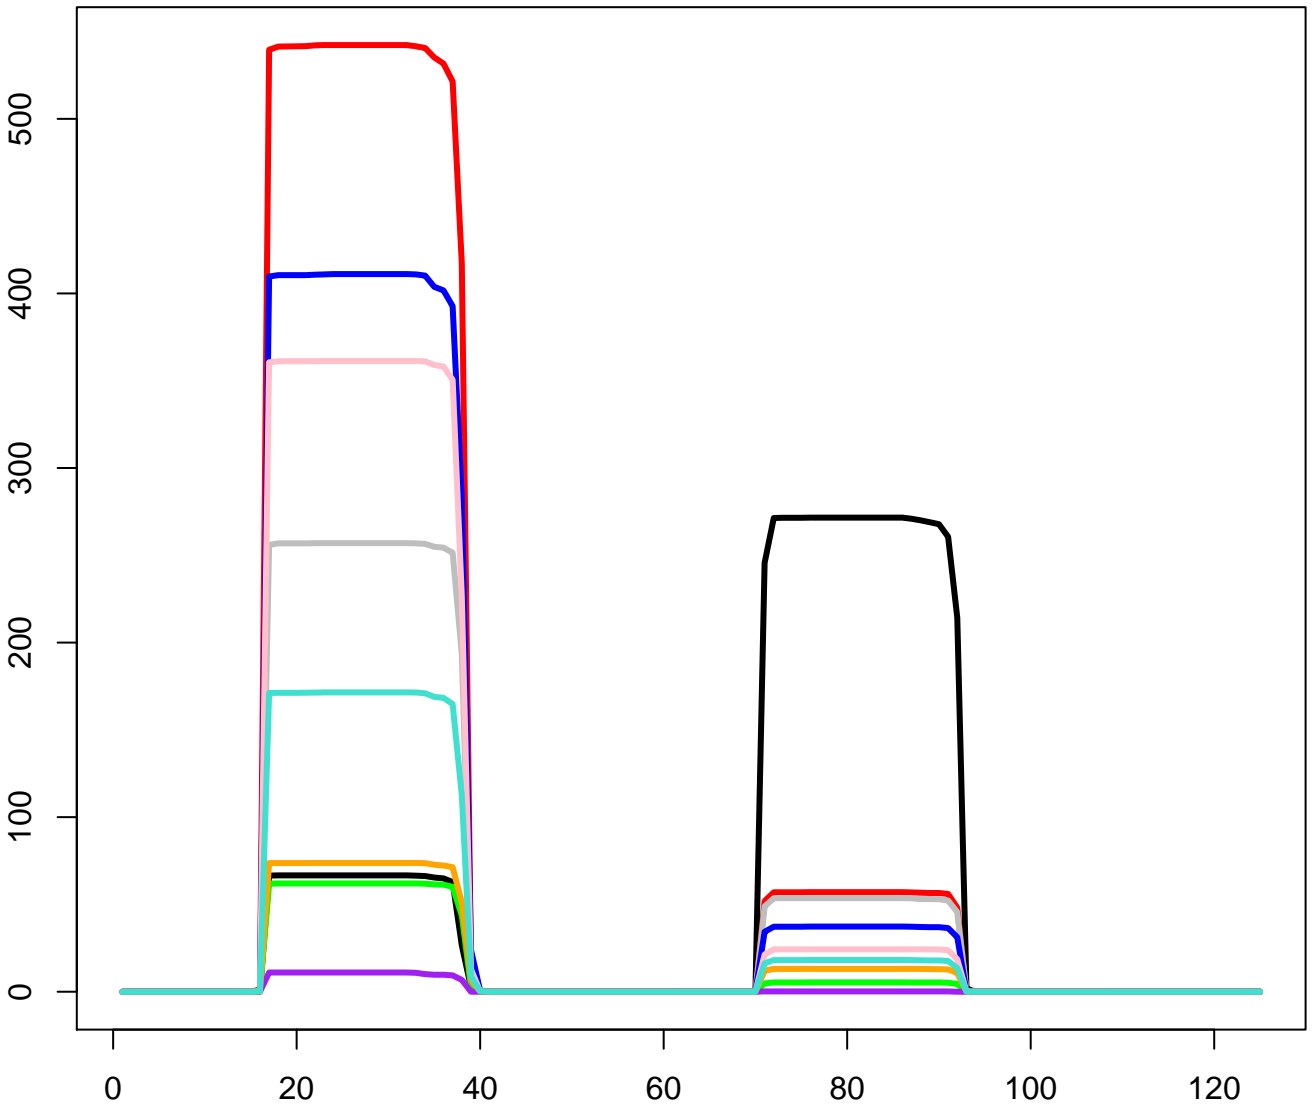

— blood — brain — heart — kidney — lung — ovary — skin — muscle — testis



# 1\_97904313-97904387(-)\_let-7a\_high

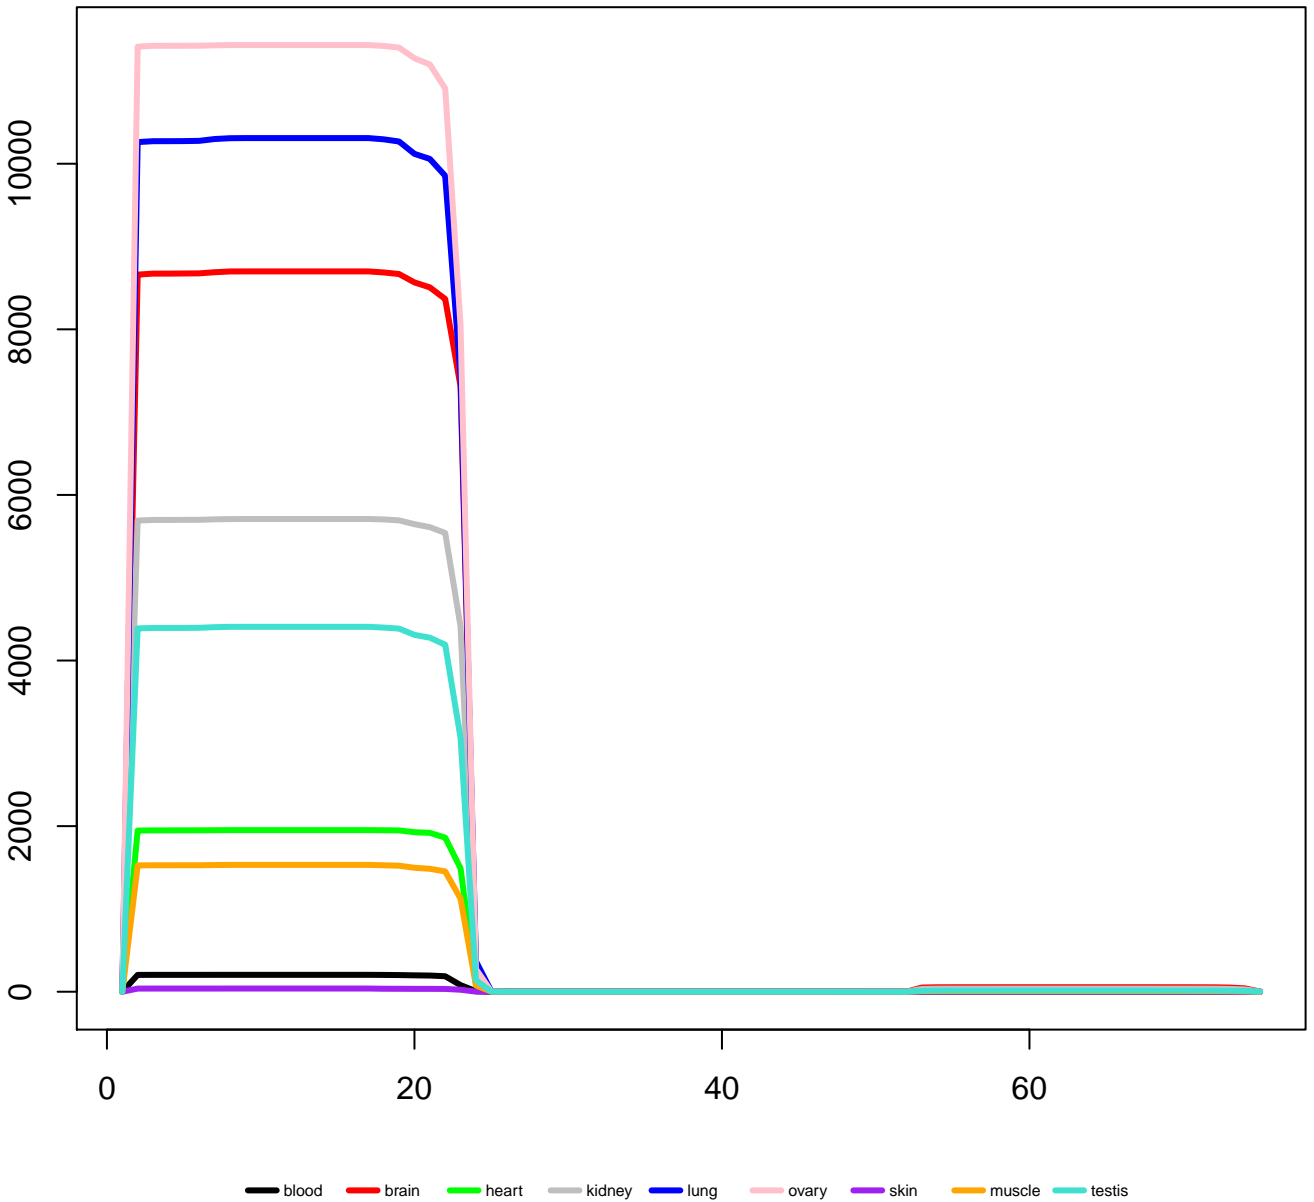

# 1\_98603965-98604081(+)\_cfa-mir-8893\_low

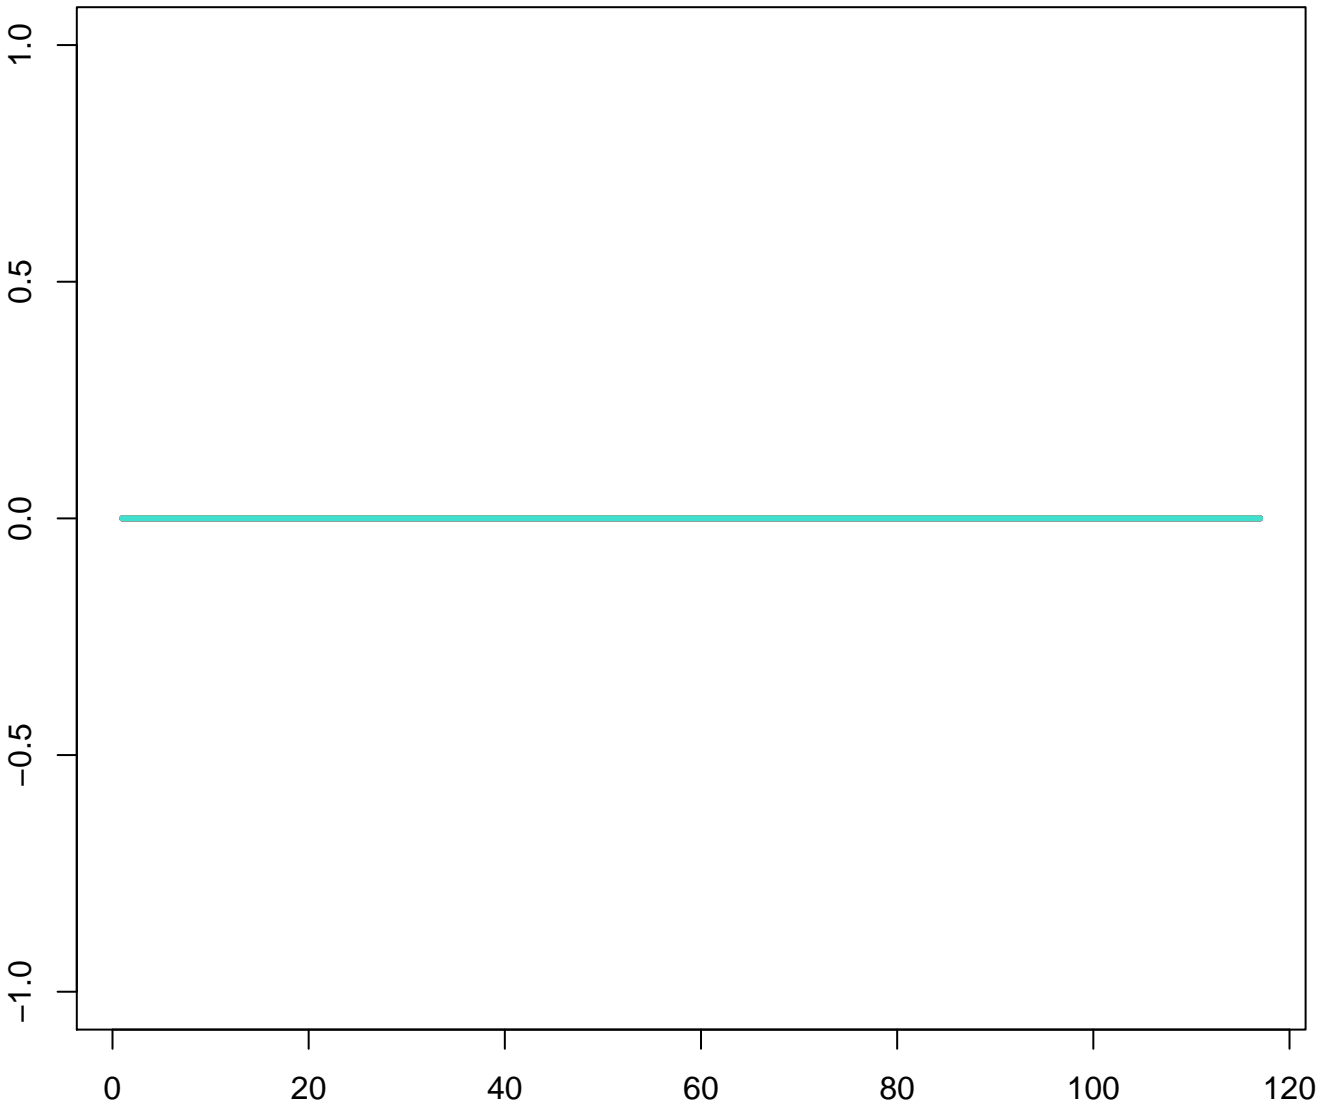

blood brain heart kidney lung ovary skin muscle testis

# 1\_103250644-103250706(-)\_mir-935\_high

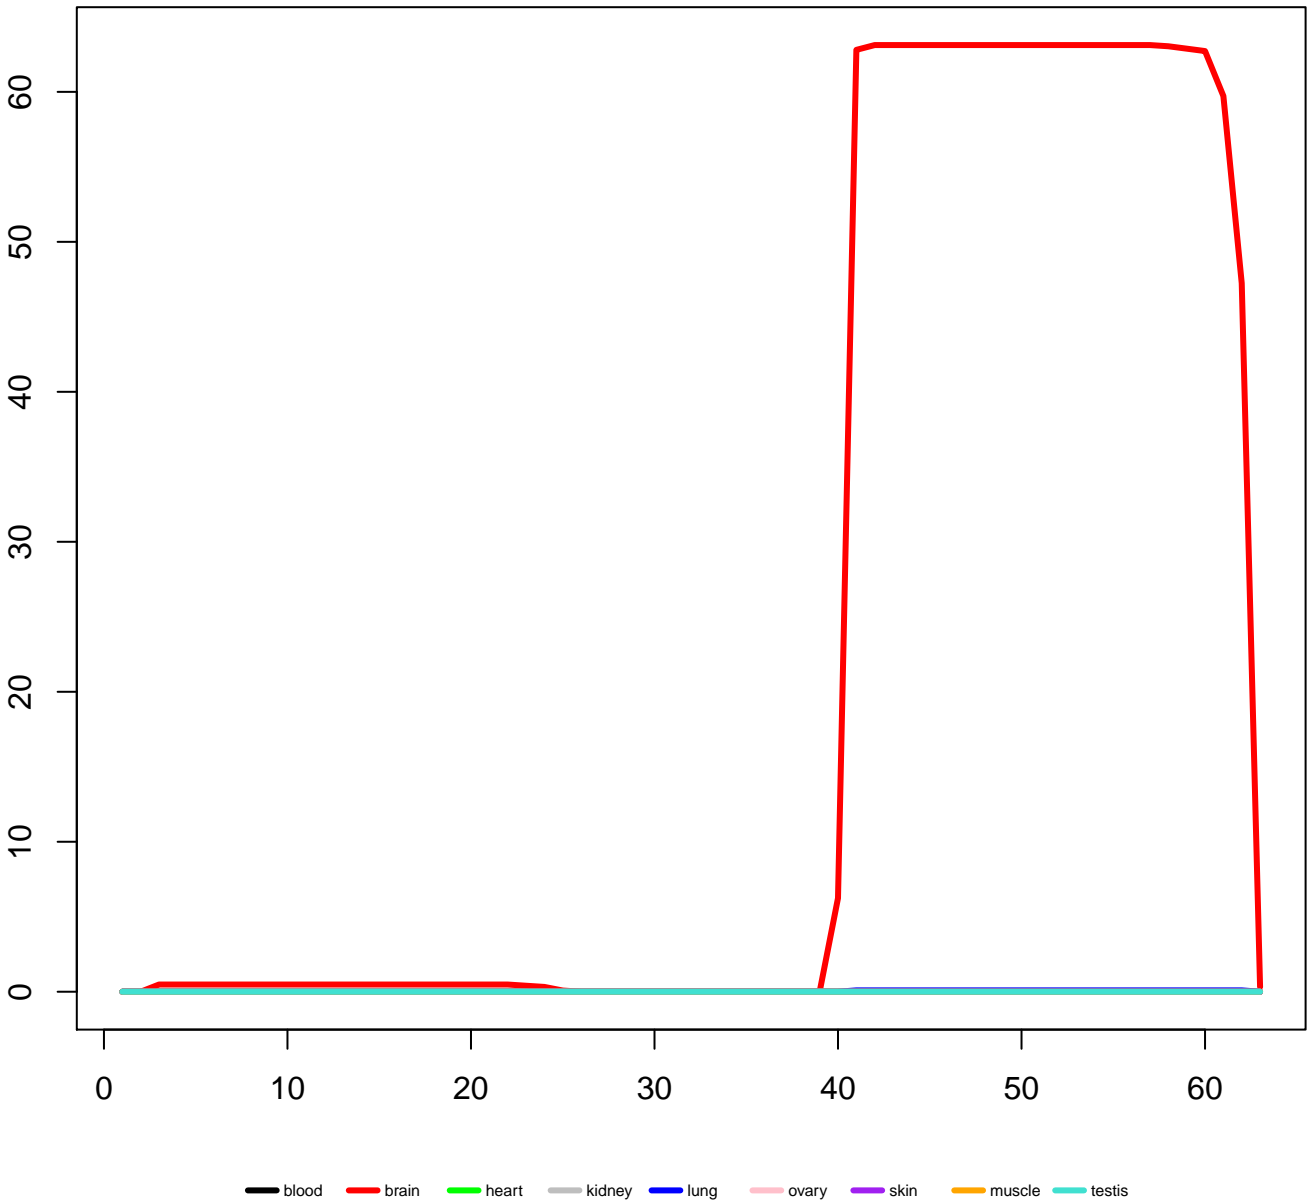



# 1\_103406612-103406686(-)\_mir-371\_high

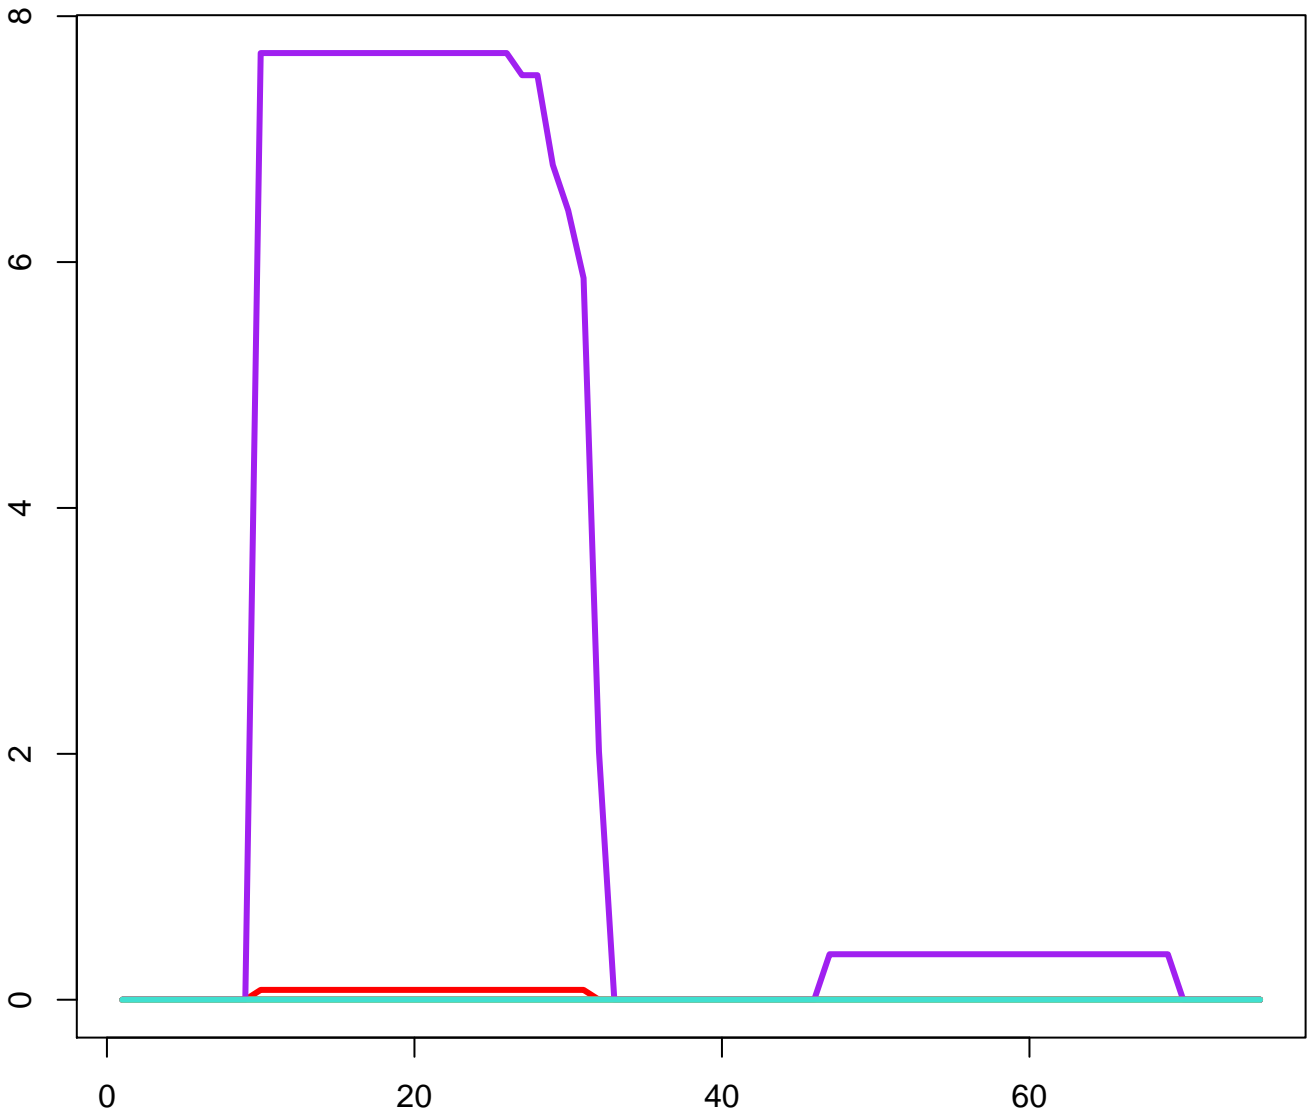

— blood — brain — heart — kidney — lung — ovary — skin — muscle — testis

# 1\_103406620-103406679(+)\_cfa-mir-371\_high

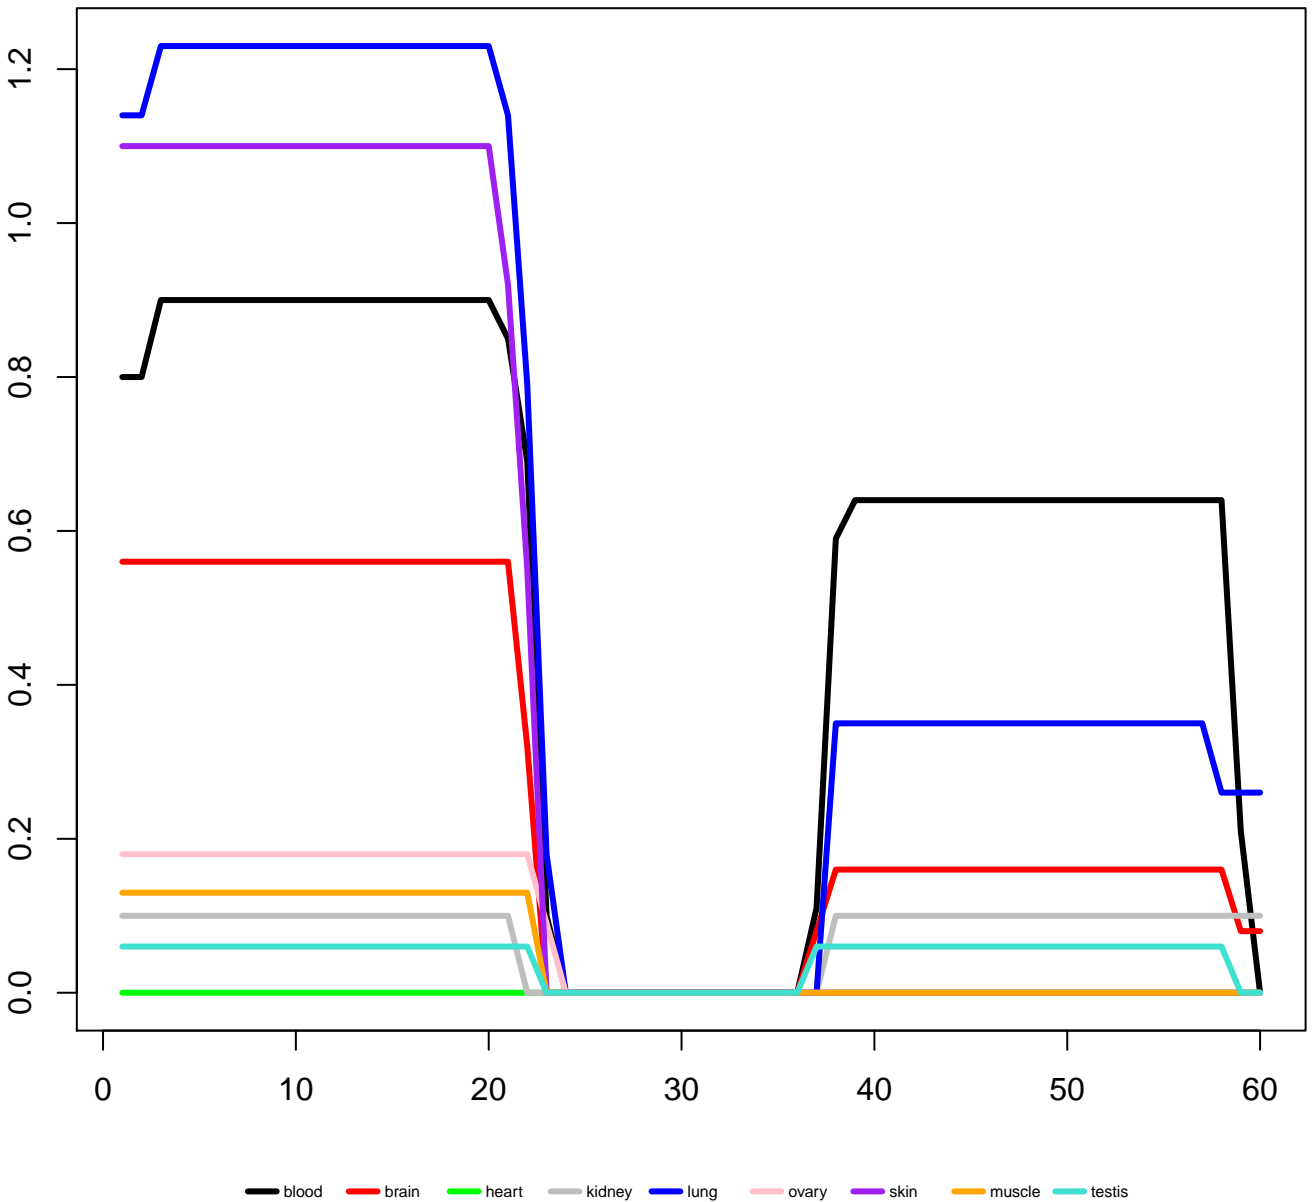

# 1\_103606515-103606589(-)\_mir-371\_high

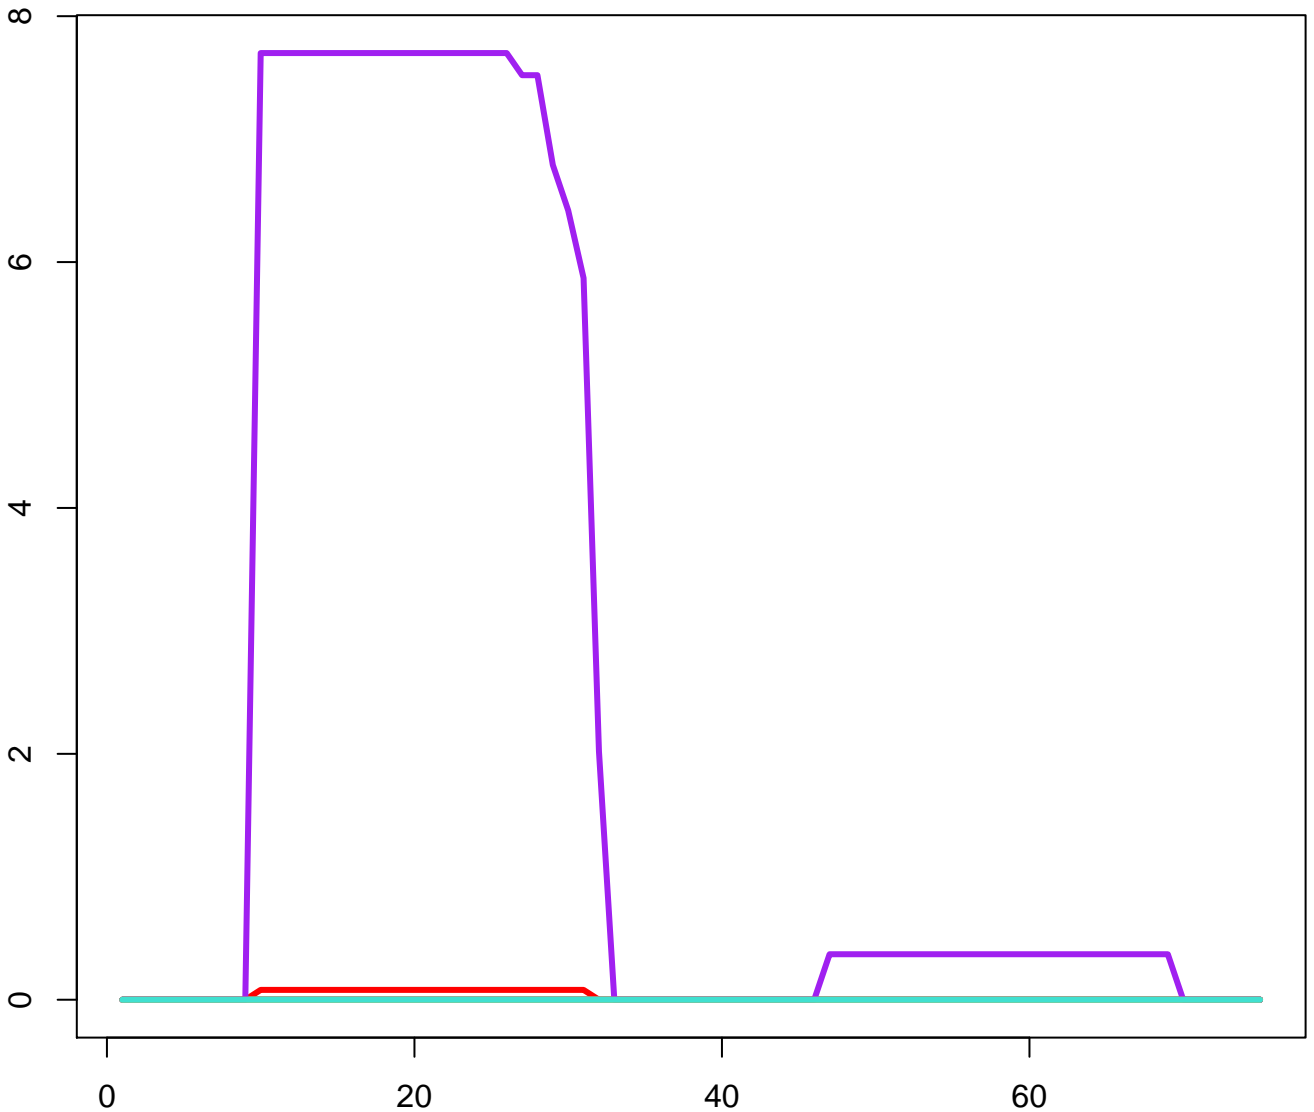

— blood — brain — heart — kidney — lung — ovary — skin — muscle — testis

# 1\_103606523-103606582(+)\_cfa-mir-371\_high

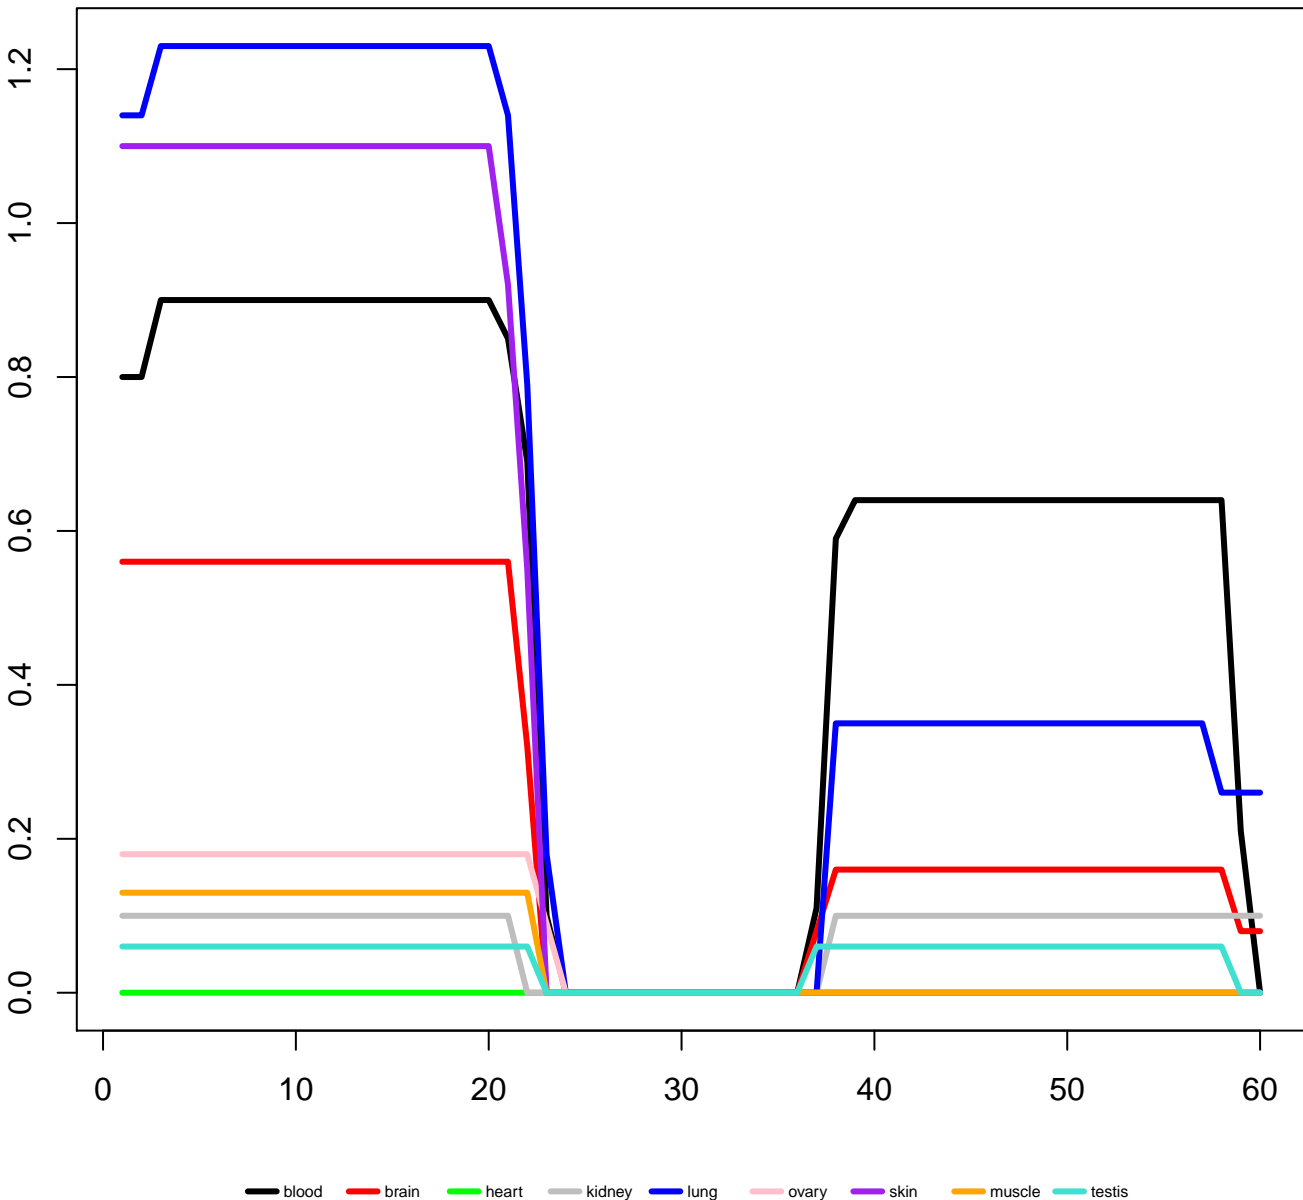

# 1\_104785535-104785677(+)\_cfa-mir-8891\_low

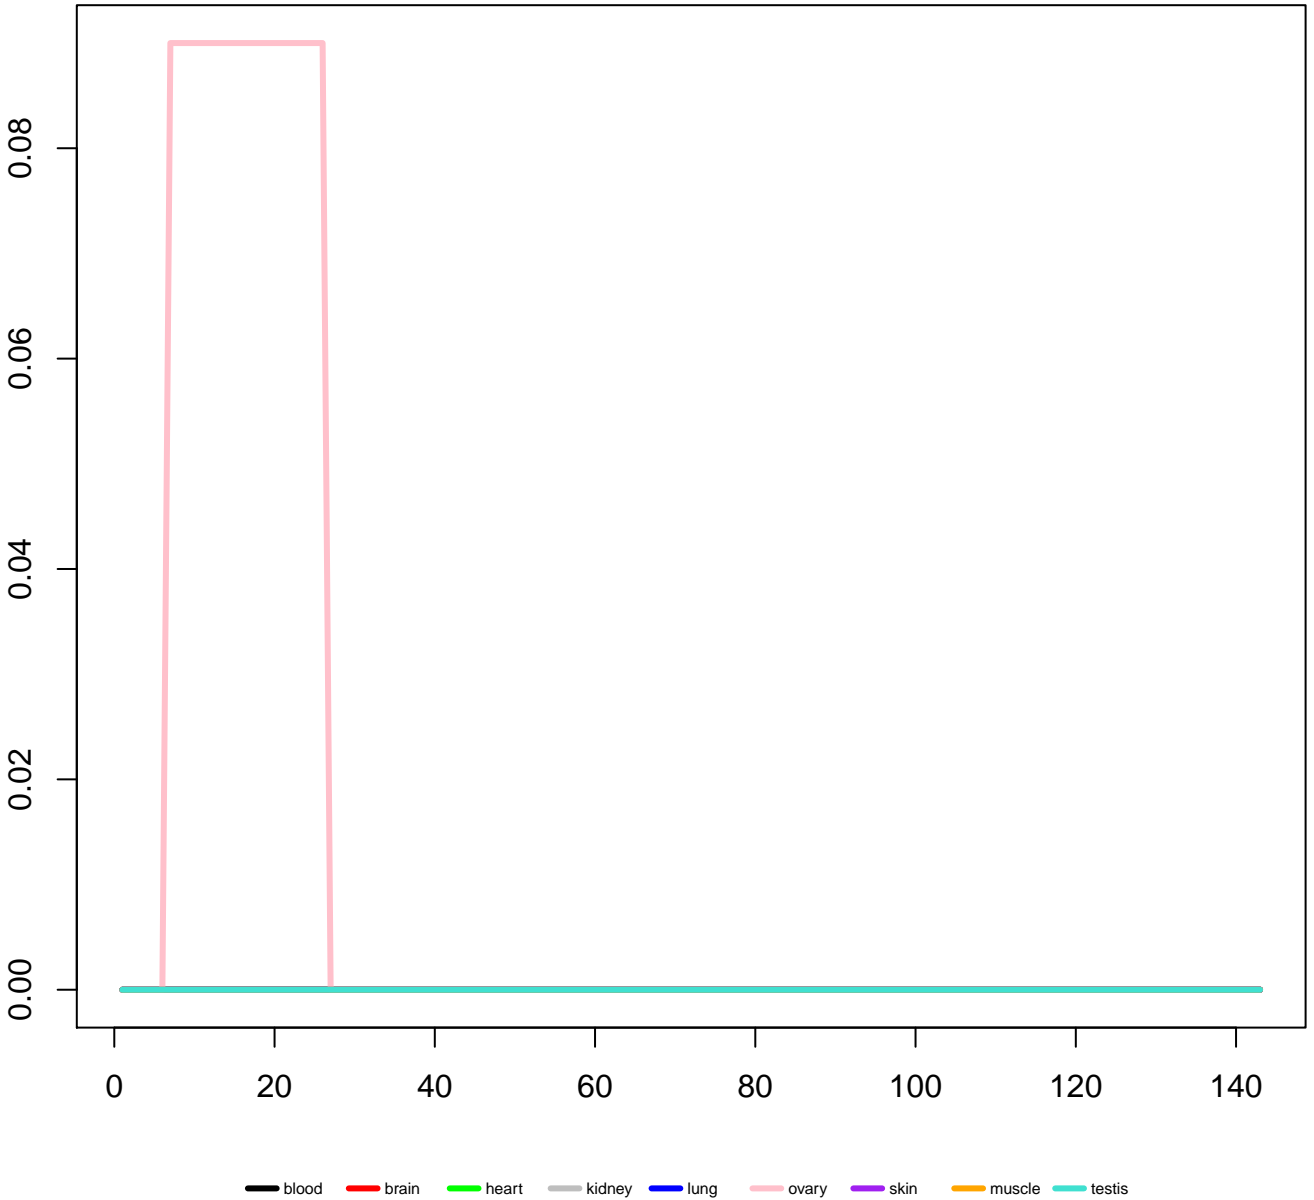

# 1\_105400273-105400332(-)\_cfa-mir-125a\_high

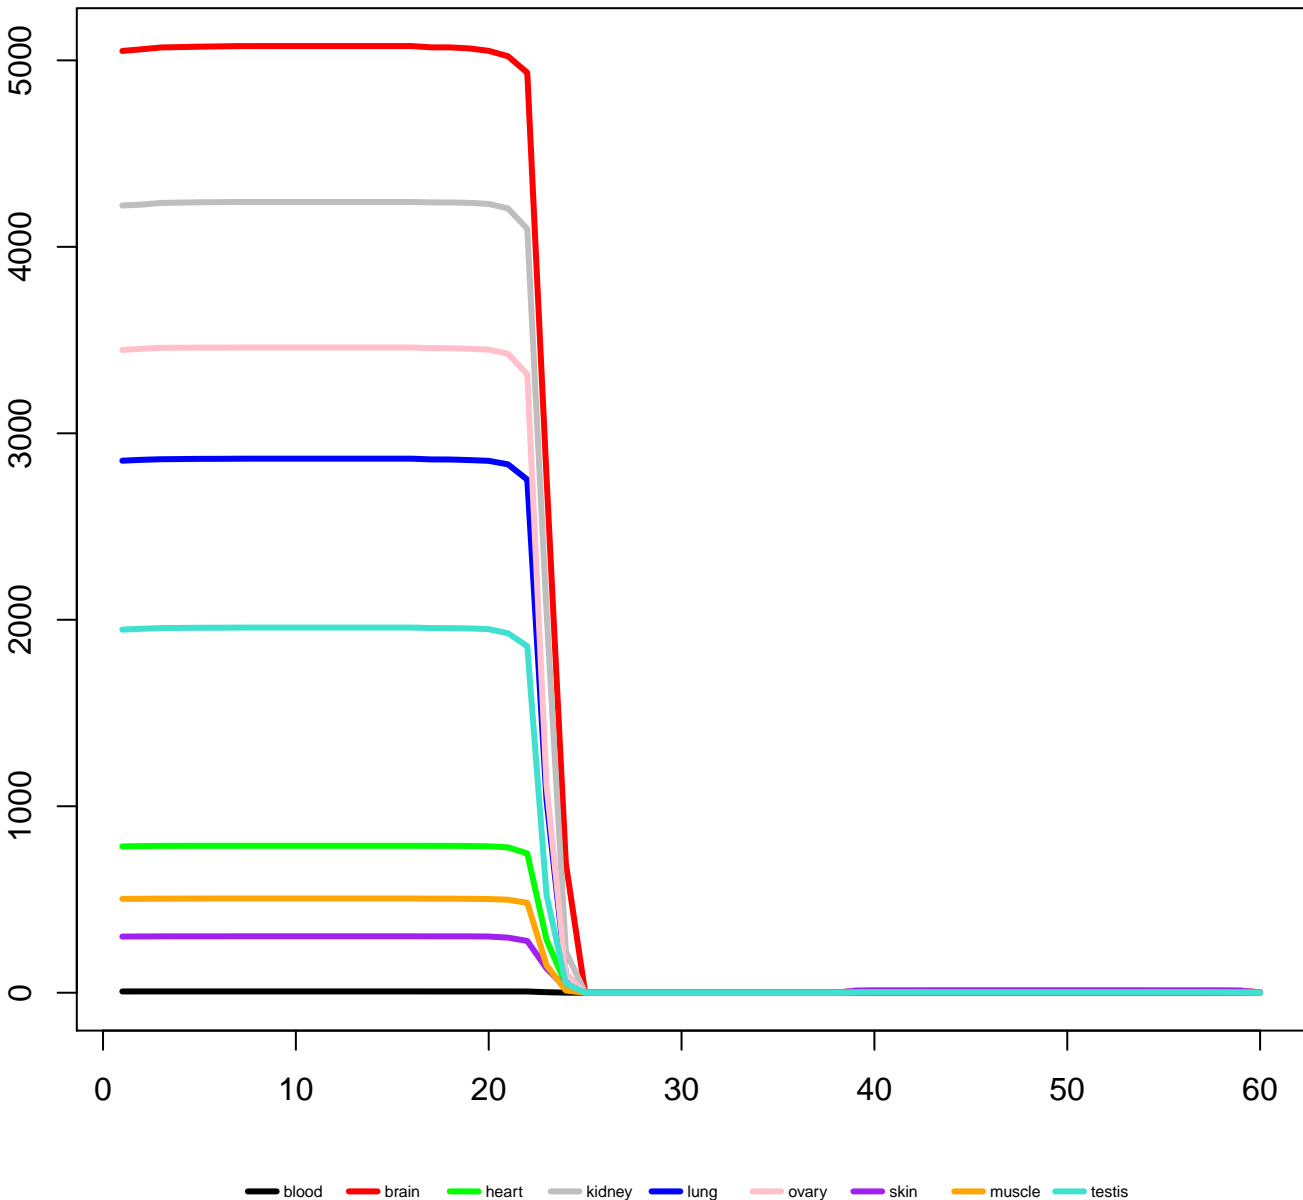

# 1\_105400740-105400806(-)\_cfa-let-7e\_high

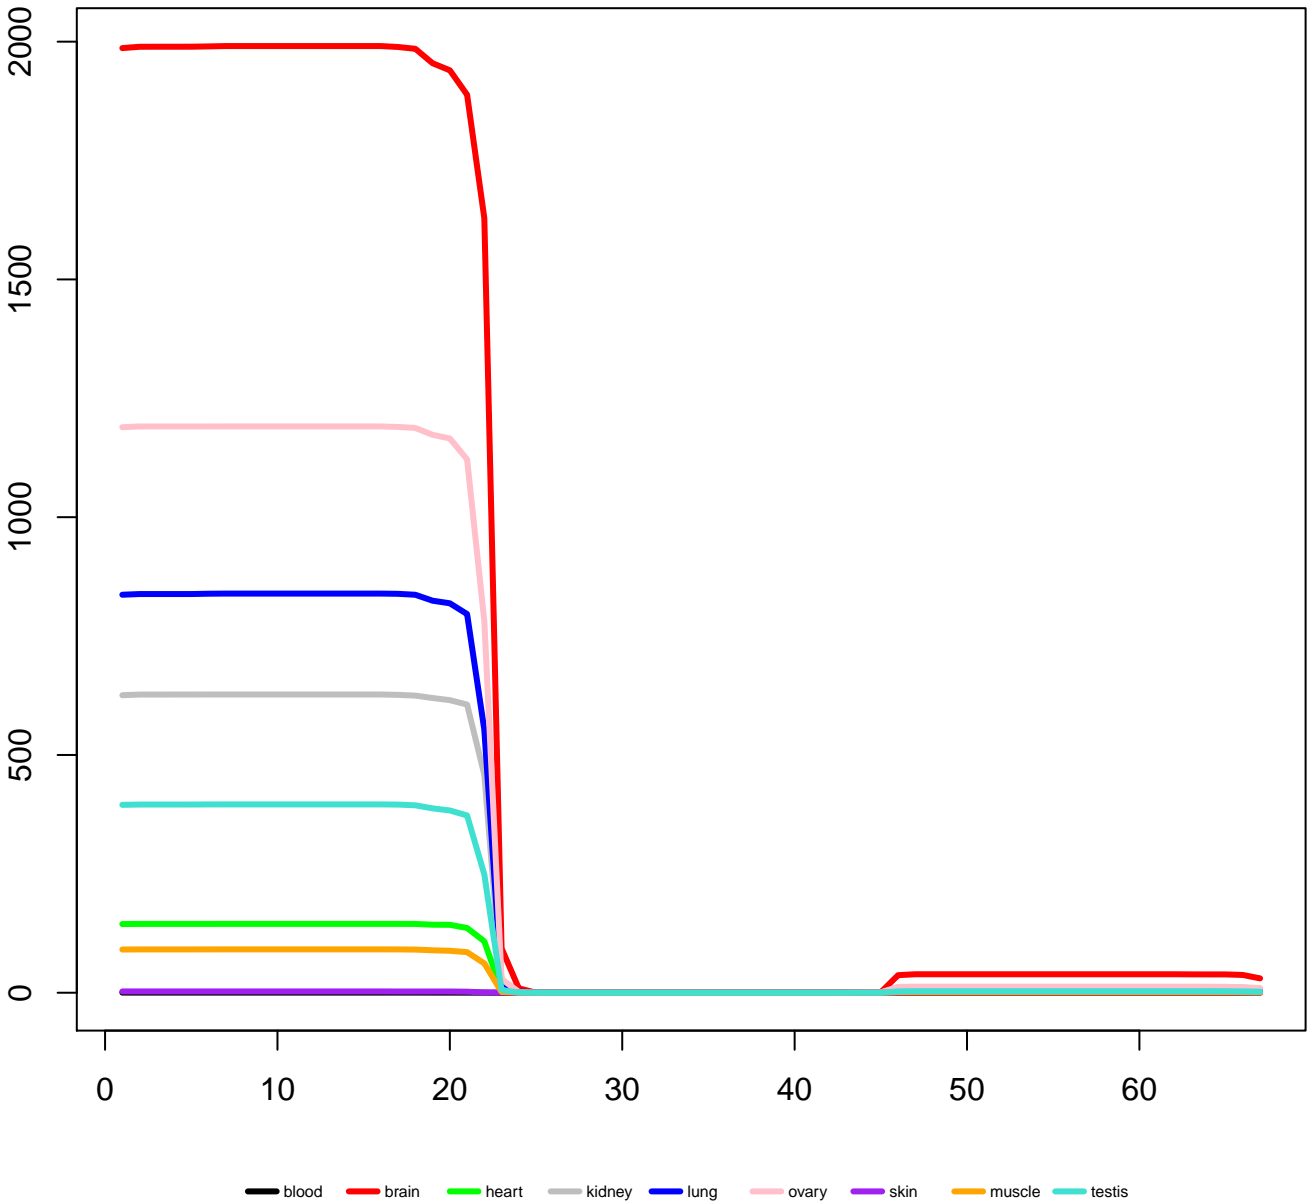

# 1\_105400925-105400984(-)\_cfa-mir-99b\_high

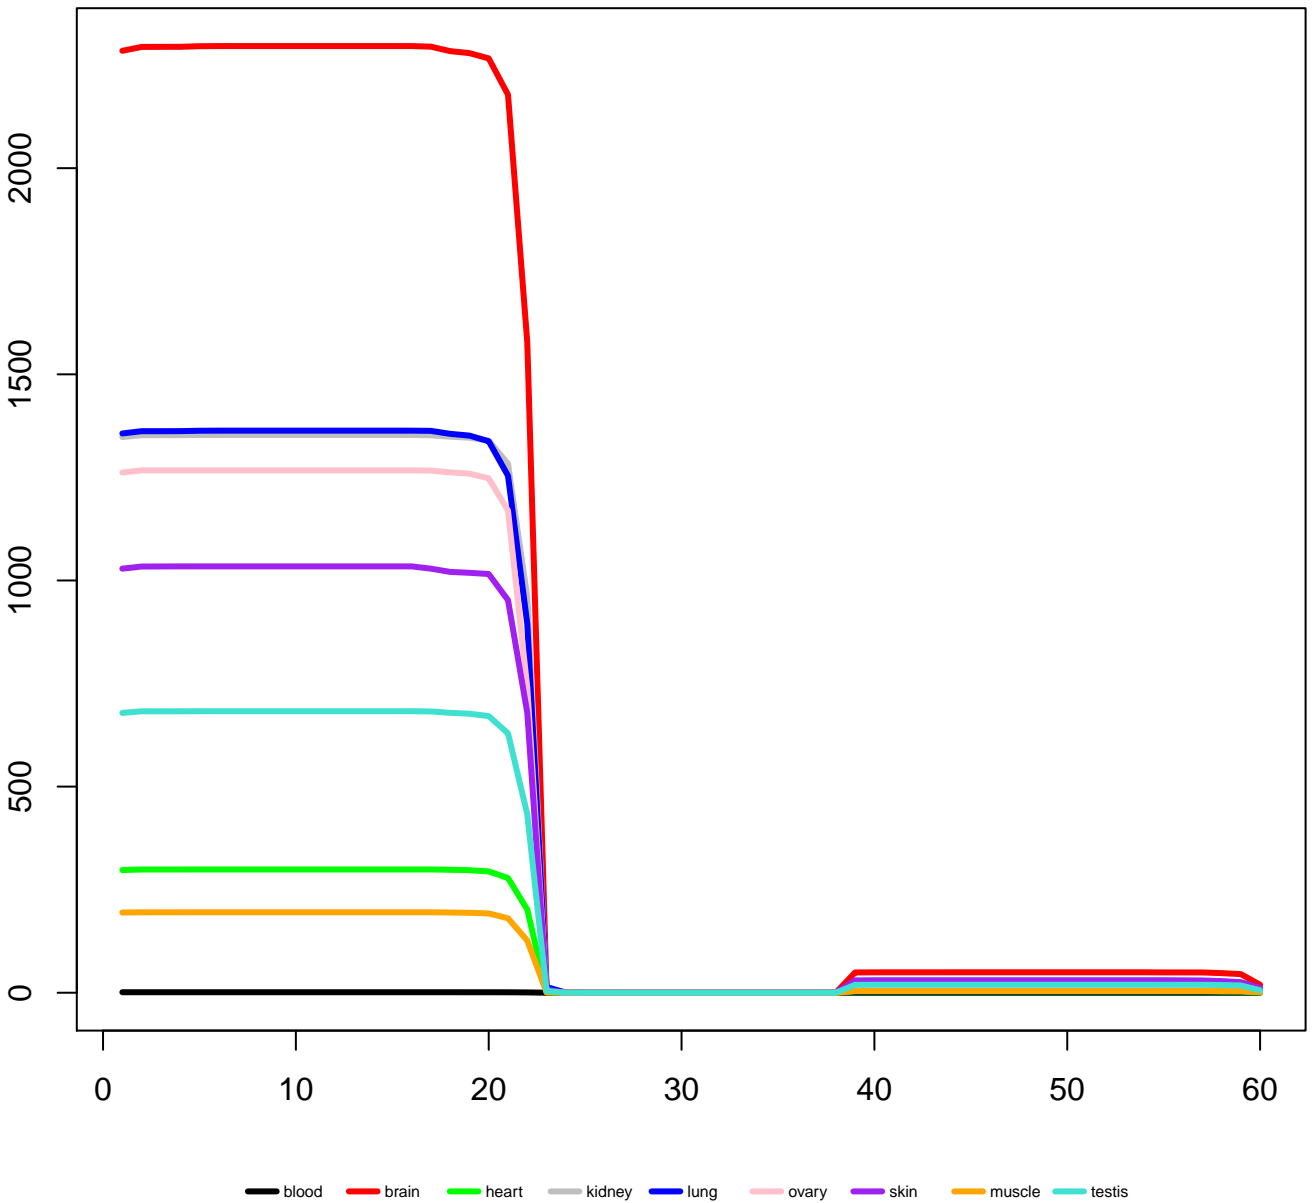



# 1\_106998756-106998812(+)\_cfa-mir-150\_high

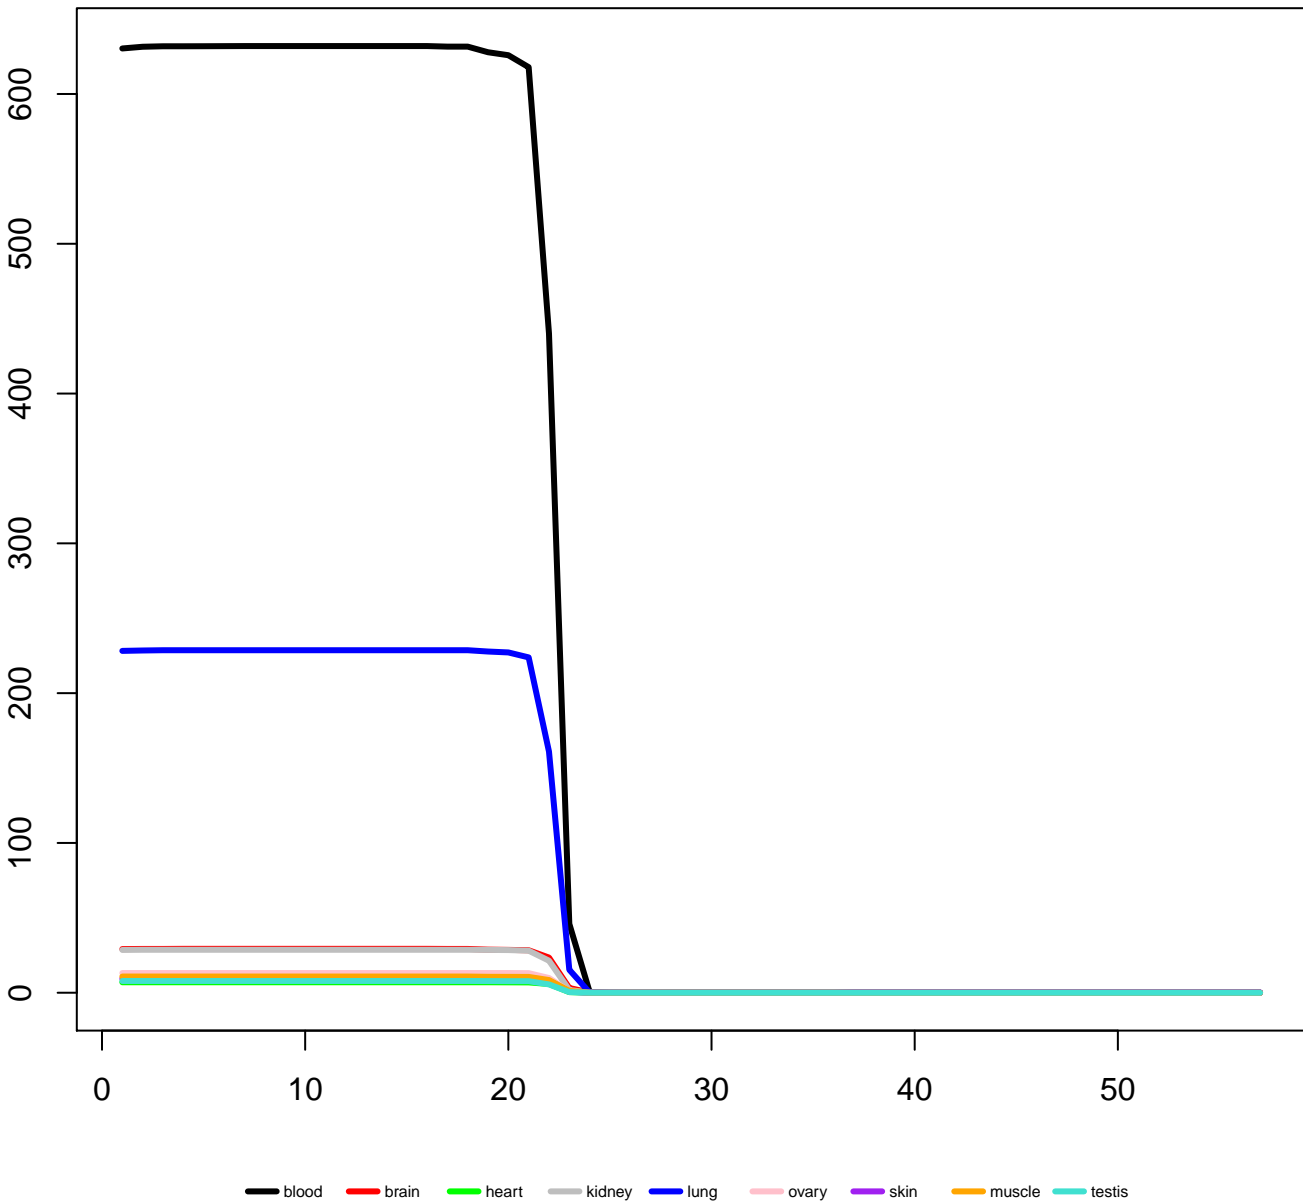

# 1\_107121560-107121694(+)\_cfa-mir-8890\_low

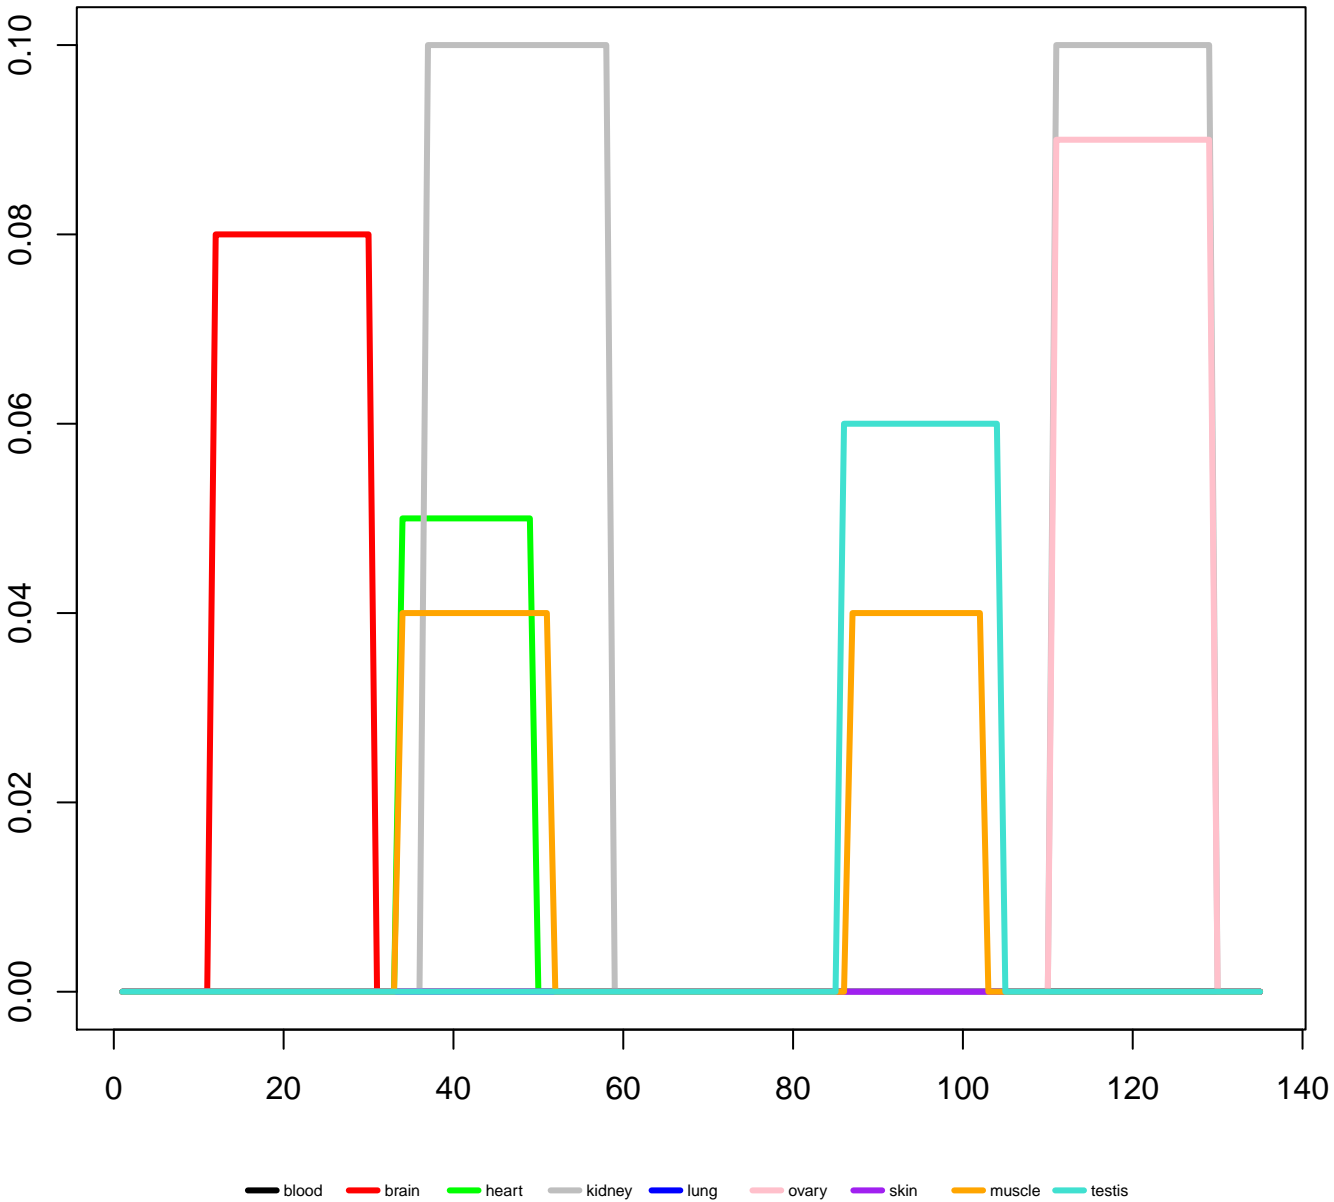

# 1\_109618325-109618465(-)\_cfa-mir-769\_high

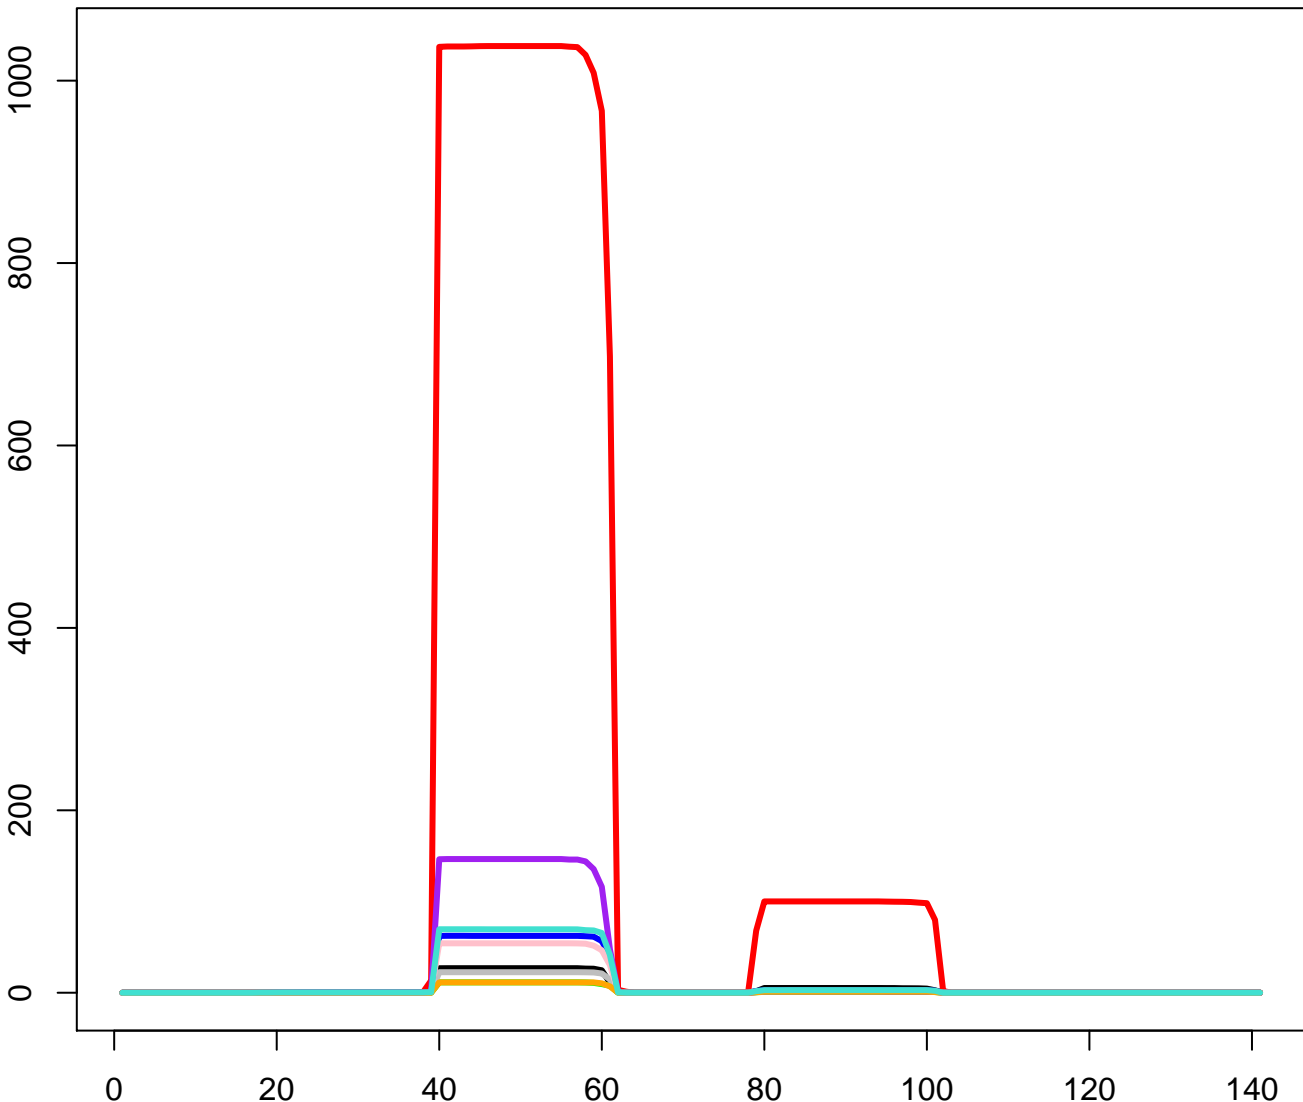

— blood — brain — heart — kidney — lung — ovary — skin — muscle — testis



# 1\_110690638-110690711(+)\_mir-6516\_low

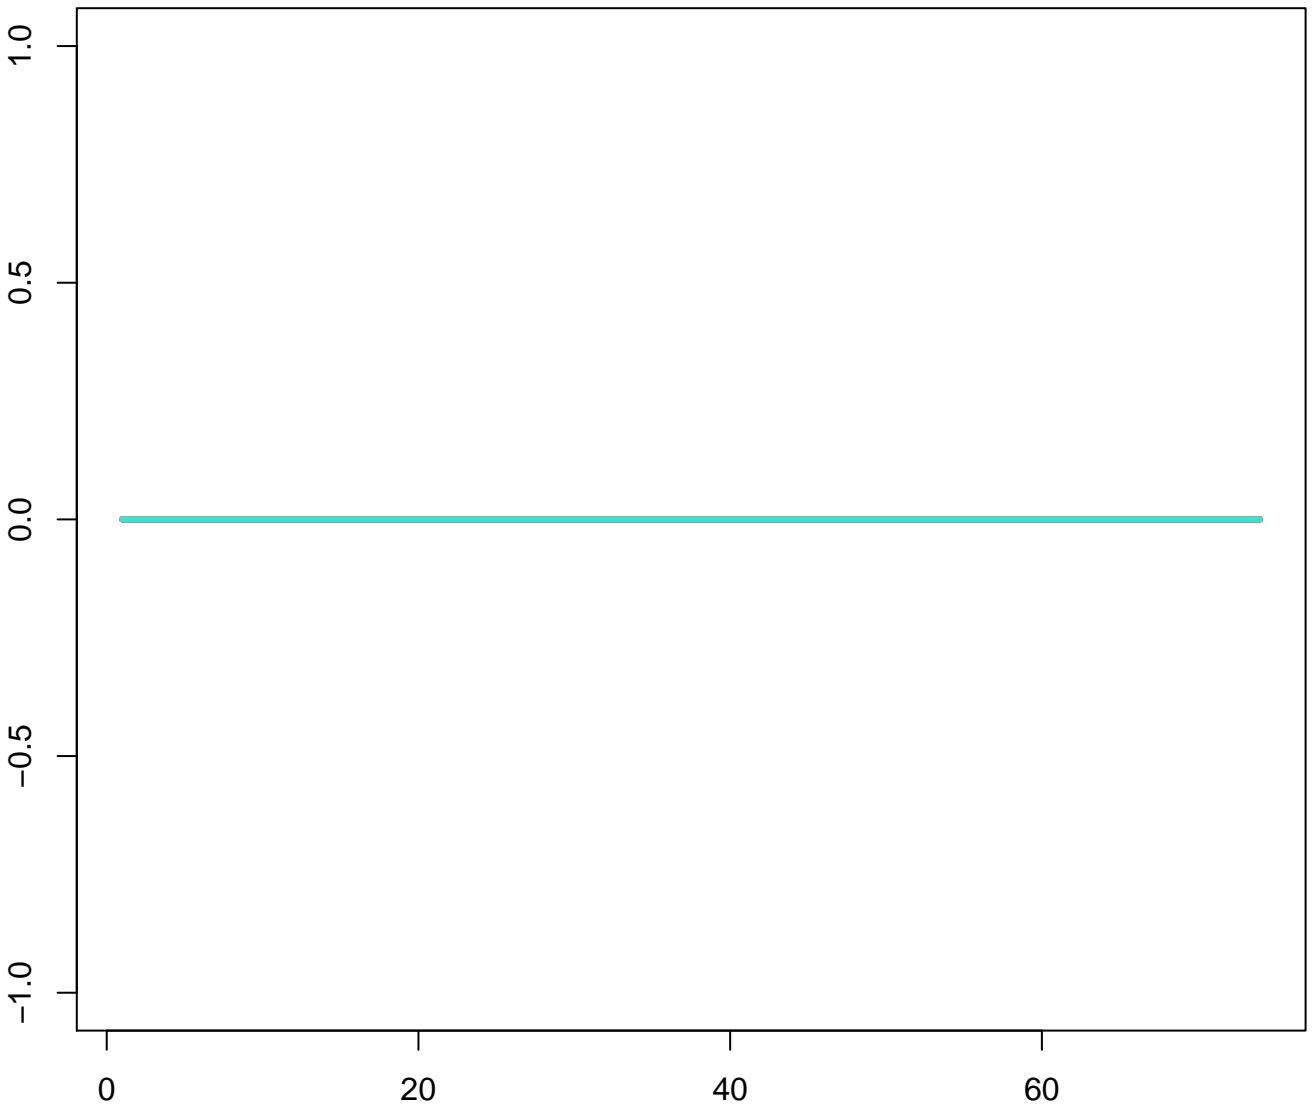

blood brain heart kidney lung ovary skin muscle testis

# 1\_113031313-113031437(+)\_cfa-mir-8892\_low

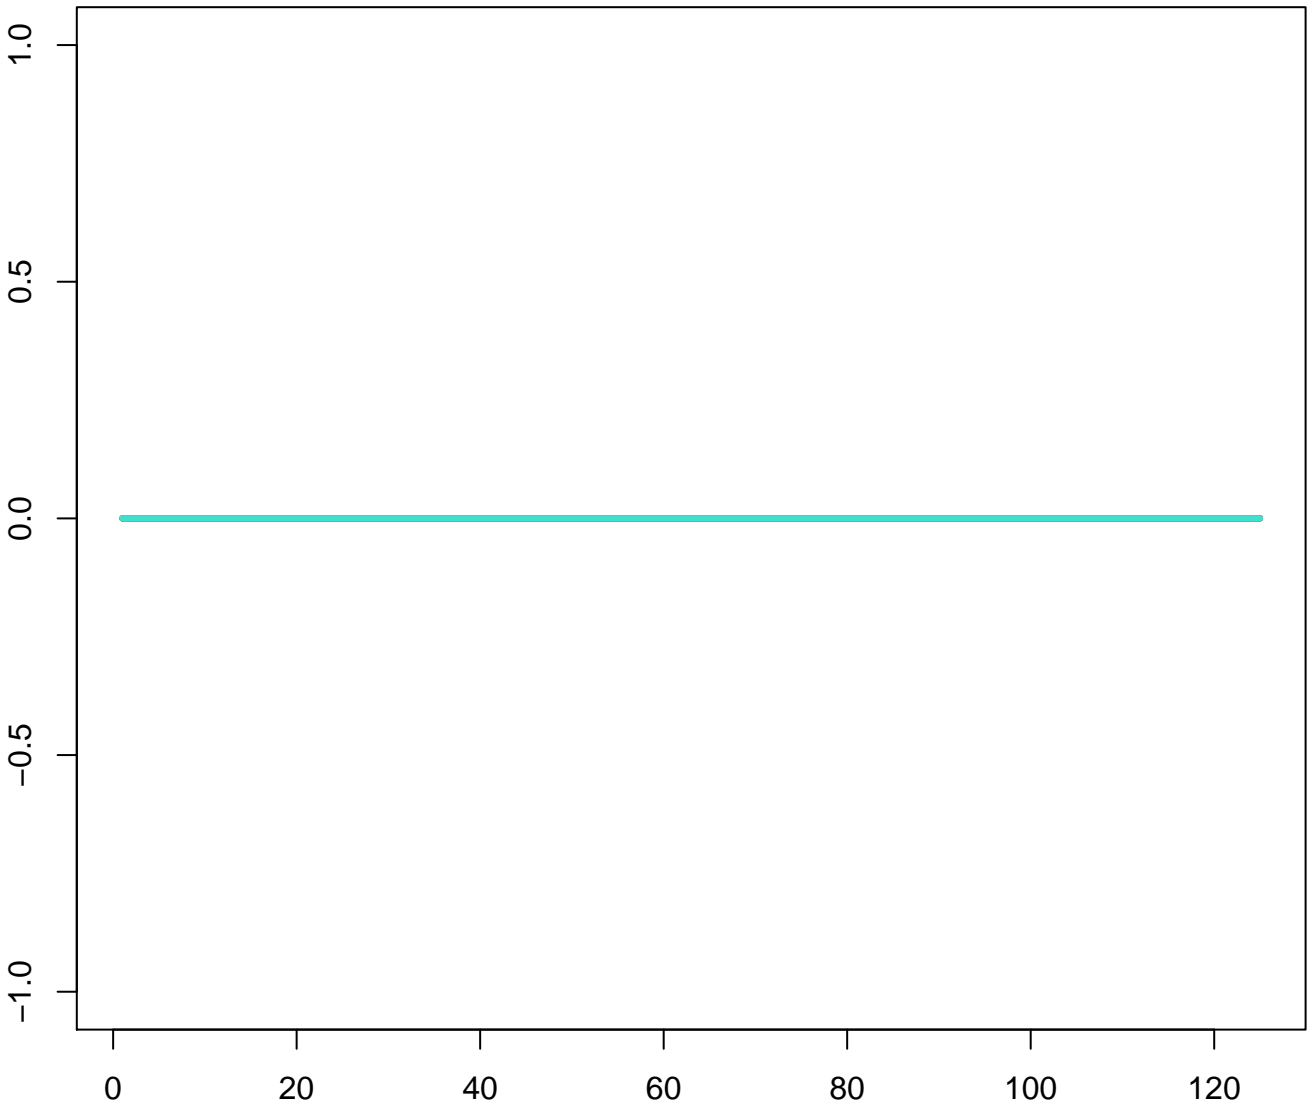

— blood — brain — heart — kidney — lung — ovary — skin — muscle — testis

# 1\_114501780-114501849(+)\_mir-9087\_low

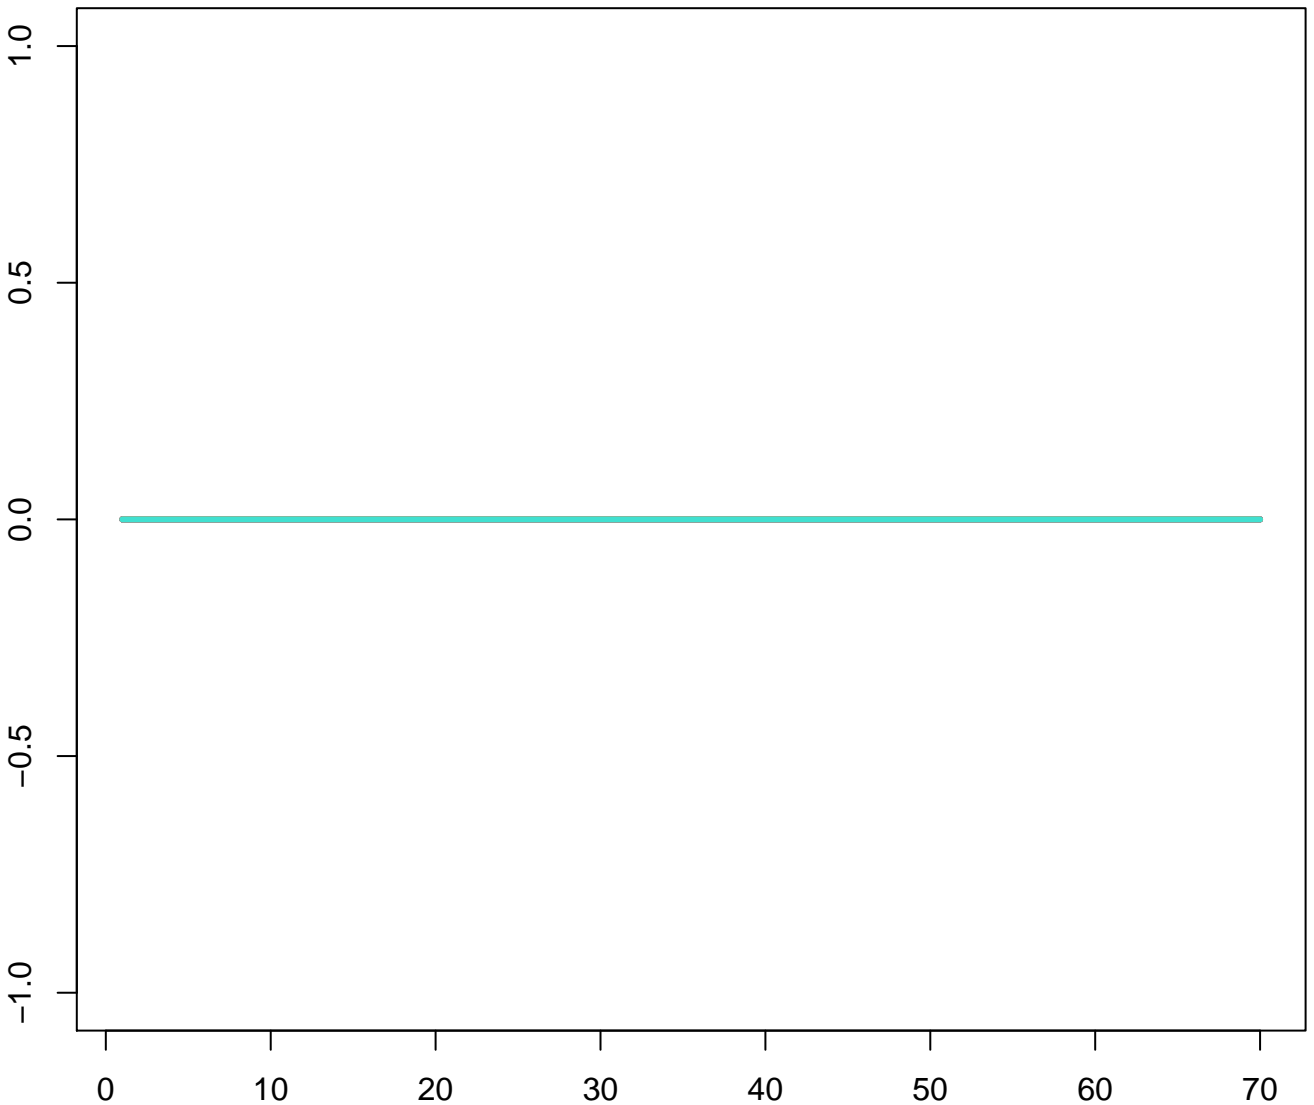

blood brain heart kidney lung ovary skin muscle testis

# 1\_121781461-121781543(-)\_mir-2901\_low

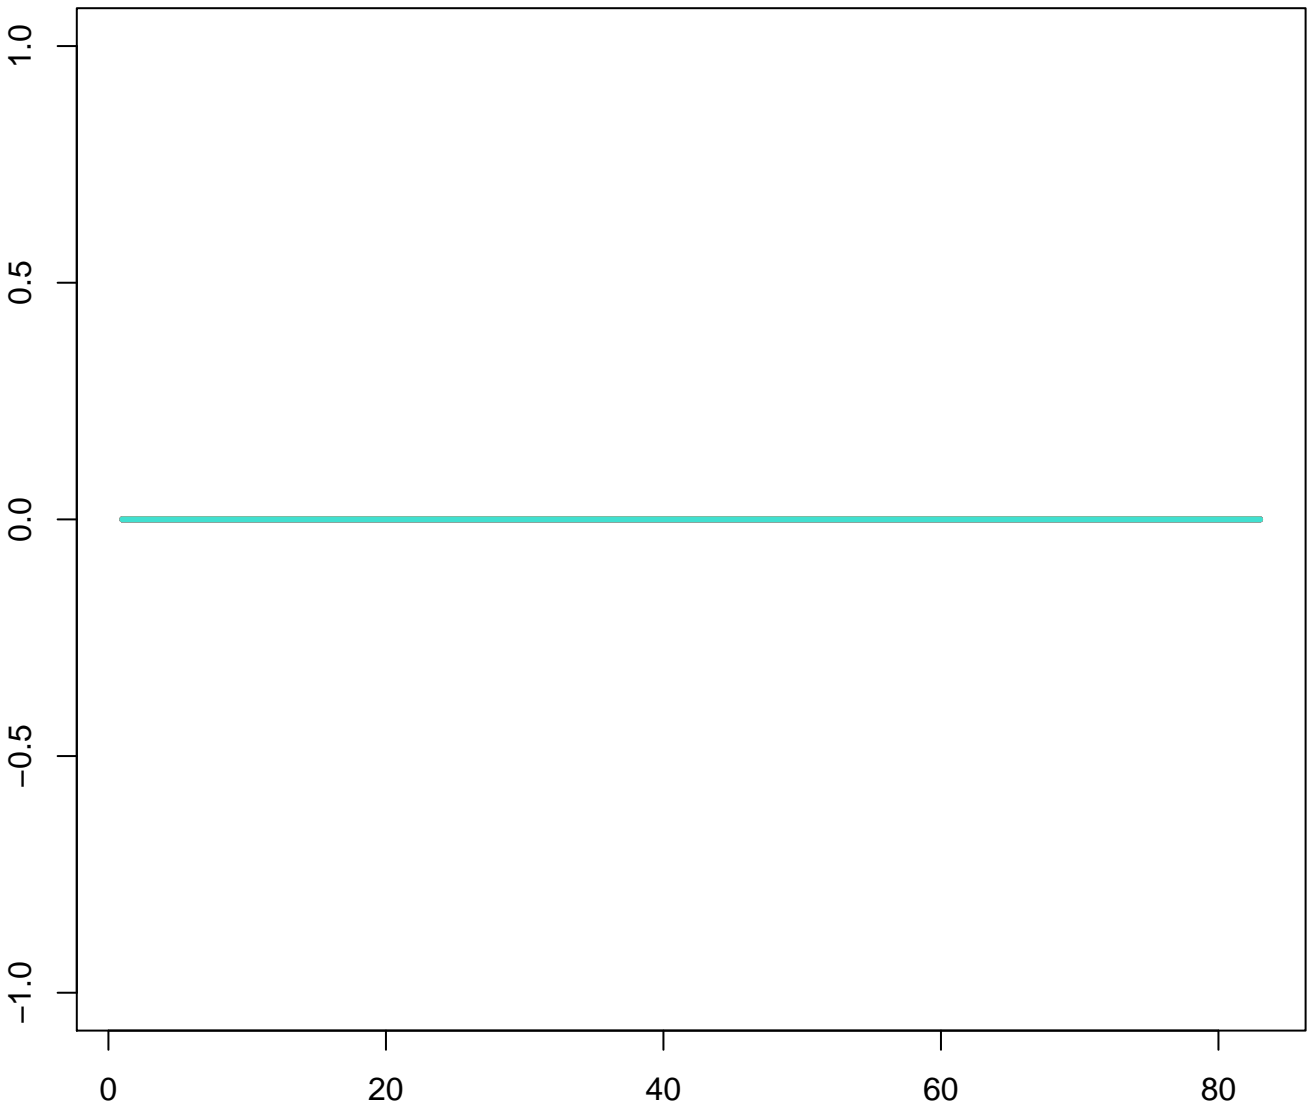

— blood — brain — heart — kidney — lung — ovary — skin — muscle — testis



# 1\_122413078-122413146(+)\_cfa-mir-578\_low

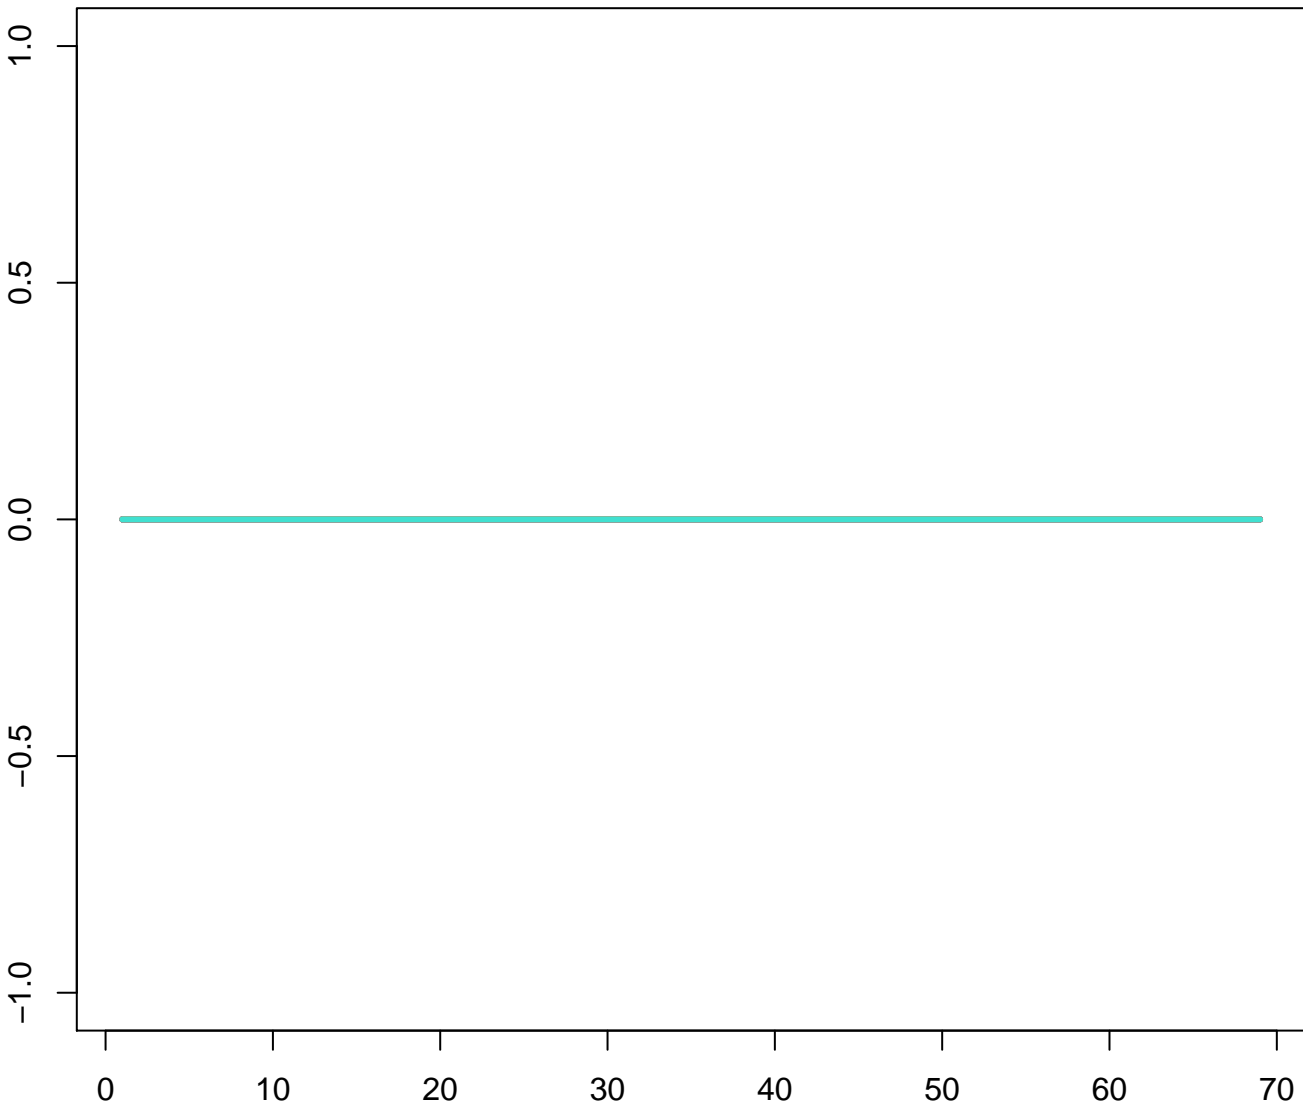

blood brain heart kidney lung ovary skin muscle testis



# 10\_1880513-1880572(-)\_cfa-mir-26a-2\_high

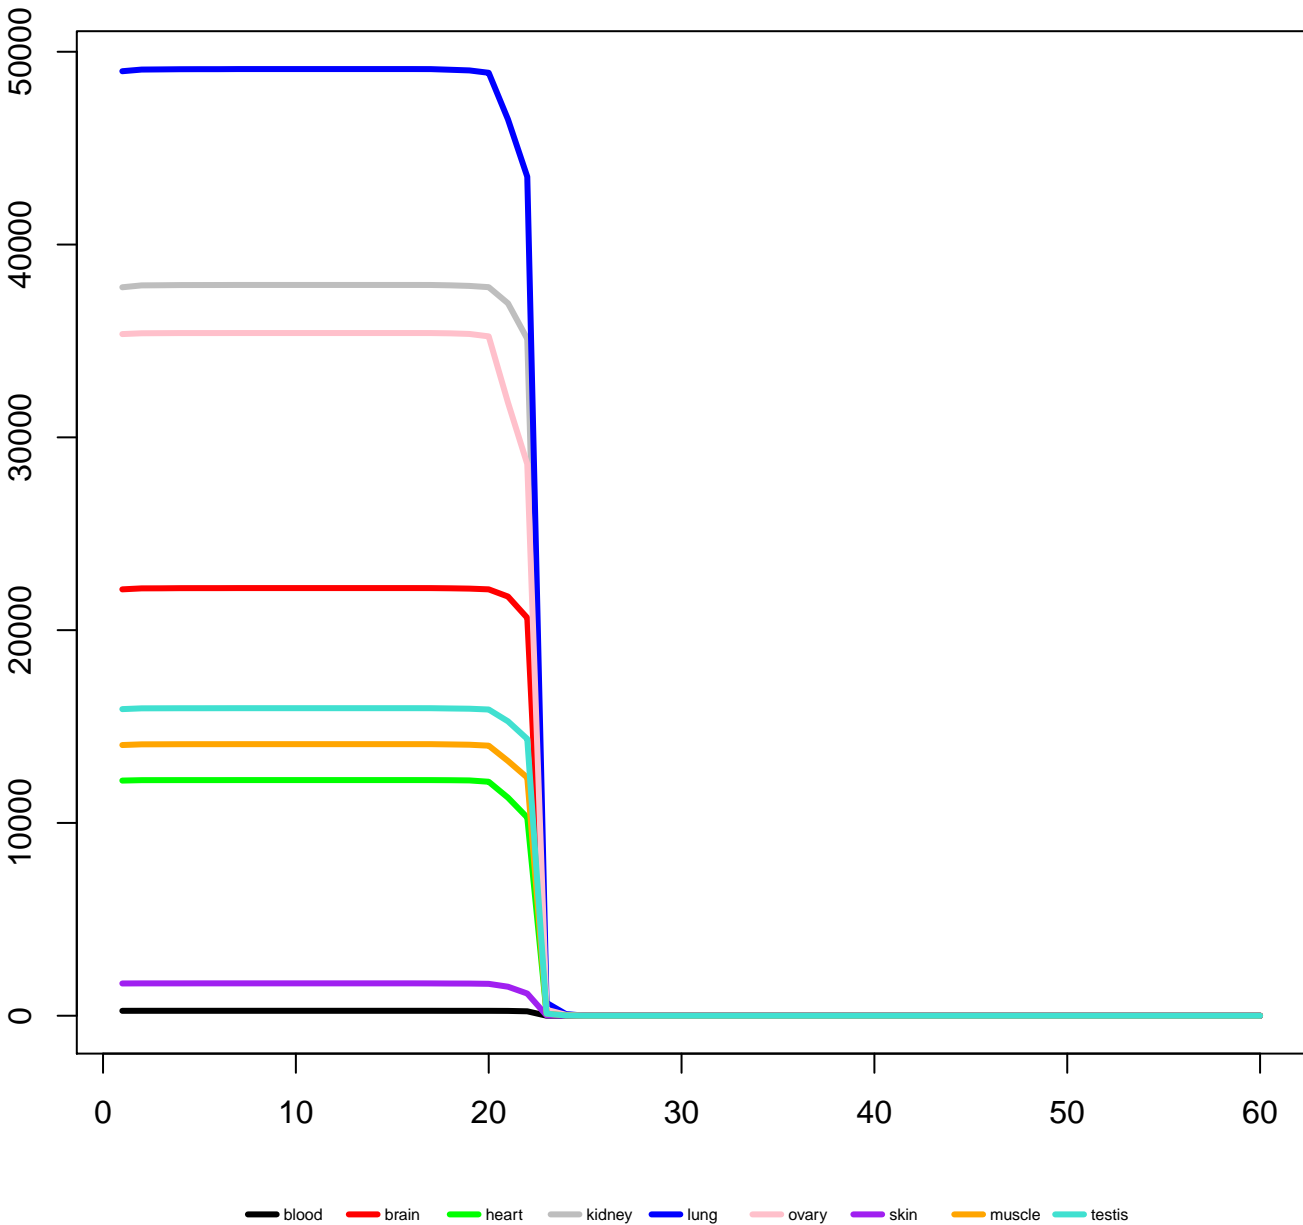

# 10\_6071841-6071901(-)\_mir-8104\_low

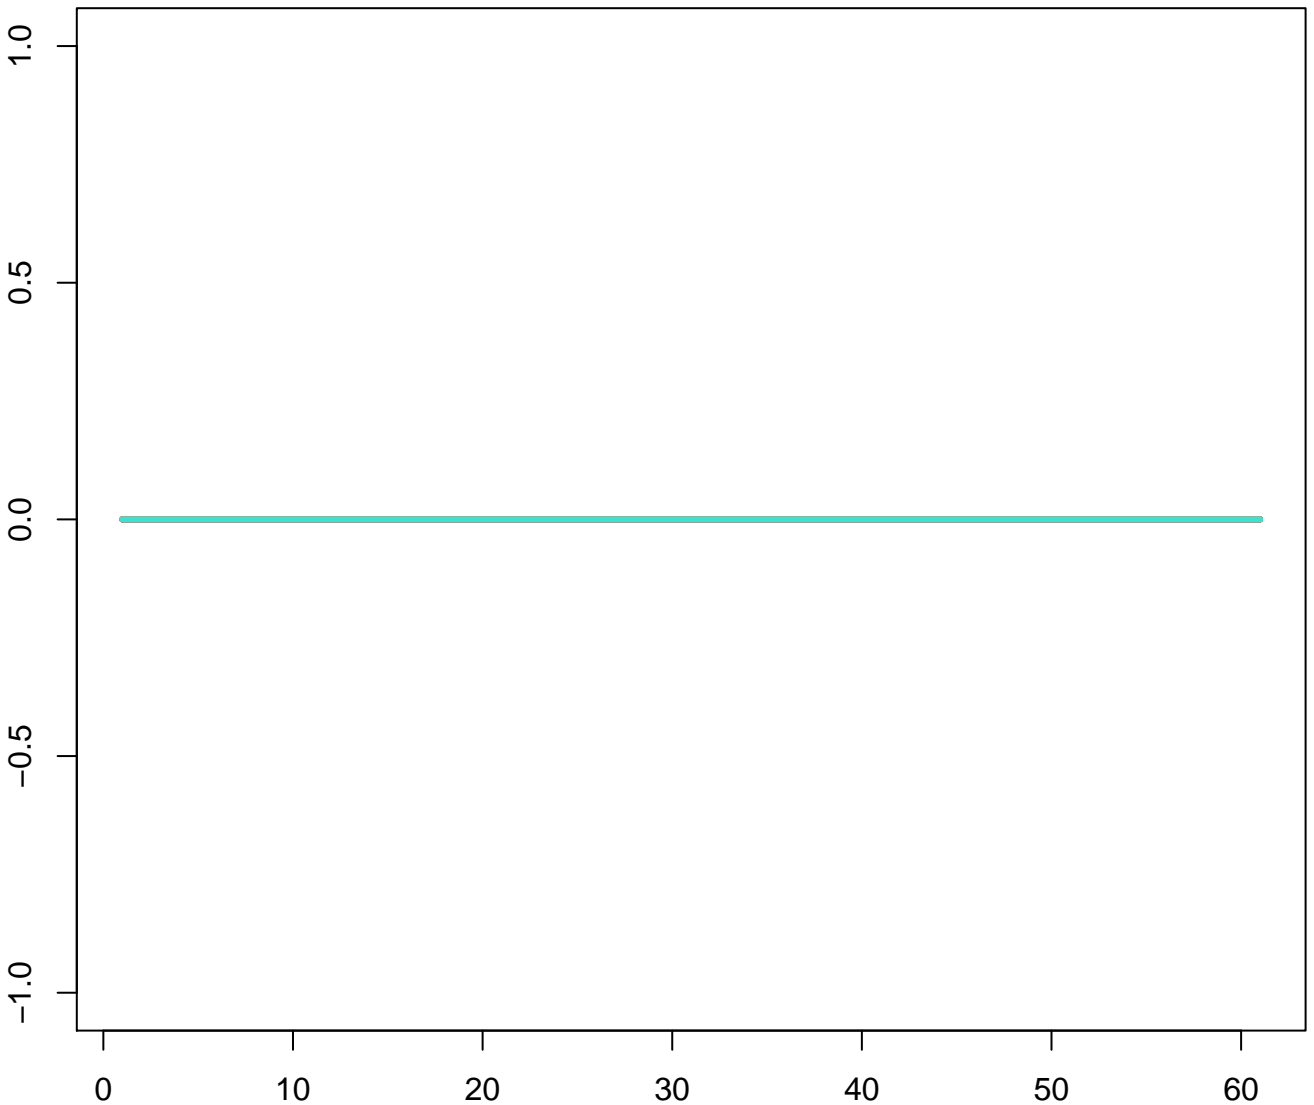

blood brain heart kidney lung ovary skin muscle testis

# 10\_8382355-8382474(+)\_mir-763\_low

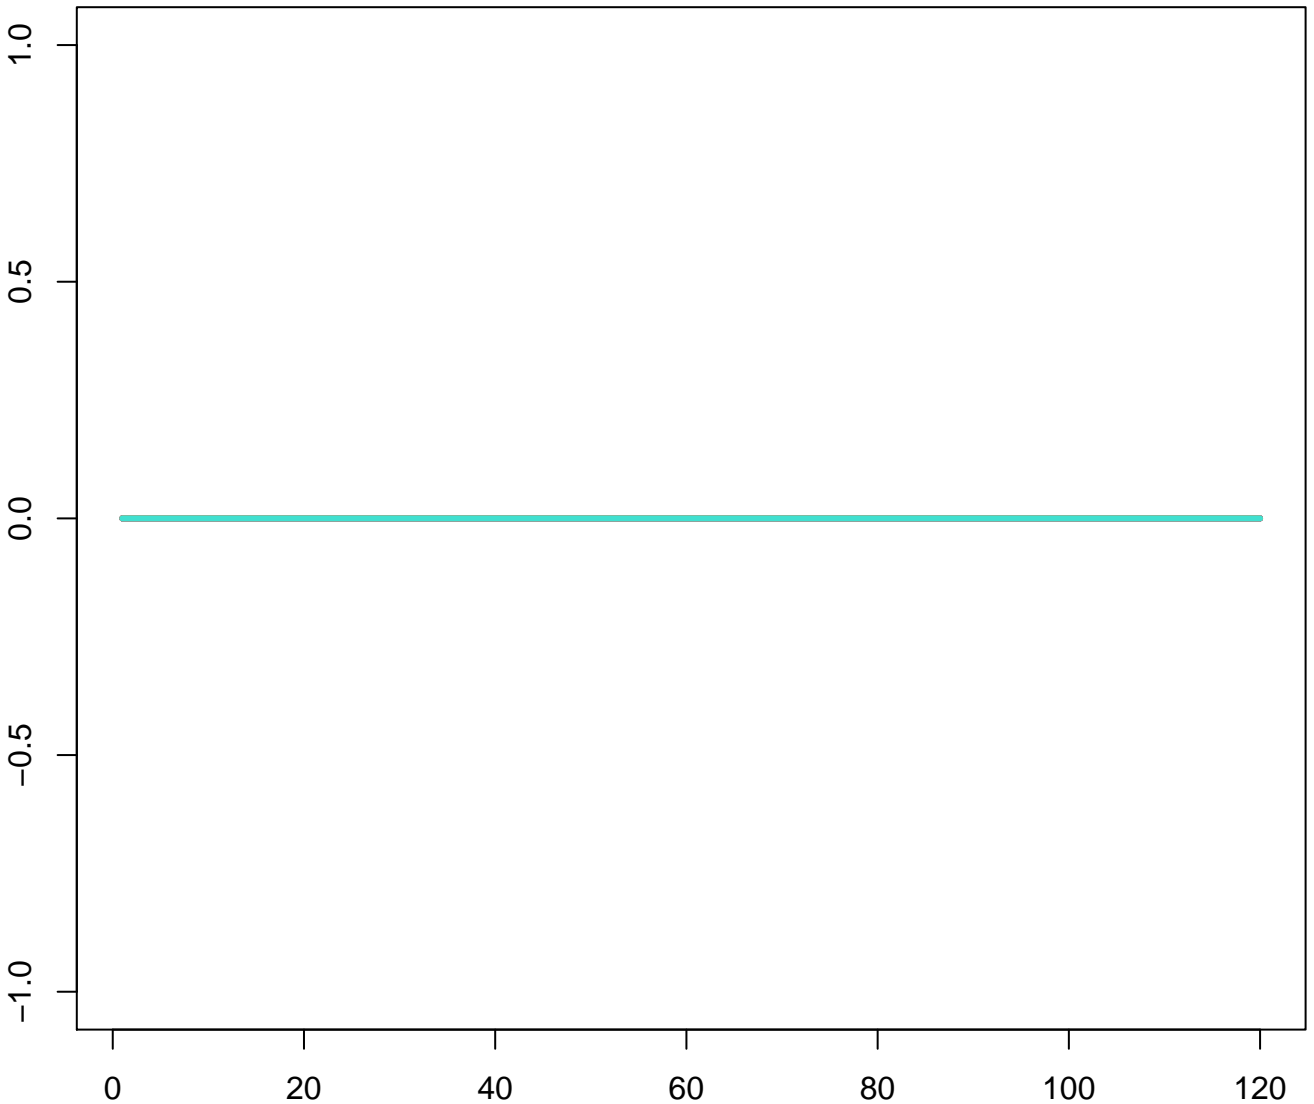

blood brain heart kidney lung ovary skin muscle testis

# 10\_20033388-20033472(-)\_cfa-let-7b\_high

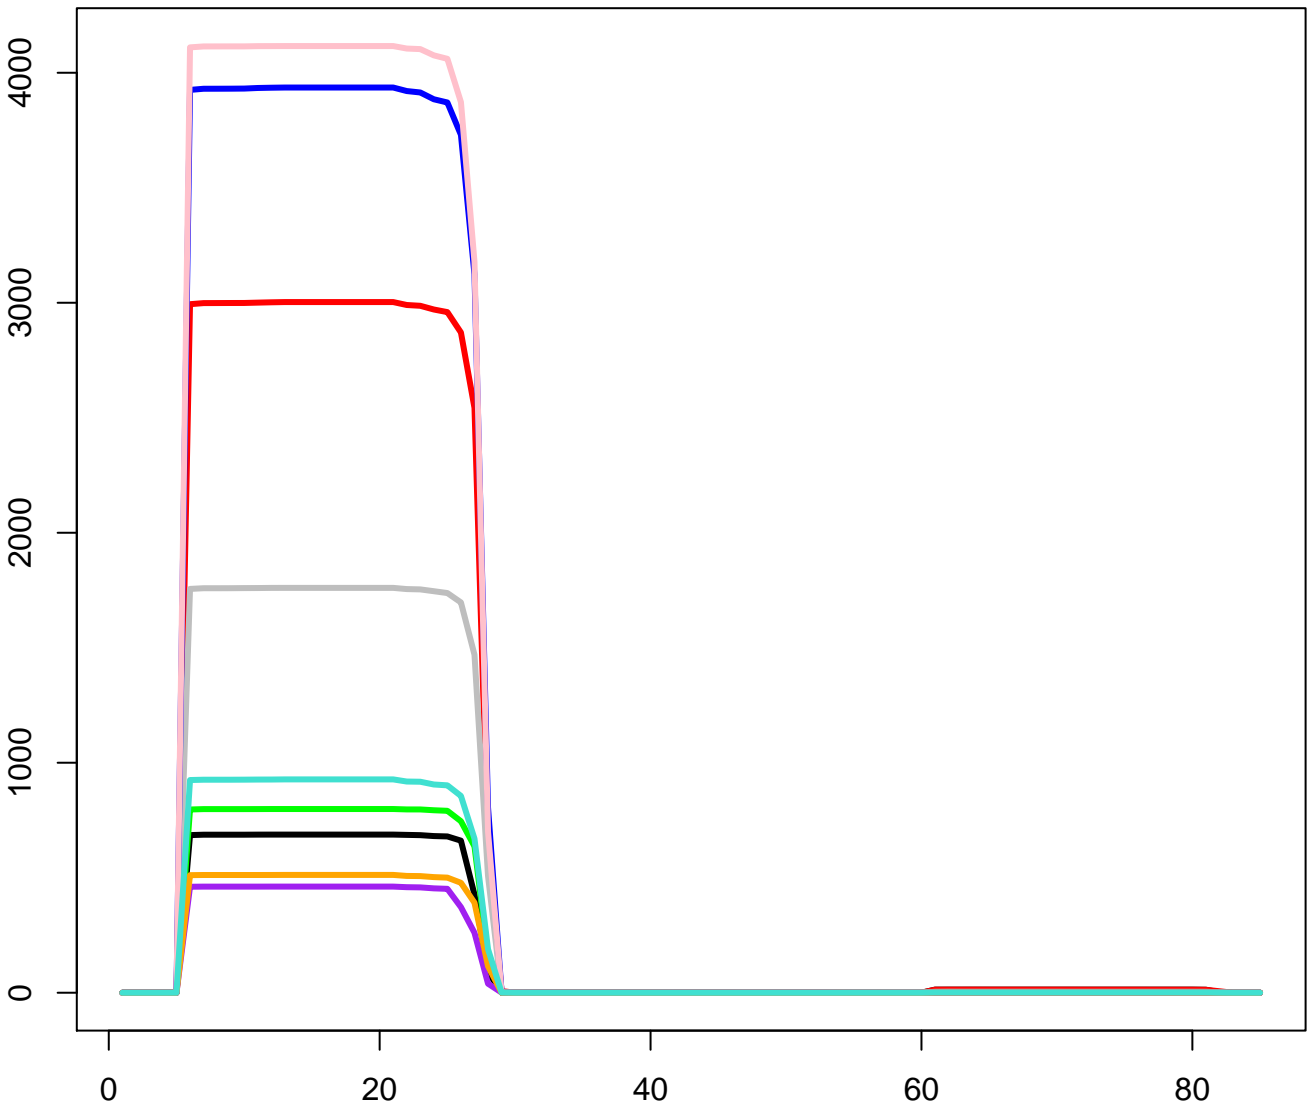

— blood — brain — heart — kidney — lung — ovary — skin — muscle — testis

# 10\_20034319-20034387(-)\_cfa-let-7a-1\_high

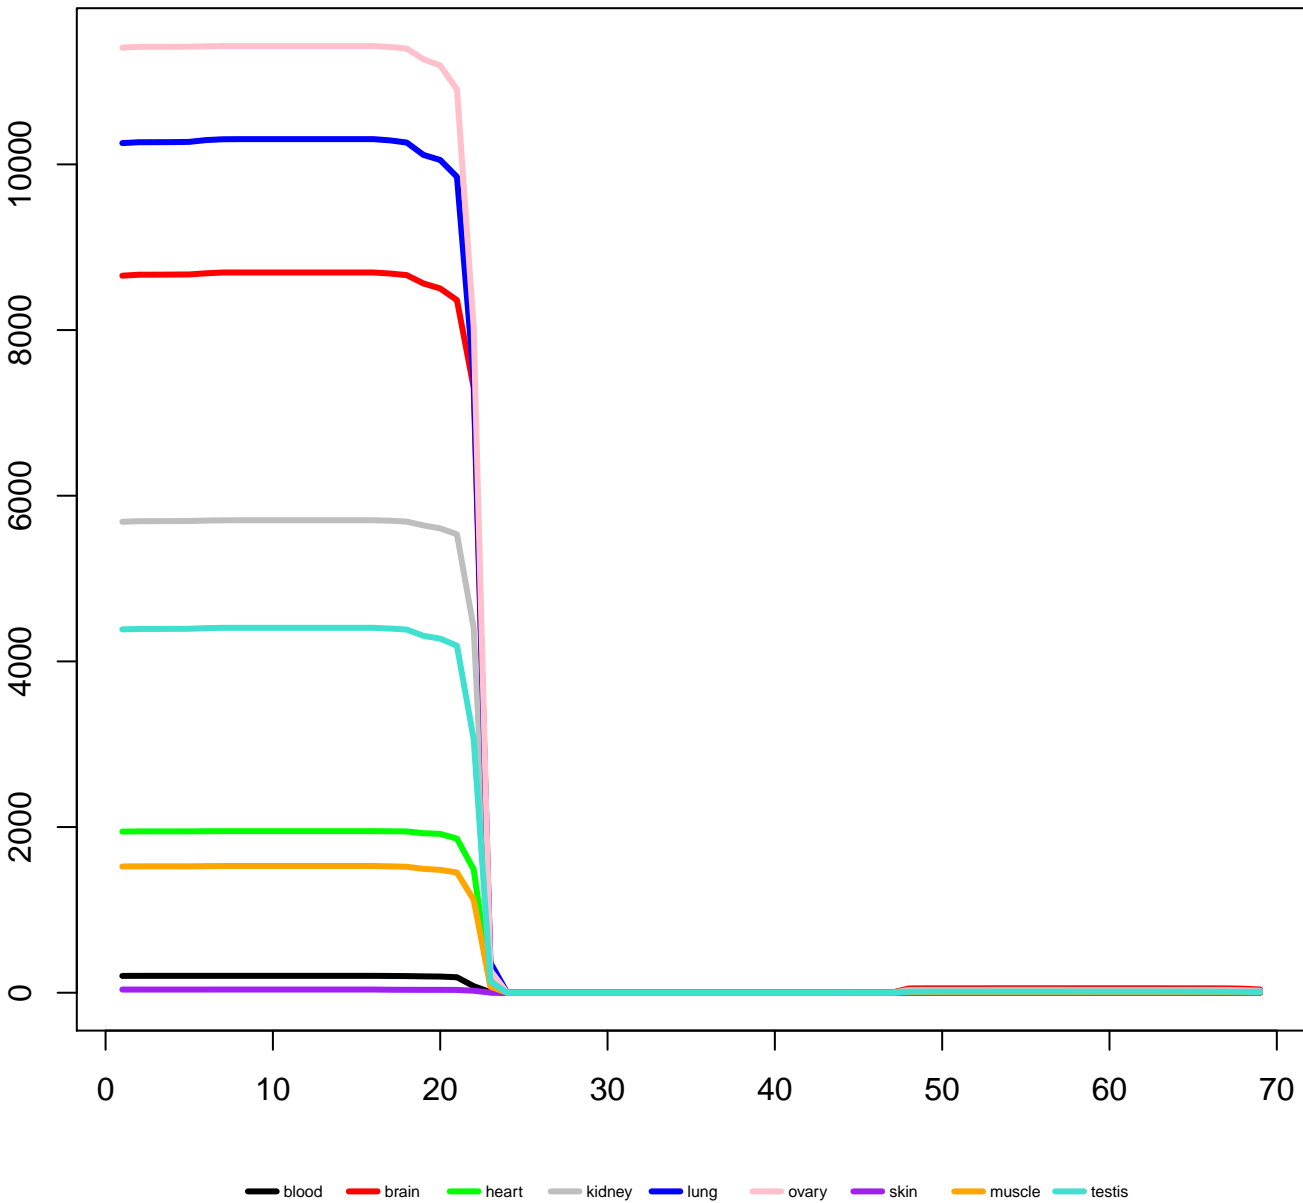

# 10\_20818801-20818939(+)\_cfa-mir-1249\_high

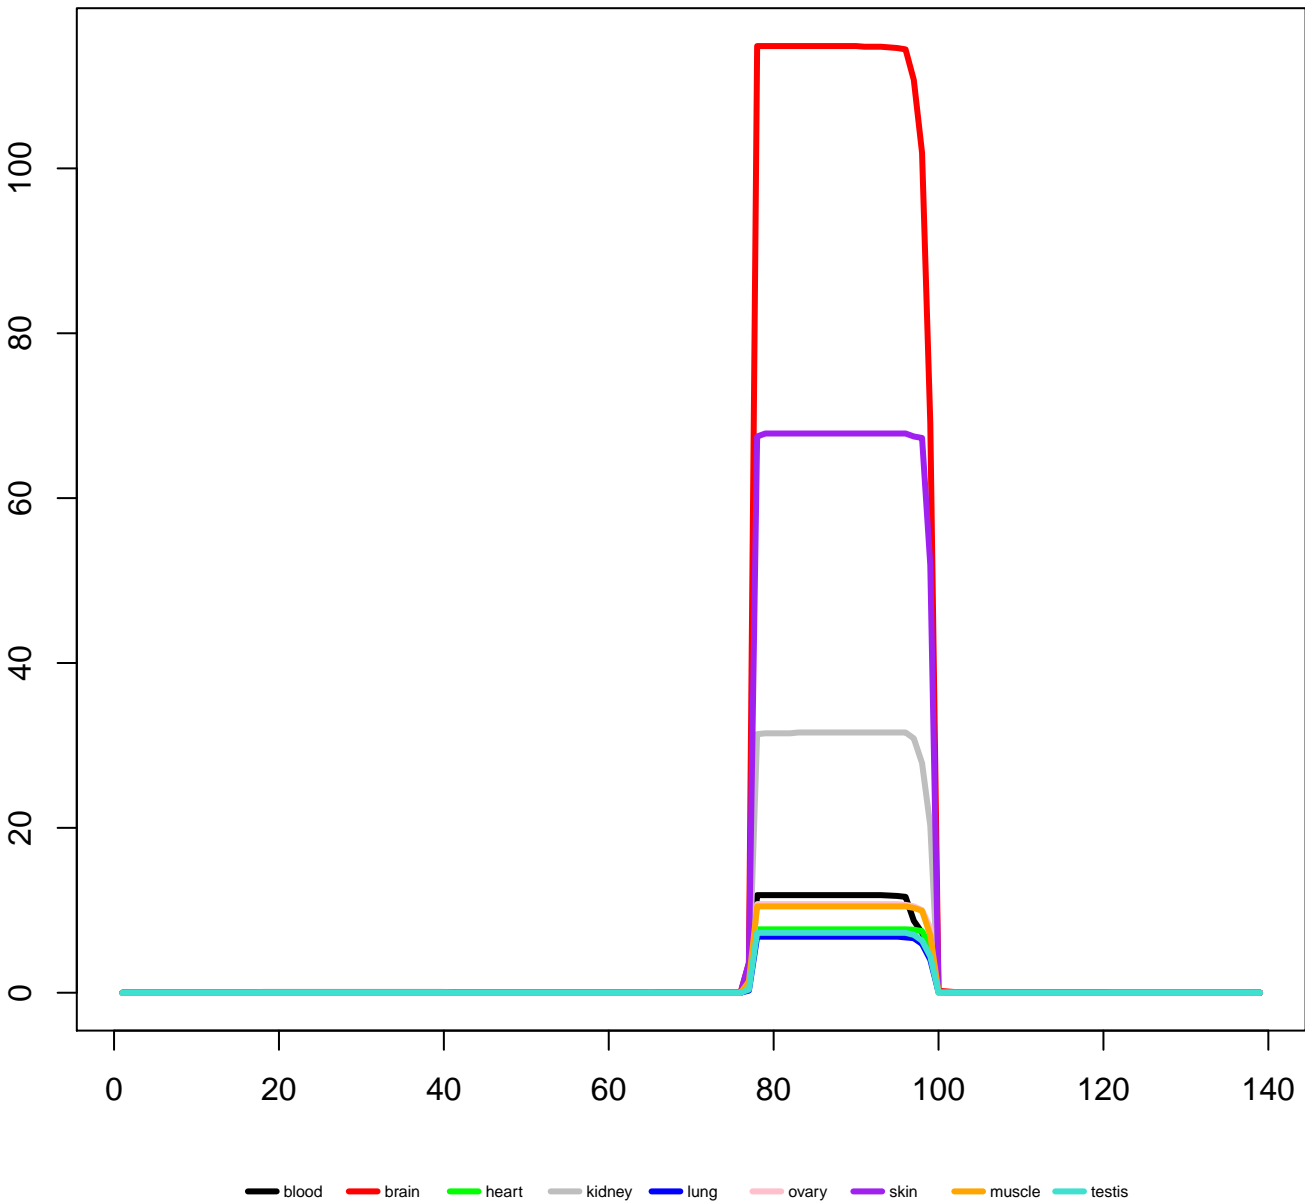



# 10\_23246268-23246392(+)\_cfa-mir-8829\_high

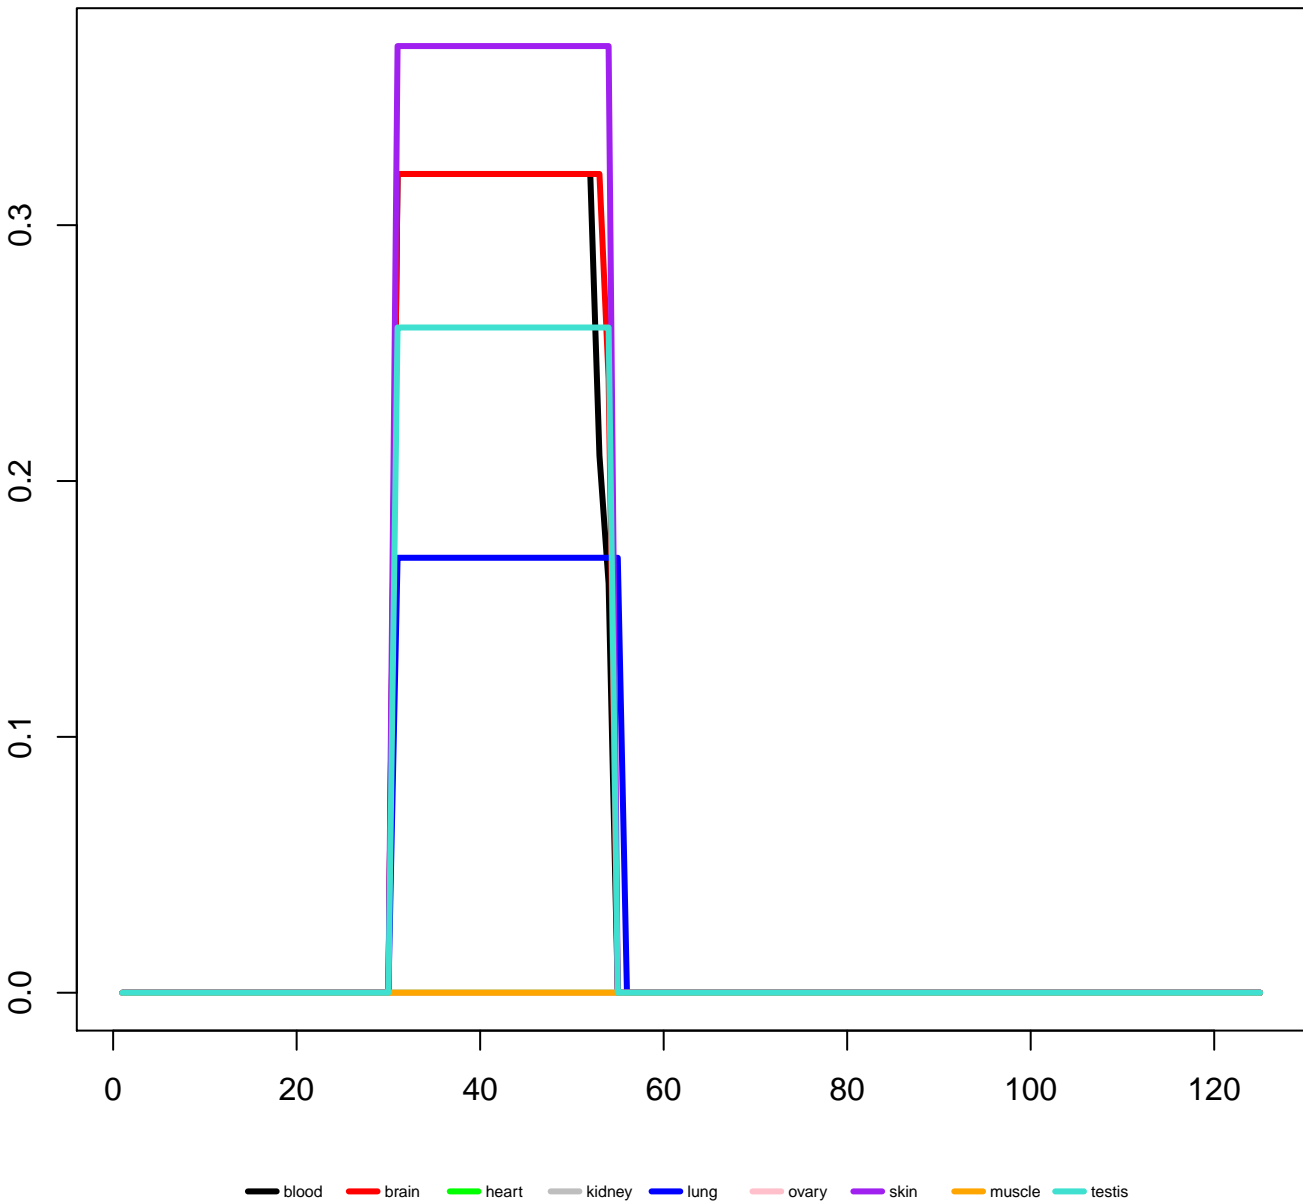

# 10\_23456613-23456673(-)\_cfa-mir-33a\_high

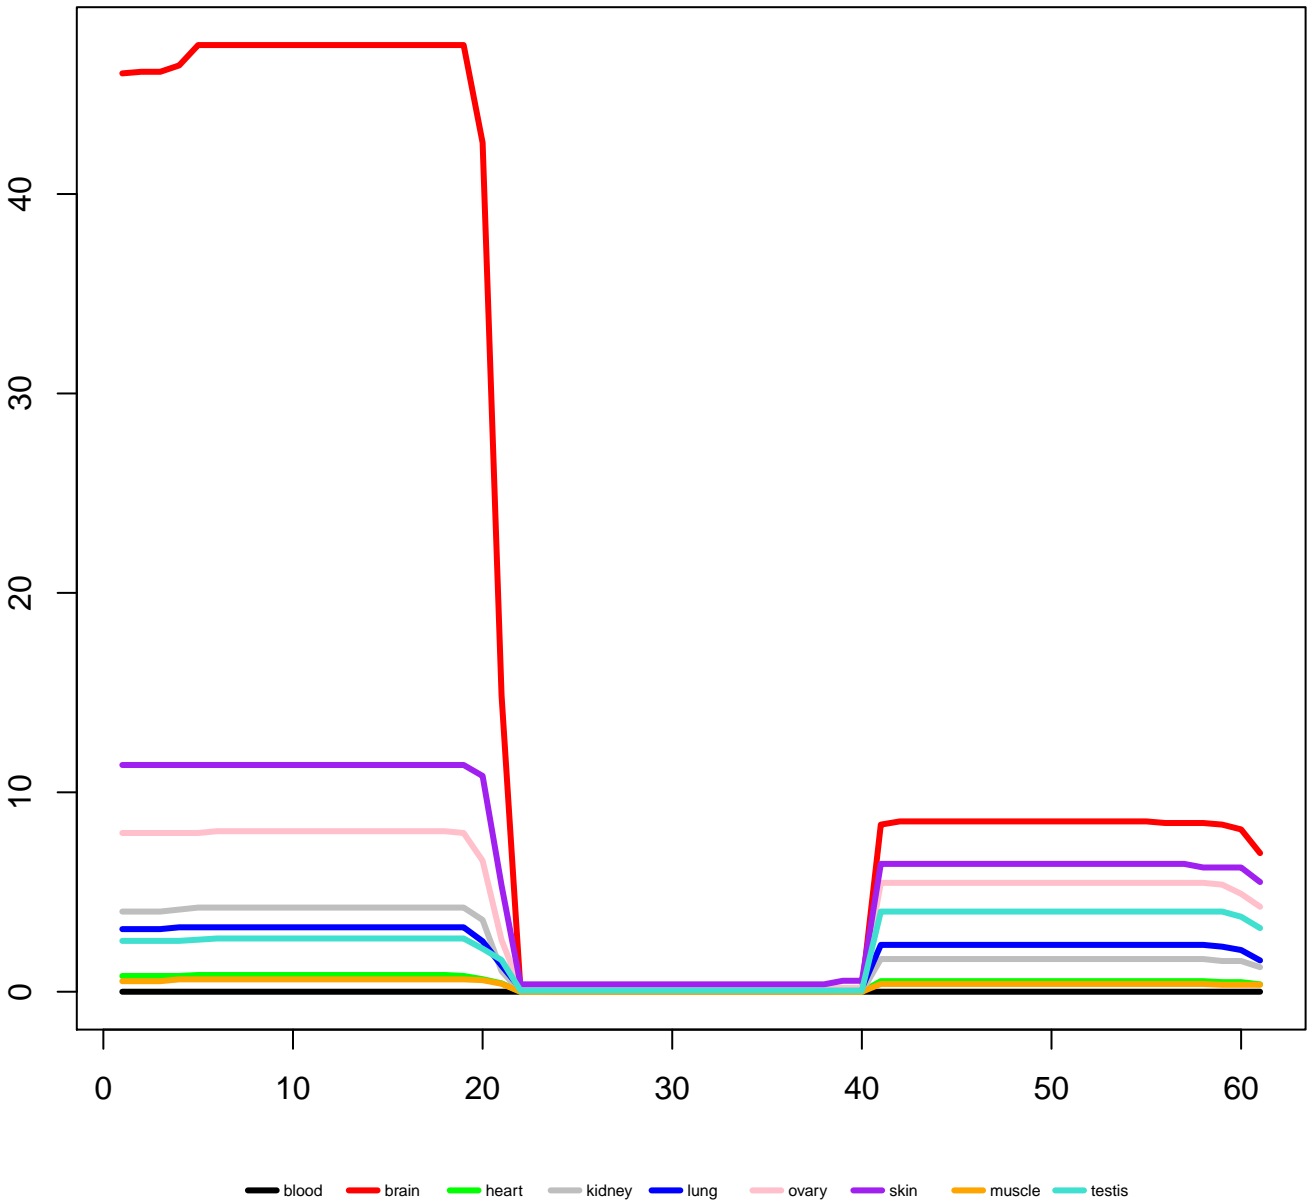

# 10\_24665092-24665159(+)\_mir-2439\_low

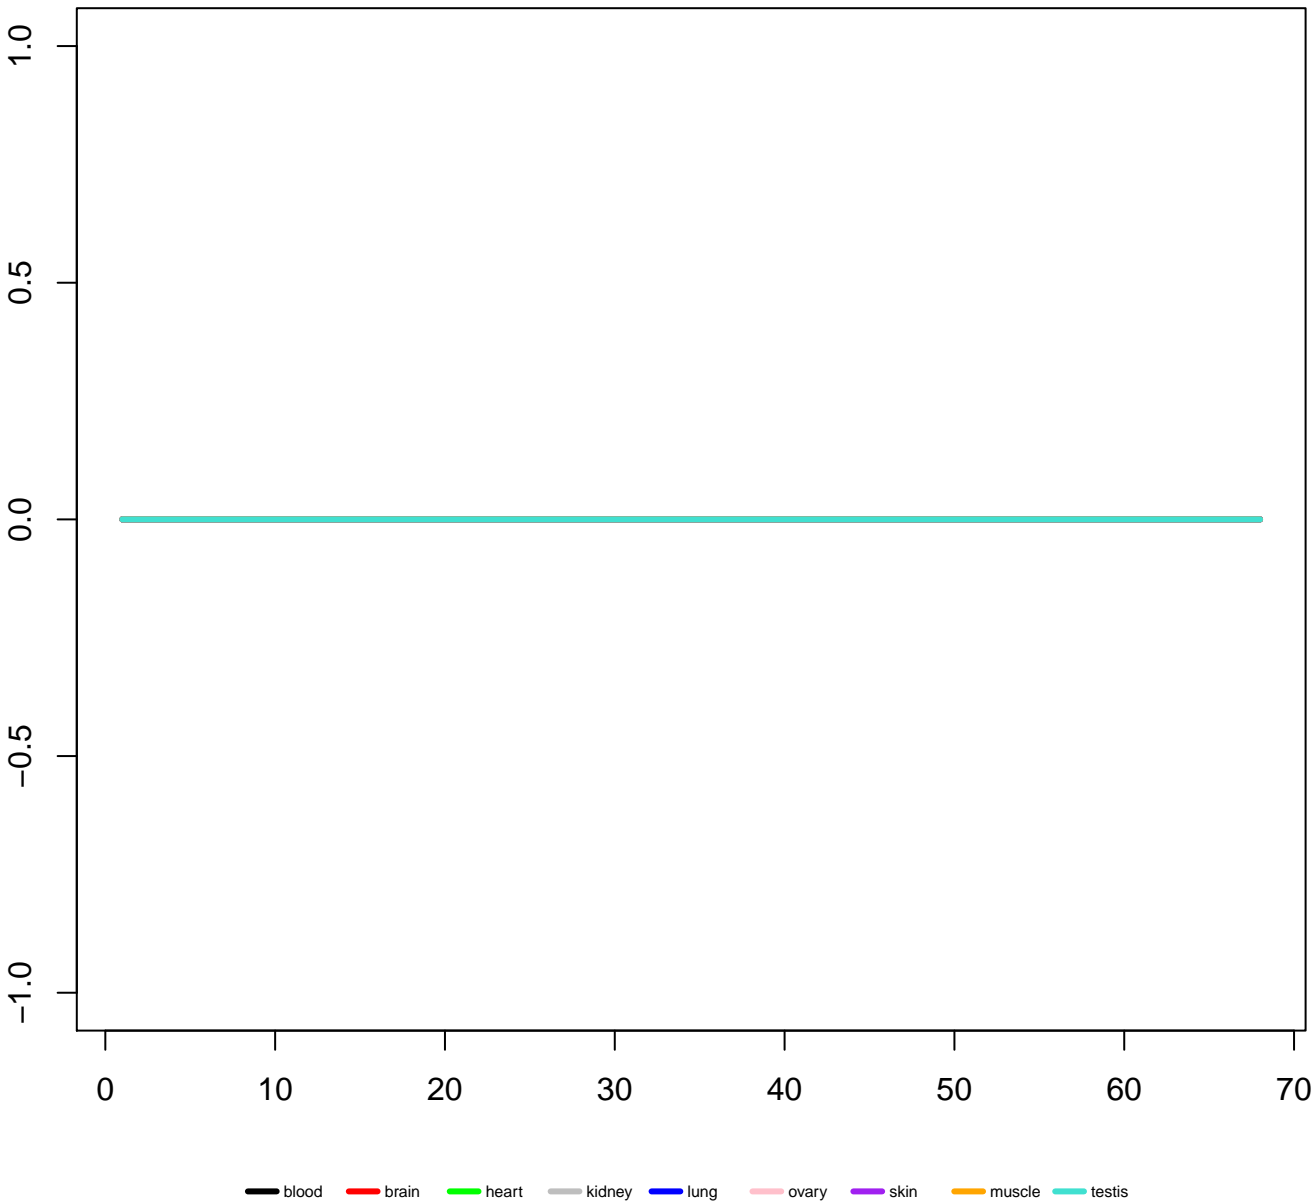



# 10\_27182717-27182861(-)\_cfa-mir-8828\_low

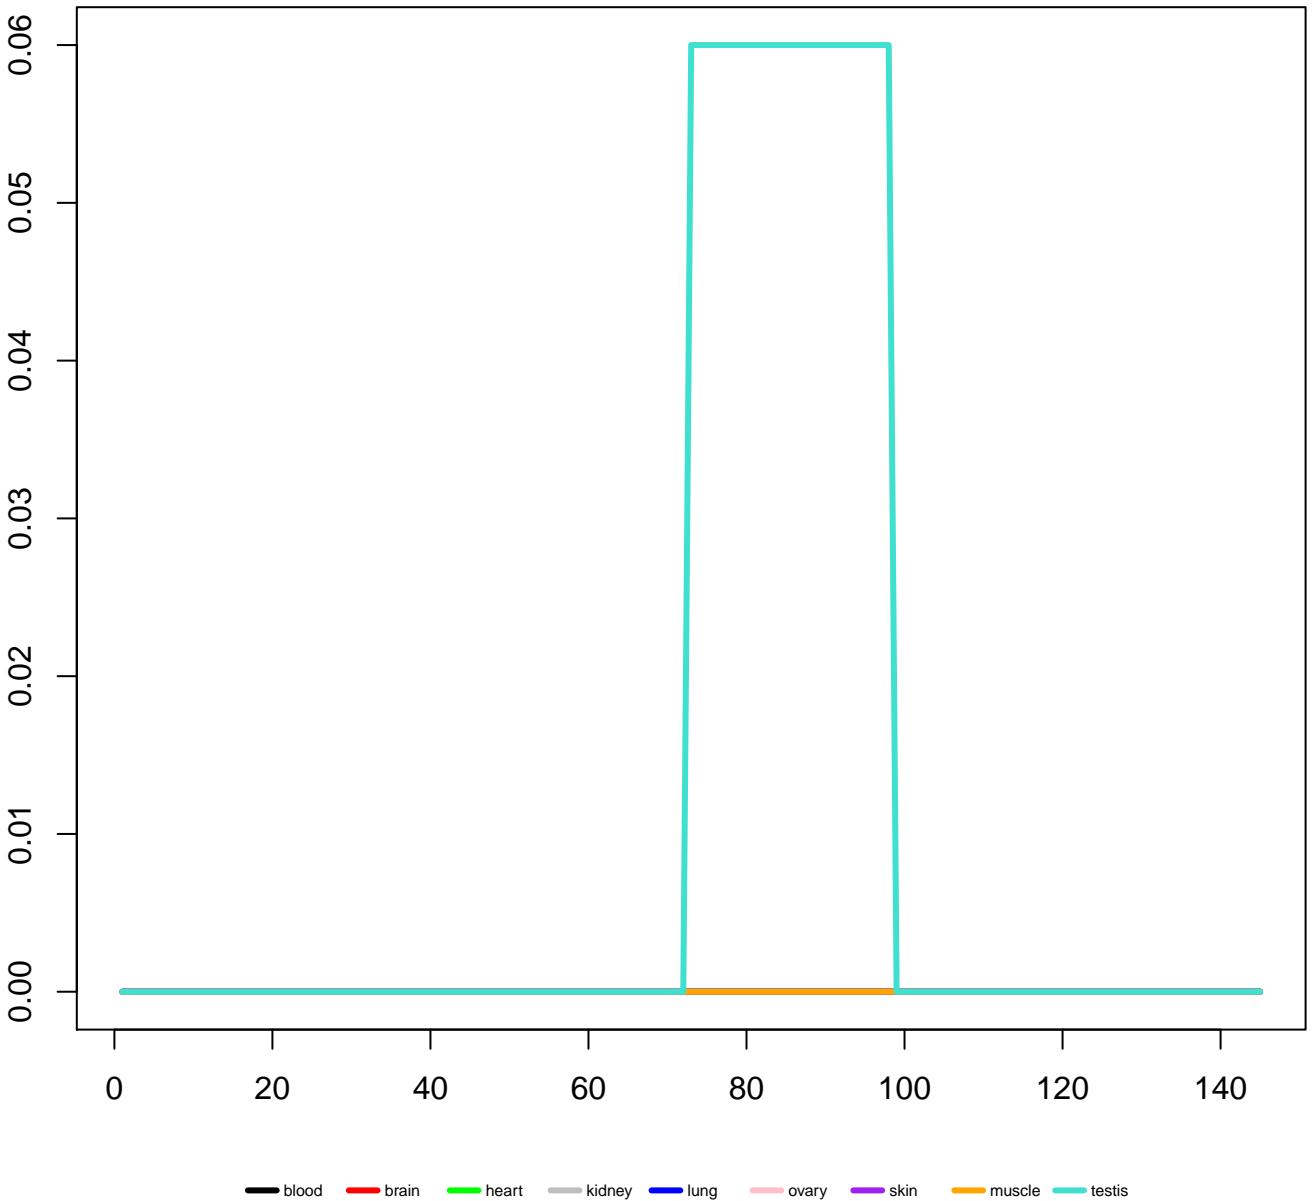

# 10\_27296054-27296114(+)\_cfa-mir-1835\_high

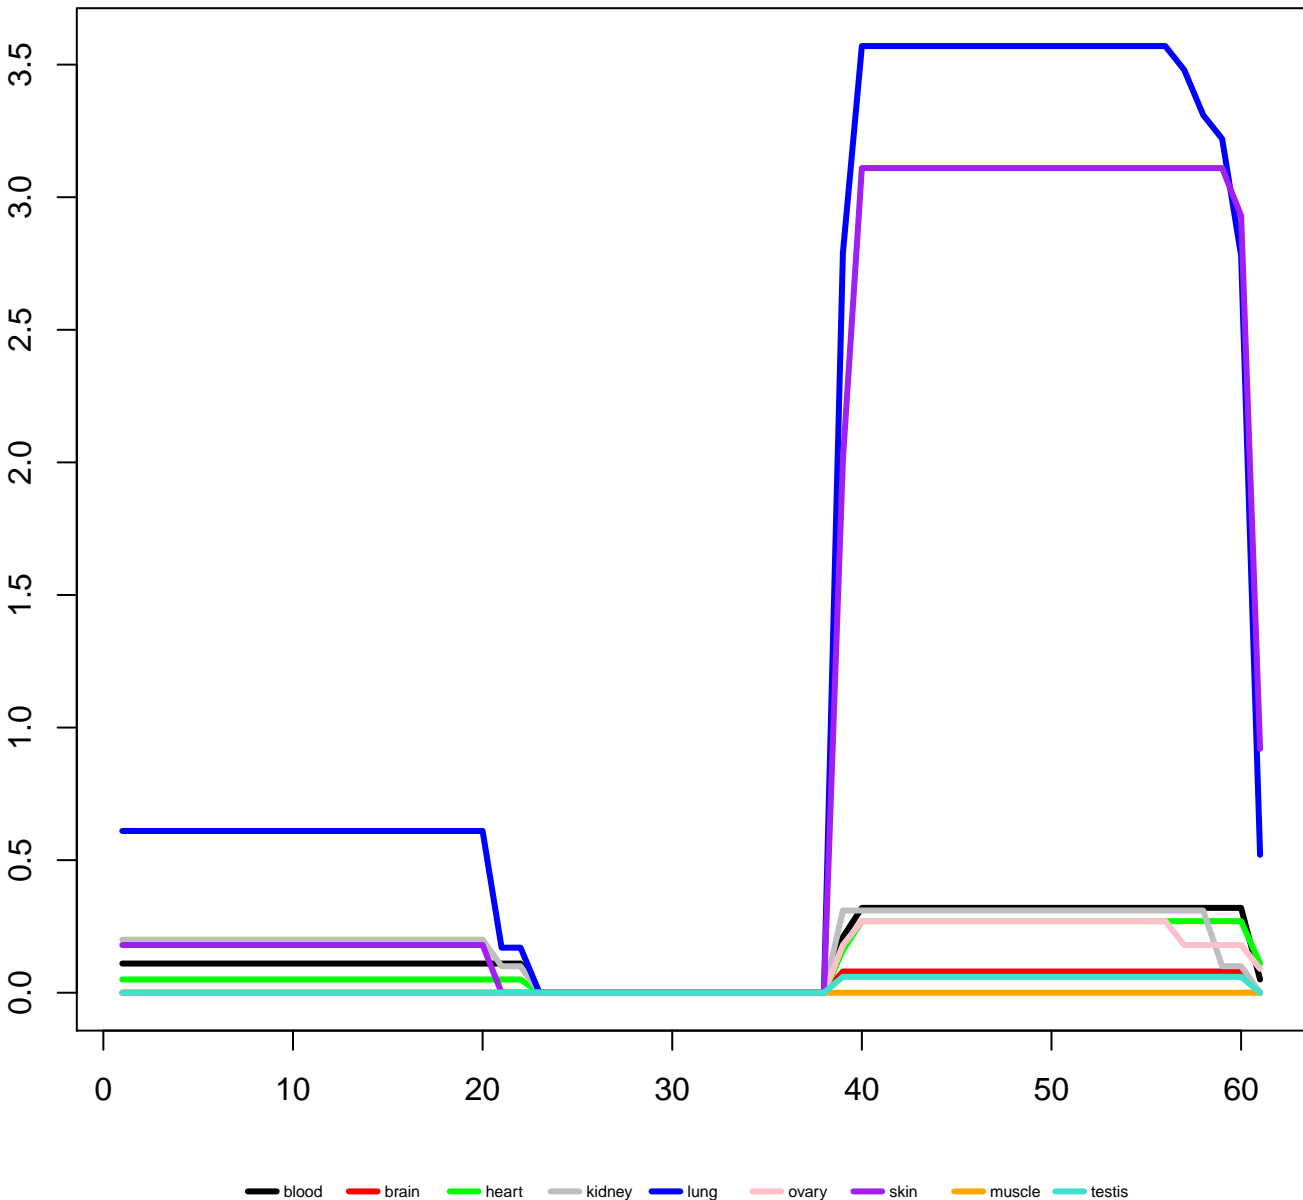

# 10\_27860823-27860965(-)\_cfa-mir-8827\_low

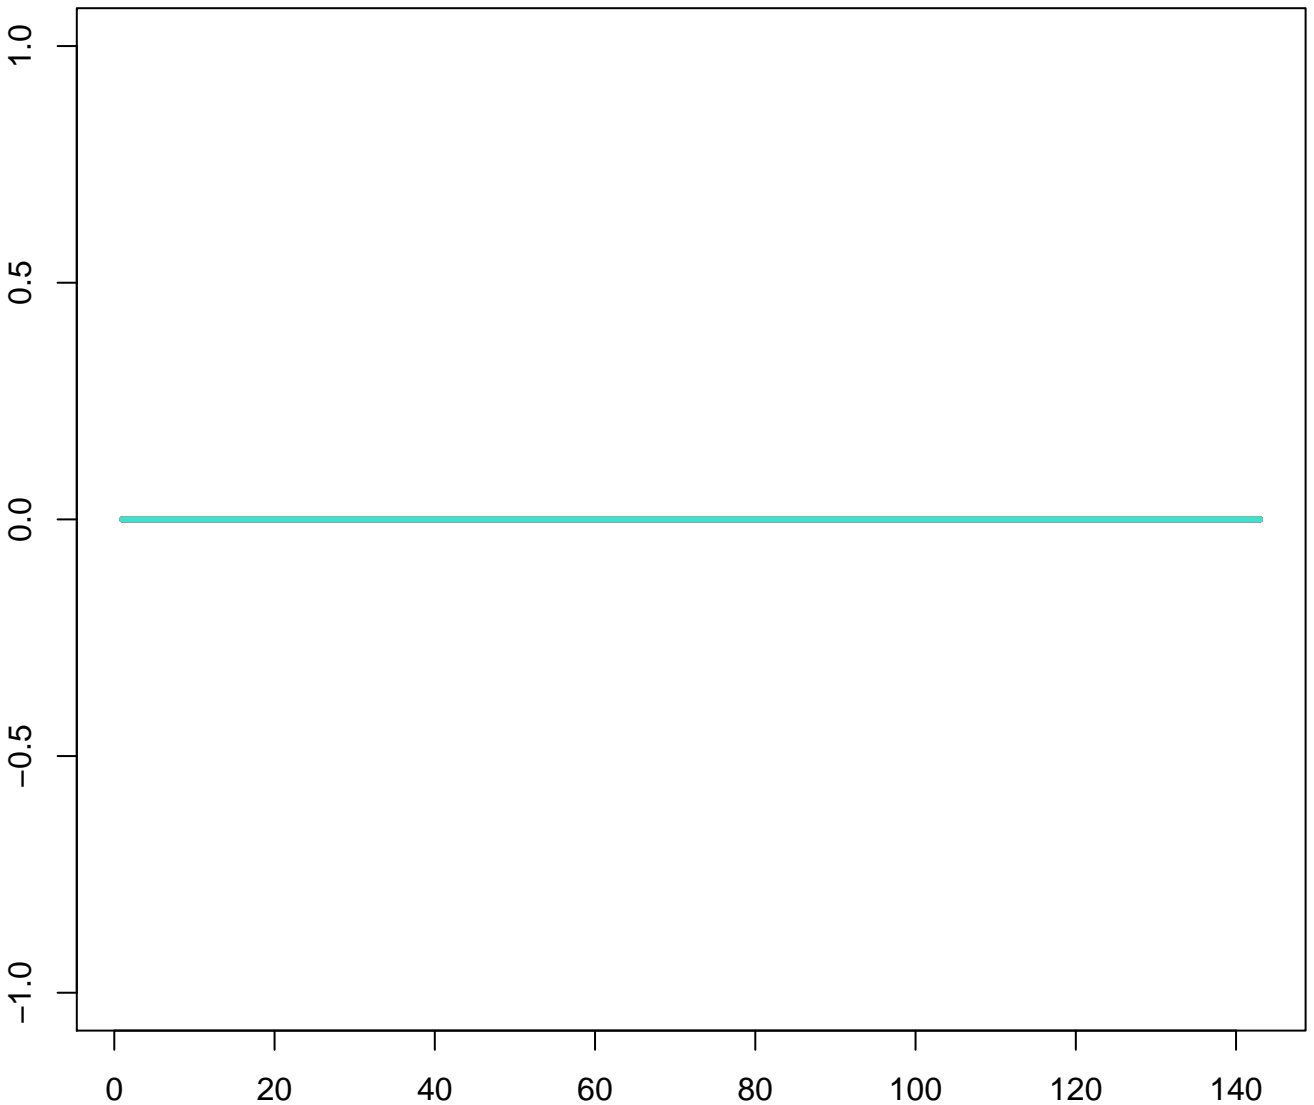

blood brain heart kidney lung ovary skin muscle testis

# 10\_37131530-37131664(-)\_cfa-mir-8799c\_low

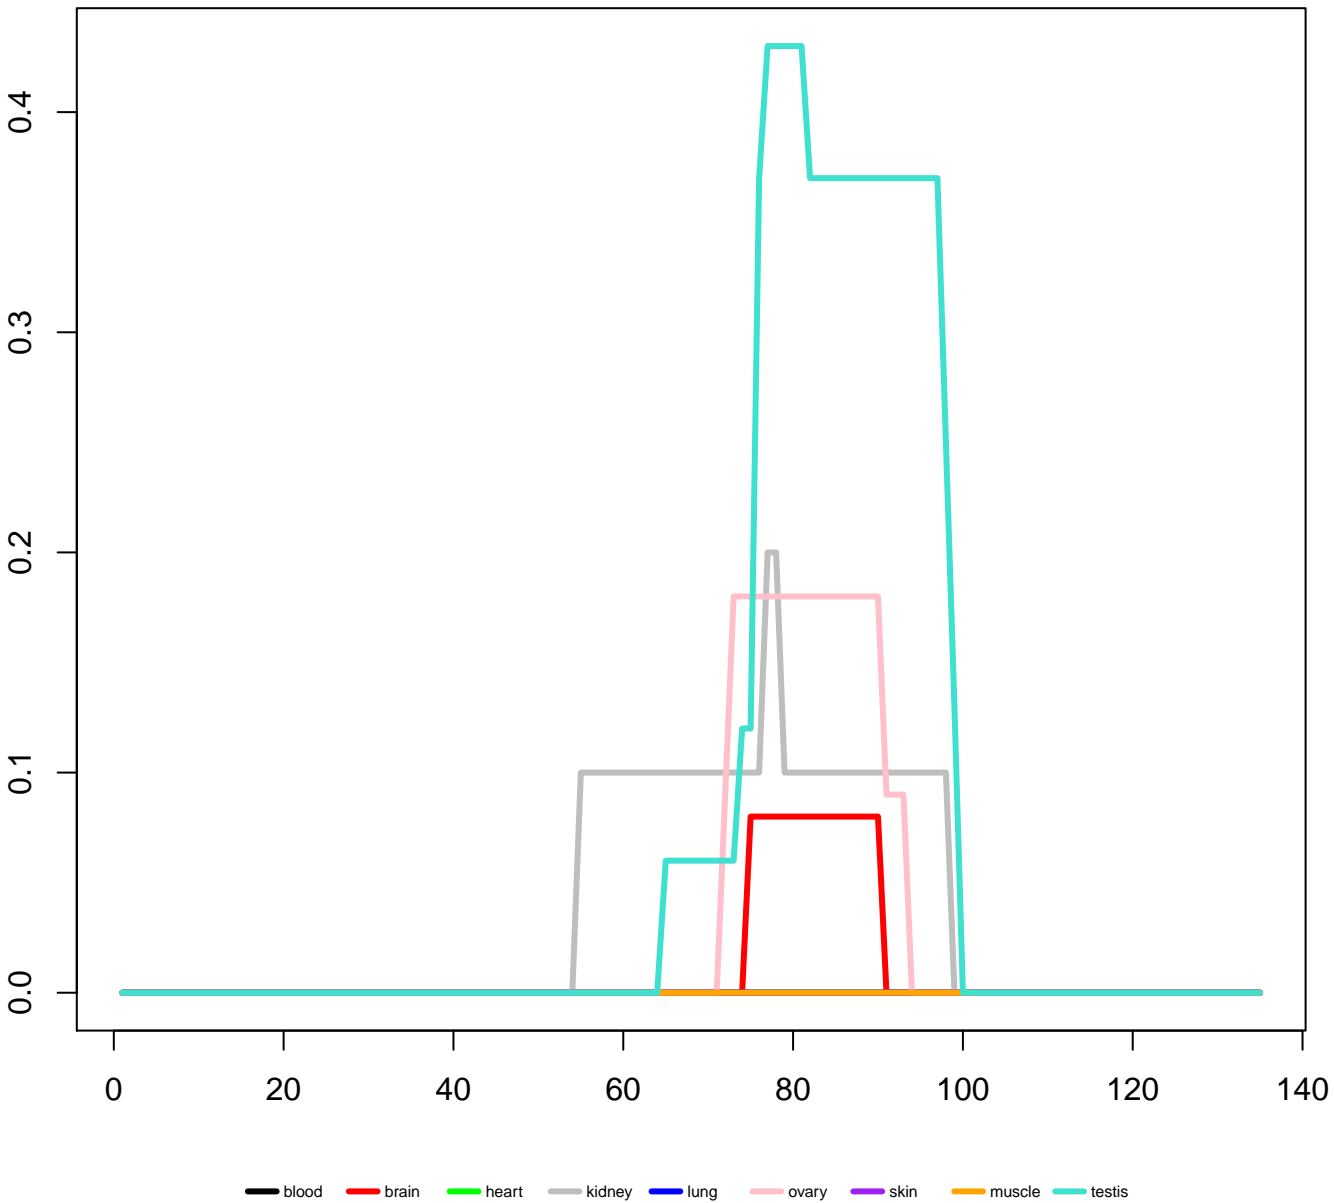



# 10\_40365571-40365667(-)\_cfa-mir-8826\_high

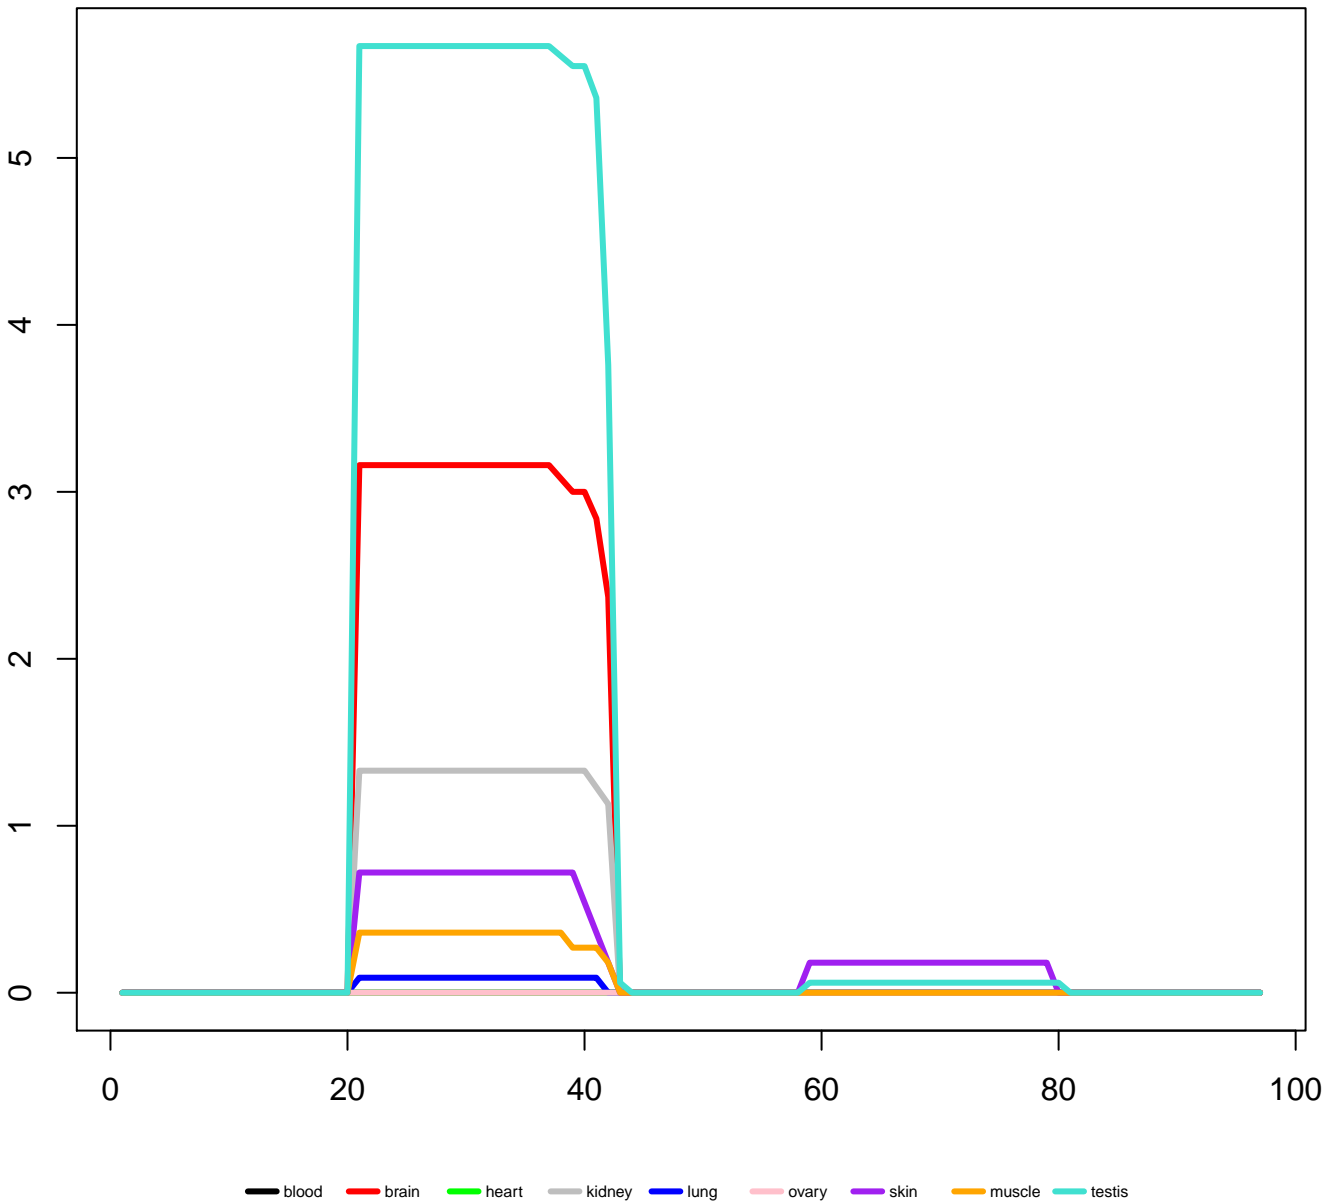

# 10\_45159756-45159897(-)\_mir-9144\_low

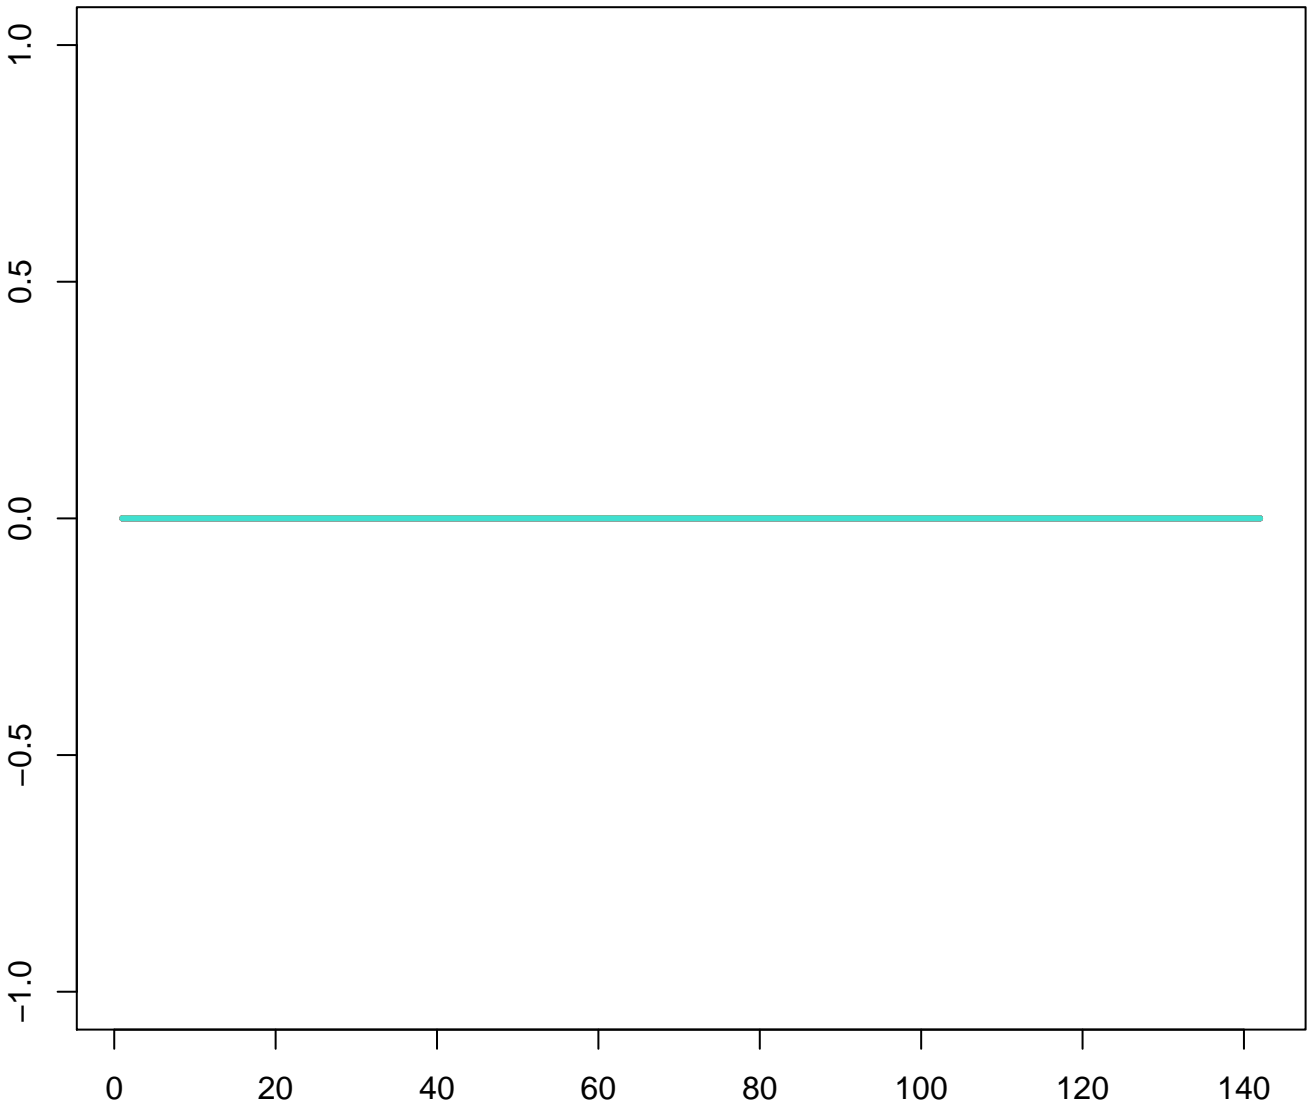

blood brain heart kidney lung ovary skin muscle testis

# 10\_52666322-52666466(+)\_mir-9153\_low

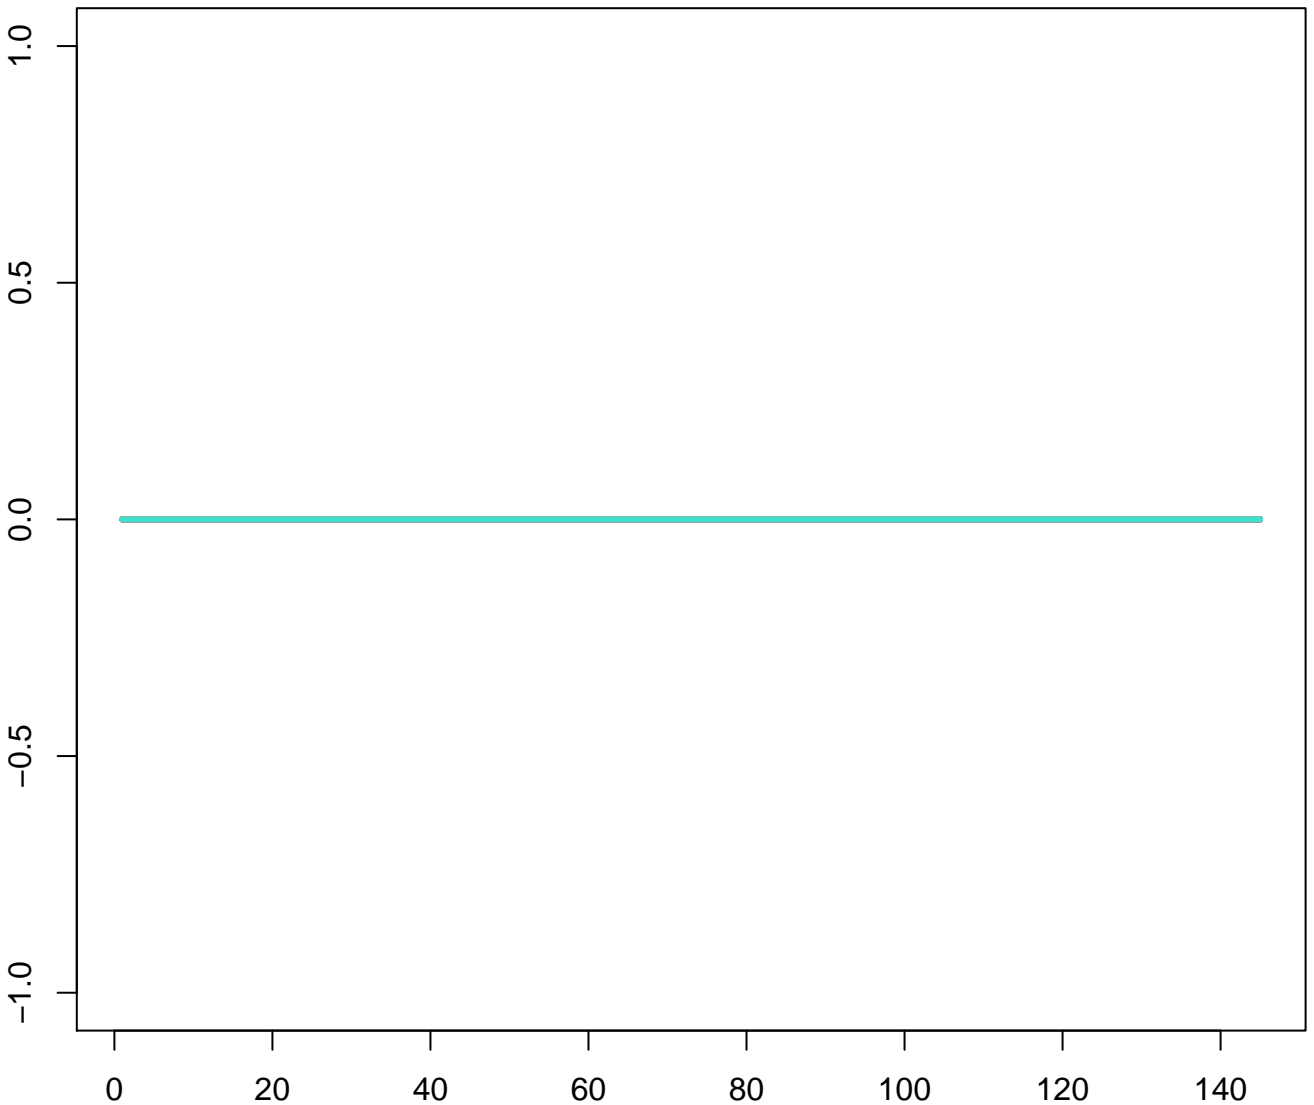

blood brain heart kidney lung ovary skin muscle testis

# 10\_56754566-56754647(-)\_cfa-mir-217\_high

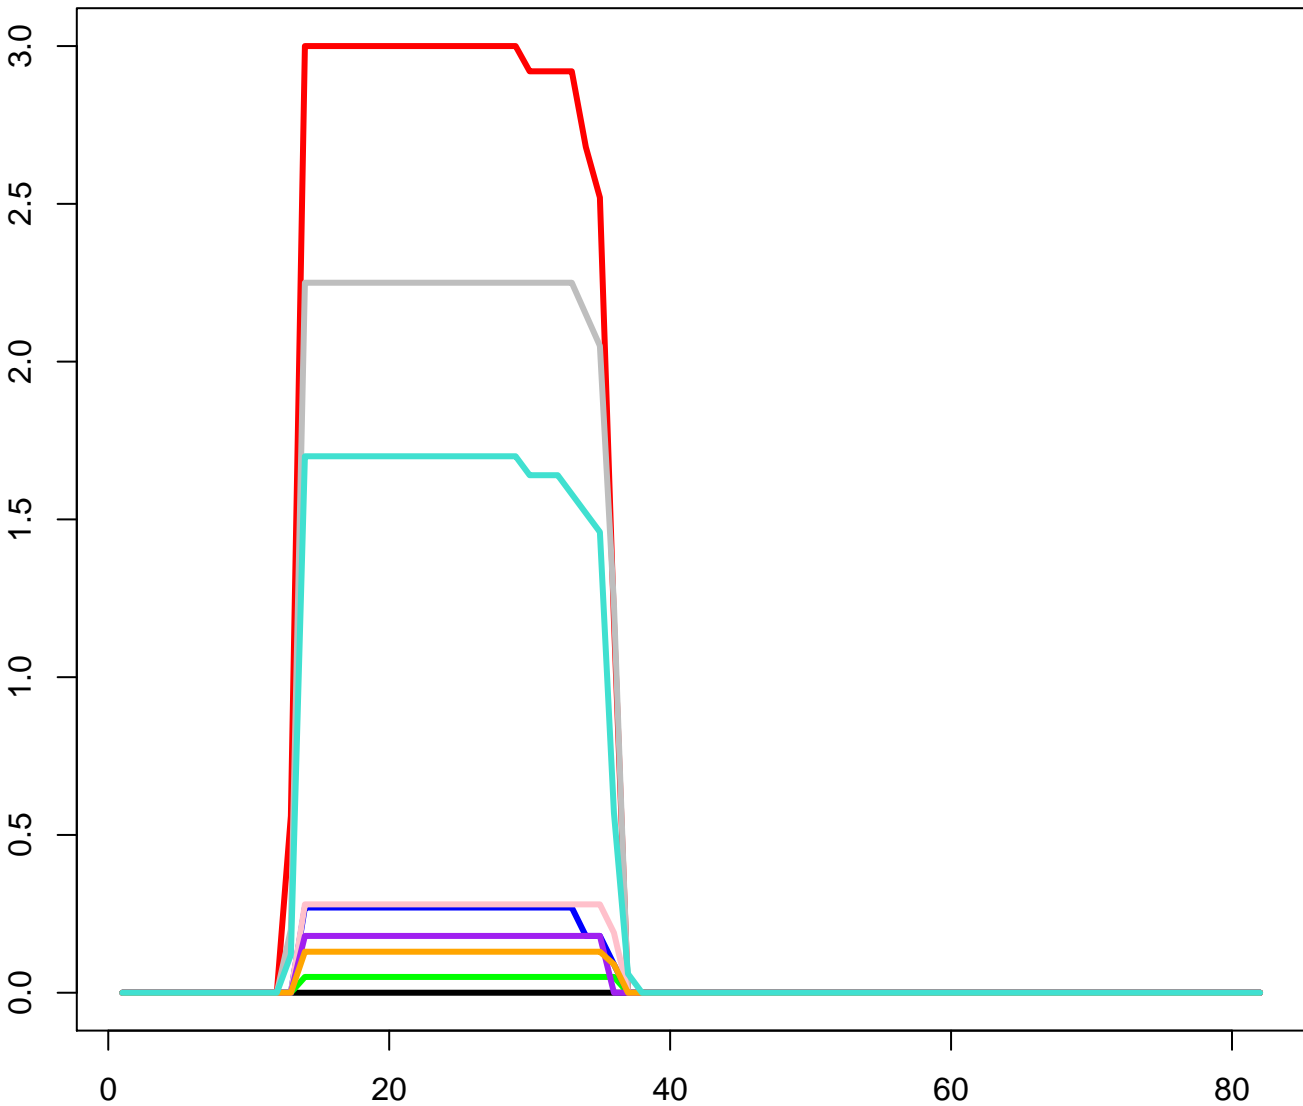

blood brain heart kidney lung ovary skin muscle testis

# 10\_56761430-56761534(-)\_cfa-mir-216a\_high

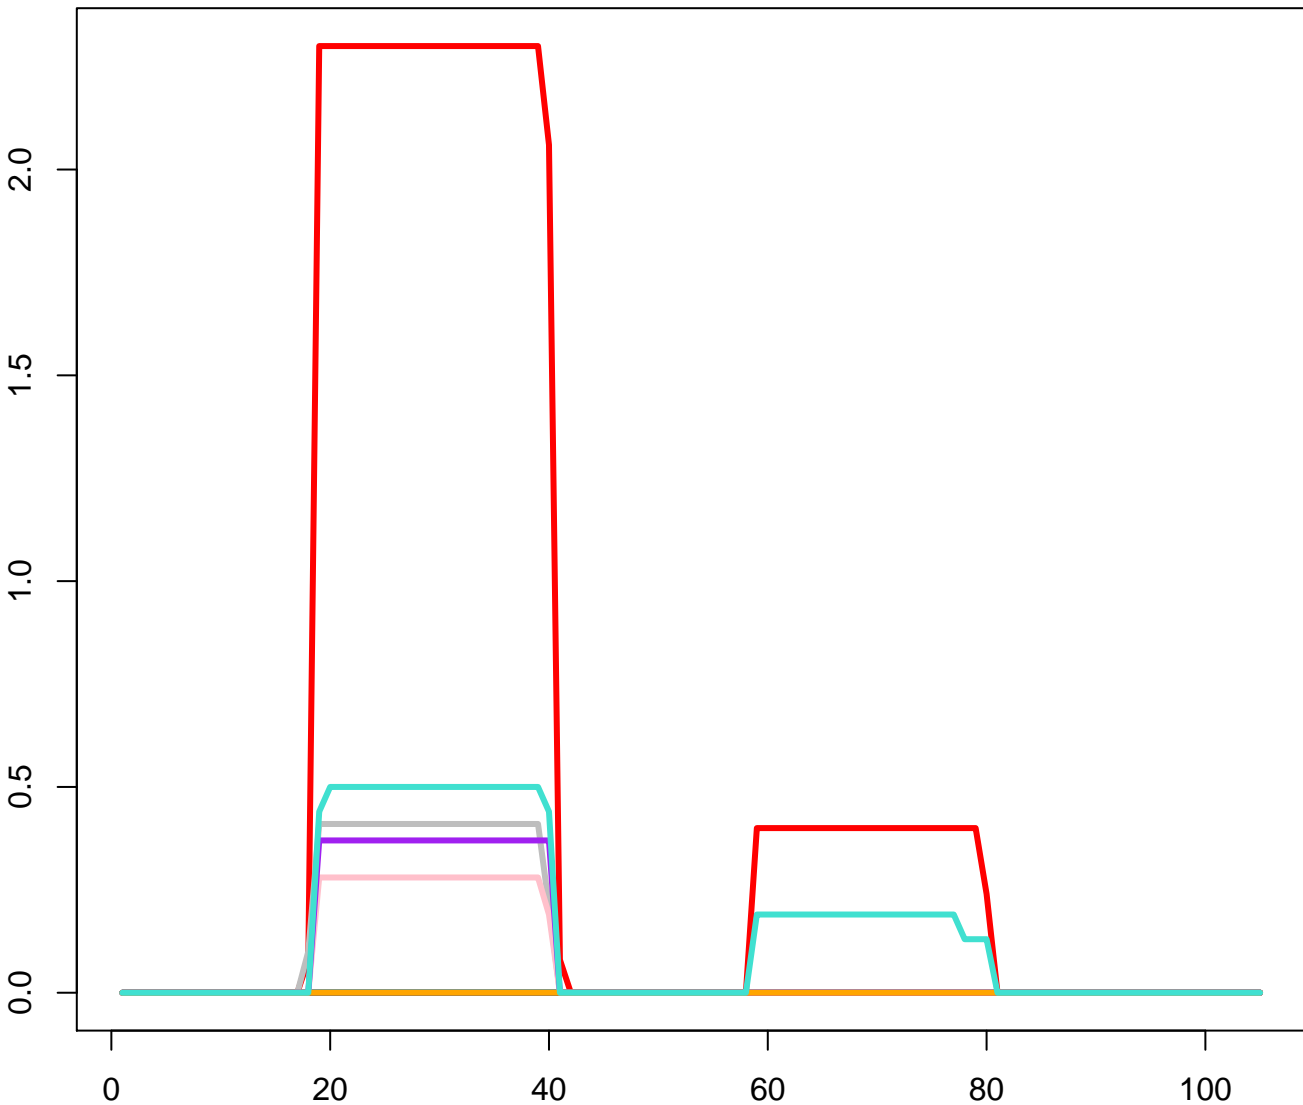

— blood — brain — heart — kidney — lung — ovary — skin — muscle — testis

# 10\_56772853-56772914(-)\_cfa-mir-216b\_high

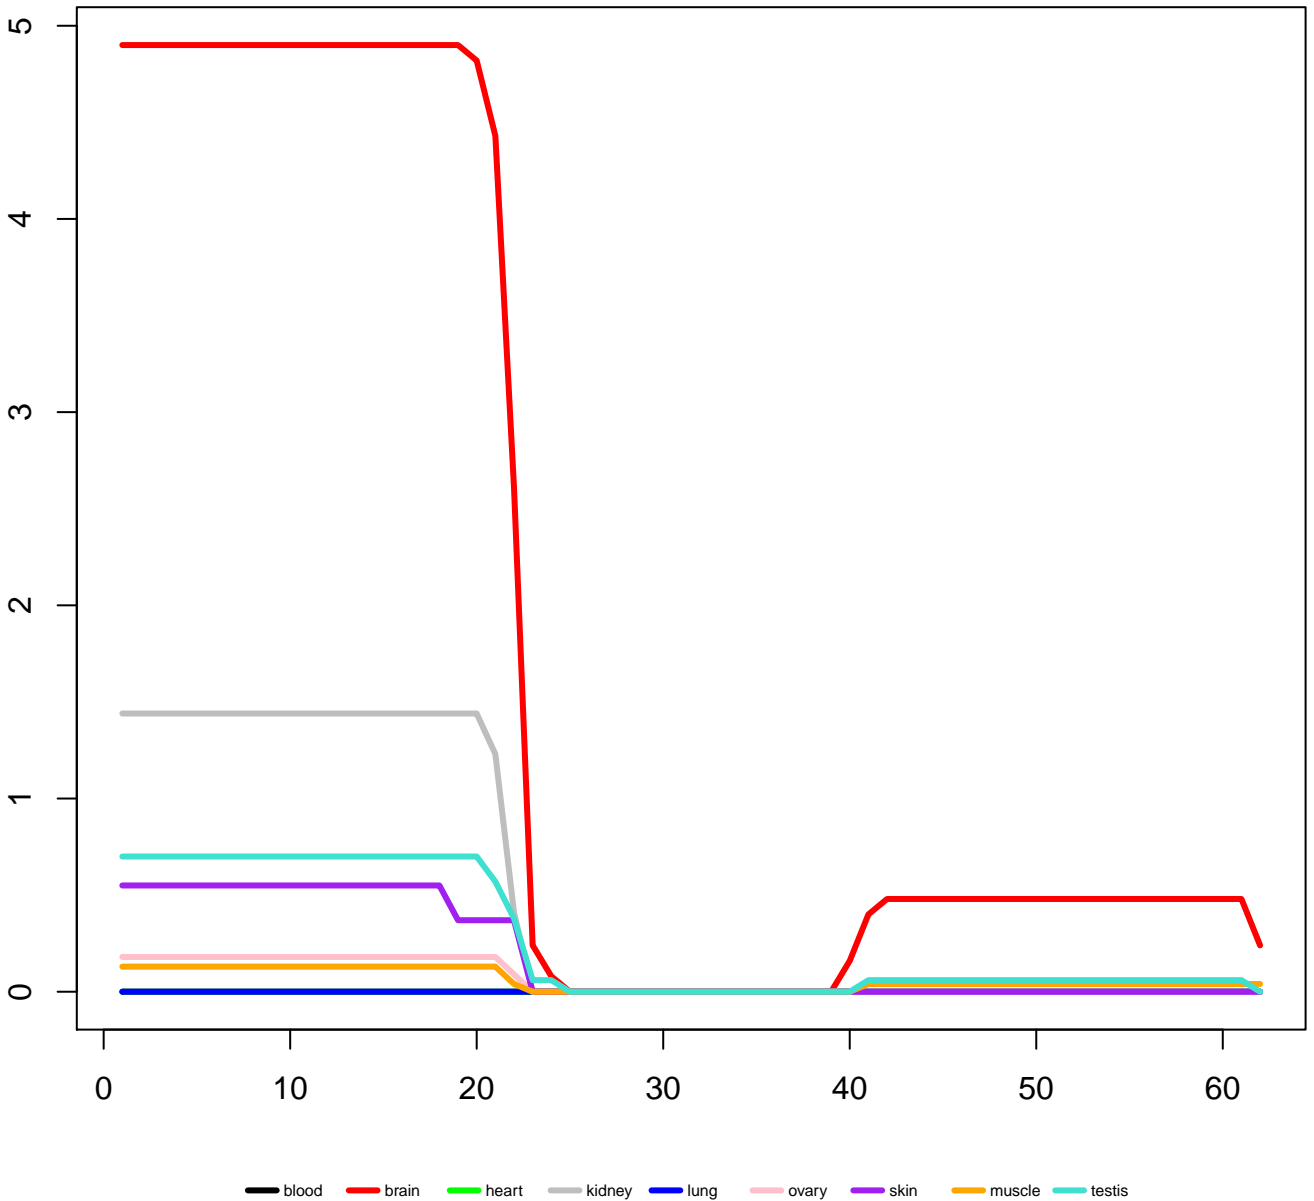

# 11\_1704582-1704673(+)\_cfa-mir-340\_high

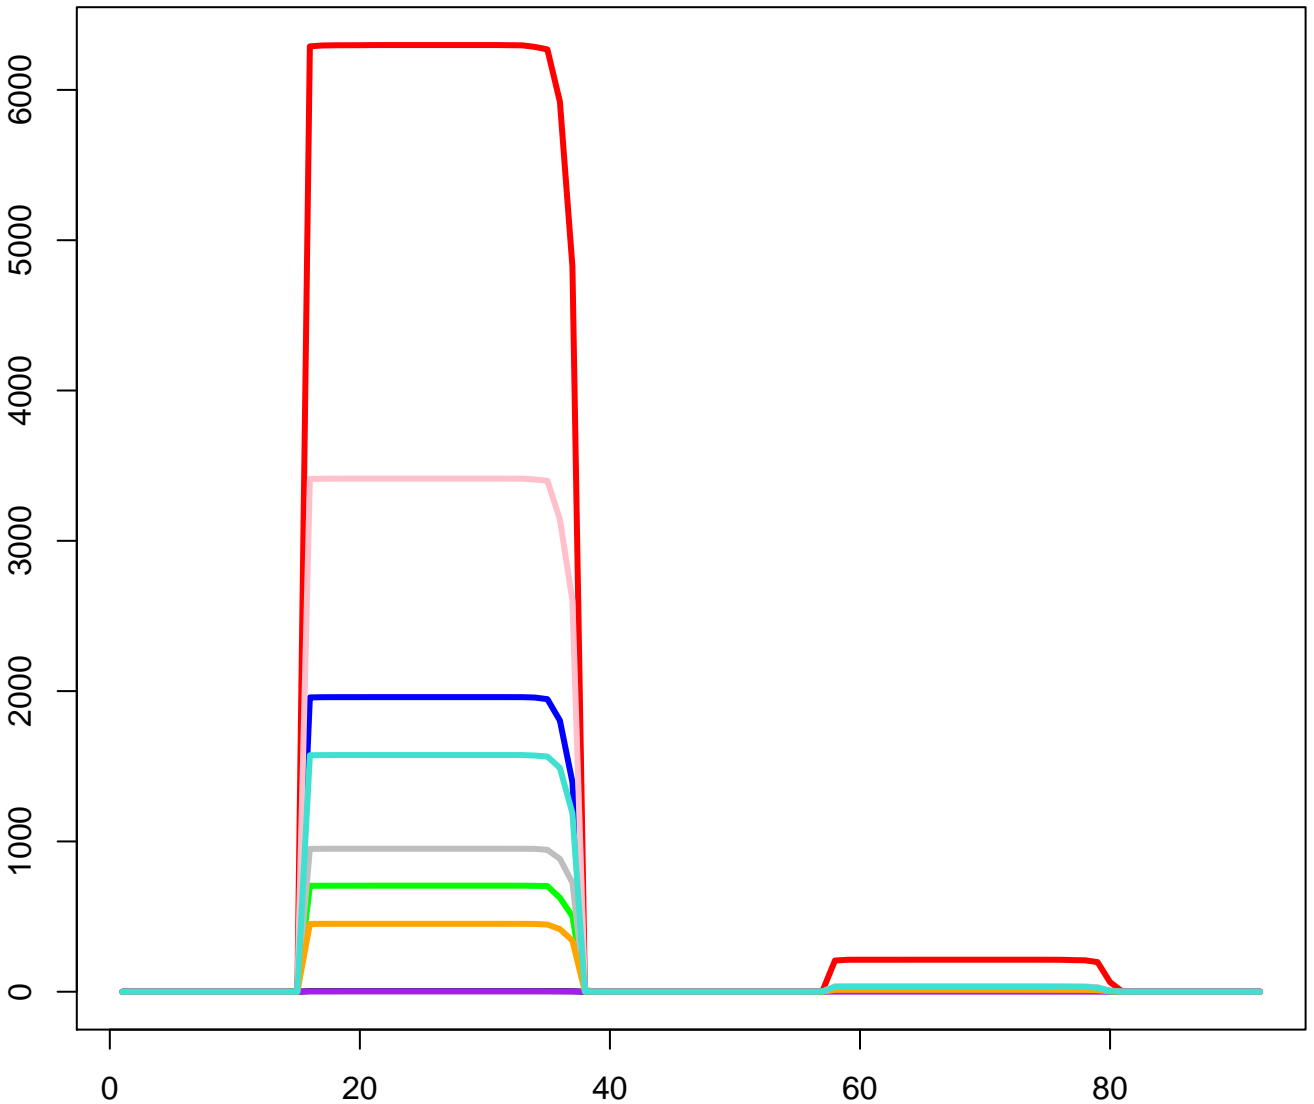

— blood — brain — heart — kidney — lung — ovary — skin — muscle — testis

# 11\_14017075-14017159(-)\_cfa-mir-8830-2\_low

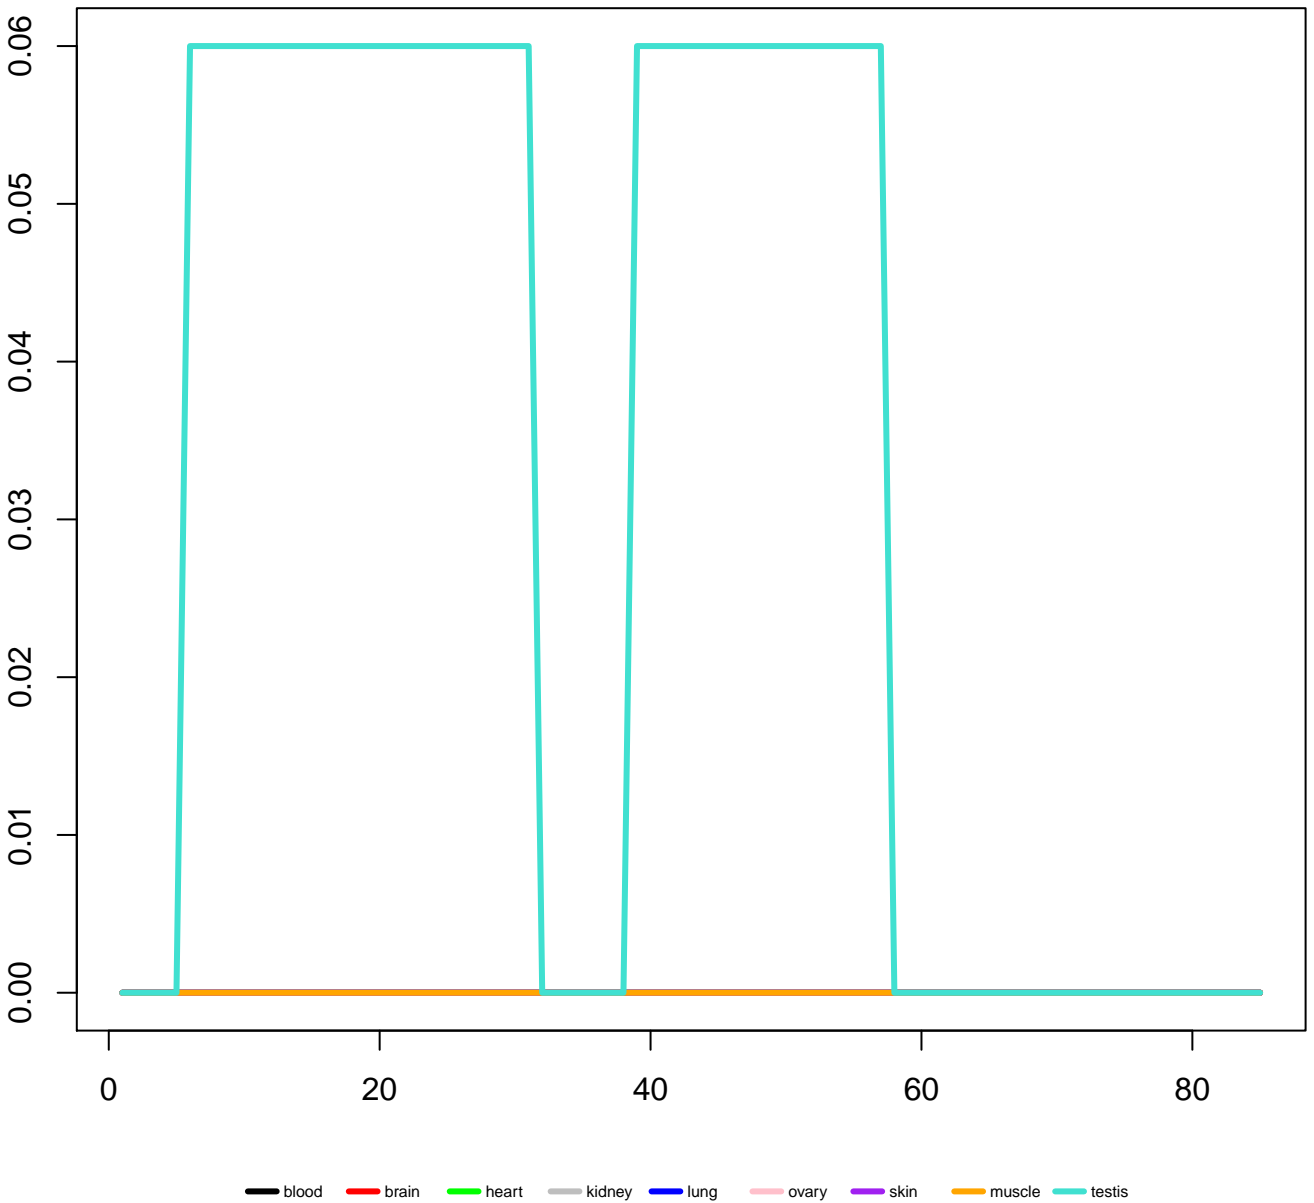



# 11\_14017421-14017515(-)\_cfa-mir-8830-1\_low

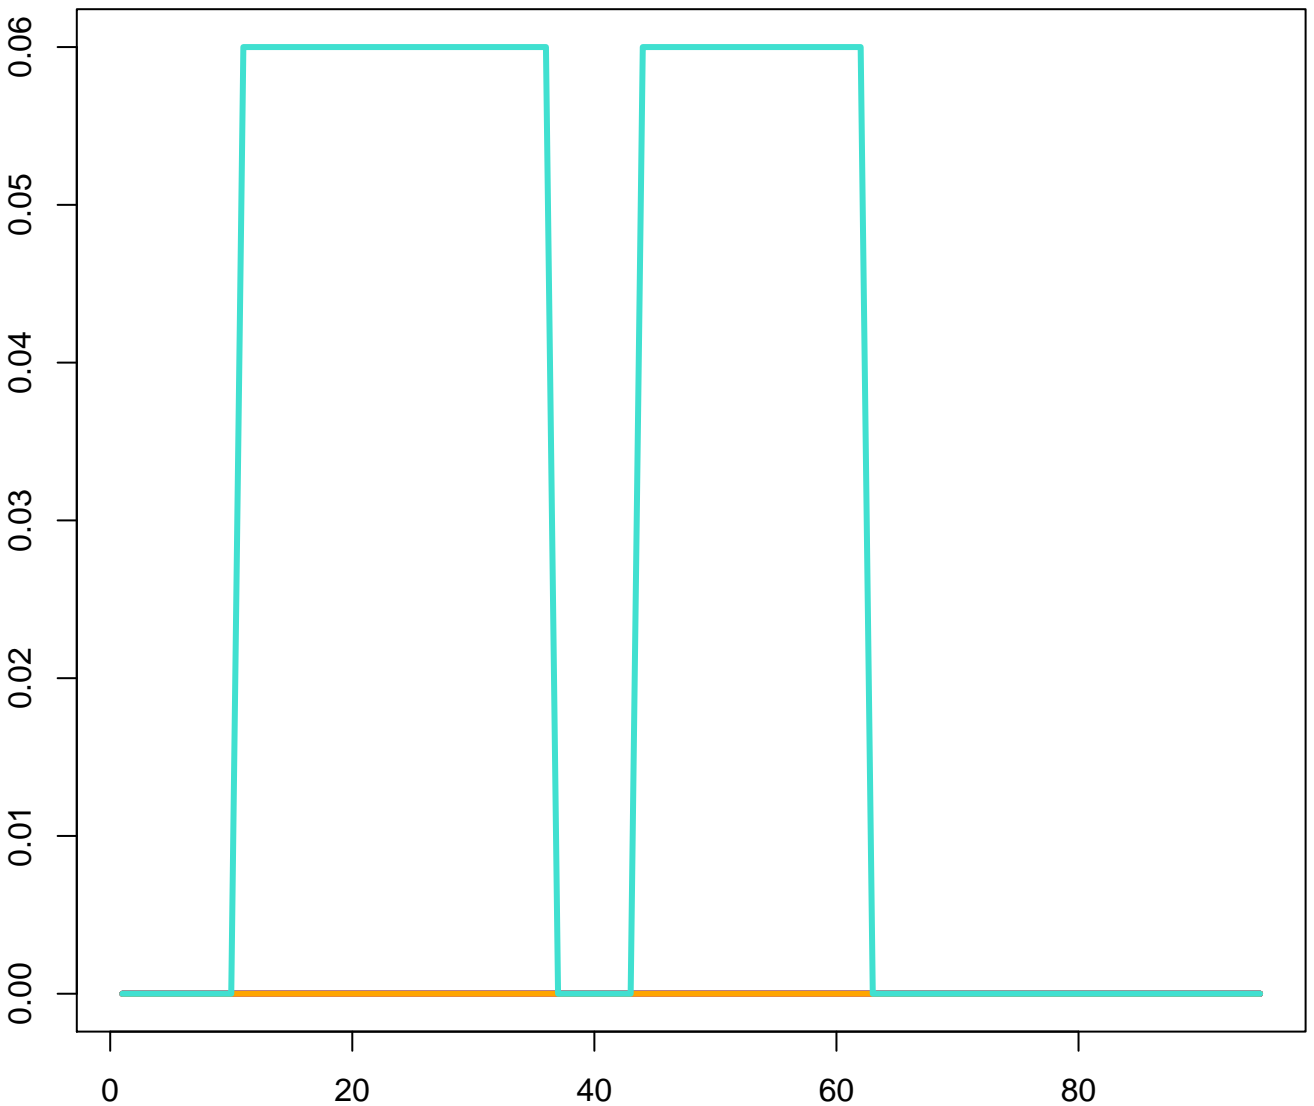

blood brain heart kidney lung ovary skin muscle testis

# 11\_14017612-14017756(-)\_cfa-mir-8830-3\_low

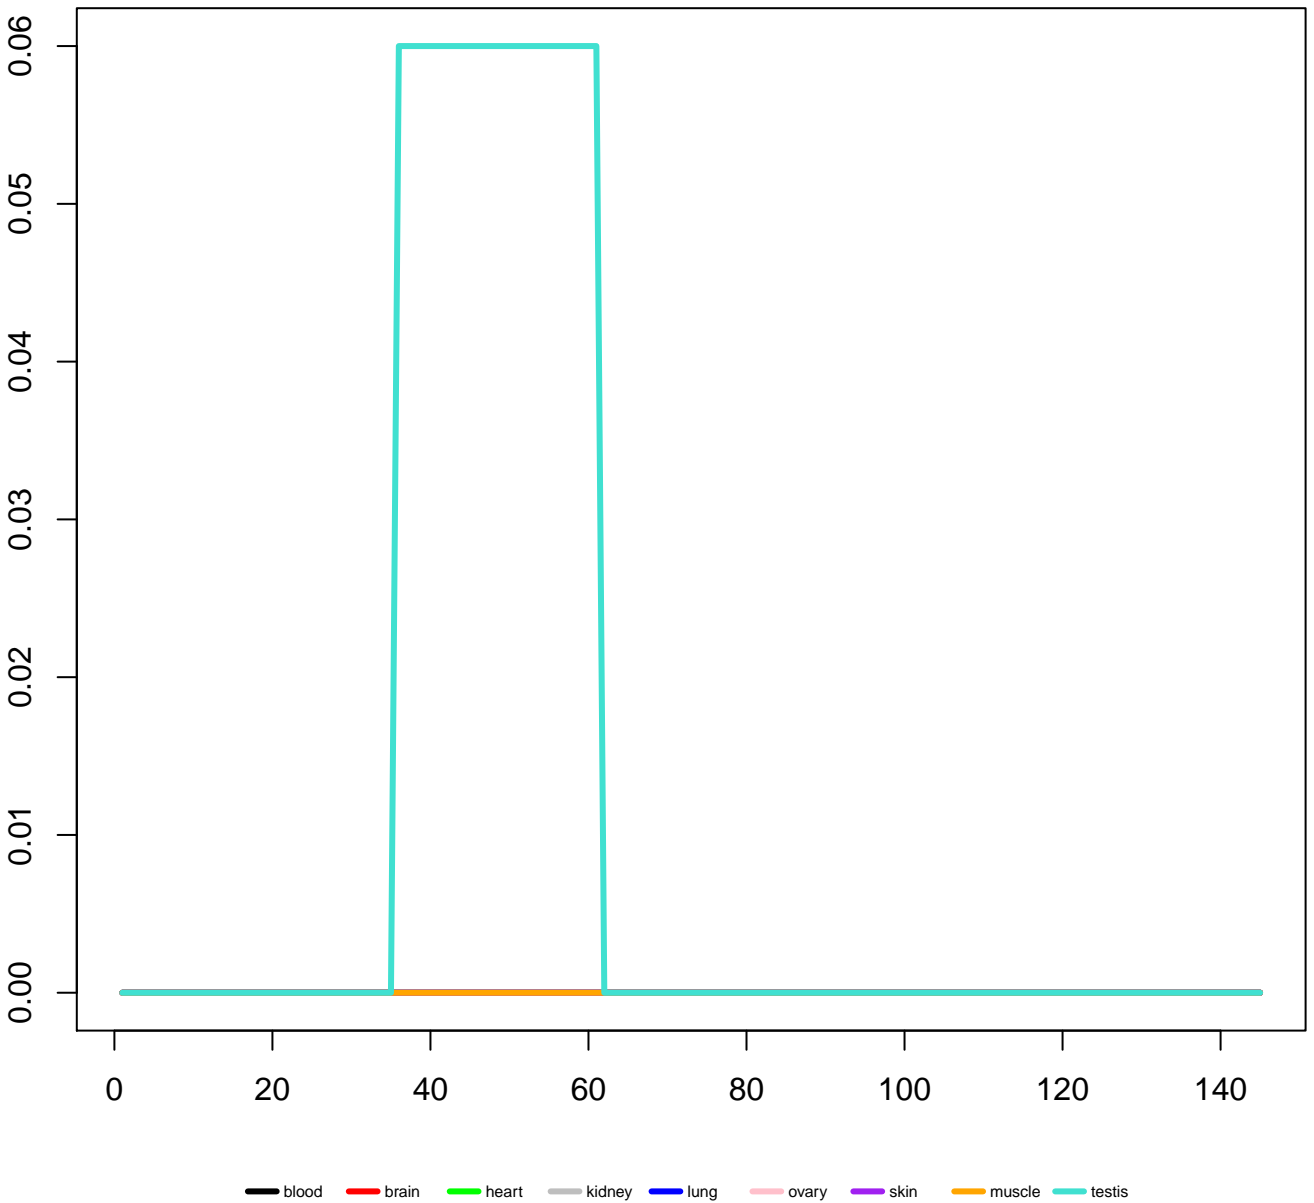



# 11\_26741534-26741600(+)\_miR-1543\_high

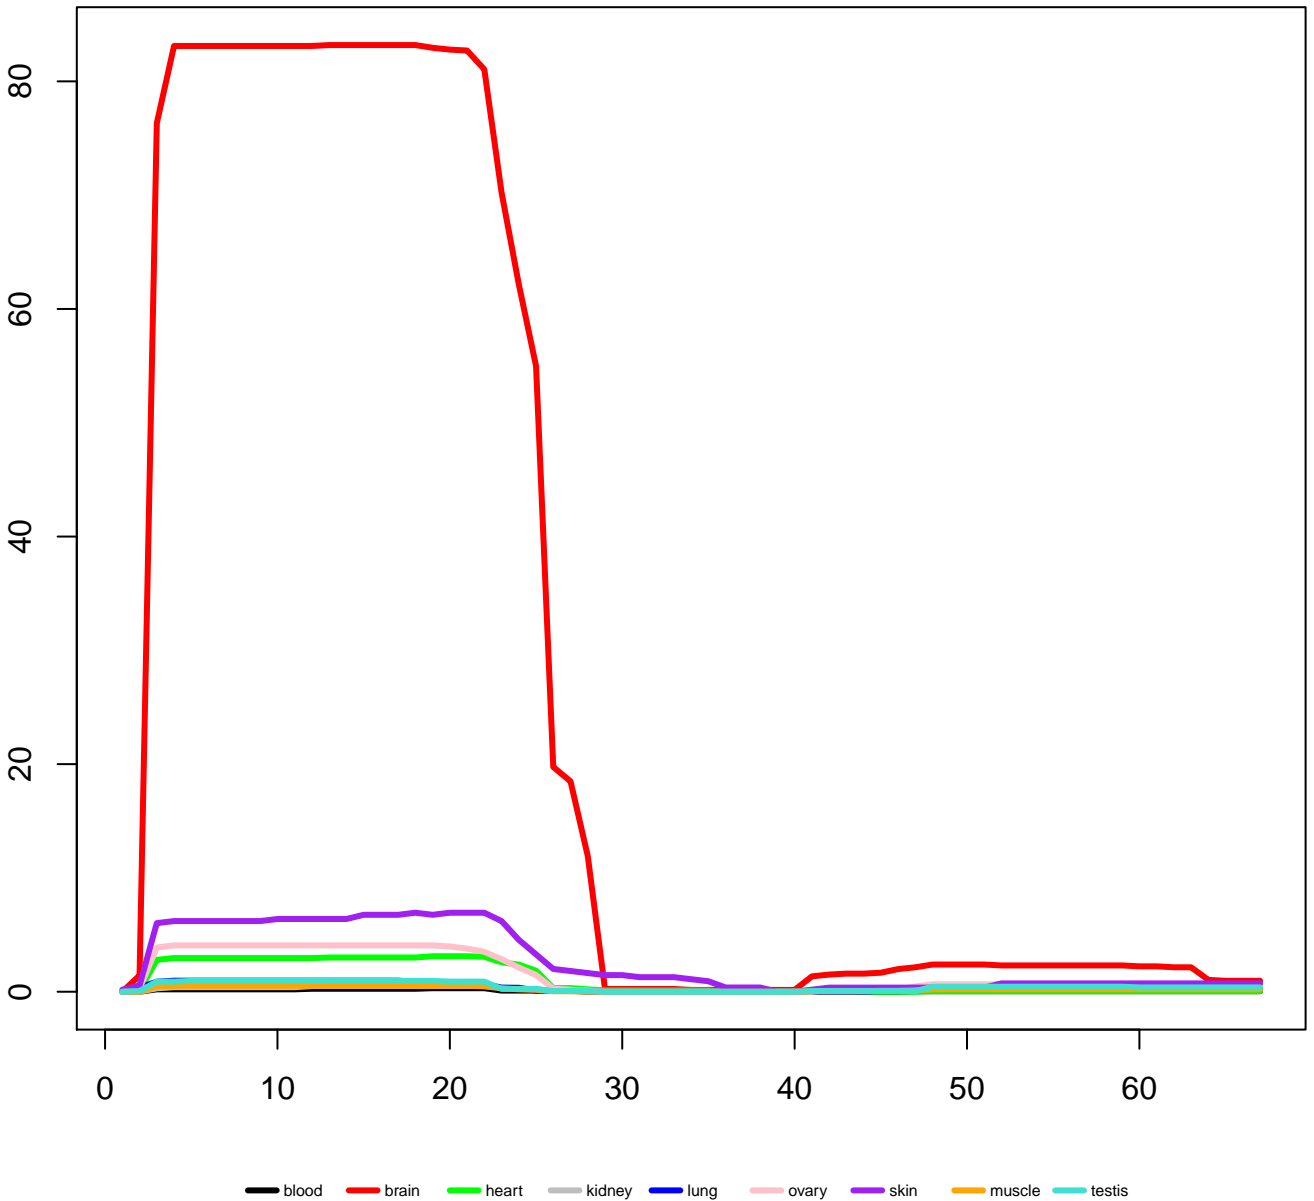

# 11\_28565345-28565421(-)\_mir-8953\_low

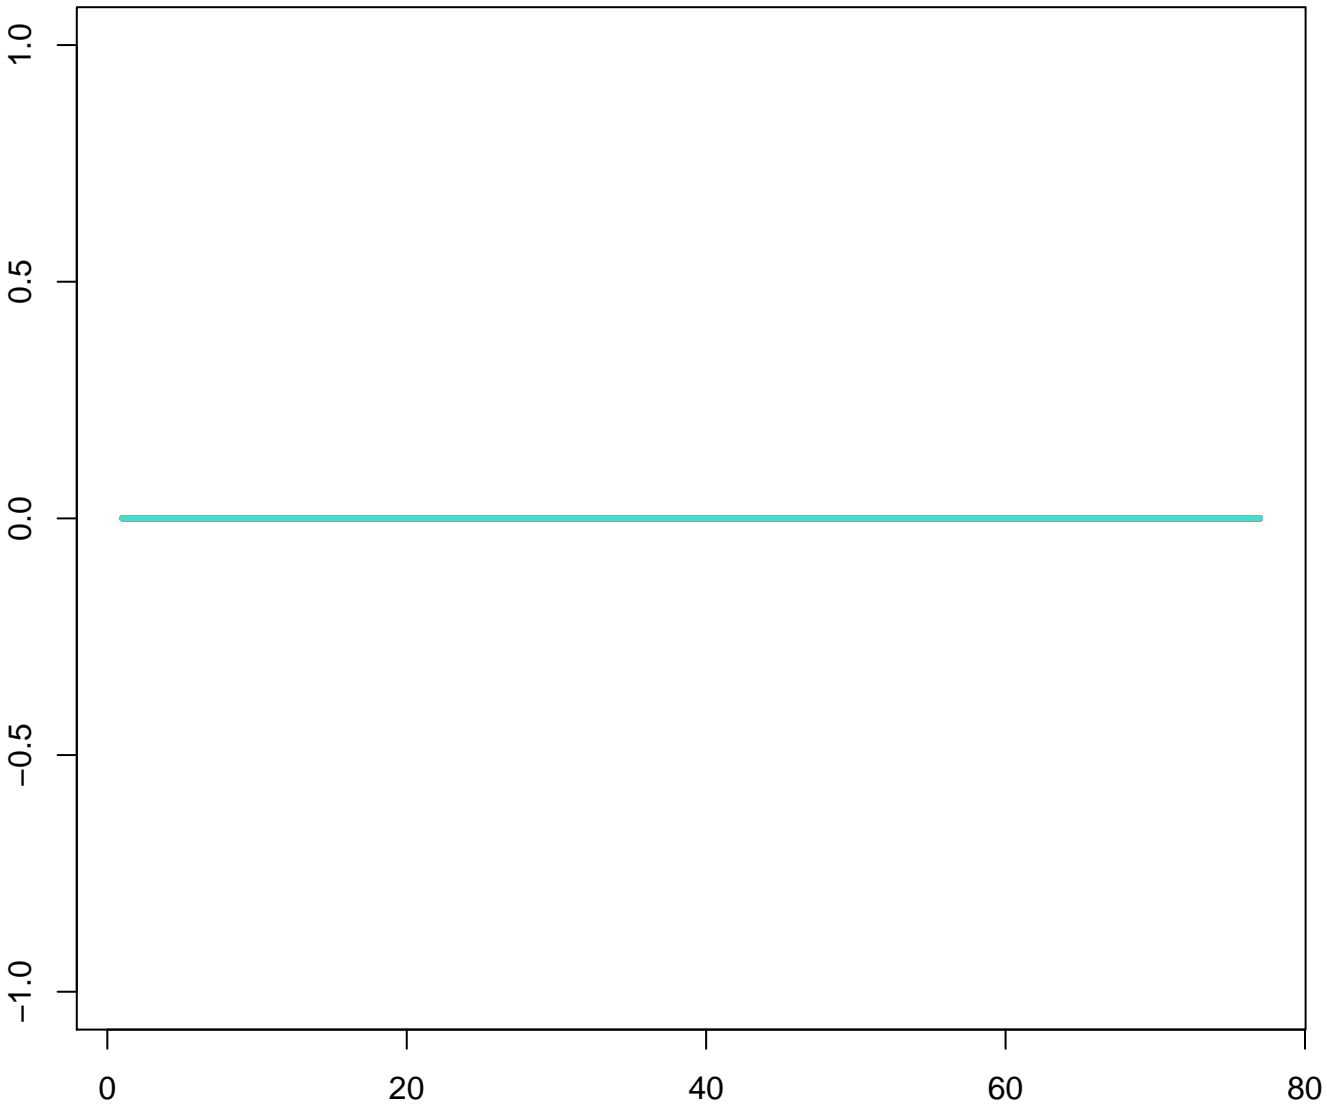

blood brain heart kidney lung ovary skin muscle testis



# 11\_40904438-40904496(-)\_cfa-mir-31\_high

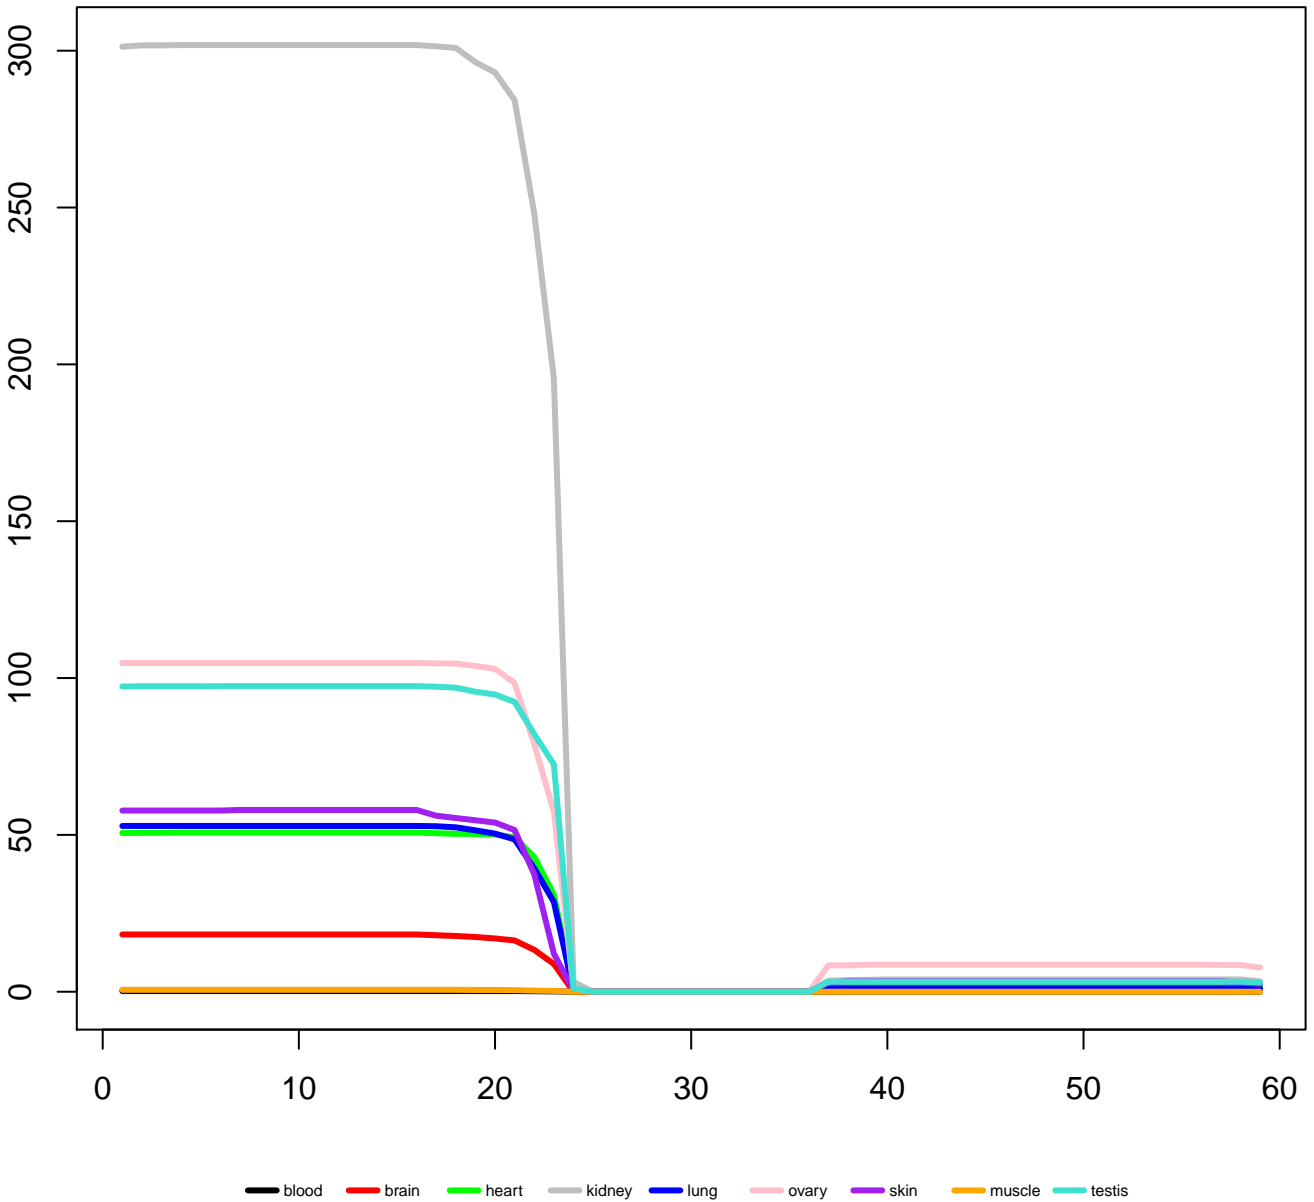

# 11\_44895300-44895444(+)\_cfa-mir-8831\_low

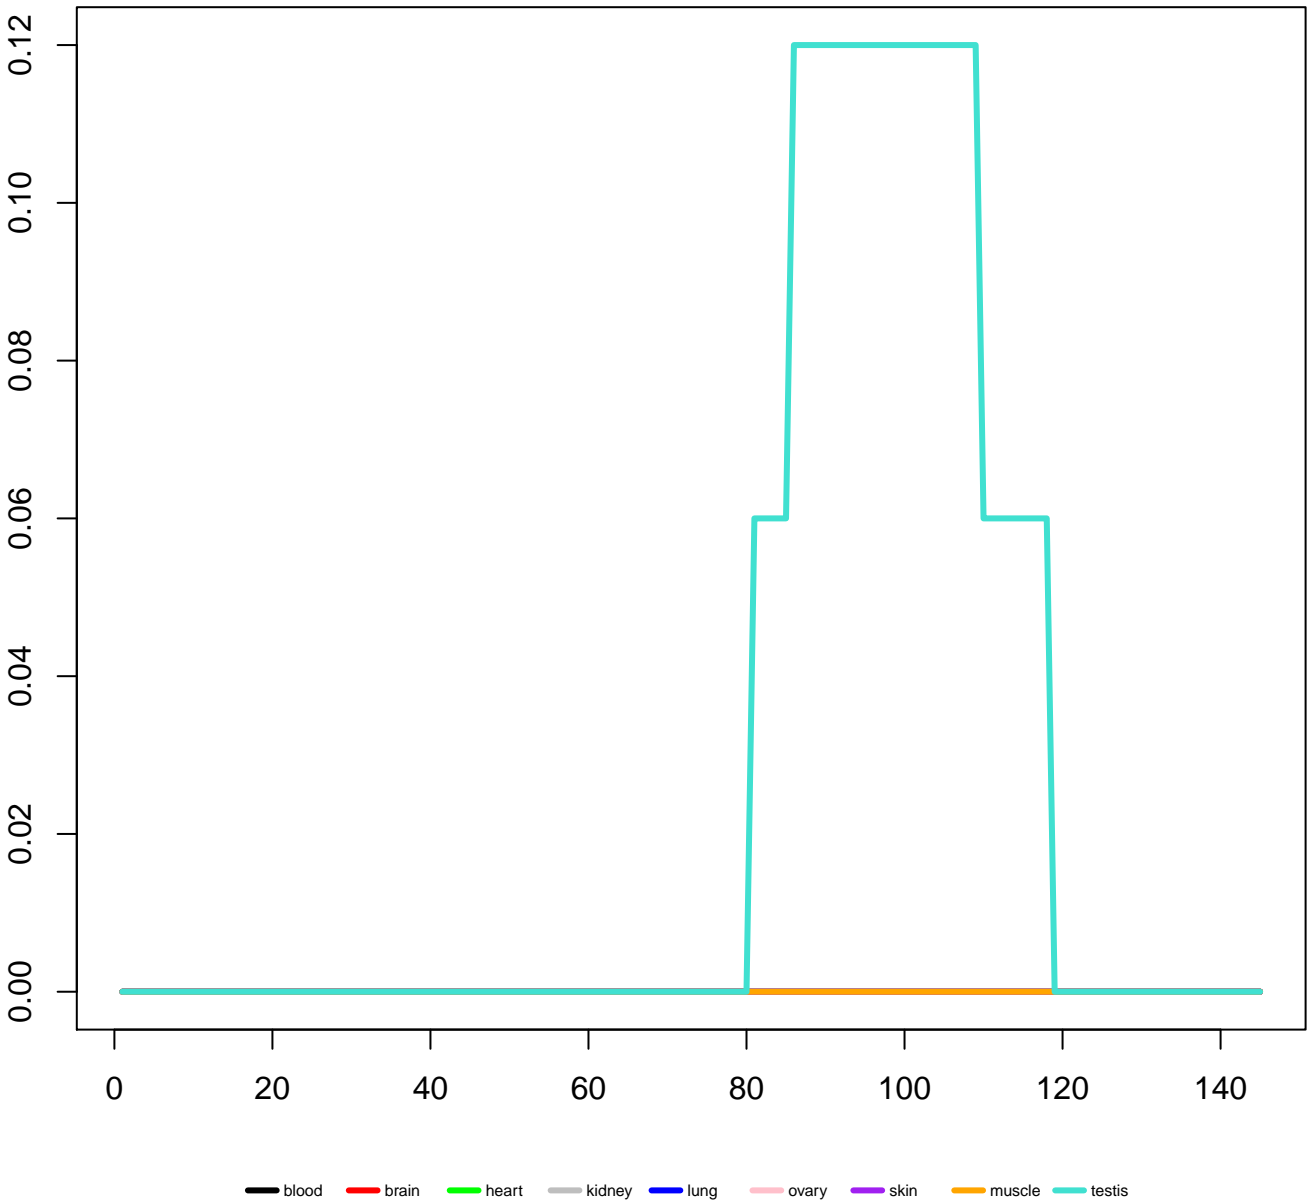



# 11\_45208764-45208836(+)\_cfa-mir-872\_low

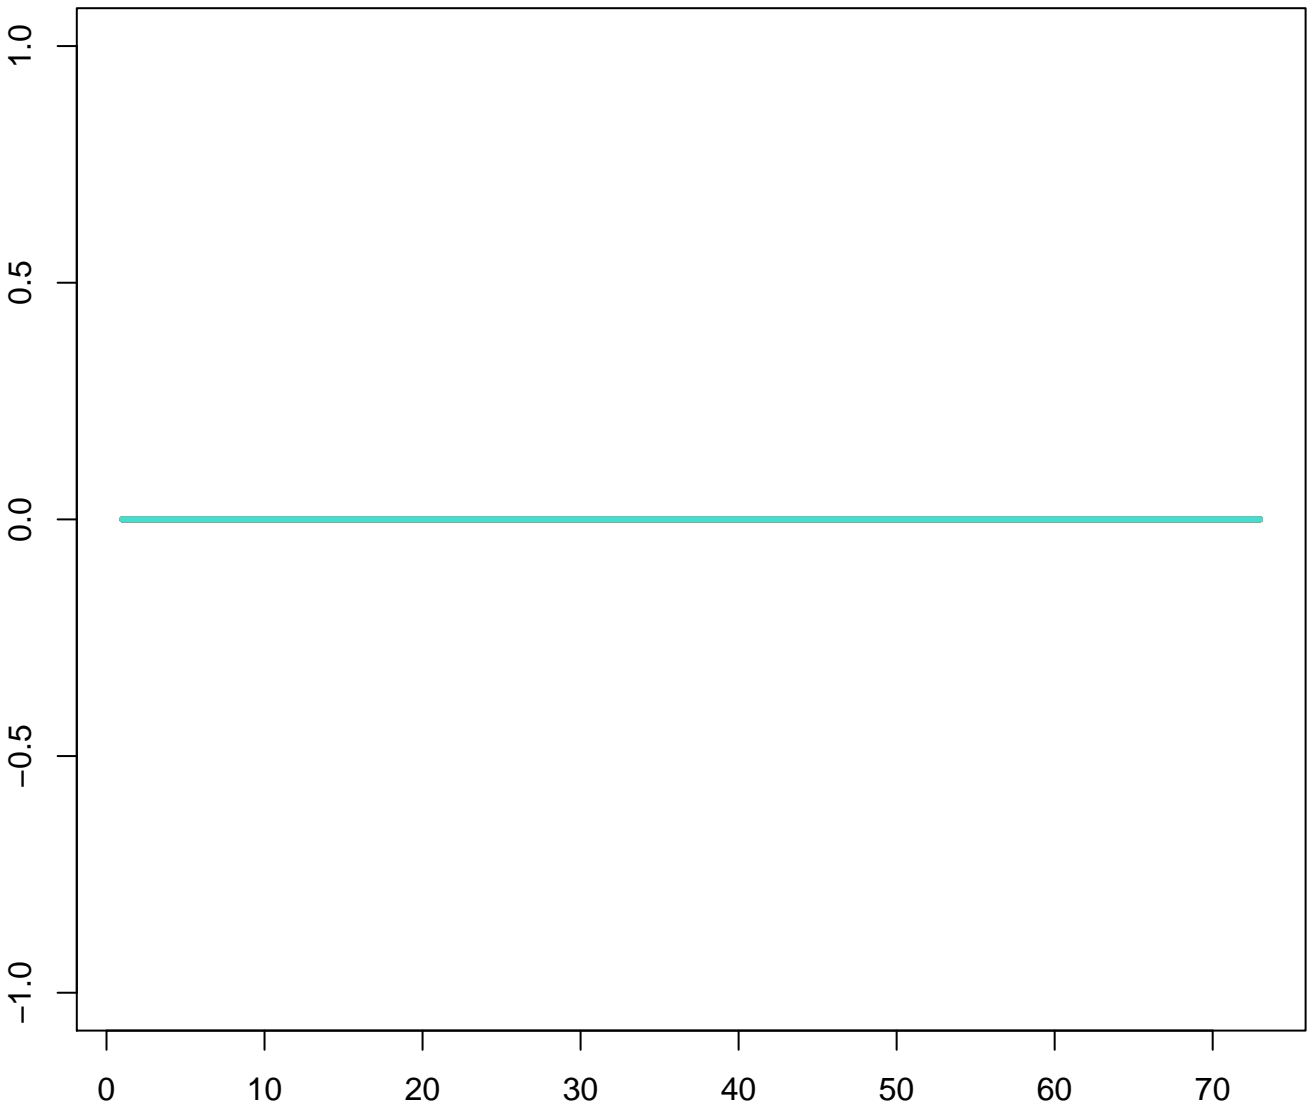

blood brain heart kidney lung ovary skin muscle testis

# 11\_46819464-46819544(-)\_cfa-mir-876\_high

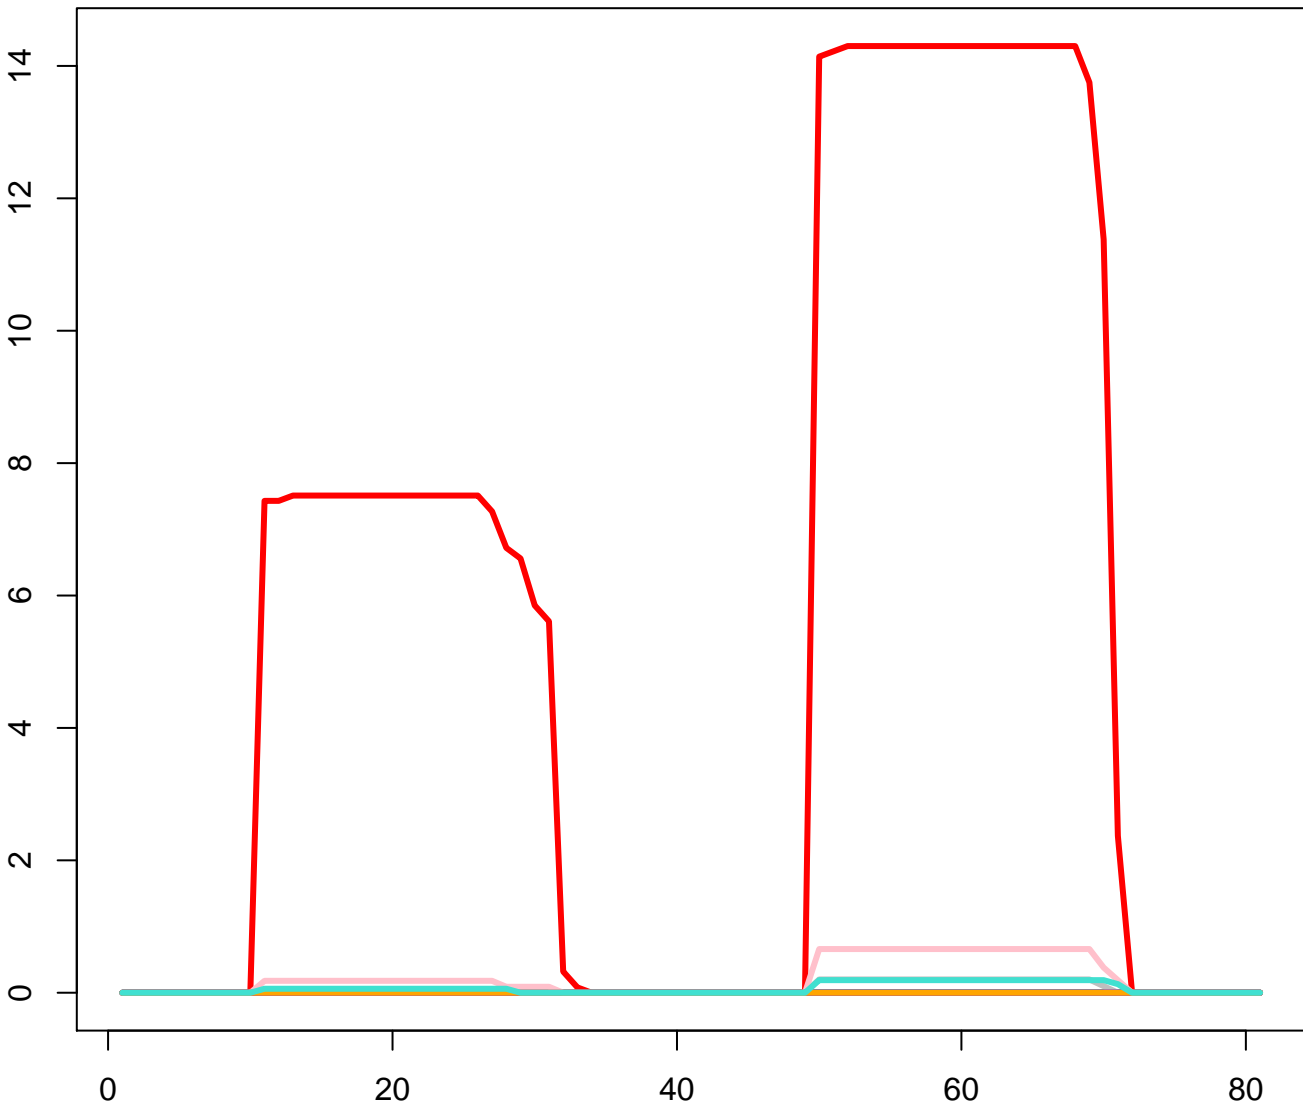

— blood — brain — heart — kidney — lung — ovary — skin — muscle — testis



# 11\_50156577-50156645(+)\_cfa-mir-207\_low

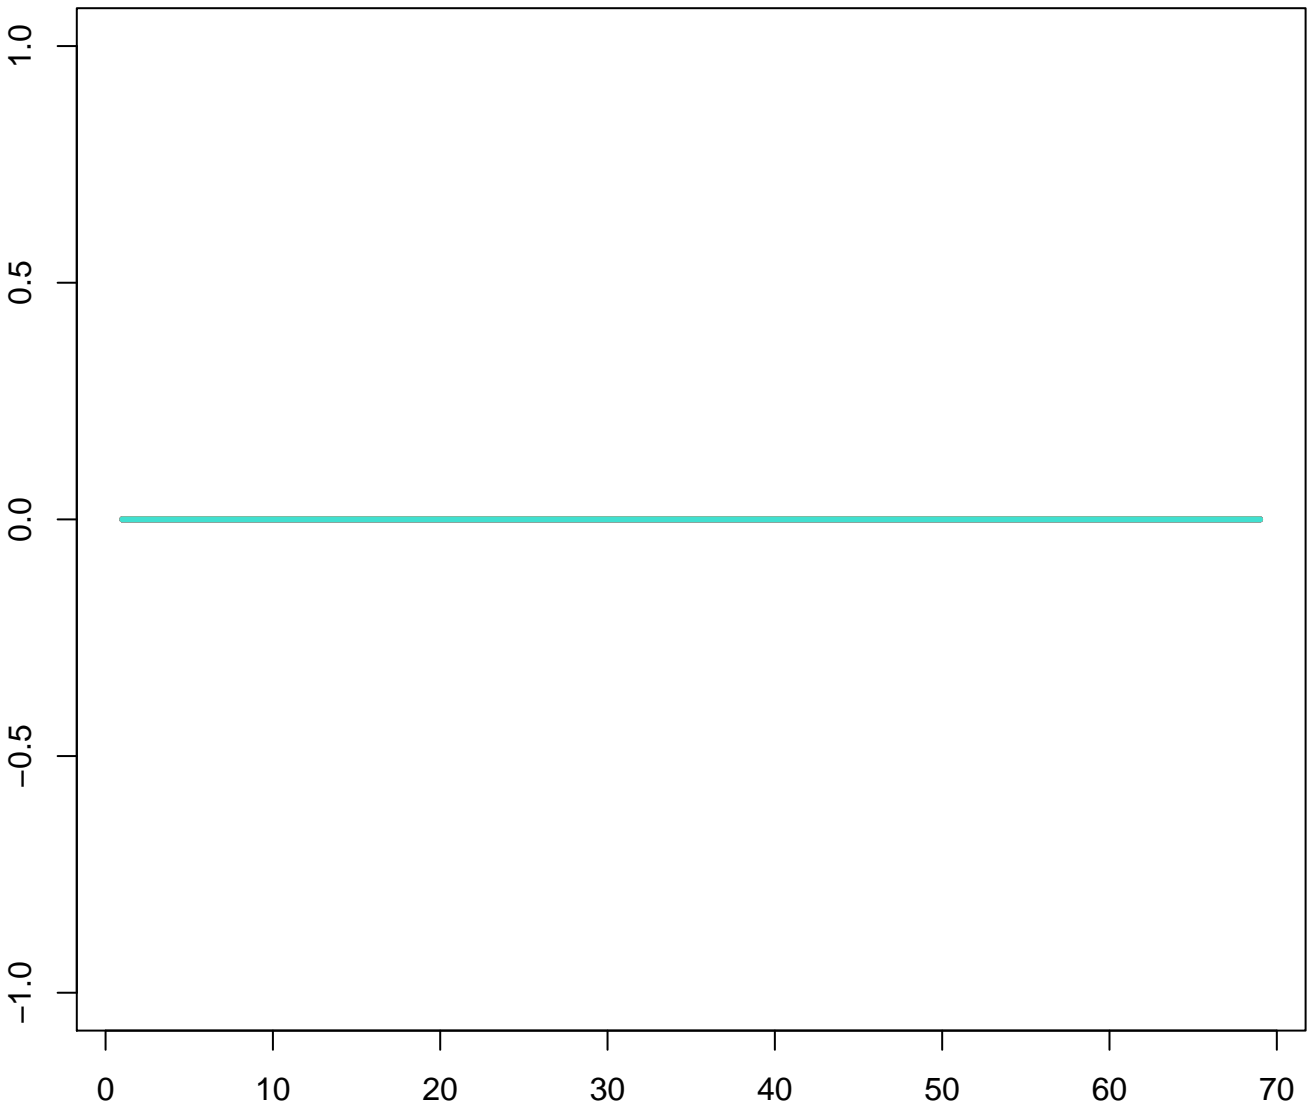

blood brain heart kidney lung ovary skin muscle testis



# 11\_68461911-68461968(+)\_cfa-mir-455\_high

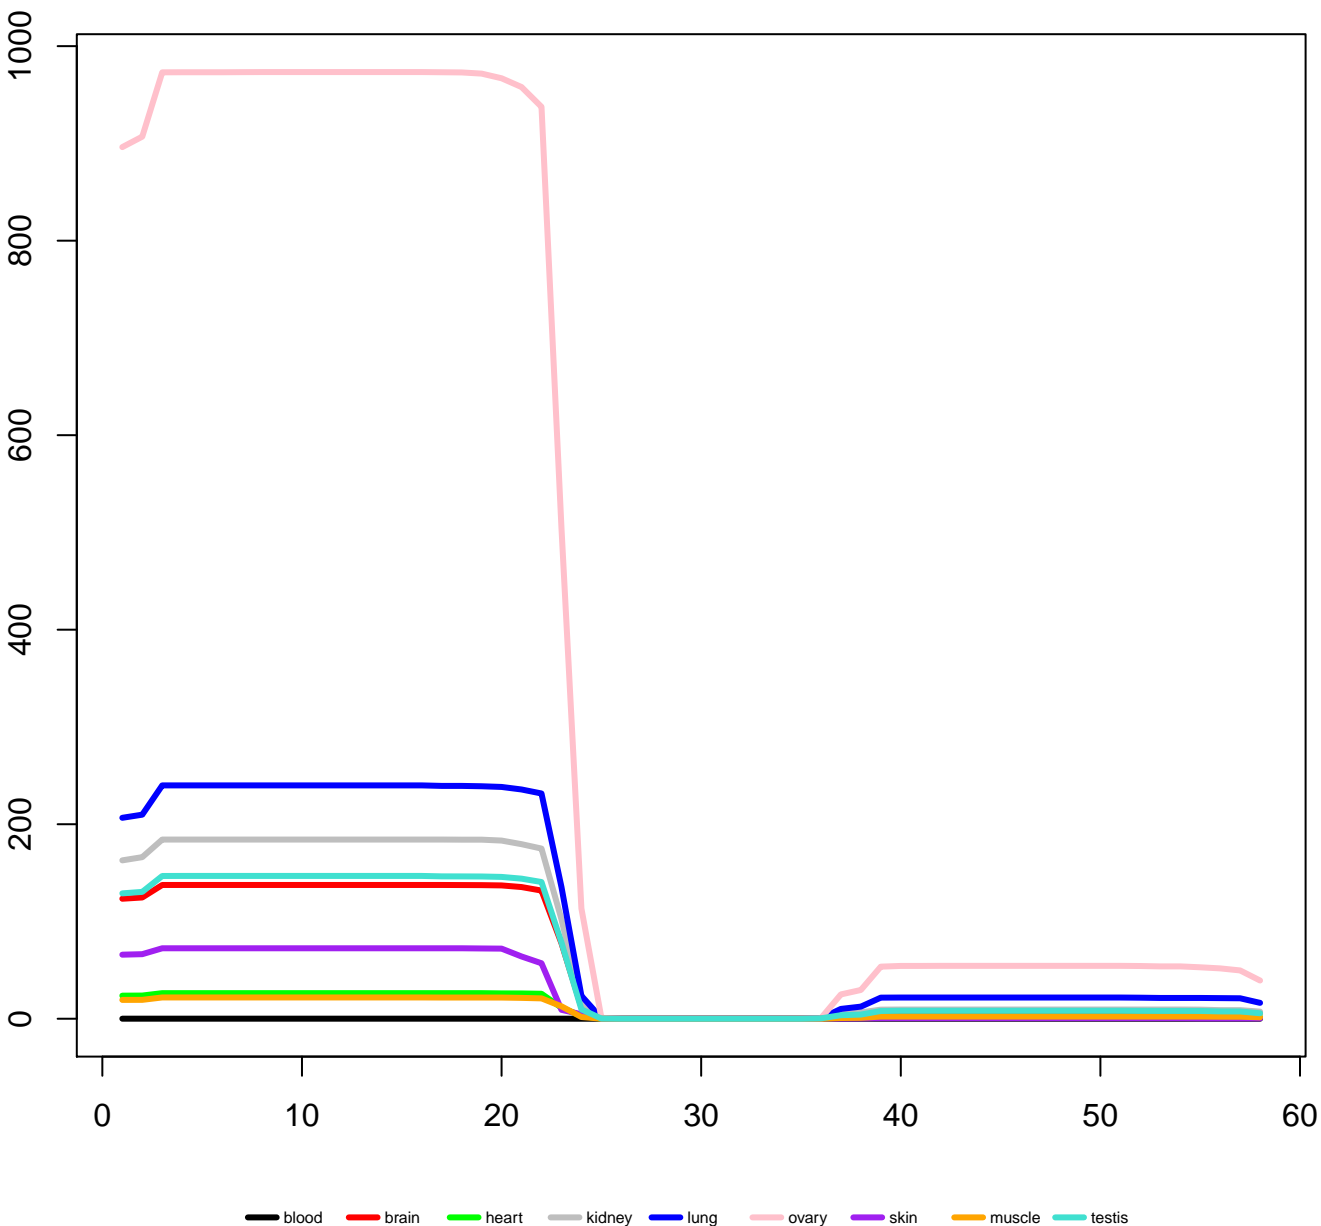

# 12\_406899-406968(+)\_mir-877\_high

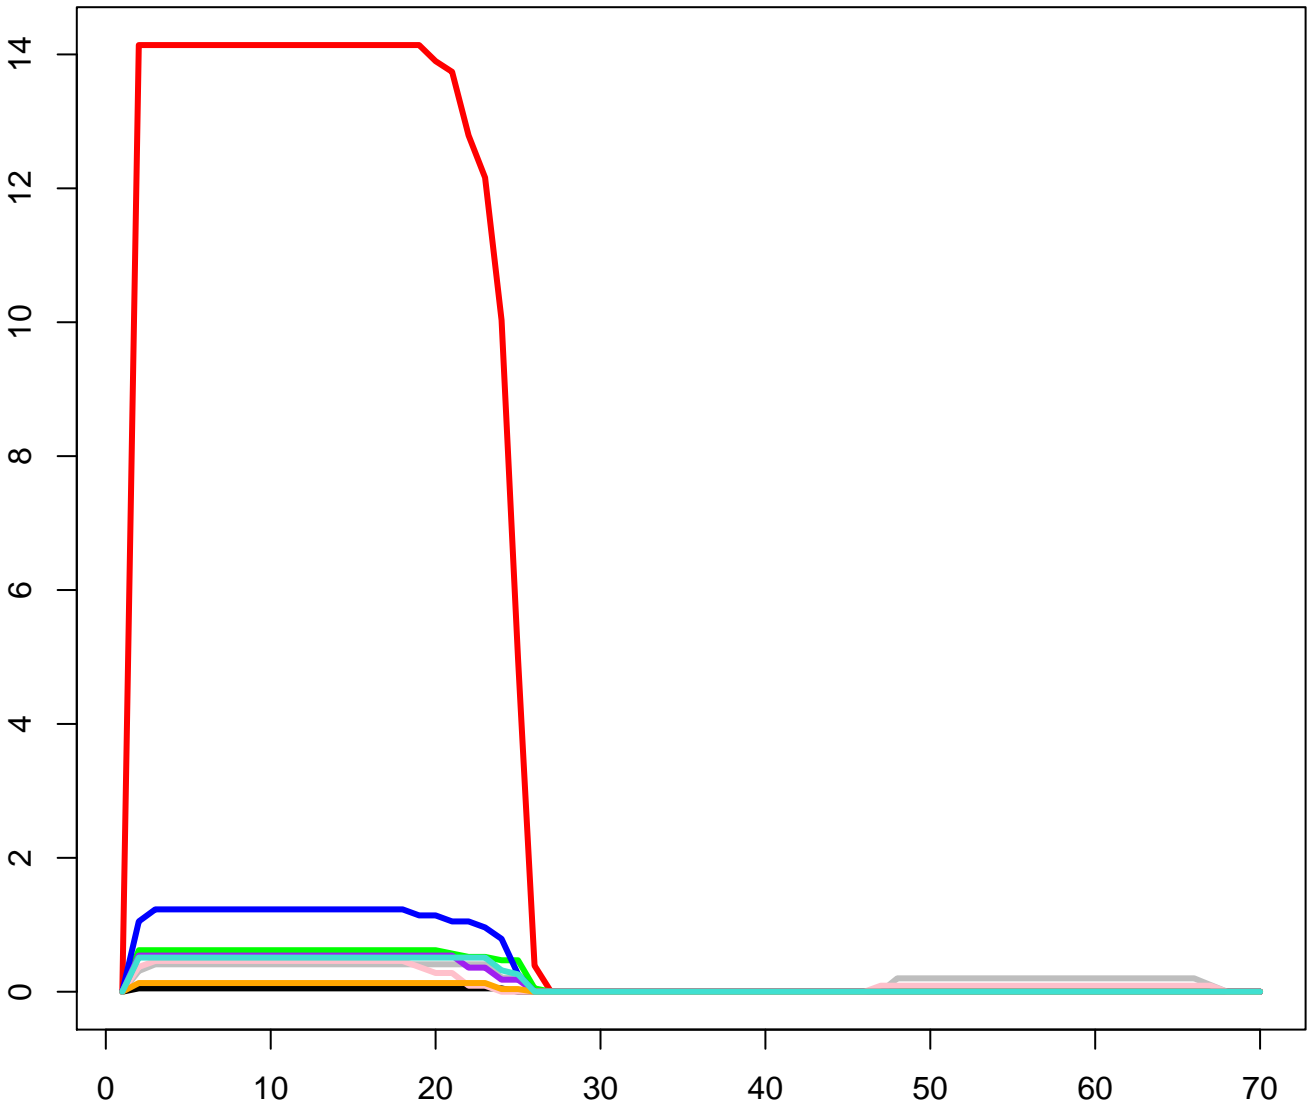

— blood — brain — heart — kidney — lung — ovary — skin — muscle — testis

# 12\_1034339-1034413(-)\_mir-8094\_low

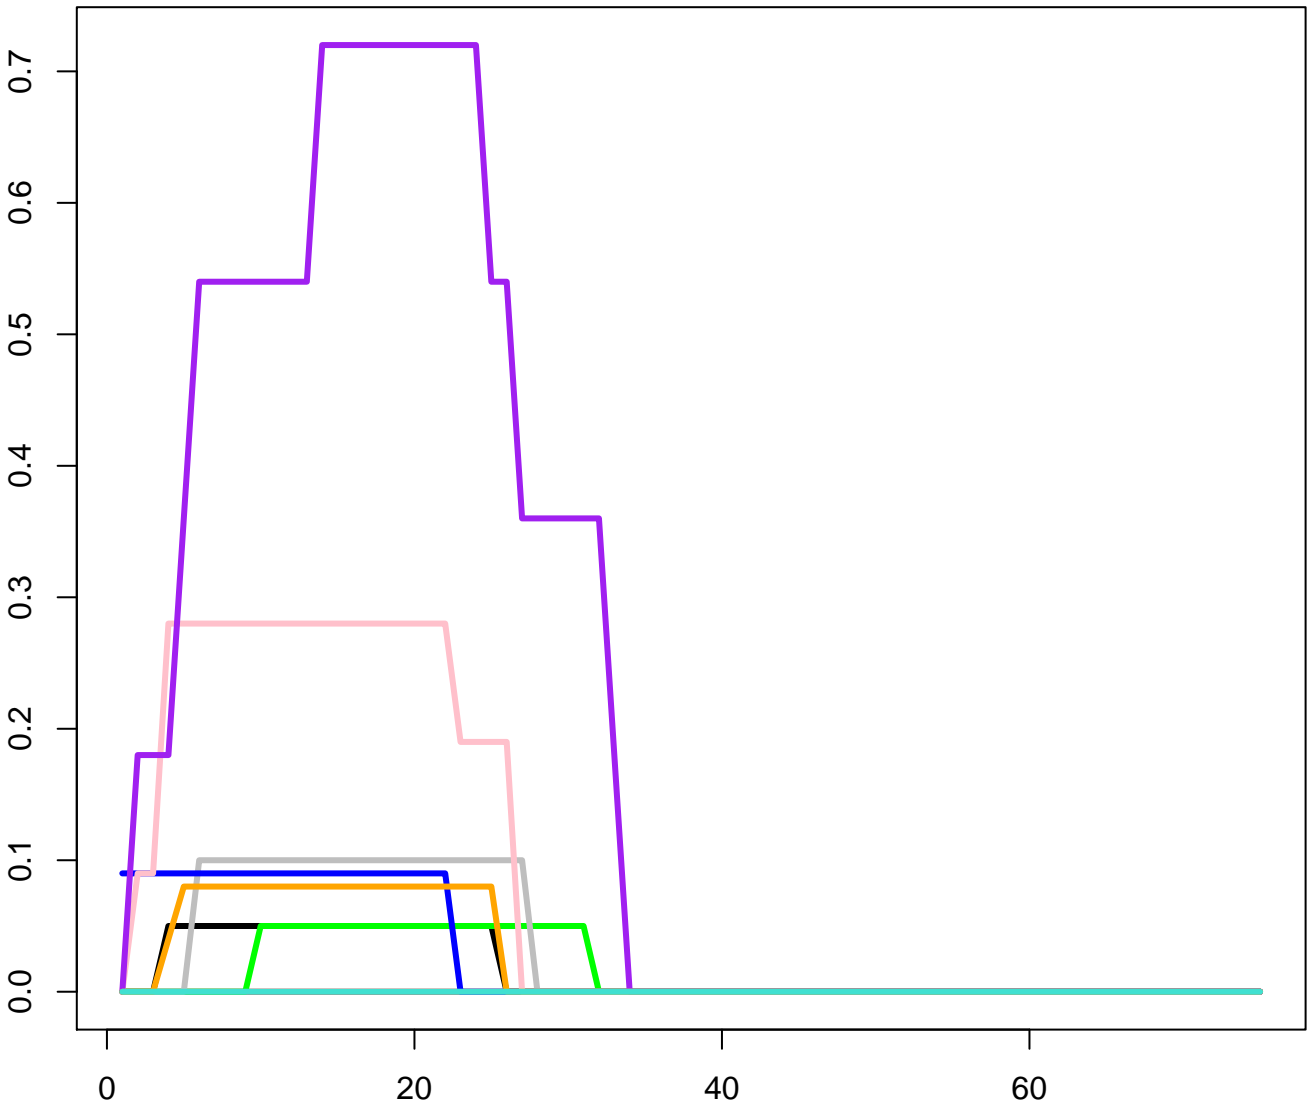

— blood — brain — heart — kidney — lung — ovary — skin — muscle — testis



# 12\_2670928-2670990(+)\_cfa-mir-219-1\_high

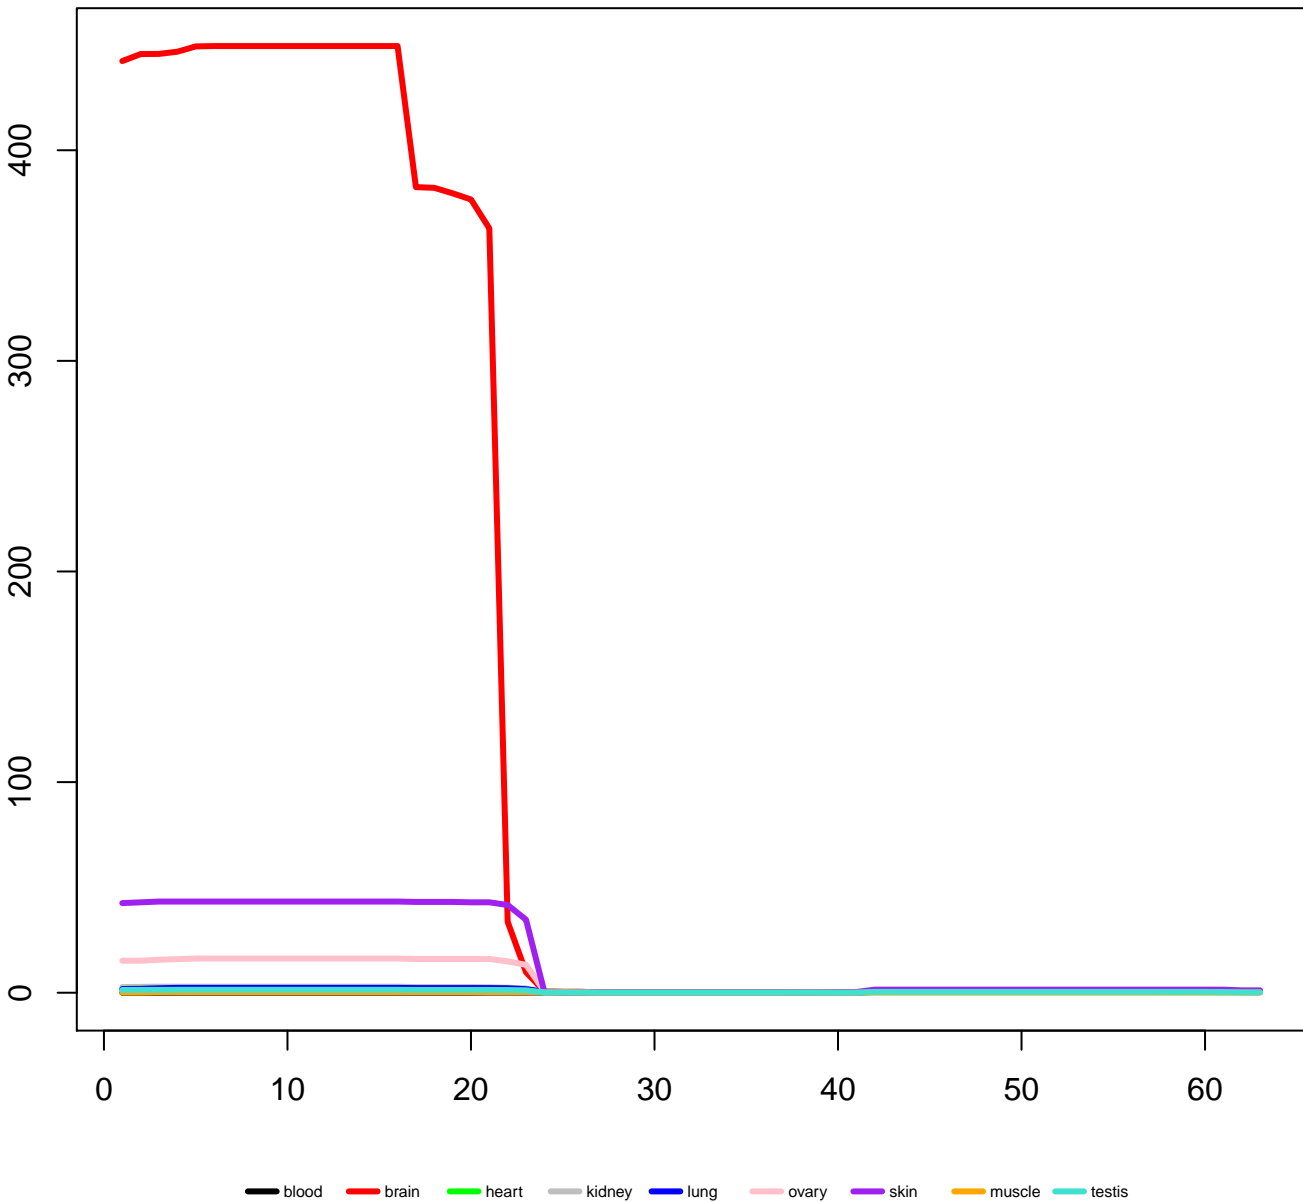

# 12\_3200669-3200813(-)\_cfa-mir-8832\_low

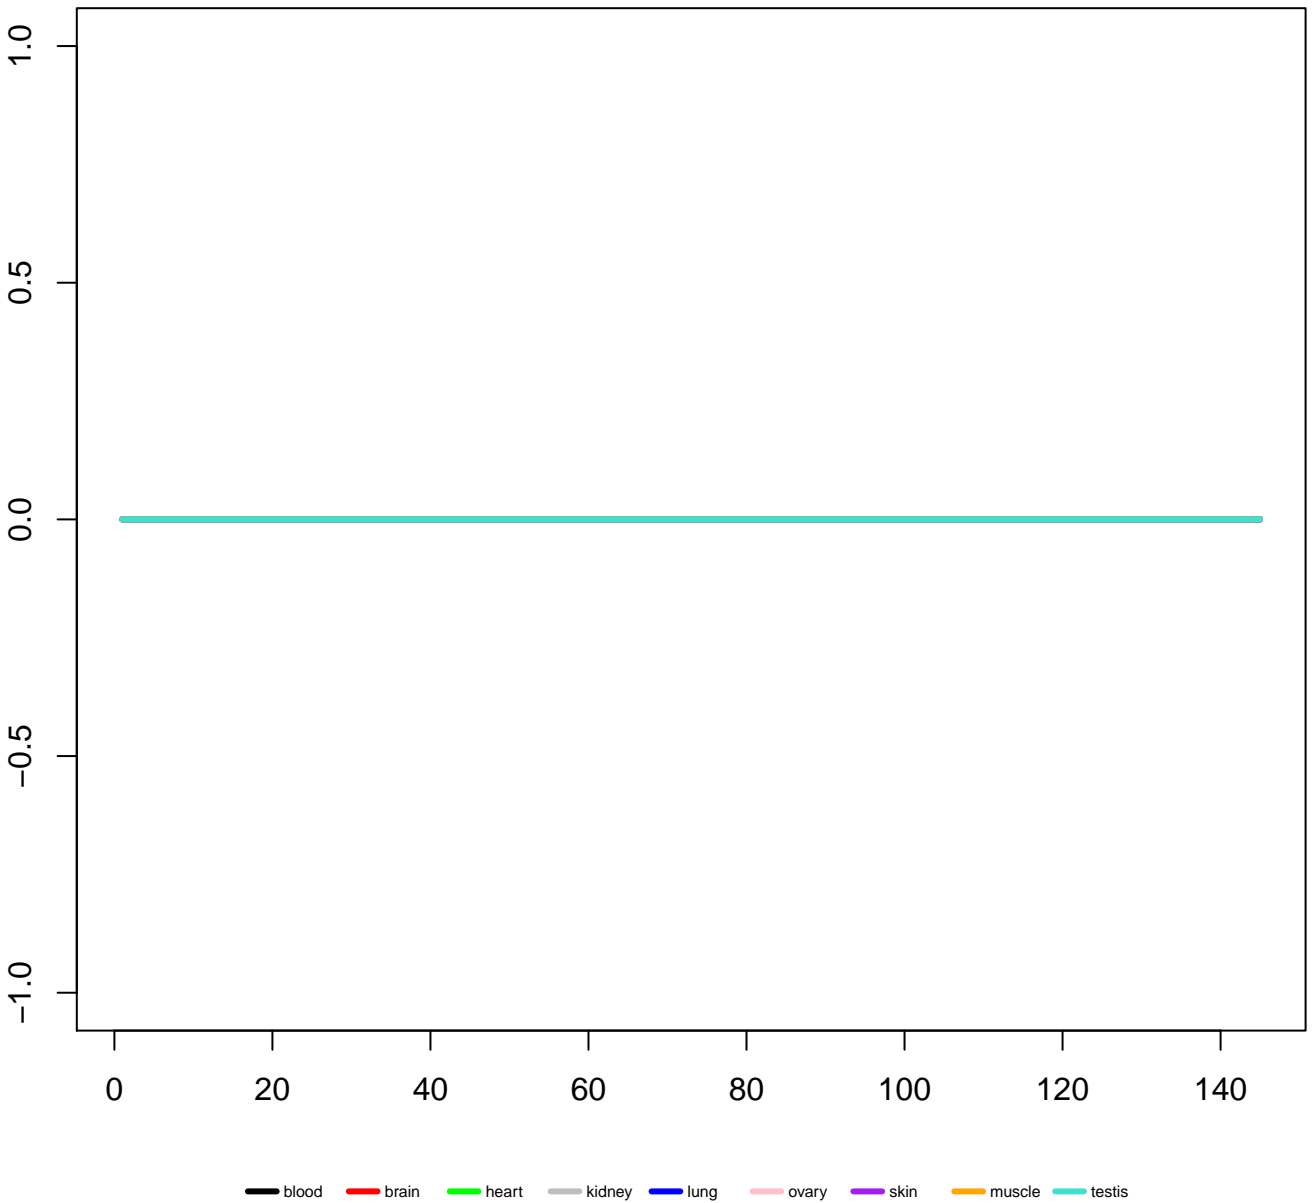

# 12\_19805523-19805582(+)\_cfa-mir-206\_high

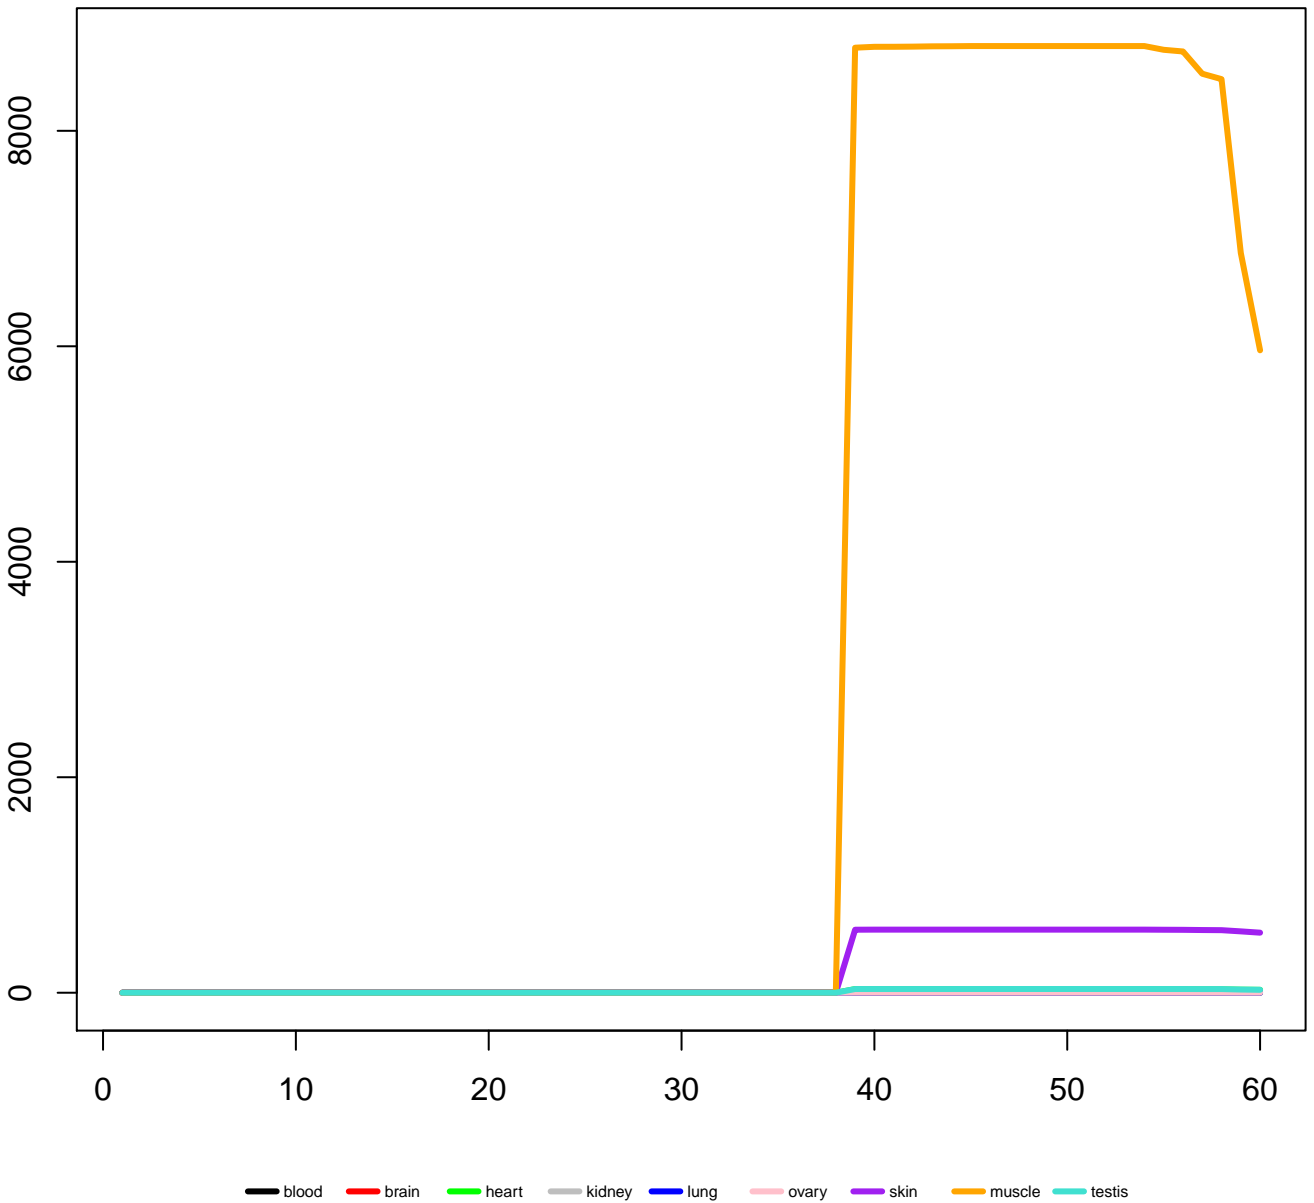

# 12\_33757899-33757960(-)\_cfa-mir-30c-2\_high

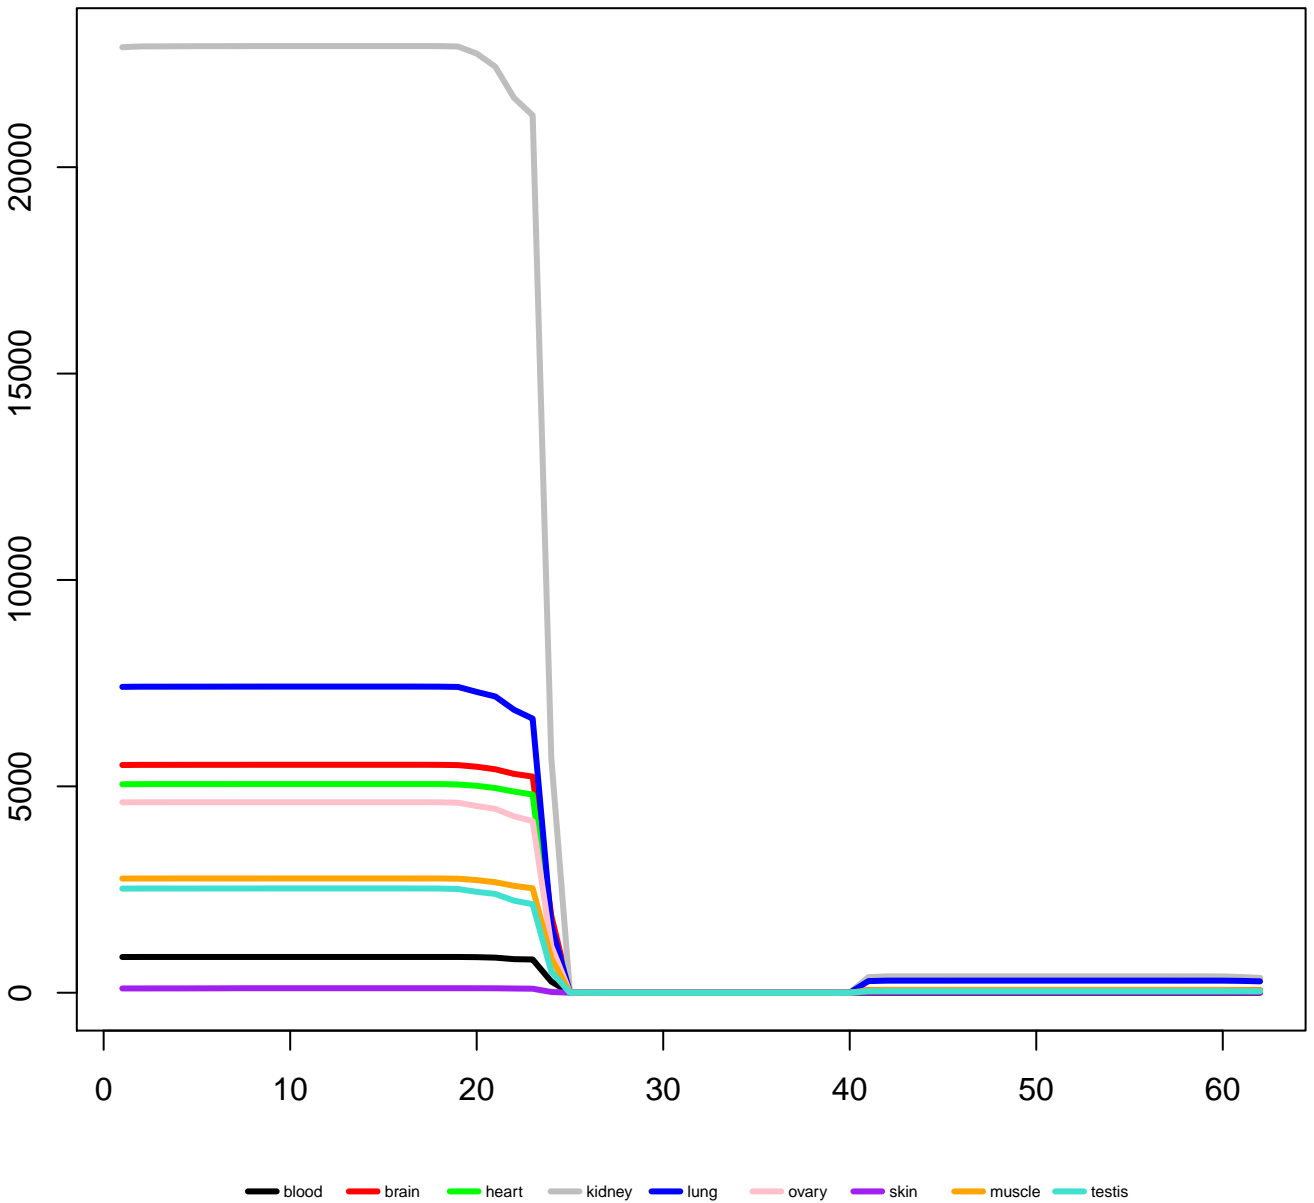

# 12\_33783894-33783956(-)\_cfa-mir-30a\_high

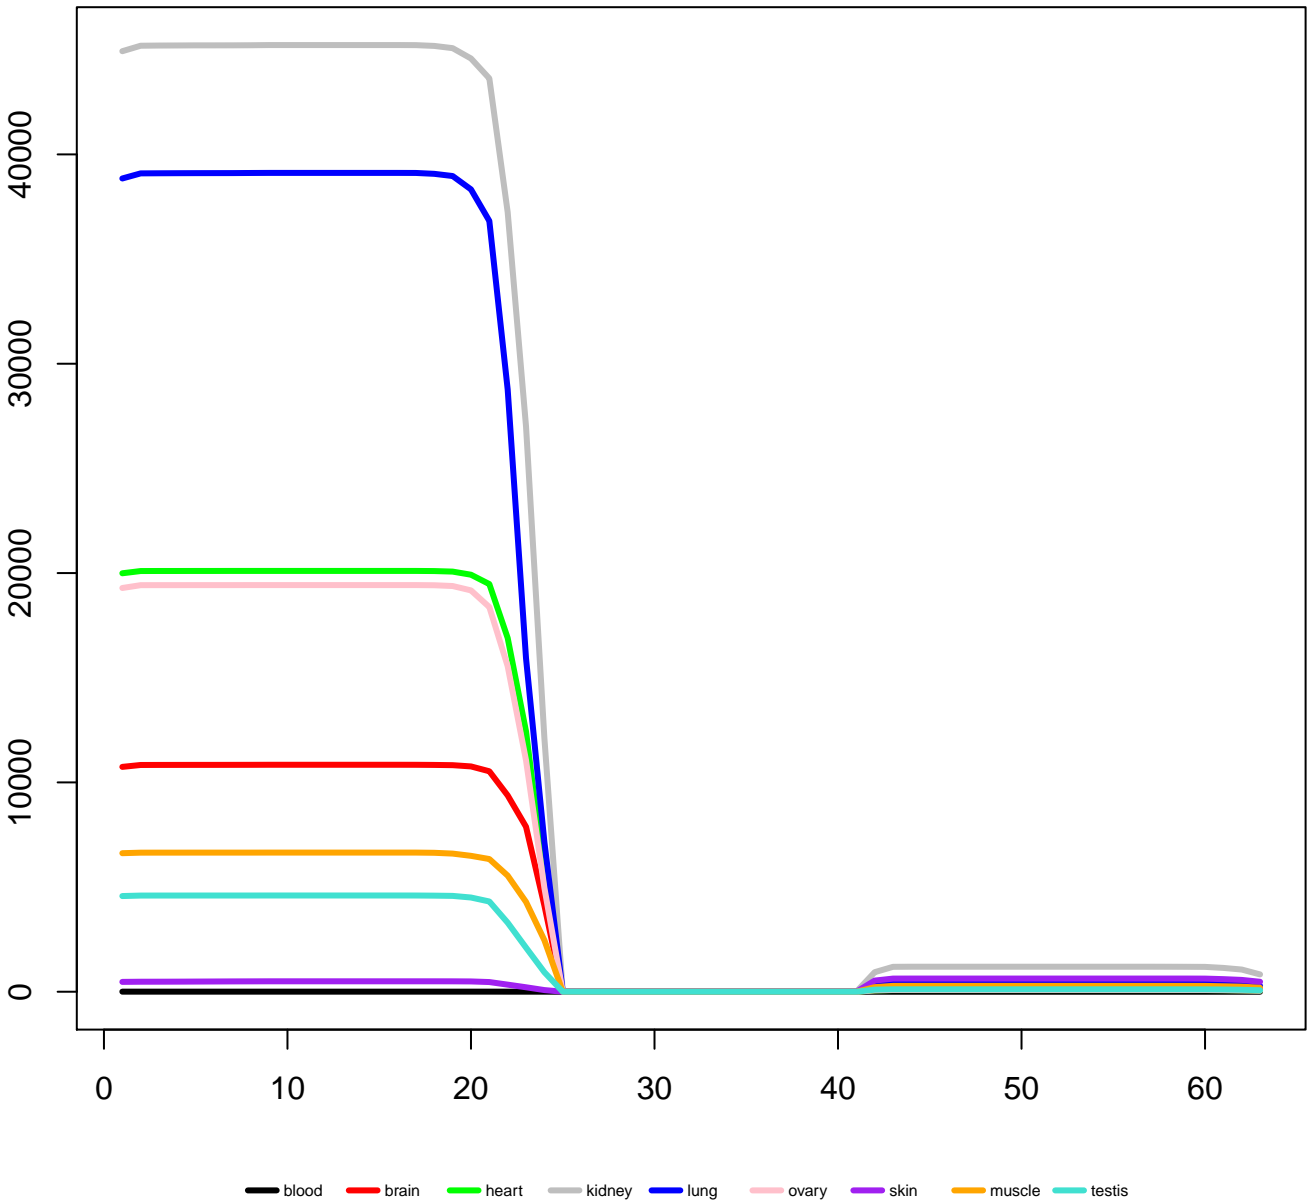

# 12\_36887516-36887658(-)\_cfa-mir-8835\_low

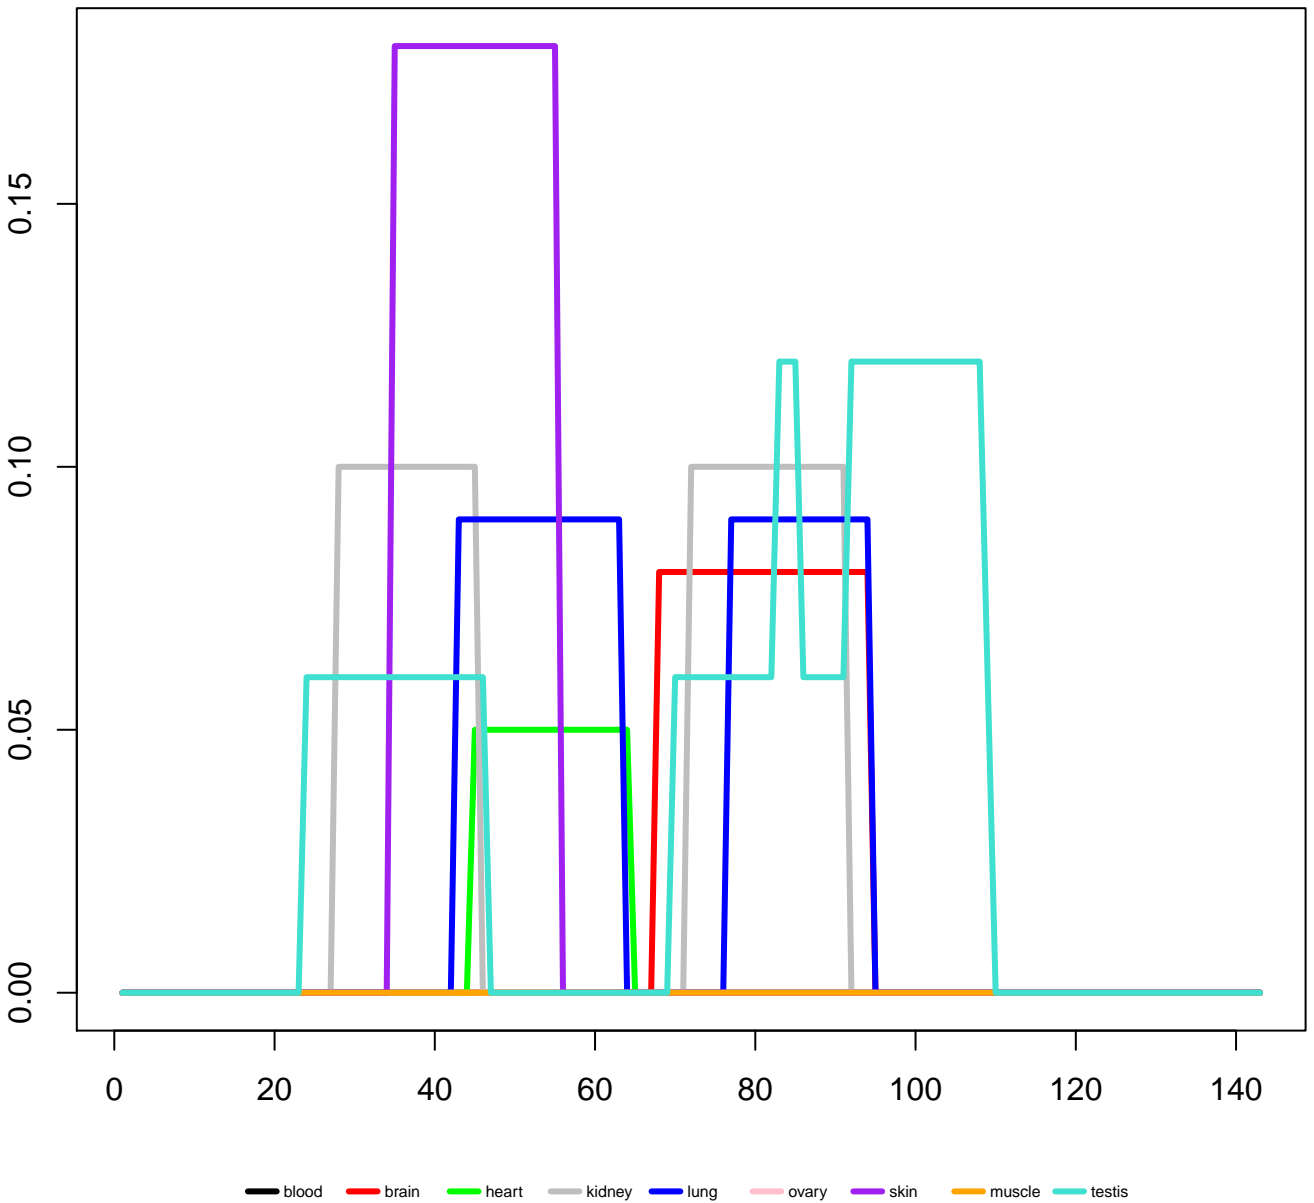

# 12\_40720025-40720165(+)\_cfa-mir-8834a-1\_low

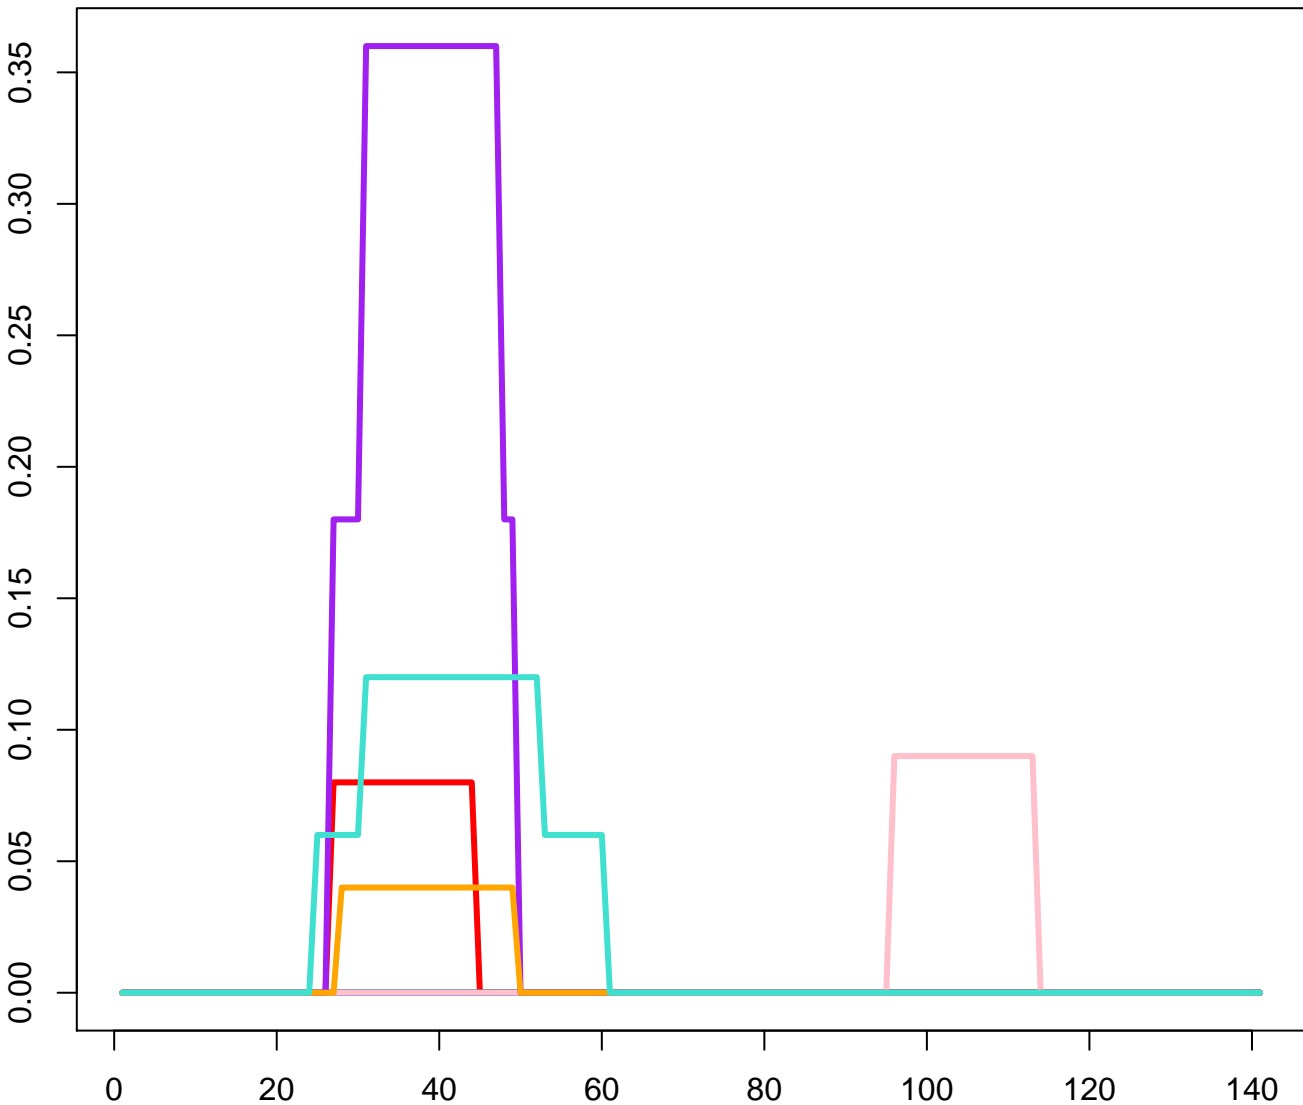

blood brain heart kidney lung ovary skin muscle testis

# 12\_48210886-48210958(-)\_mir-544\_low



blood brain heart kidney lung ovary skin muscle testis



# 12\_48374871-48375009(+)\_cfa-mir-8833\_low

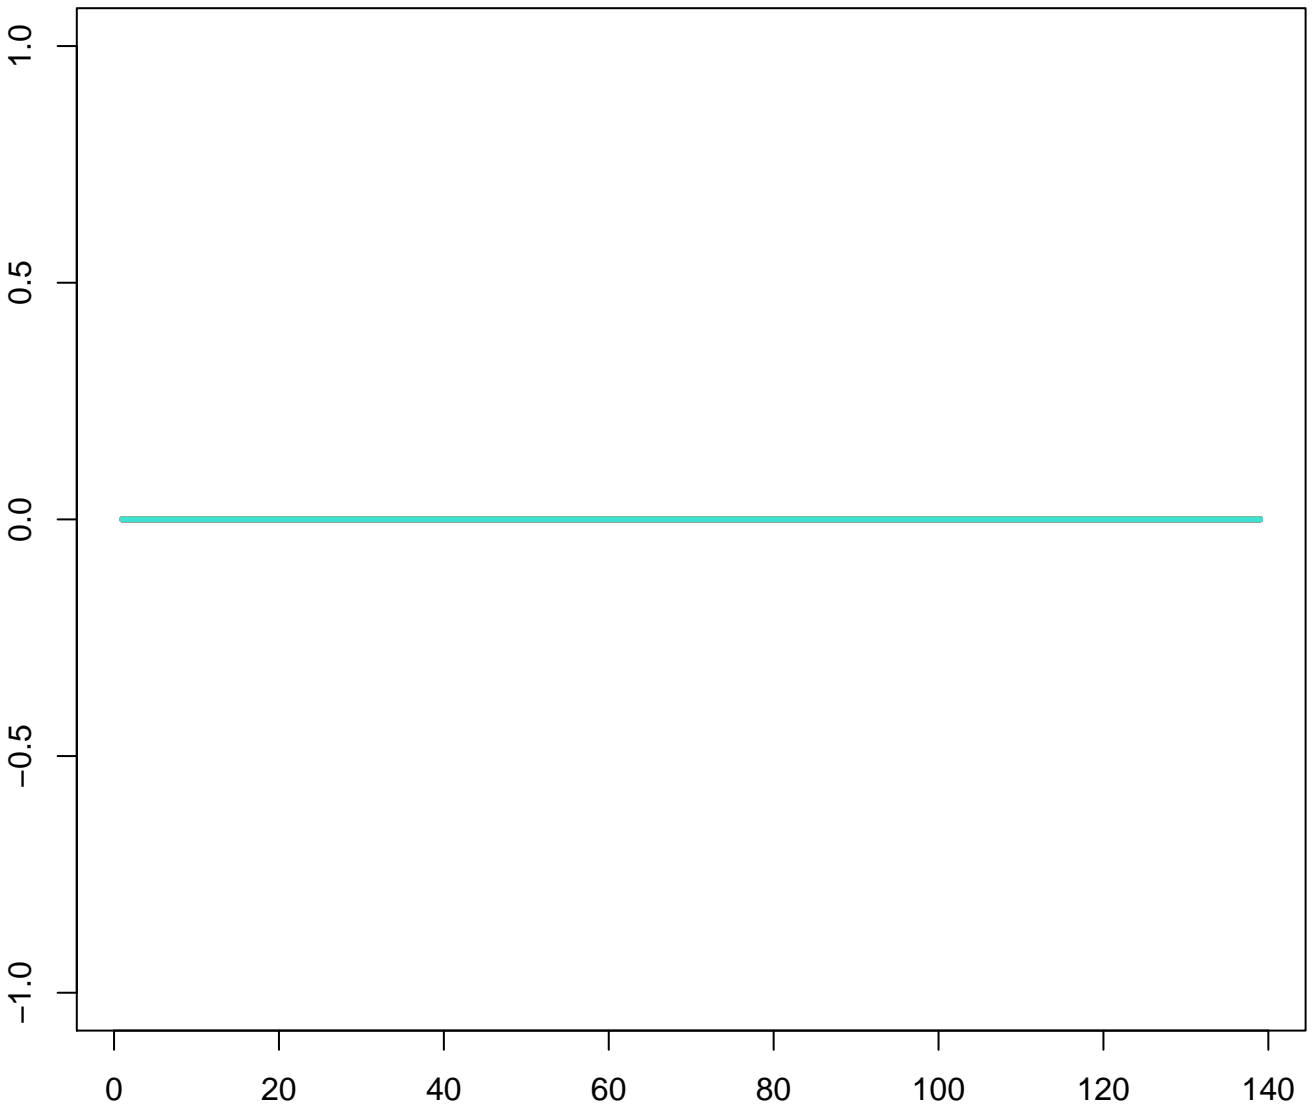

blood brain heart kidney lung ovary skin muscle testis

# 12\_56421084-56421153(+)\_mir-2113\_high

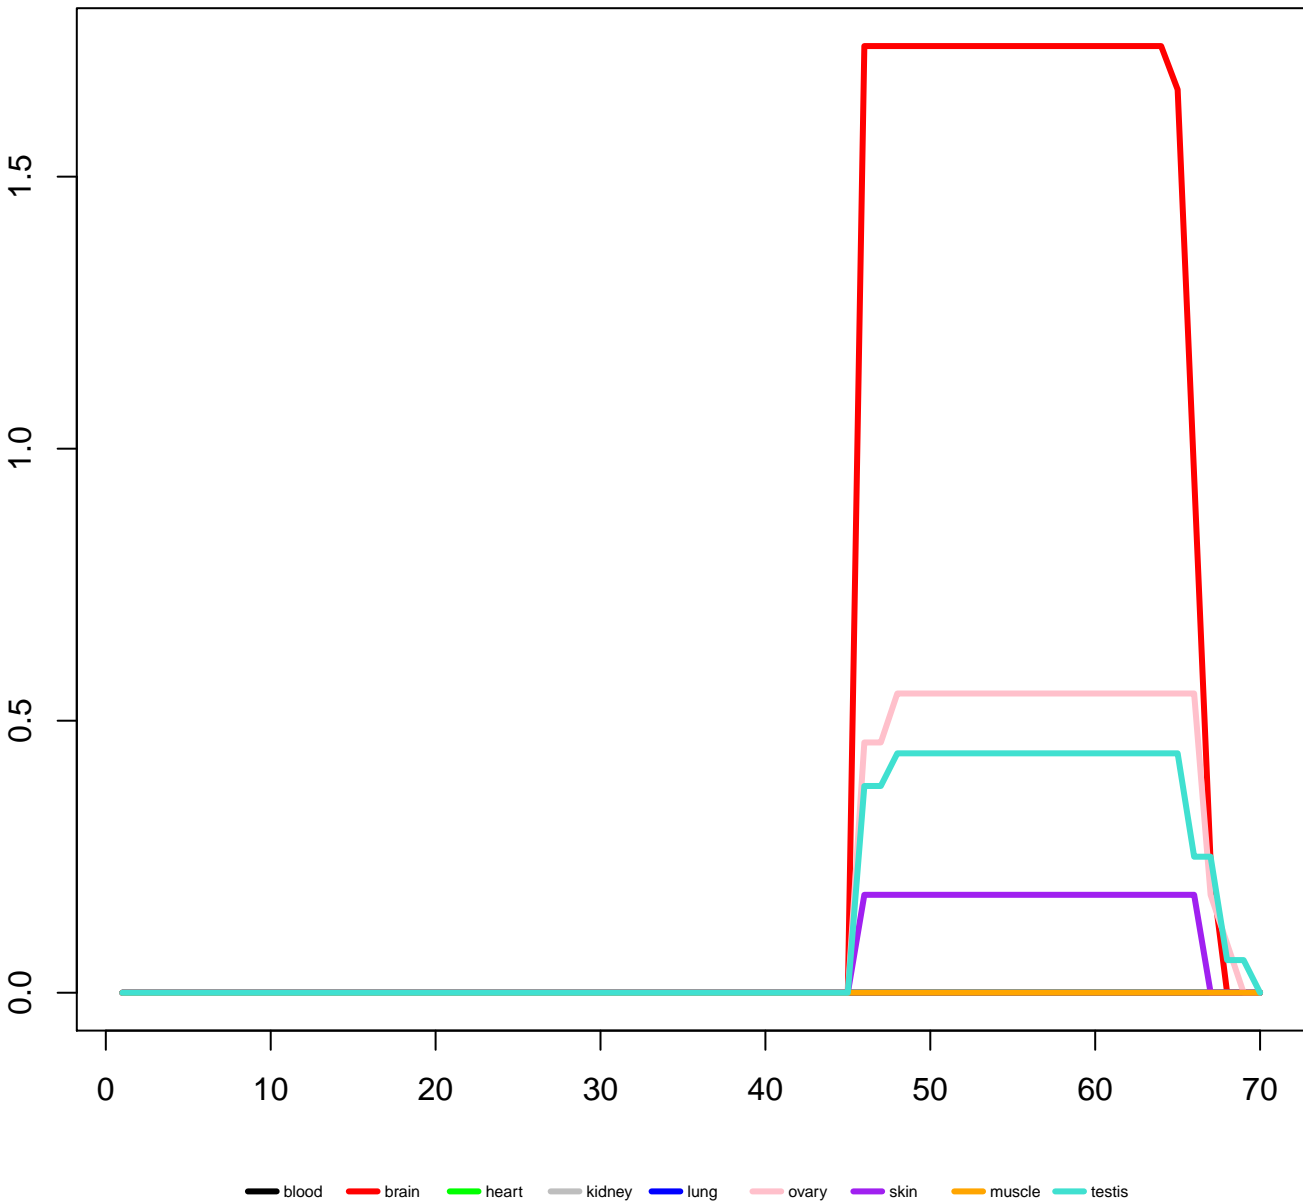

# 13\_1538928-1539022(-)\_cfa-mir-599\_high

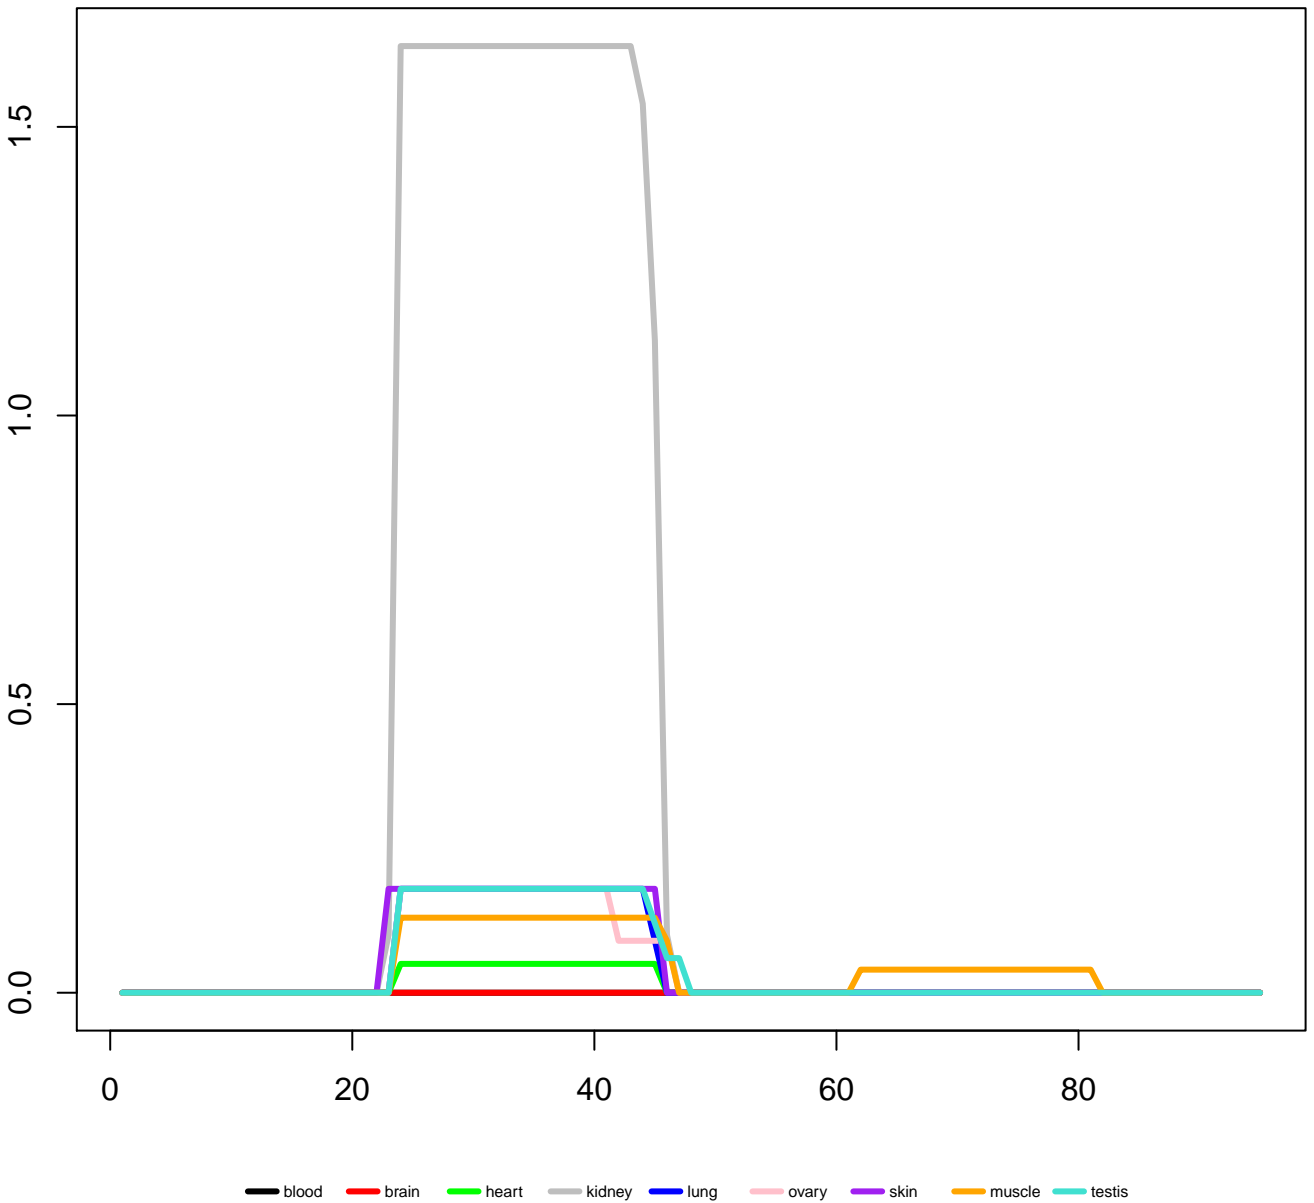

# 13\_1539078-1539151(-)\_cfa-mir-875\_low

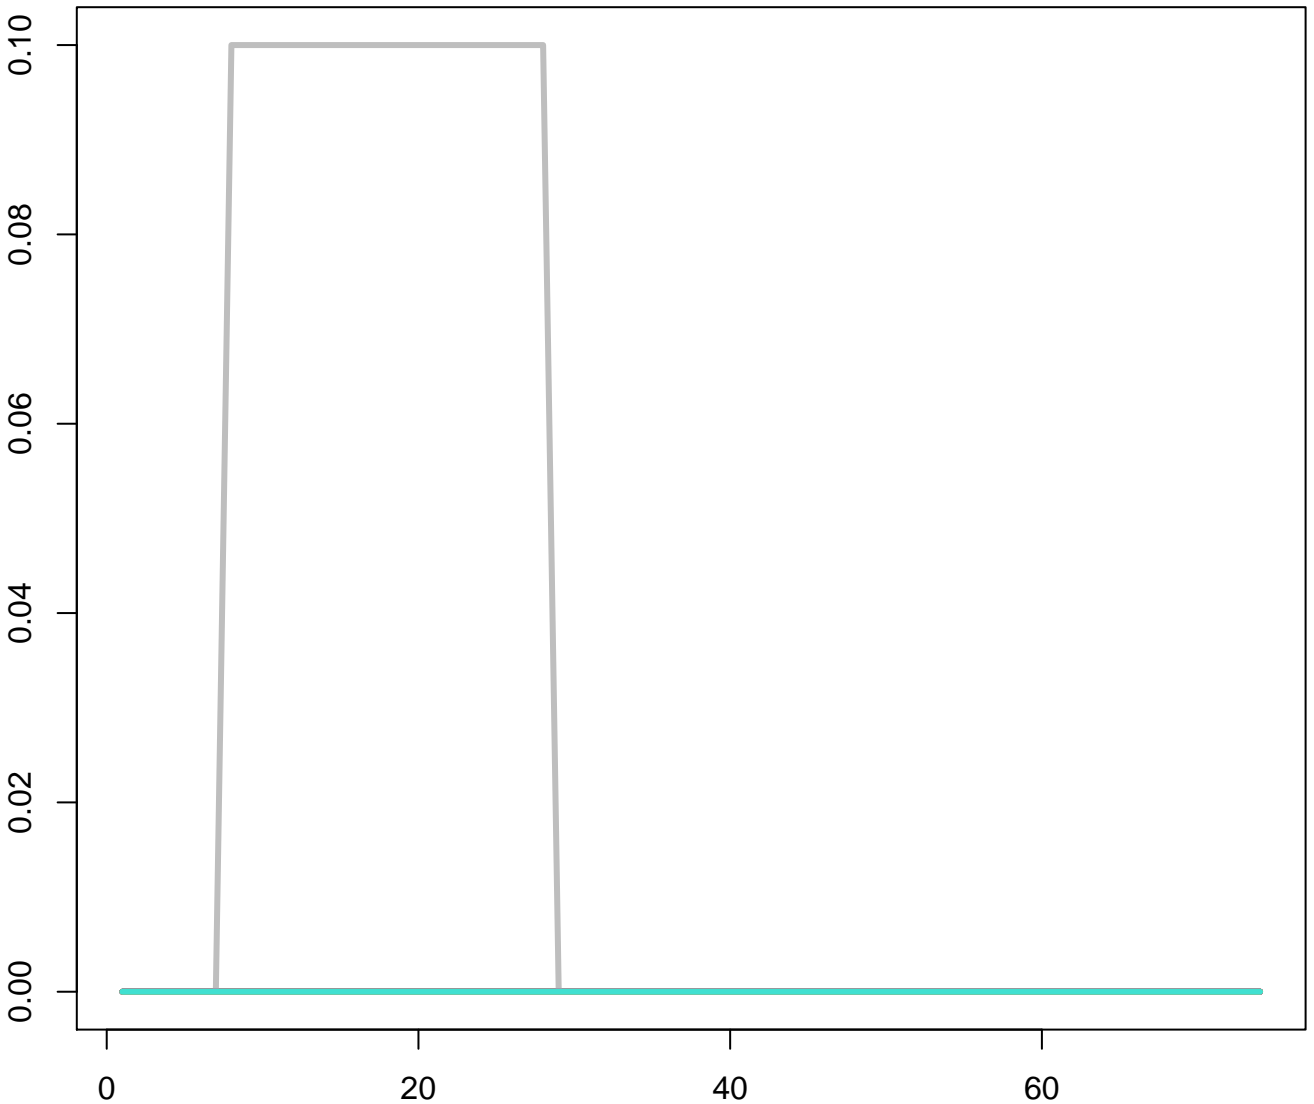

blood brain heart kidney lung ovary skin muscle testis

# 13\_9751650-9751784(+)\_cfa-mir-8836\_low

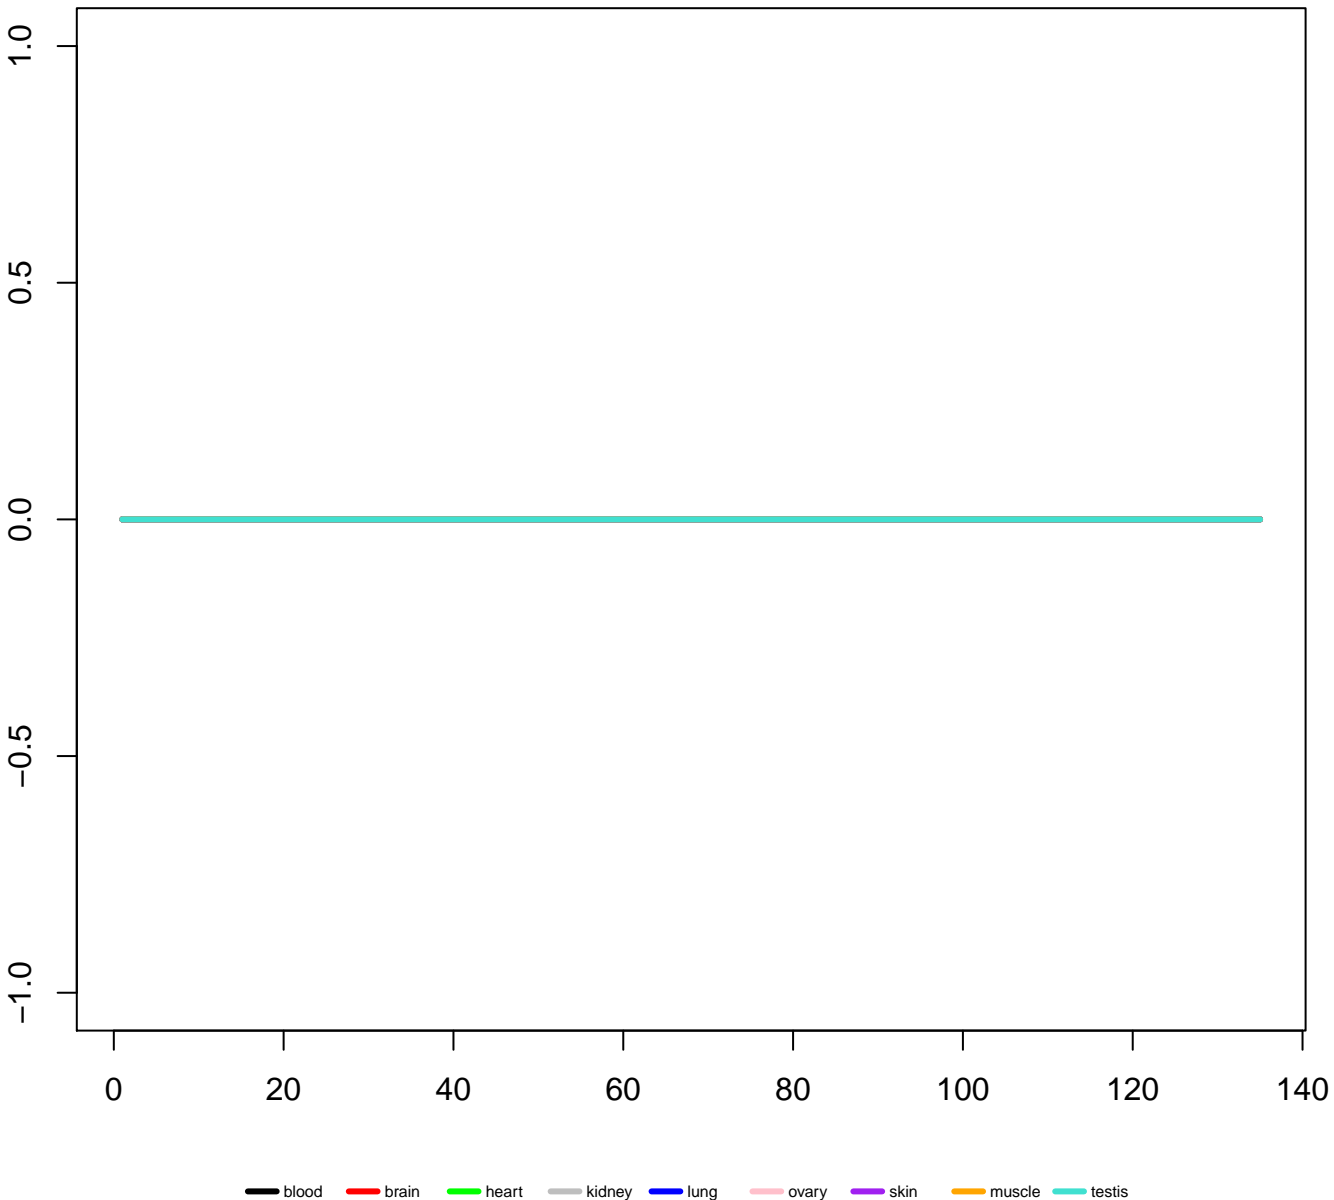

# 13\_12774532-12774622(+)\_mir-2053\_low

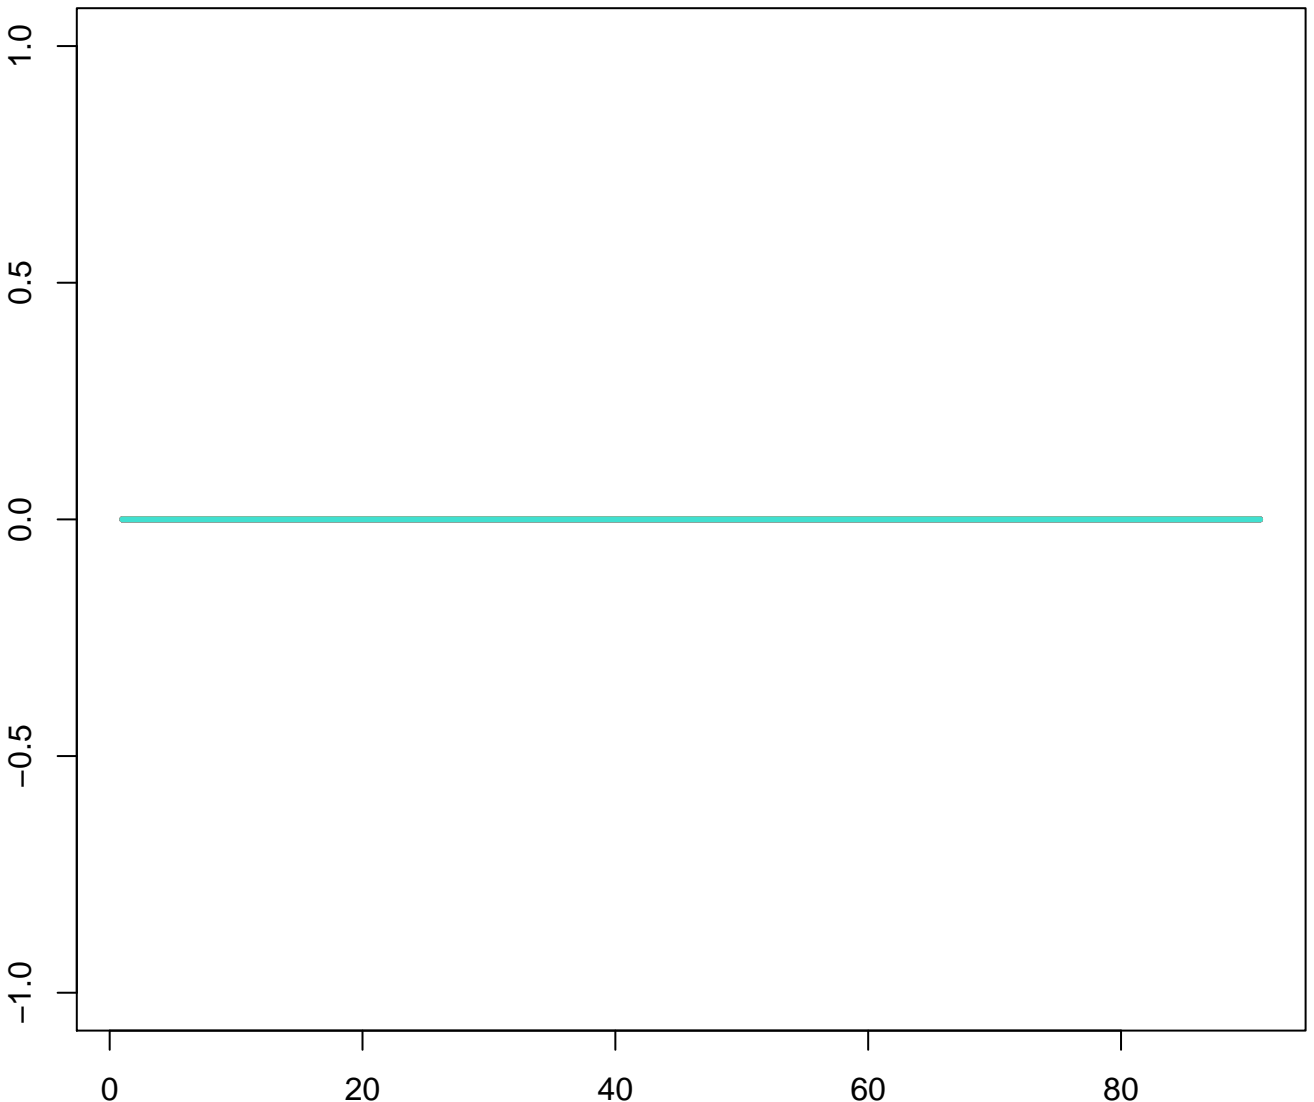

— blood — brain — heart — kidney — lung — ovary — skin — muscle — testis



# 13\_30910306-30910365(-)\_cfa-mir-30d\_high

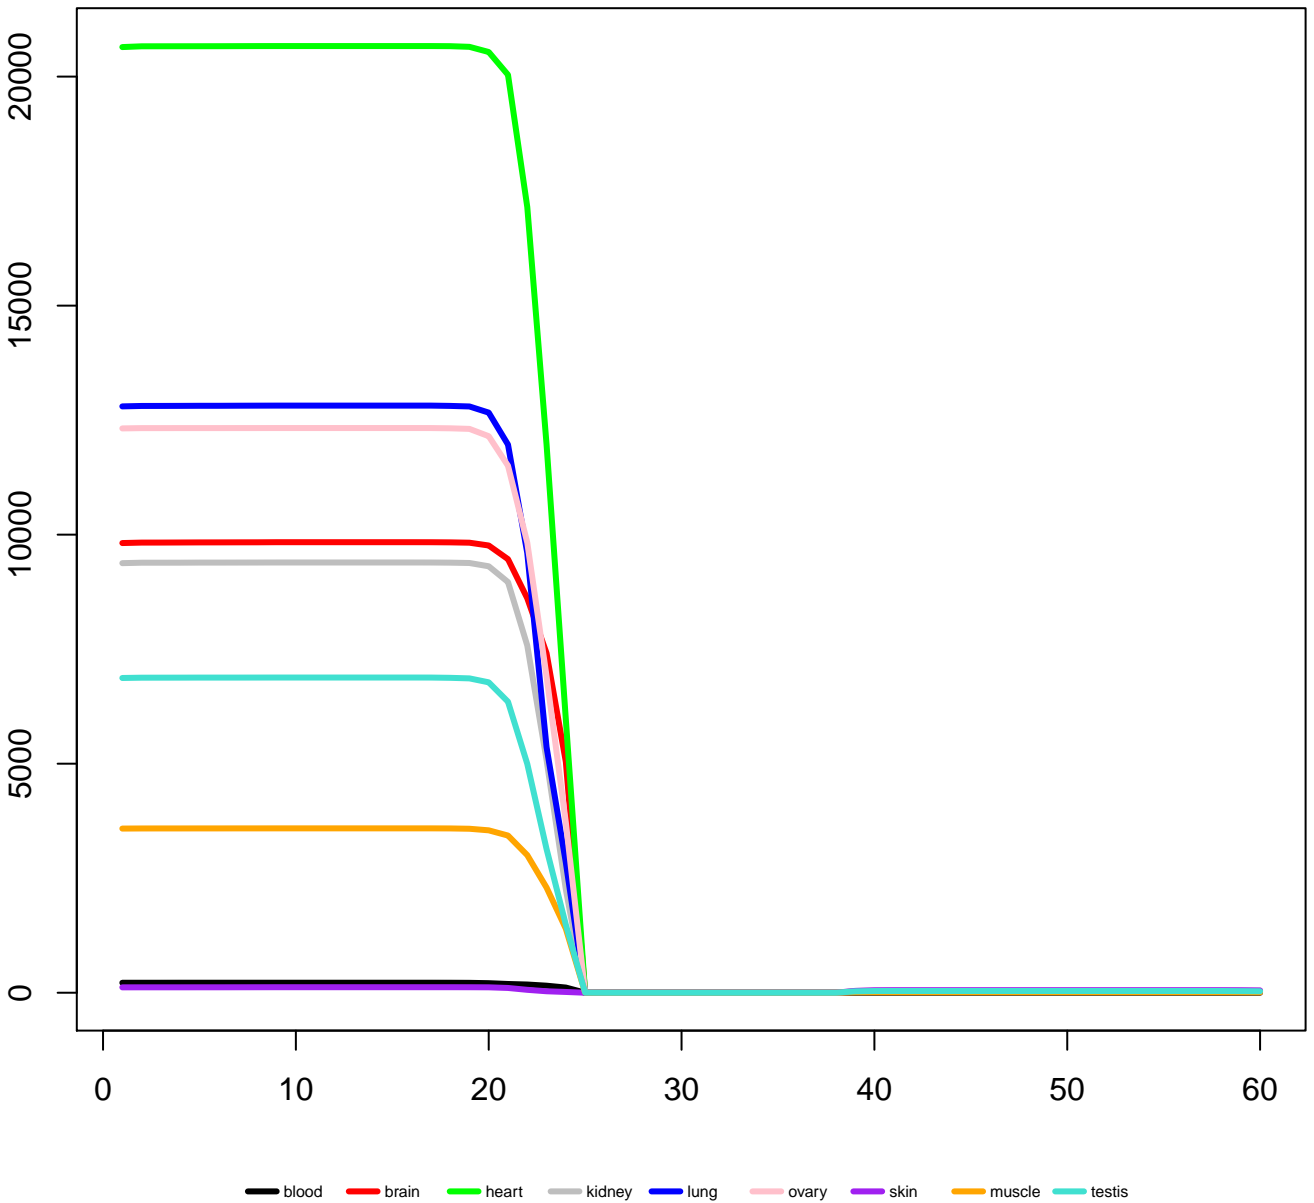



# 13\_35353689-35353744(-)\_cfa-mir-151\_high

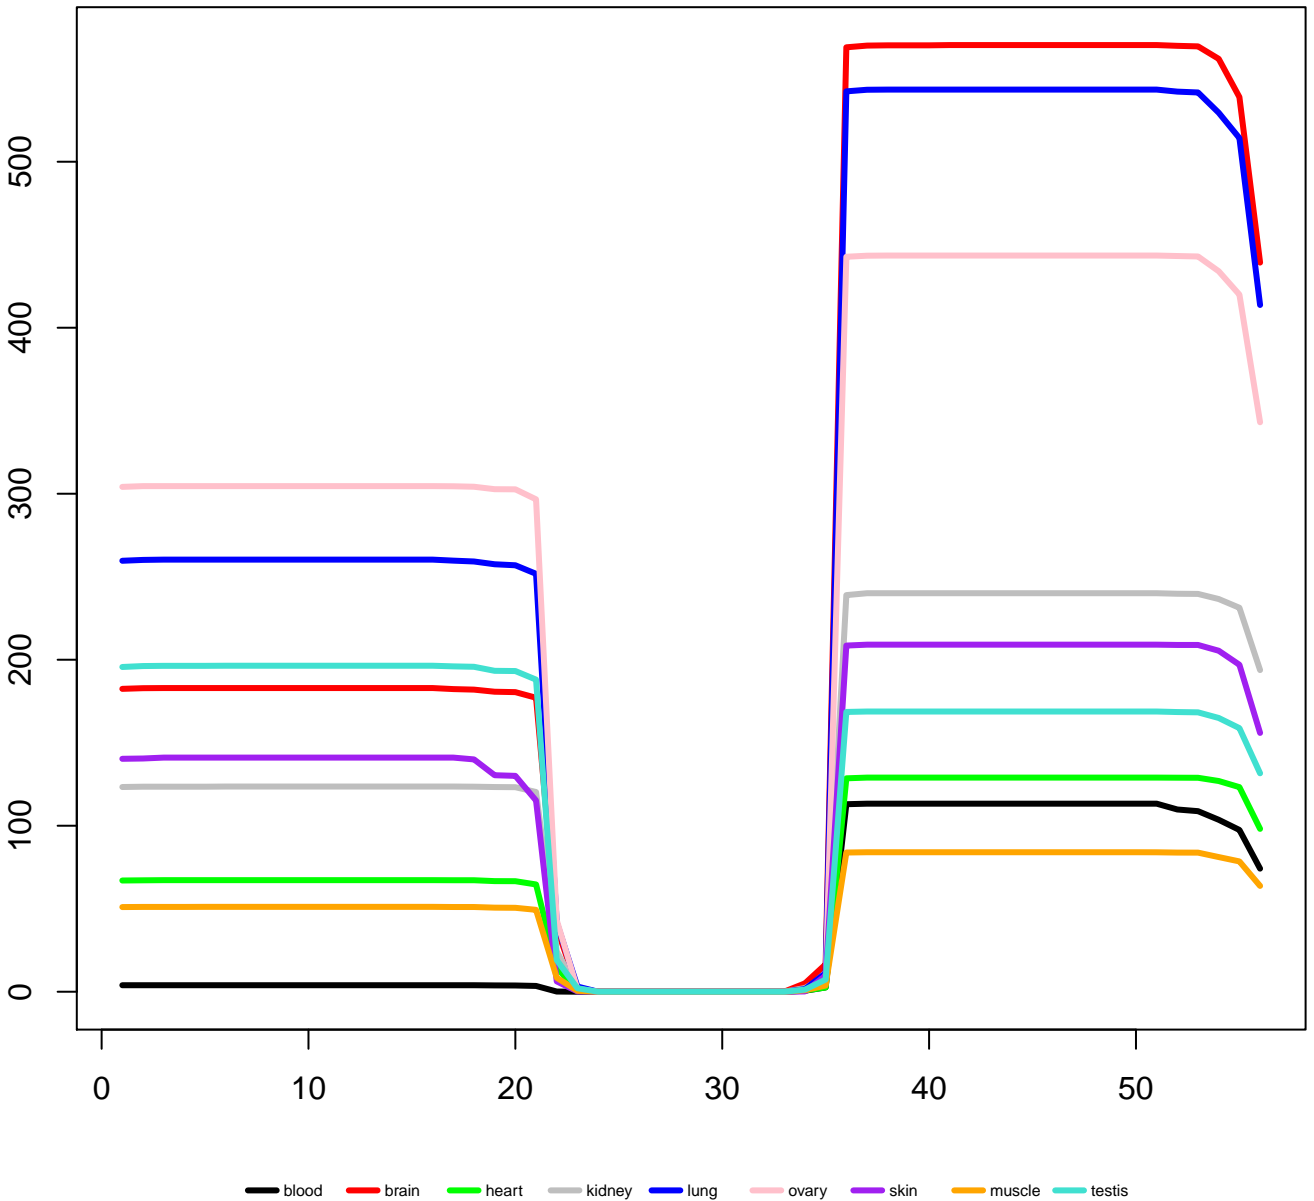

# 13\_40256908-40257040(-)\_cfa-mir-8880\_low

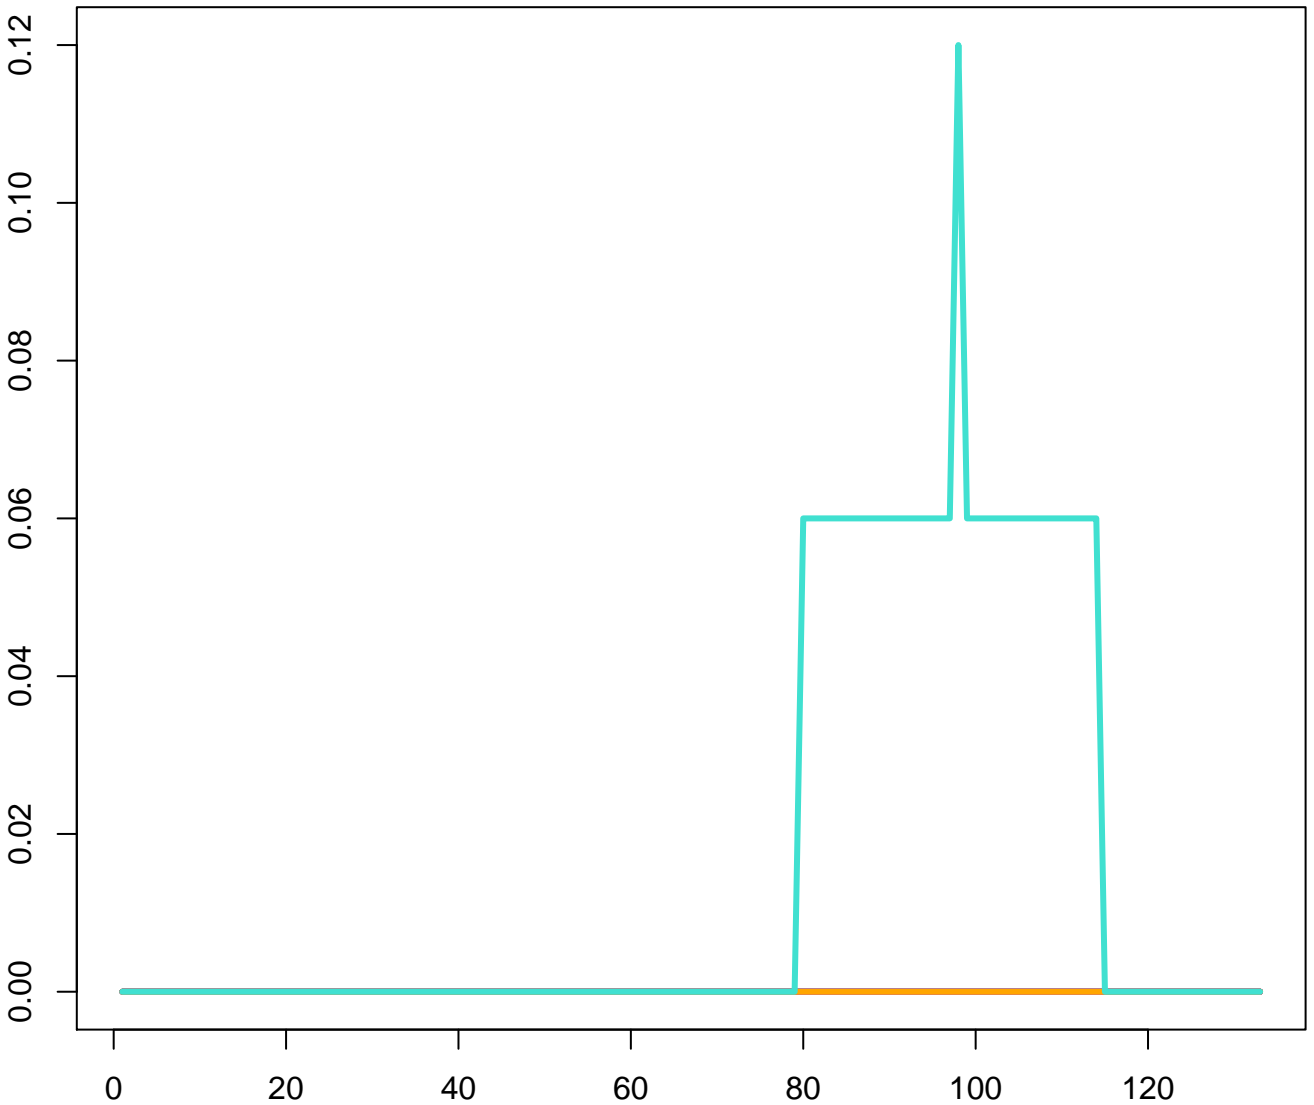

blood brain heart kidney lung ovary skin muscle testis

# 13\_40692846-40692978(+)\_cfa-mir-8880\_low

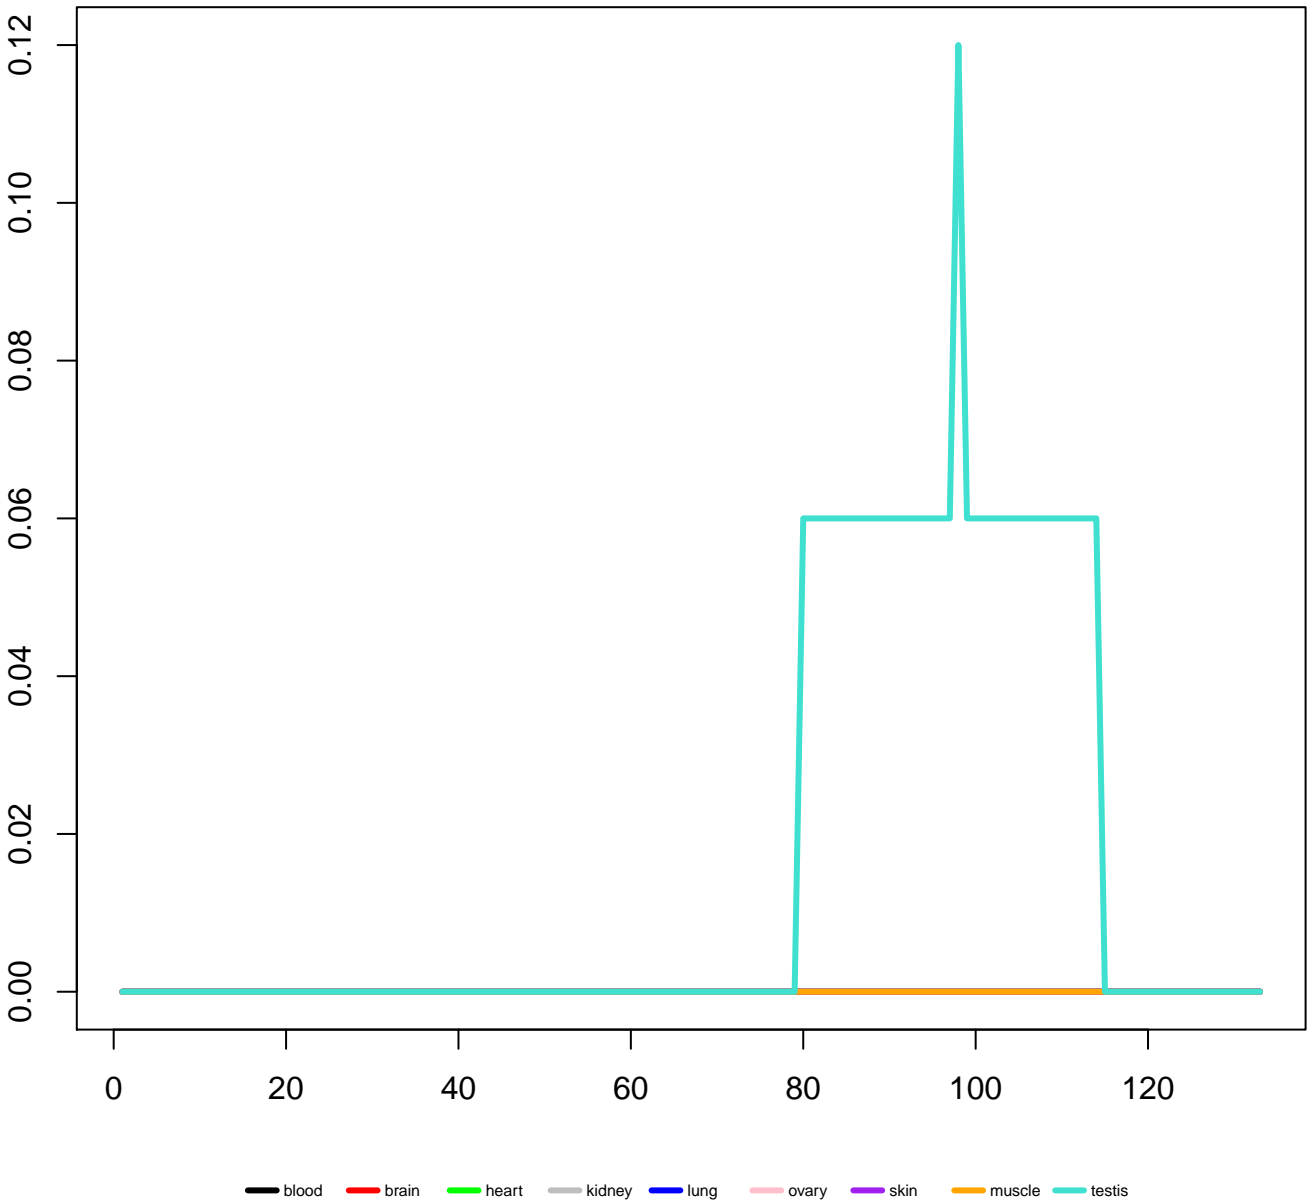

# 14\_6184457-6184521(+)\_cfa-mir-29b-1\_high

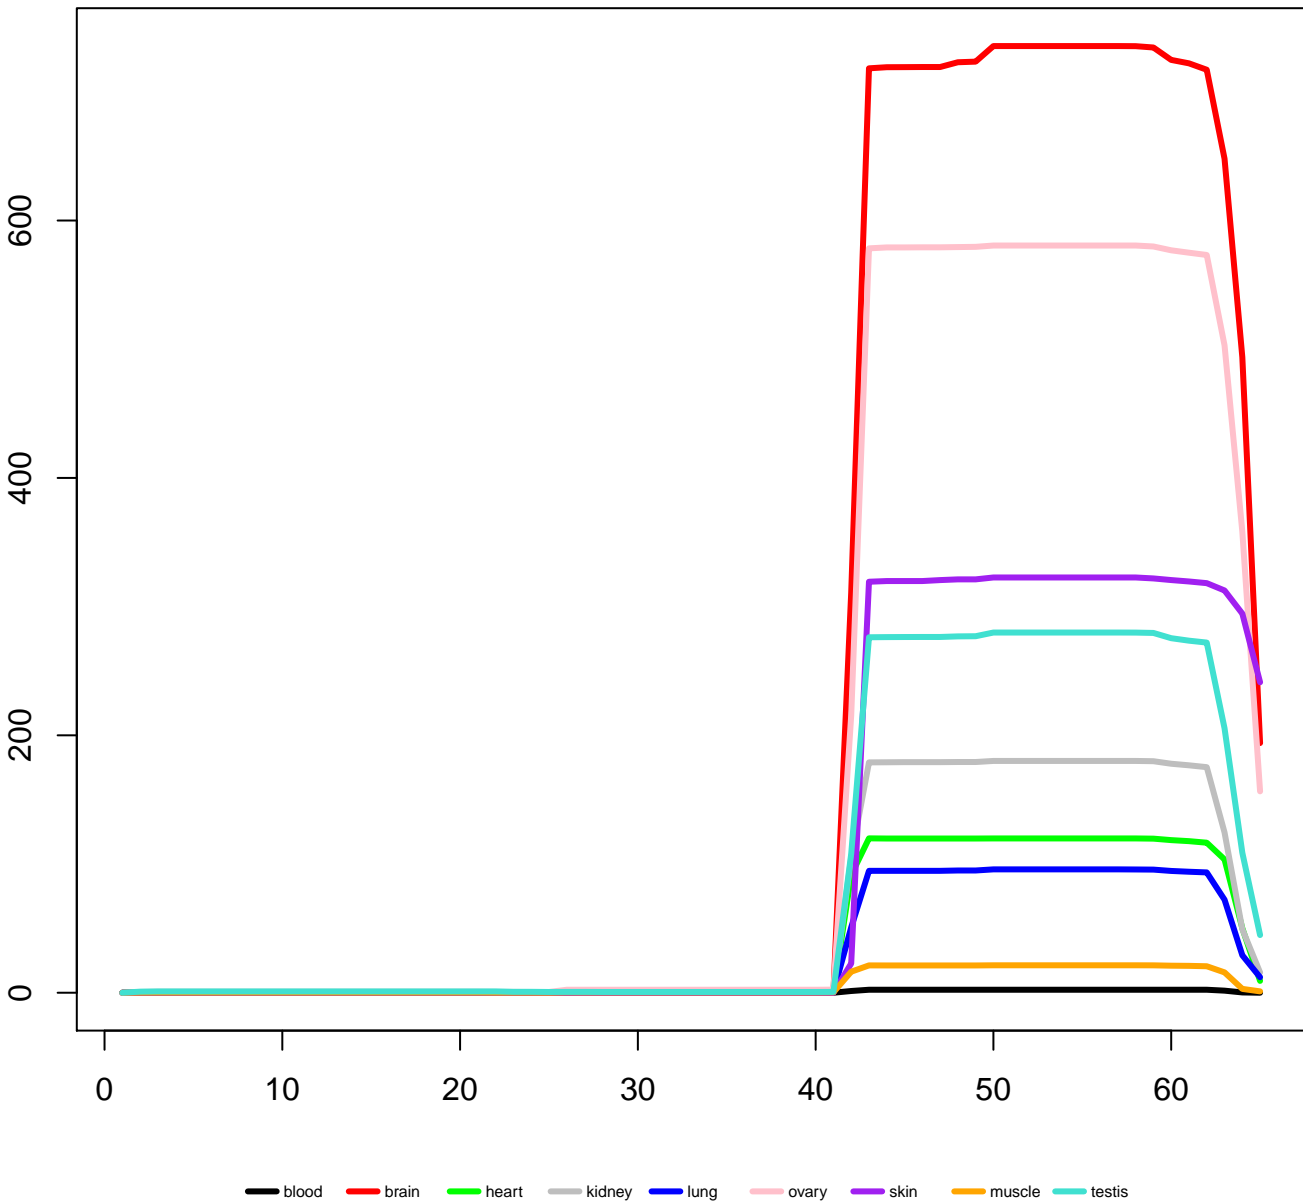

# 14\_6184844-6184903(+)\_cfa-mir-29a\_high

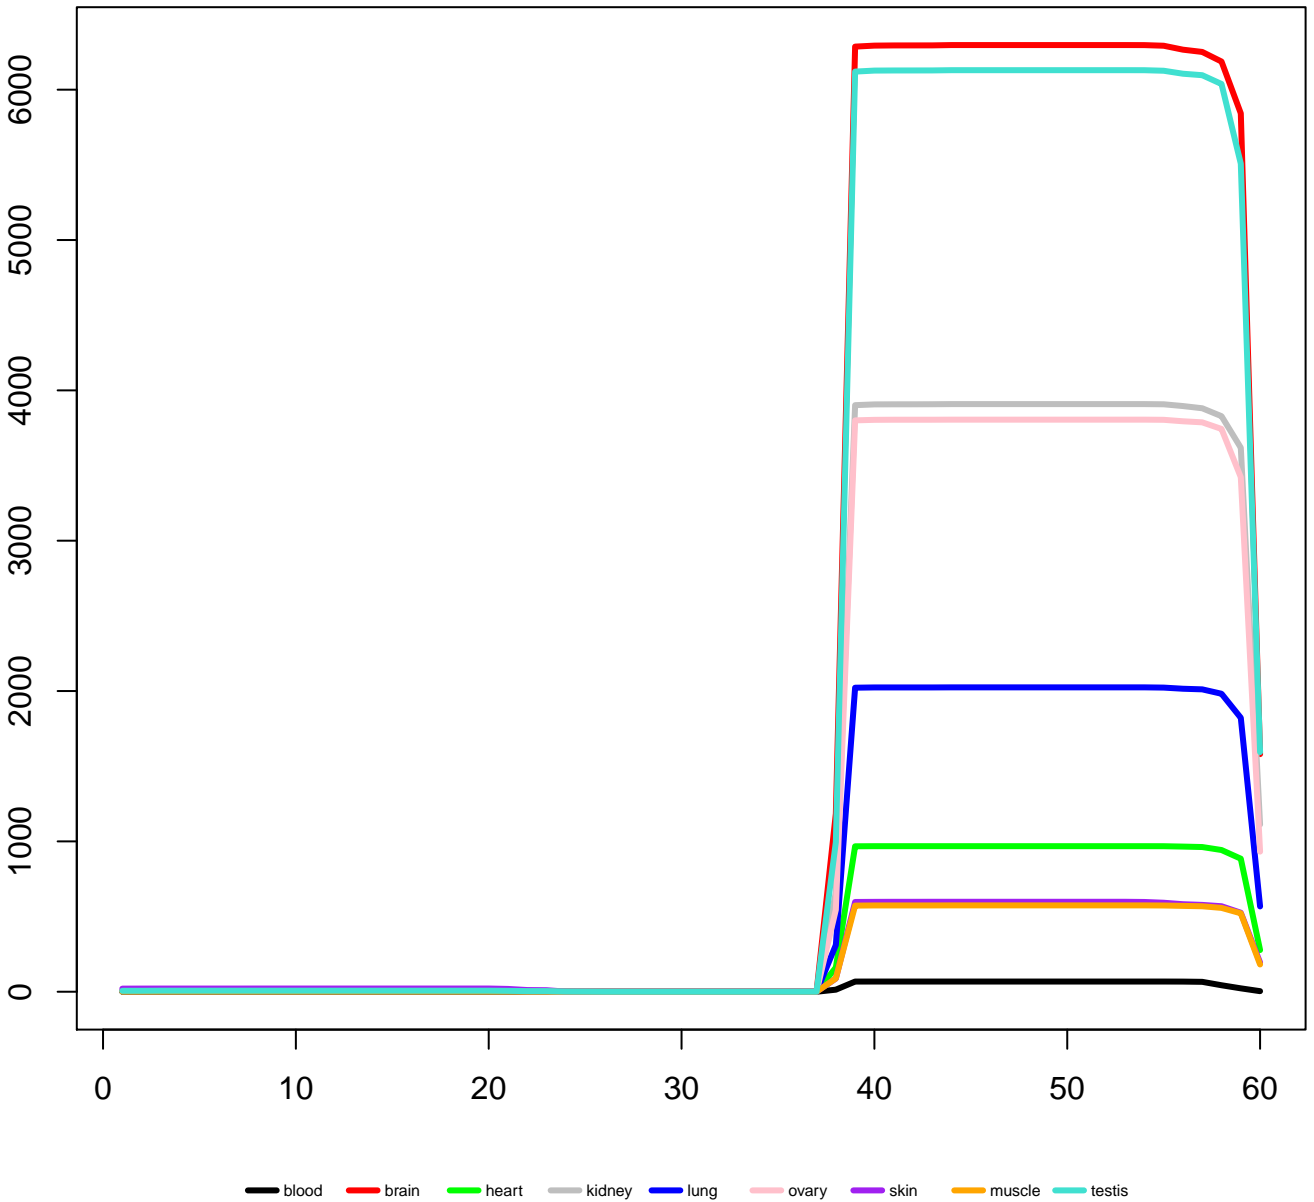

# 14\_6444861-6444918(-)\_cfa-mir-335\_high

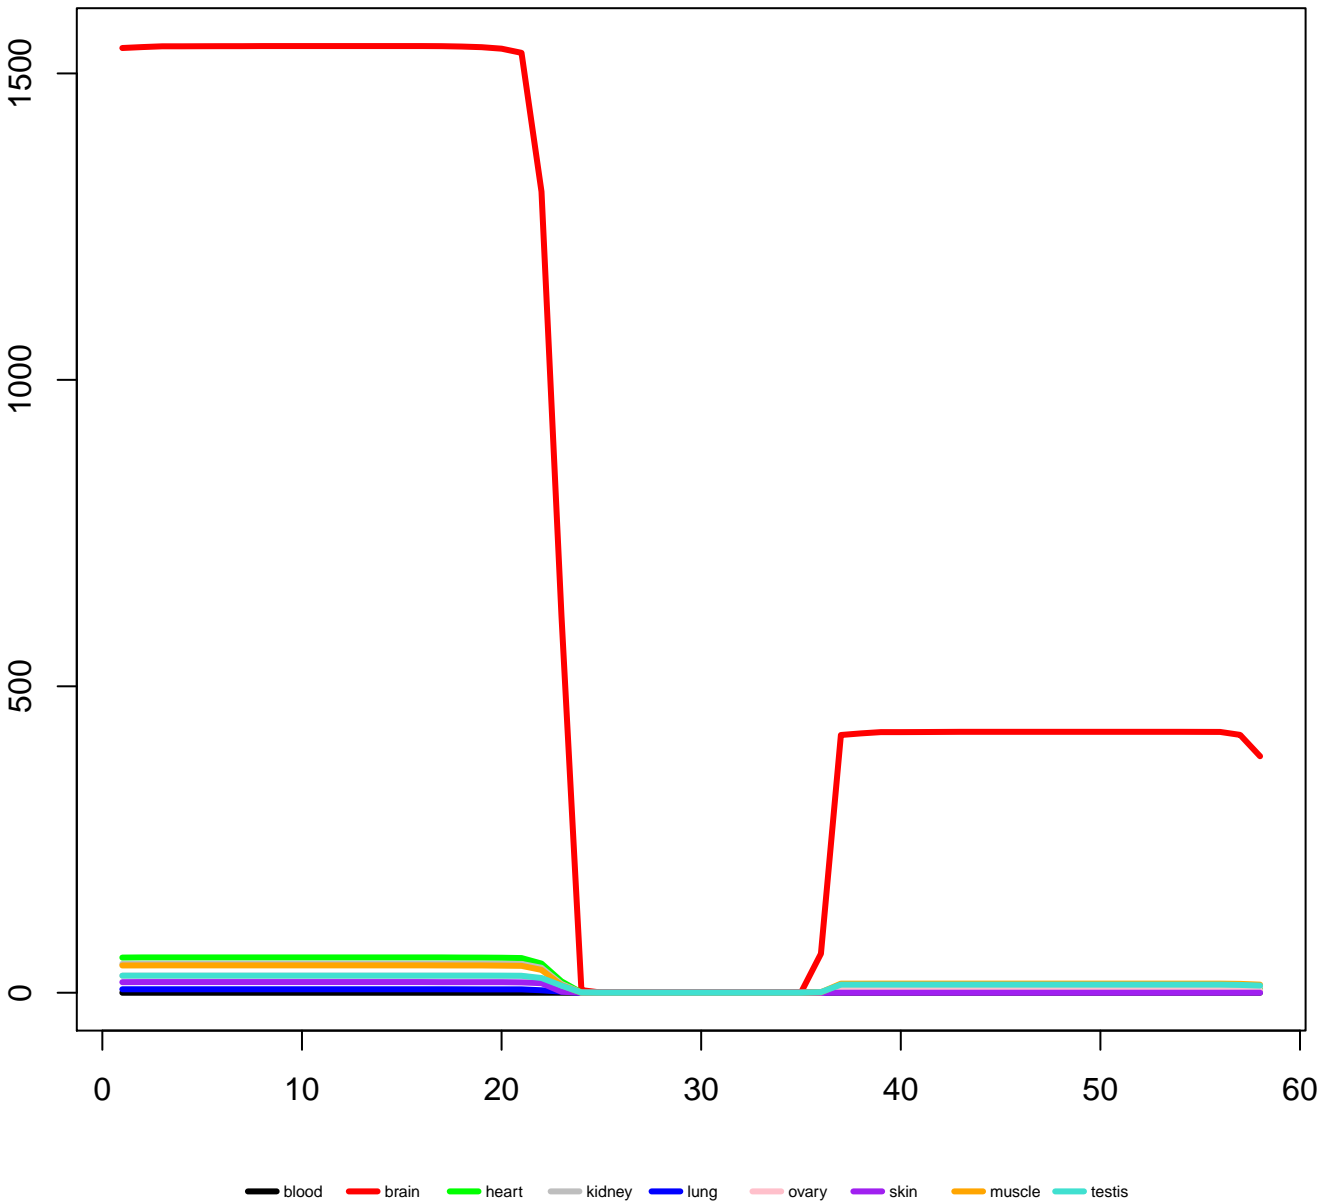



# 14\_7068754-7068842(+)\_cfa-mir-96\_high

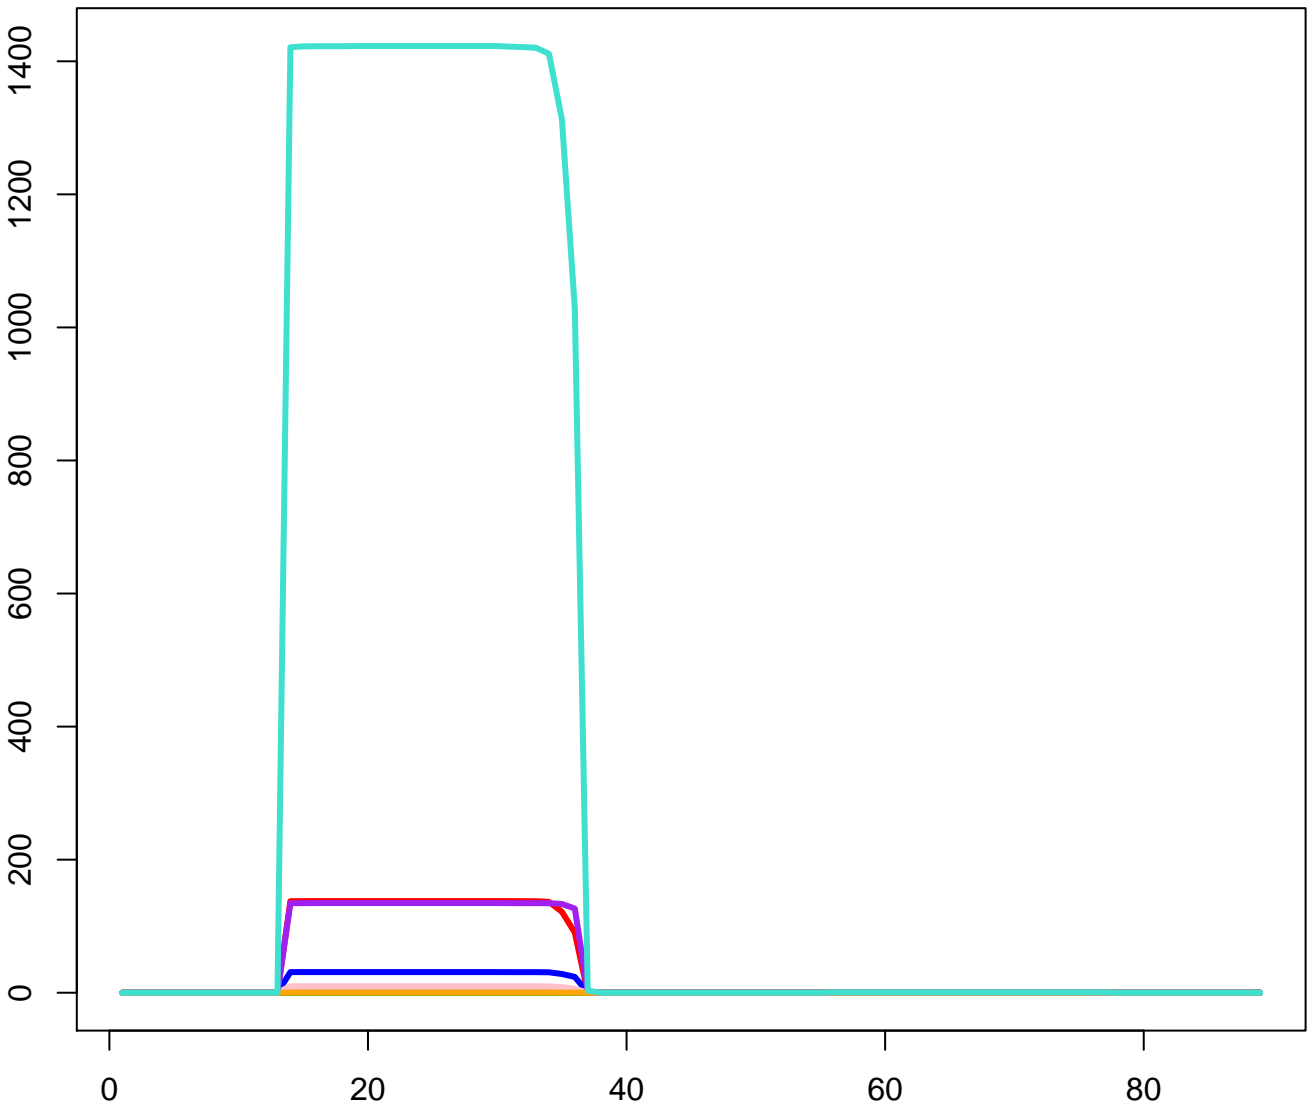

— blood — brain — heart — kidney — lung — ovary — skin — muscle — testis



# 14\_7072705-7072796(+)\_cfa-mir-182\_high

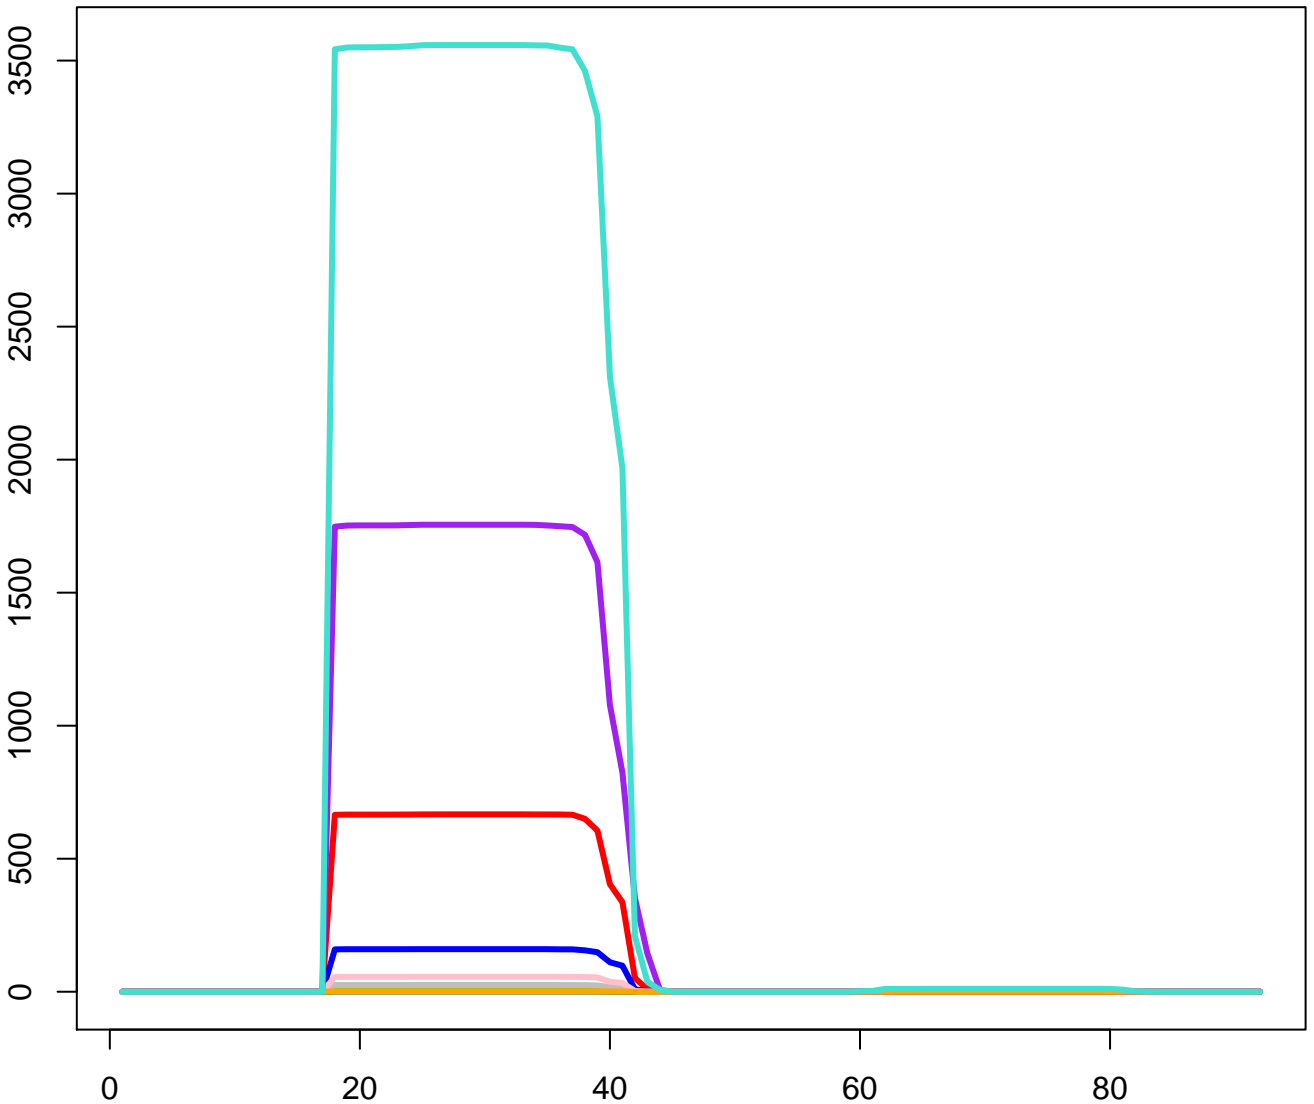

— blood — brain — heart — kidney — lung — ovary — skin — muscle — testis

# 14\_7850266-7850385(+)\_mir-9082\_low

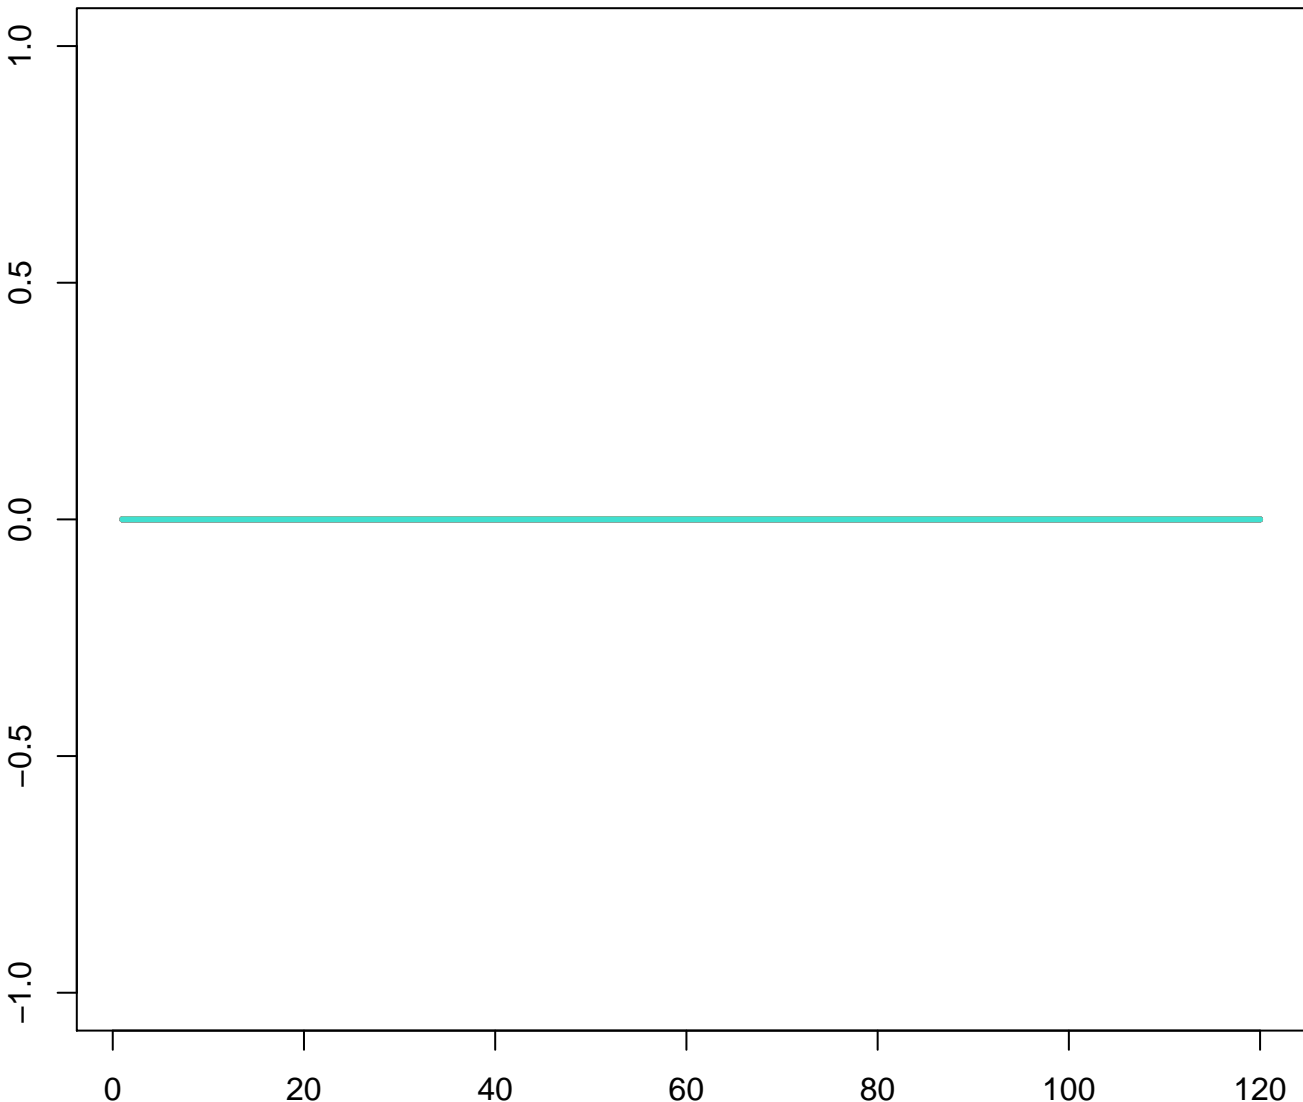

Legend: blood (black), brain (red), heart (green), kidney (grey), lung (blue), ovary (pink), skin (purple), muscle (orange), testis (teal)

# 14\_8165110-8165174(-)\_cfa-mir-129-1\_high

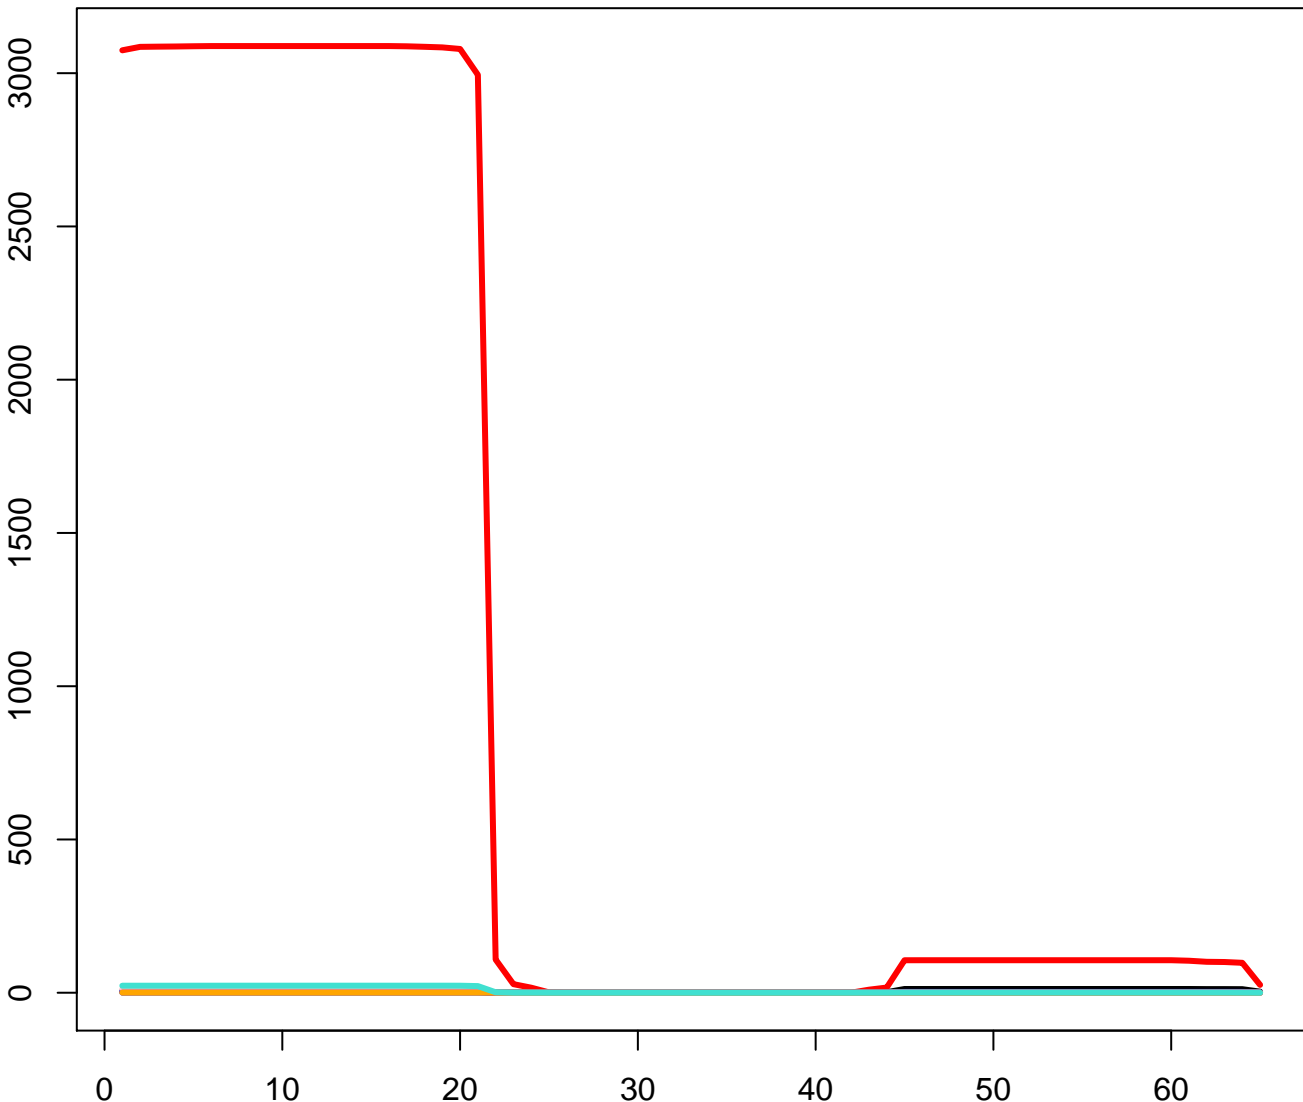

— blood — brain — heart — kidney — lung — ovary — skin — muscle — testis

# 14\_9182237-9182331(+)\_cfa-mir-592\_high

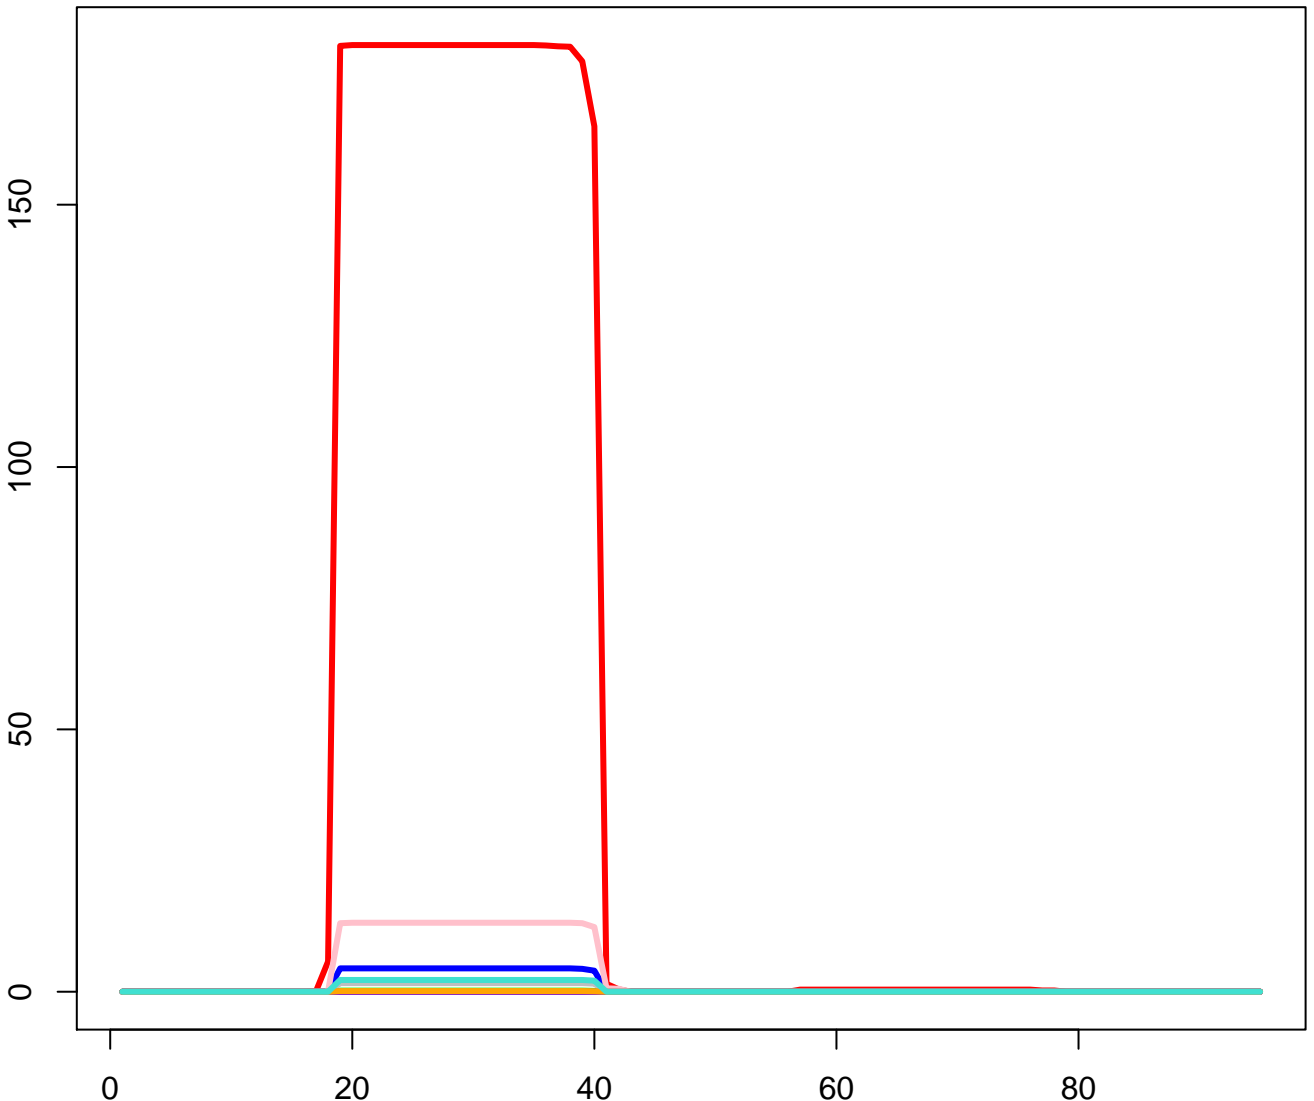

— blood — brain — heart — kidney — lung — ovary — skin — muscle — testis



# 14\_18980180-18980263(-)\_cfa-mir-489\_high

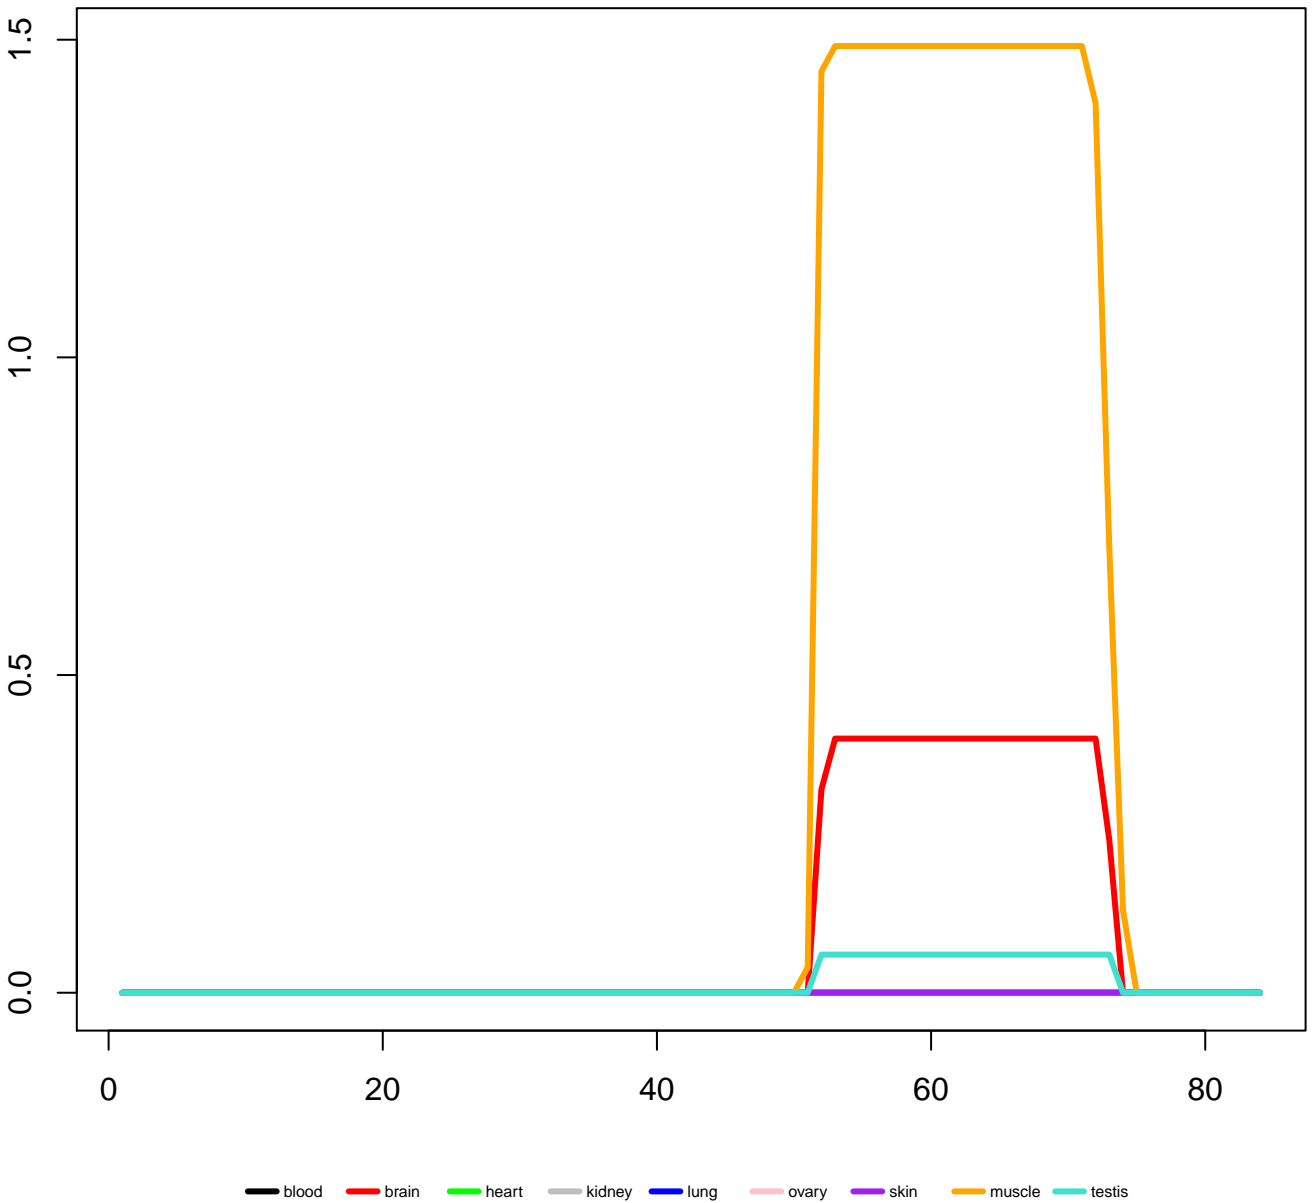

# 14\_22318762-22318856(-)\_cfa-mir-8841-2\_low

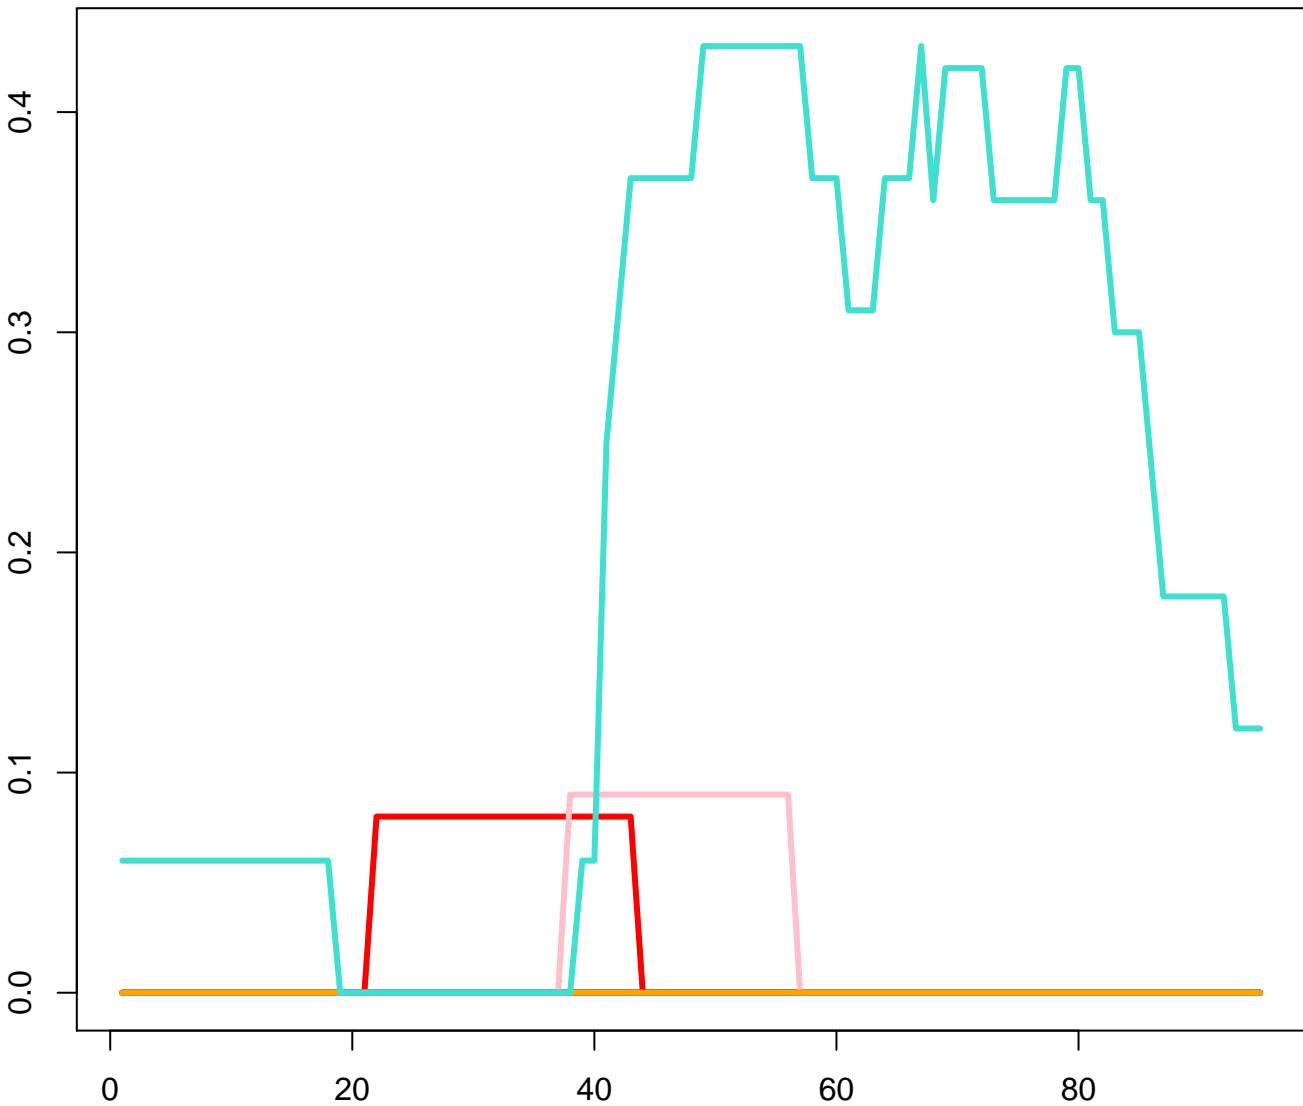

— blood — brain — heart — kidney — lung — ovary — skin — muscle — testis

# 14\_39301847-39301906(-)\_cfa-mir-148a\_high

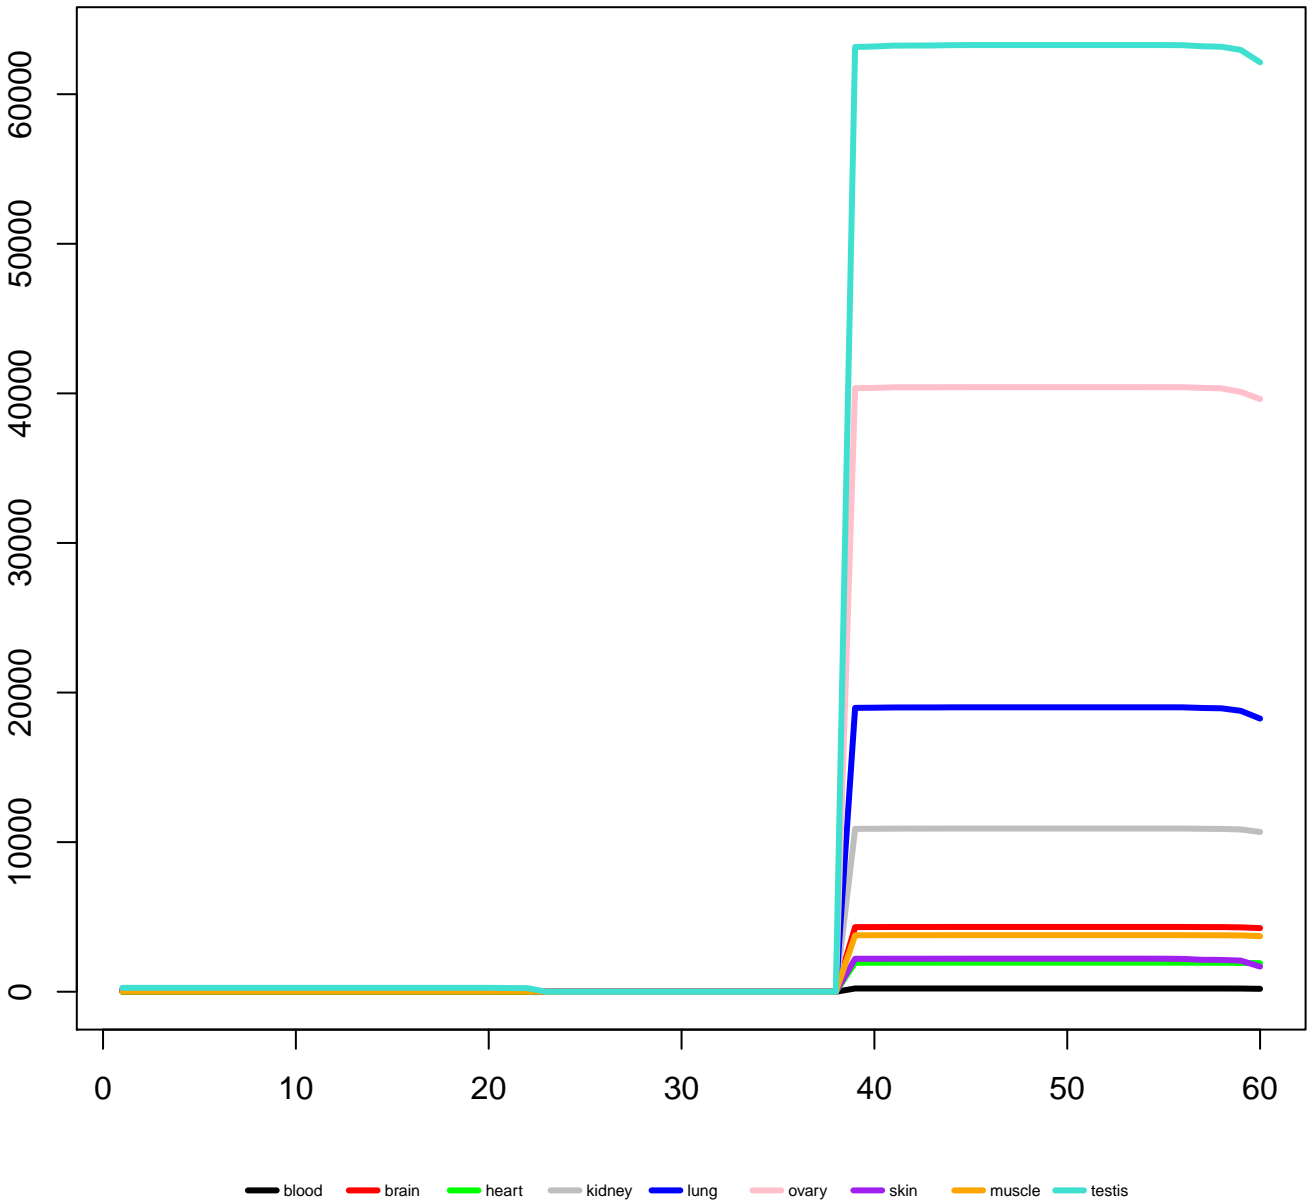



# 14\_40344005-40344062(-)\_cfa-mir-196b\_high

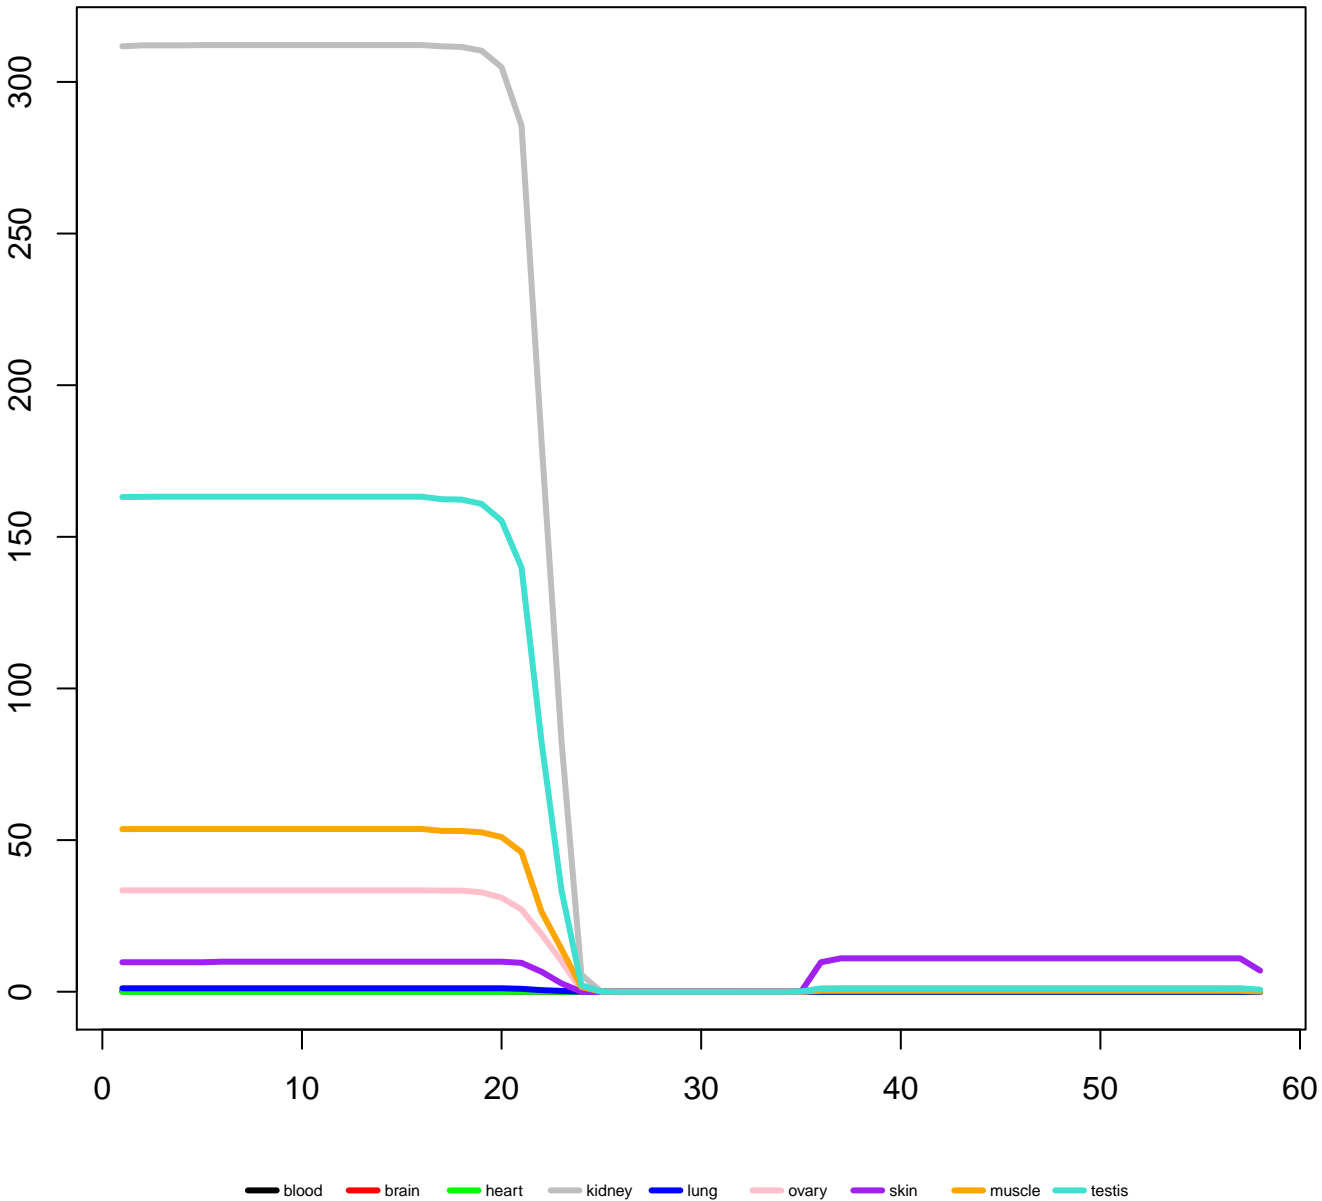

# 14\_53825737-53825848(+)\_mir-3666\_low

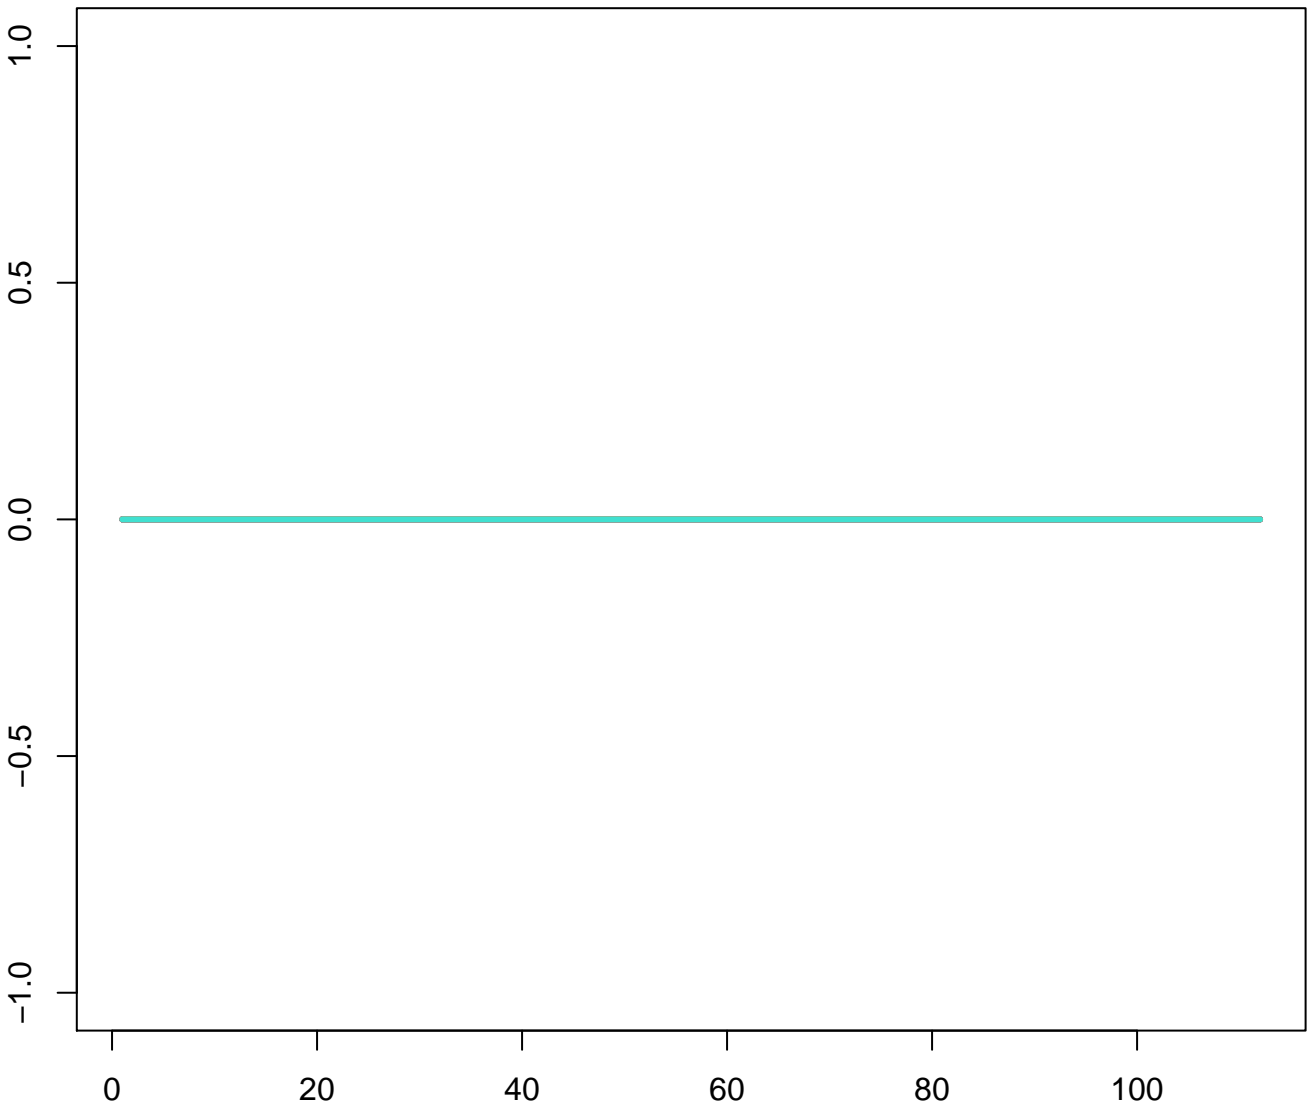

blood brain heart kidney lung ovary skin muscle testis

# 15\_1285317-1285441(+)\_cfa-mir-8839\_low

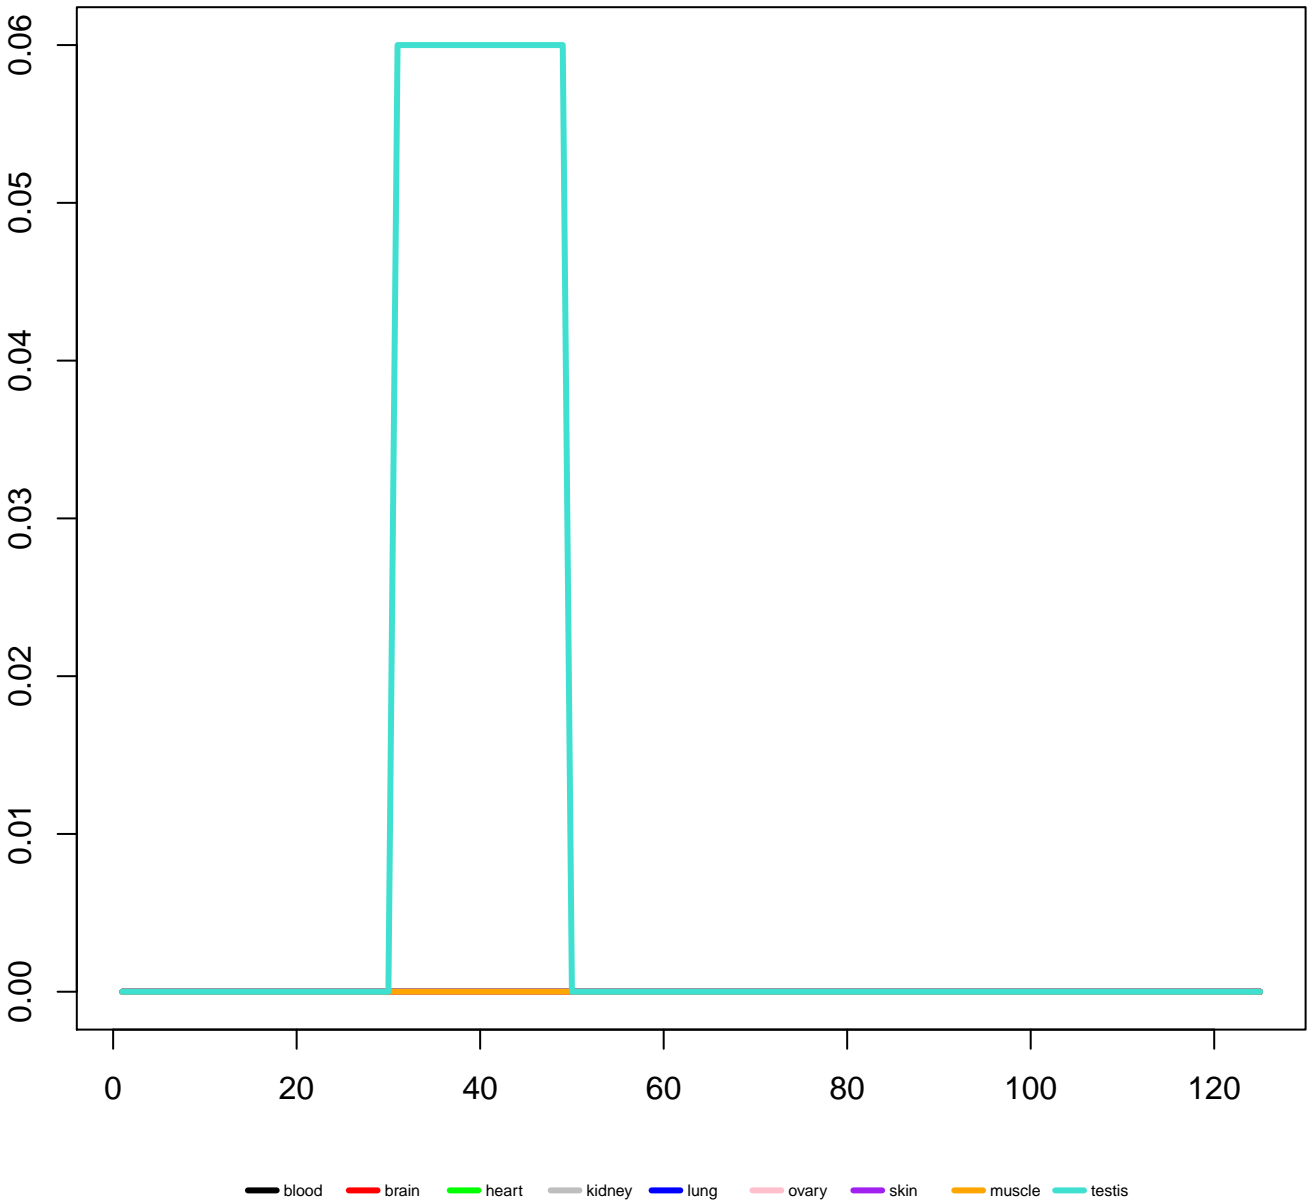

# 15\_2280050-2280110(-)\_cfa-mir-30c-1\_high

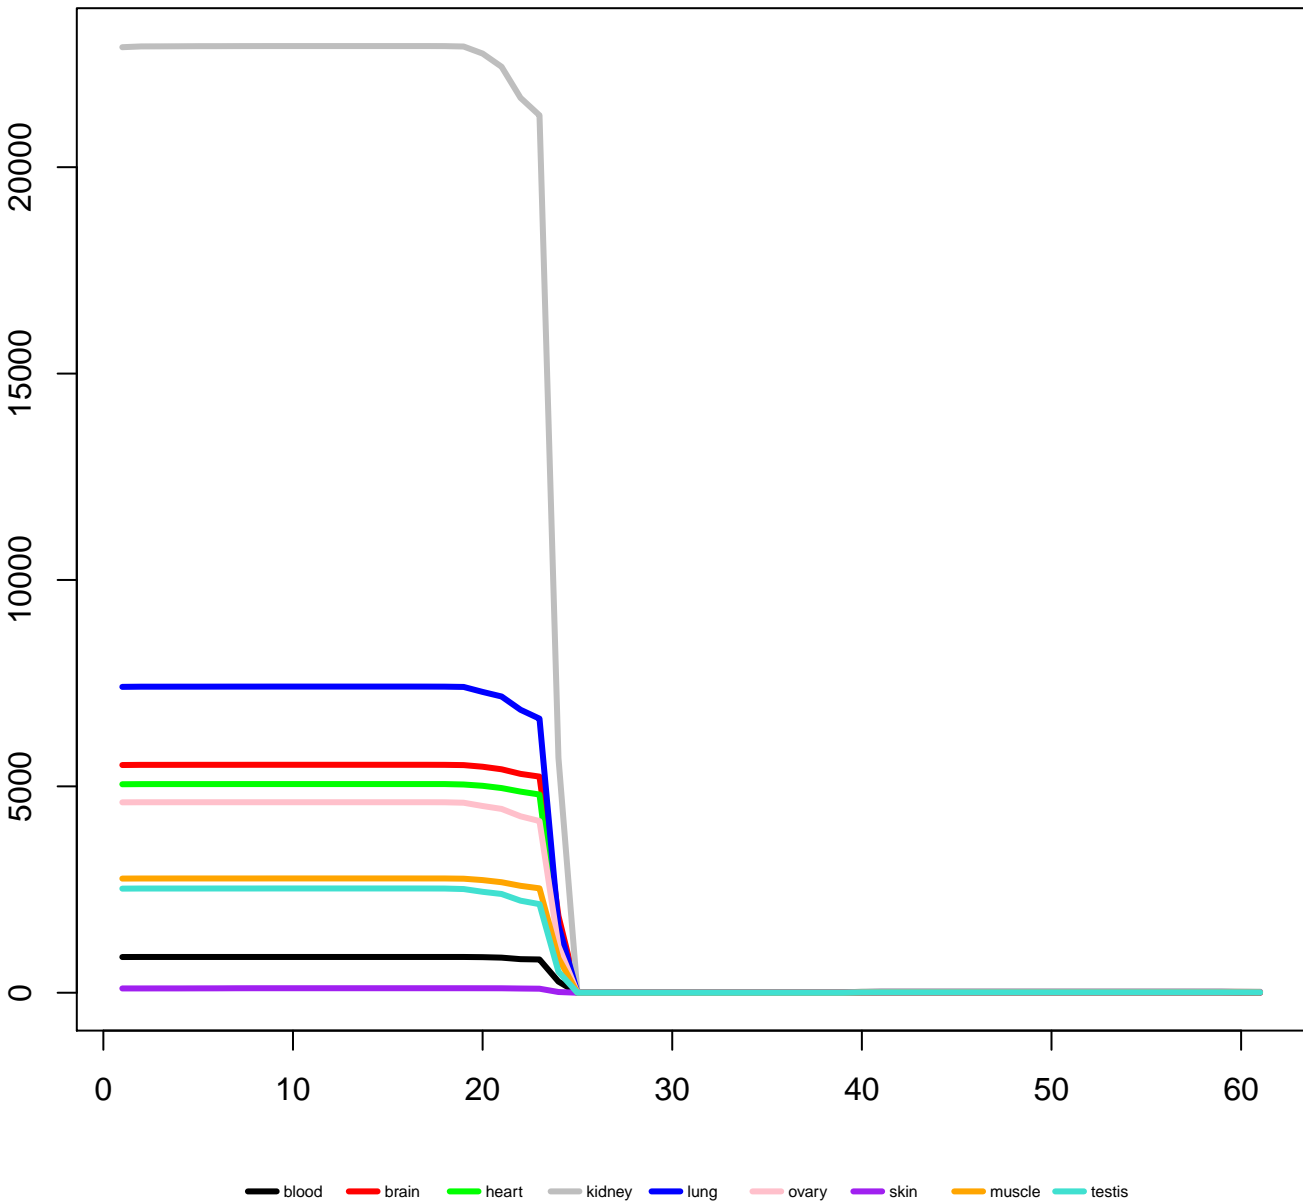

# 15\_2283306-2283369(-)\_cfa-mir-30e\_high

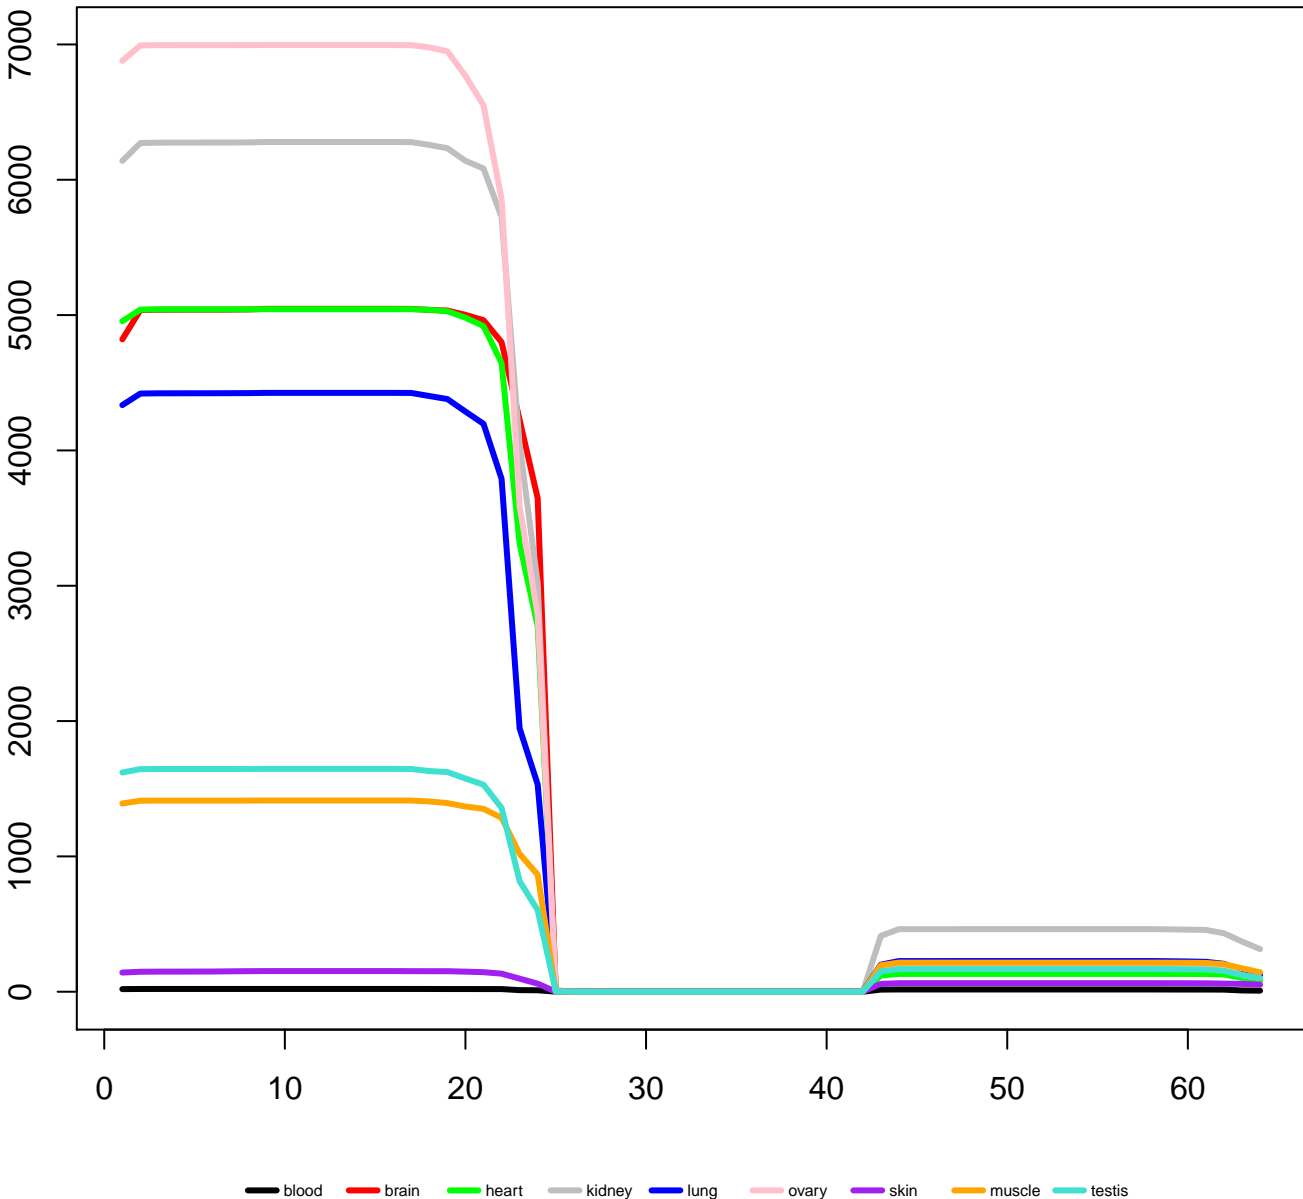

# 15\_9455388-9455457(+)\_cfa-mir-761\_low

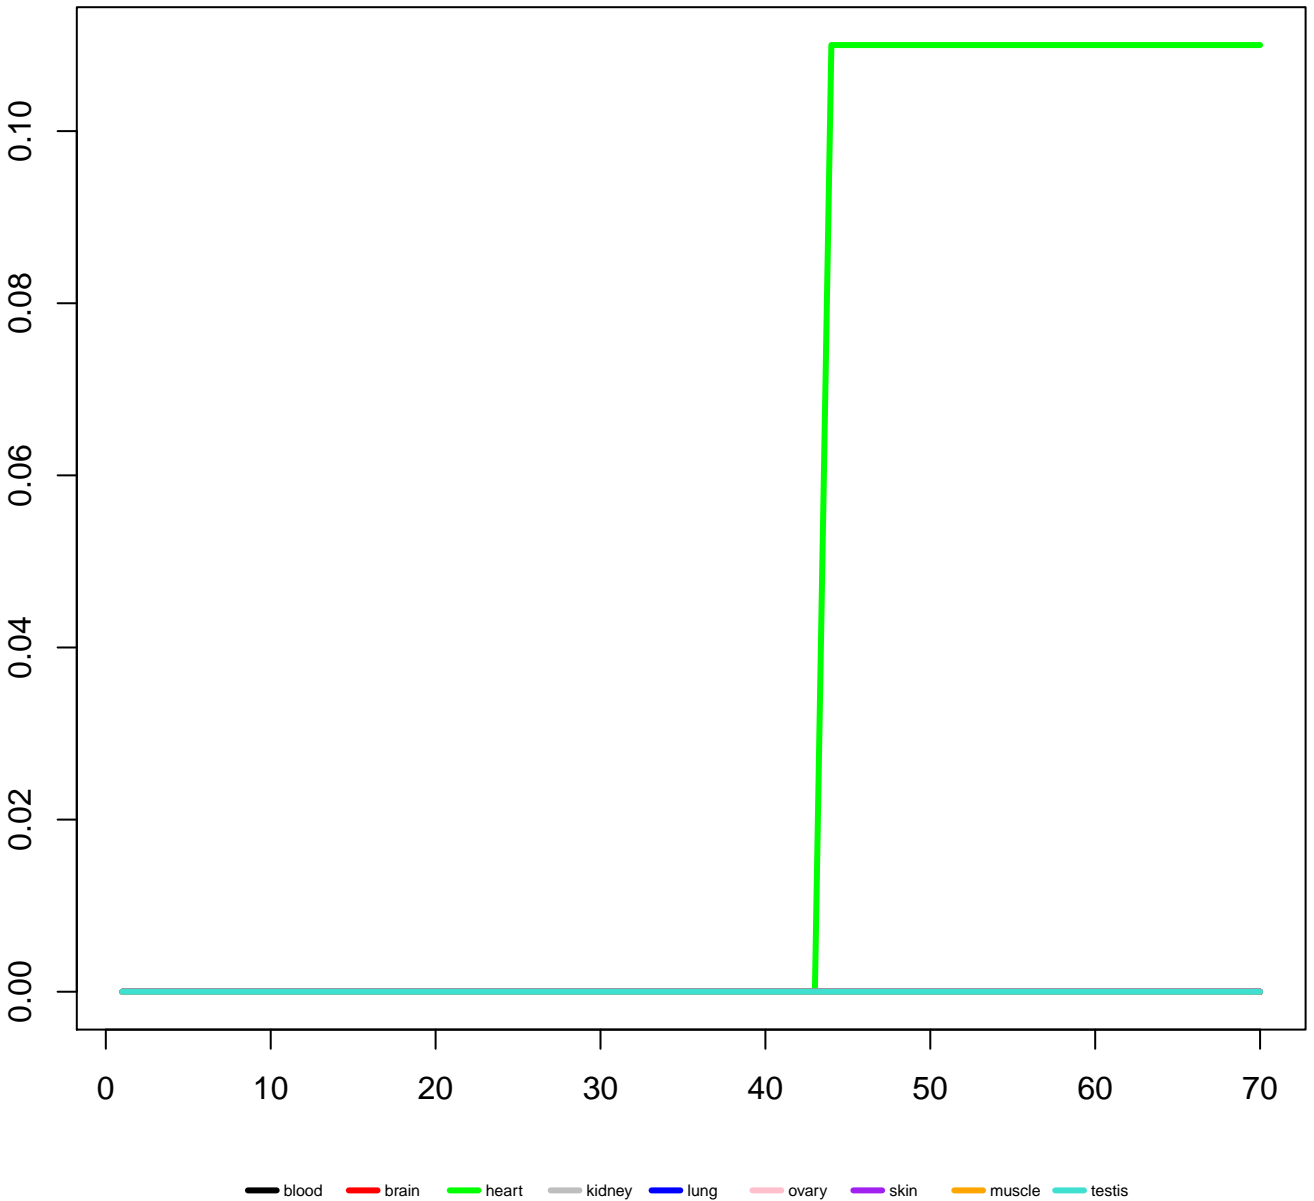

# 15\_15969633-15969706(+)\_mir-2414\_low



blood brain heart kidney lung ovary skin muscle testis

# 15\_26986548-26986676(+)\_cfa-mir-8838\_low

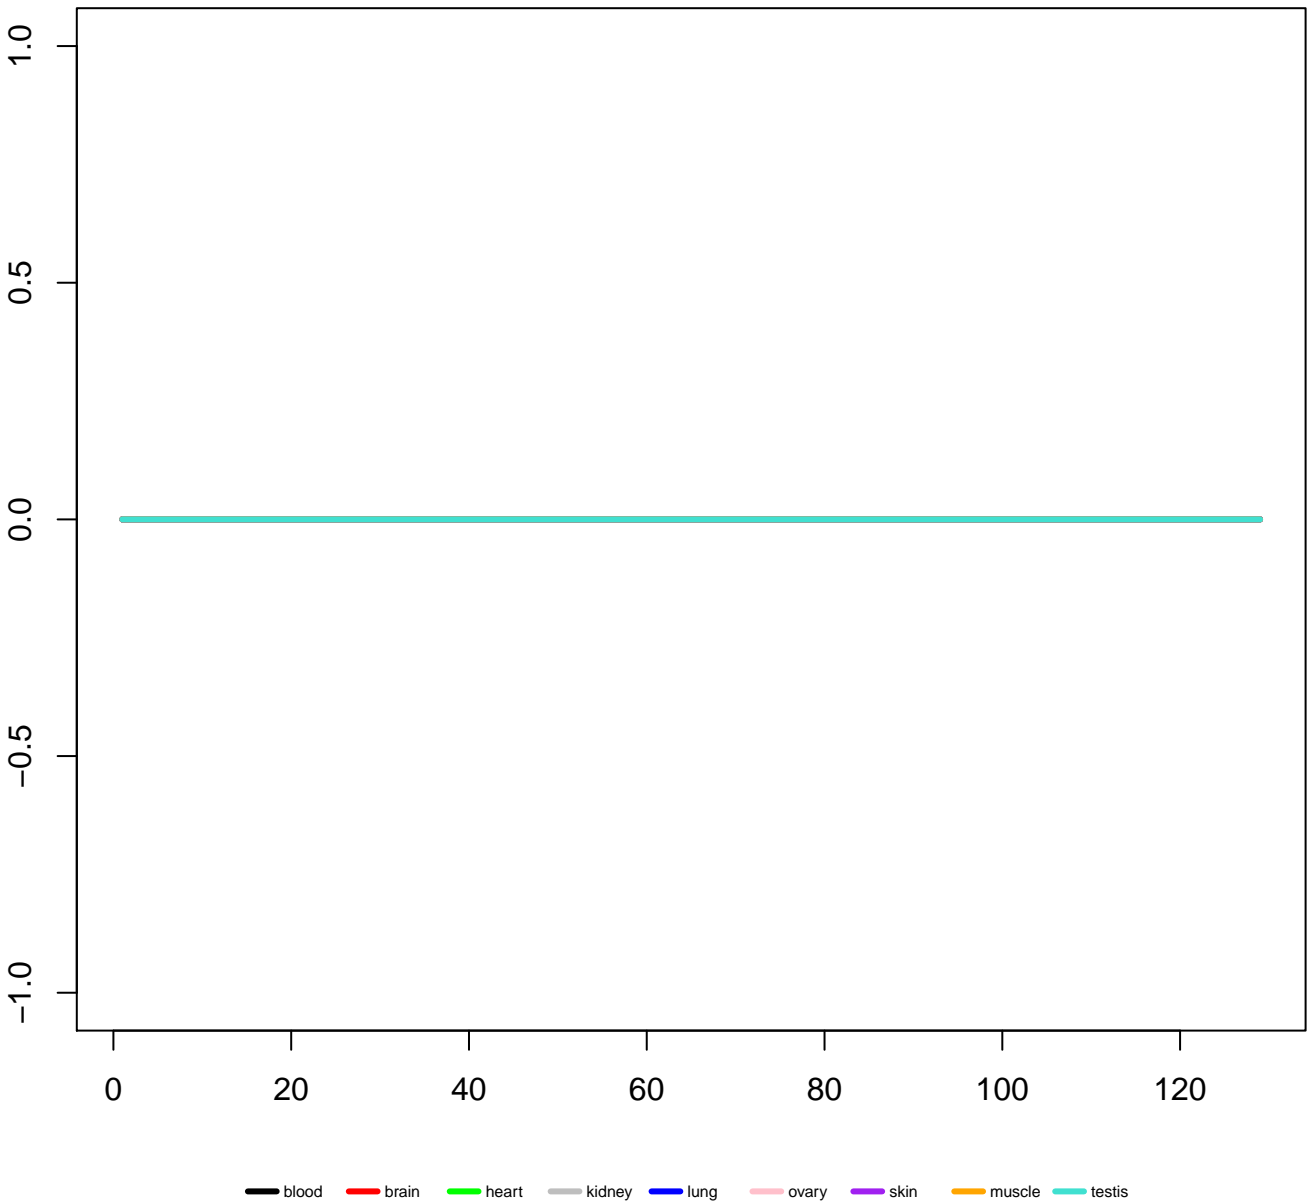





# 15\_32468976-32469120(-)\_cfa-mir-8840\_low



# 15\_35234750-35234839(+)\_cfa-mir-331\_high

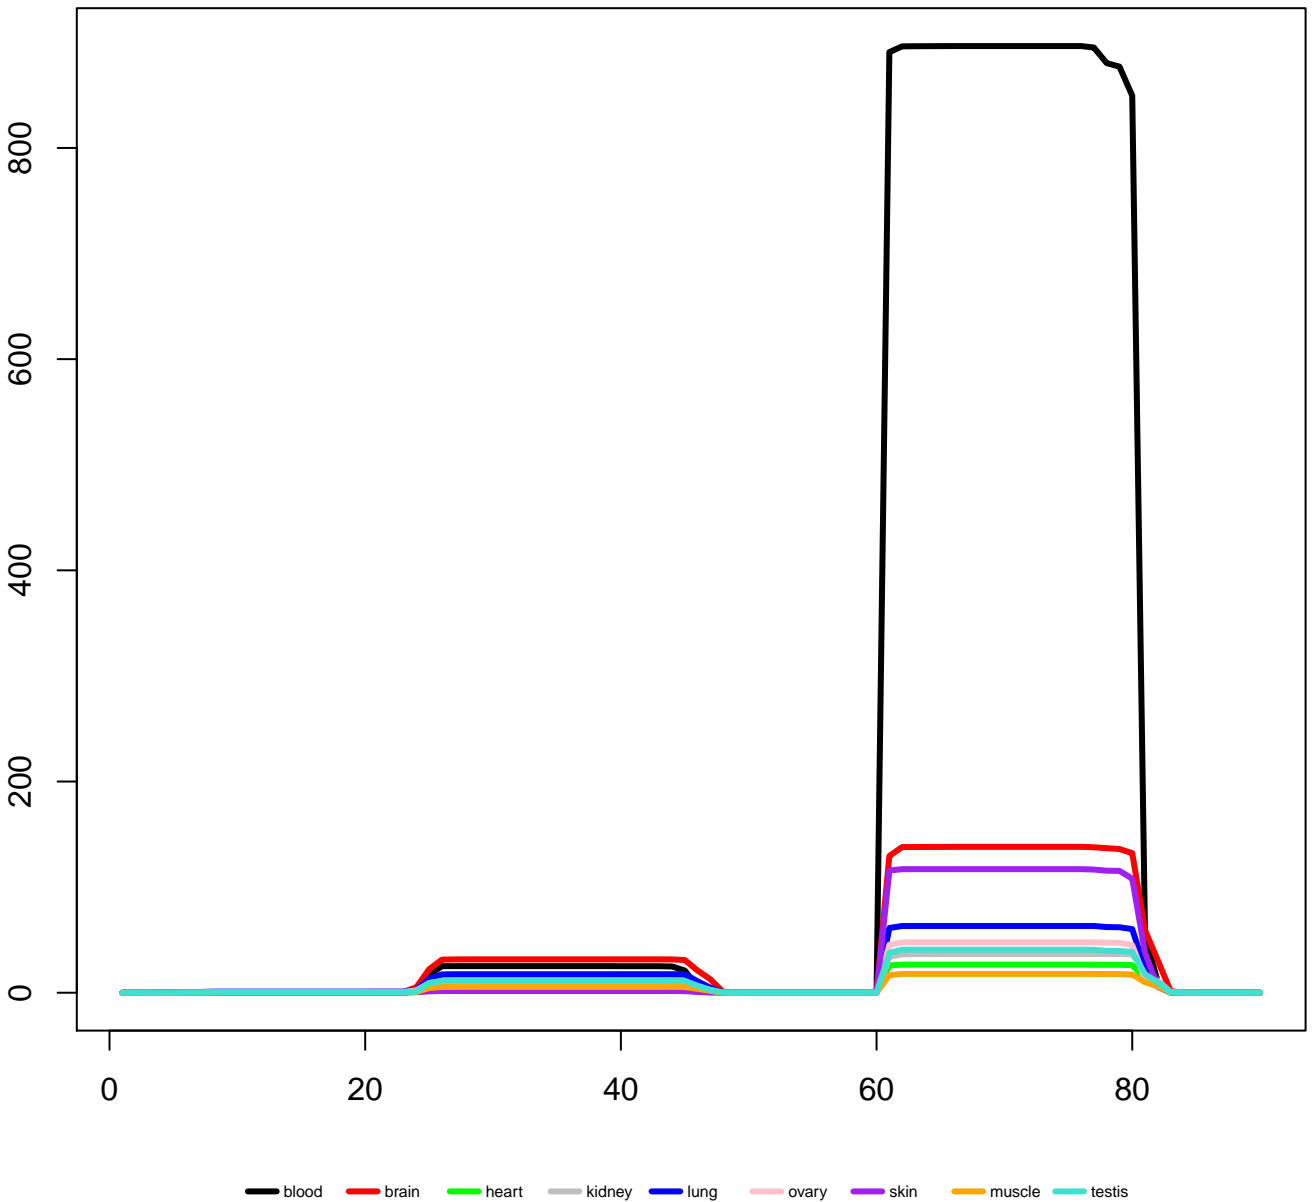





# 15\_39178848-39178958(-)\_cfa-mir-8837\_low

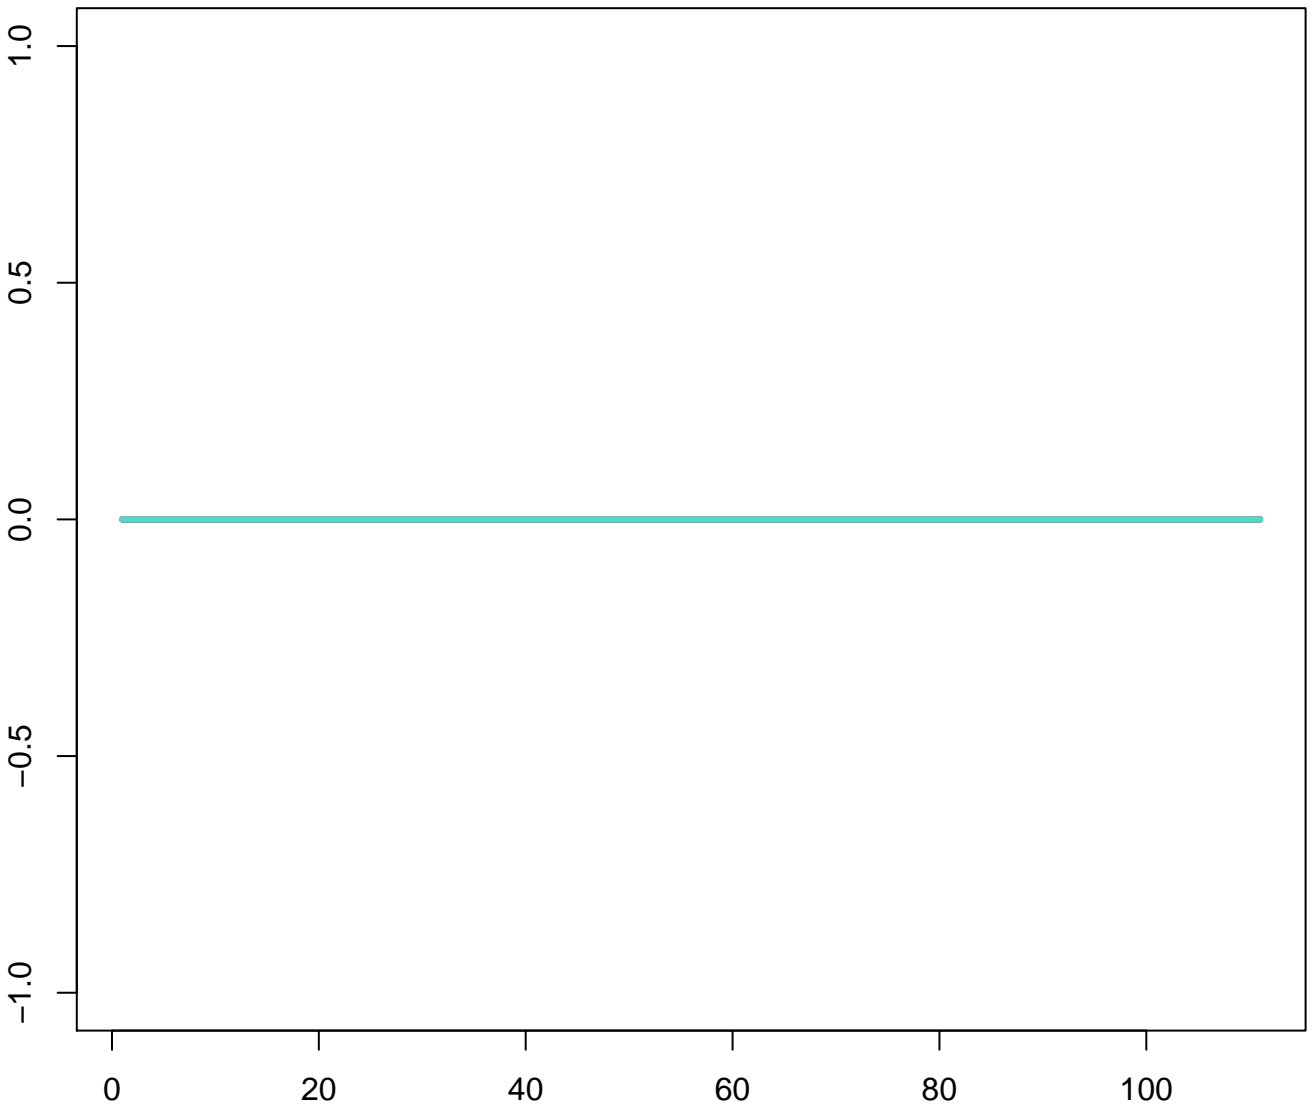

blood brain heart kidney lung ovary skin muscle testis

# 15\_54704749-54704840(+)\_mir-2985\_low

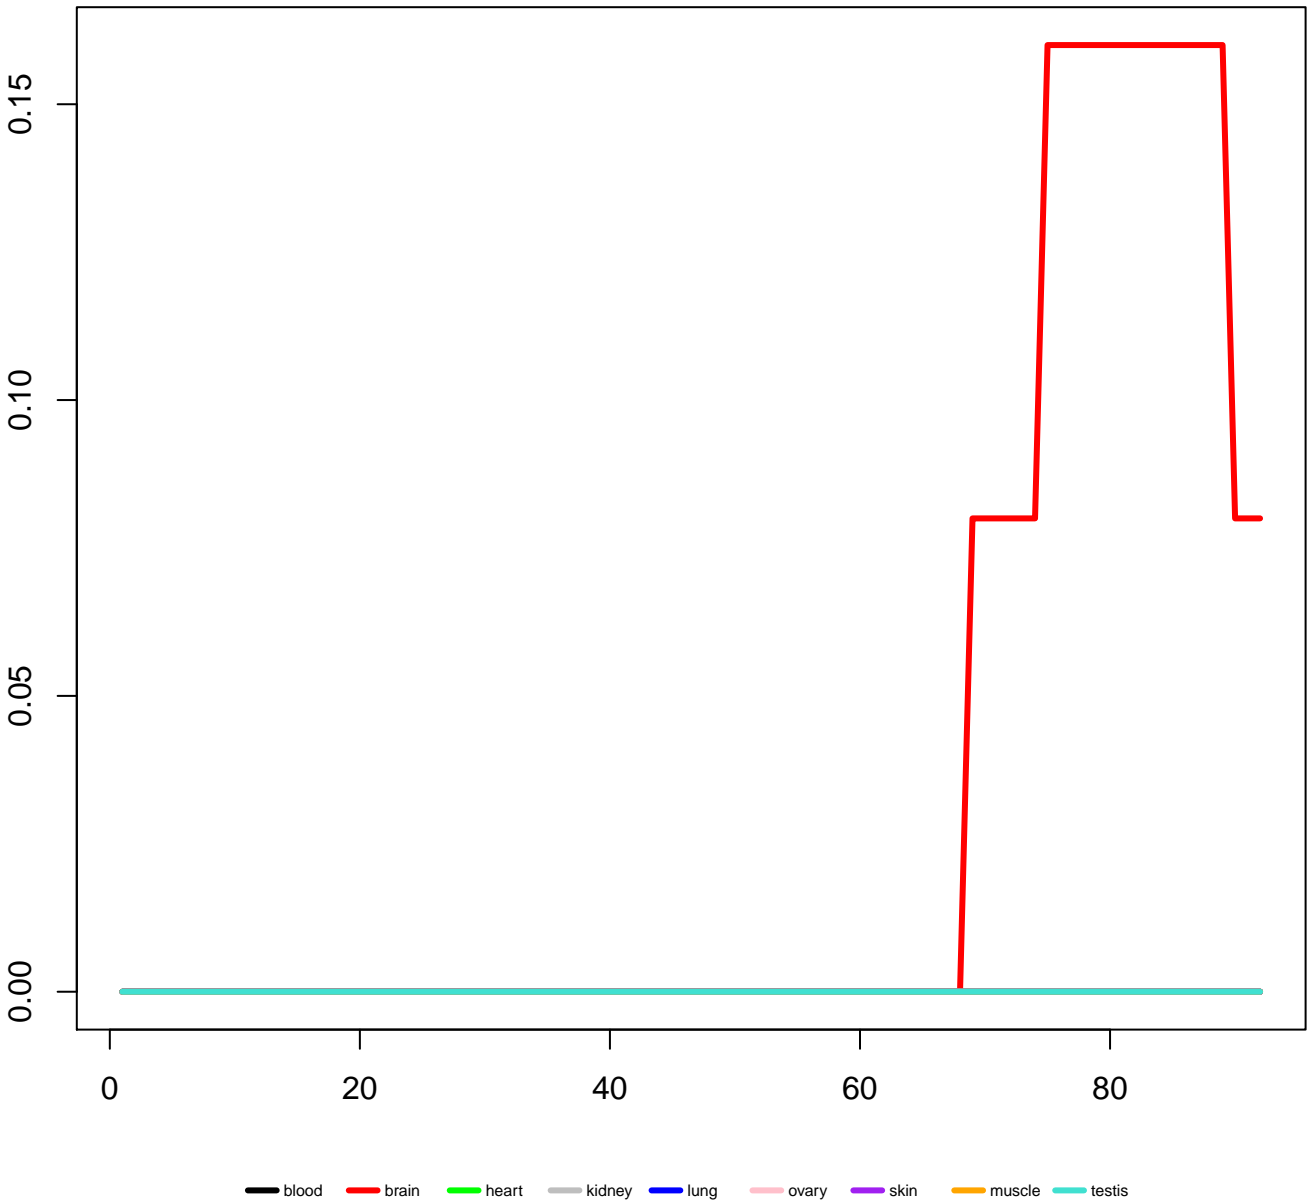

# 15\_58855306-58855389(+)\_mir-147\_high

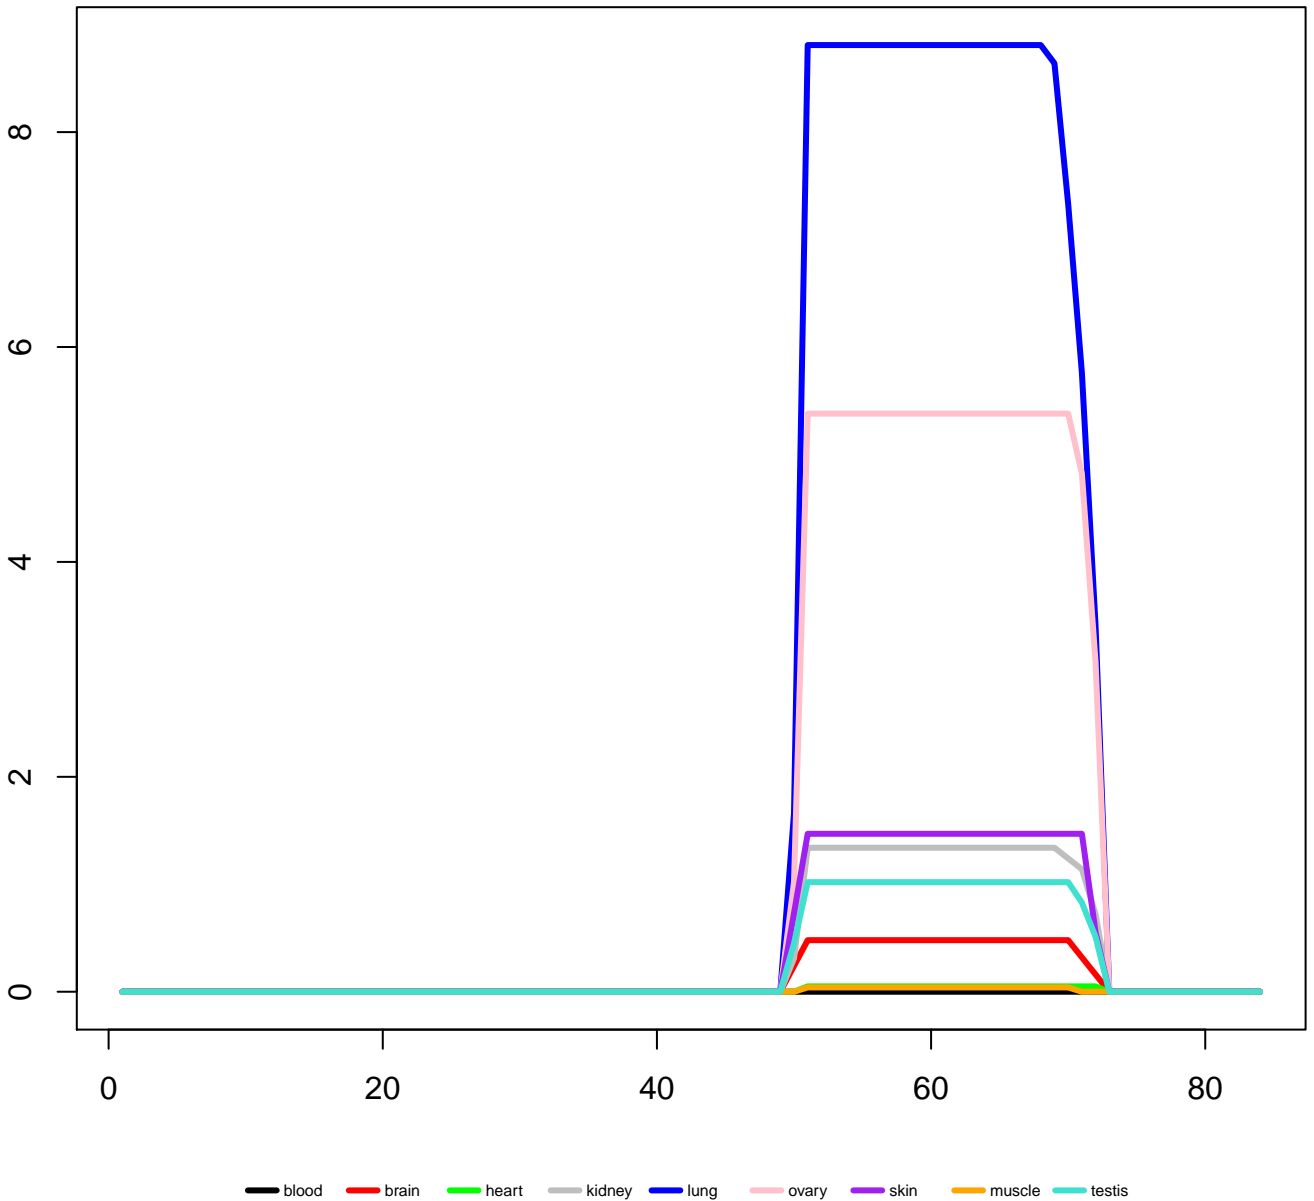



# 16\_1101349-1101493(-)\_cfa-mir-8862\_low

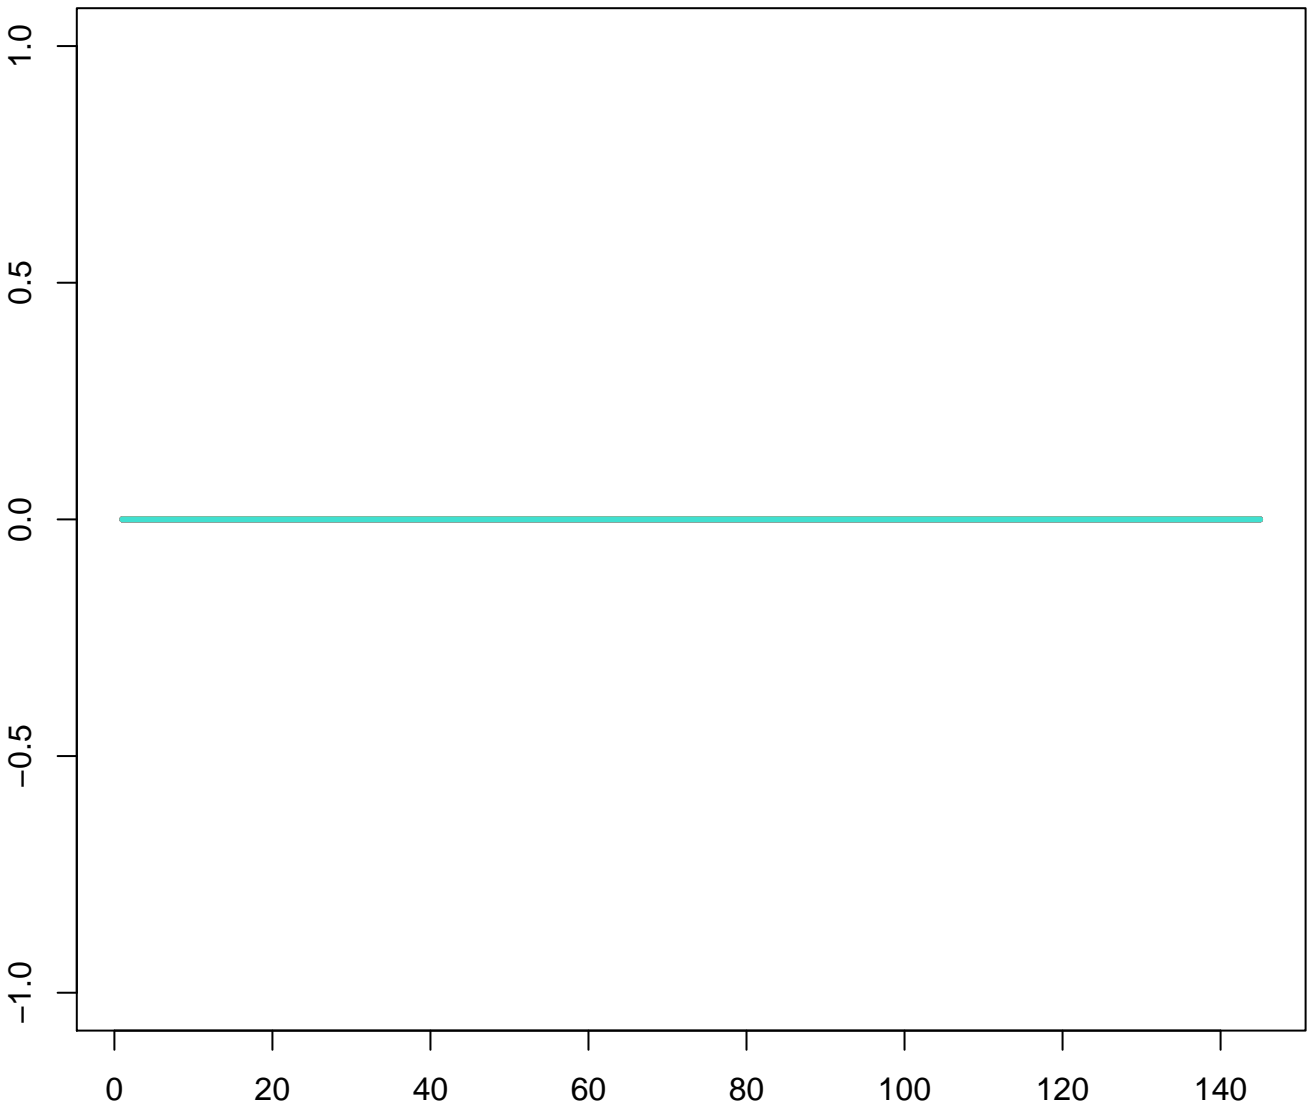

blood brain heart kidney lung ovary skin muscle testis

# 16\_1148170-1148314(-)\_cfa-mir-8852\_low

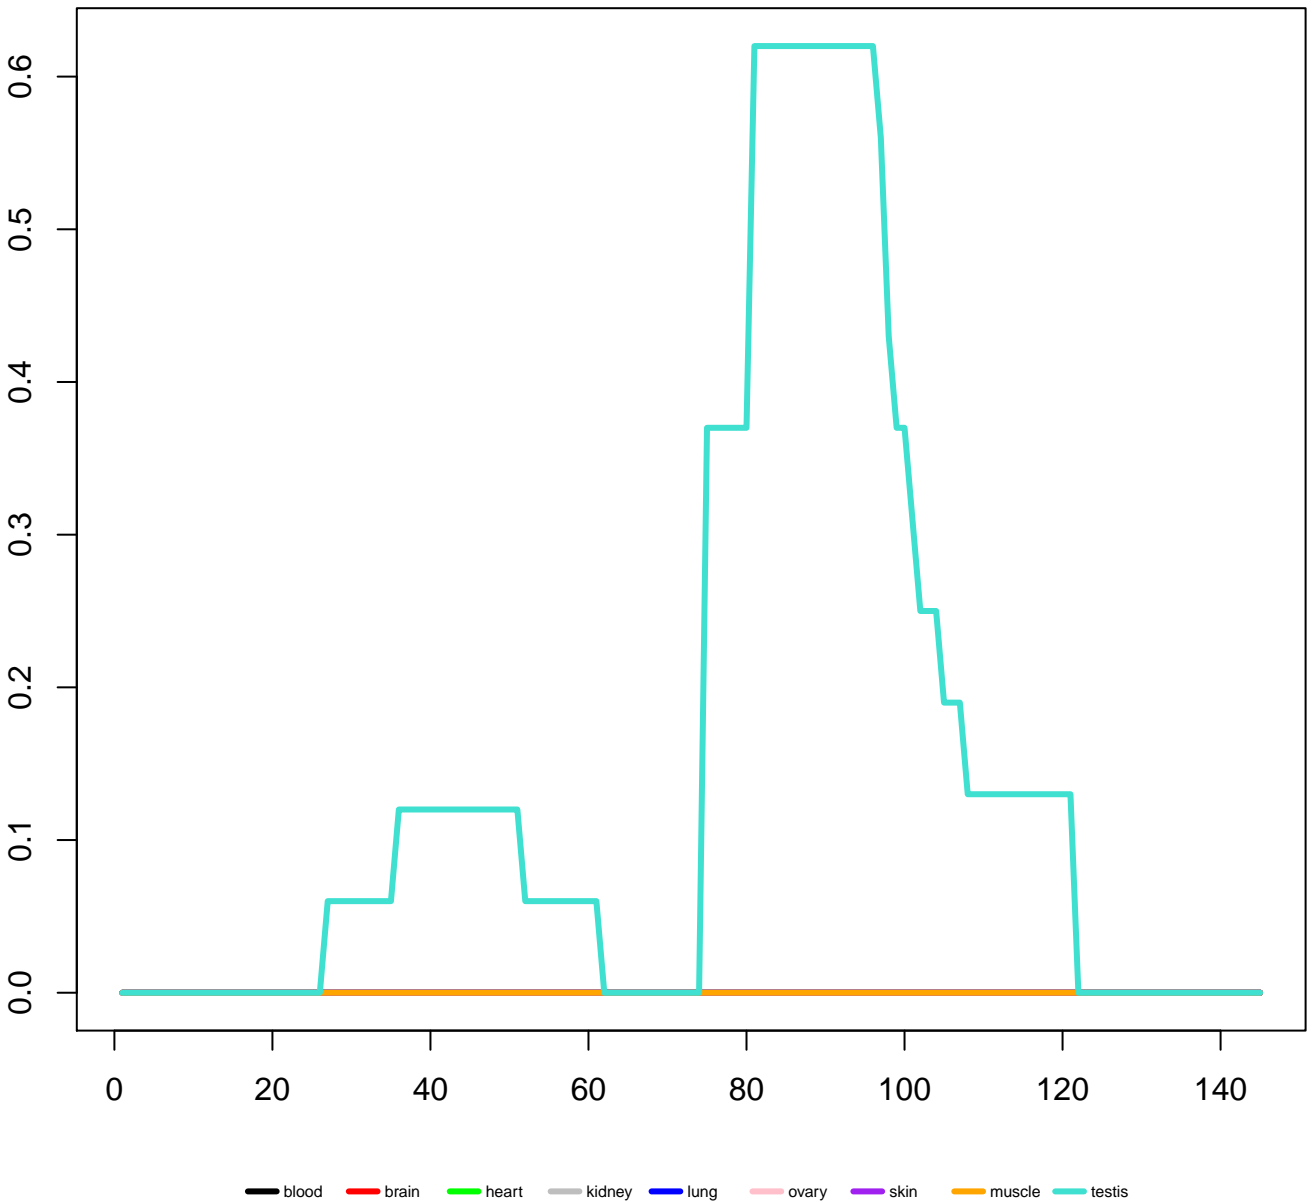

# 16\_1275336-1275468(+)\_cfa-mir-8853\_low

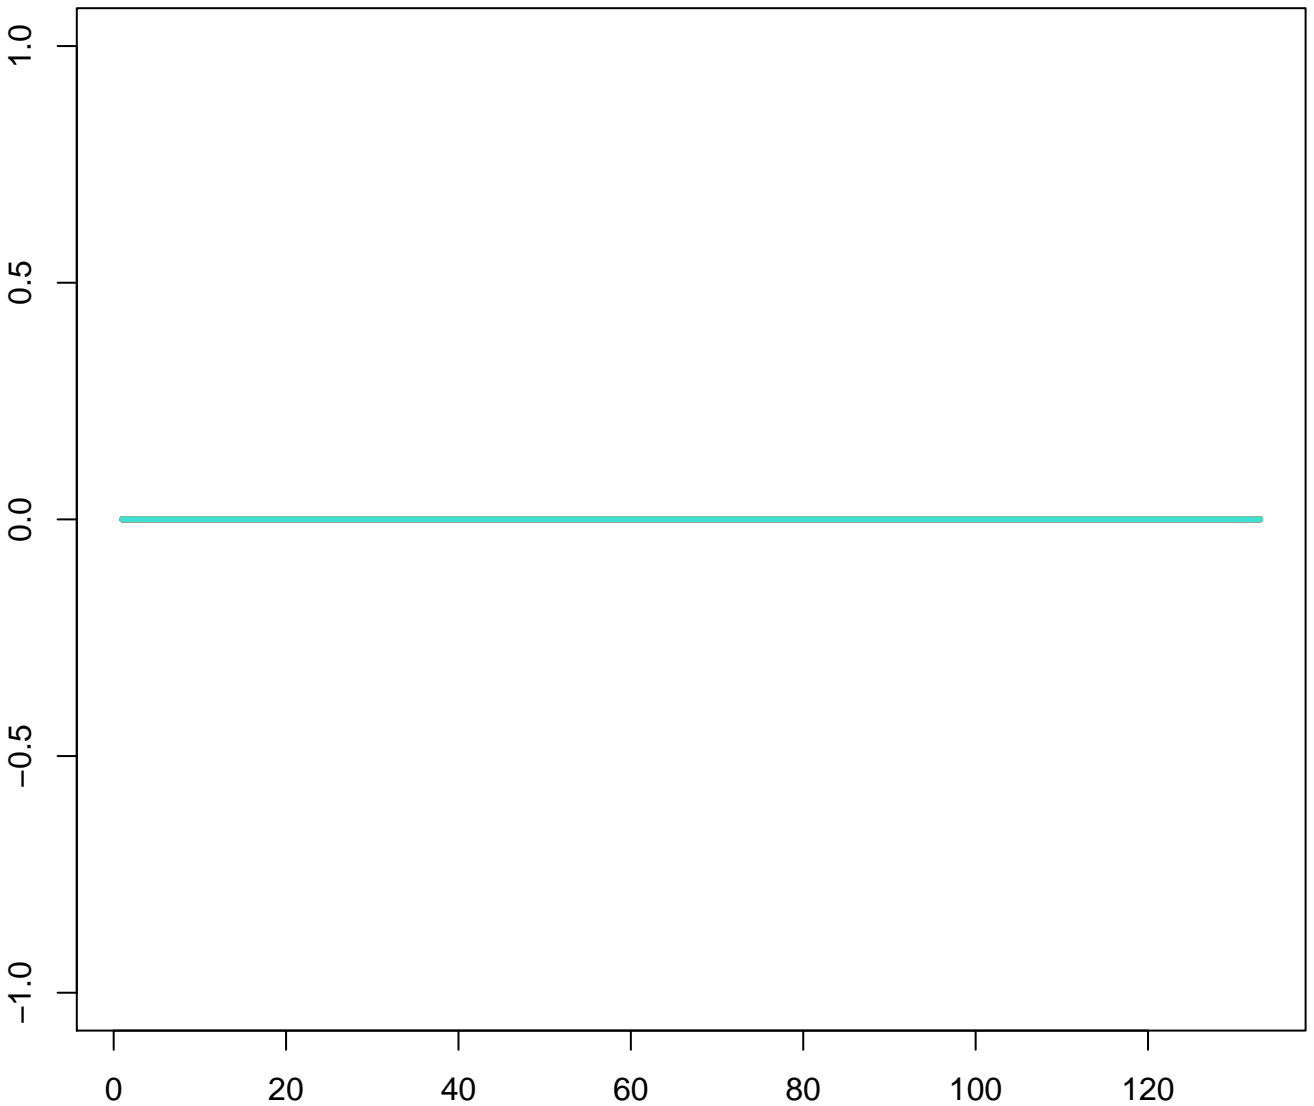

blood brain heart kidney lung ovary skin muscle testis

# 16\_1707011-1707115(+)\_cfa-mir-8793-1\_low

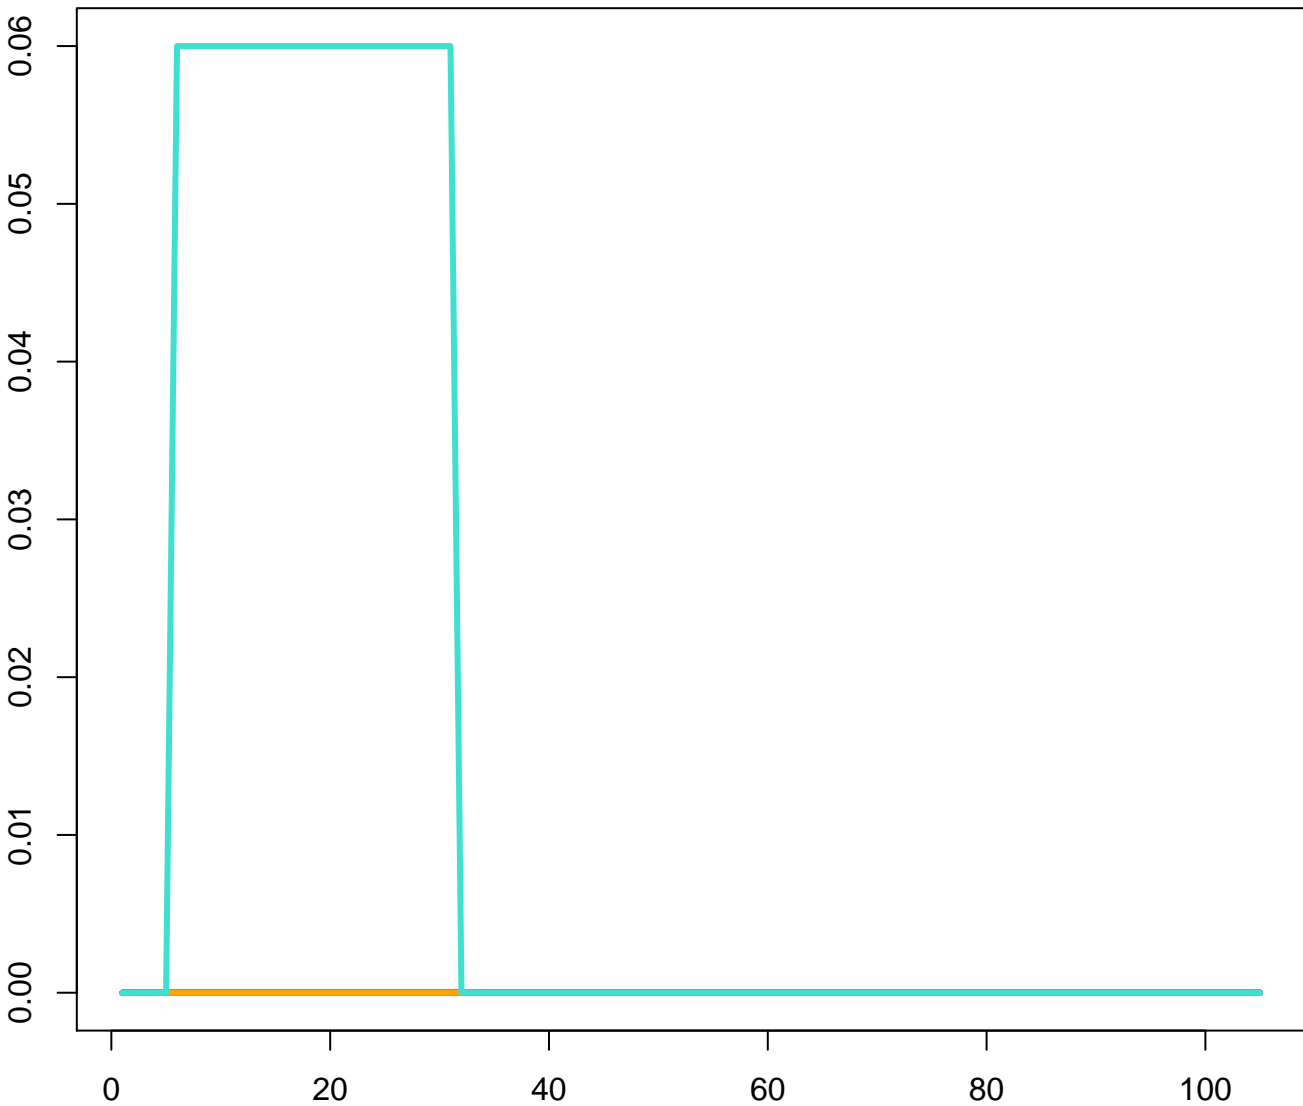

— blood — brain — heart — kidney — lung — ovary — skin — muscle — testis

# 16\_1725693-1725780(+)\_mir-8907\_low

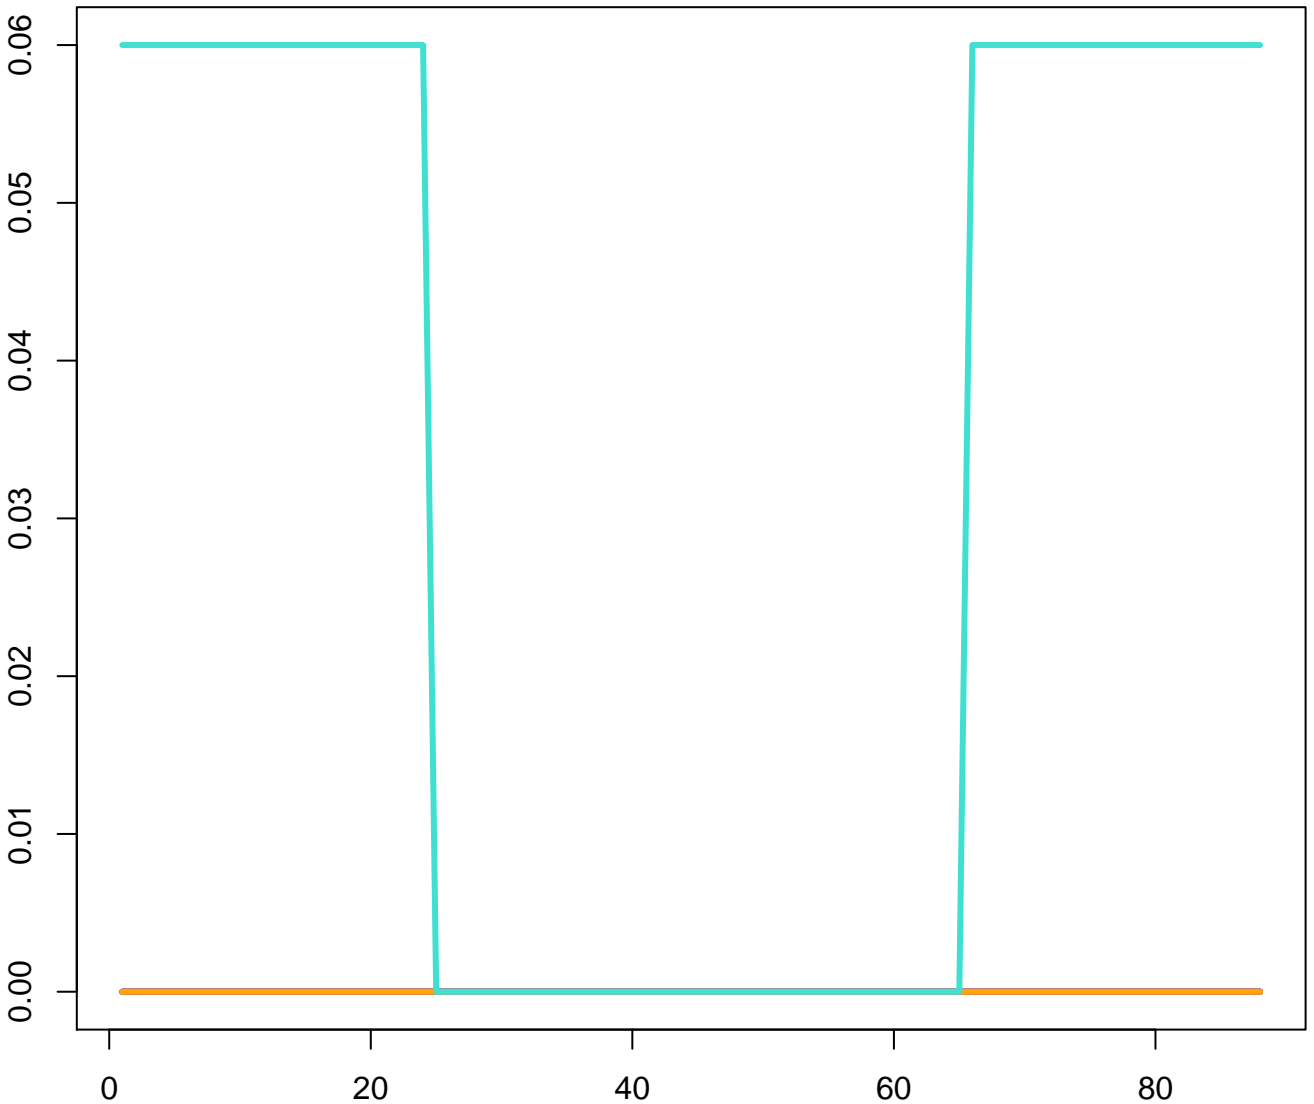

blood brain heart kidney lung ovary skin muscle testis

# 16\_1728901-1729013(+)\_mir-8794\_low

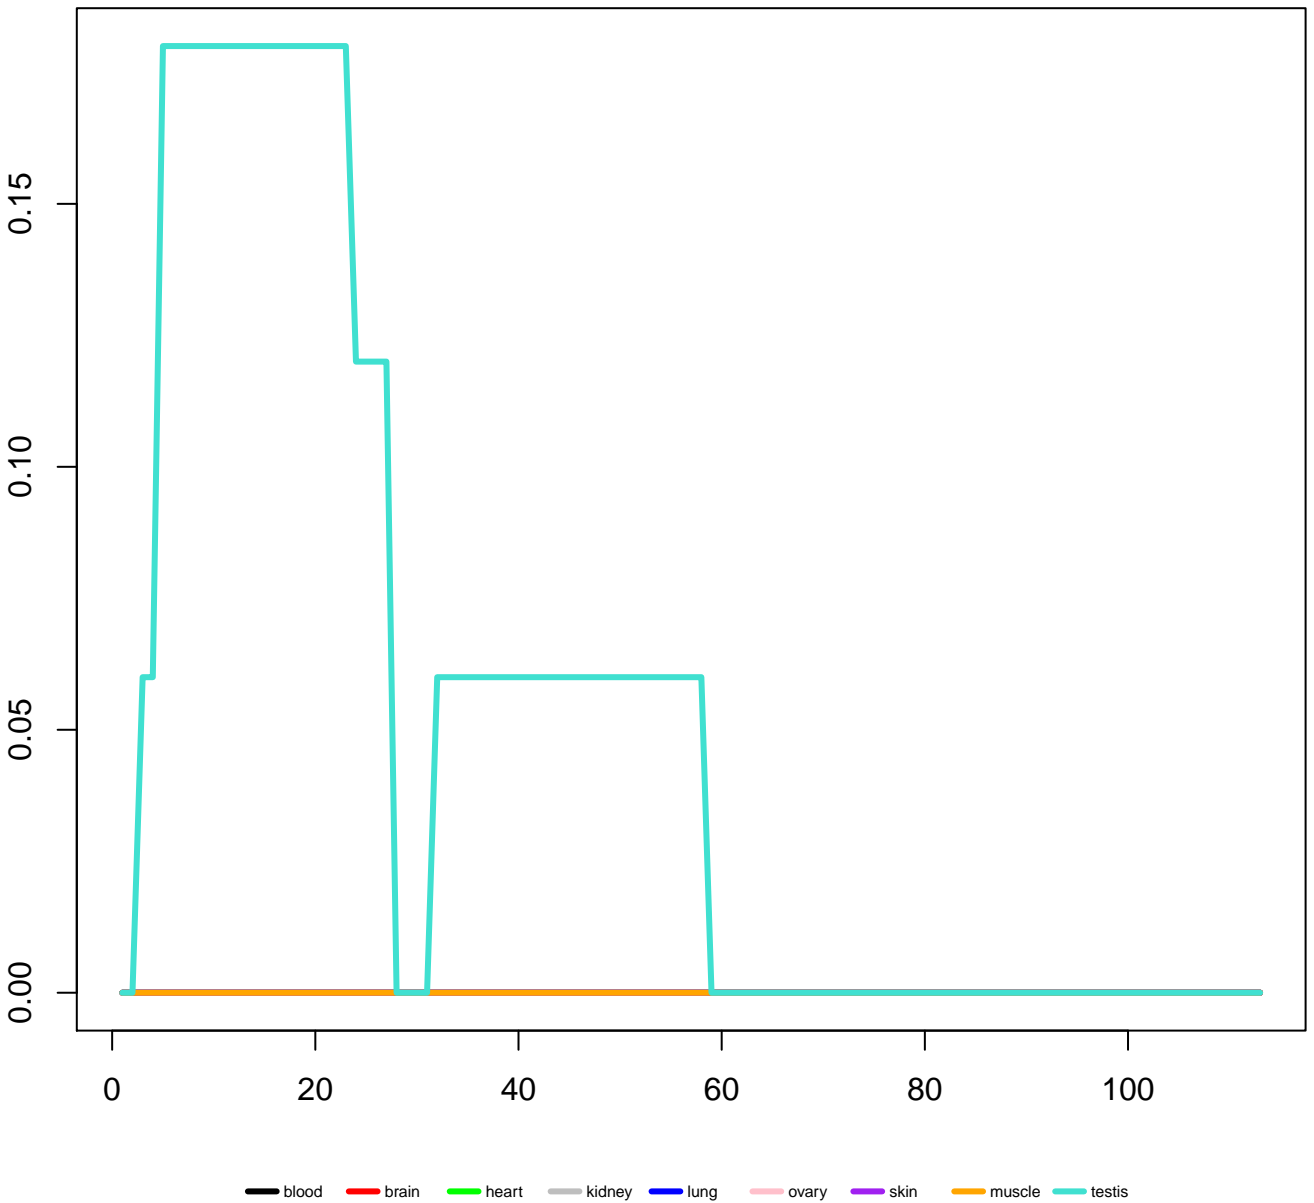

# 16\_10434119-10434231(-)\_cfa-mir-8794-1\_low

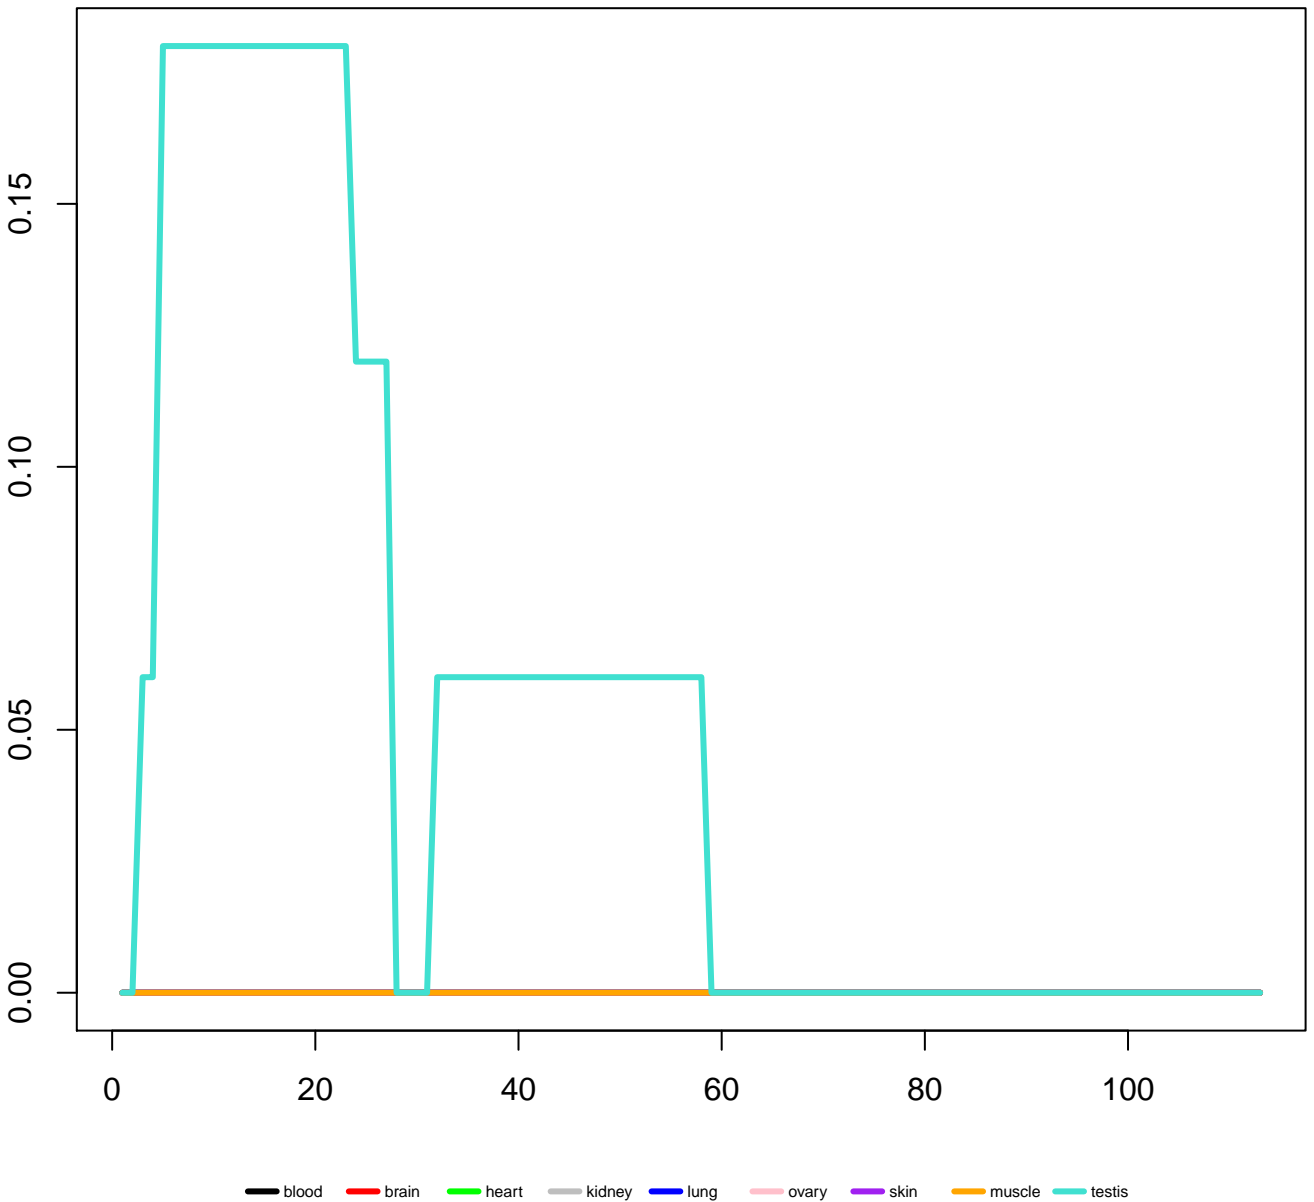

# 16\_10437283-10437411(-)\_cfa-mir-8907\_low

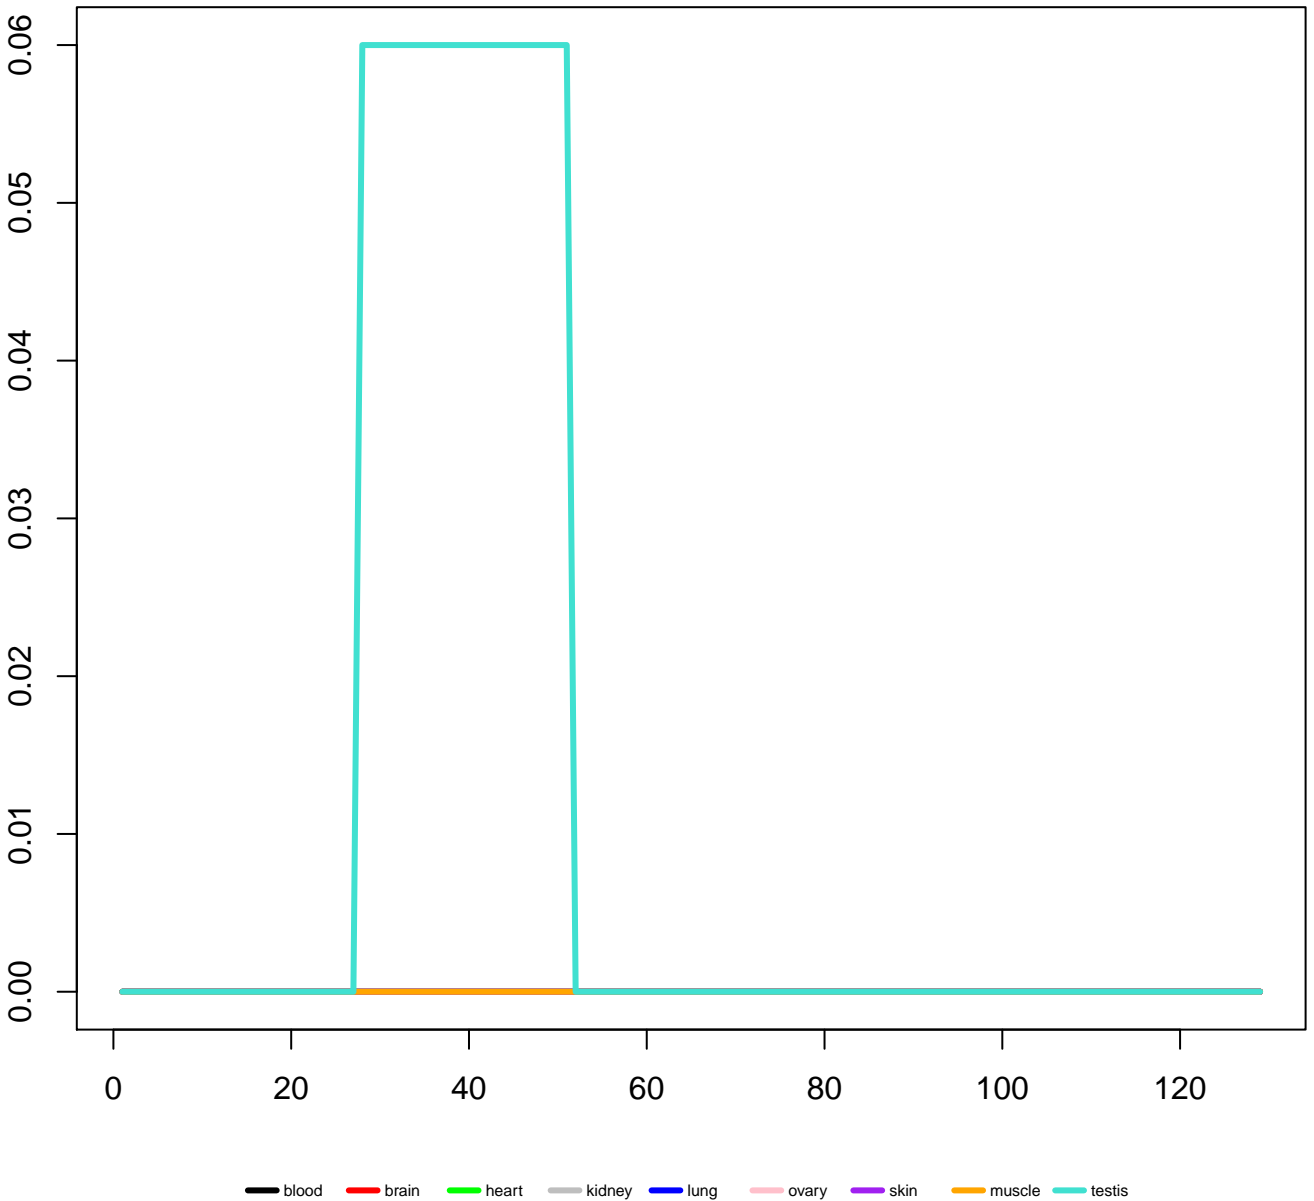



# 16\_10452169-10452273(-)\_cfa-mir-8793-2\_low

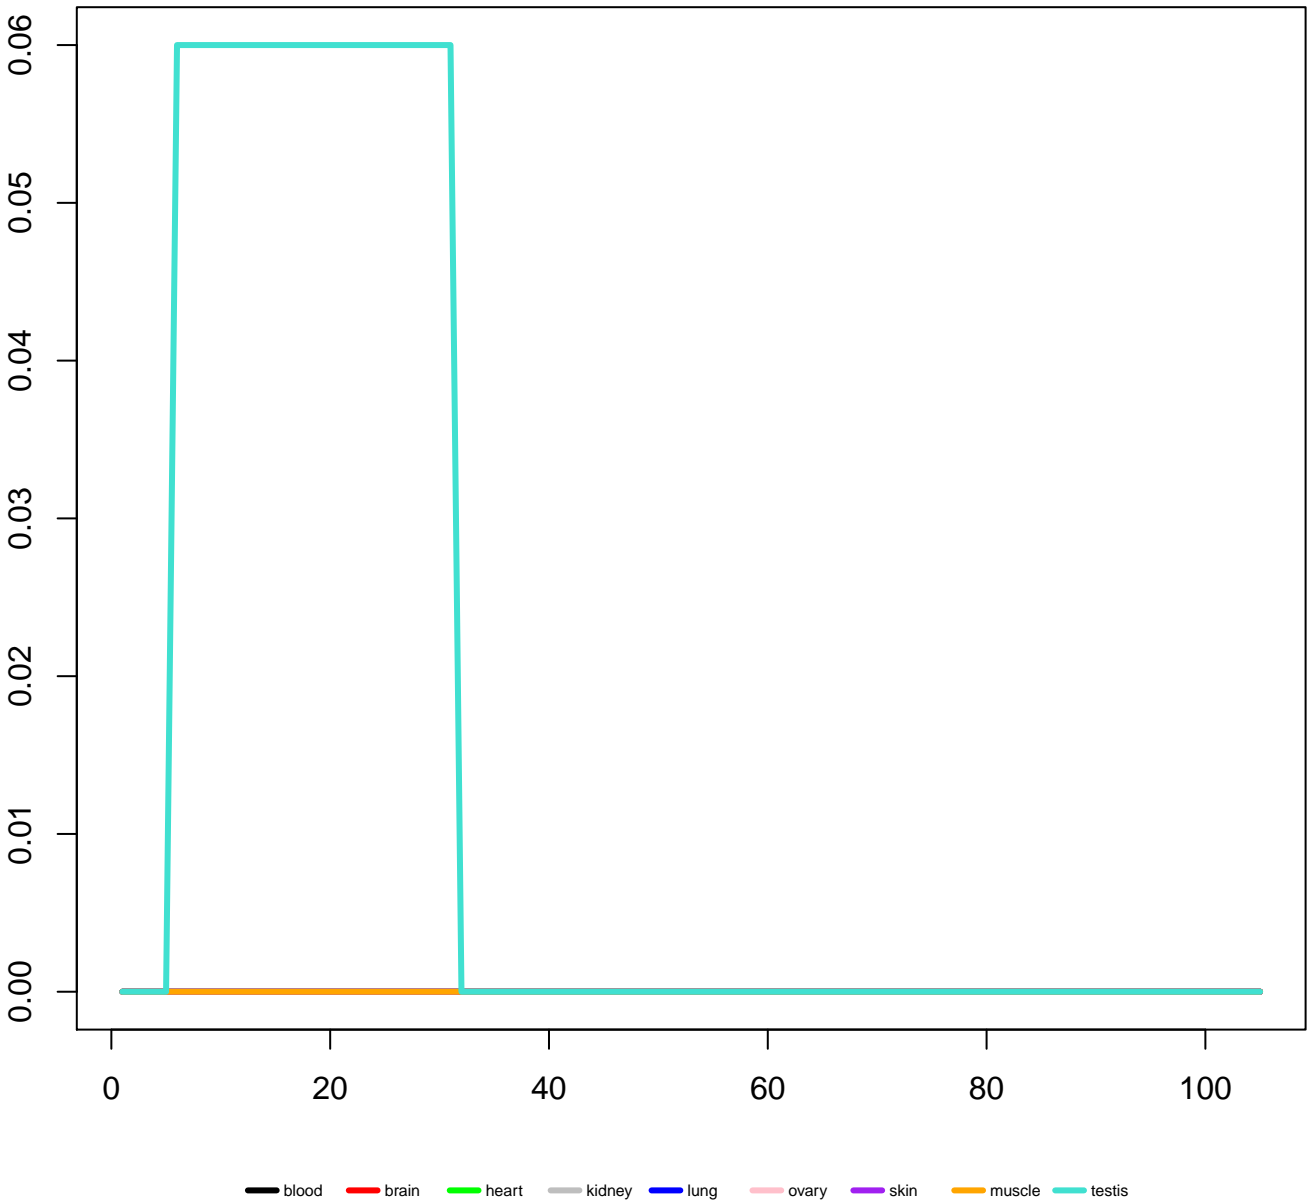

# 16\_11628312-11628392(-)\_cfa-mir-490\_high

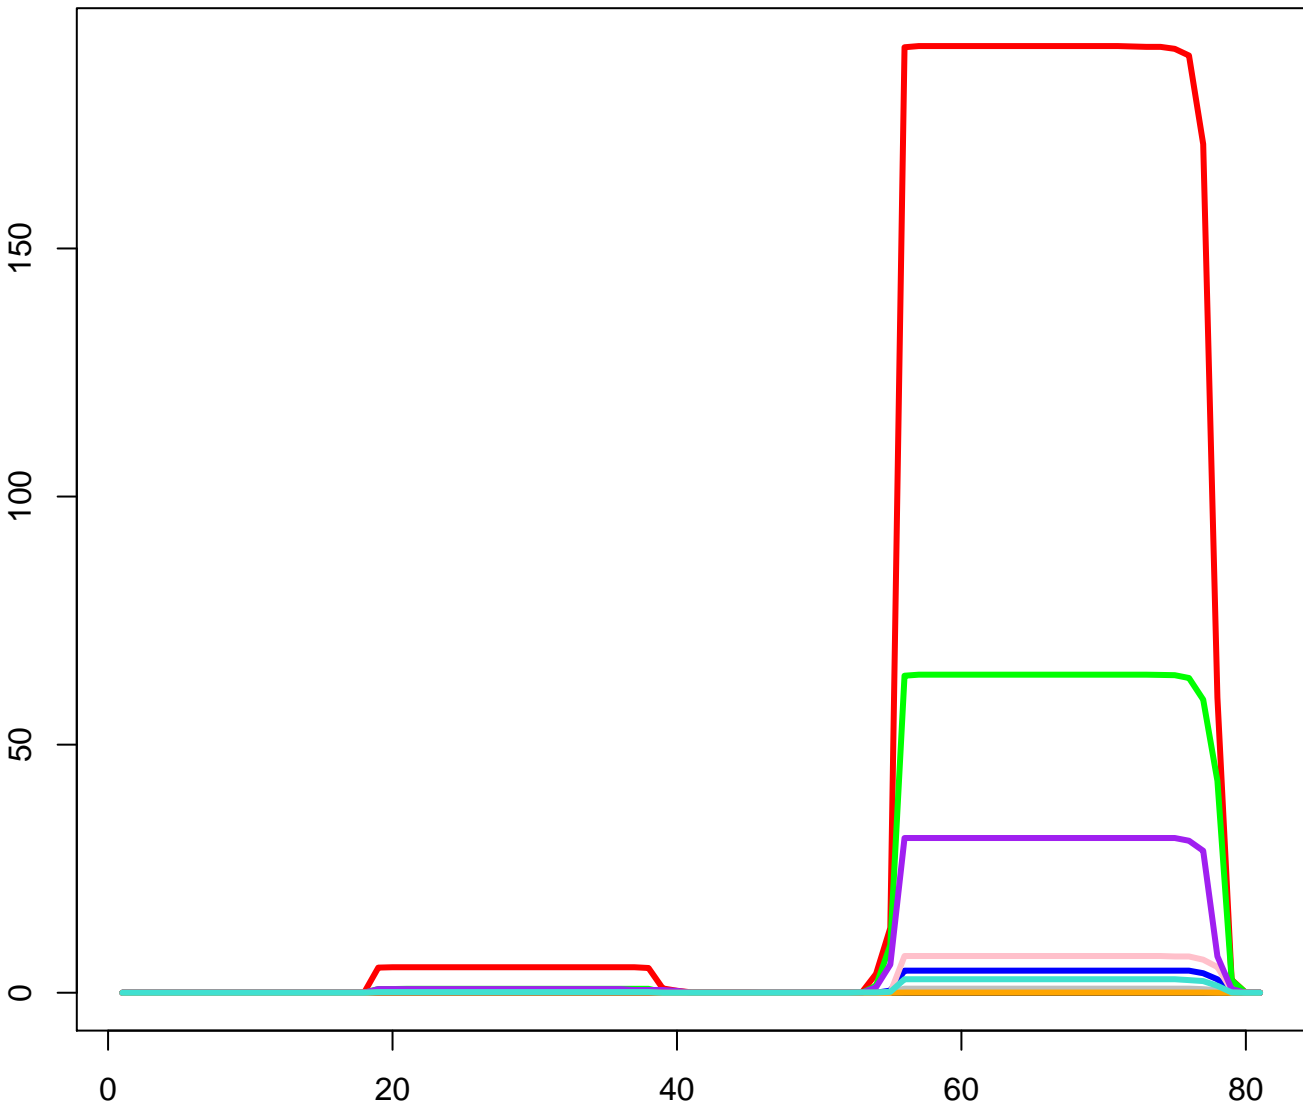

— blood — brain — heart — kidney — lung — ovary — skin — muscle — testis

# 16\_12928966-12929066(+)\_cfa-mir-8847\_low

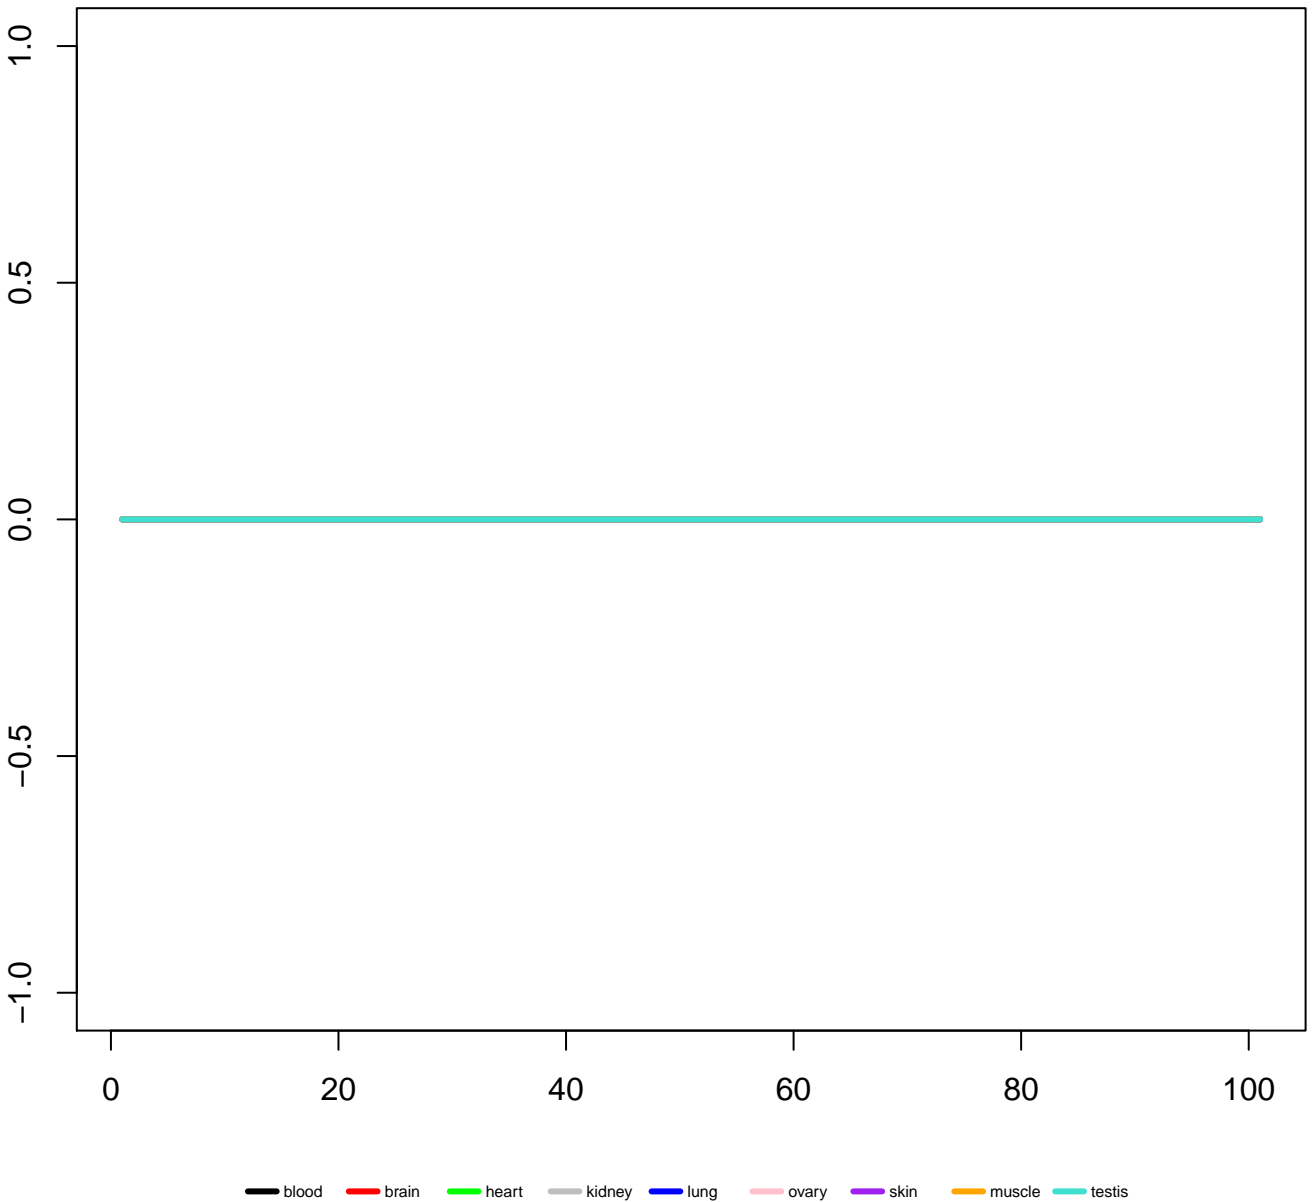

# 16\_13901238-13901350(+)\_cfa-mir-8794-2\_low



# 16\_13916150-13916284(+)\_cfa-mir-8906\_low

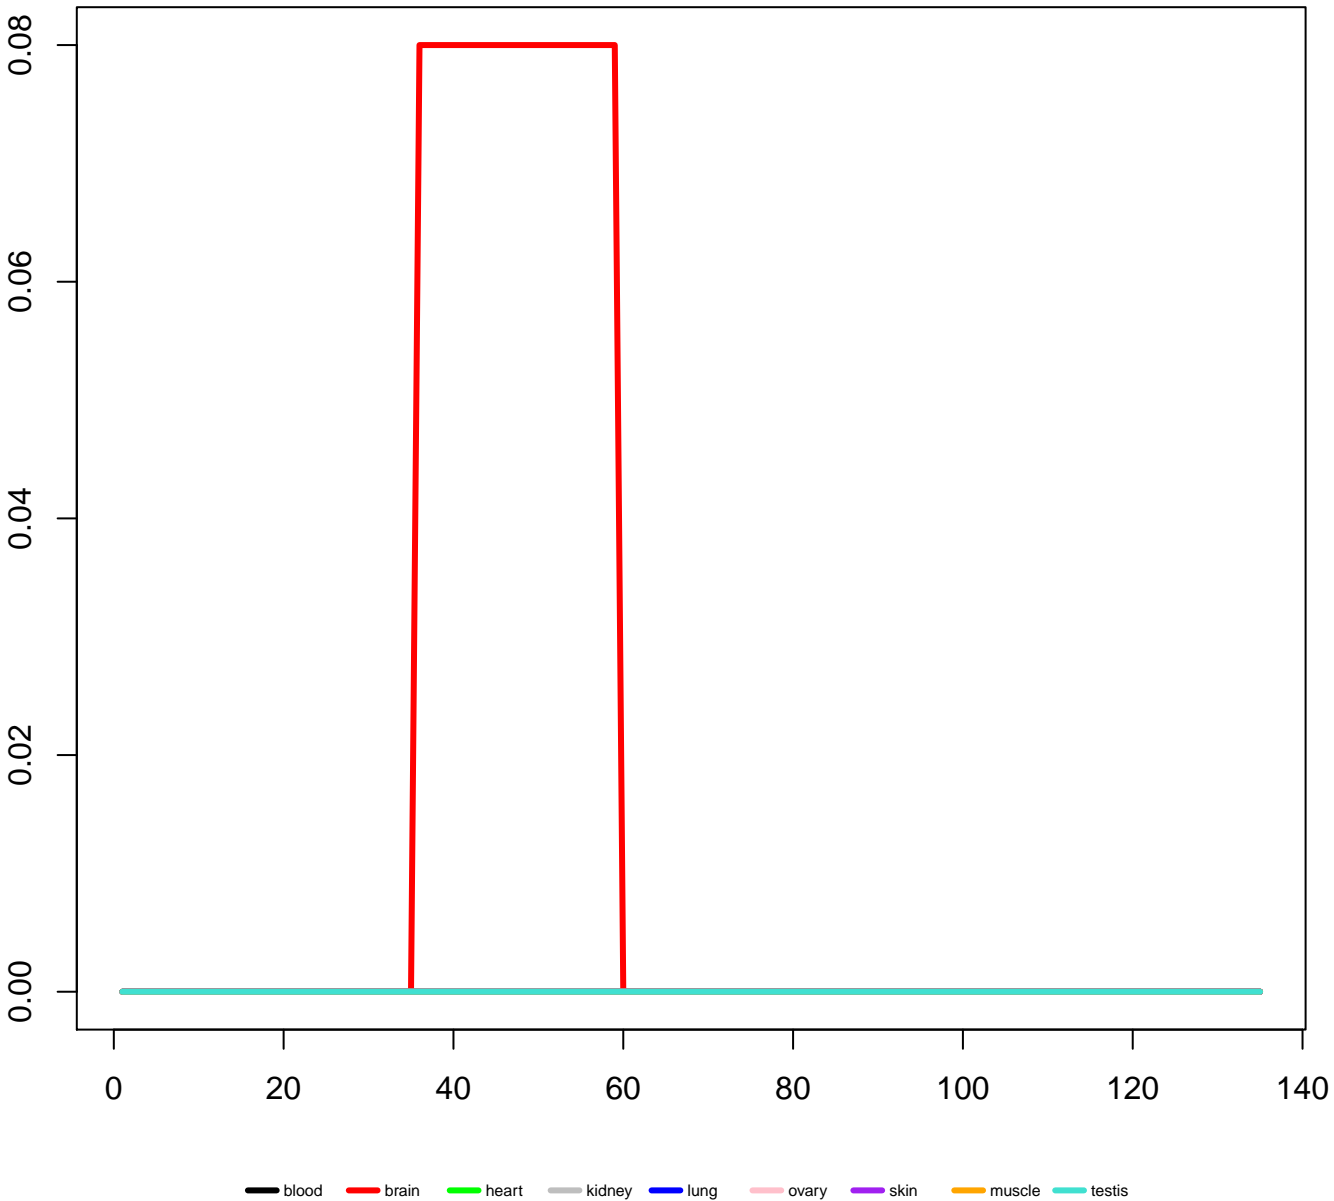

# 16\_13946165-13946269(+)\_cfa-mir-8793-3\_low



# 16\_13954683-13954777(+)\_cfa-mir-8849\_low

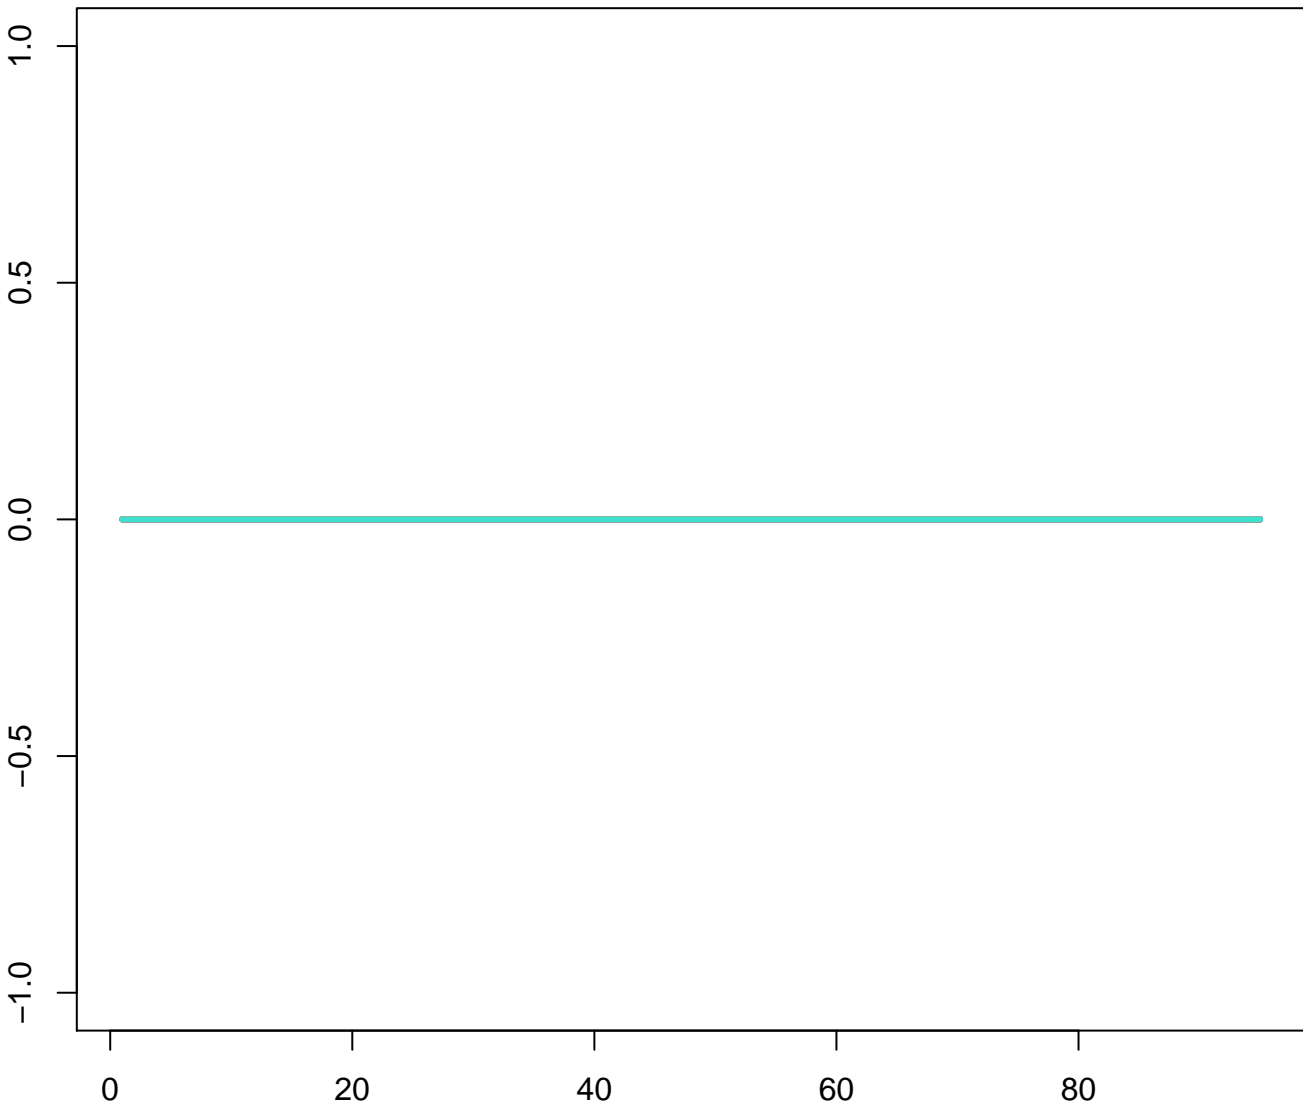

blood brain heart kidney lung ovary skin muscle testis





# 16\_13973805-13973916(+)\_cfa-mir-8863\_low

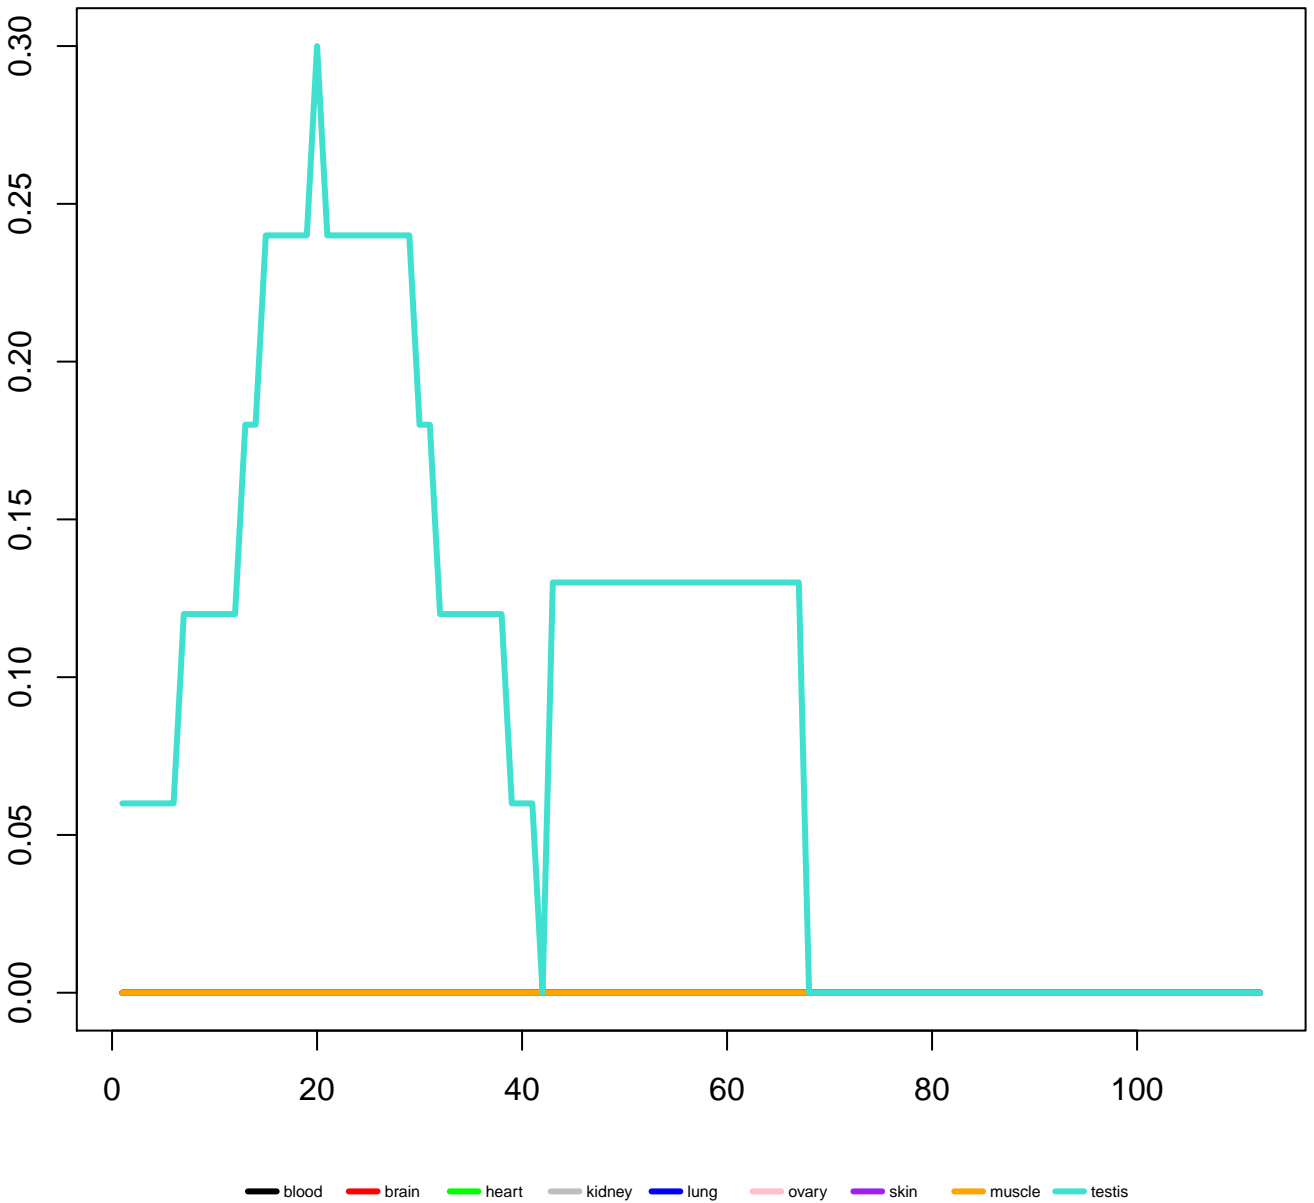

# 16\_15278782-15278855(+)\_cfa-mir-671\_high

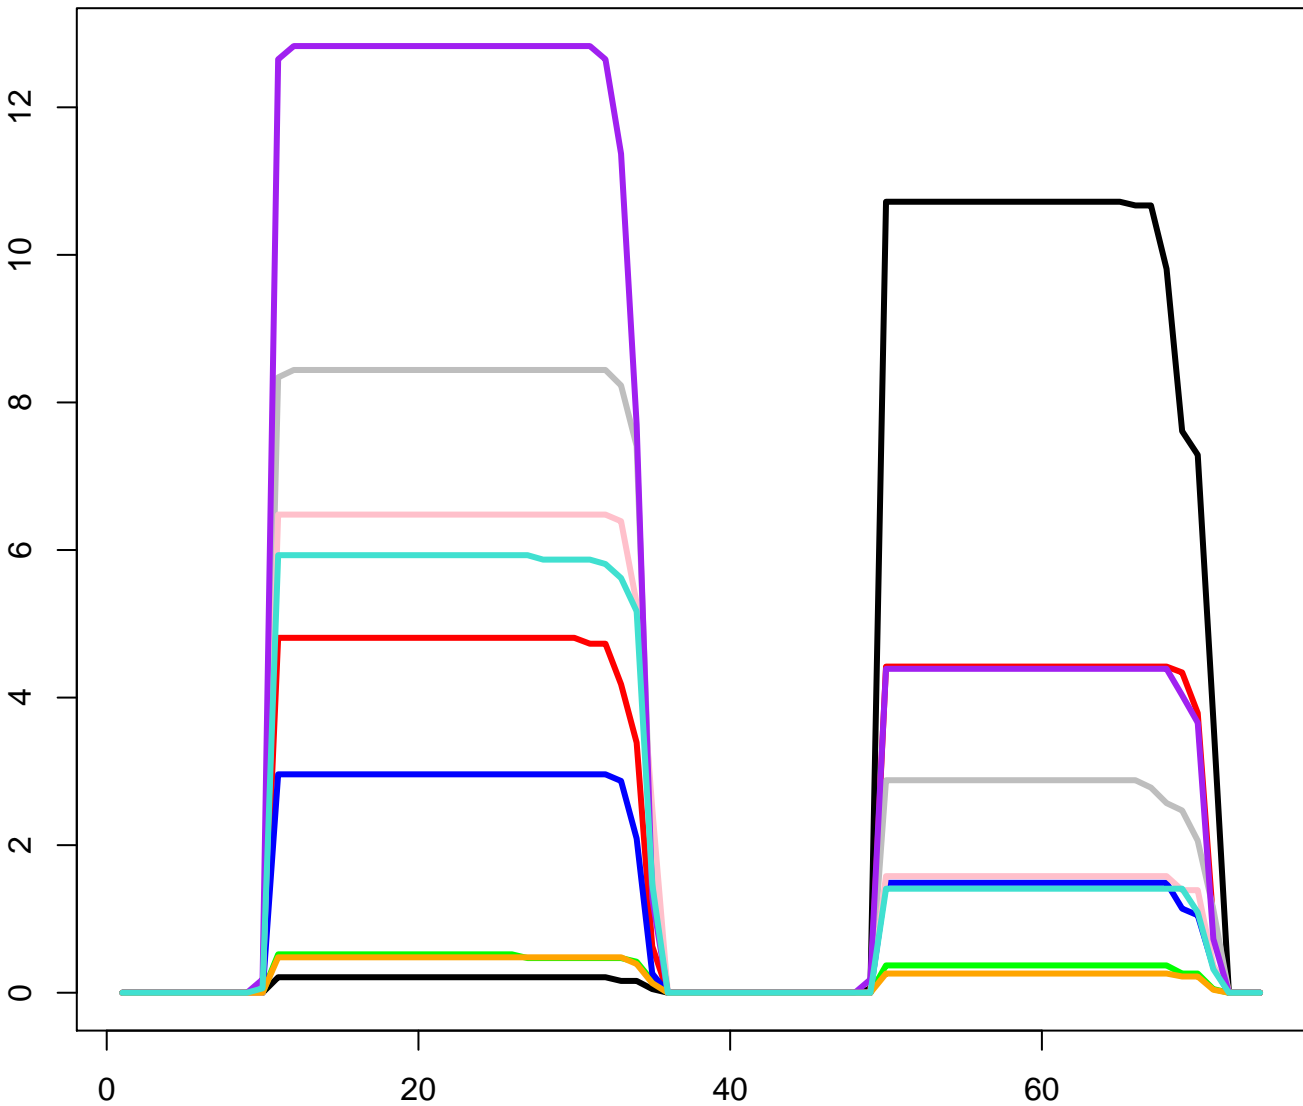

— blood — brain — heart — kidney — lung — ovary — skin — muscle — testis

# 16\_15641487-15641631(-)\_cfa-mir-8855\_low



# 16\_17313541-17313661(+)\_cfa-mir-8850\_low

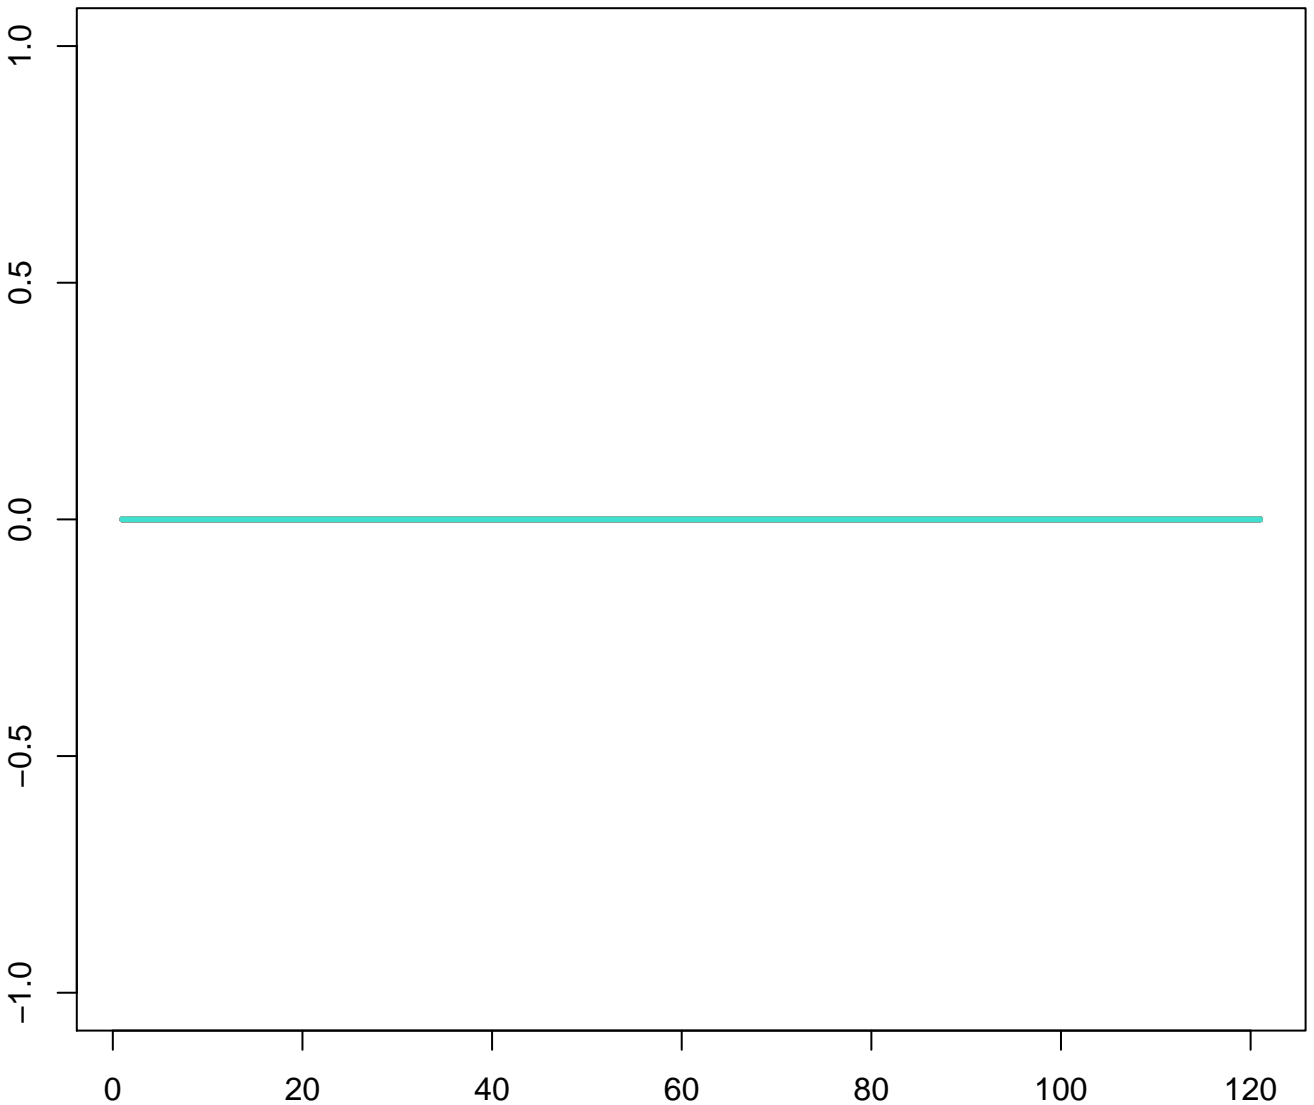

blood brain heart kidney lung ovary skin muscle testis

# 16\_17324652-17324754(+)\_cfa-mir-8851\_low

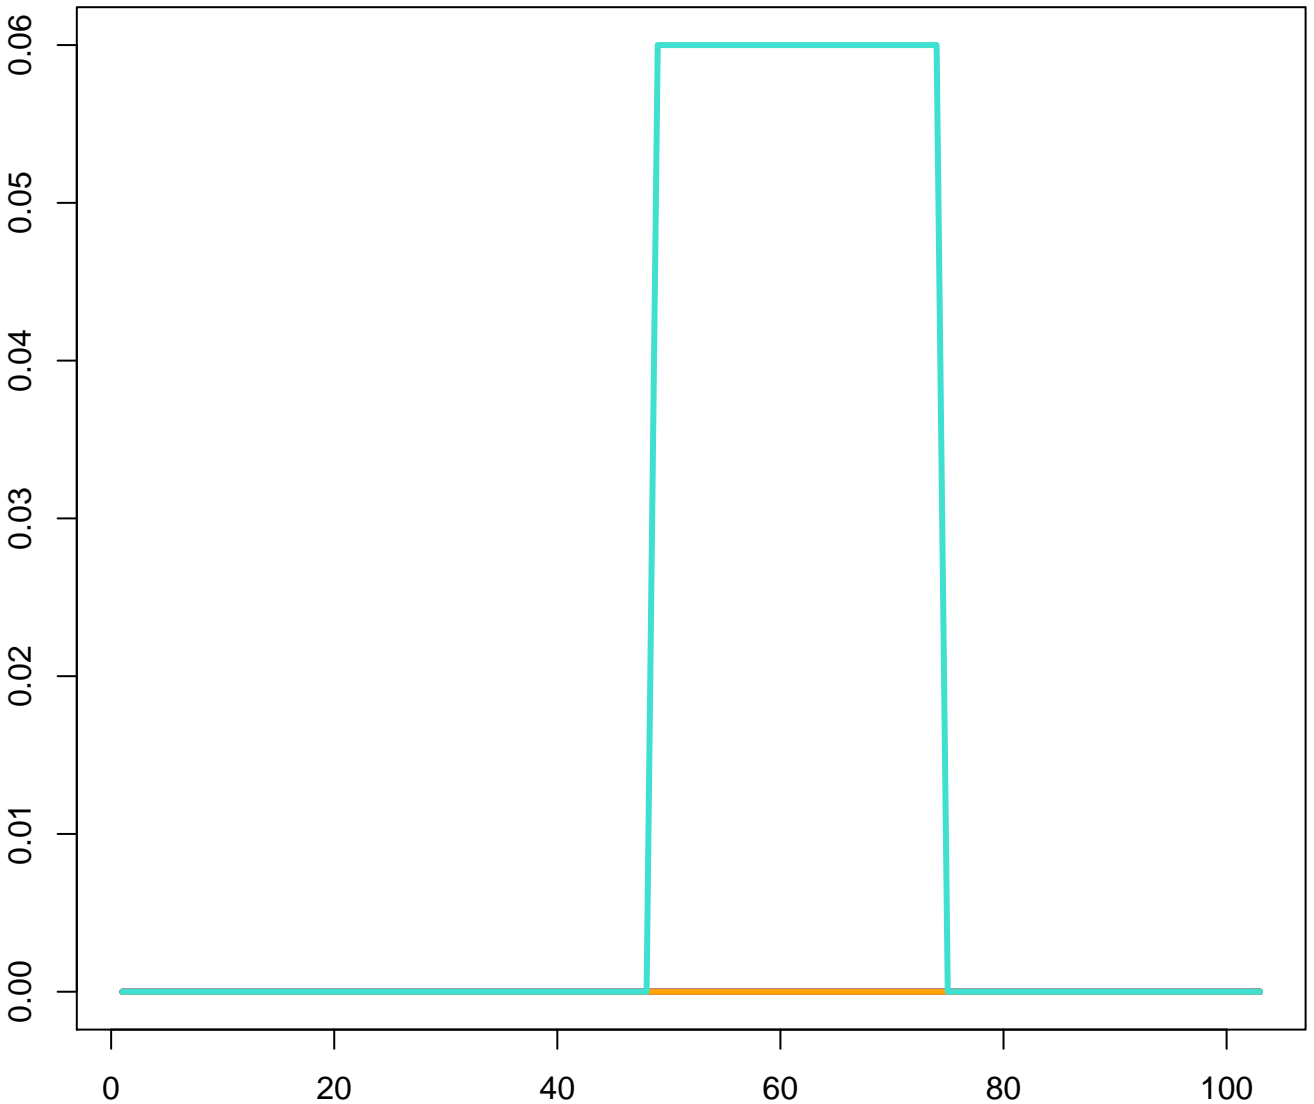

blood brain heart kidney lung ovary skin muscle testis





# 16\_23989851-23989995(-)\_cfa-mir-8854\_low





# 16\_26379772-26379906(-)\_cfa-mir-8799d\_low

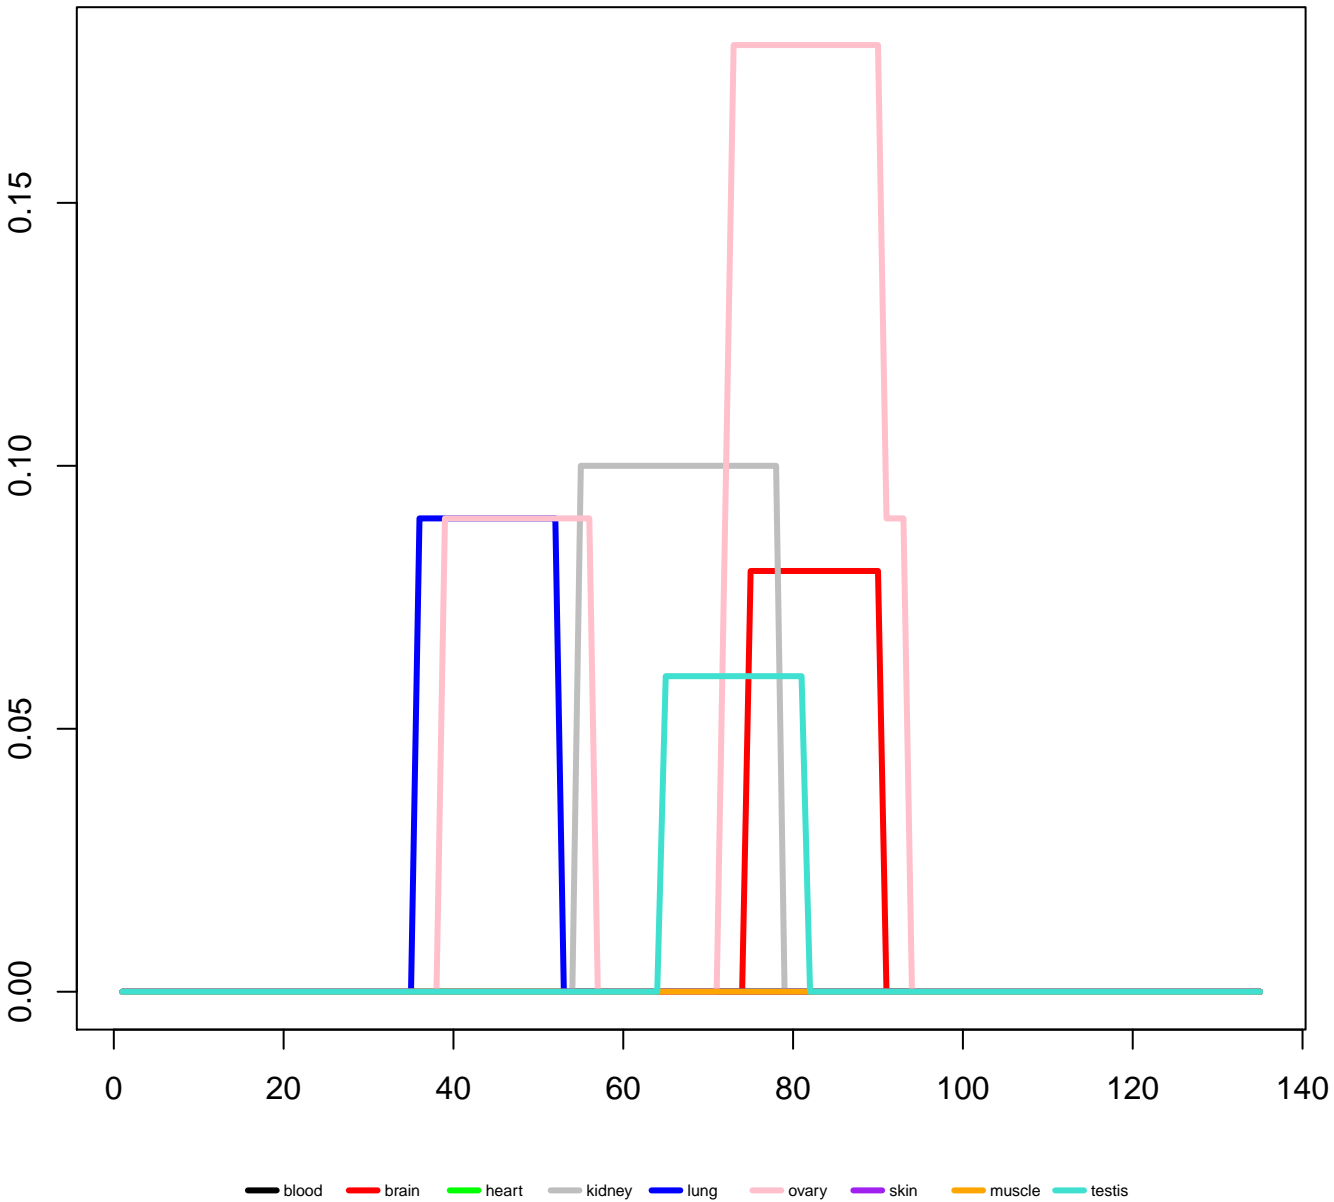

# 16\_34814768-34814900(+)\_cfa-mir-8856\_low

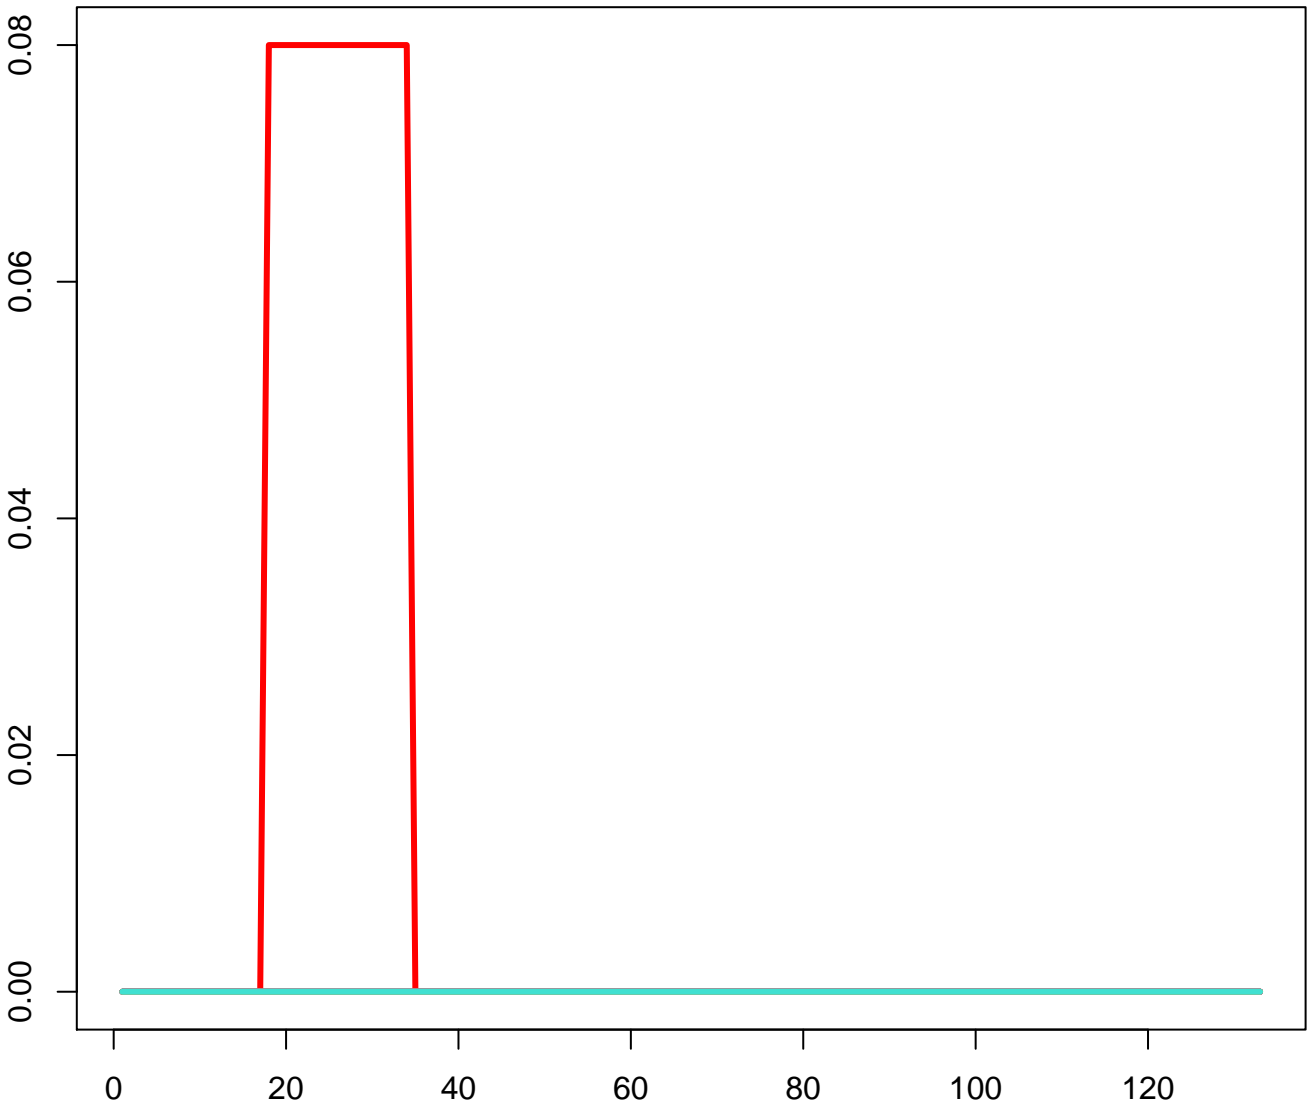

— blood — brain — heart — kidney — lung — ovary — skin — muscle — testis

# 16\_35465007-35465151(-)\_cfa-mir-8848\_low



# 16\_38173722-38173783(-)\_cfa-mir-383\_high

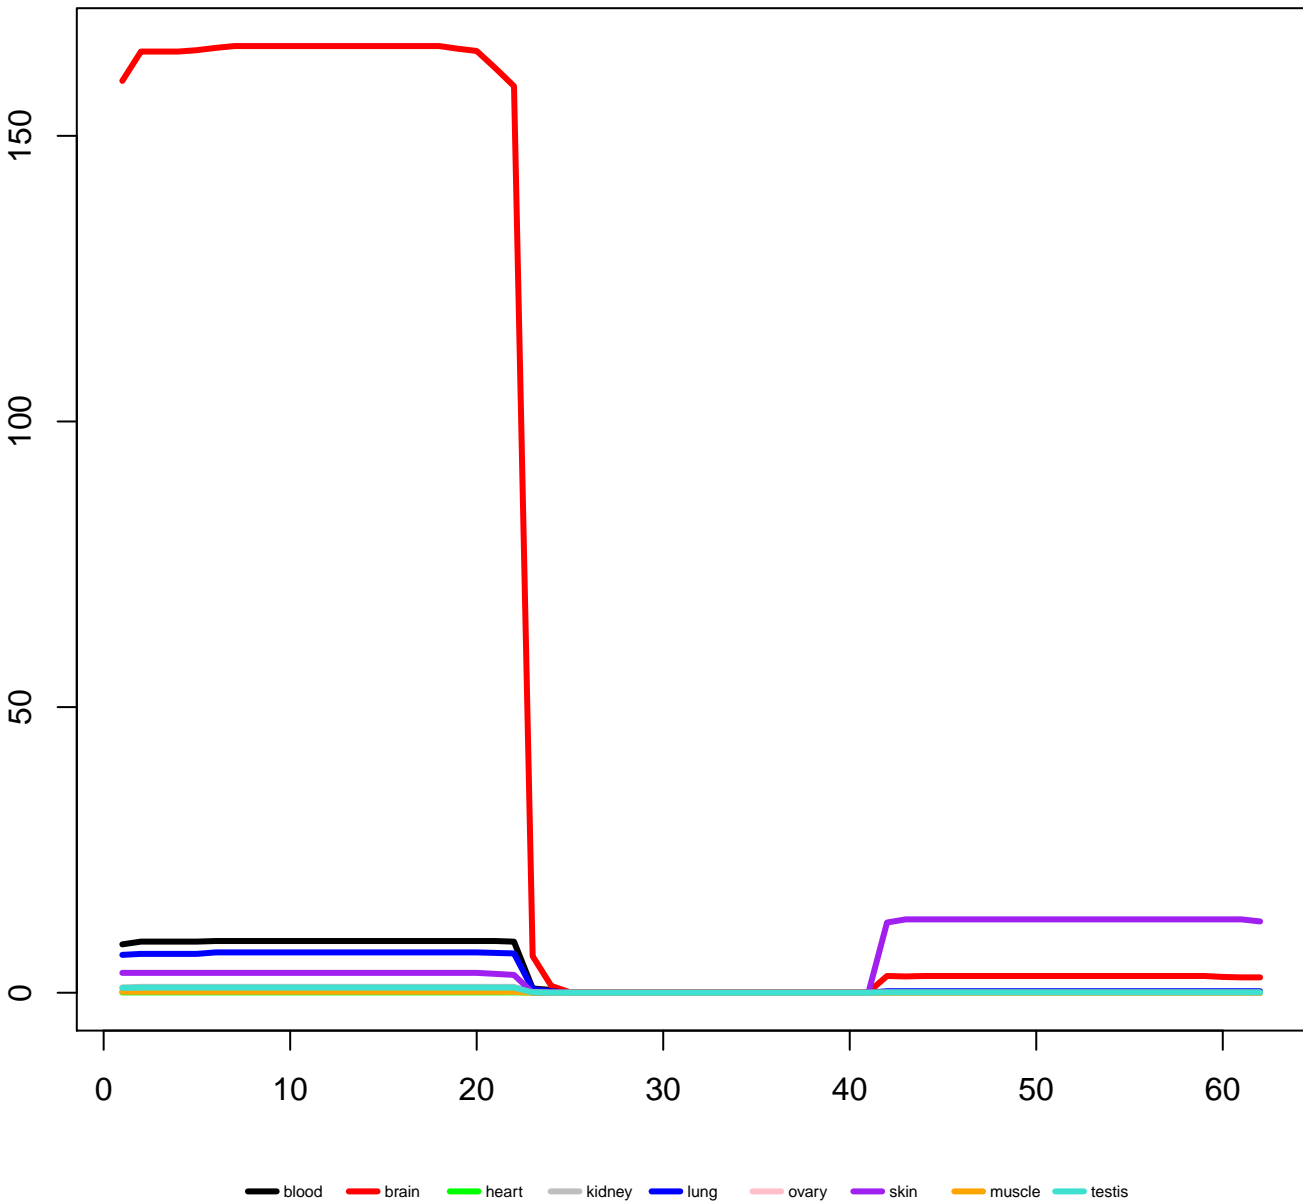

# 17\_7152907-7153051(+)\_cfa-mir-8846\_low



# 17\_13107265-13107389(+)\_cfa-mir-8845\_low

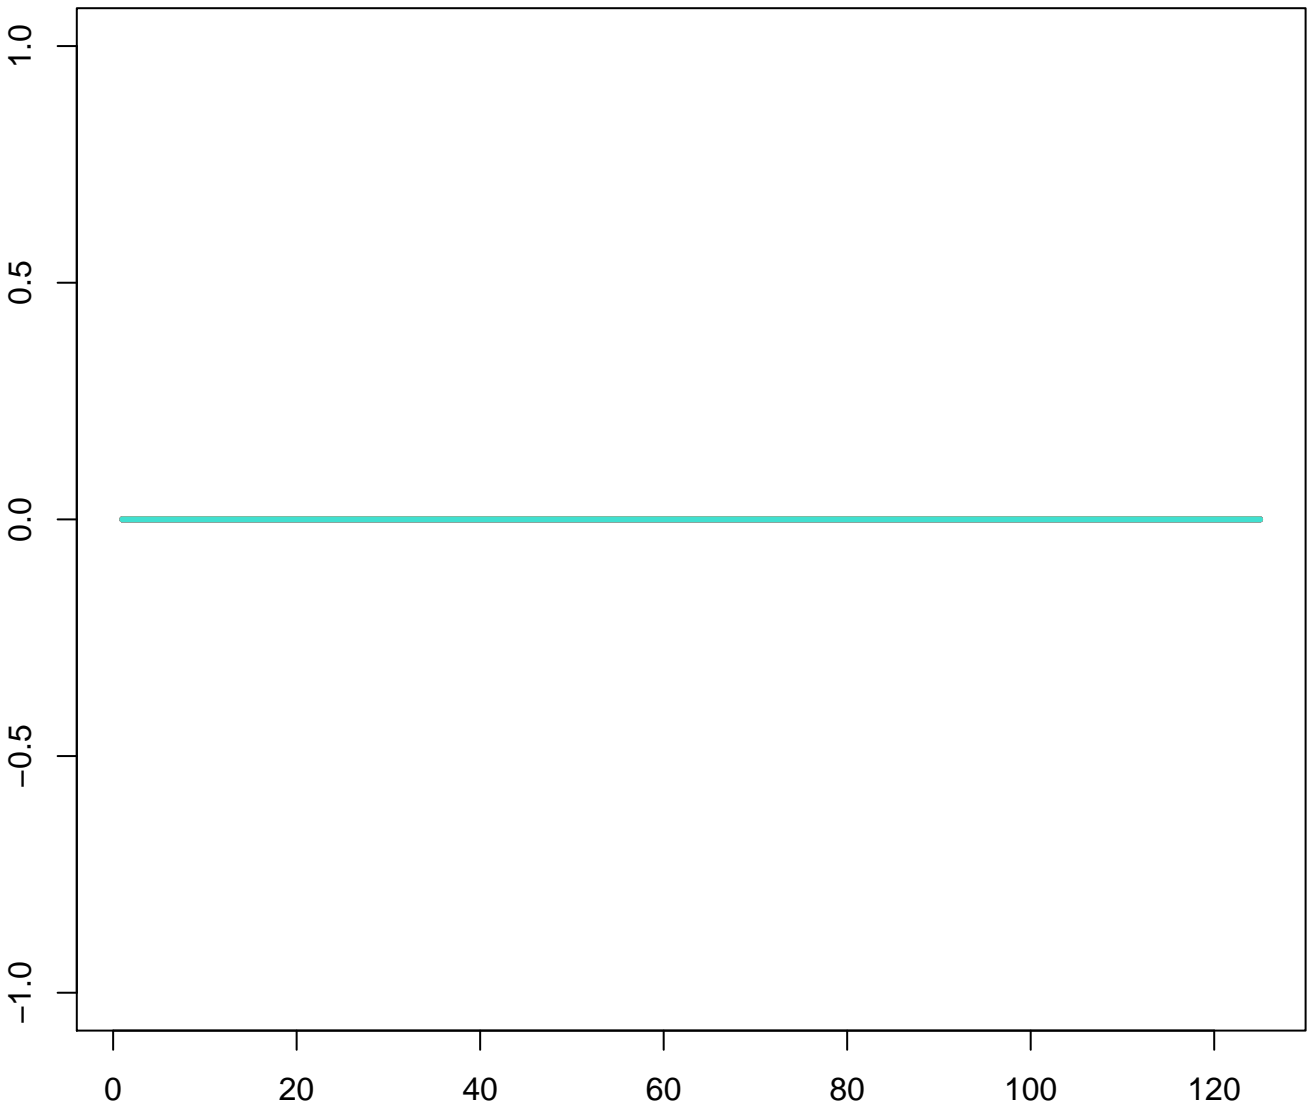

blood brain heart kidney lung ovary skin muscle testis

# 17\_19575798-19575932(-)\_cfa-mir-1301\_high

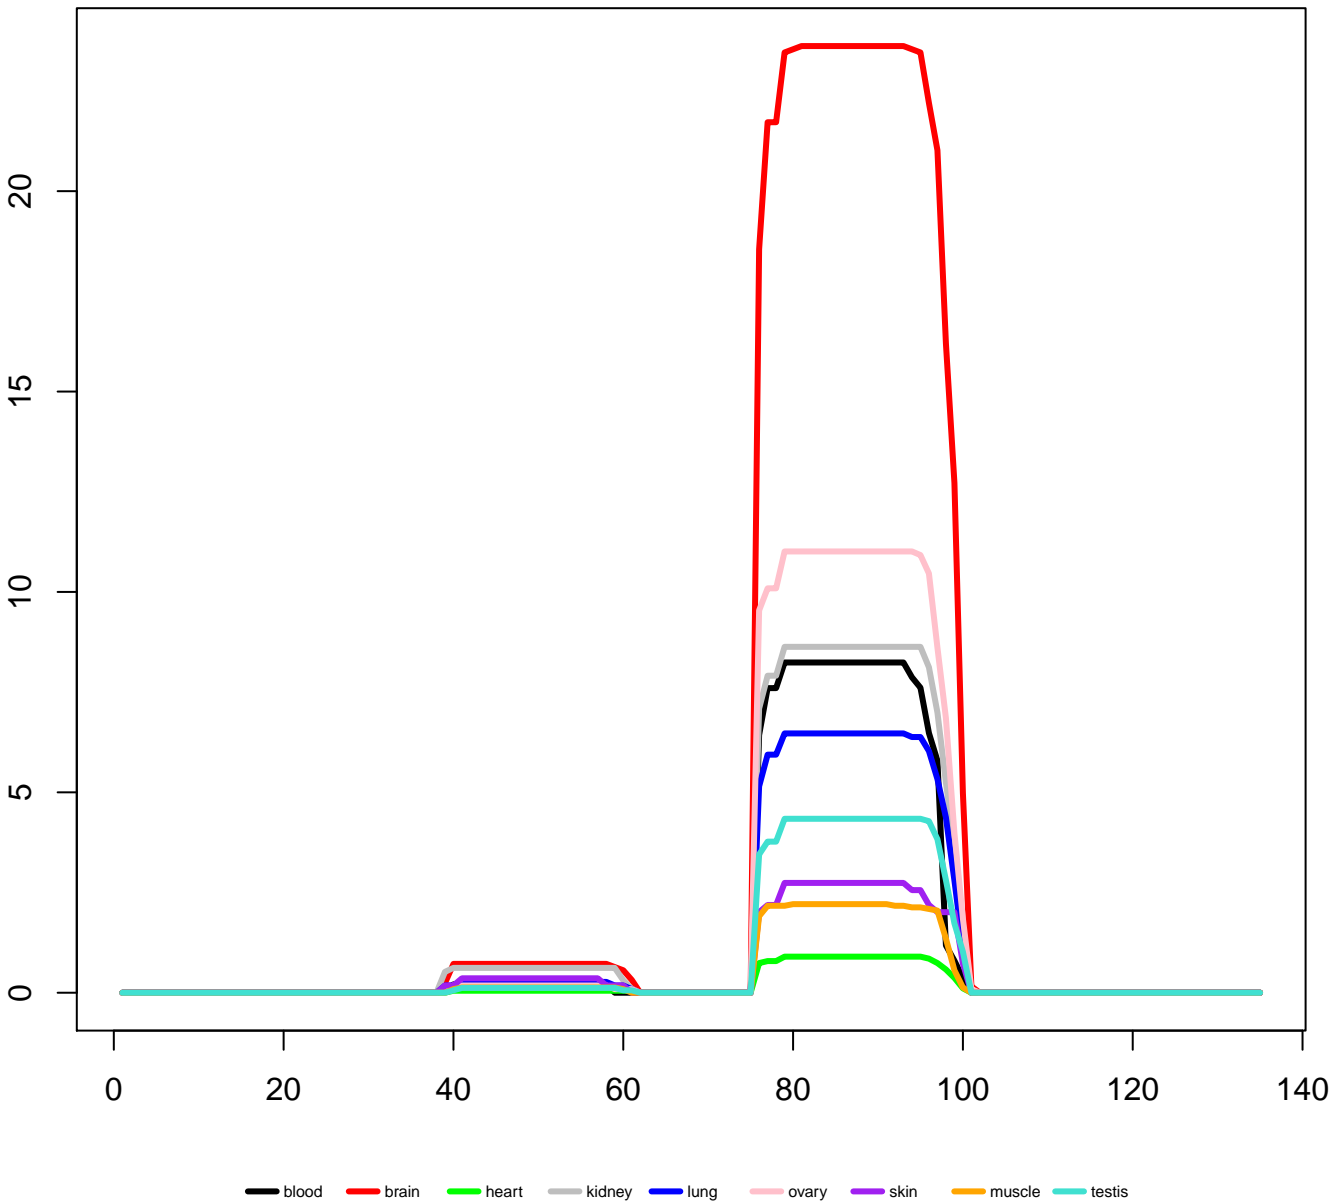

# 17\_21491603-21491661(-)\_cfa-mir-1837-1\_high

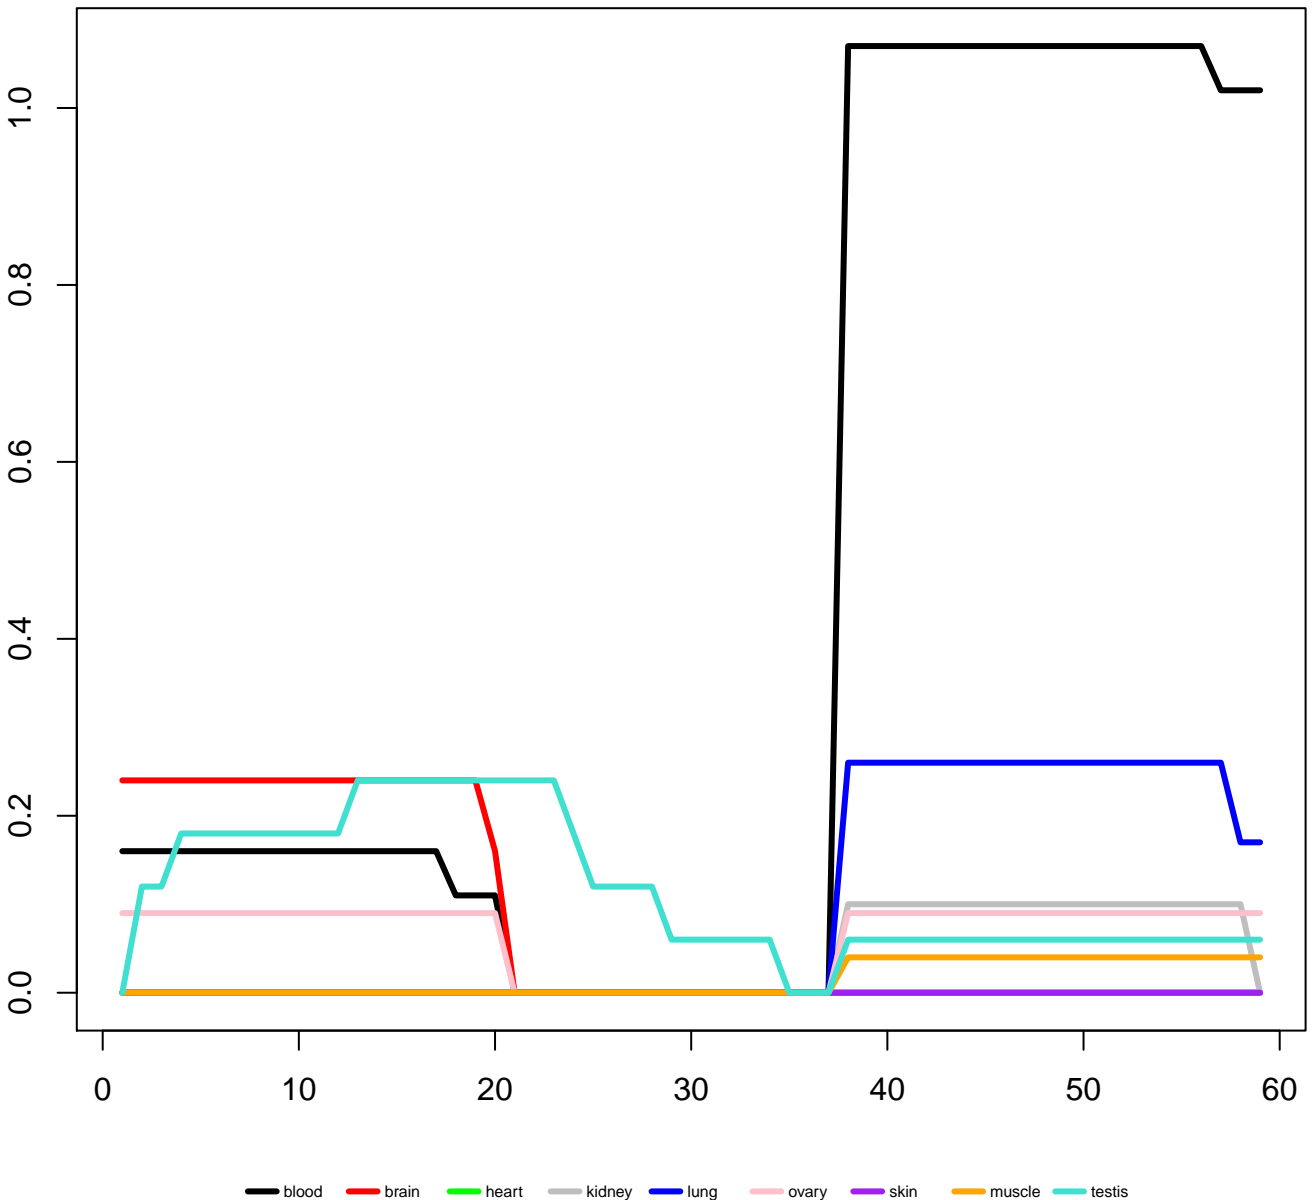



# 17\_21620453-21620511(-)\_cfa-mir-1837-2\_high



# 17\_38744548-38744692(-)\_cfa-mir-8843\_low



blood brain heart kidney lung ovary skin muscle testis

# 17\_51412614-51412714(-)\_cfa-mir-8842\_low

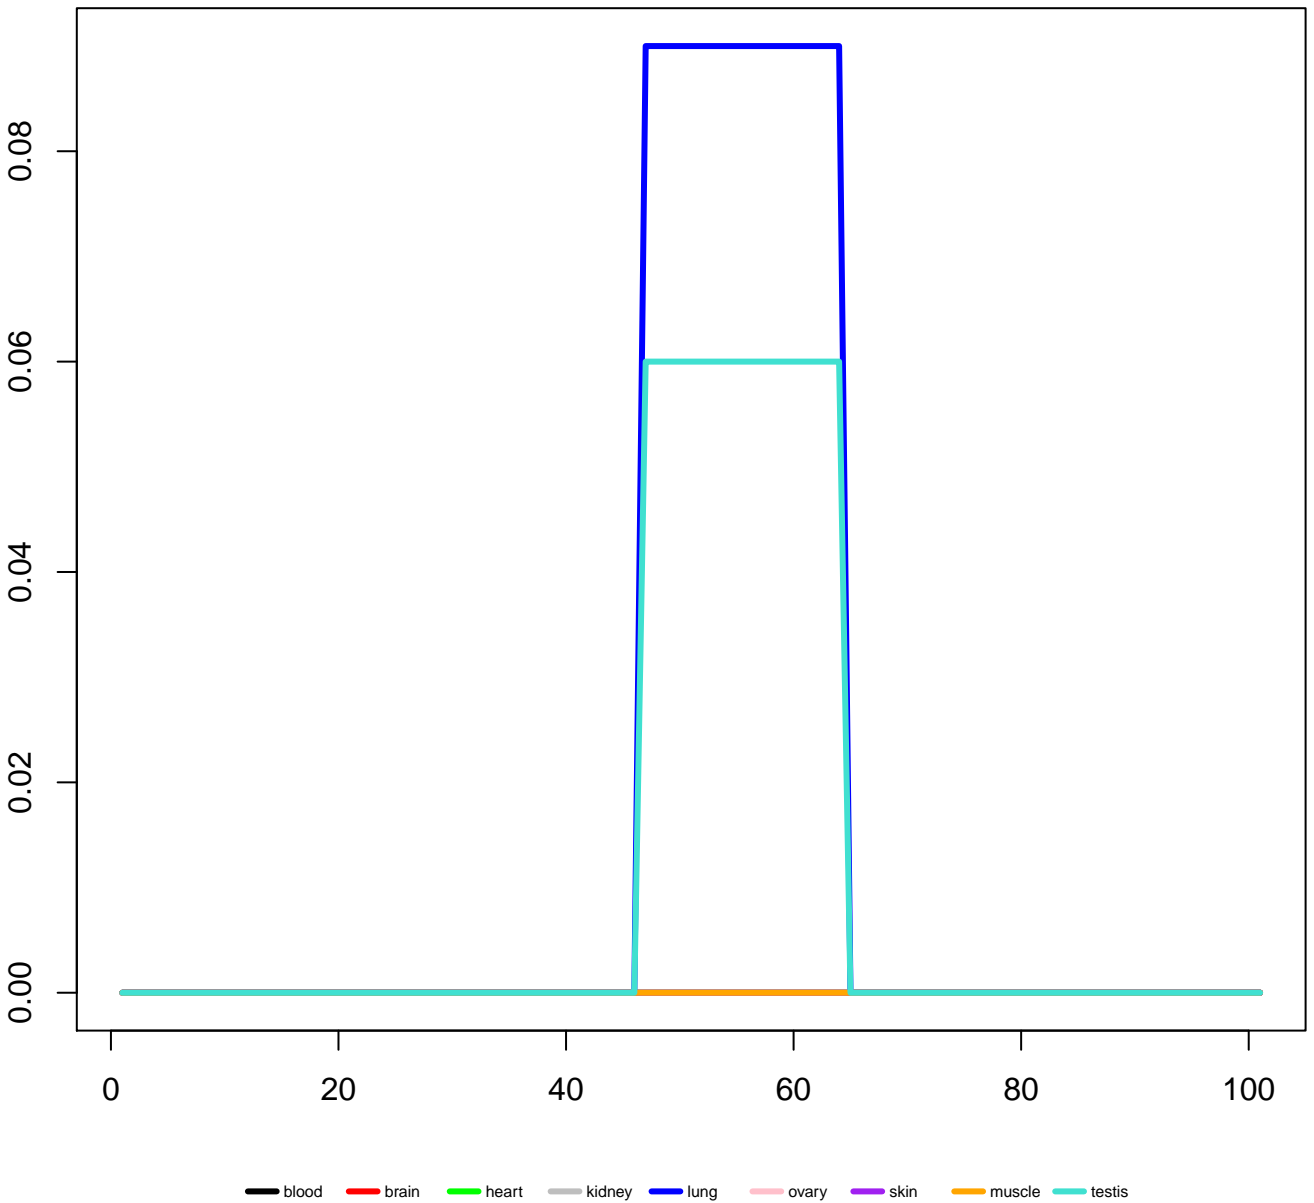

# 17\_61805689-61805825(-)\_cfa-mir-8844\_low

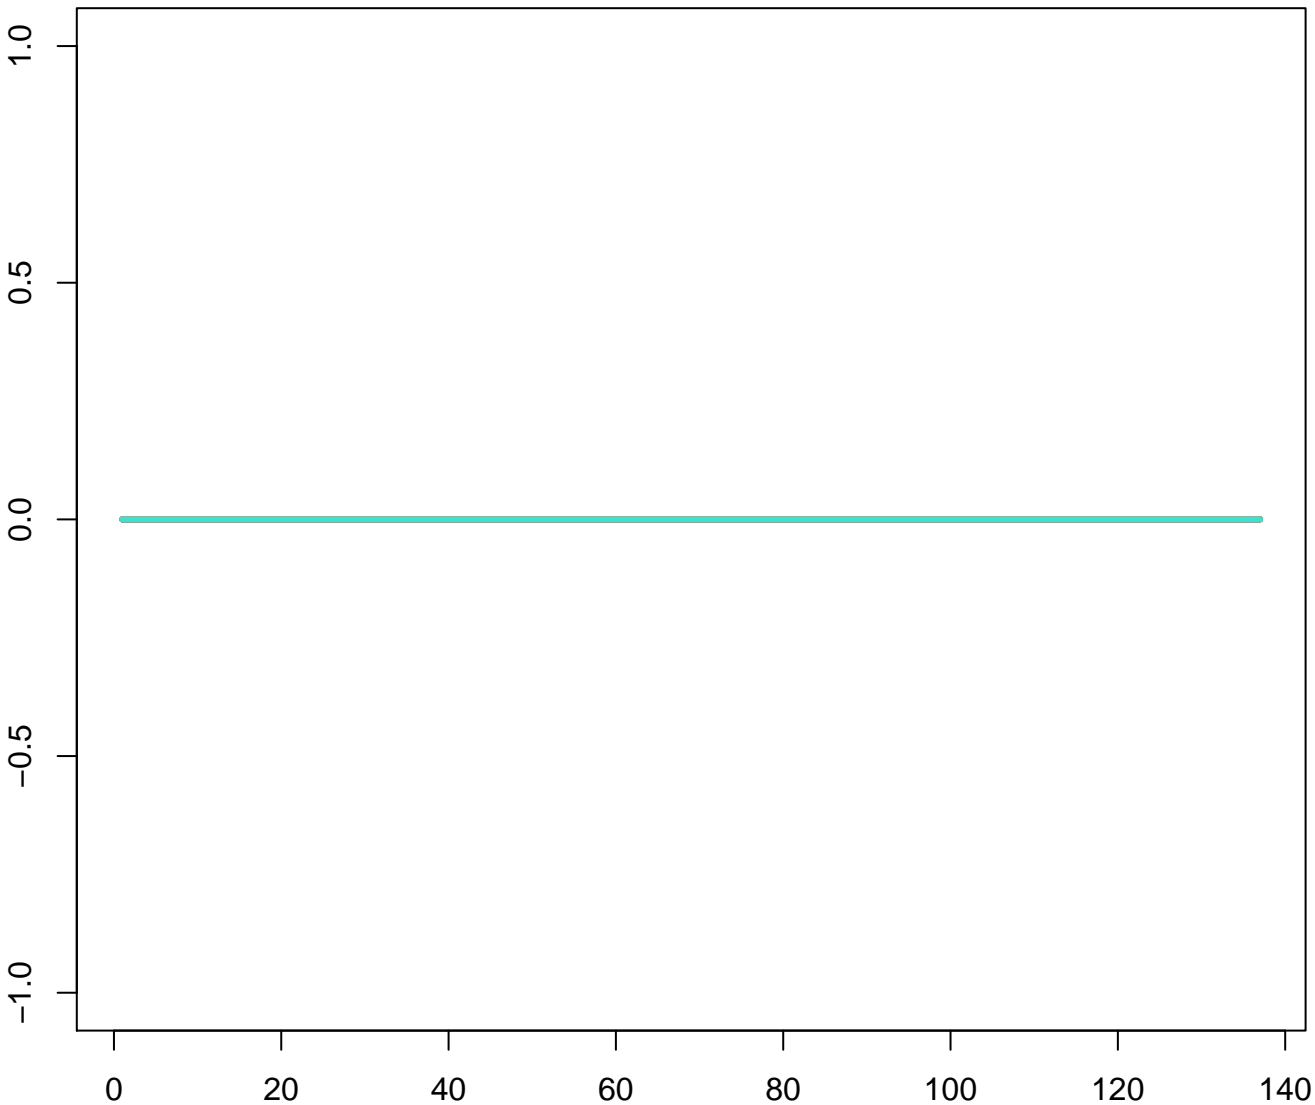

blood brain heart kidney lung ovary skin muscle testis

# 18\_25675449-25675546(-)\_cfa-mir-210\_high

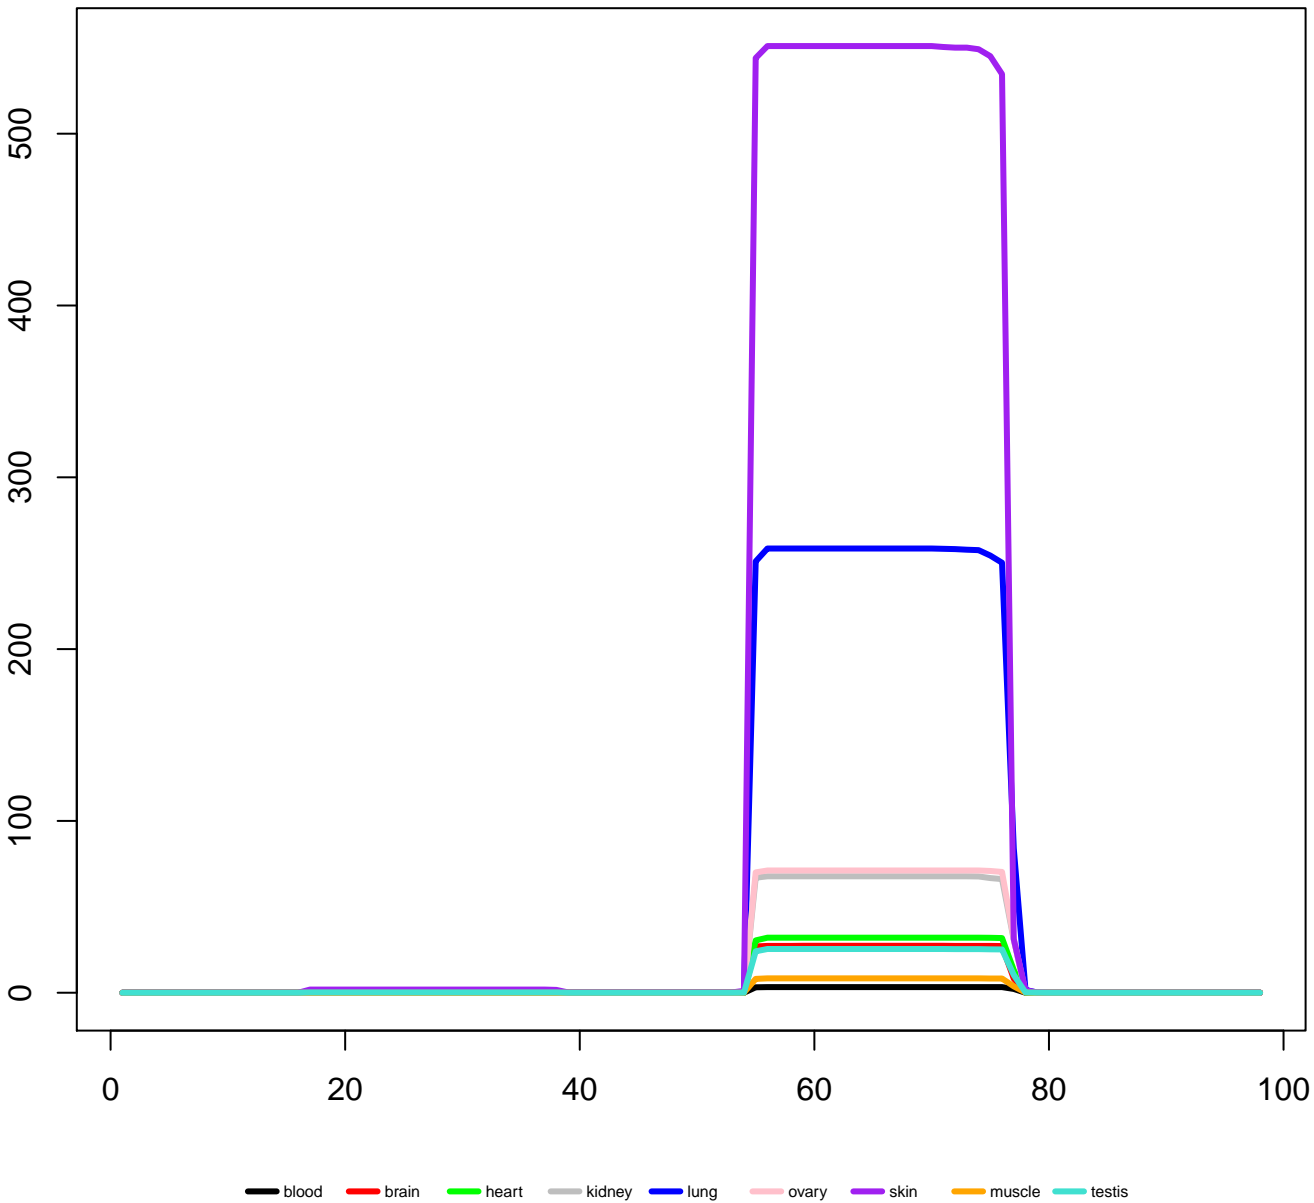









# 18\_38543618-38543679(-)\_cfa-mir-130a\_high

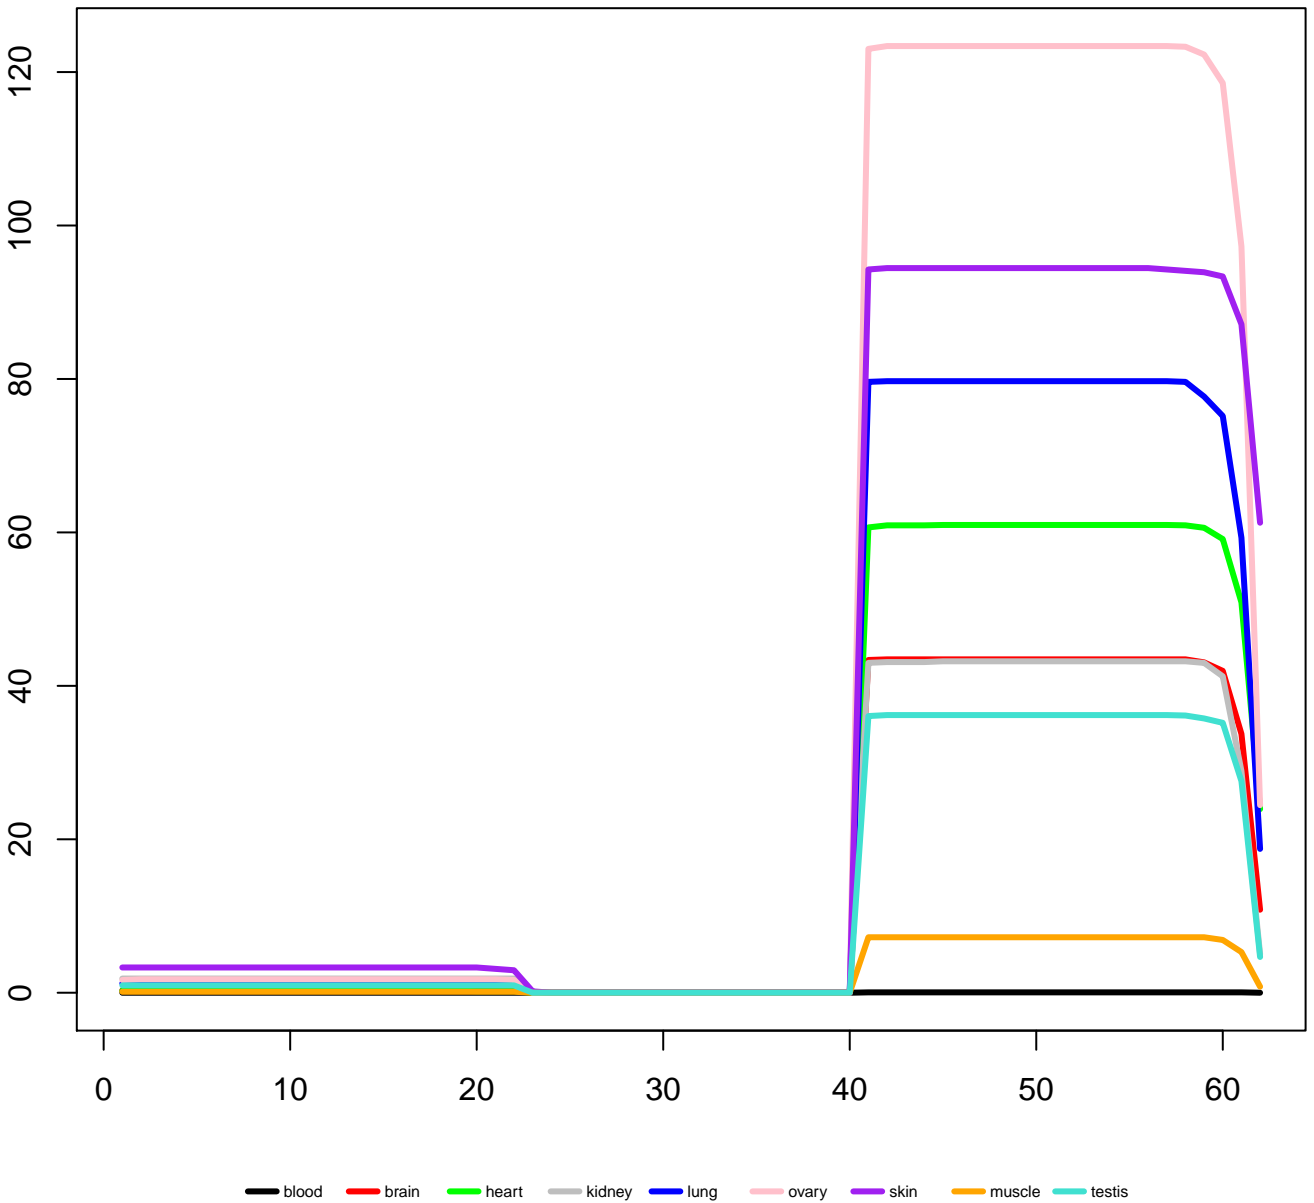

# 18\_43307787-43307884(+)\_mir-1955\_low

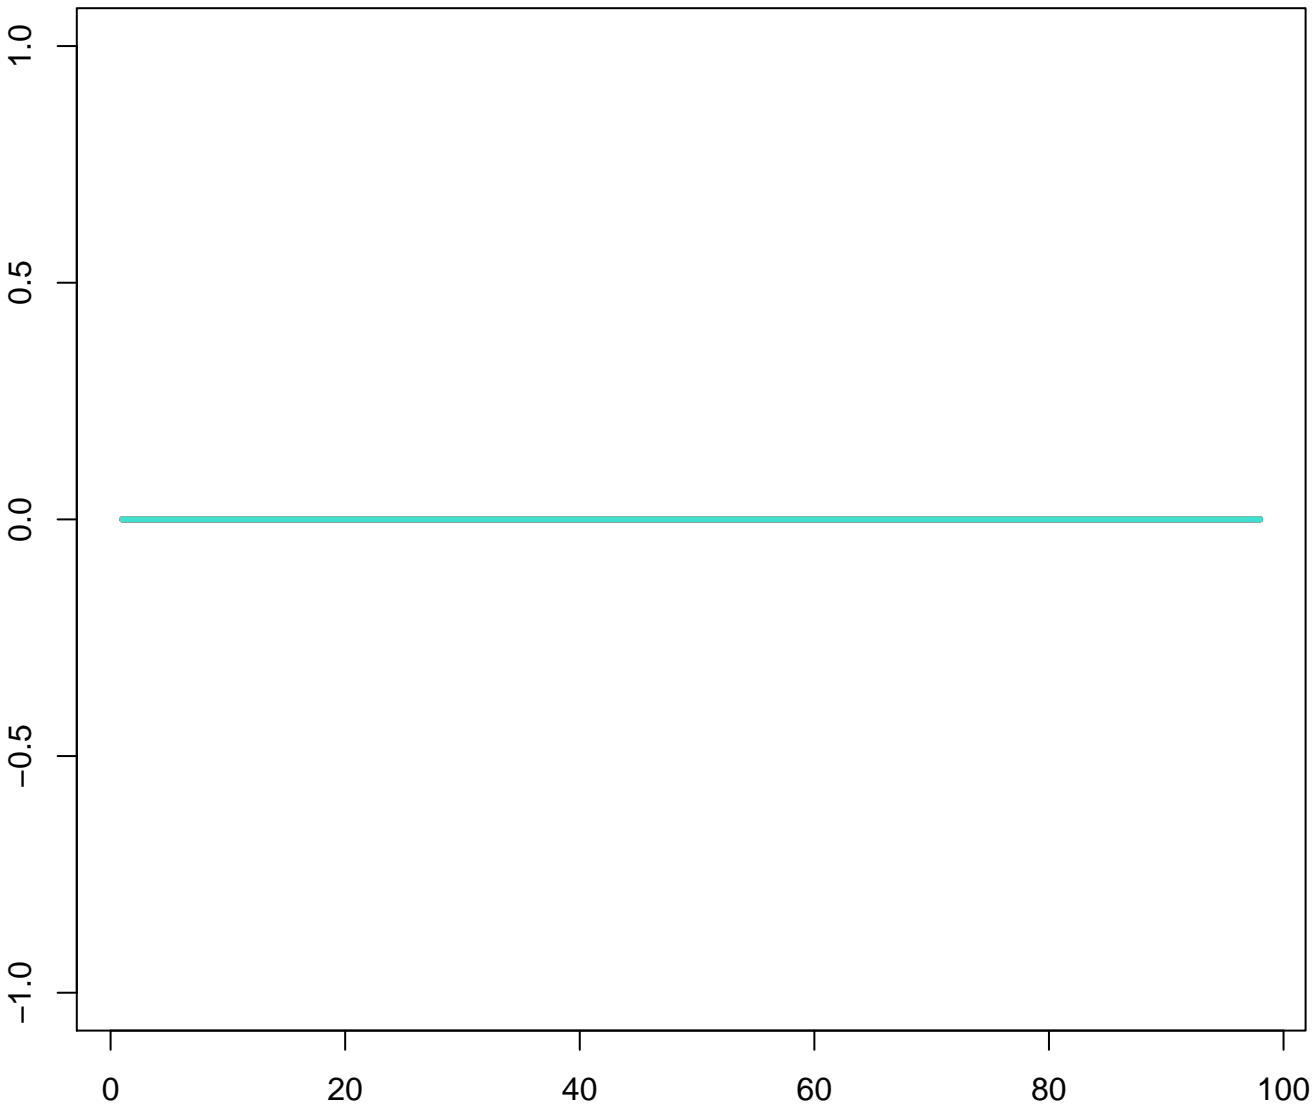

— blood — brain — heart — kidney — lung — ovary — skin — muscle — testis

# 18\_43668954-43669062(-)\_cfa-mir-8861\_low

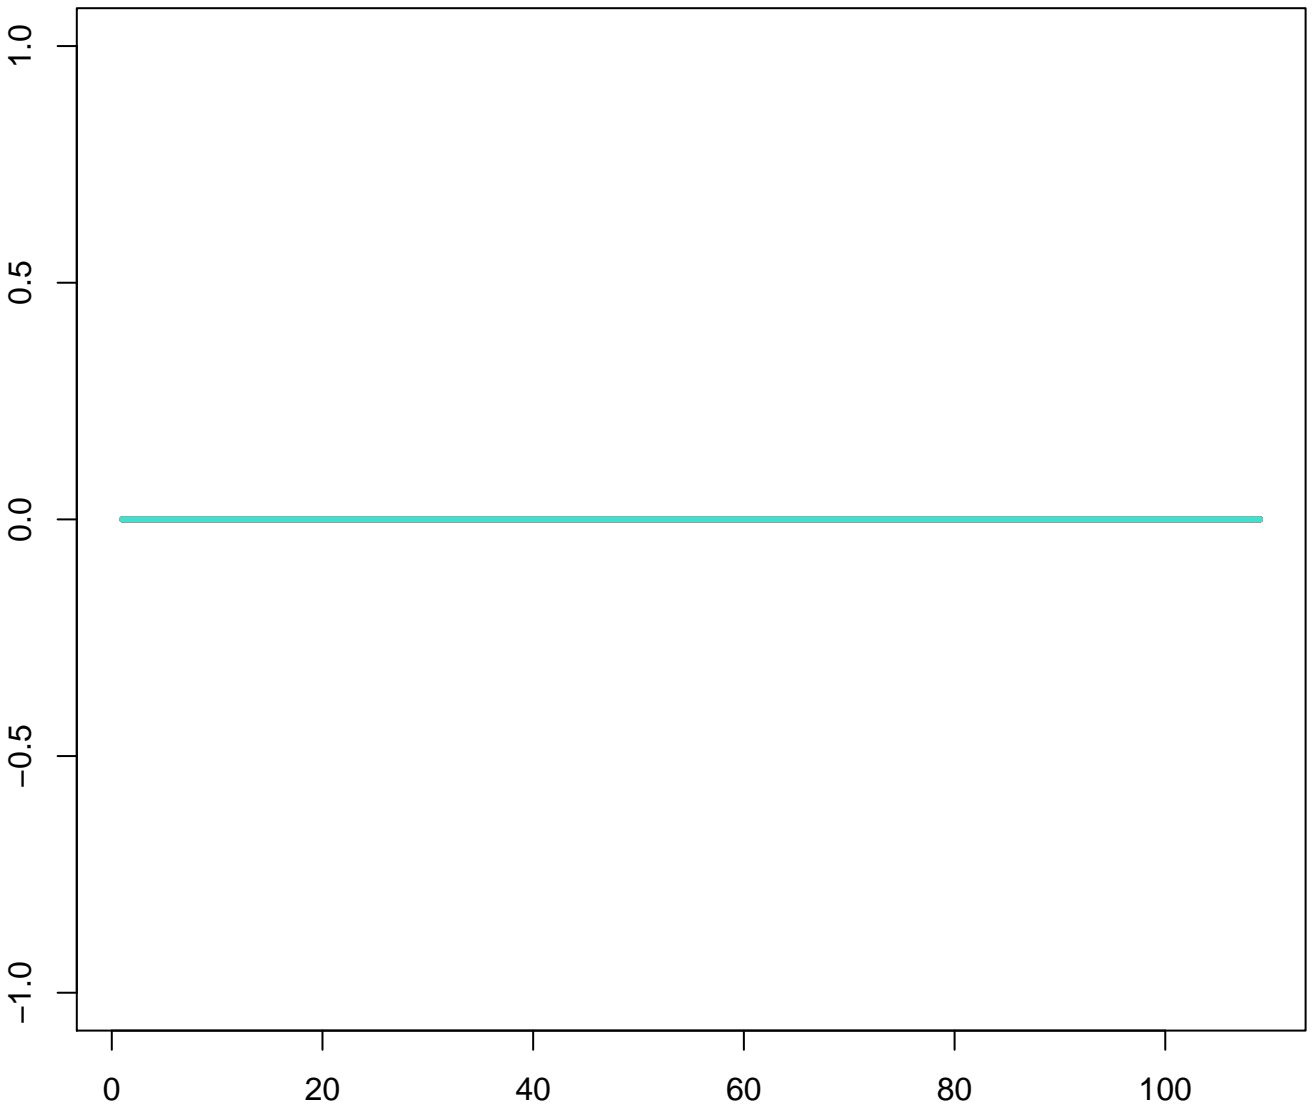

blood brain heart kidney lung ovary skin muscle testis

# 18\_46206396-46206474(-)\_mir-675\_high

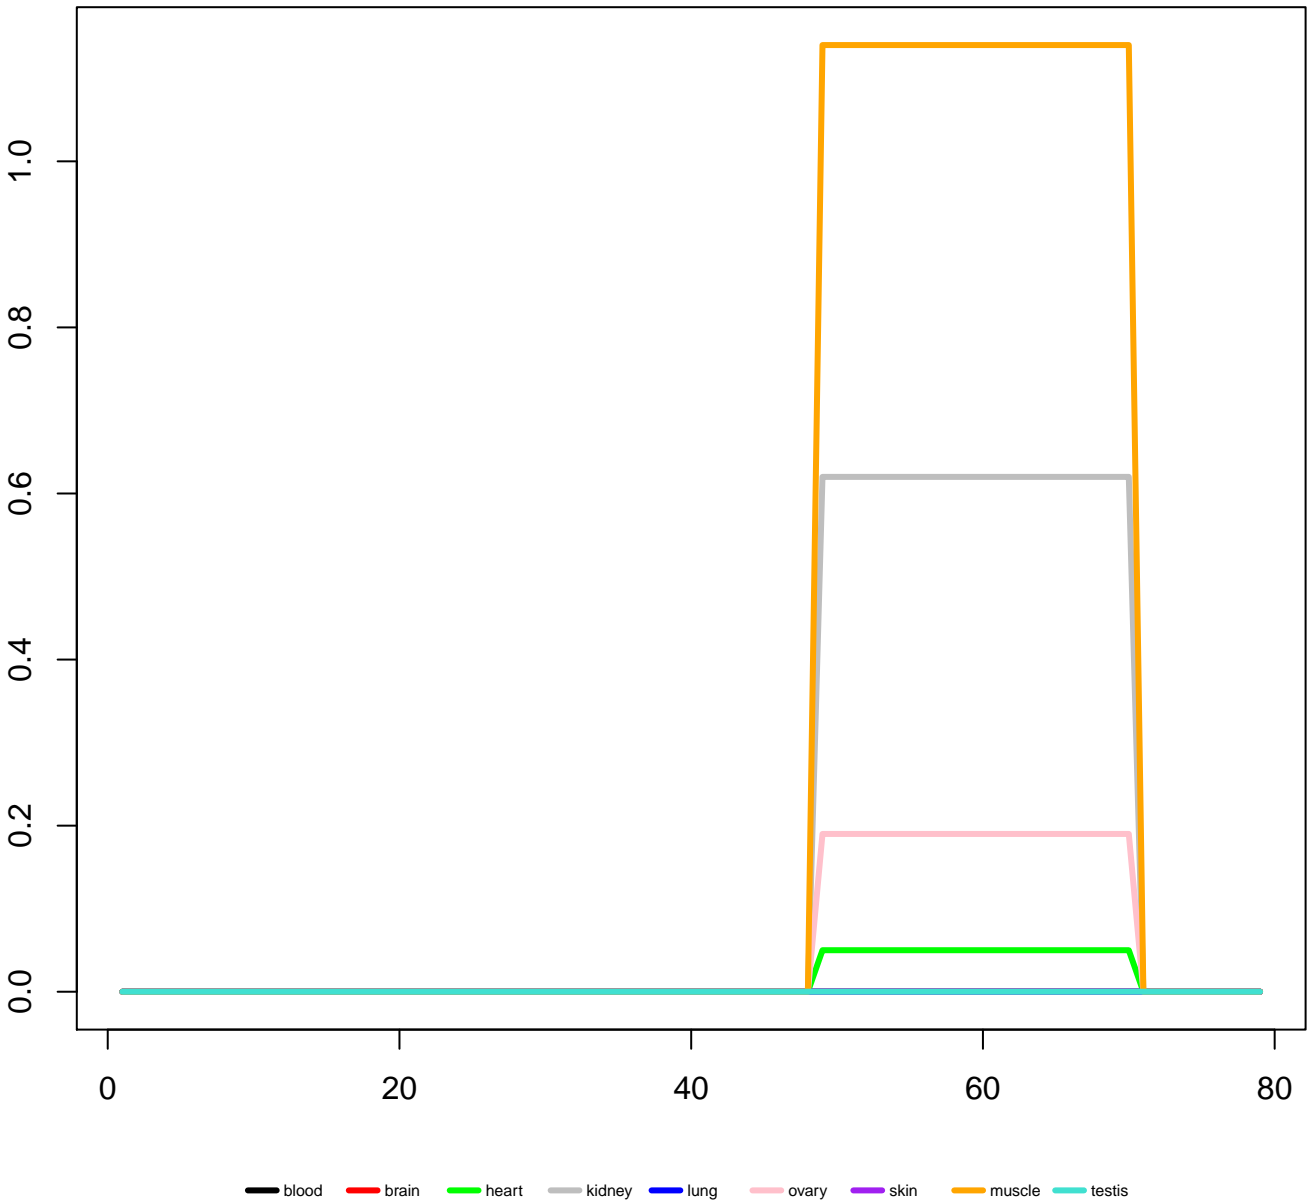





# 18\_46690541-46690679(-)\_cfa-mir-8859b\_high

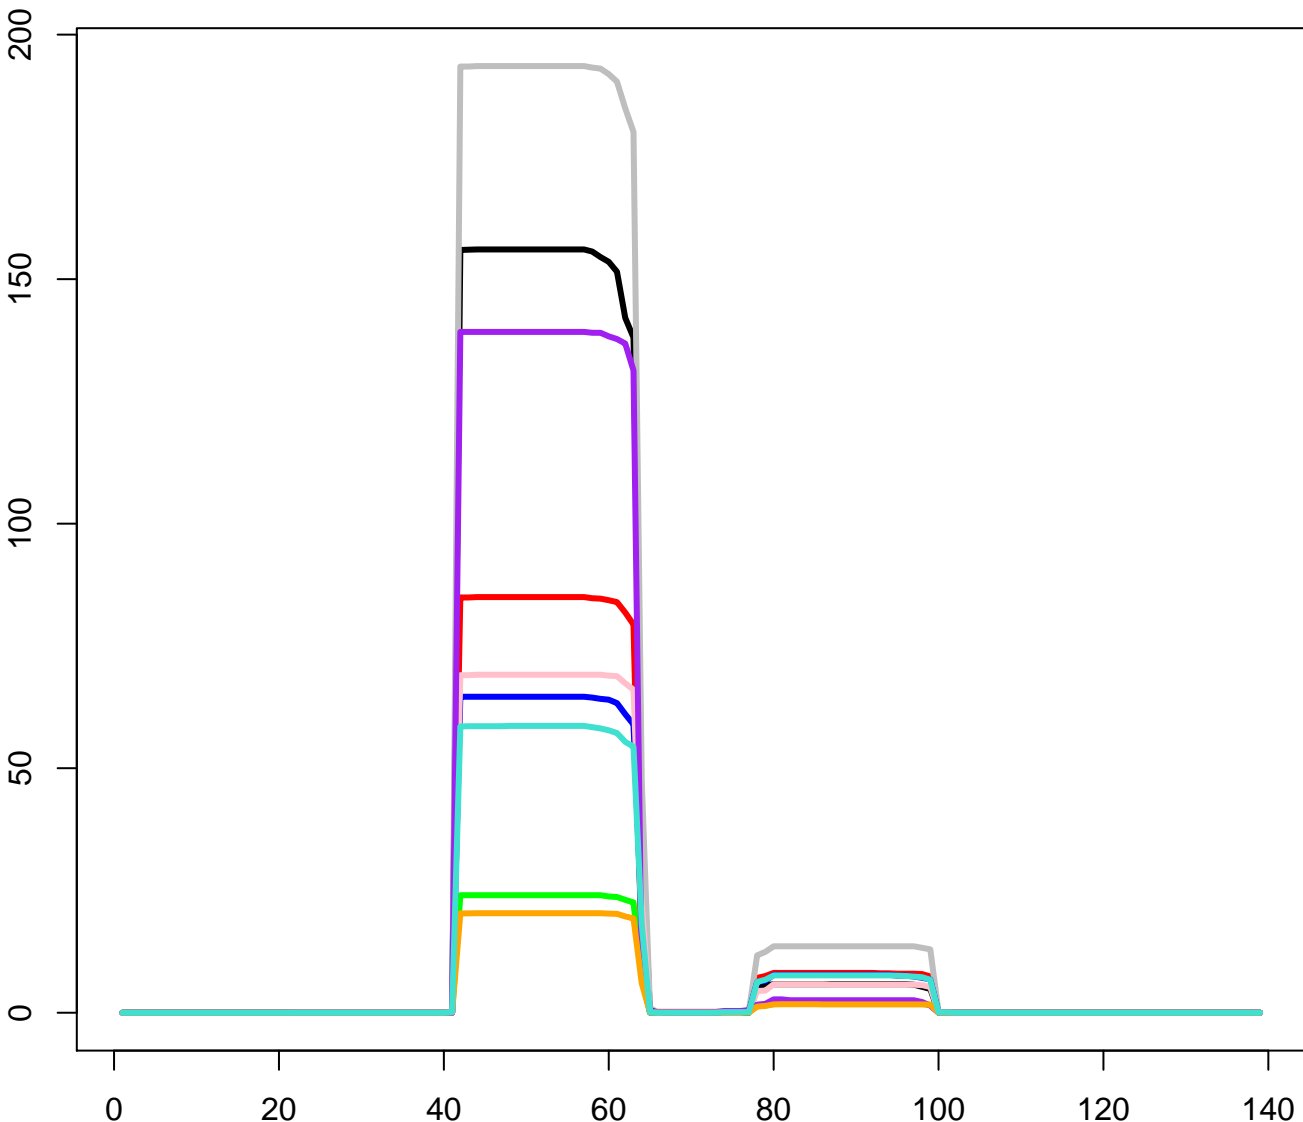

— blood — brain — heart — kidney — lung — ovary — skin — muscle — testis

# 18\_47168318-47168452(-)\_cfa-mir-8860\_low

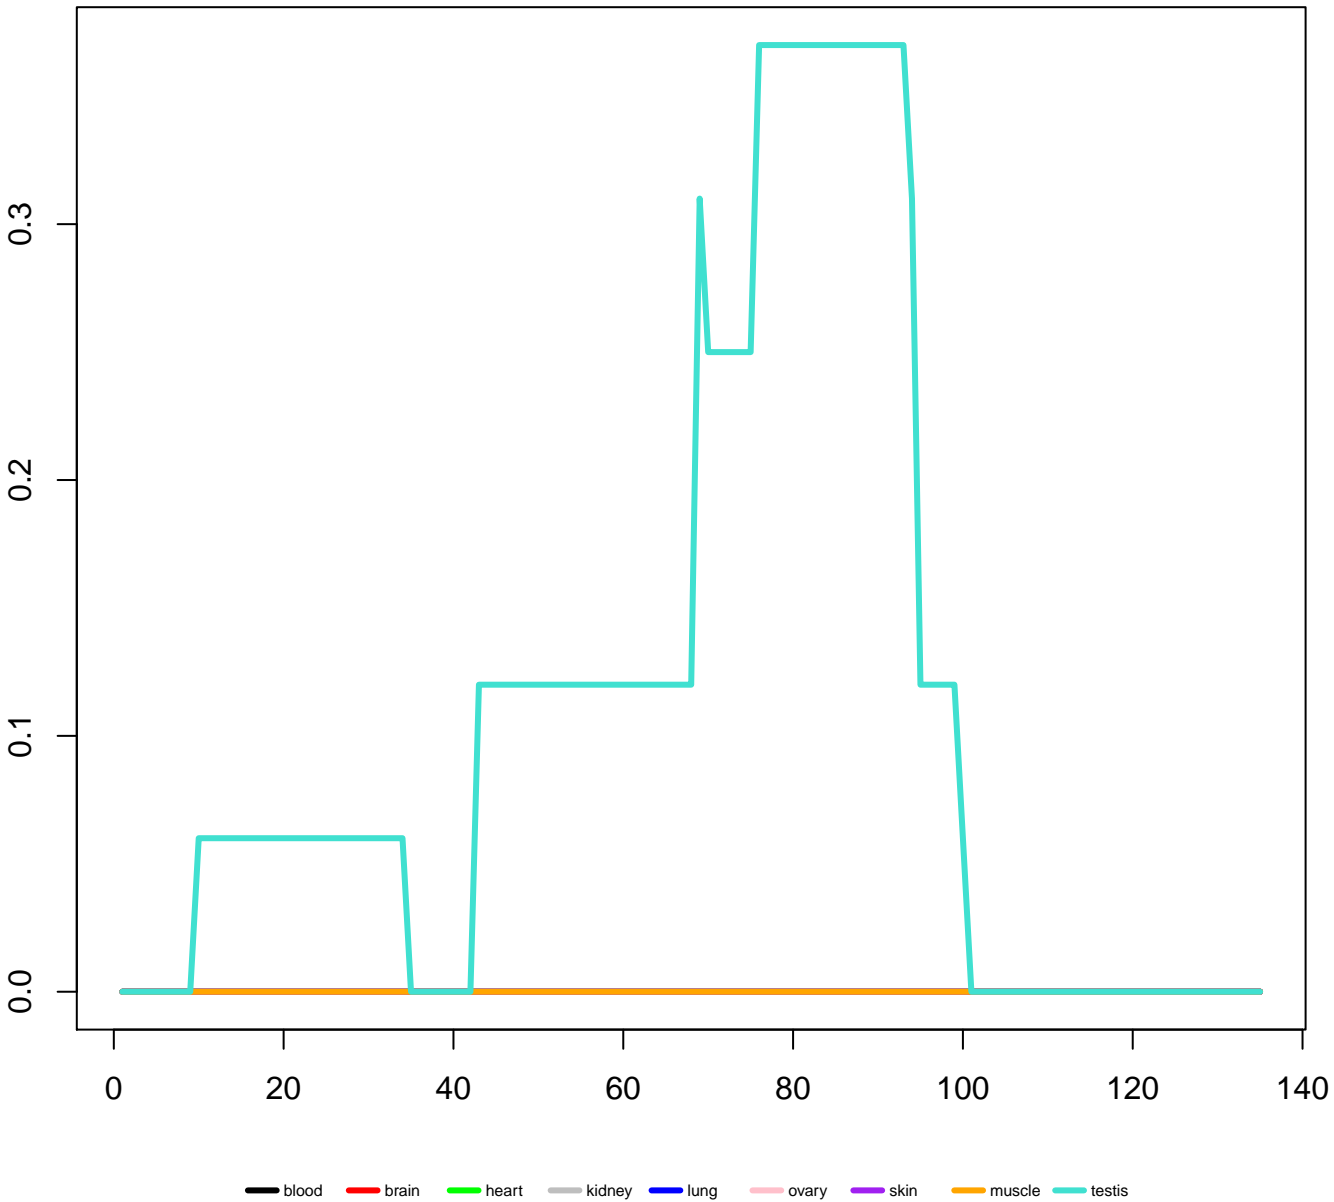



# 18\_51707336-51707474(-)\_cfa-mir-8858\_low

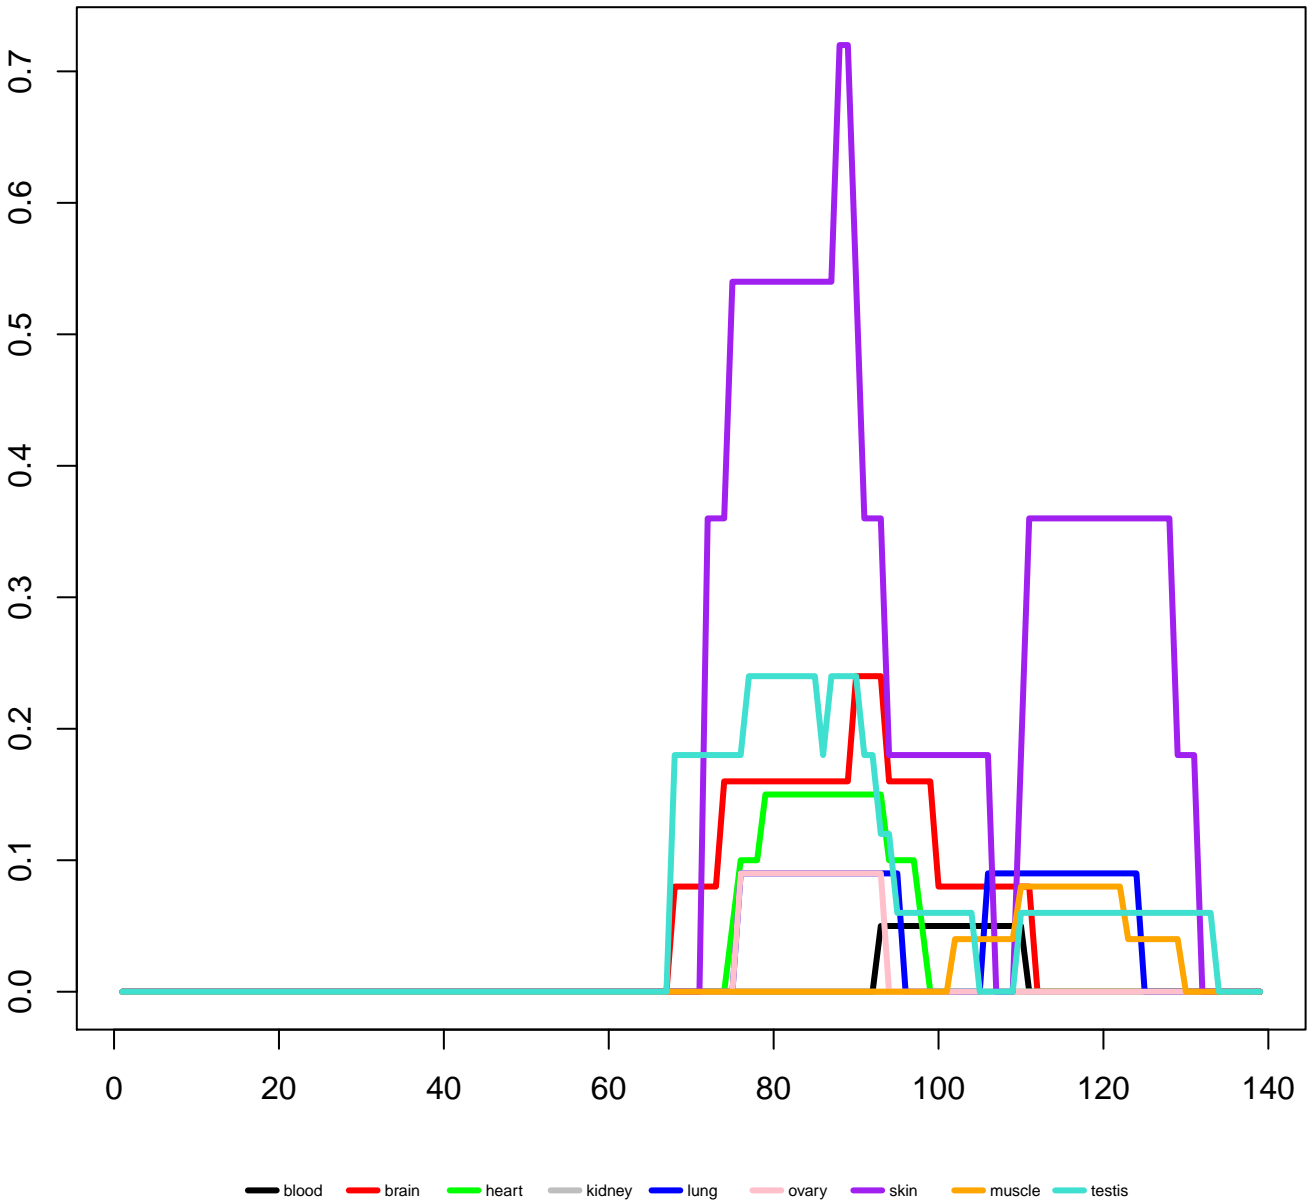

# 18\_52251213-52251295(-)\_mir-9112\_low

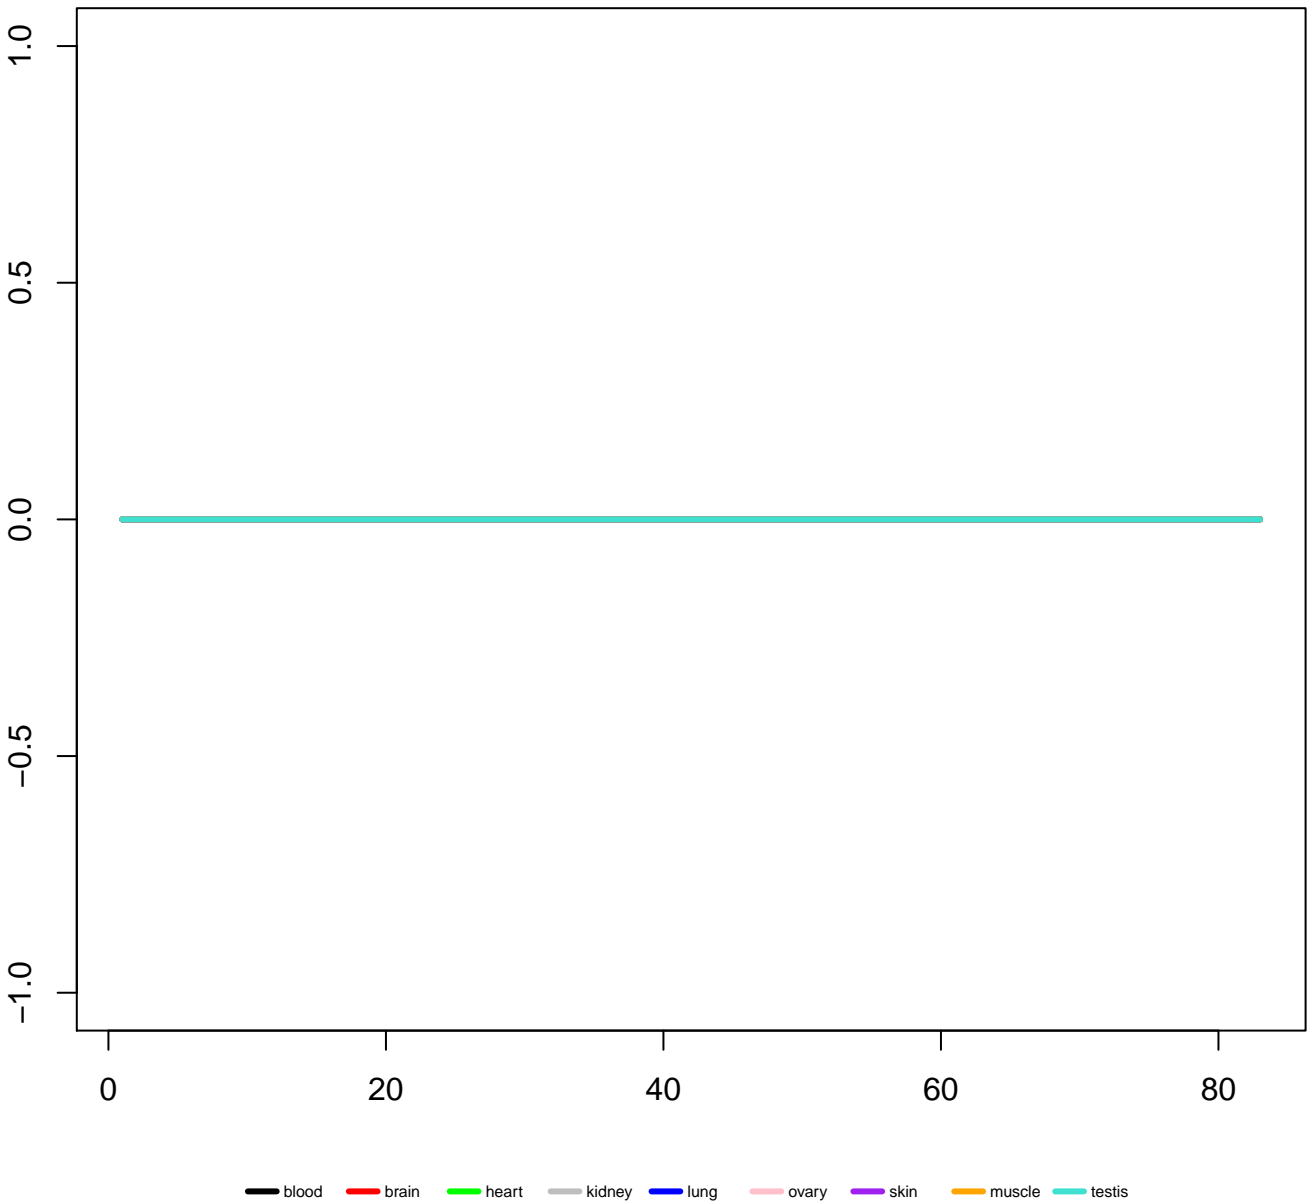



# 18\_52281129-52281193(+)\_cfa-mir-192\_high

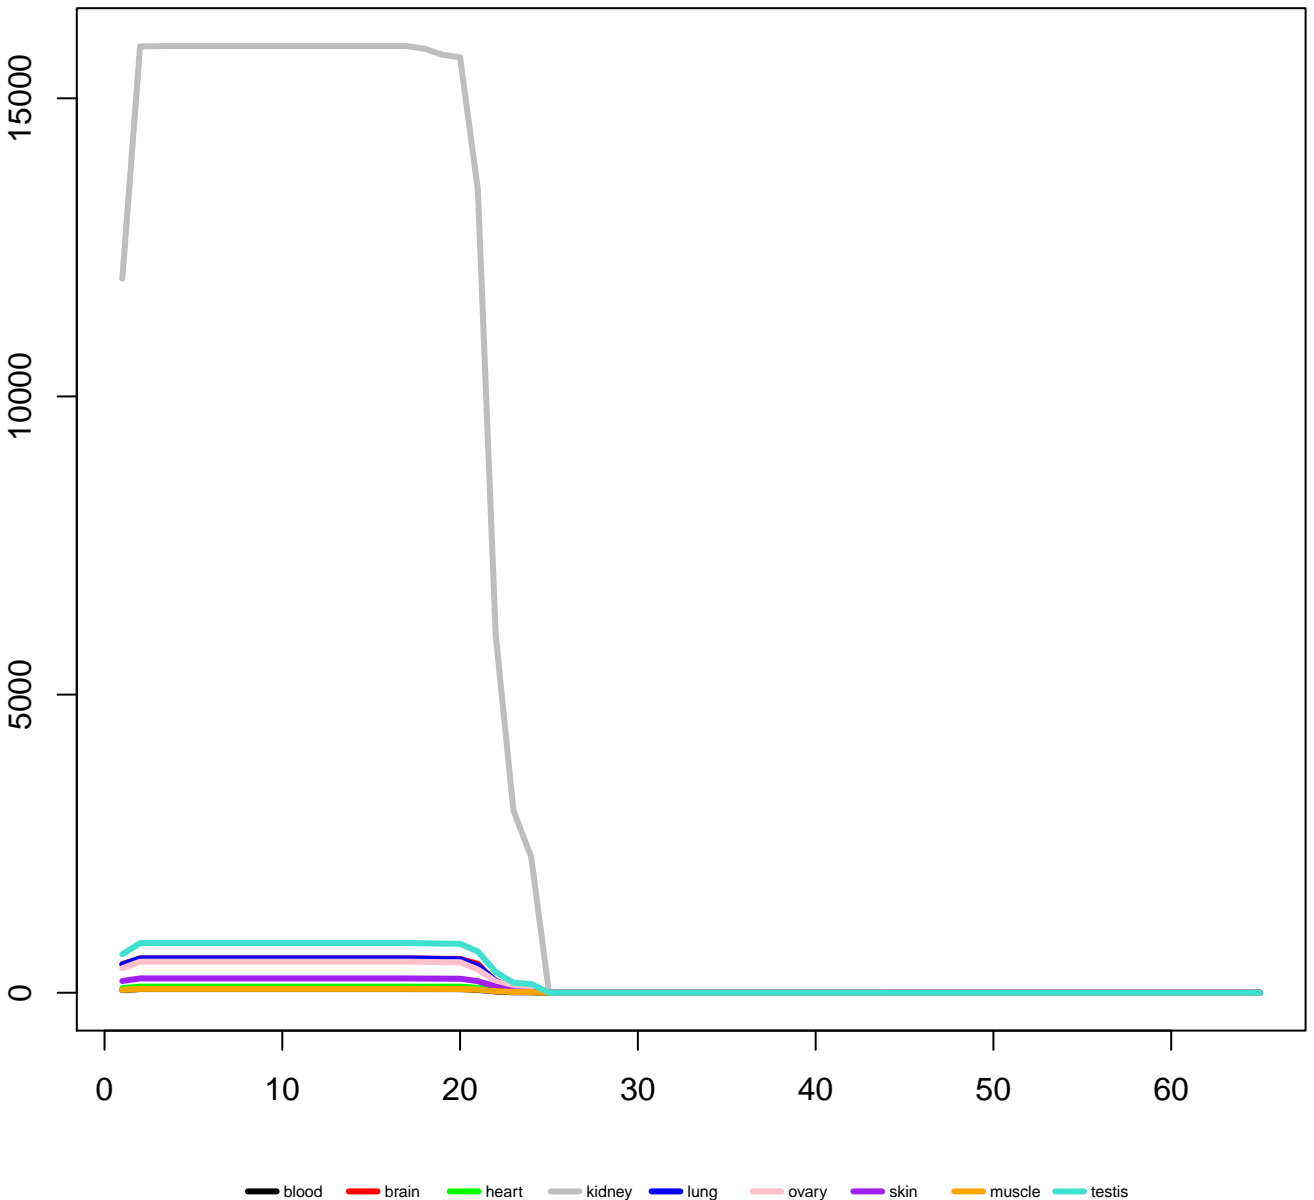

# 19\_13642448-13642578(+)\_cfa-mir-8857\_low

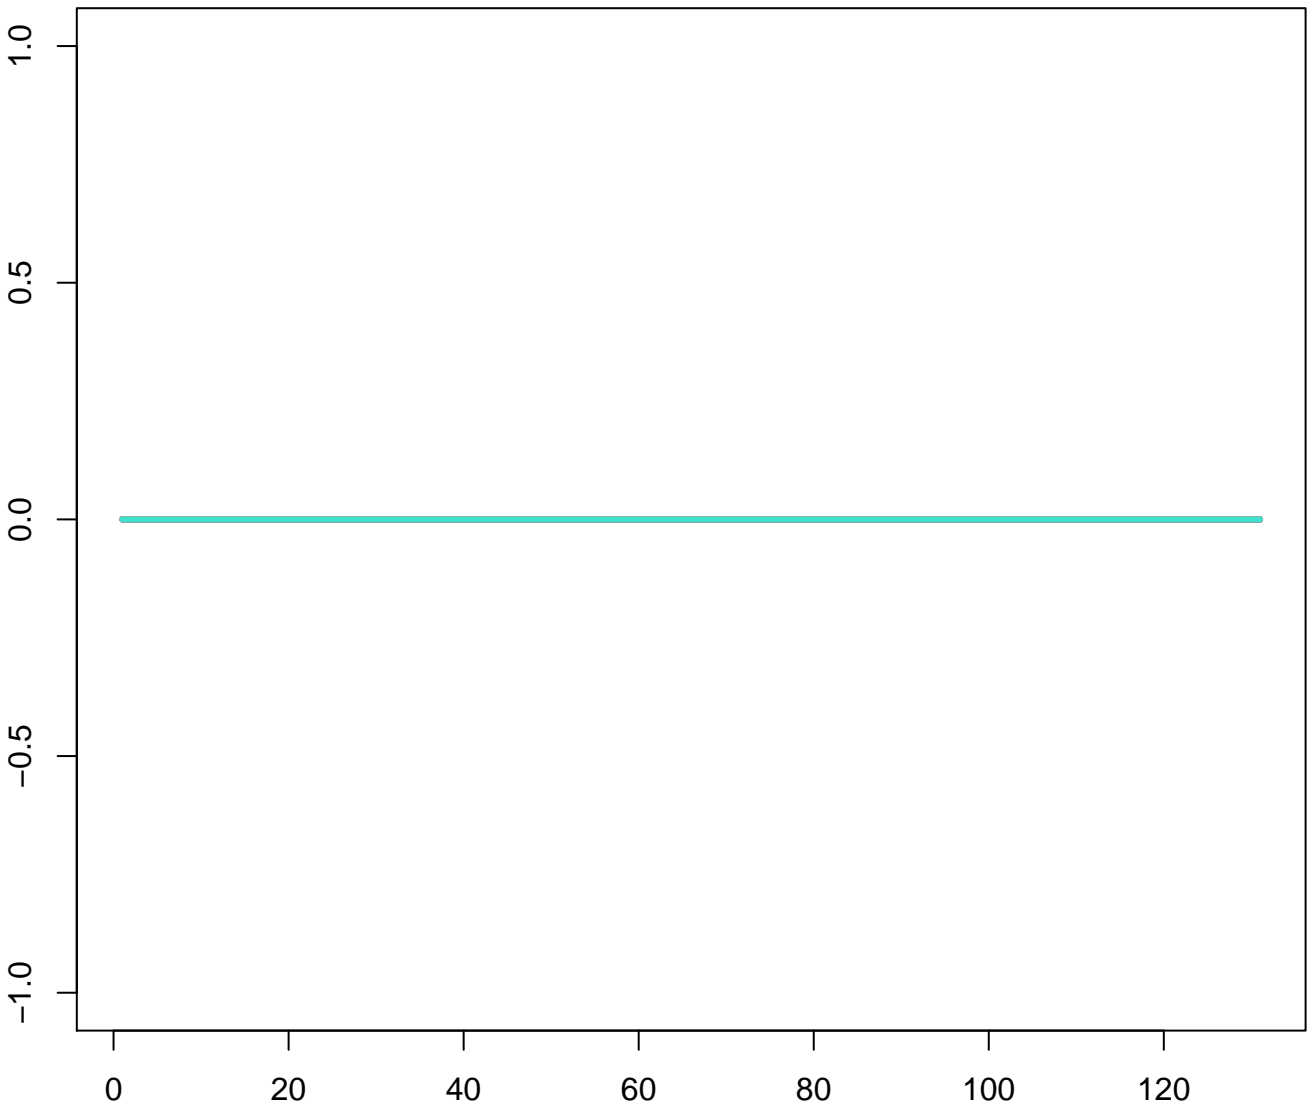

blood brain heart kidney lung ovary skin muscle testis

# 19\_16390623-16390701(+)\_mir-684\_low

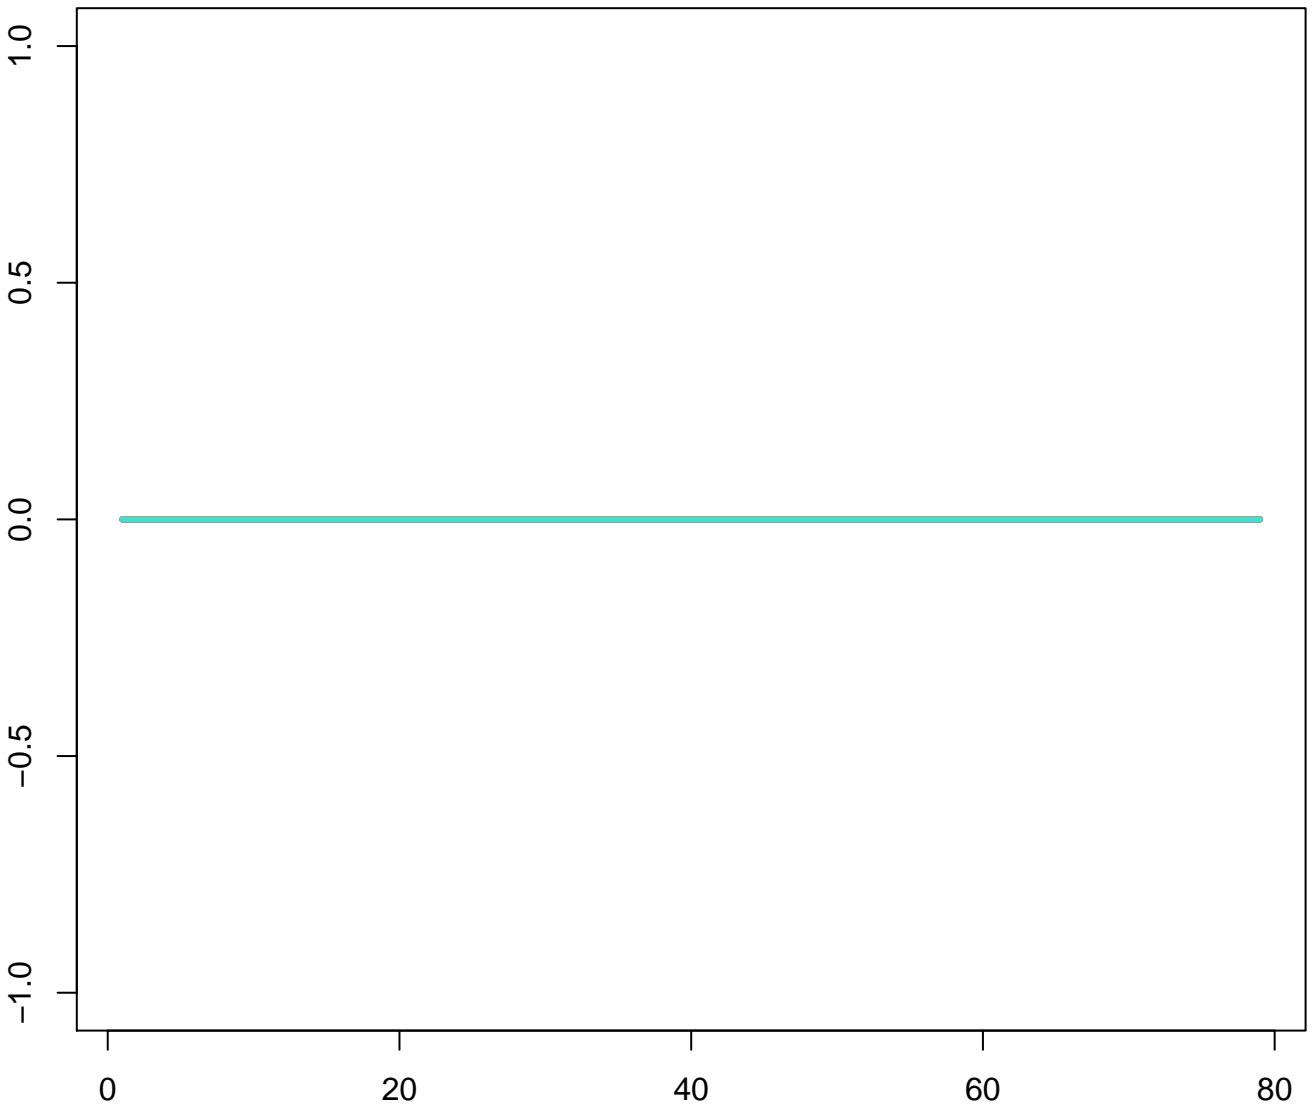

blood brain heart kidney lung ovary skin muscle testis

# 19\_38435956-38436011(+)\_cfa-mir-128-1\_high

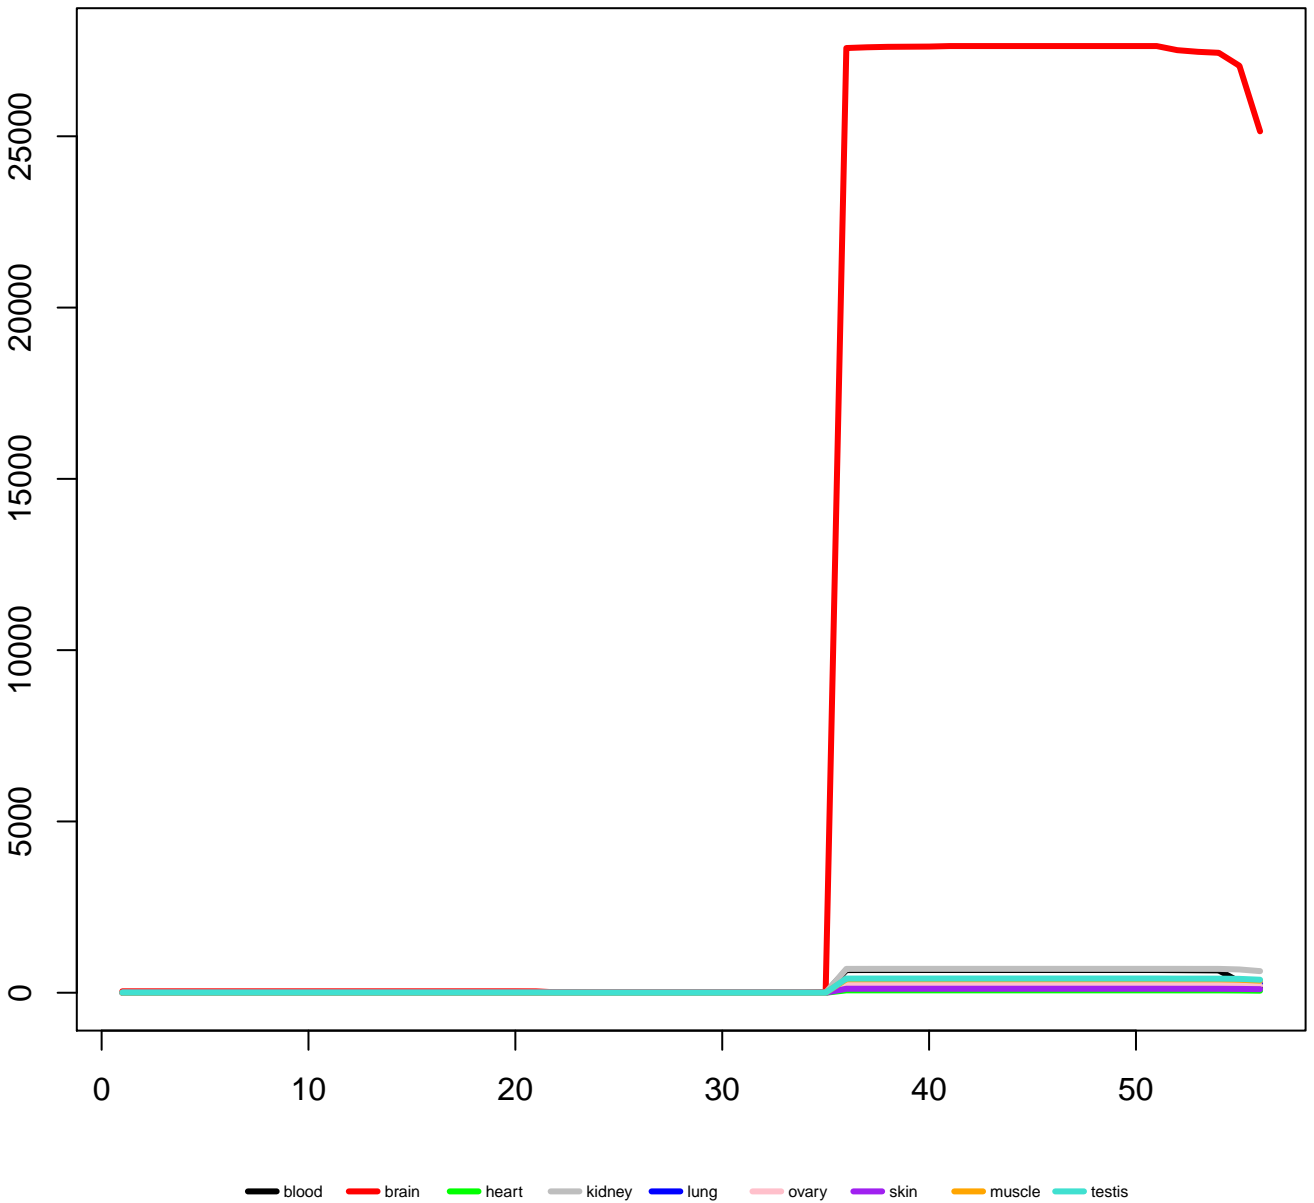

# 2\_1319449-1319518(+)\_mir-4683\_high

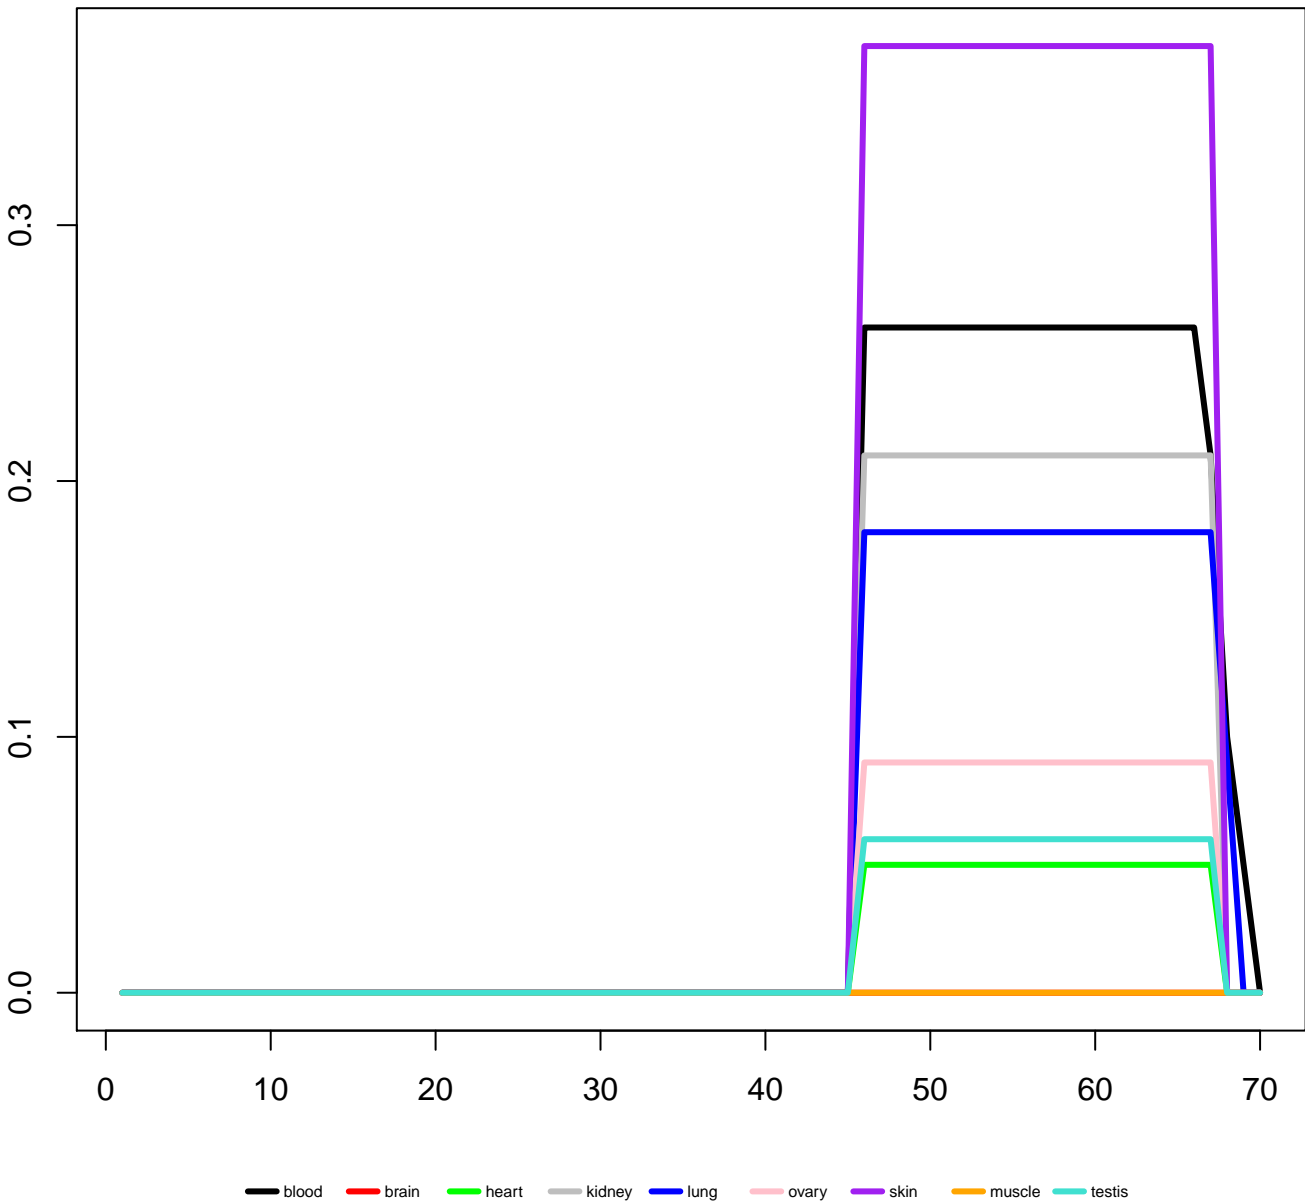



# 2\_4216693-4216805(+)\_cfa-mir-8864-1\_low

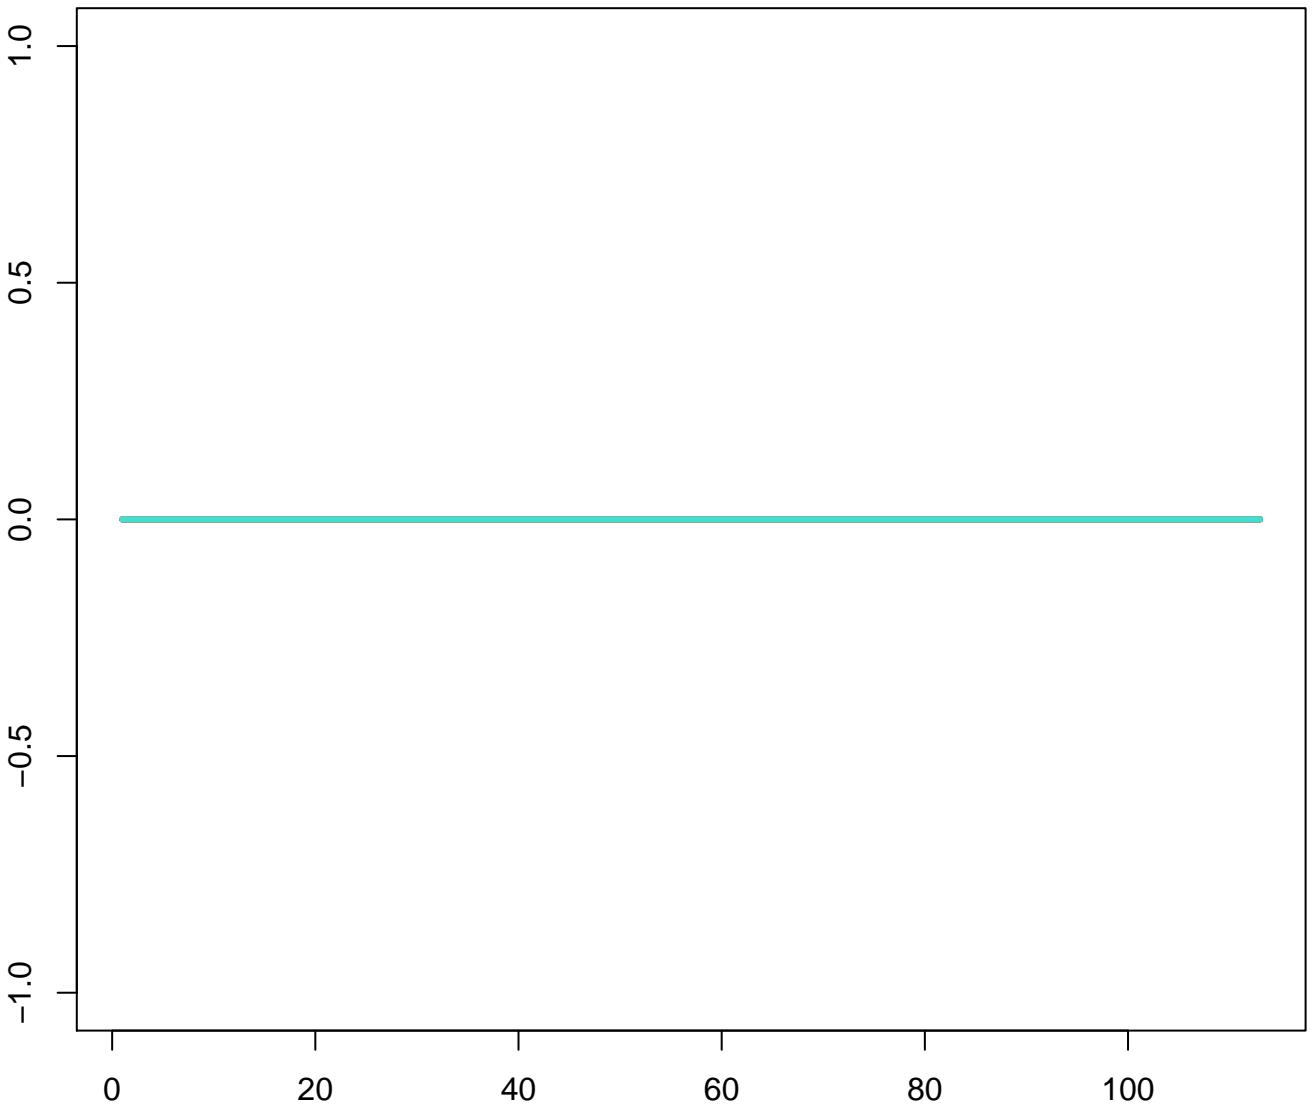

blood brain heart kidney lung ovary skin muscle testis

# 2\_4601780-4601892(-)\_cfa-mir-8864-4\_low



blood brain heart kidney lung ovary skin muscle testis

# 2\_5658031-5658143(-)\_cfa-mir-8864-3\_low



blood brain heart kidney lung ovary skin muscle testis

# 2\_6435916-6436025(-)\_mir-8864\_low

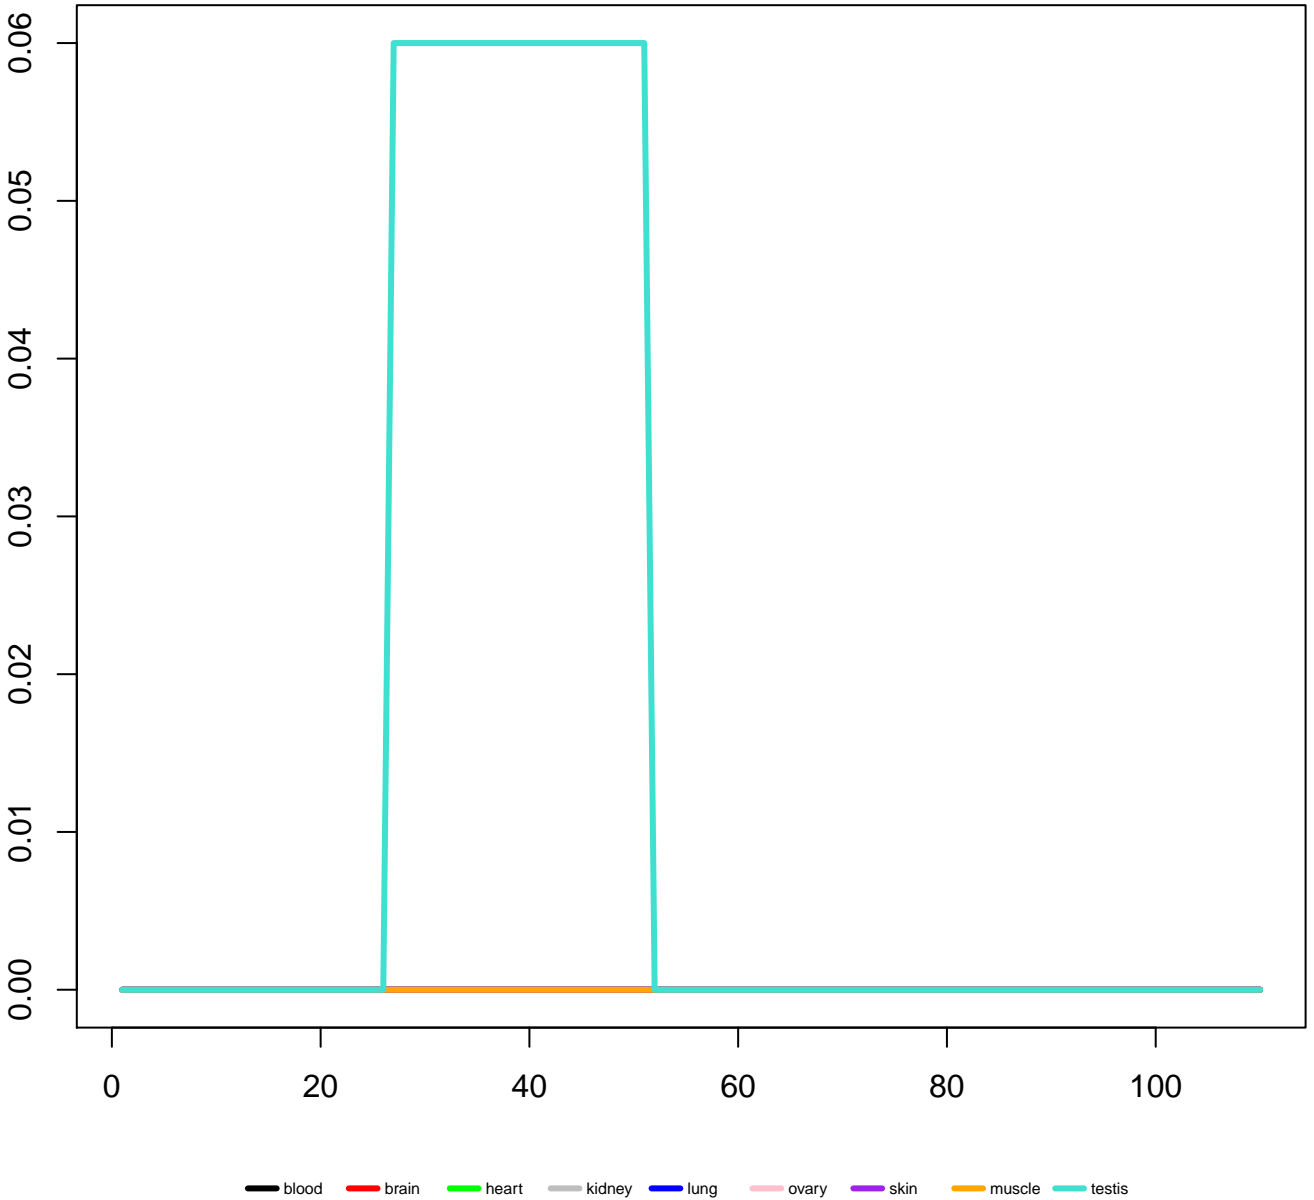

# 2\_14591216-14591298(+)\_mir-1893\_low

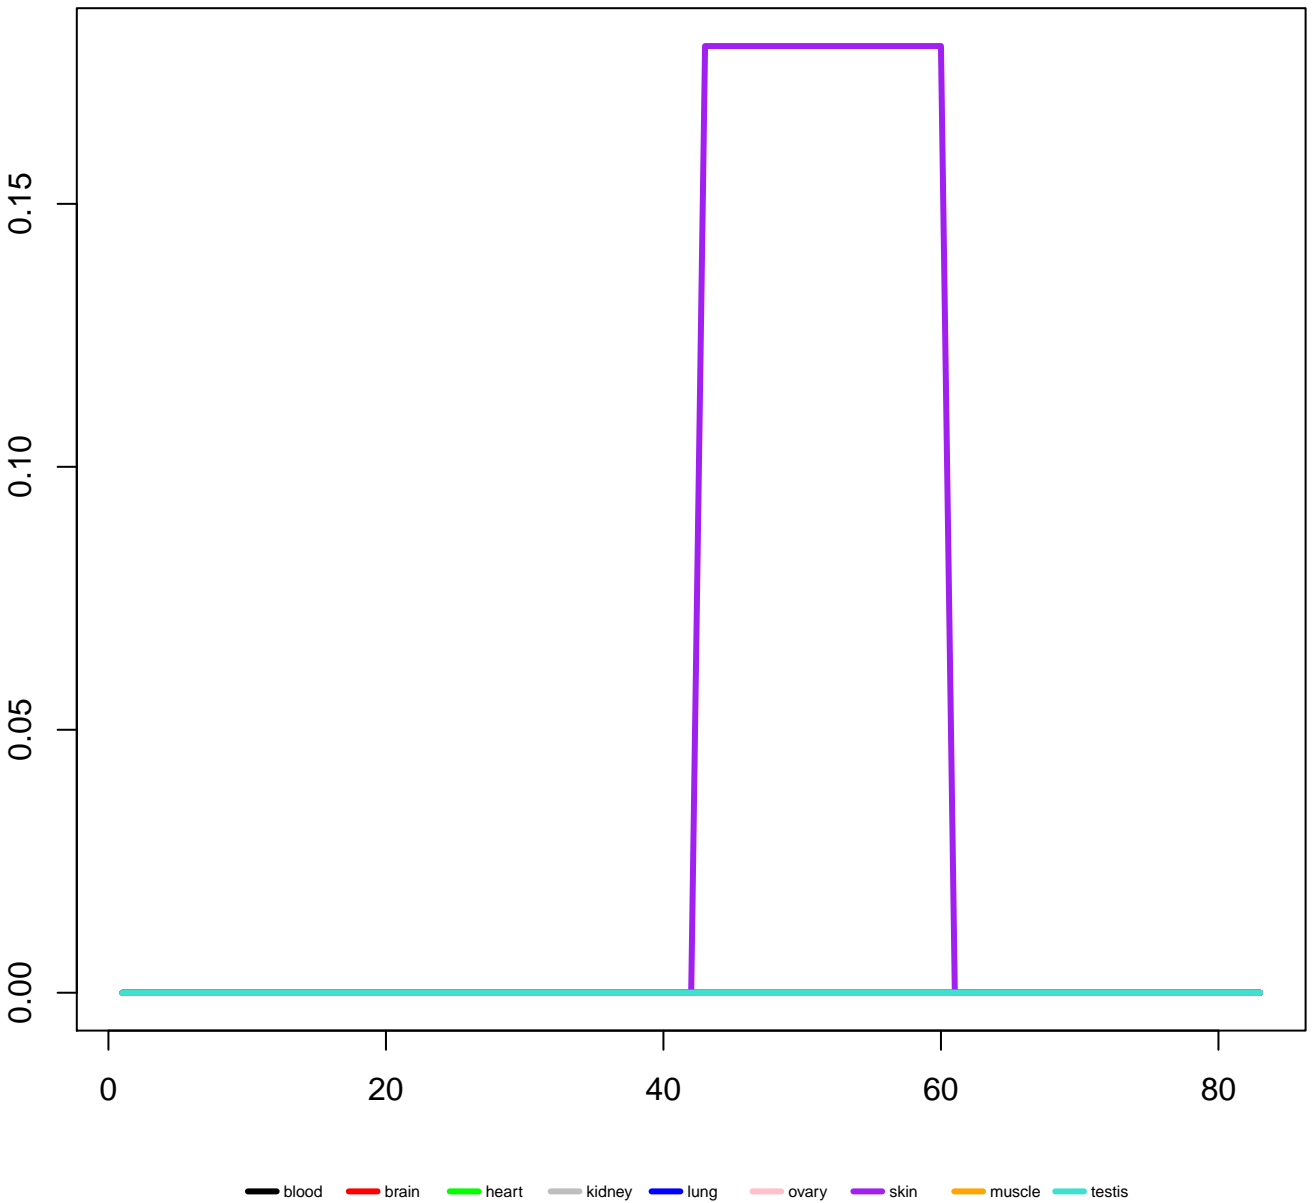

# 2\_18383163-18383272(-)\_mir-8864\_low

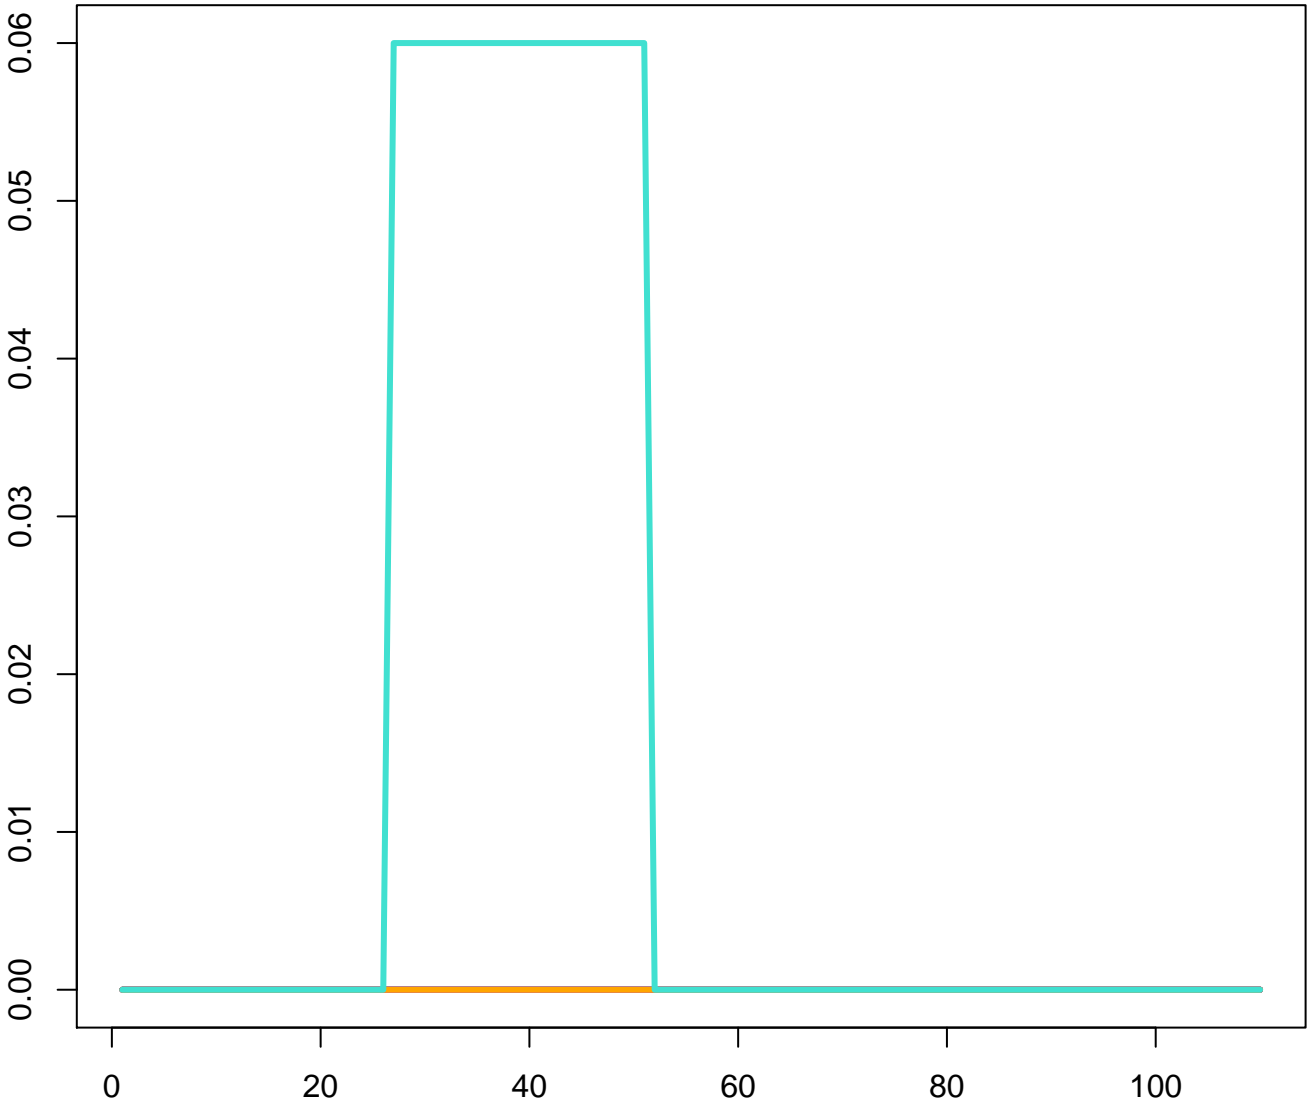

blood brain heart kidney lung ovary skin muscle testis

# 2\_18385514-18385658(-)\_cfa-mir-8895\_low

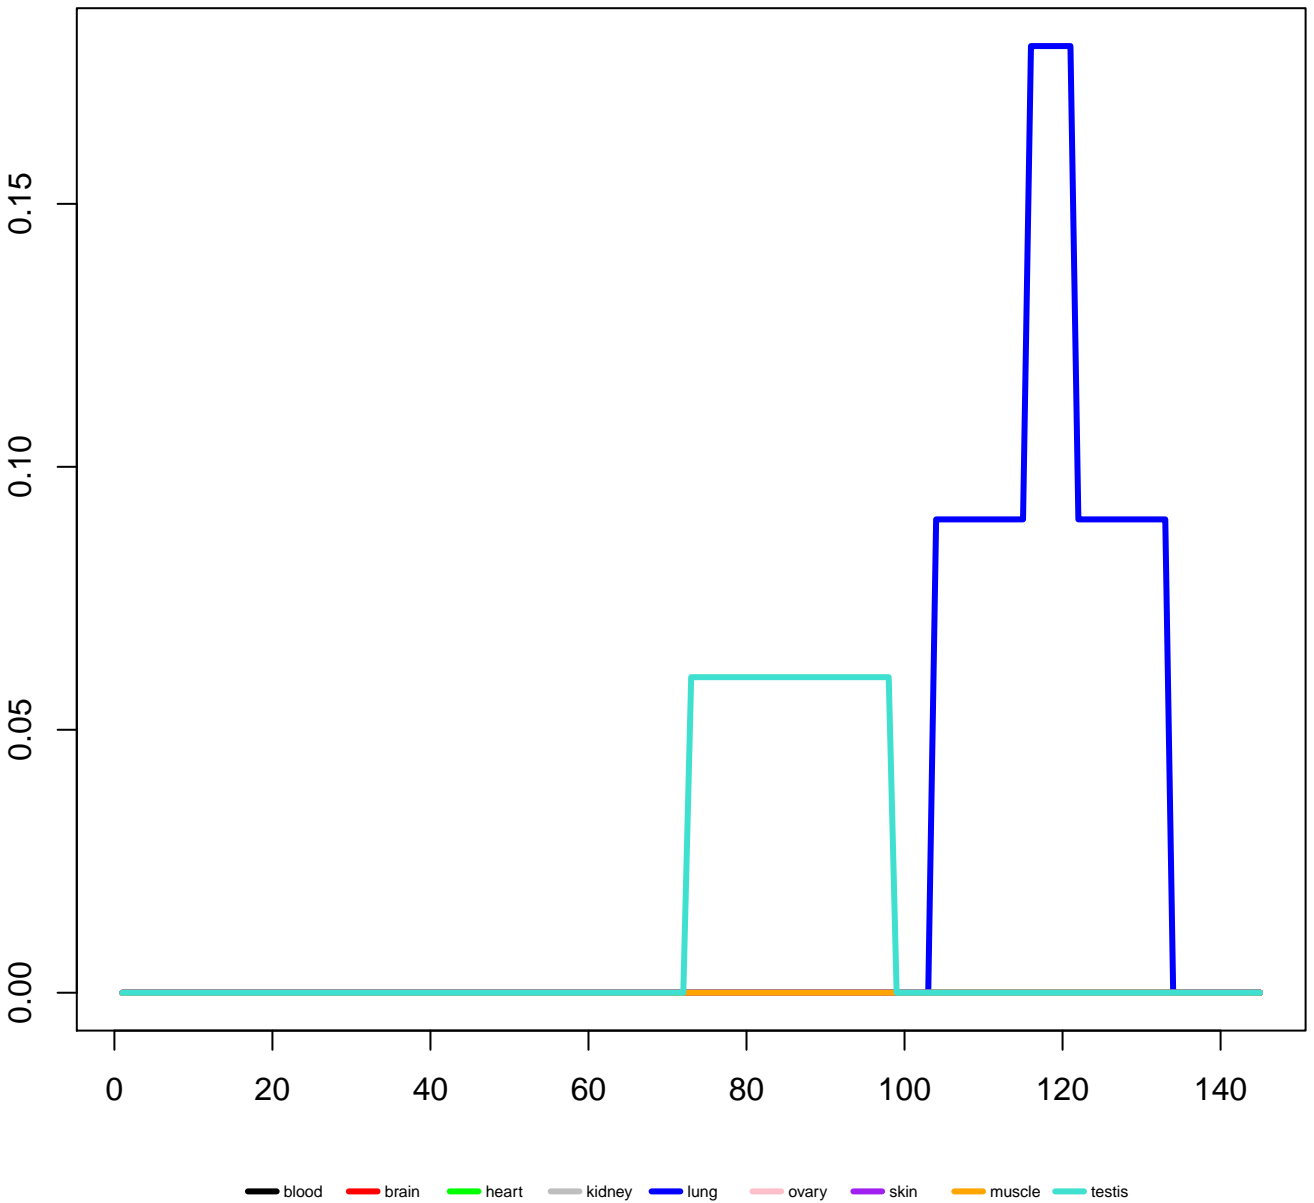

# 2\_22199888-22199965(+)\_mir-4293\_low

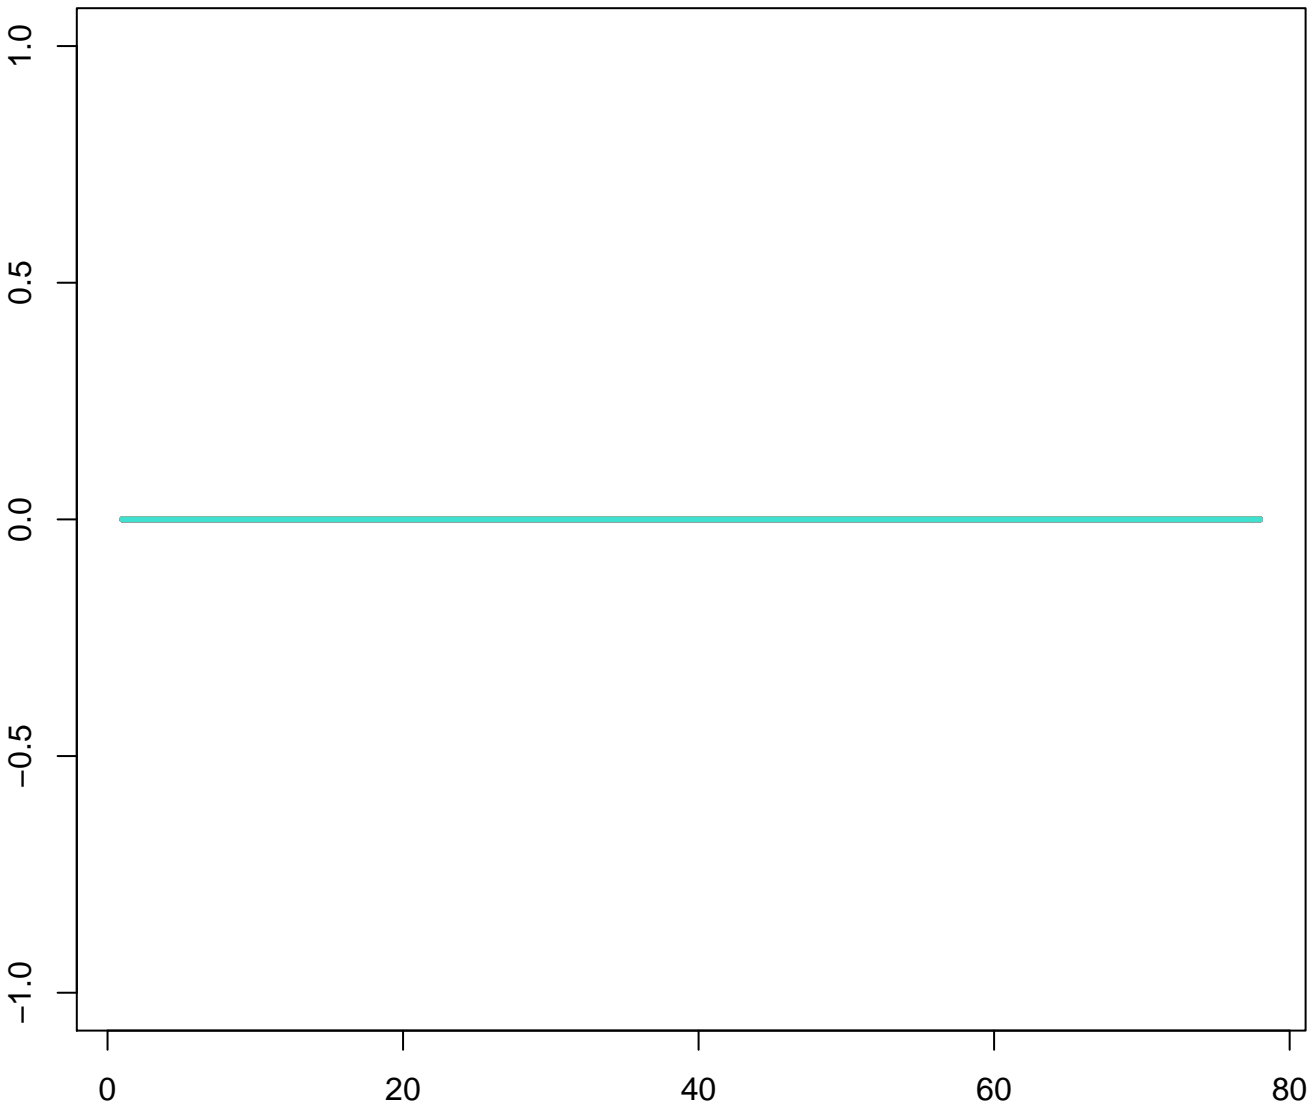

blood brain heart kidney lung ovary skin muscle testis



# 2\_37910194-37910259(+)\_mir-9162\_low

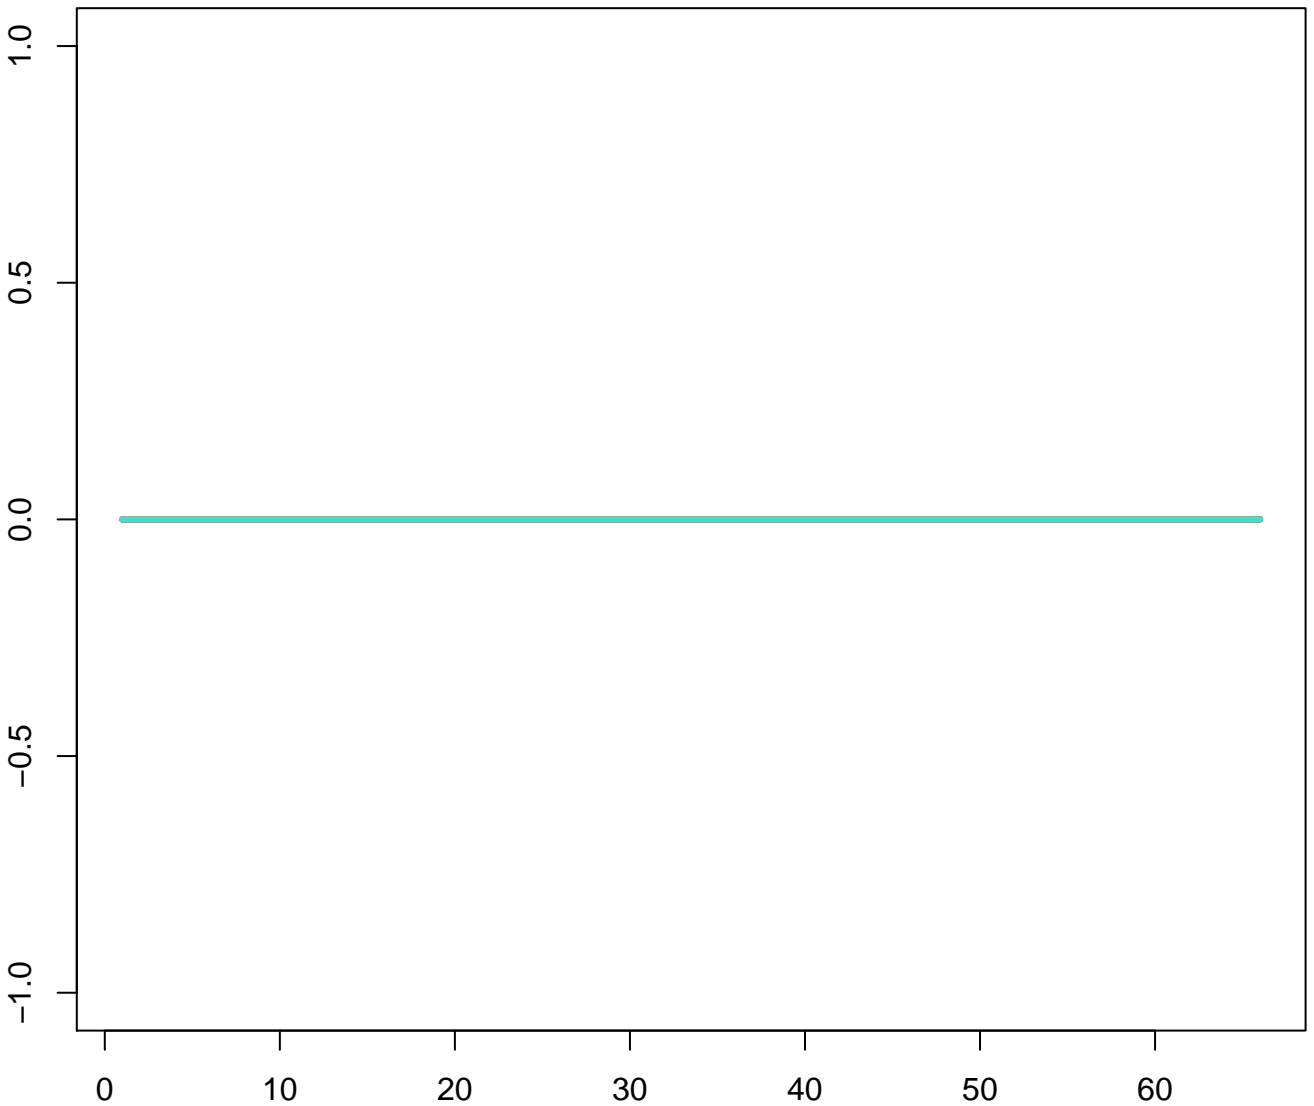

blood brain heart kidney lung ovary skin muscle testis

# 2\_42541949-42542039(-)\_cfa-mir-449a\_high

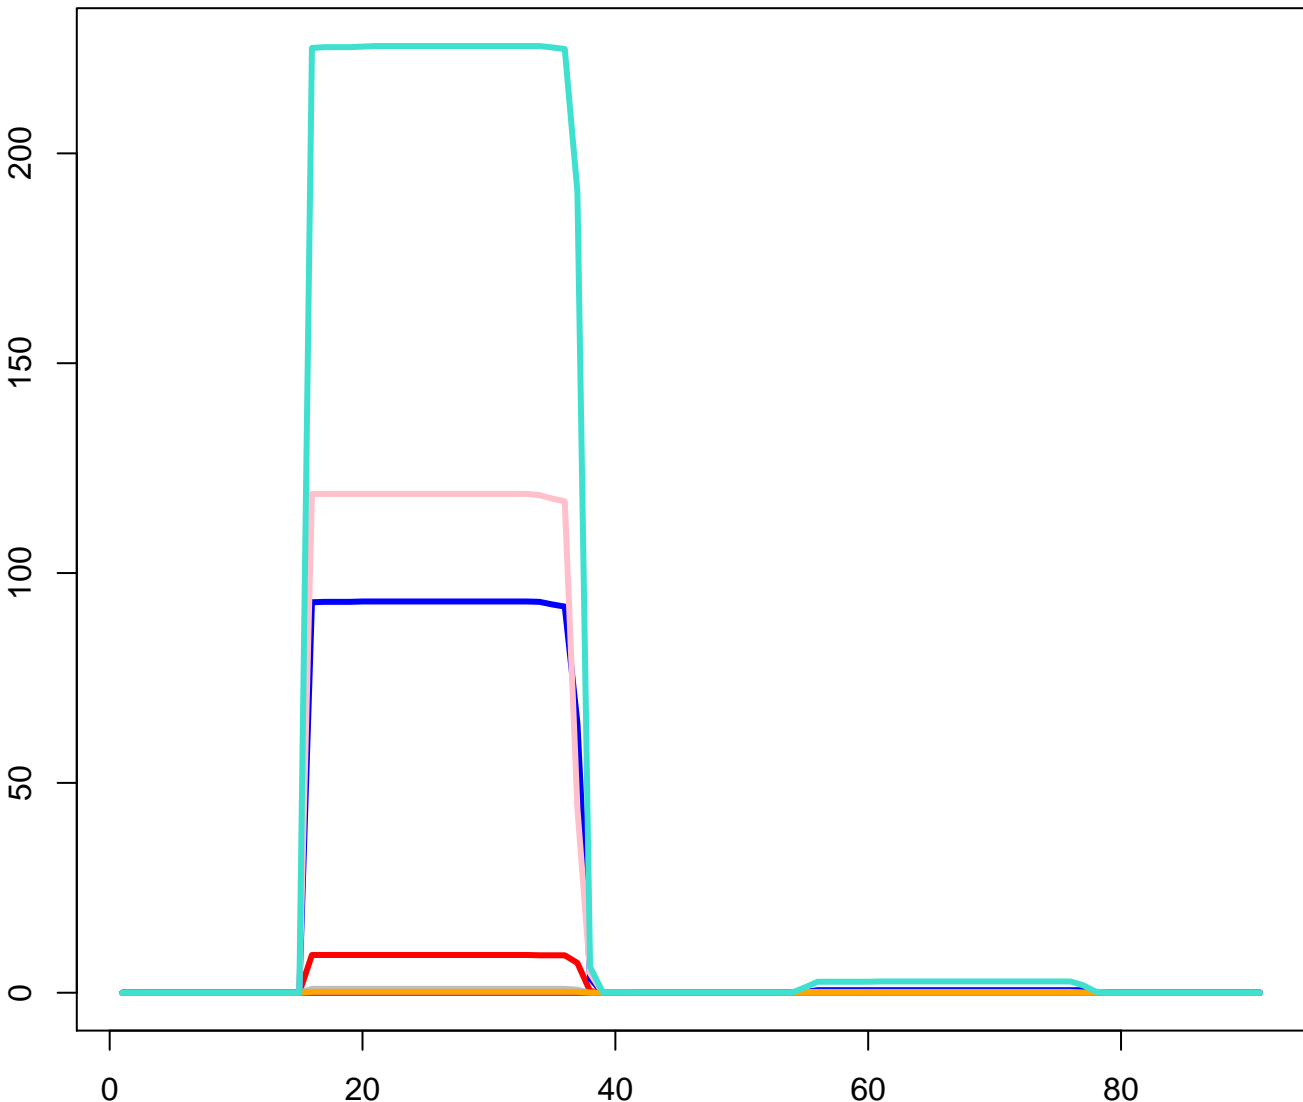

— blood — brain — heart — kidney — lung — ovary — skin — muscle — testis

# 2\_42542049-42542177(-)\_cfa-mir-449b\_high

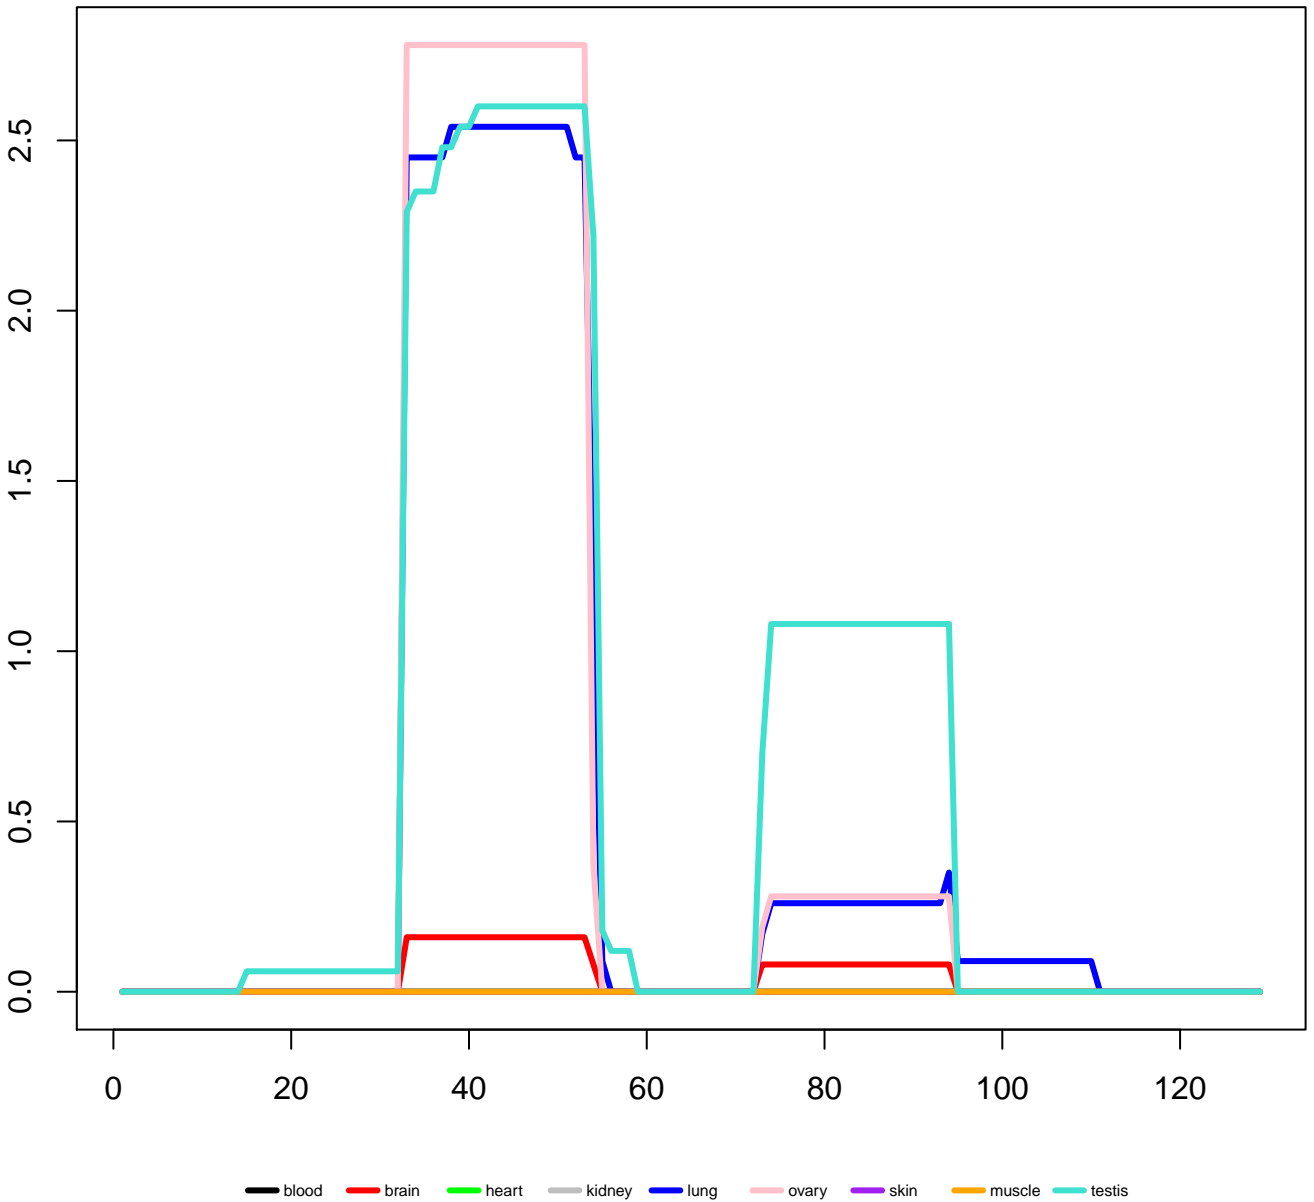

# 2\_46497270-46497350(-)\_cfa-mir-582\_high

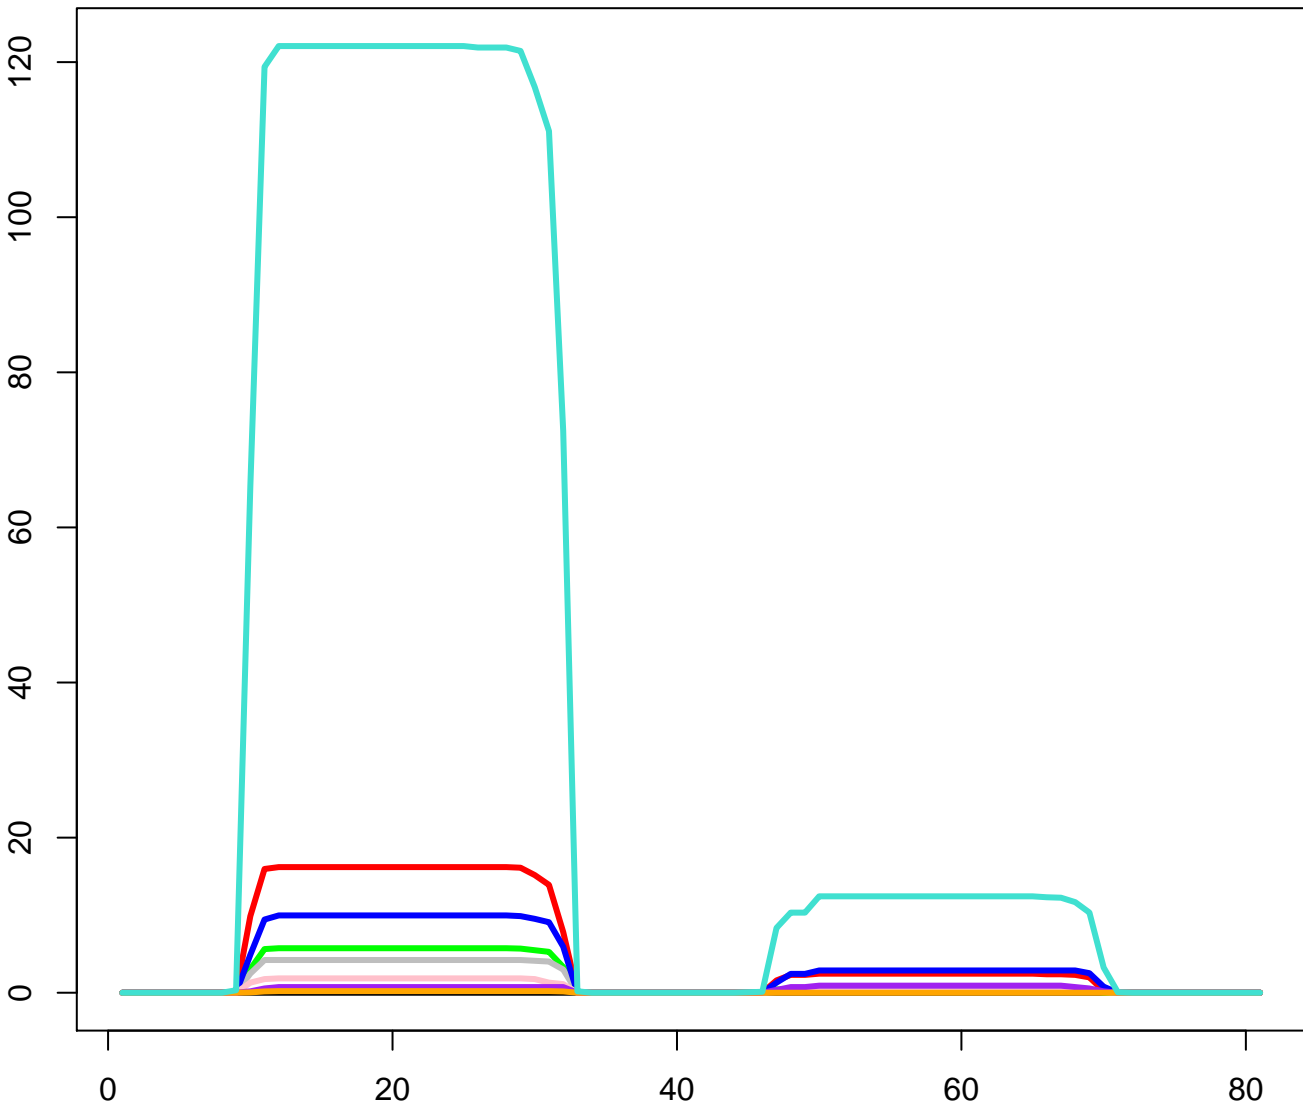

— blood — brain — heart — kidney — lung — ovary — skin — muscle — testis



# 2\_59454083-59454151(-)\_cfa-mir-138b\_high

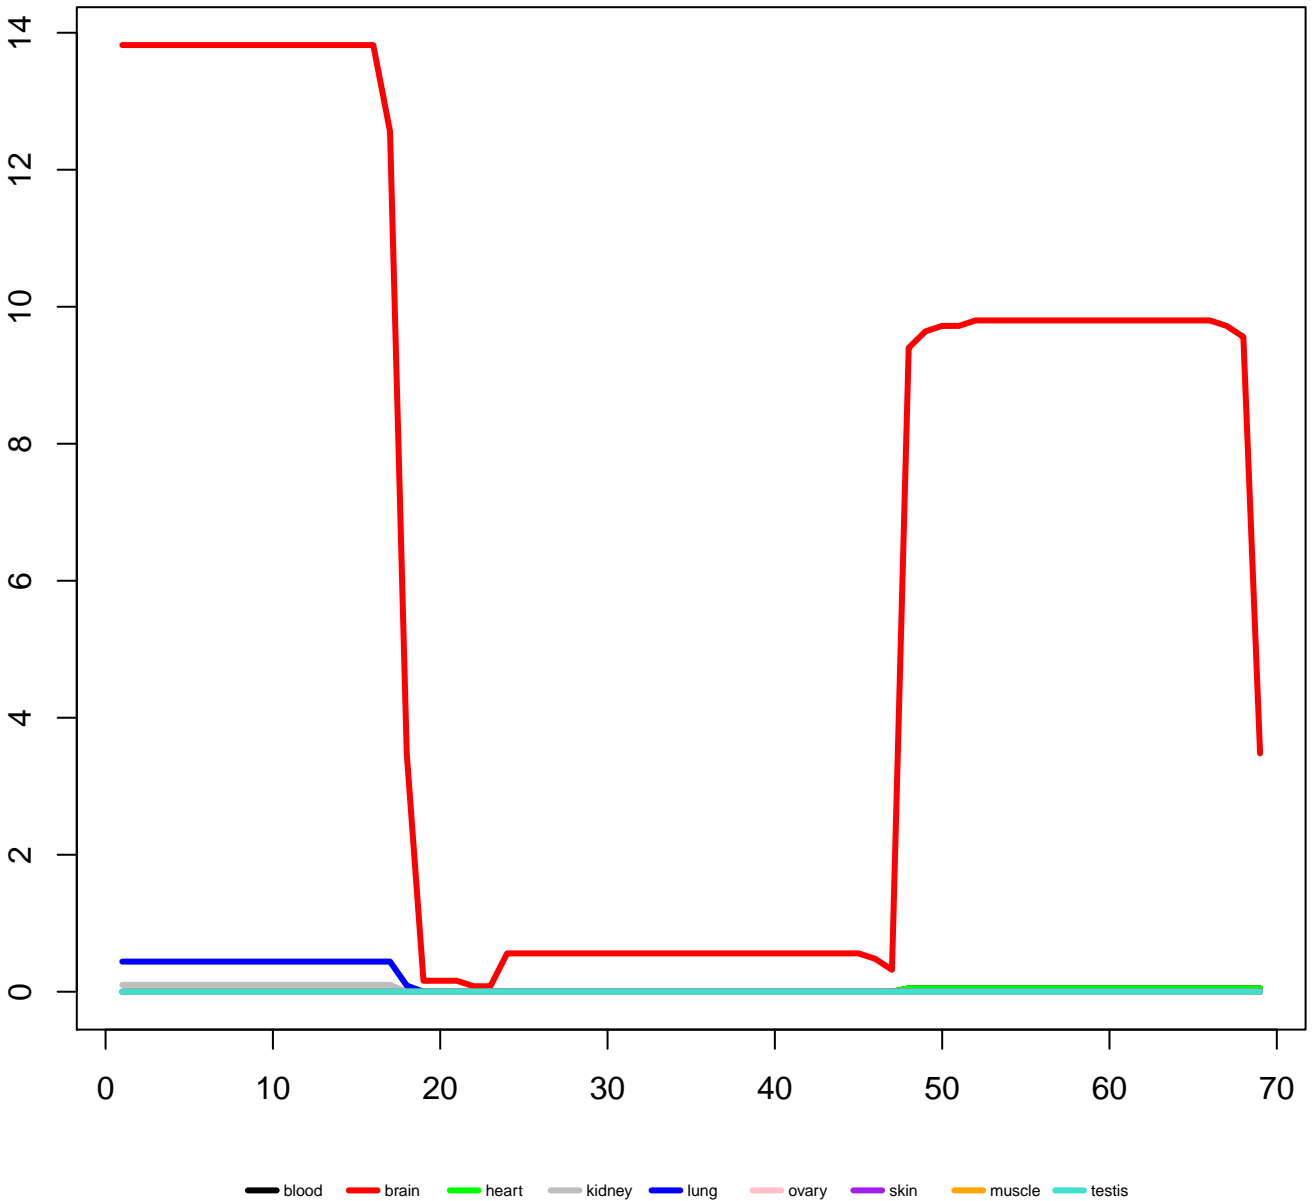



# 2\_76050573-76050717(+)\_cfa-mir-8897\_low

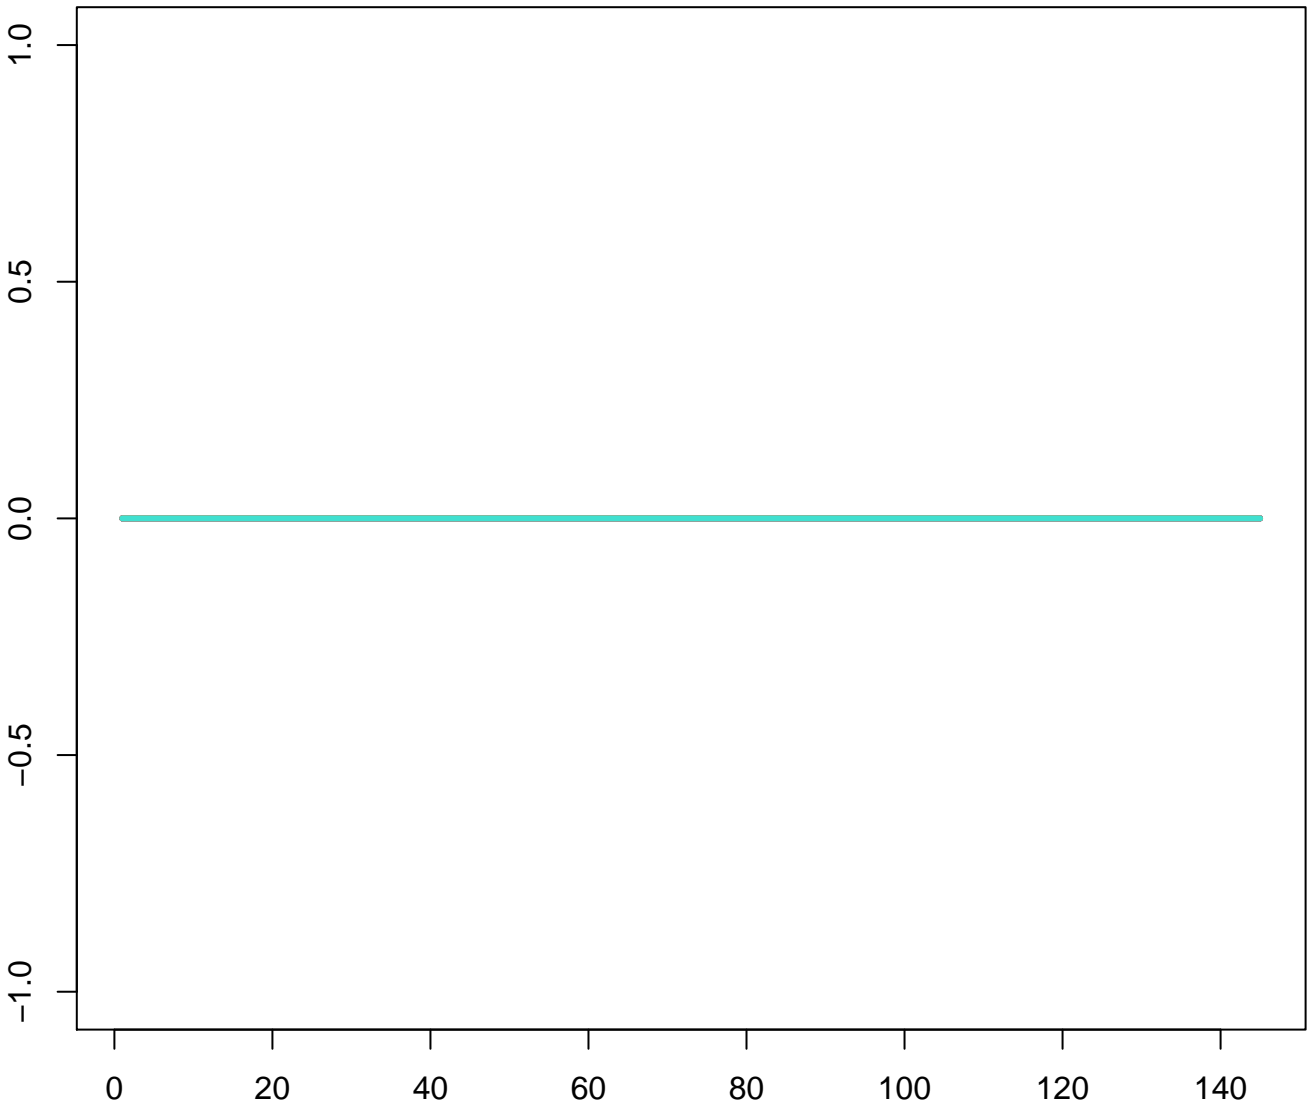

— blood — brain — heart — kidney — lung — ovary — skin — muscle — testis



# 2\_76351689-76351756(-)\_mir-3115\_low



# 2\_83927298-83927408(-)\_cfa-mir-8896\_low

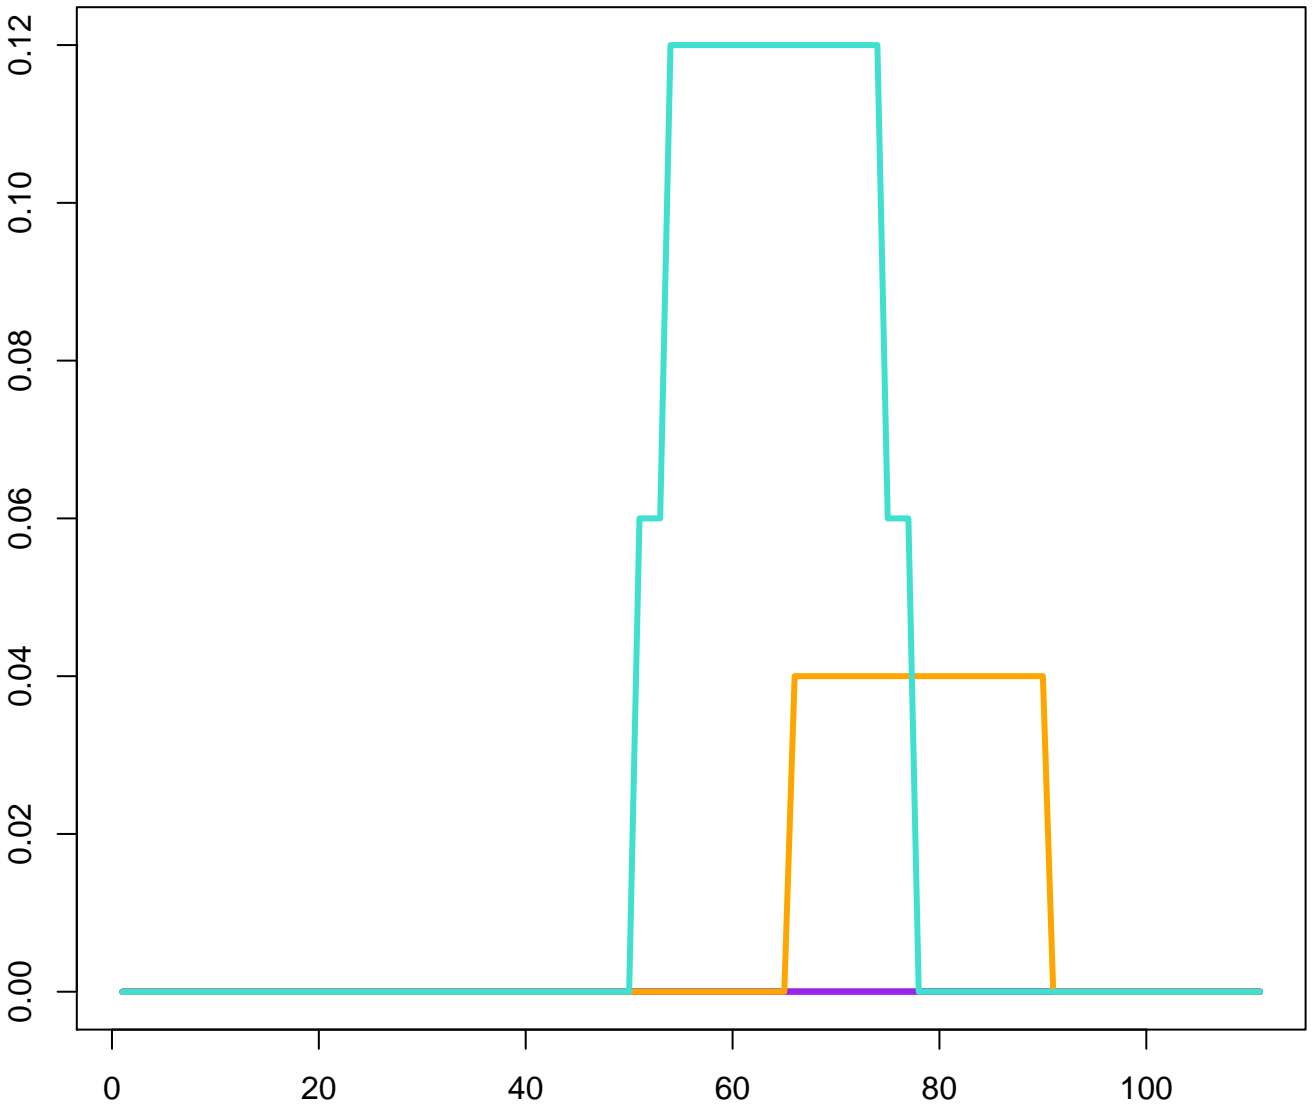

blood brain heart kidney lung ovary skin muscle testis

# 2\_84472247-84472381(-)\_cfa-mir-8894\_low

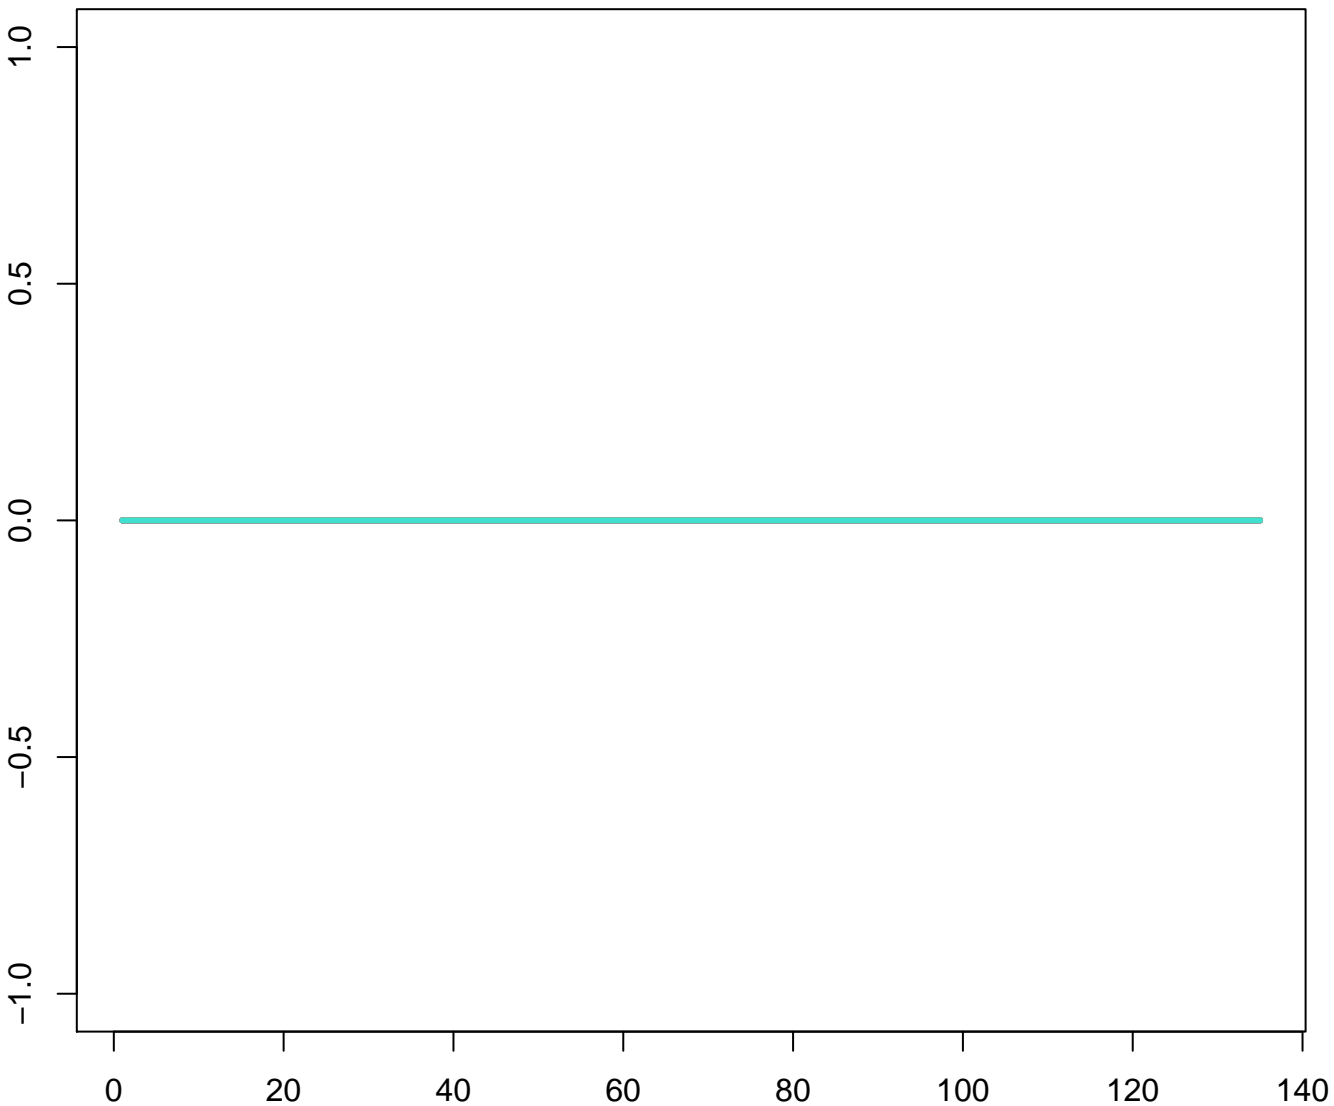

blood brain heart kidney lung ovary skin muscle testis

# 20\_7968529-7968602(+)\_cfa-mir-885\_high

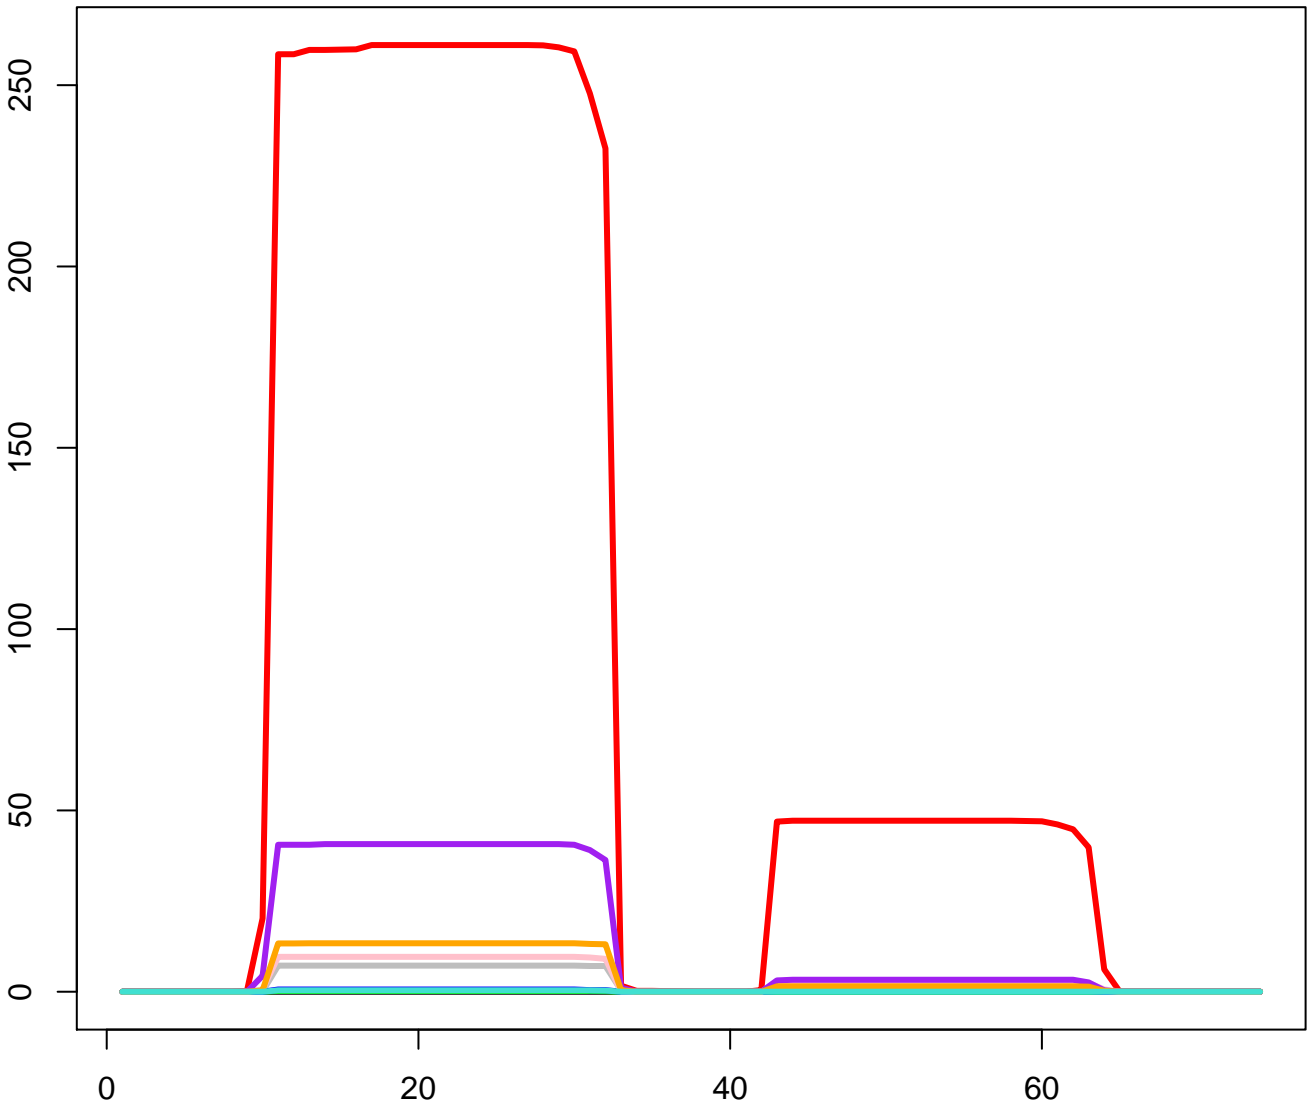

— blood — brain — heart — kidney — lung — ovary — skin — muscle — testis

# 20\_19236073-19236143(+)\_mir-9260\_low

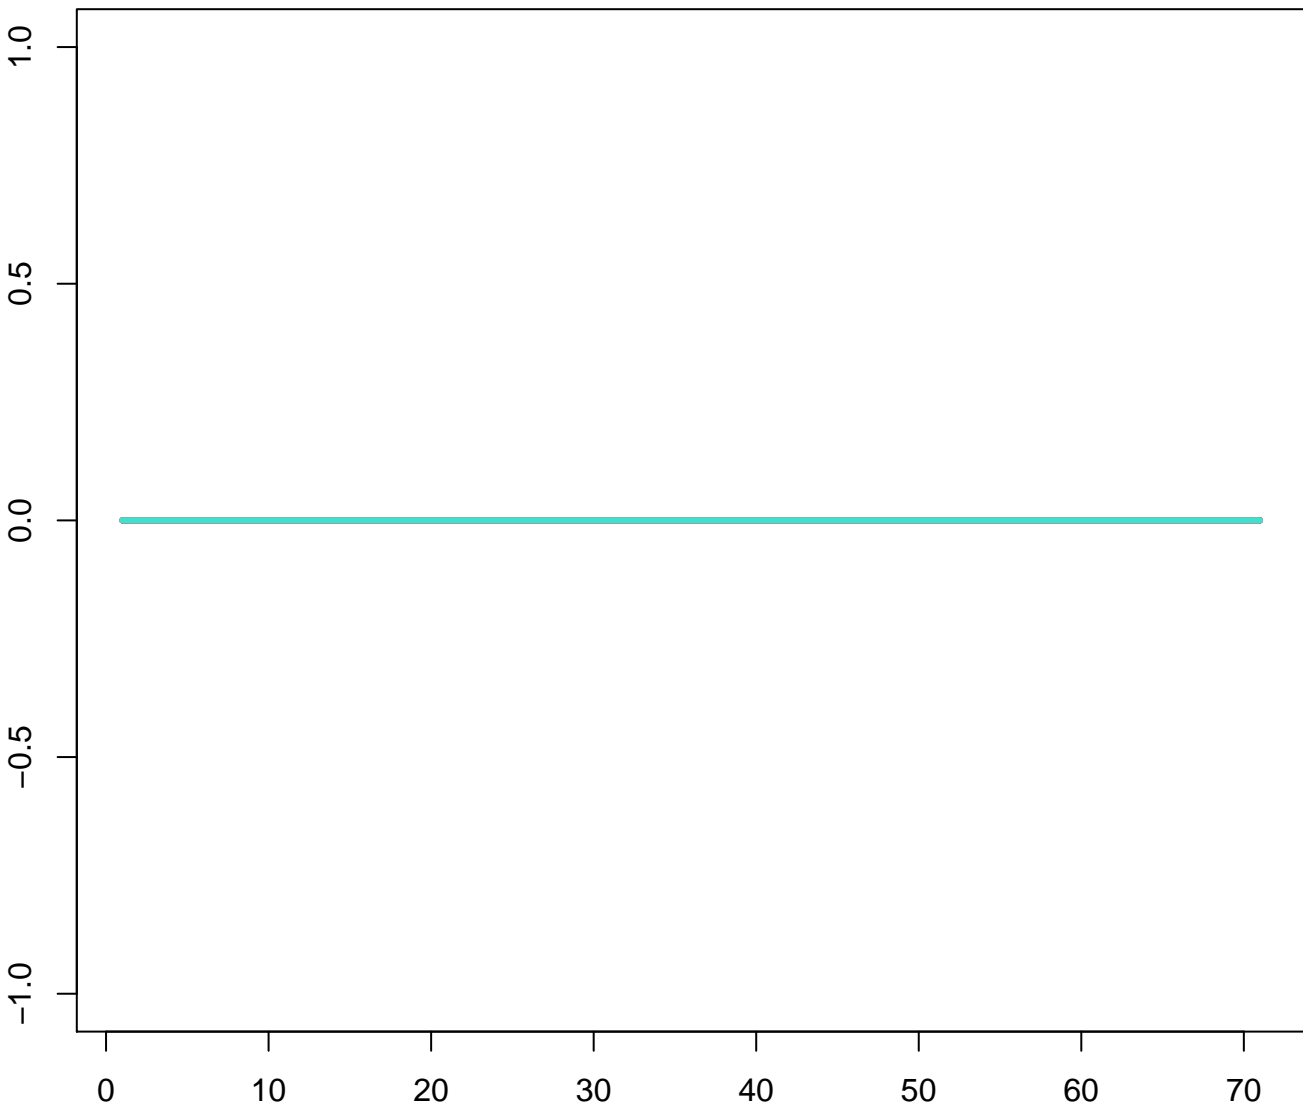

blood brain heart kidney lung ovary skin muscle testis

# 20\_20479023-20479139(+)\_mir-1284\_low

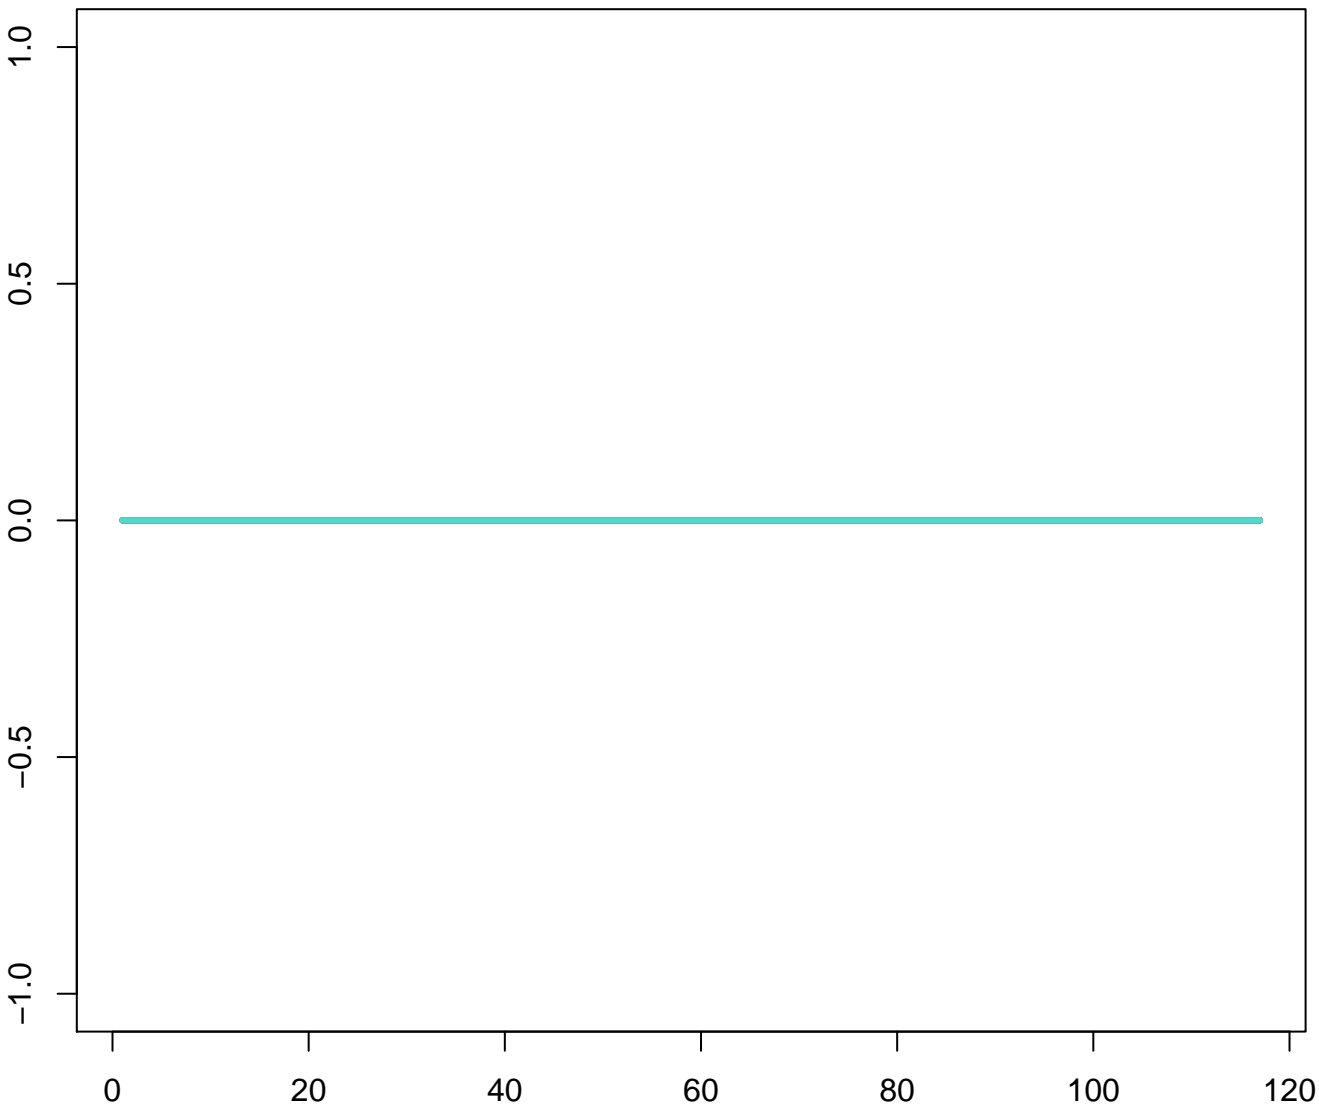

blood brain heart kidney lung ovary skin muscle testis

# 20\_37461817-37461903(+)\_cfa-mir-135a-1\_high

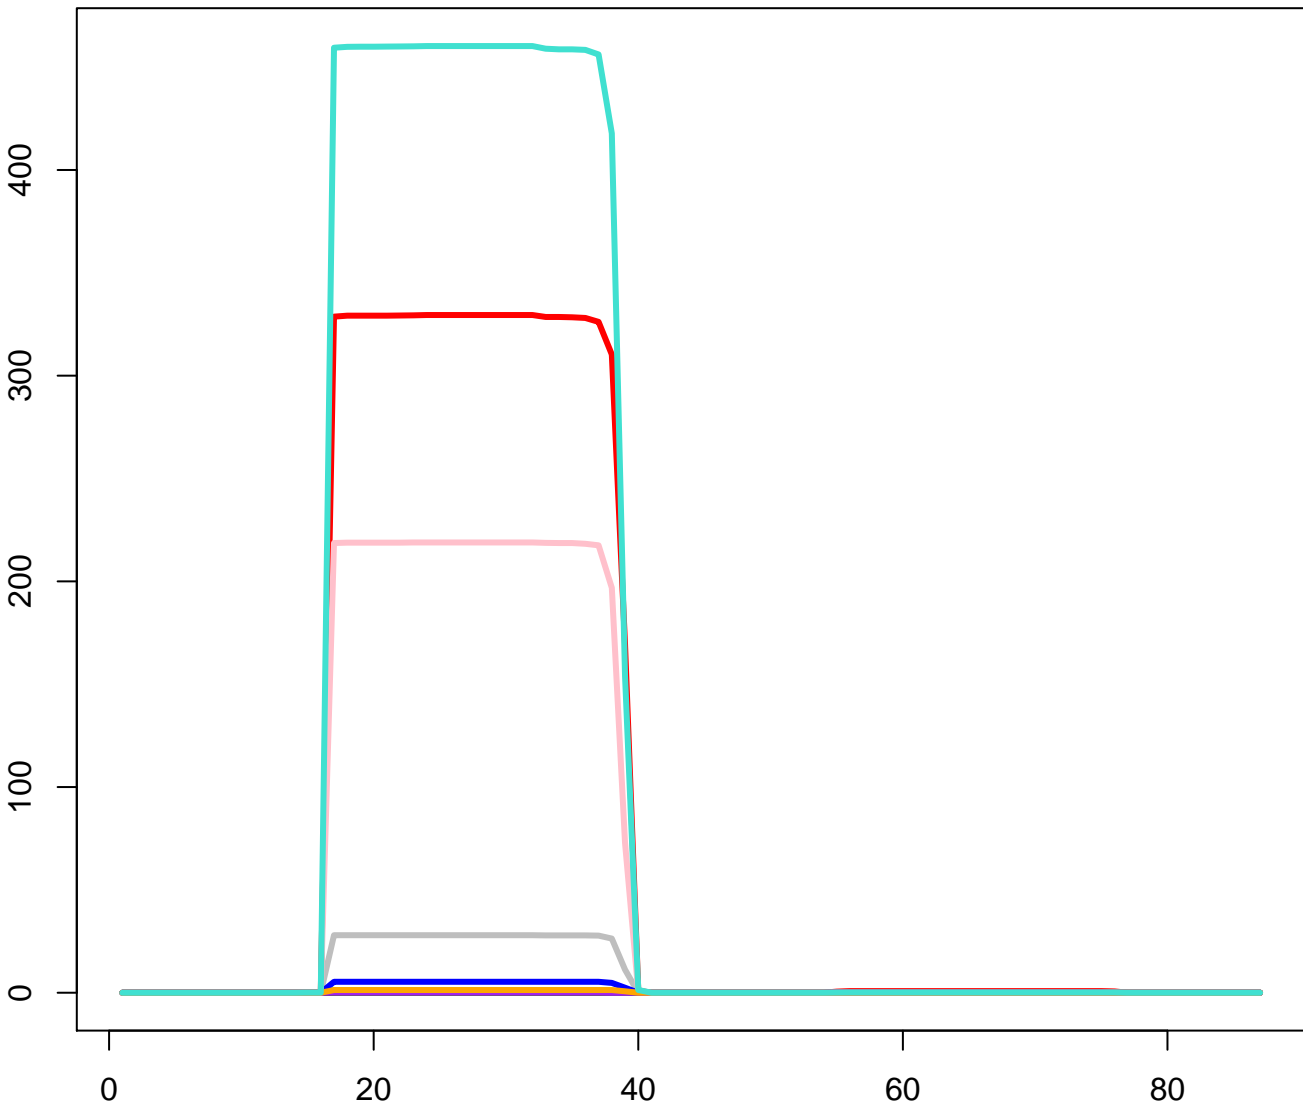

— blood — brain — heart — kidney — lung — ovary — skin — muscle — testis

# 20\_37501074-37501152(+)\_cfa-let-7g\_high

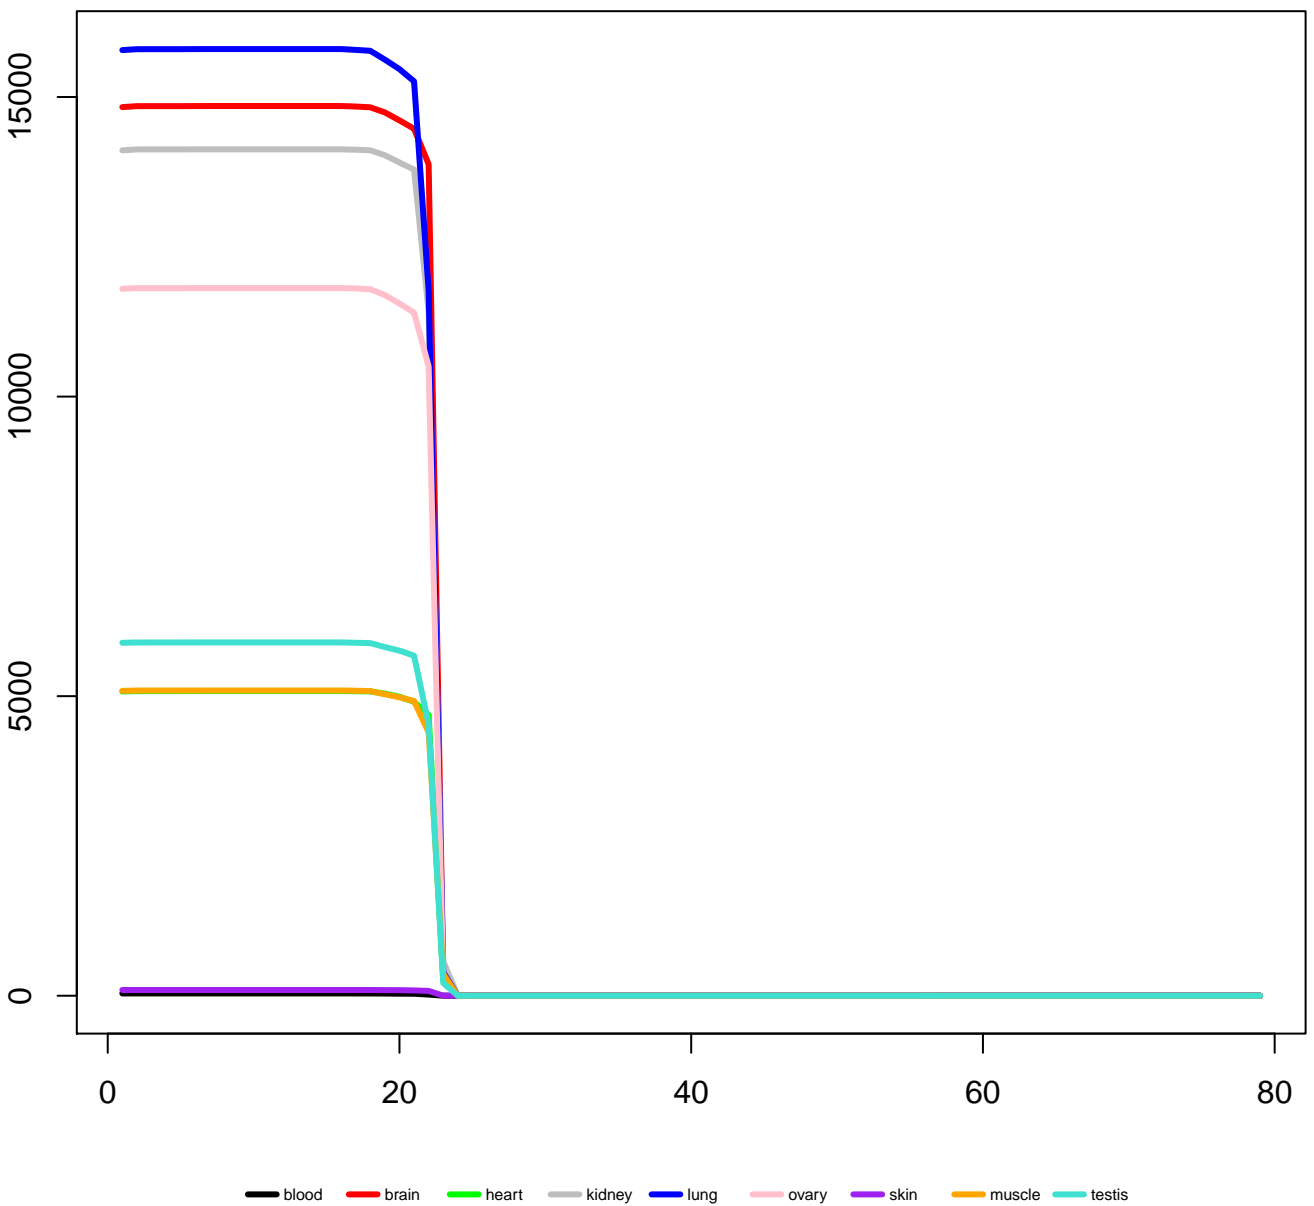



# 20\_37964390-37964514(-)\_cfa-mir-8800\_low

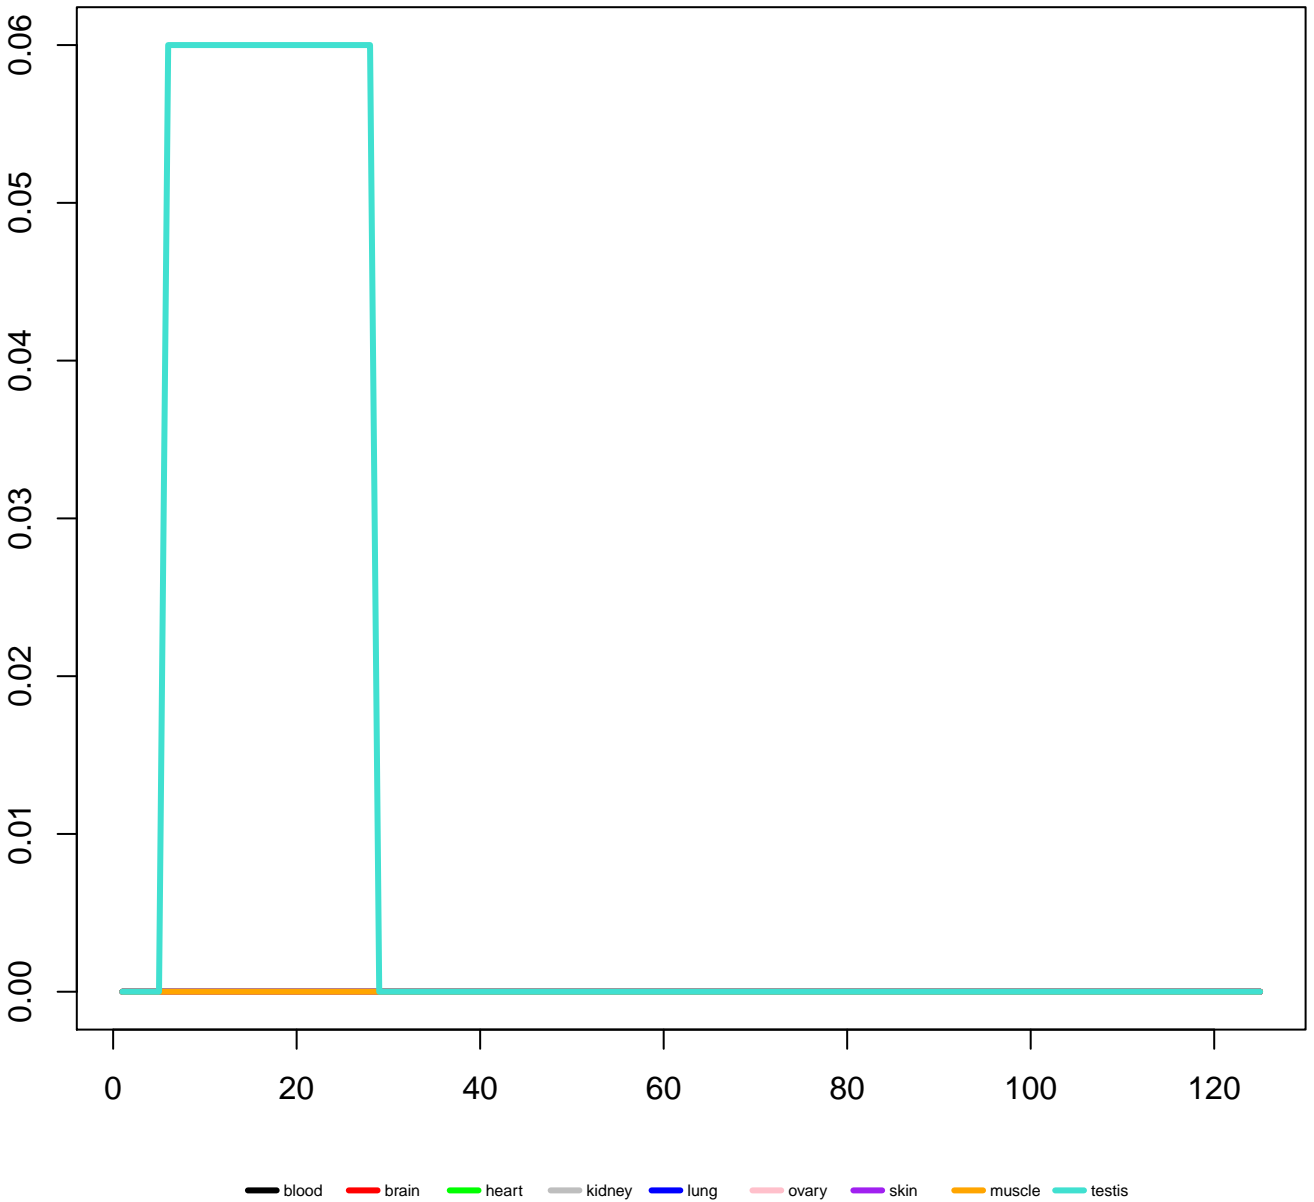

# 20\_38527785-38527877(+)\_cfa-mir-8799a\_low

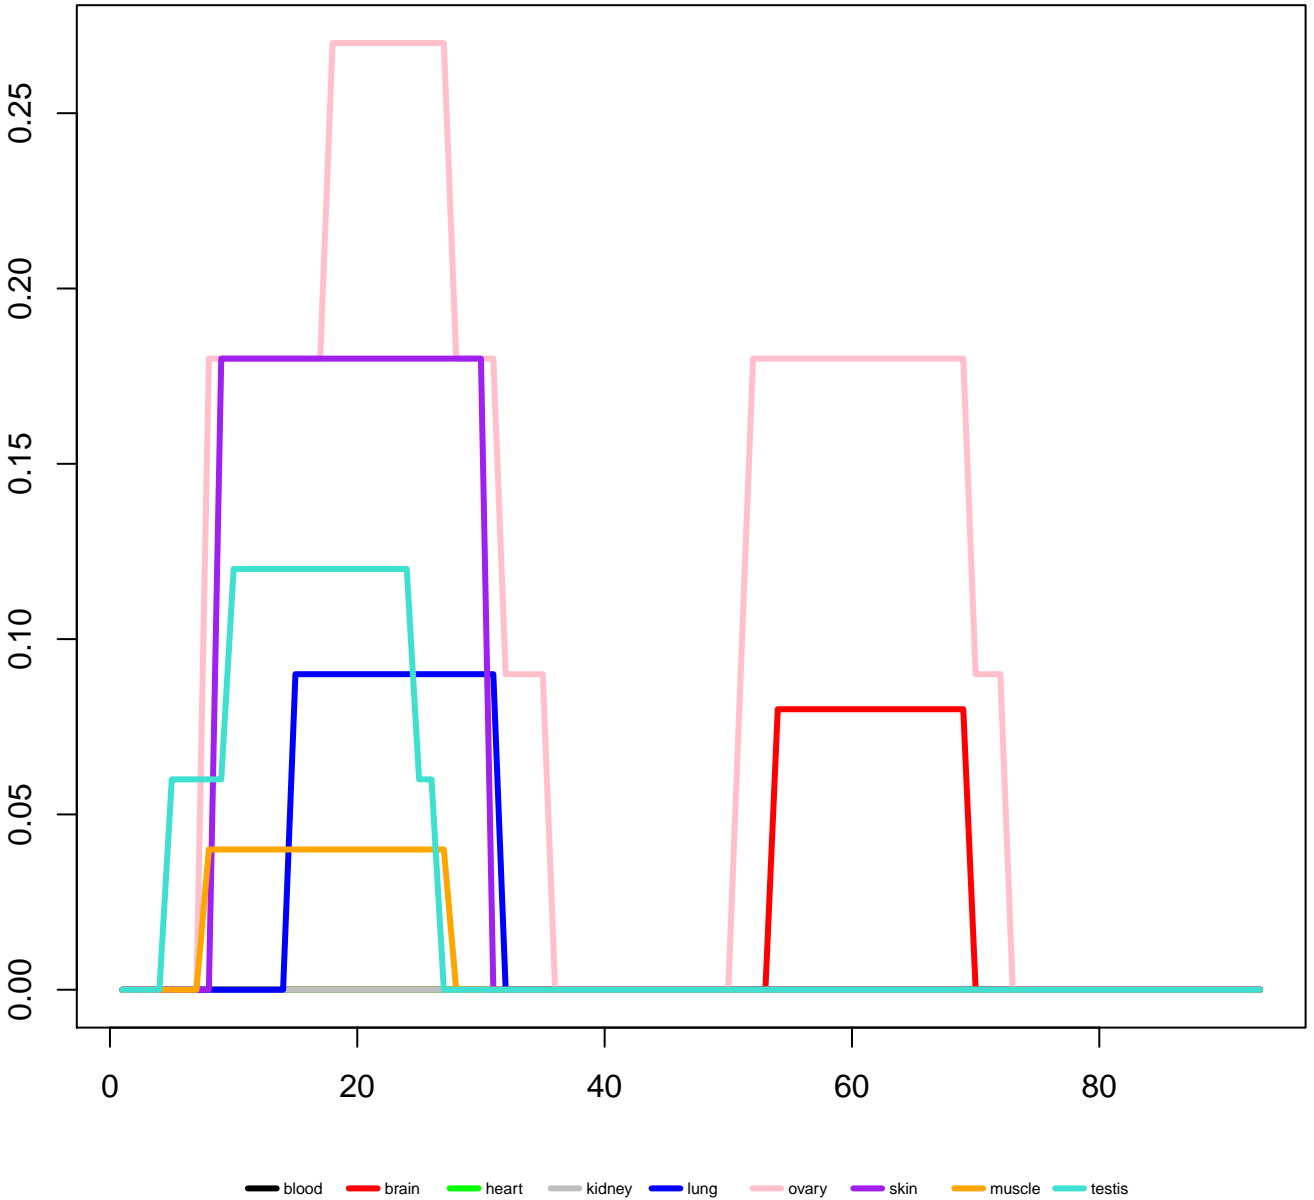

# 20\_40144135-40144198(+)\_cfa-mir-191\_high

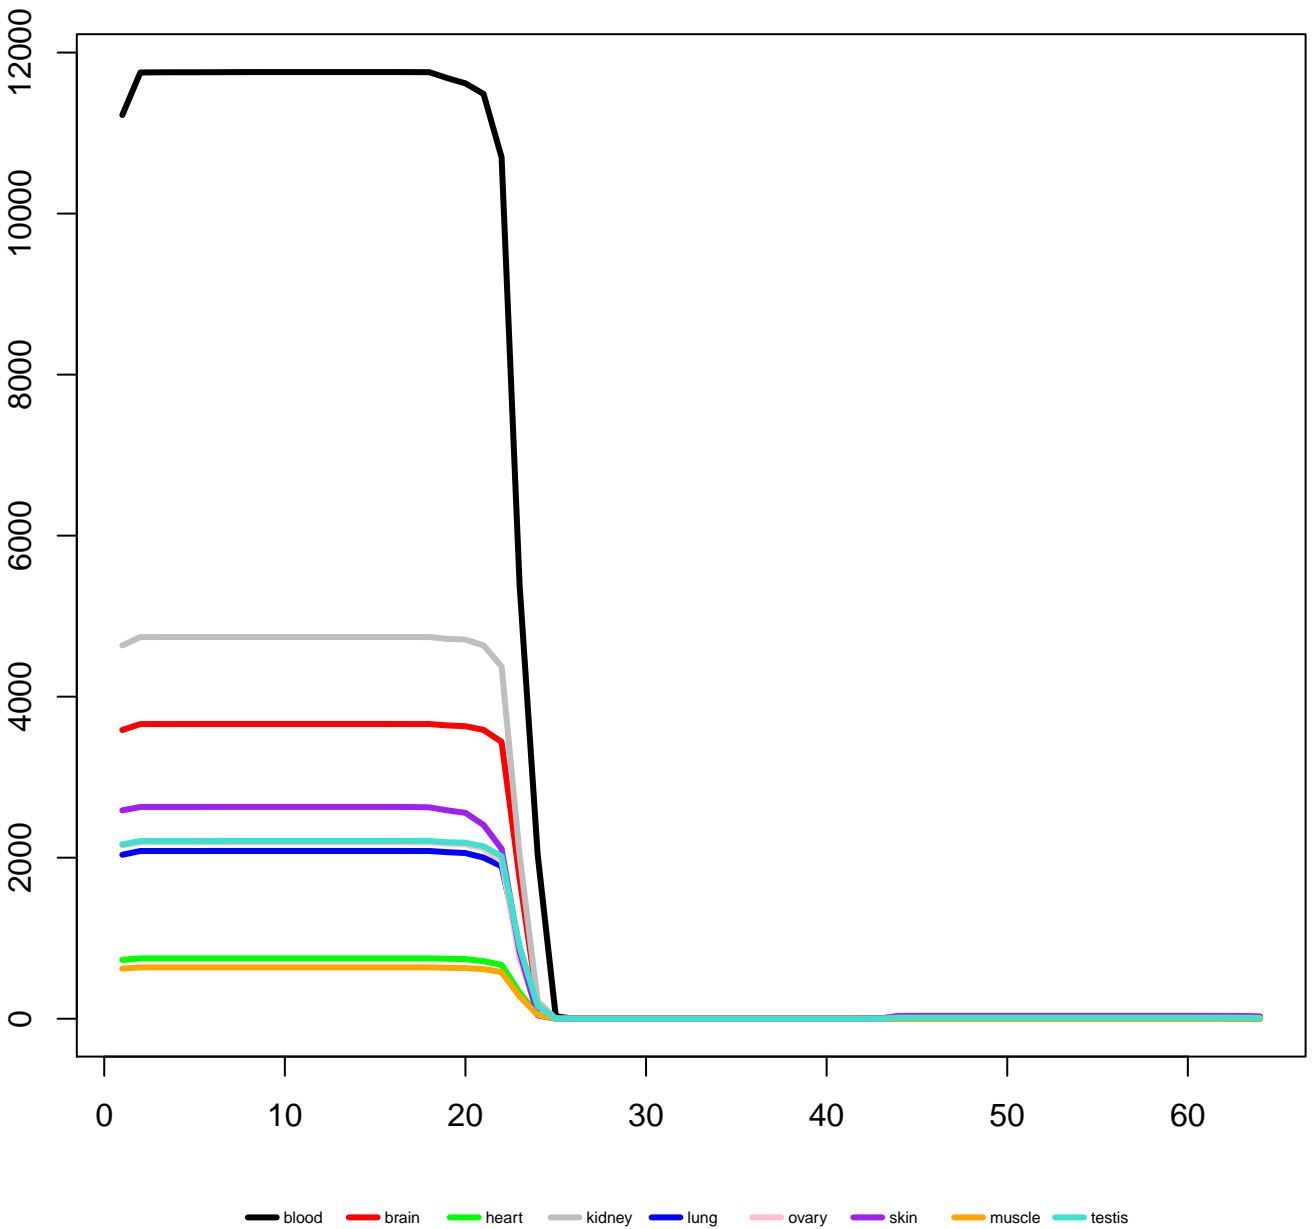

# 20\_40144613-40144675(+)\_cfa-mir-425\_high

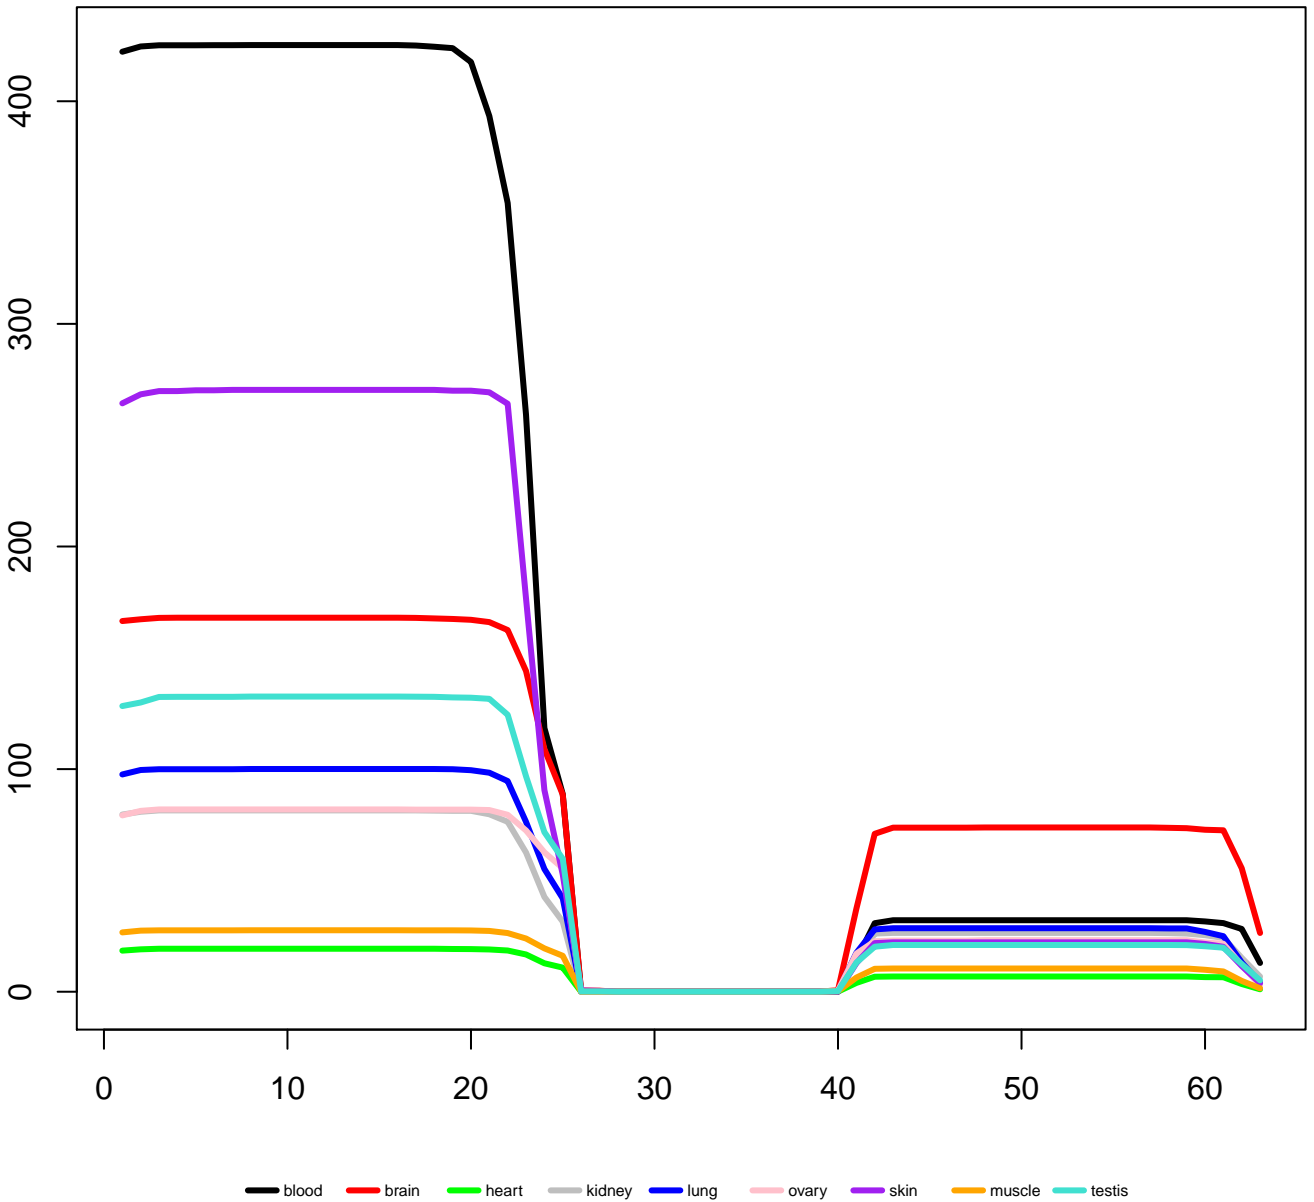

# 20\_40535521-40535595(+)\_mir-711\_low

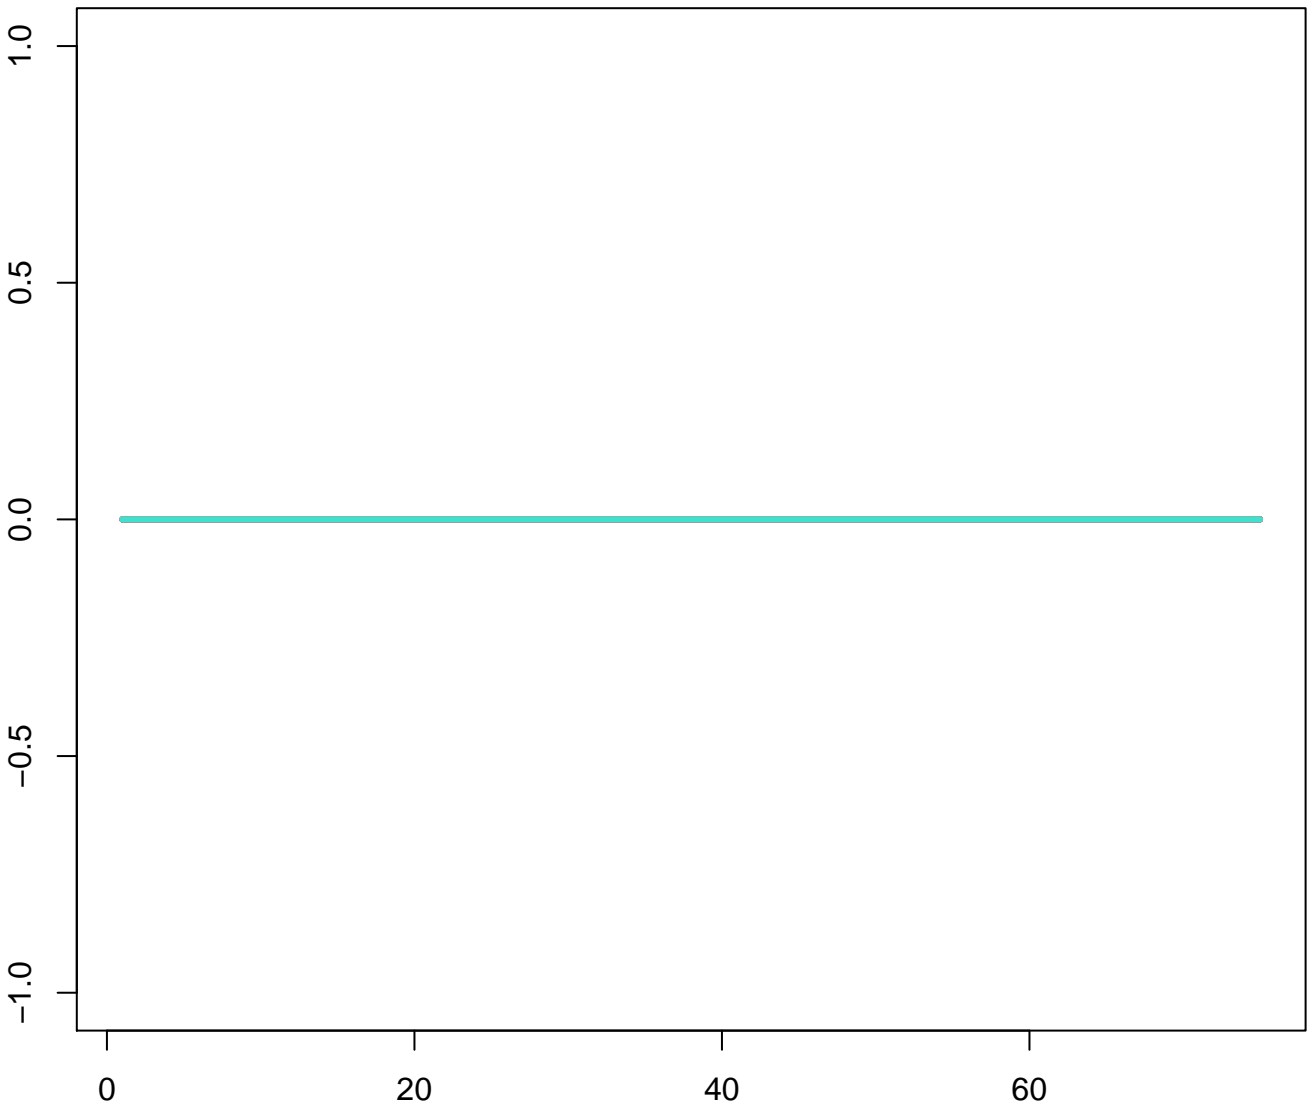

blood brain heart kidney lung ovary skin muscle testis

# 20\_43603630-43603744(+)\_cfa-mir-8801\_low

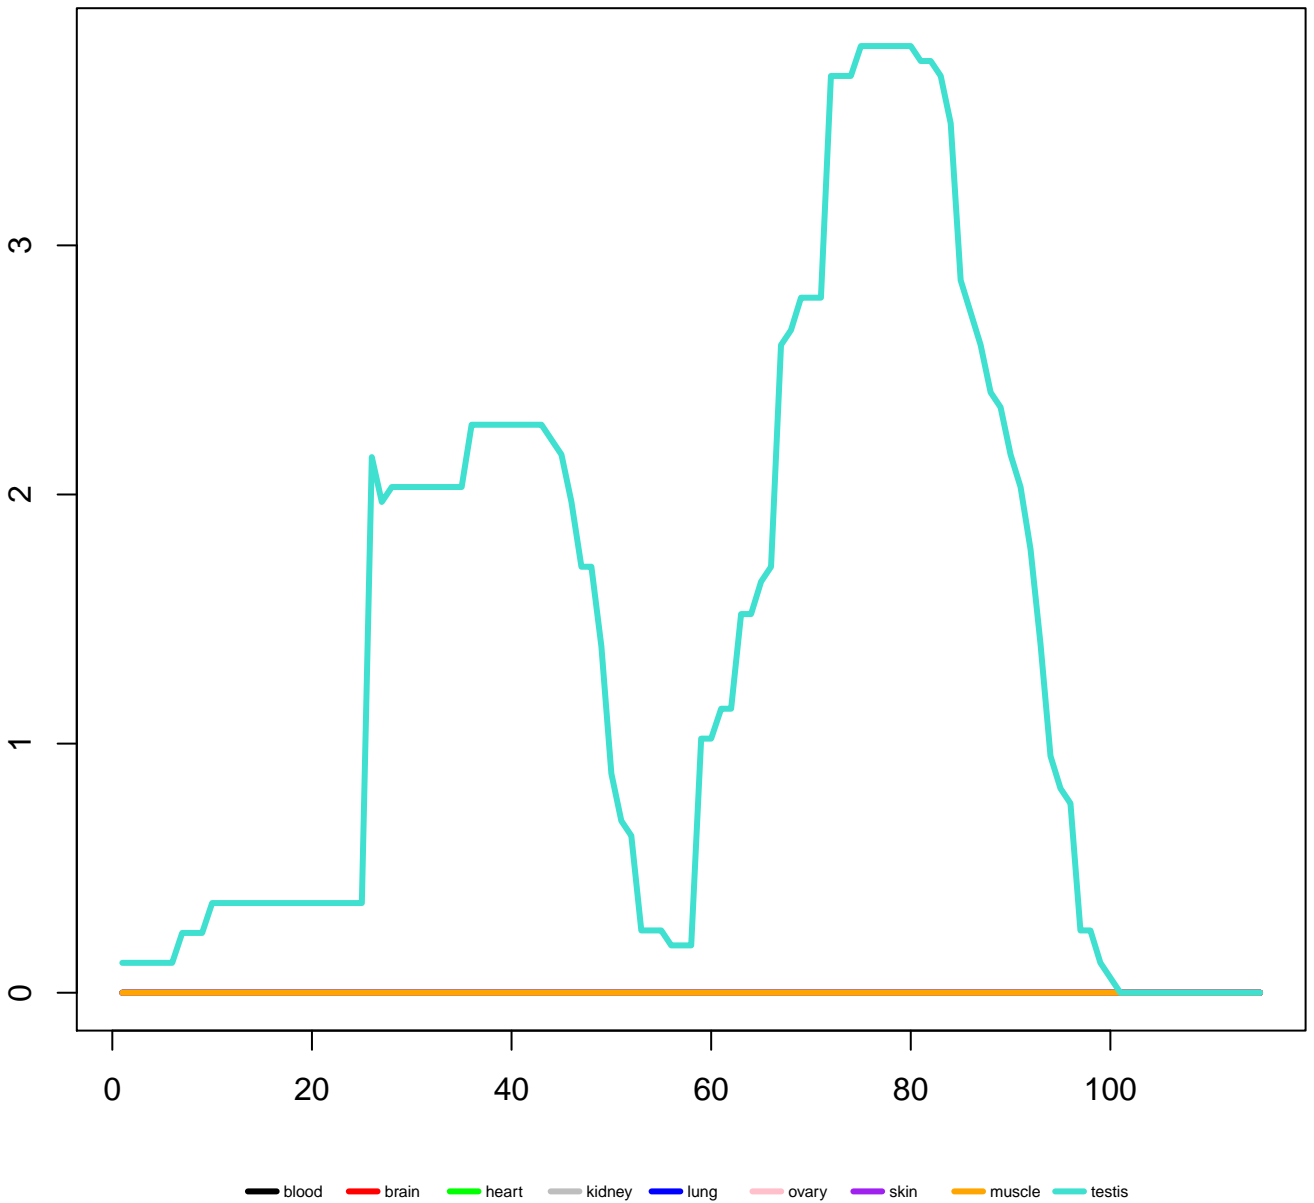



# 20\_48369940-48370084(-)\_mir-8994\_low



blood brain heart kidney lung ovary skin muscle testis



# 20\_48441016-48441134(-)\_cfa-mir-1199\_low

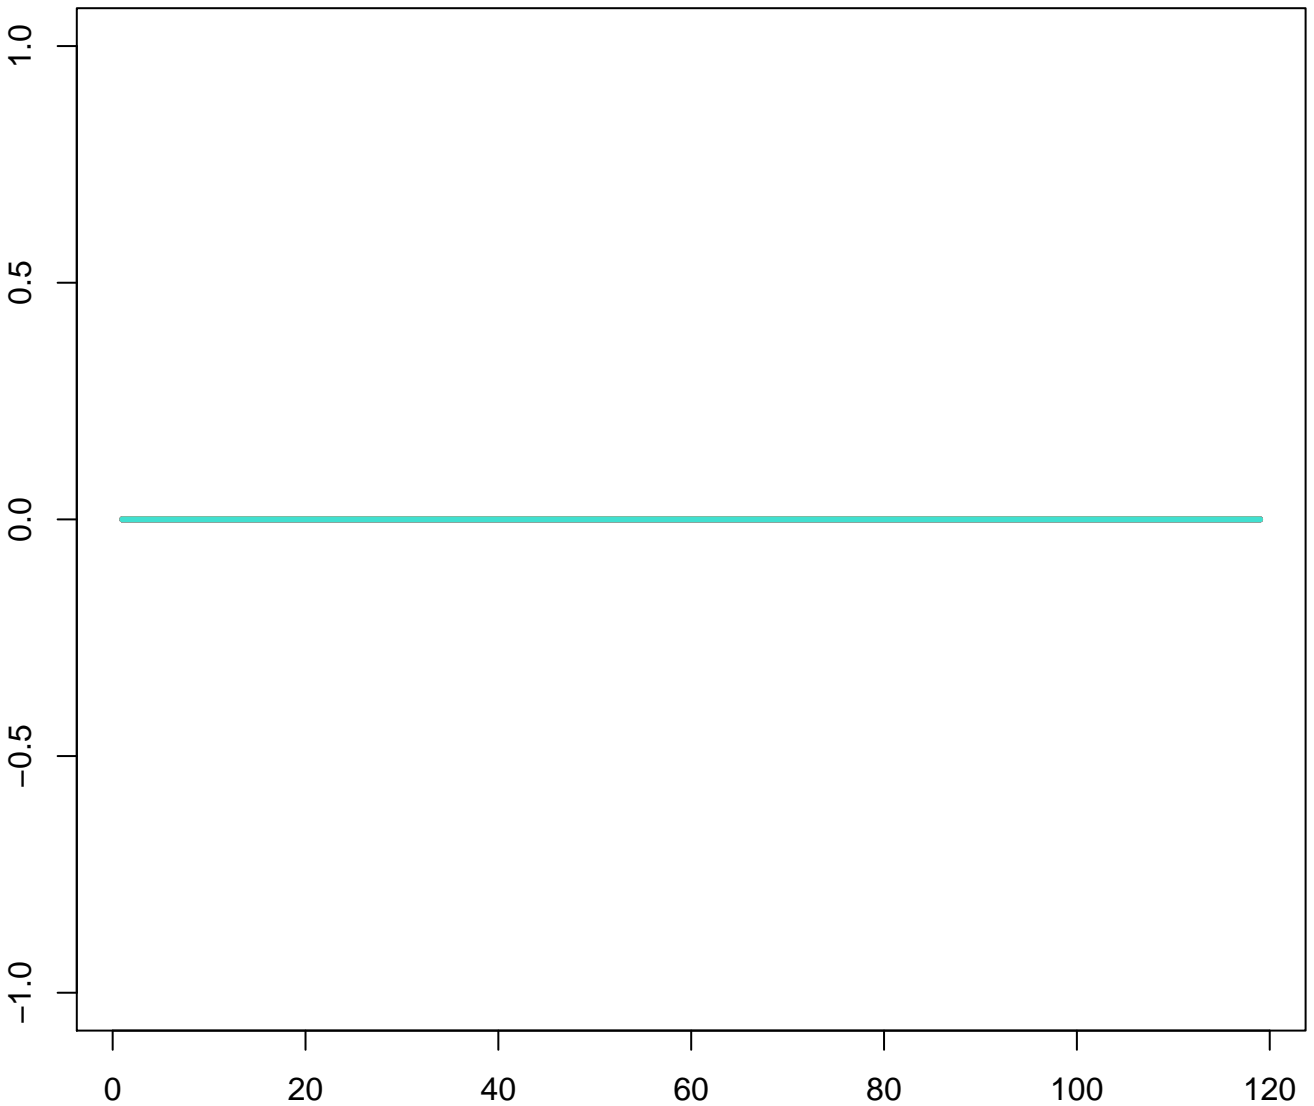

blood brain heart kidney lung ovary skin muscle testis

# 20\_48593158-48593221(-)\_cfa-mir-181d\_high

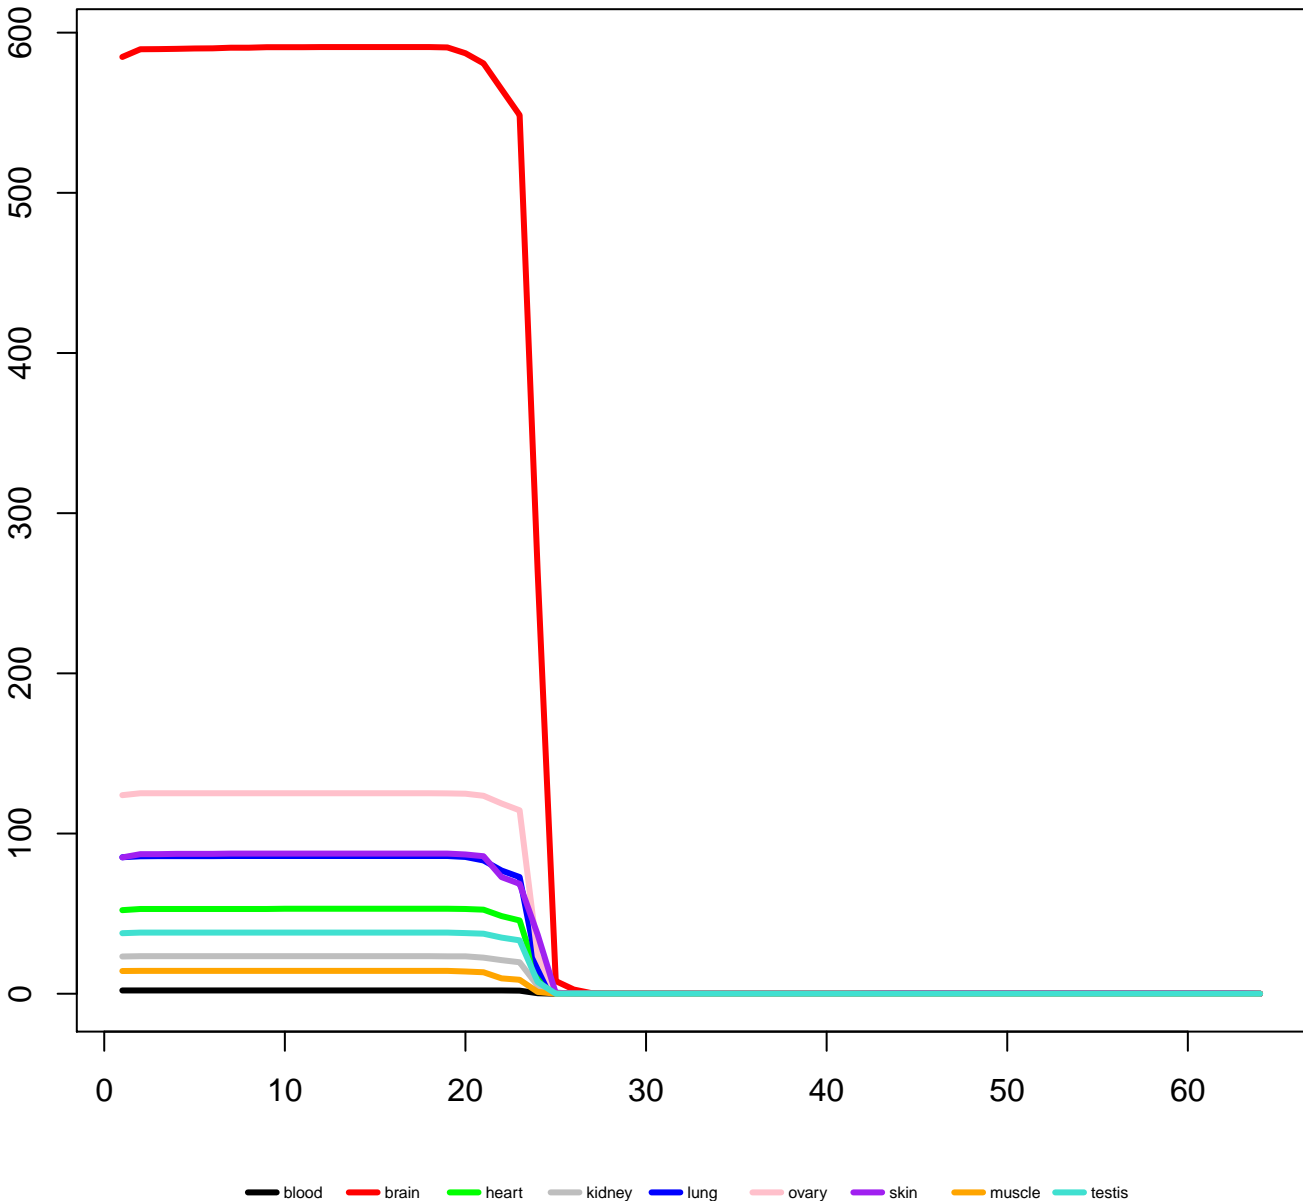

# 20\_48593343-48593403(-)\_cfa-mir-181c\_high

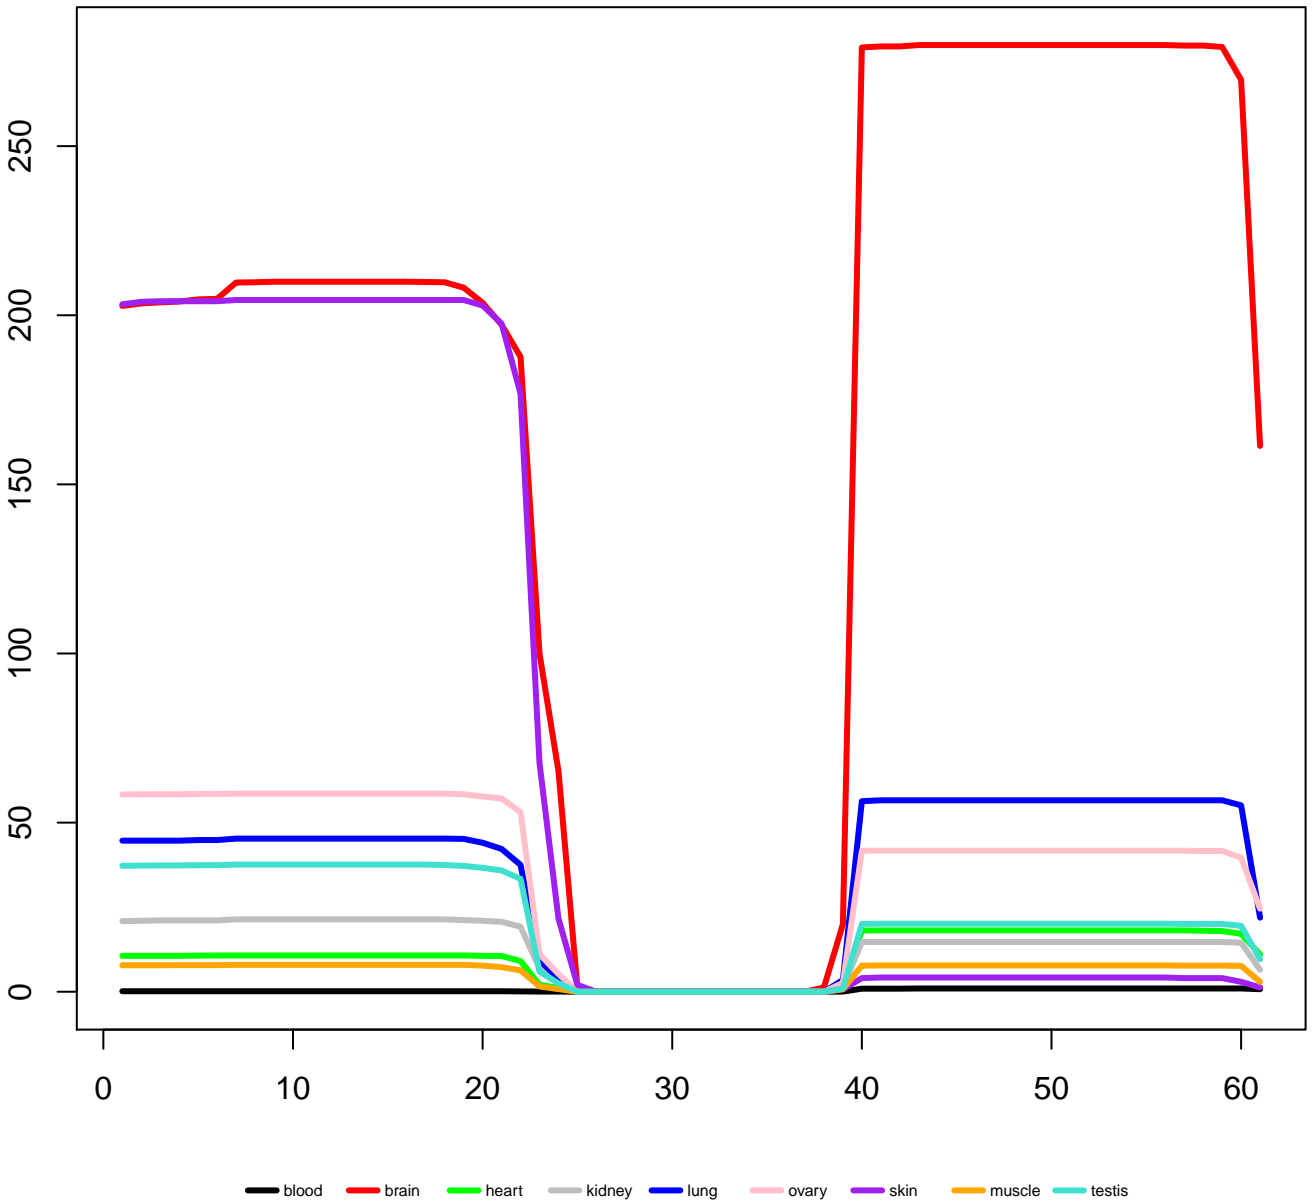



# 20\_48620556-48620615(+)\_cfa-mir-27a\_high

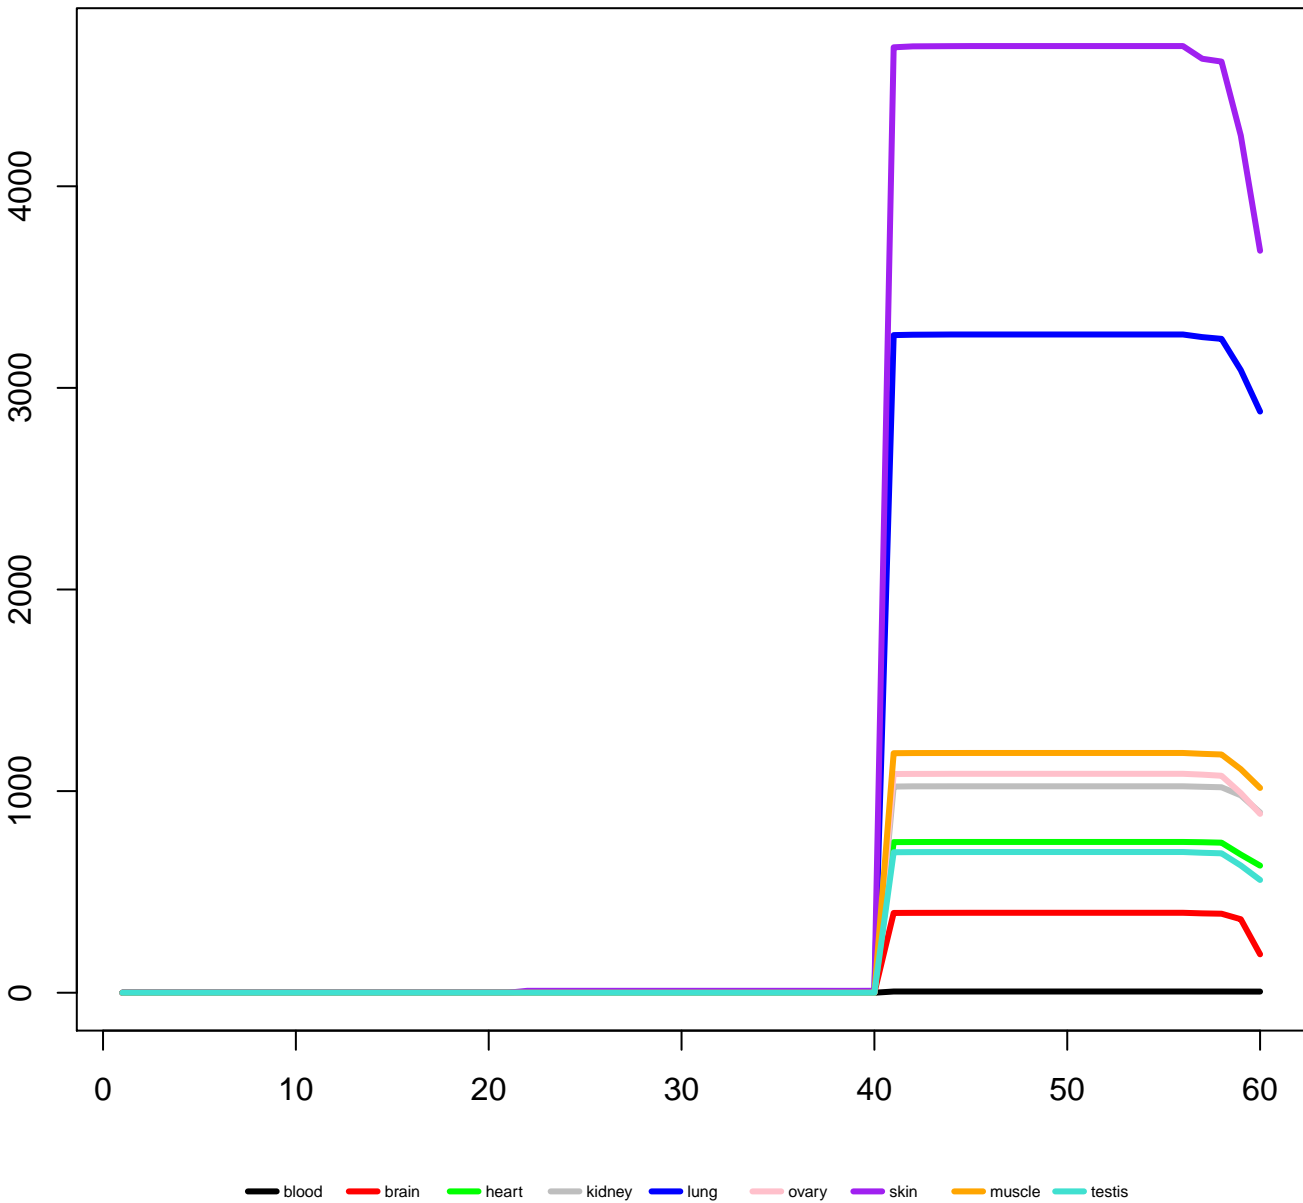

# 20\_48620671-48620755(-)\_mir-3074\_high

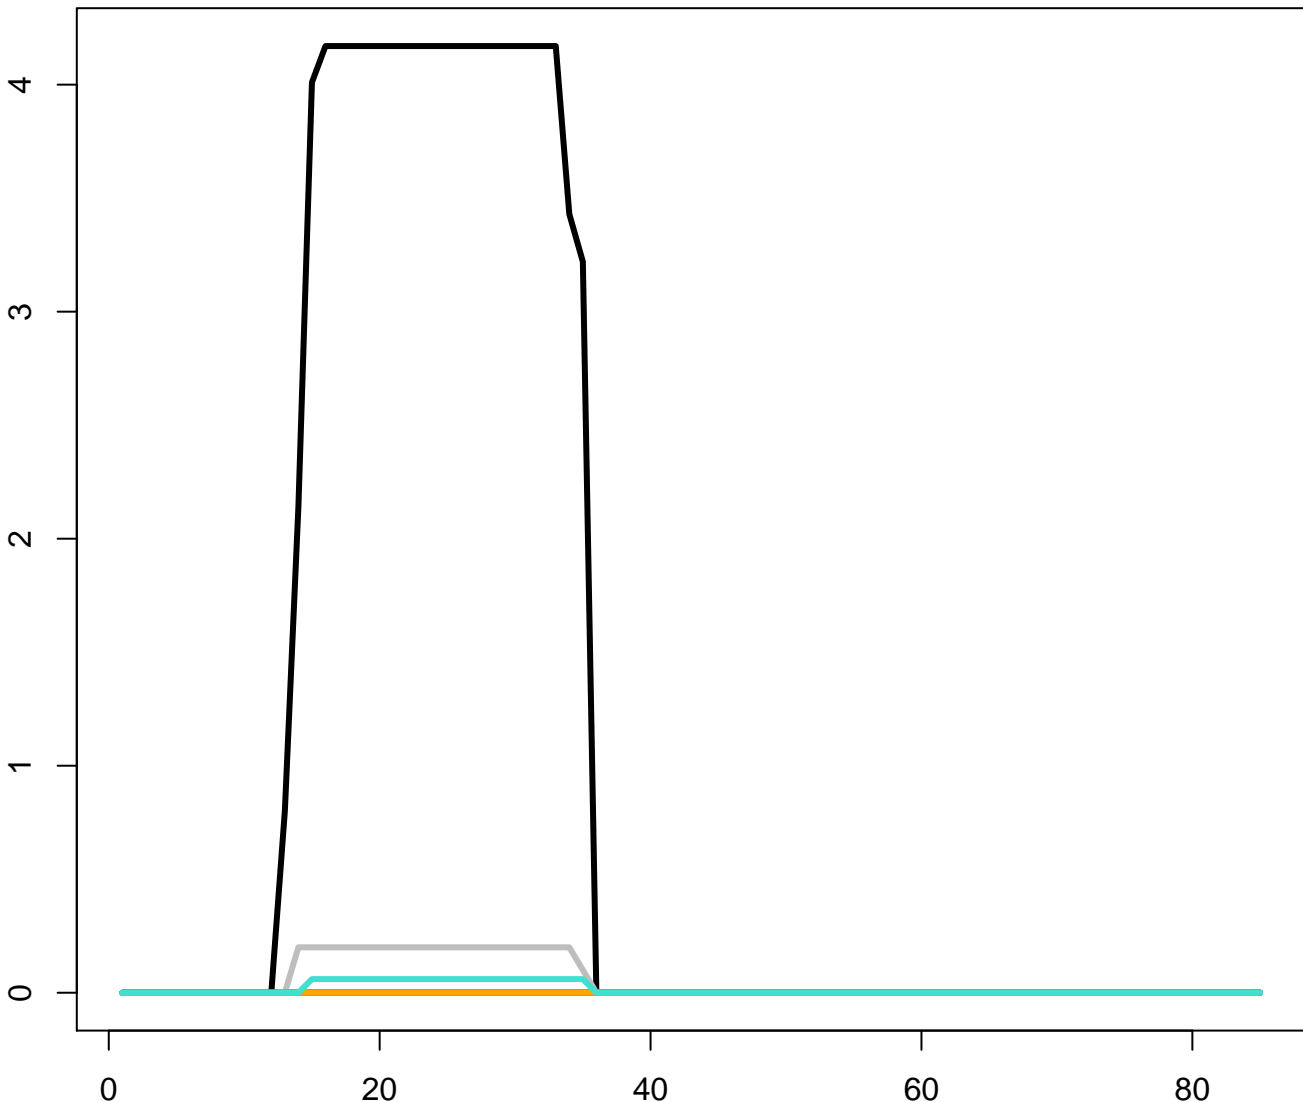

— blood — brain — heart — kidney — lung — ovary — skin — muscle — testis



# 20\_50410924-50410984(+)\_cfa-mir-199-1\_high

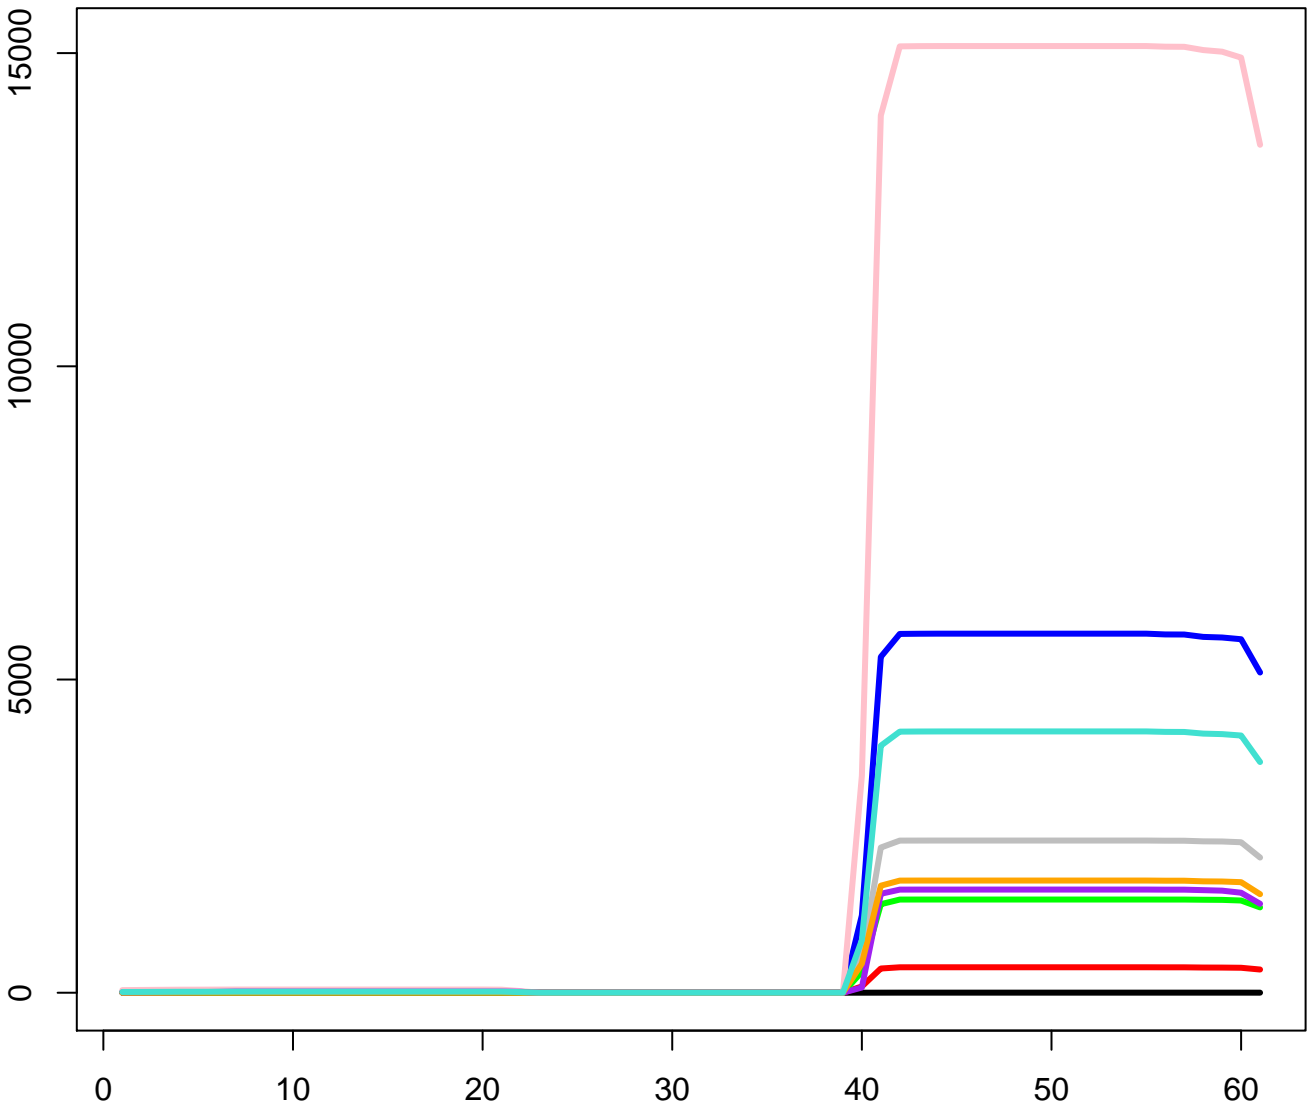

— blood — brain — heart — kidney — lung — ovary — skin — muscle — testis



# 20\_53555280-53555346(+)\_mir-6791\_low

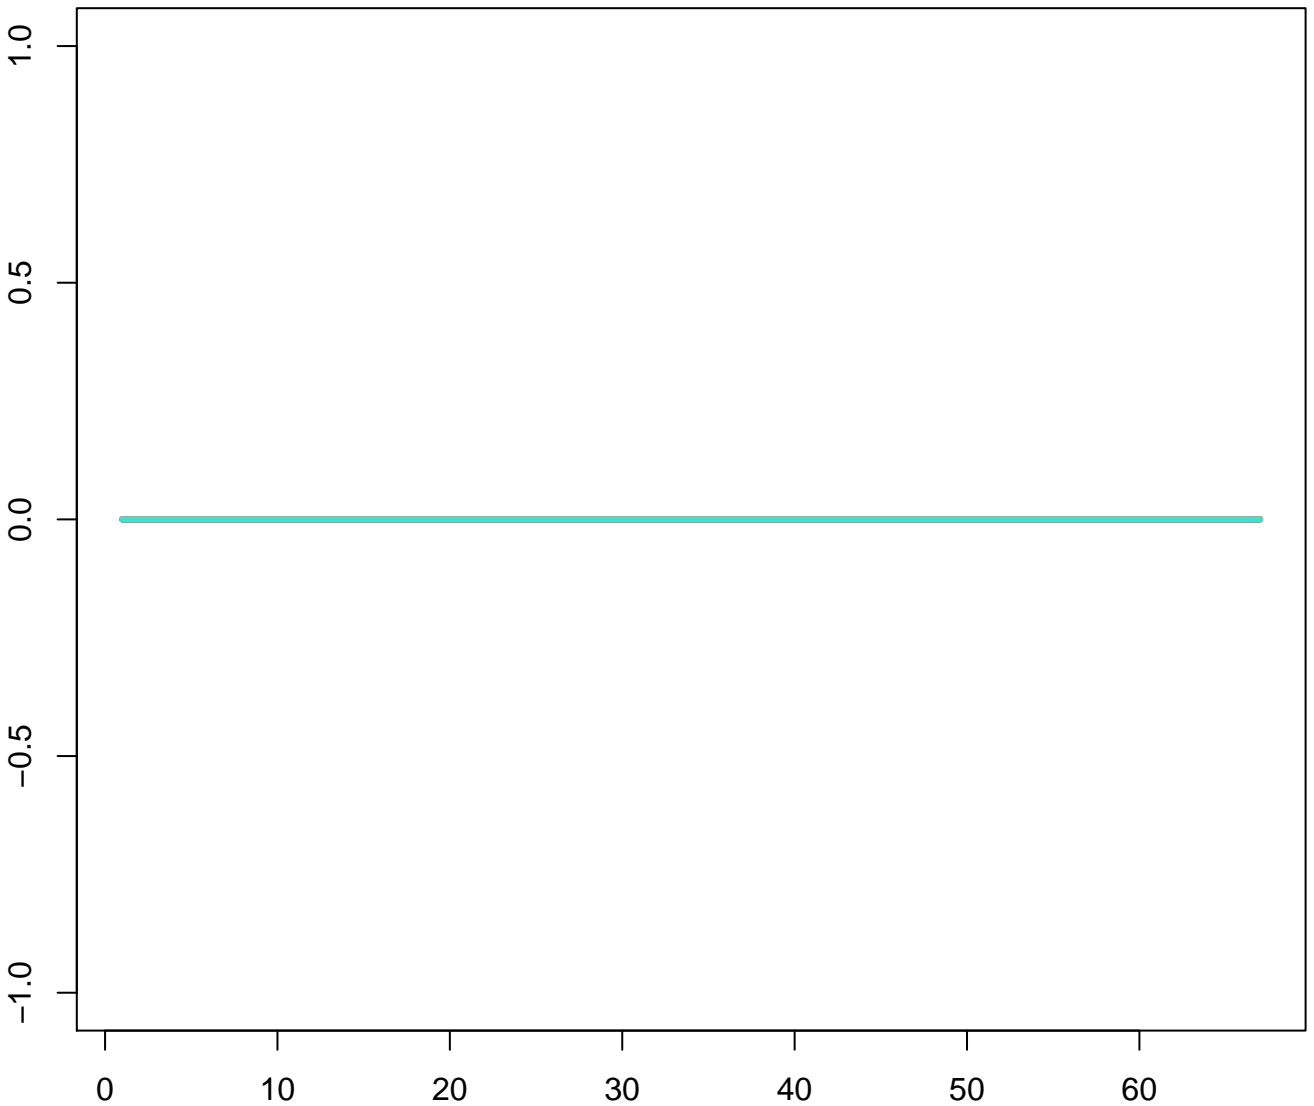

blood brain heart kidney lung ovary skin muscle testis

# 20\_54993200-54993287(-)\_cfa-mir-7-3\_high

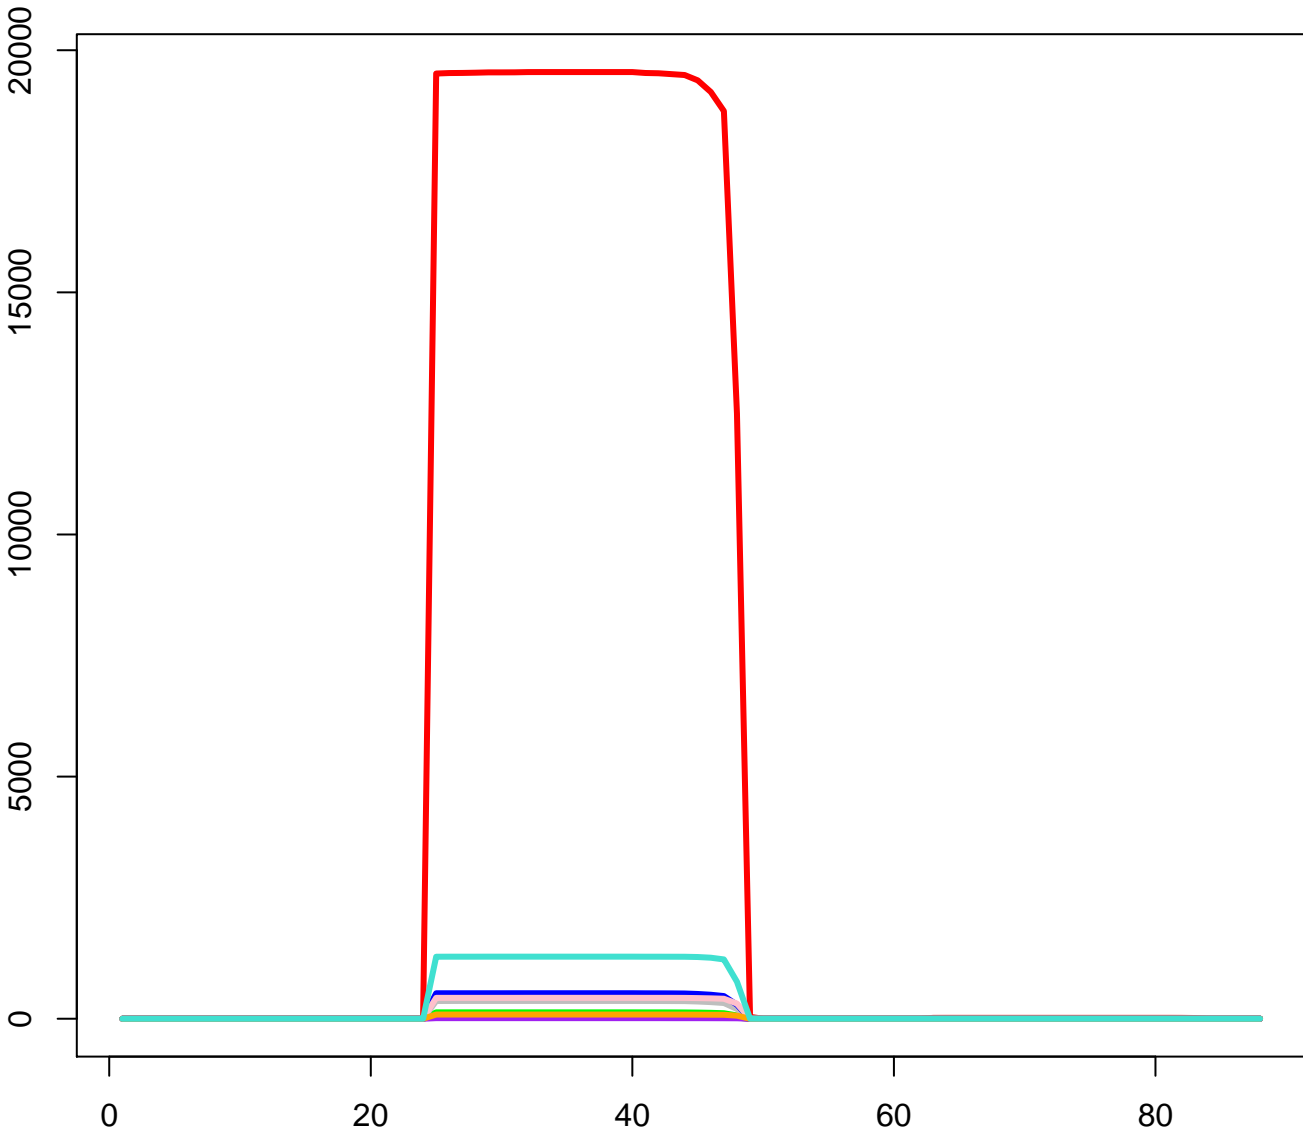

— blood — brain — heart — kidney — lung — ovary — skin — muscle — testis

# 20\_55100020-55100132(+)\_cfa-mir-8804\_low

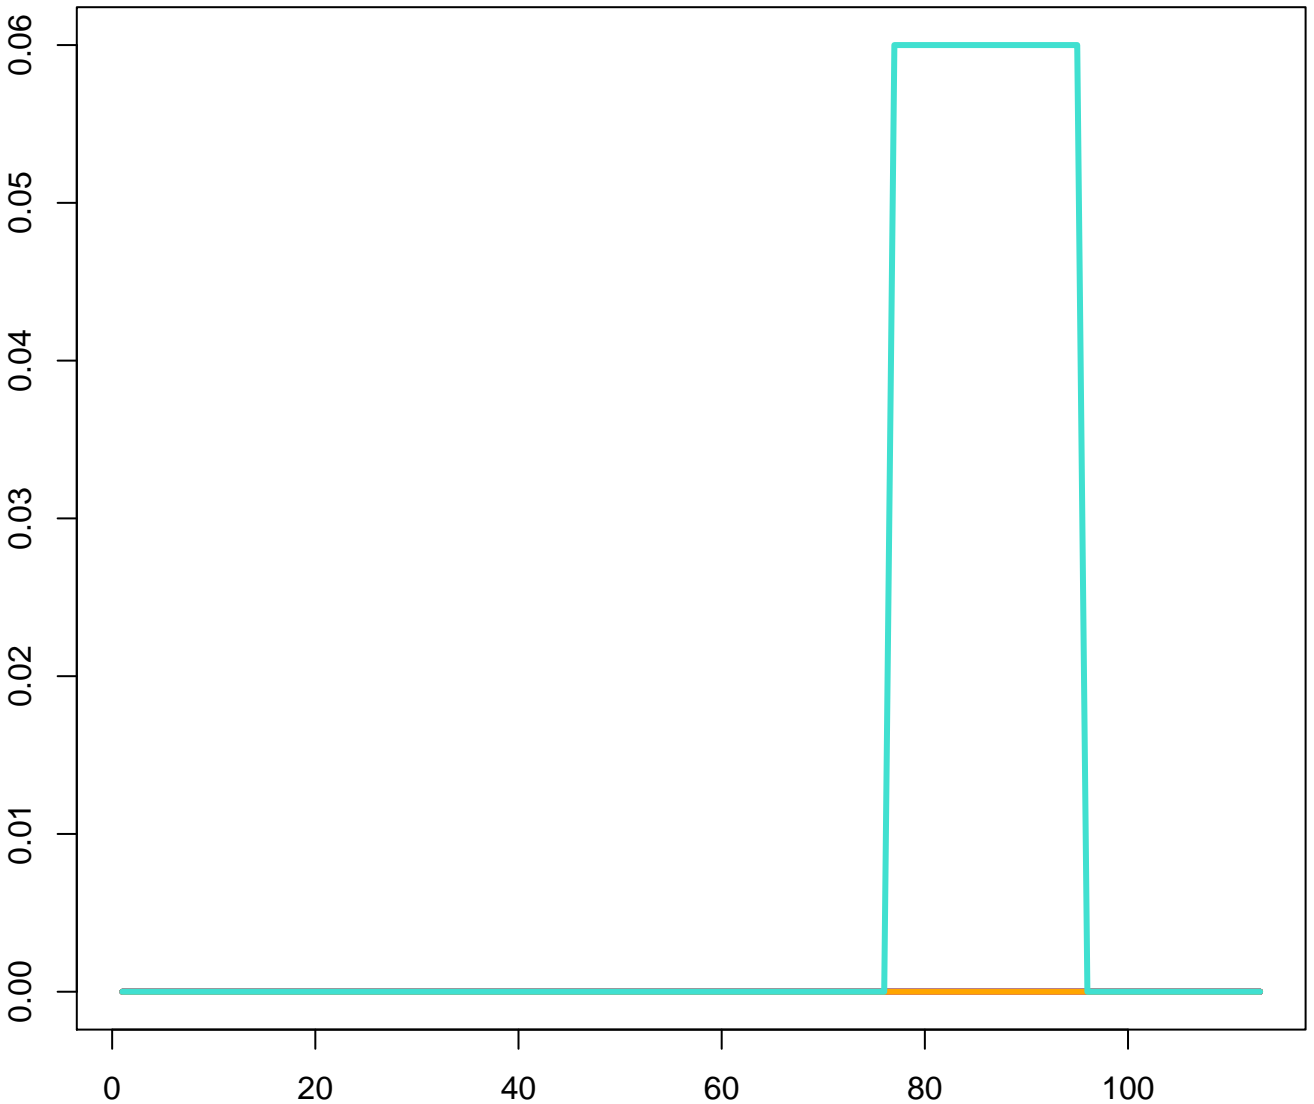

blood brain heart kidney lung ovary skin muscle testis

# 20\_55613223-55613363(+)\_cfa-mir-8802\_low

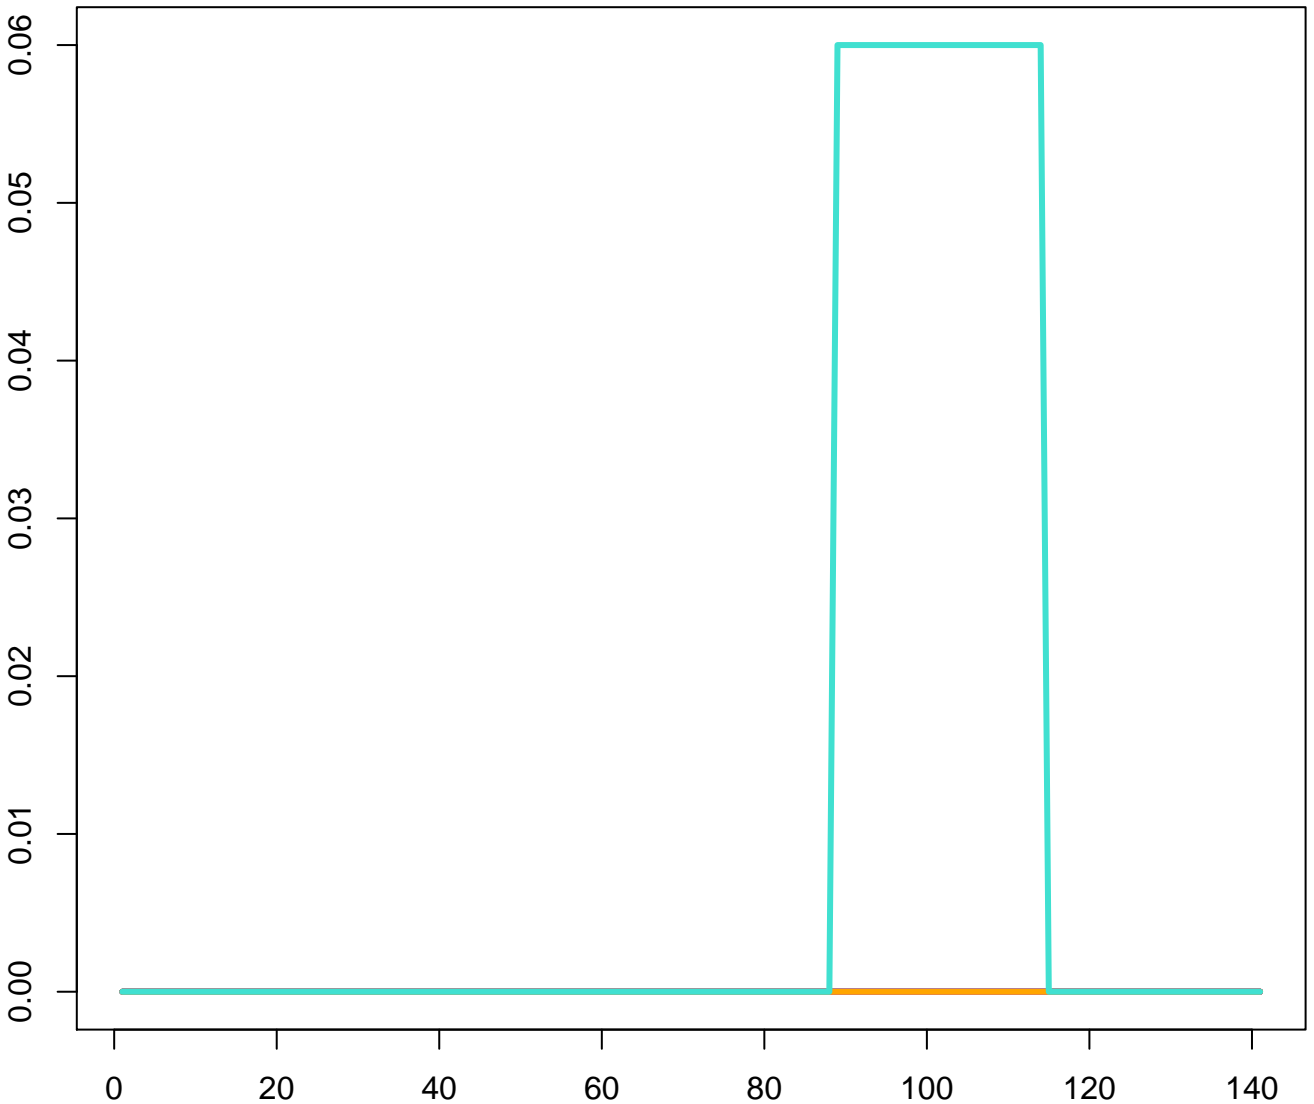

blood brain heart kidney lung ovary skin muscle testis

# 20\_57321911-57321997(-)\_mir-1905\_low

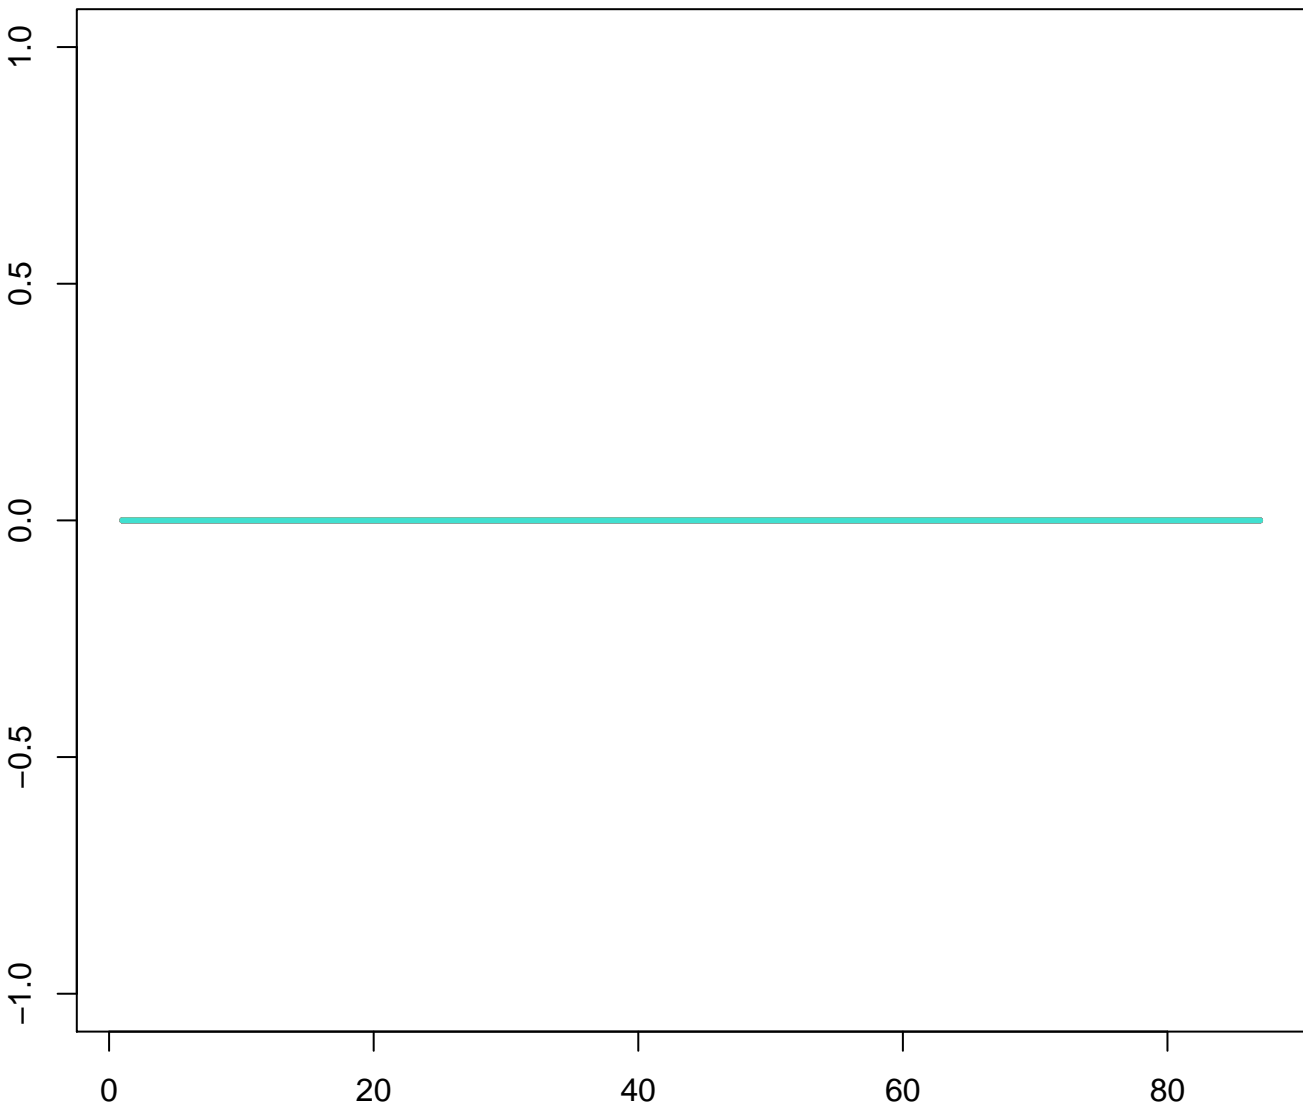

blood brain heart kidney lung ovary skin muscle testis

# 20\_57346963-57347107(-)\_cfa-mir-8805\_low



— blood — brain — heart — kidney — lung — ovary — skin — muscle — testis

# 21\_4824763-4824867(-)\_mir-1260b\_low

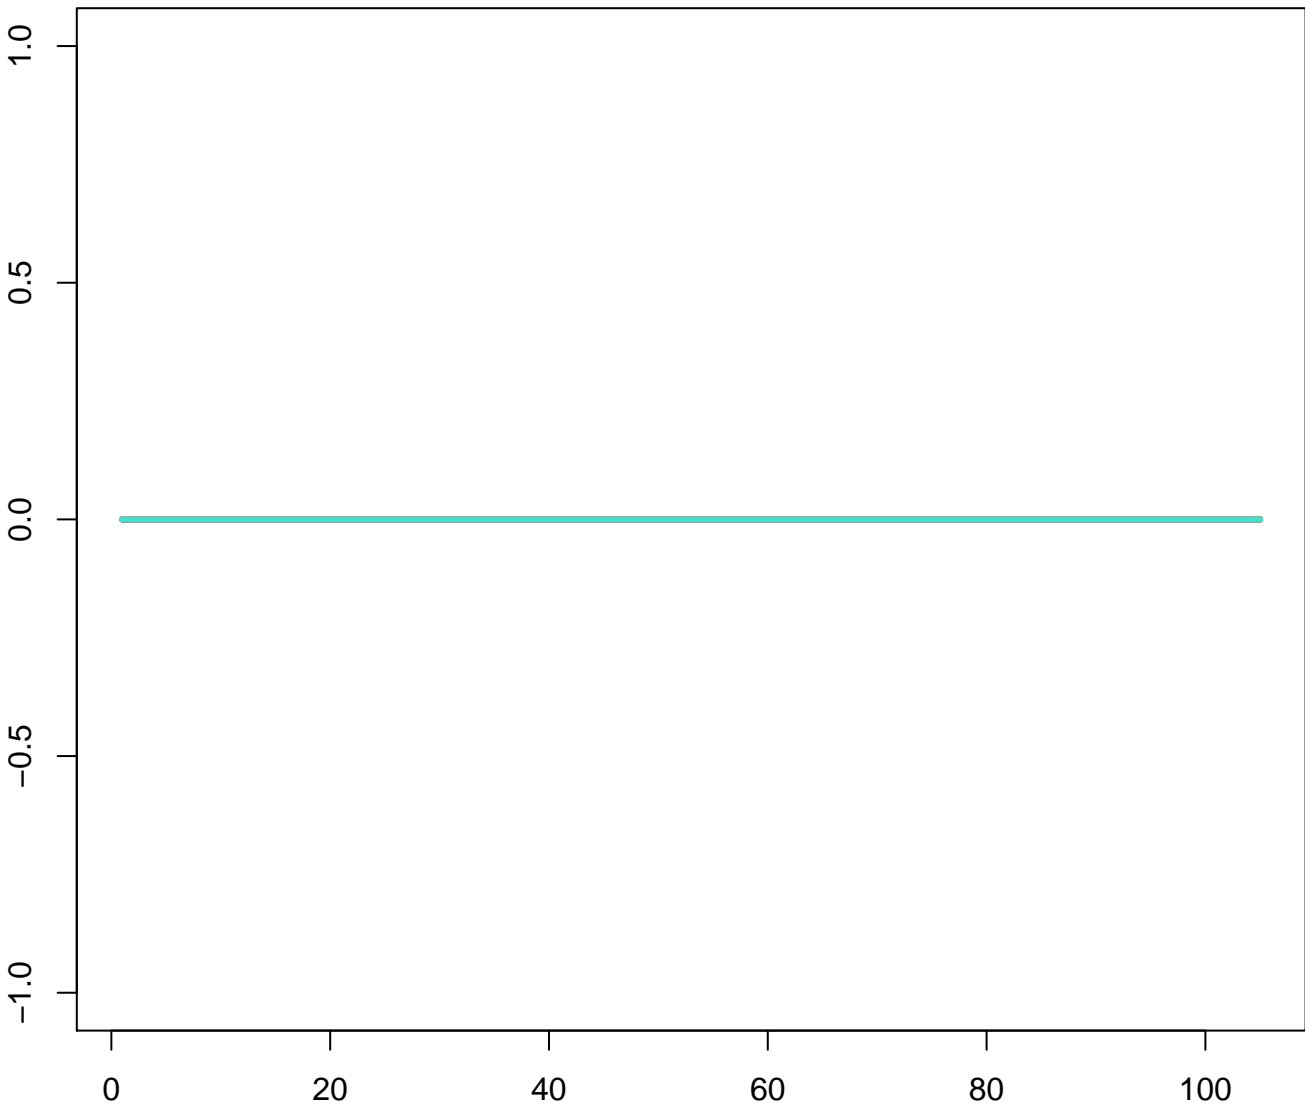

blood brain heart kidney lung ovary skin muscle testis

# 21\_6284255-6284381(-)\_cfa-mir-8812\_low

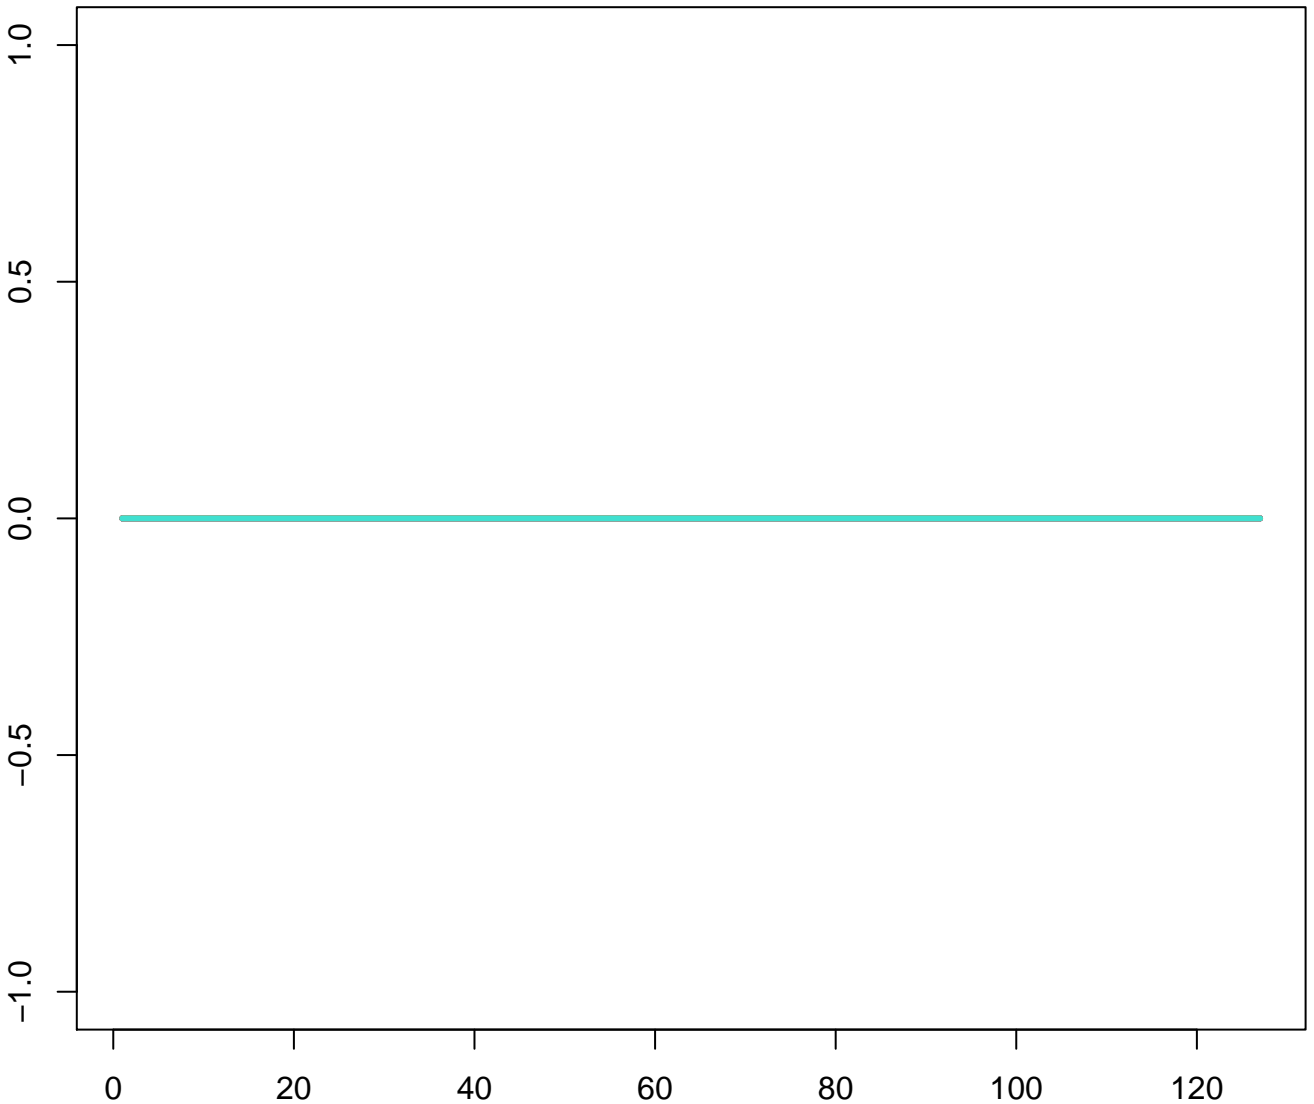

blood brain heart kidney lung ovary skin muscle testis





# 21\_20592019-20592076(+)\_cfa-mir-1838\_high

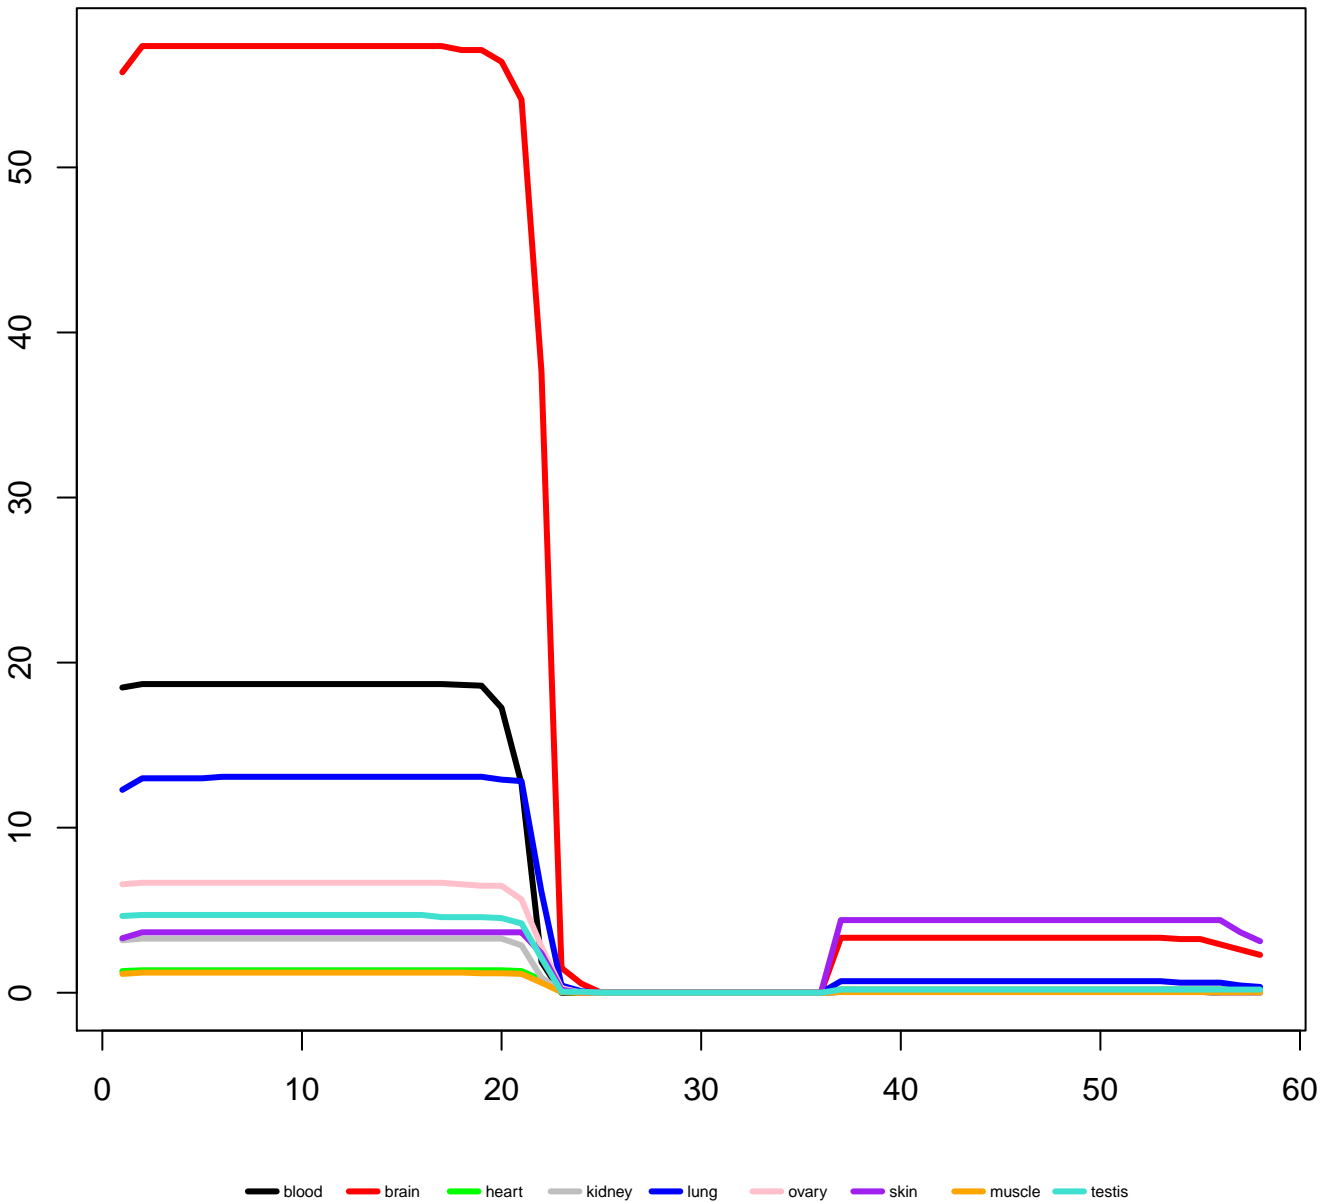



# 21\_25597025-25597081(+)\_cfa-mir-139\_high

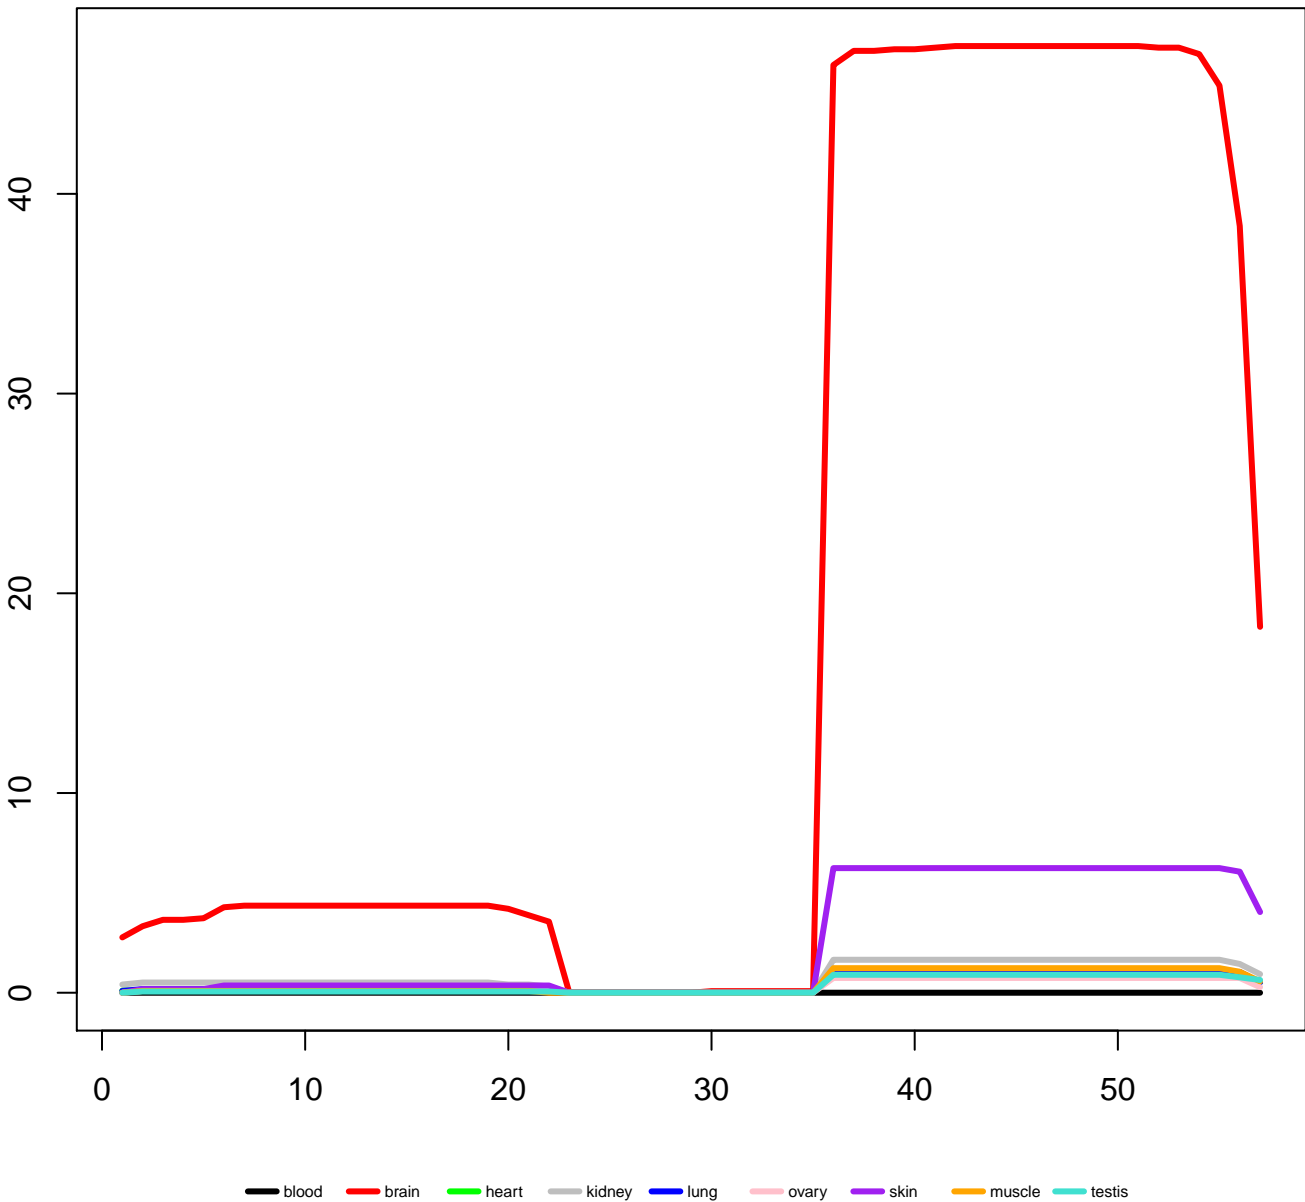



# 21\_33645436-33645544(+)\_cfa-mir-8810\_low



blood brain heart kidney lung ovary skin muscle testis

# 21\_50309884-50309992(-)\_cfa-mir-8811\_low



blood brain heart kidney lung ovary skin muscle testis

# 21\_50751931-50752075(+)\_cfa-mir-8813-1\_low

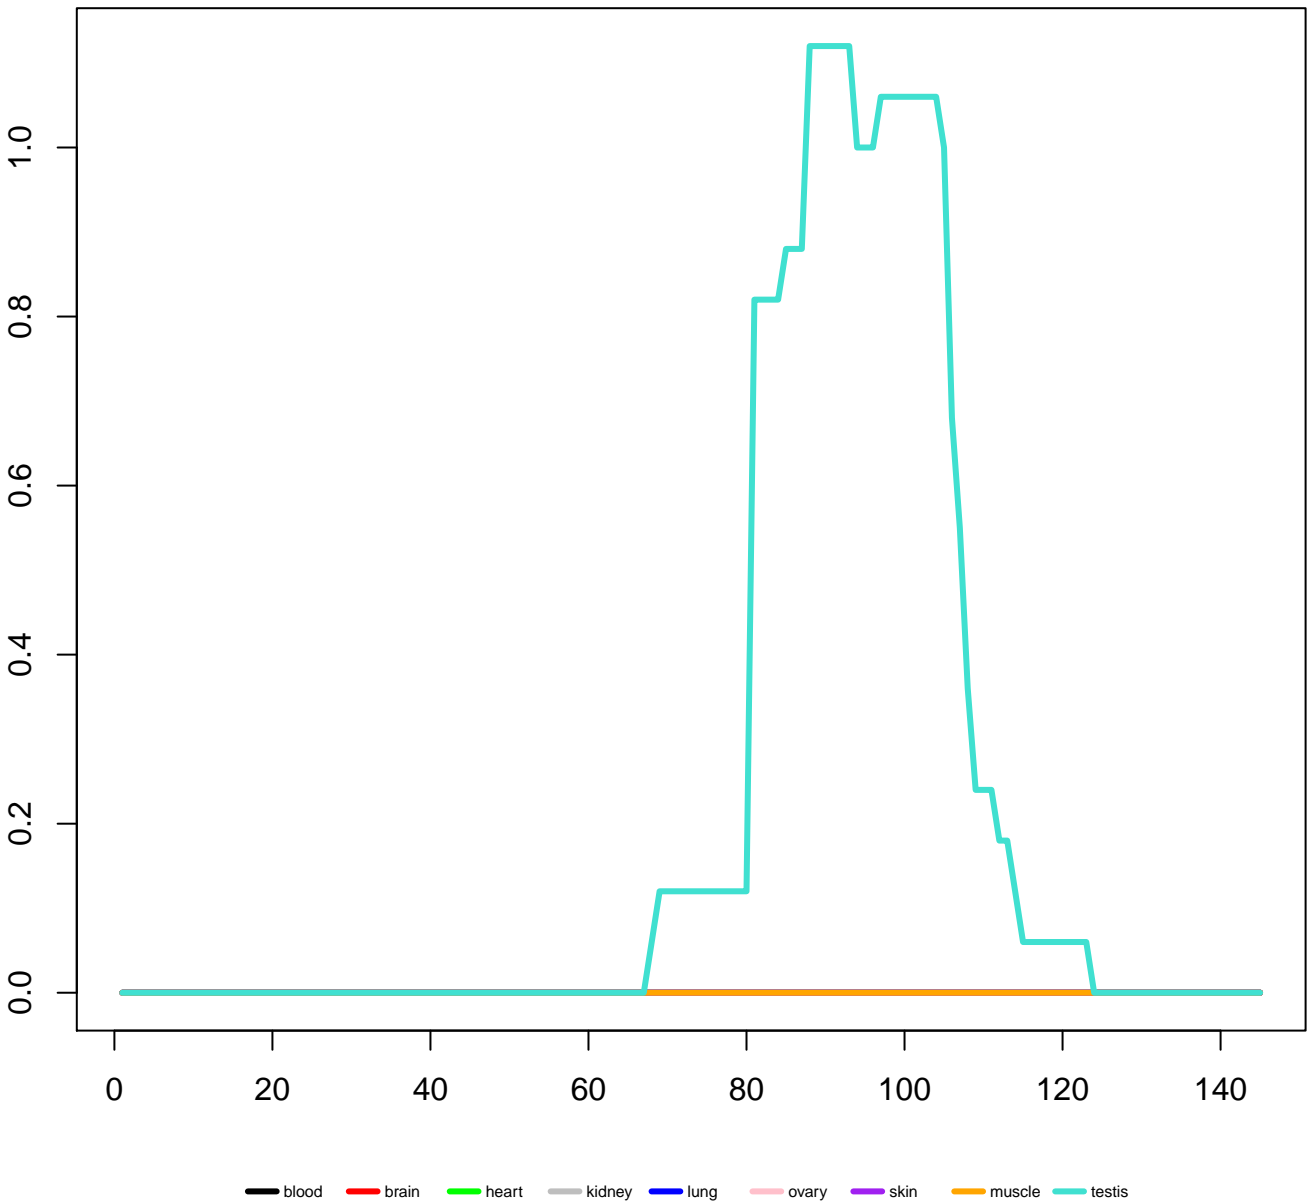



# 22\_1846880-1846938(+)\_cfa-mir-15a\_high

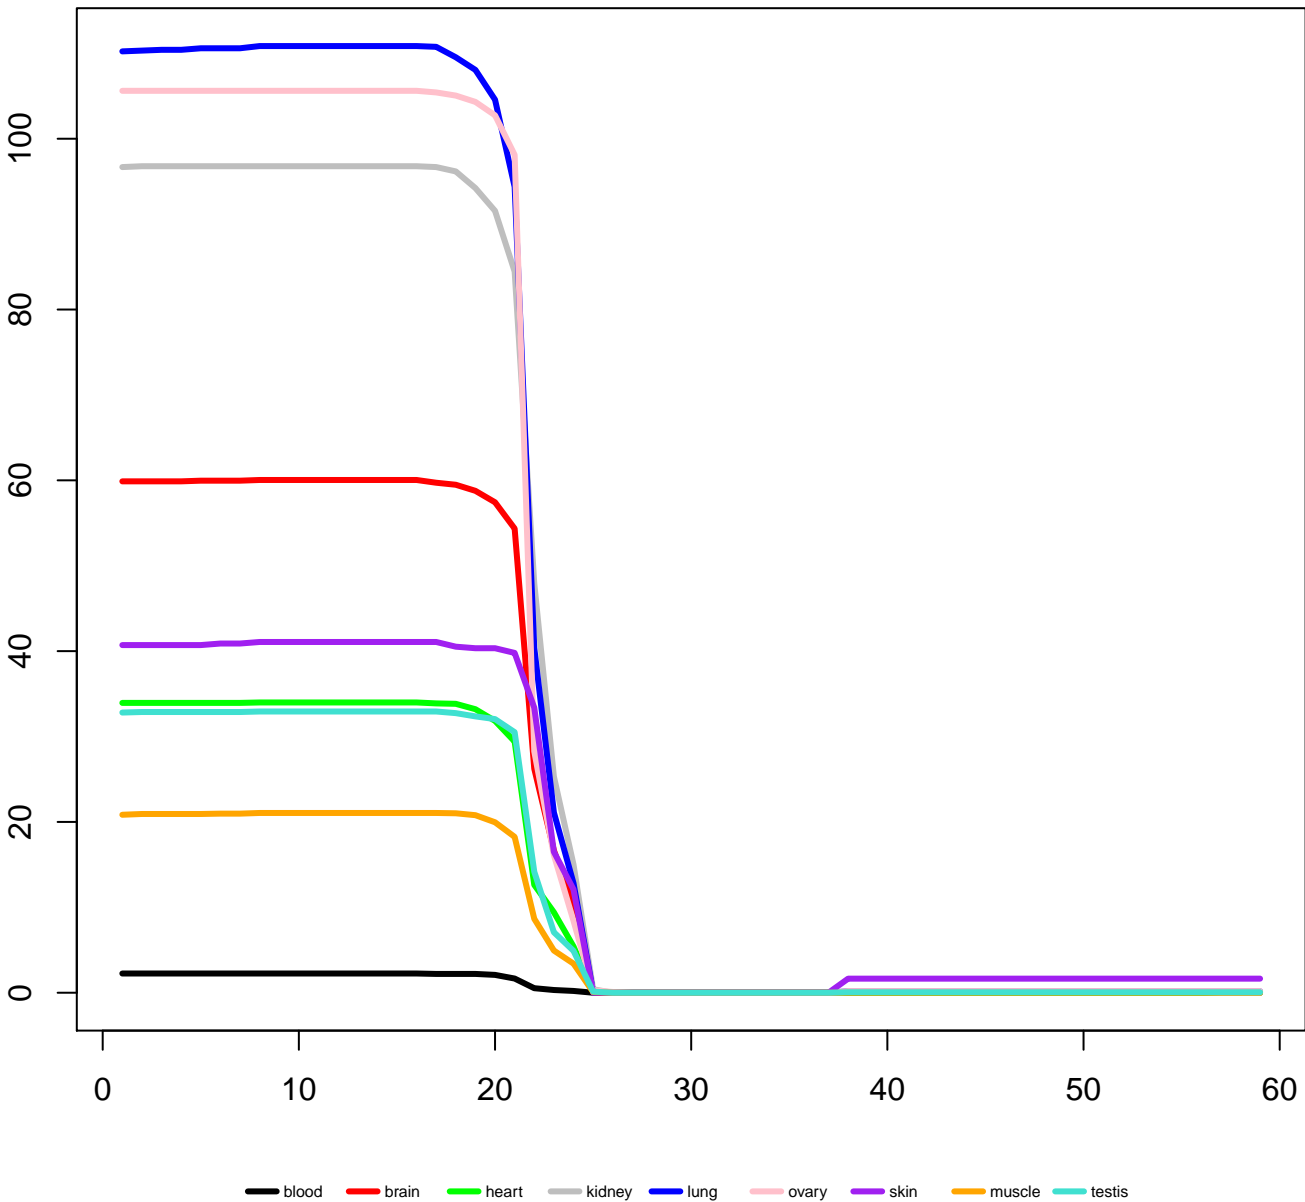

# 22\_1847020-1847084(+)\_cfa-mir-16-1\_high

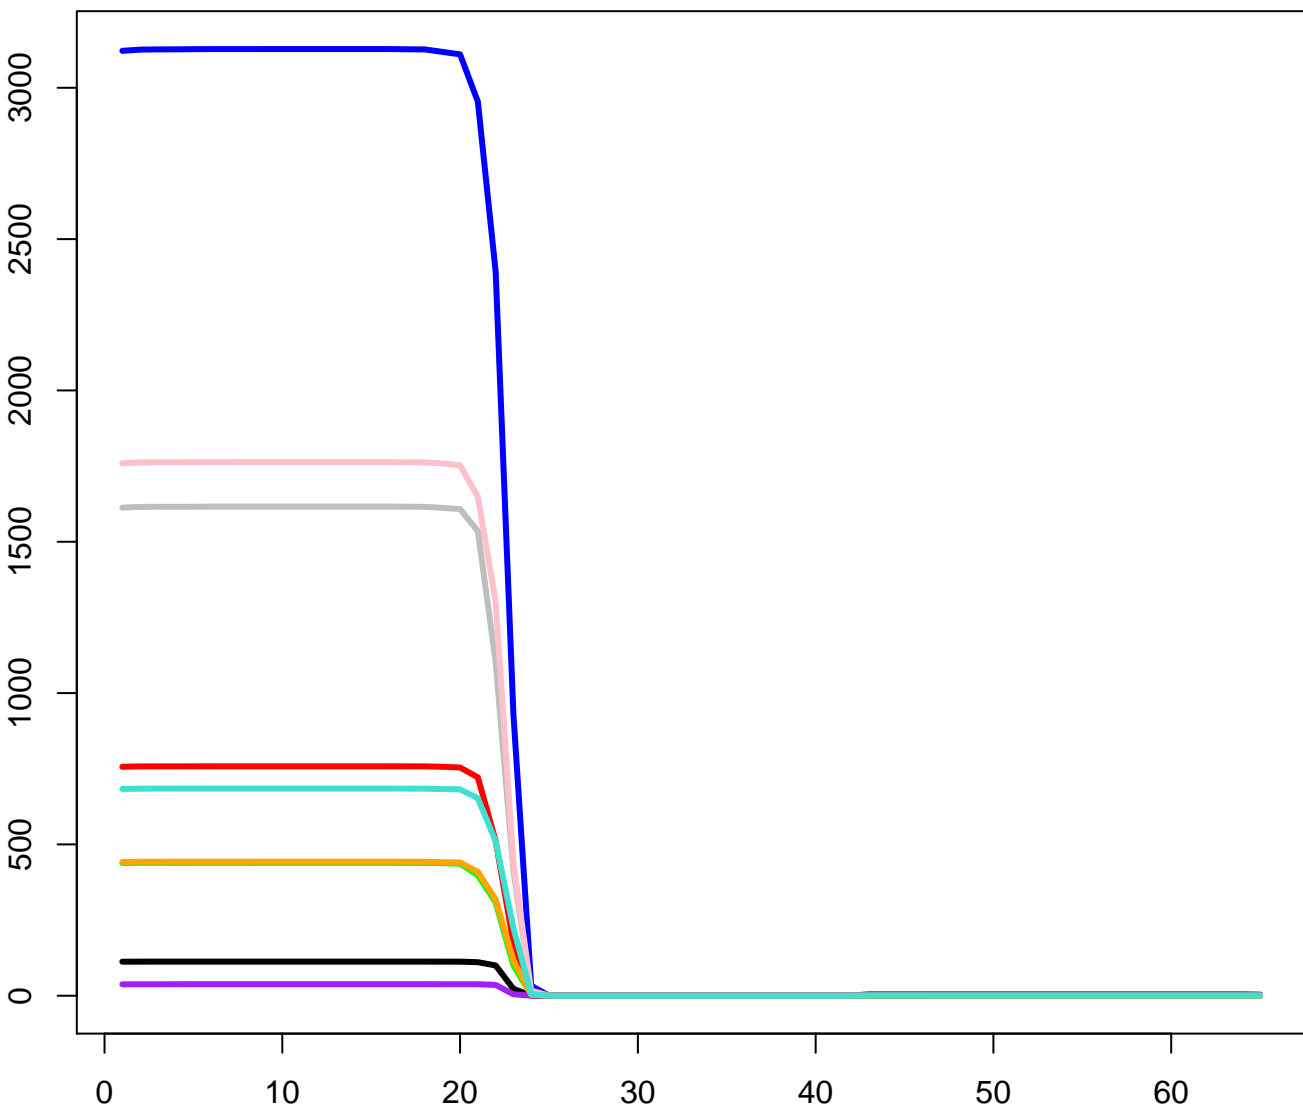

— blood — brain — heart — kidney — lung — ovary — skin — muscle — testis

# 22\_6109249-6109373(+)\_cfa-mir-8814\_low

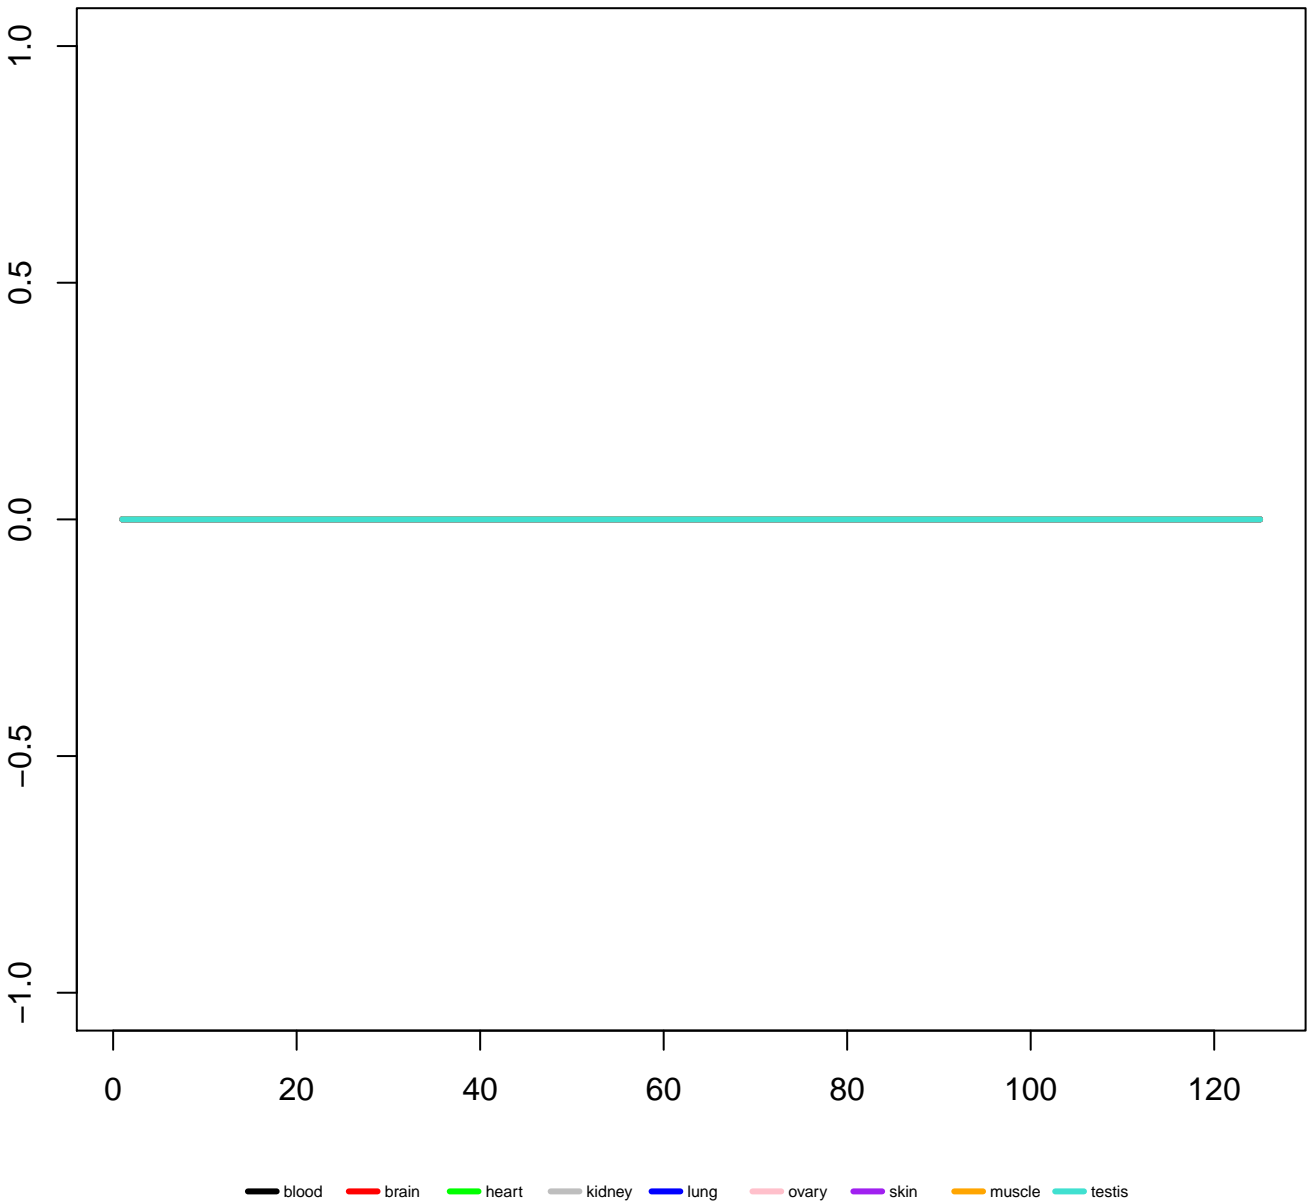

# 22\_9147830-9147922(+)\_mir-5006\_low

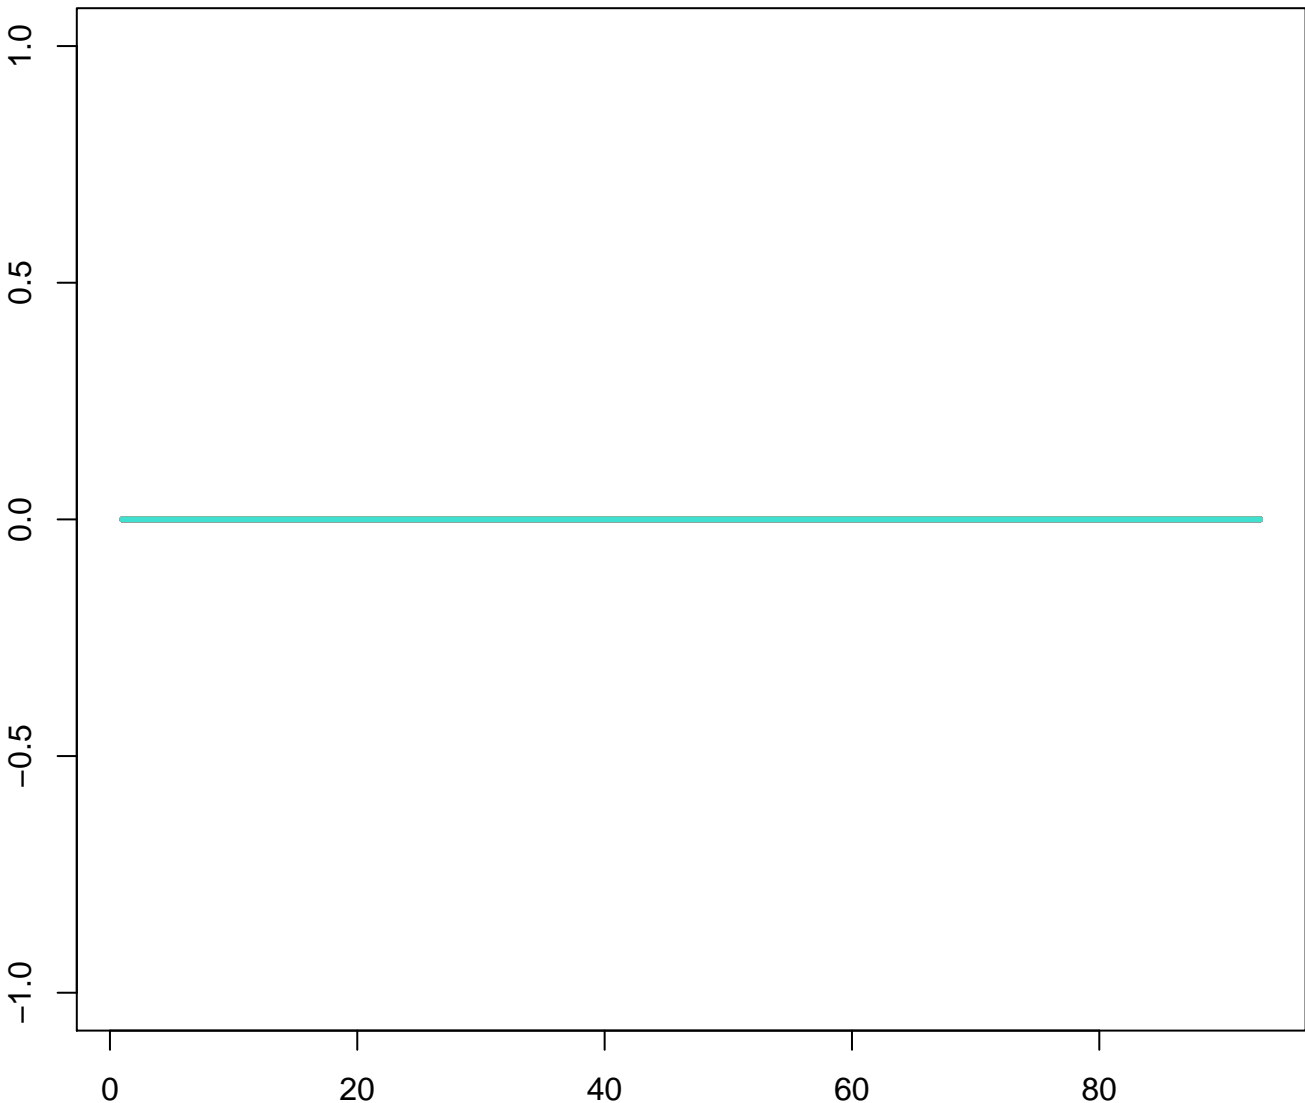

blood brain heart kidney lung ovary skin muscle testis

# 22\_9834874-9834969(+)\_cfa-mir-759\_low

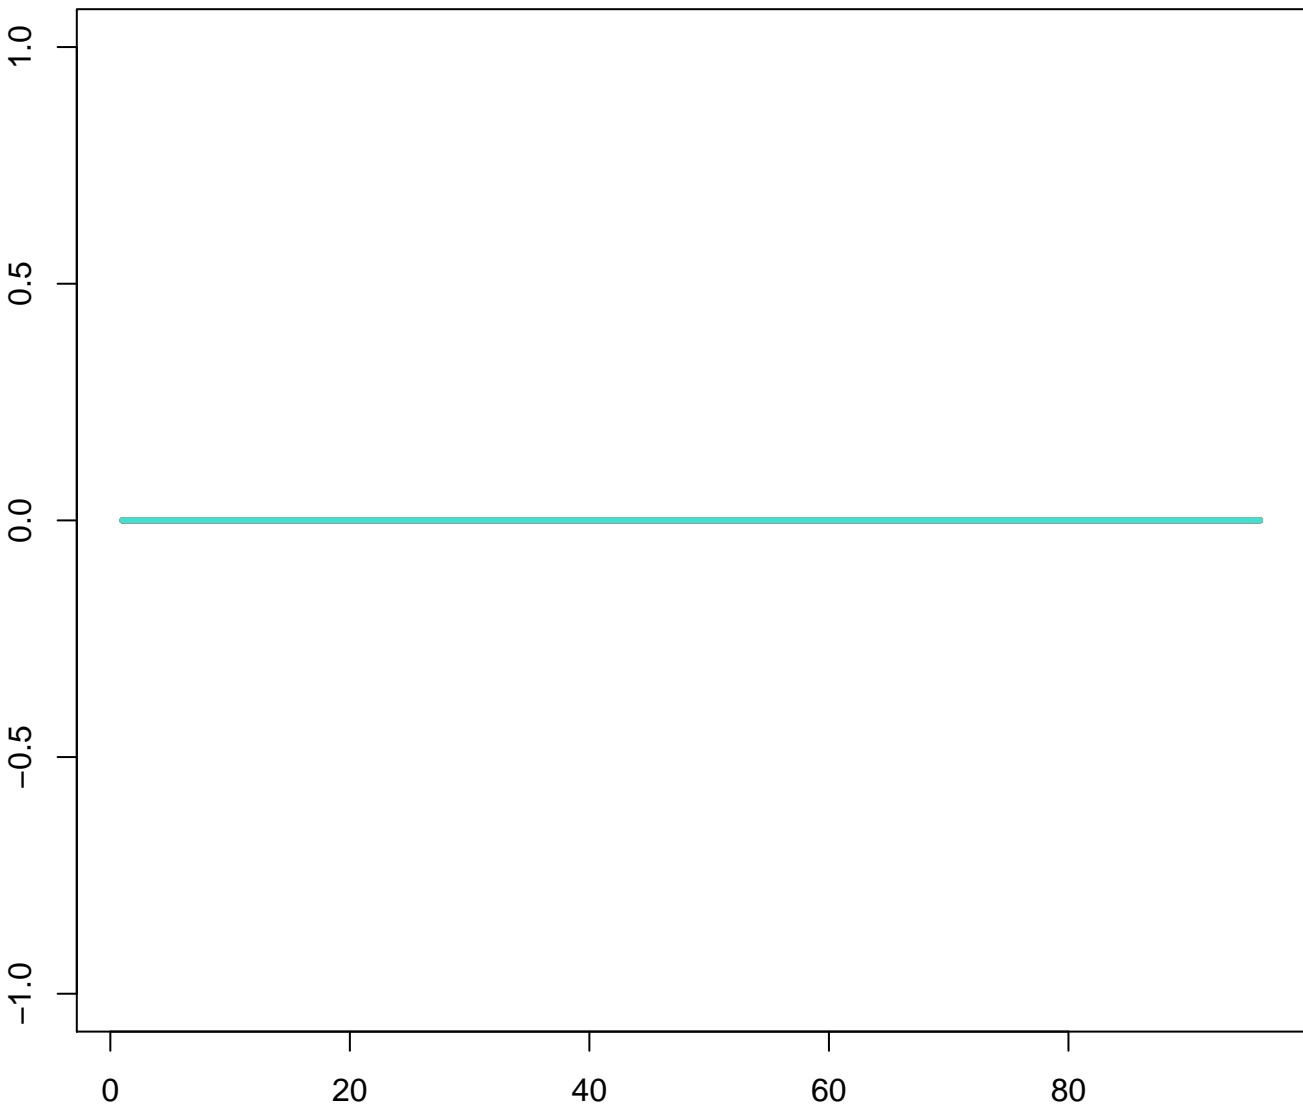

blood brain heart kidney lung ovary skin muscle testis

# 22\_11262816-11262889(+)\_mir-1297\_low

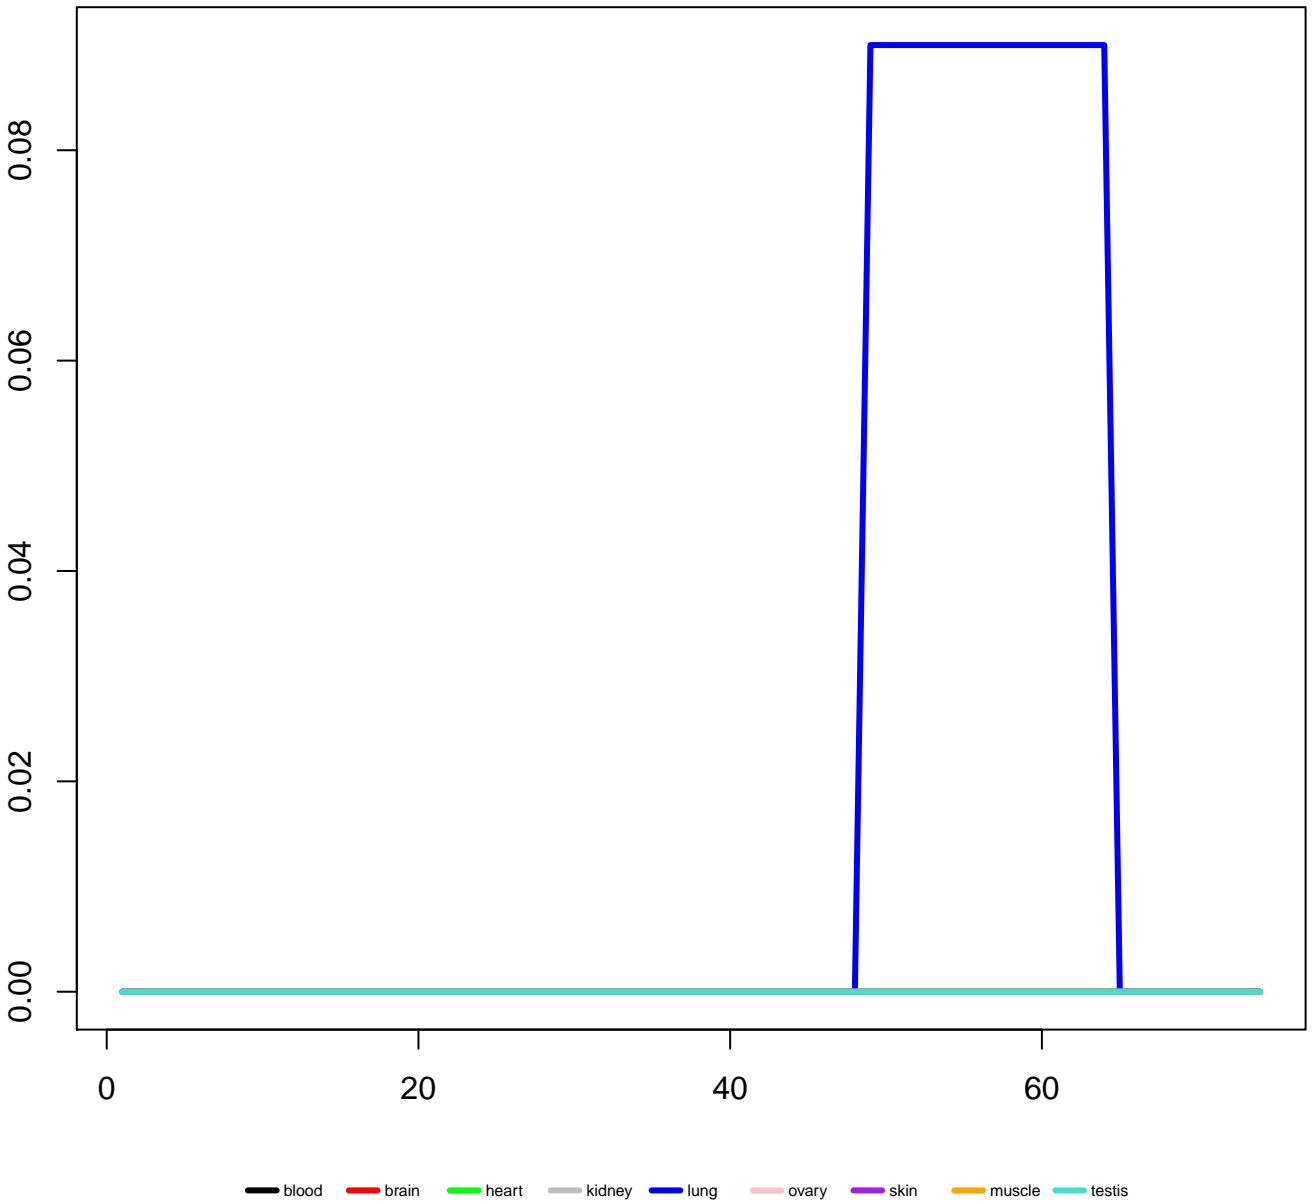



# 22\_42478138-42478229(+)\_cfa-mir-18a\_high

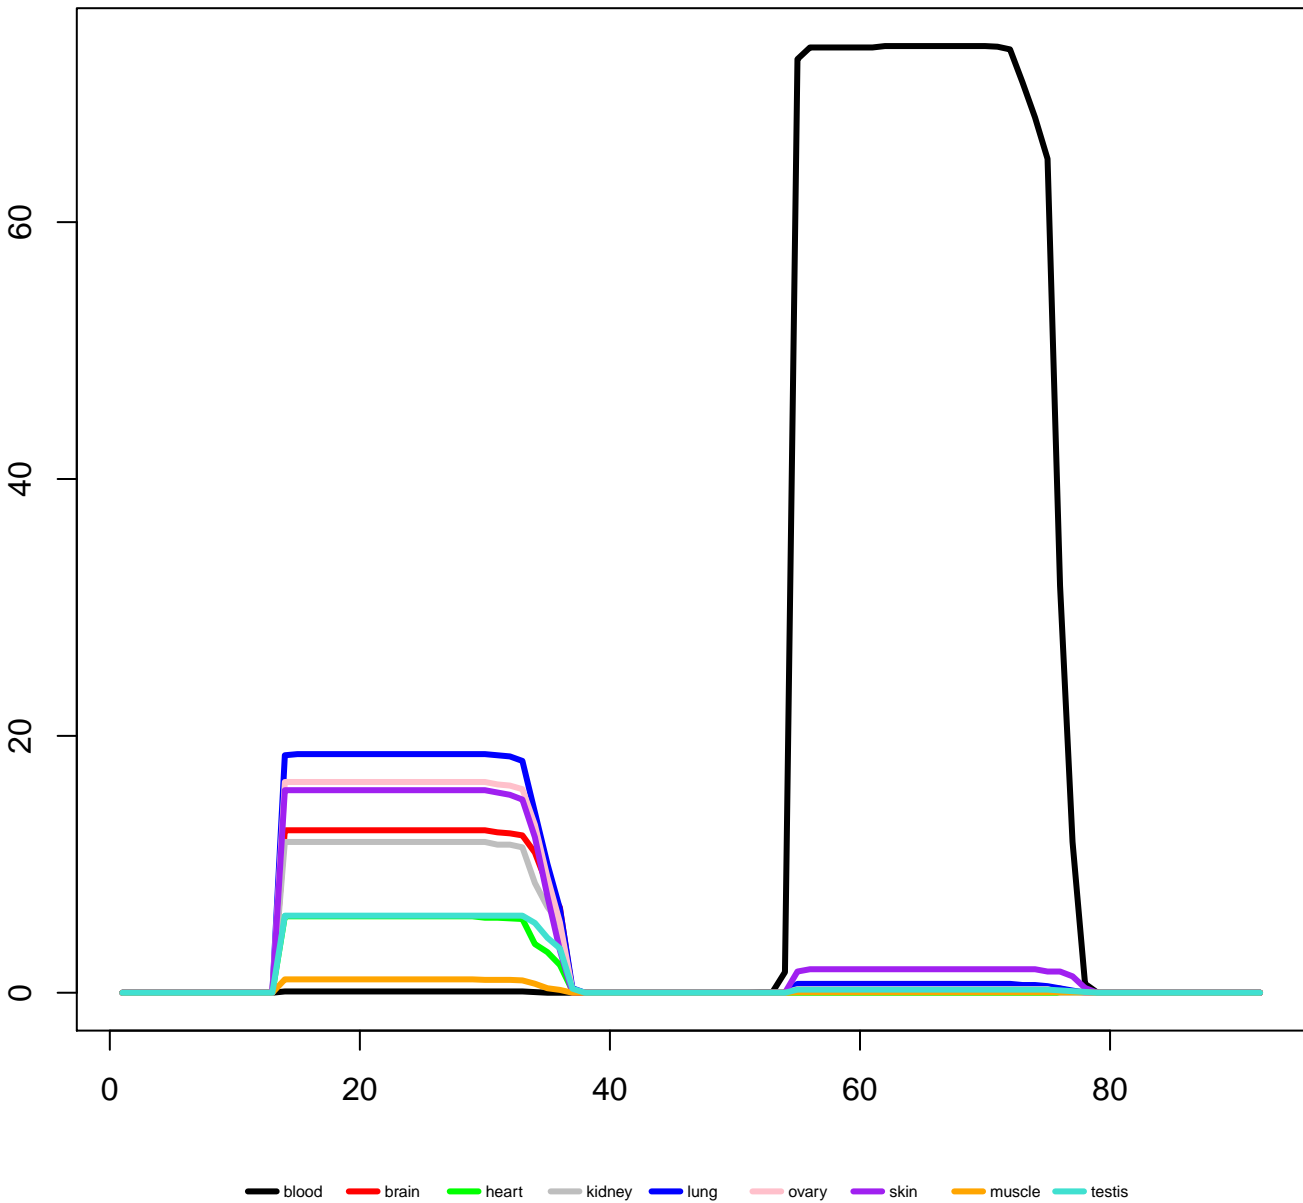



# 22\_42478298-42478355(+)\_cfa-mir-19a\_high

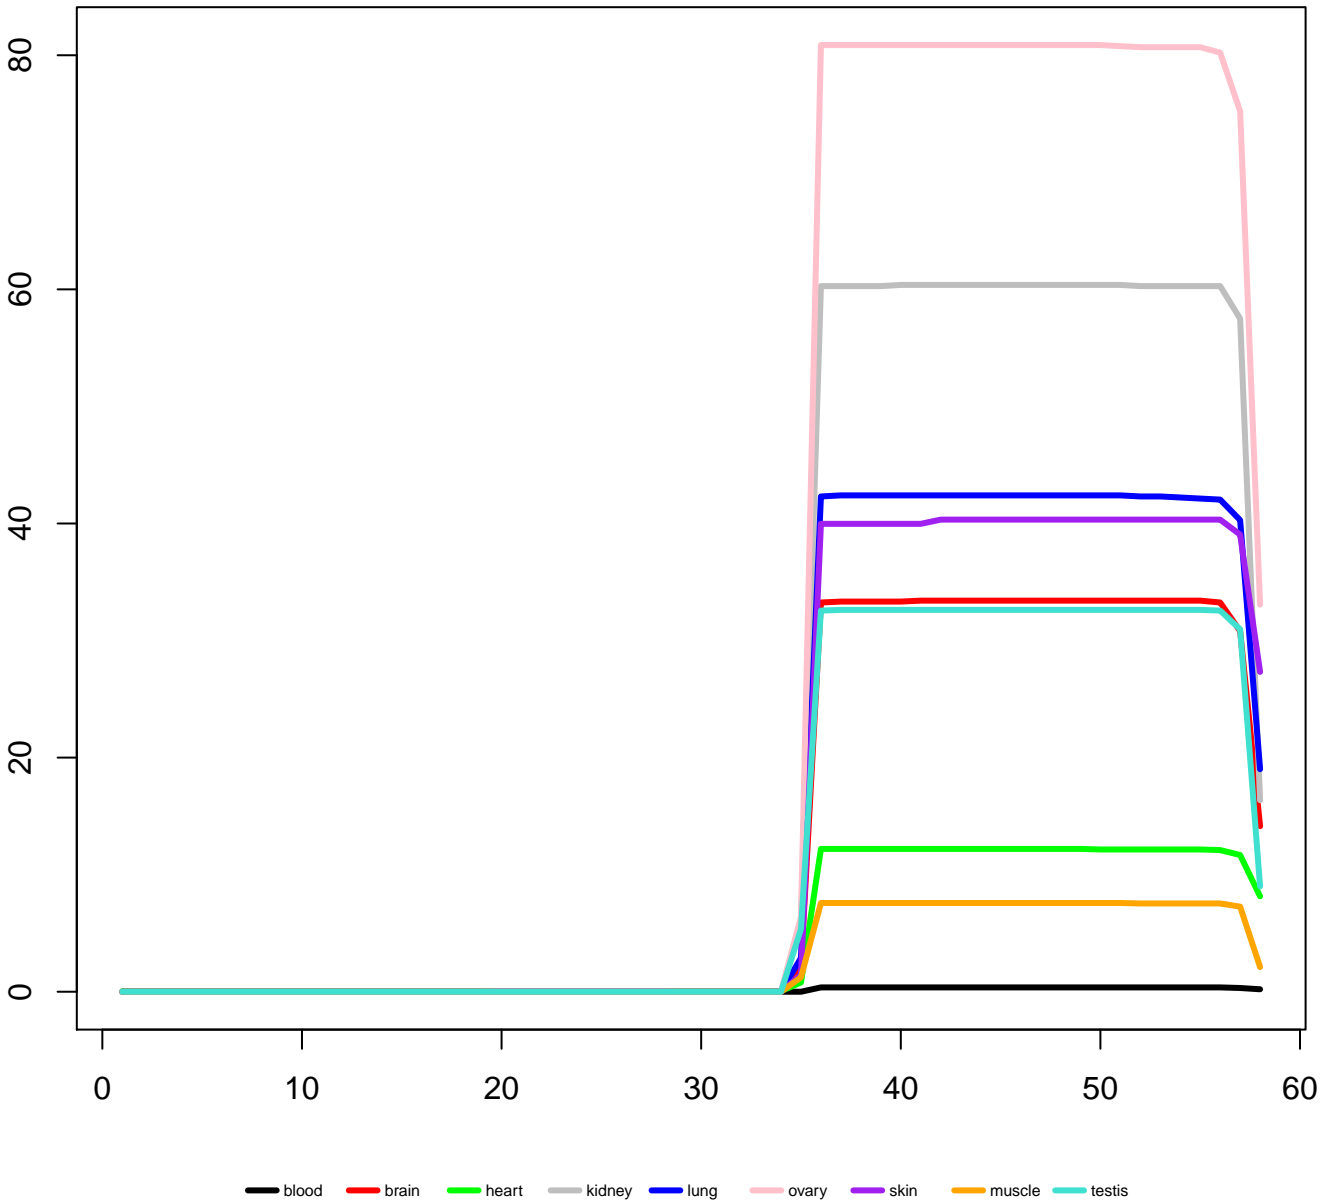



# 22\_42478598-42478656(+)\_cfa-mir-19b-1\_high

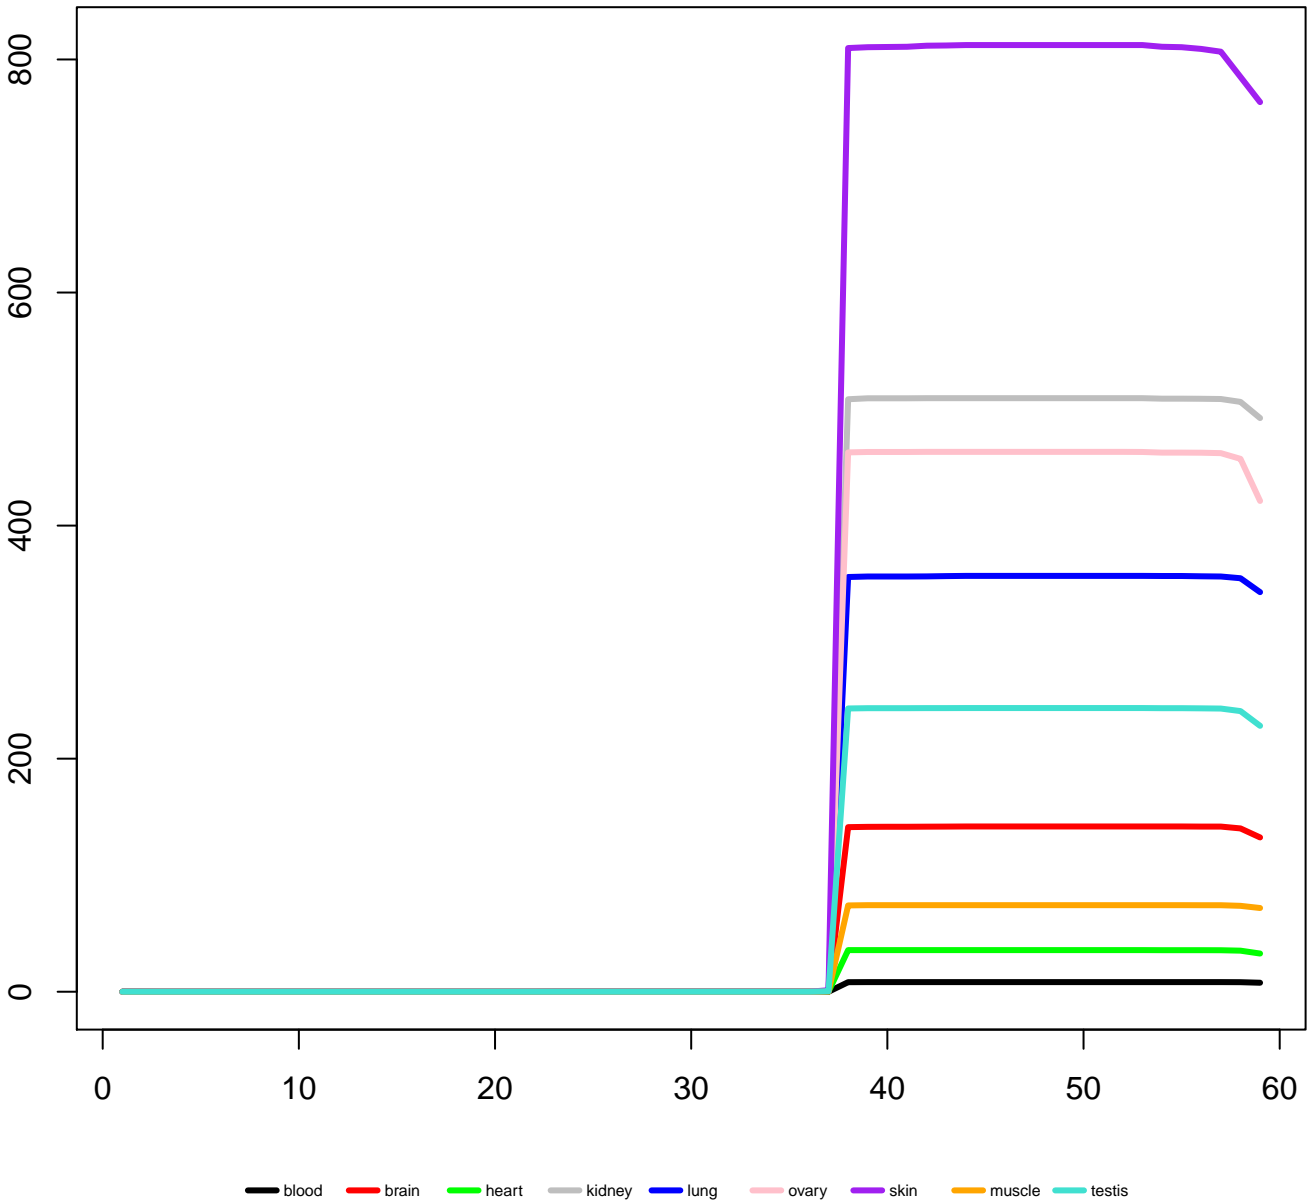

# 22\_42478714-42478772(+)\_cfa-mir-92a-1\_high

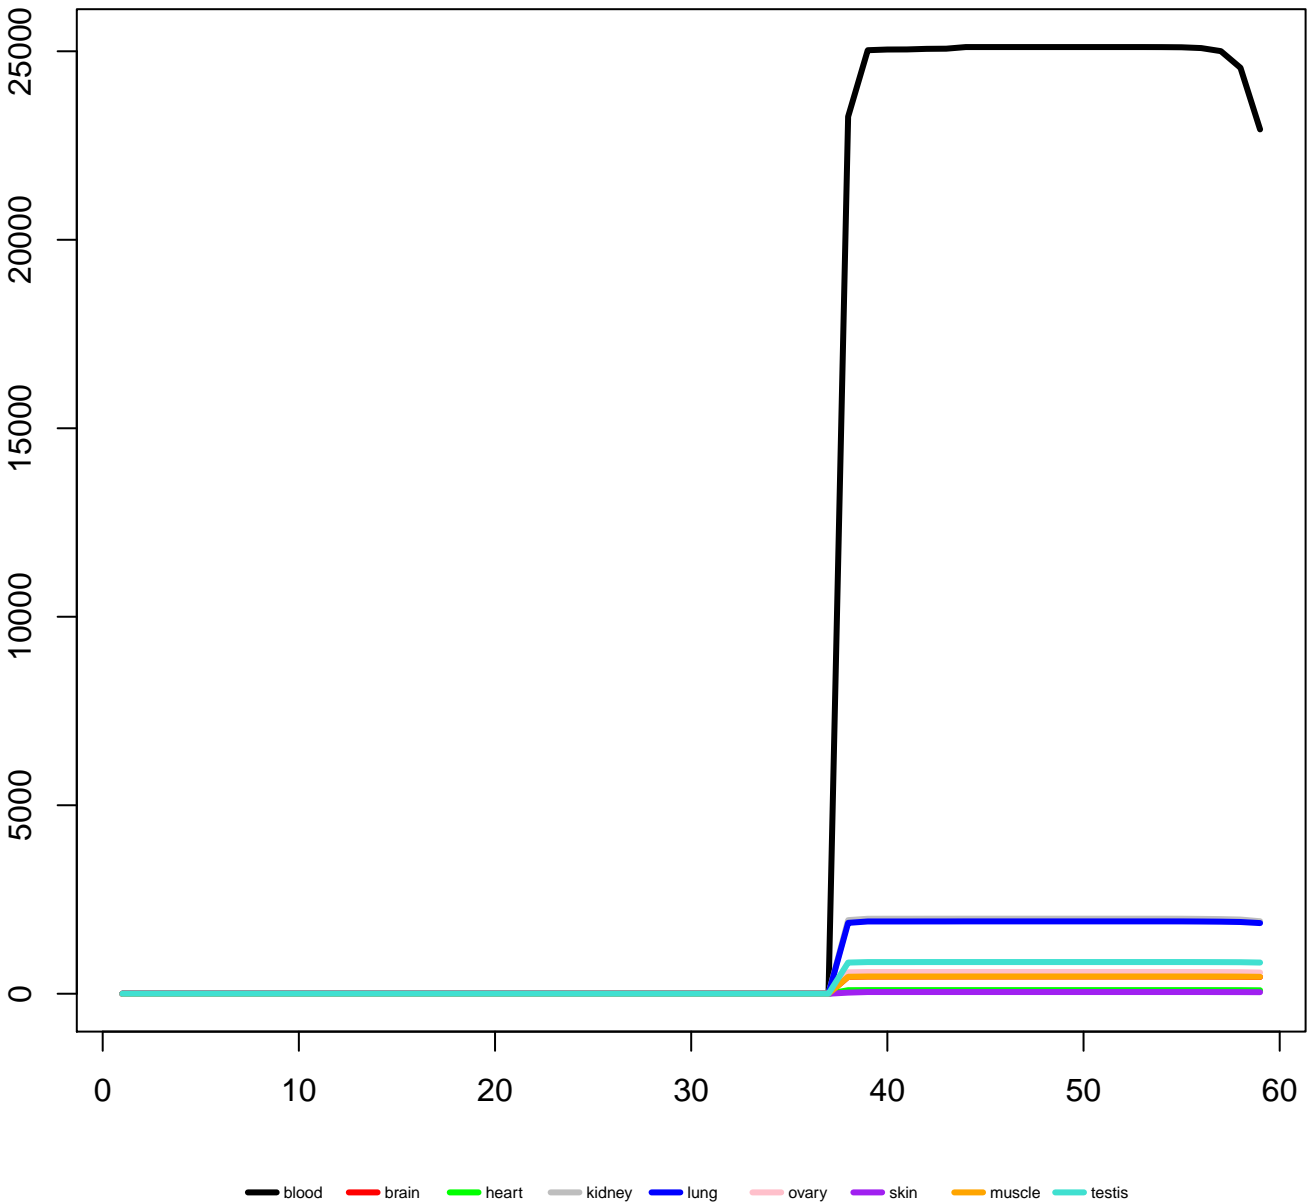

# 22\_55639667-55639805(+)\_mir-9334\_low

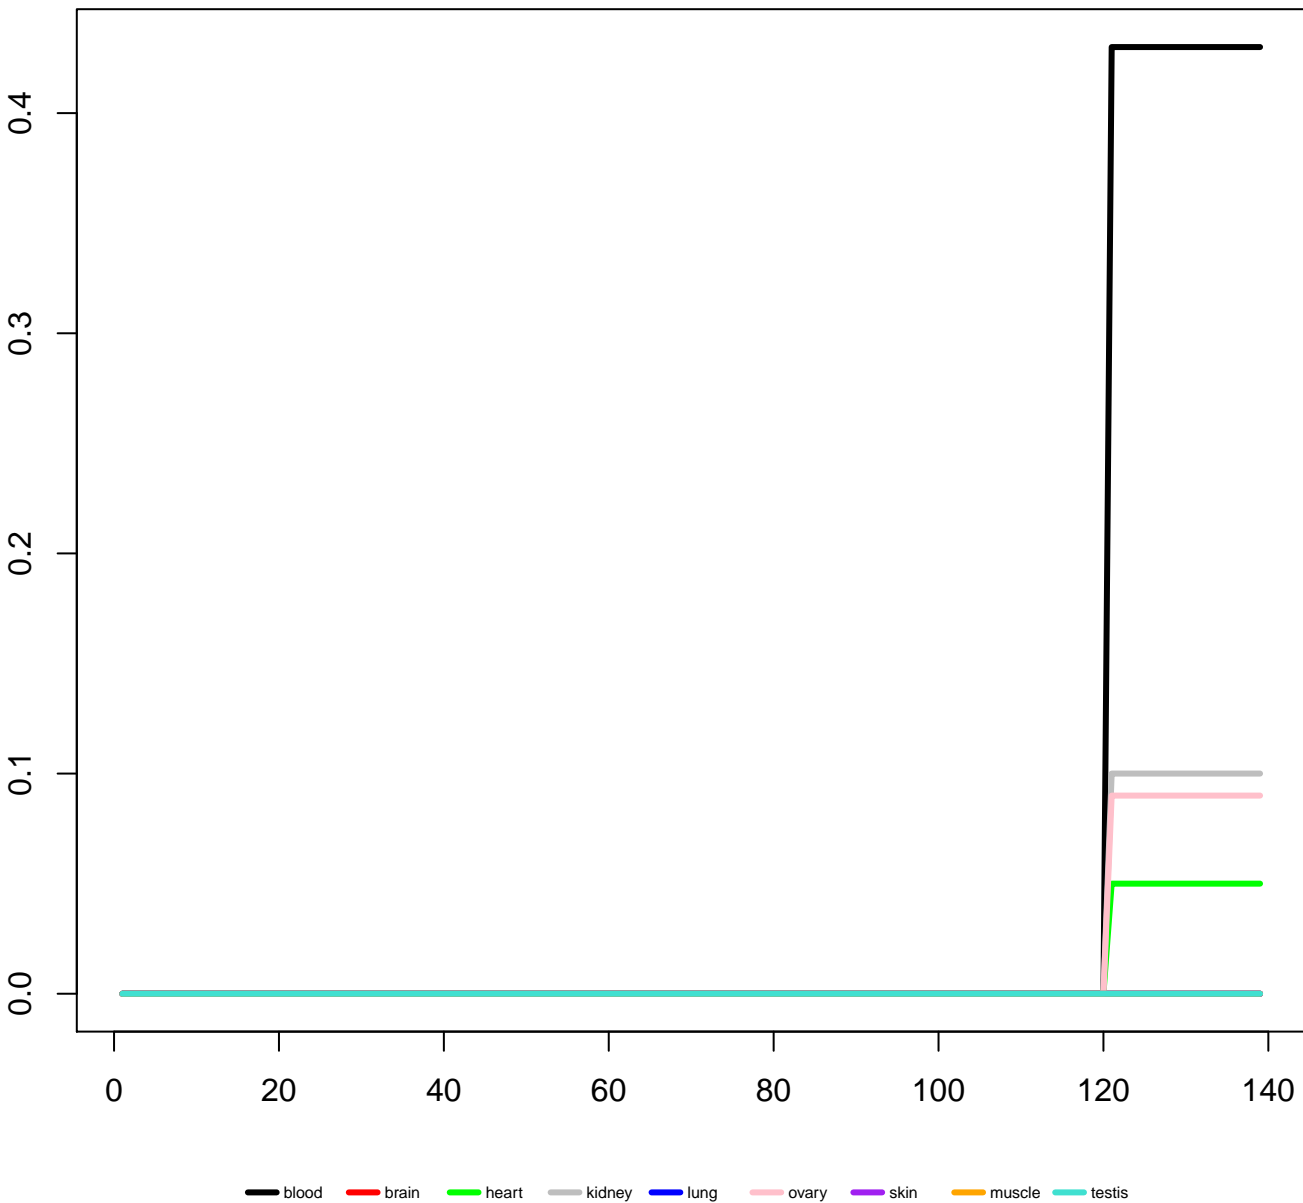

# 23\_1777021-1777133(+)\_cfa-mir-8807\_low

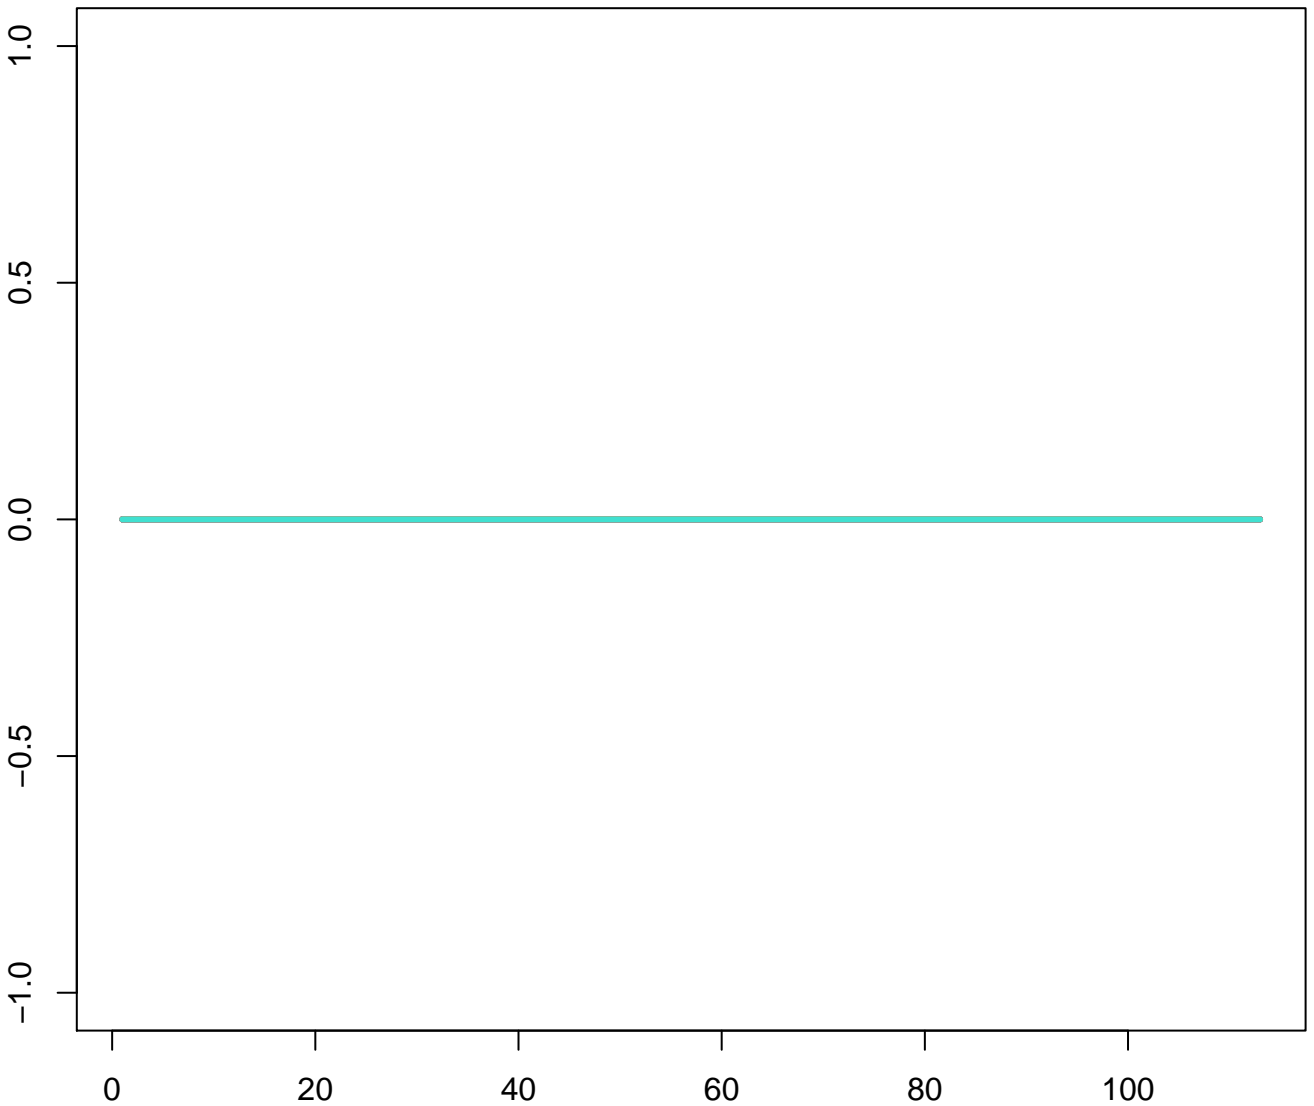

blood brain heart kidney lung ovary skin muscle testis



# 23\_5826463-5826520(+)\_cfa-mir-128-2\_high

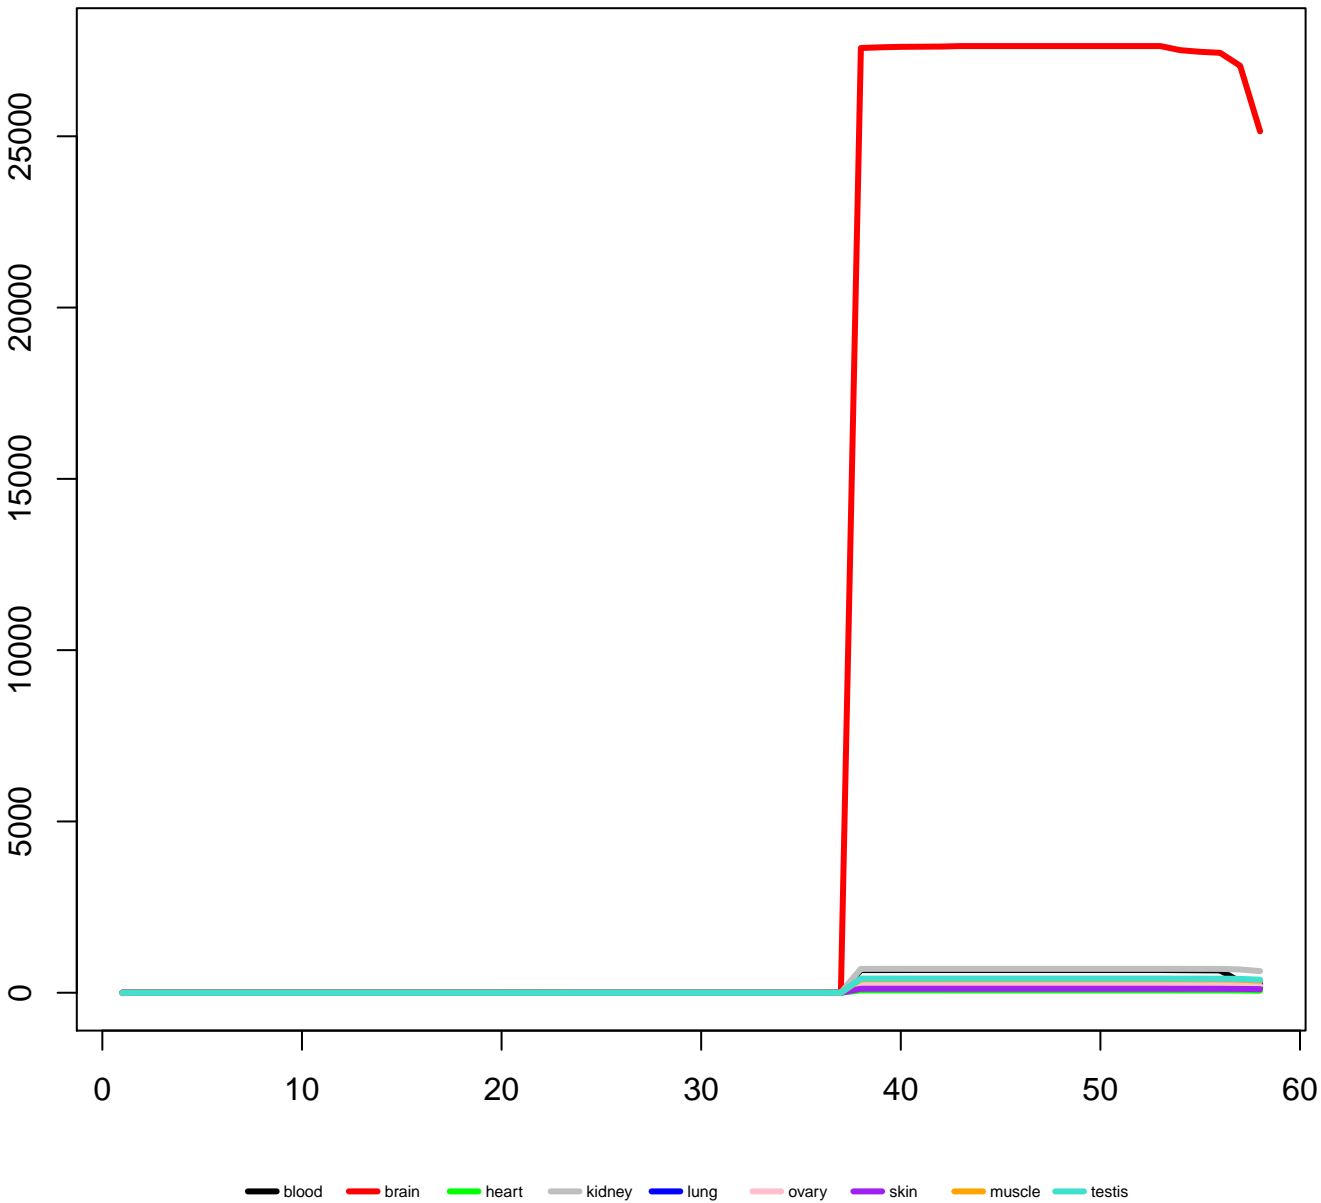





# 23\_12234924-12235064(-)\_cfa-mir-8806\_low

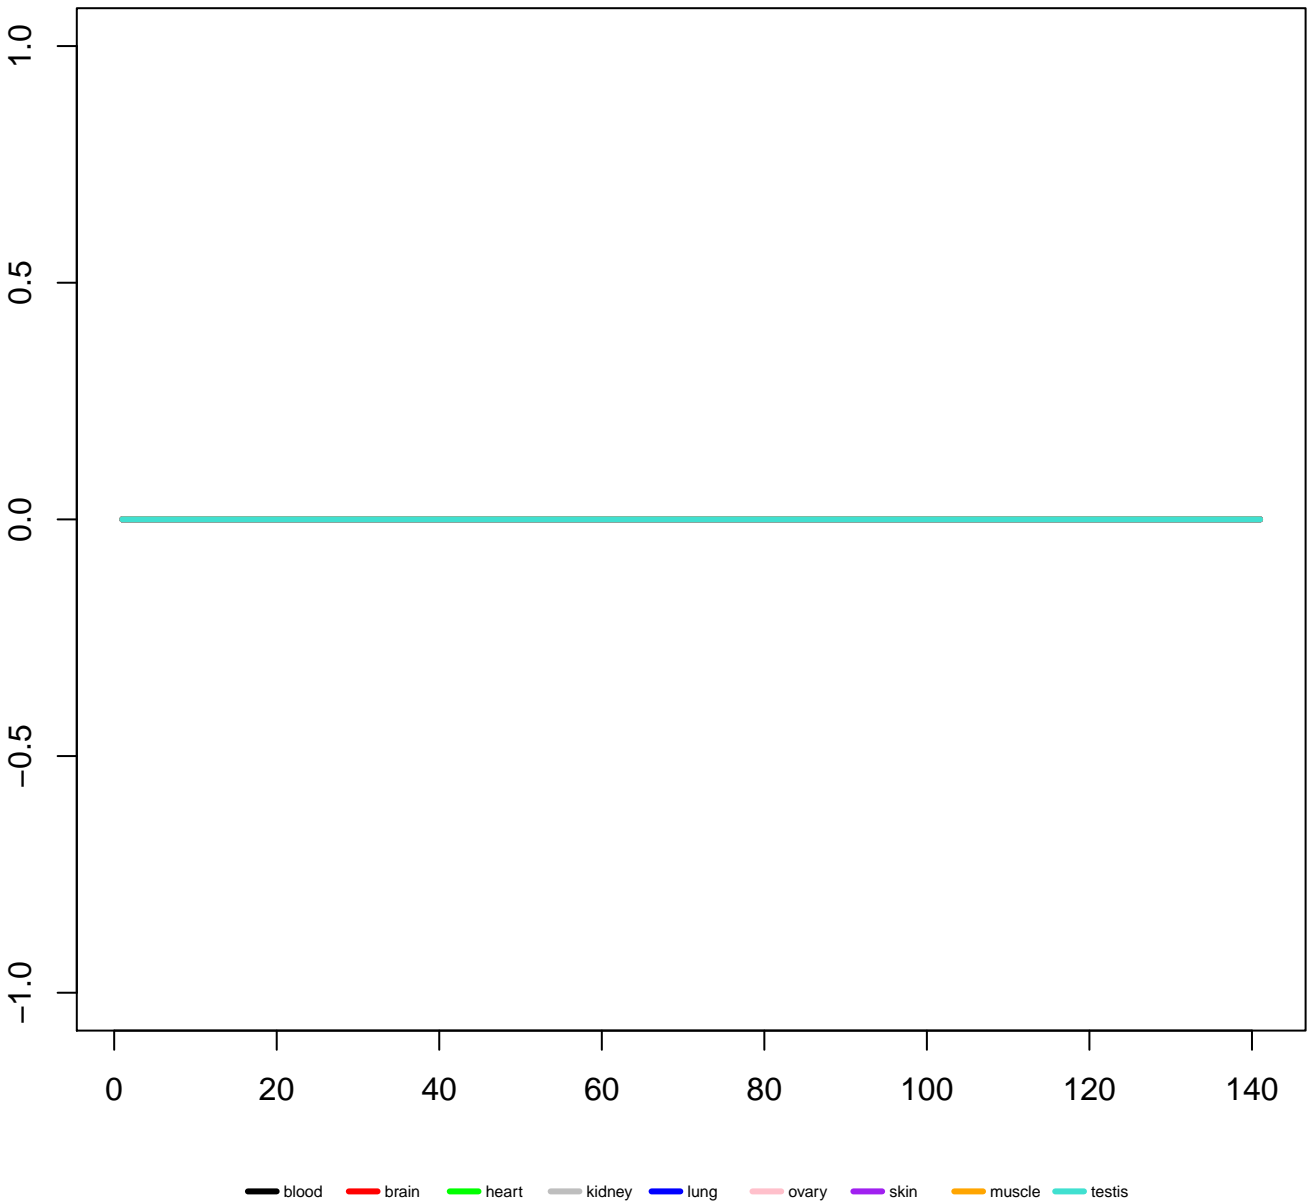

# 23\_49185460-49185566(+)\_cfa-mir-8808\_low

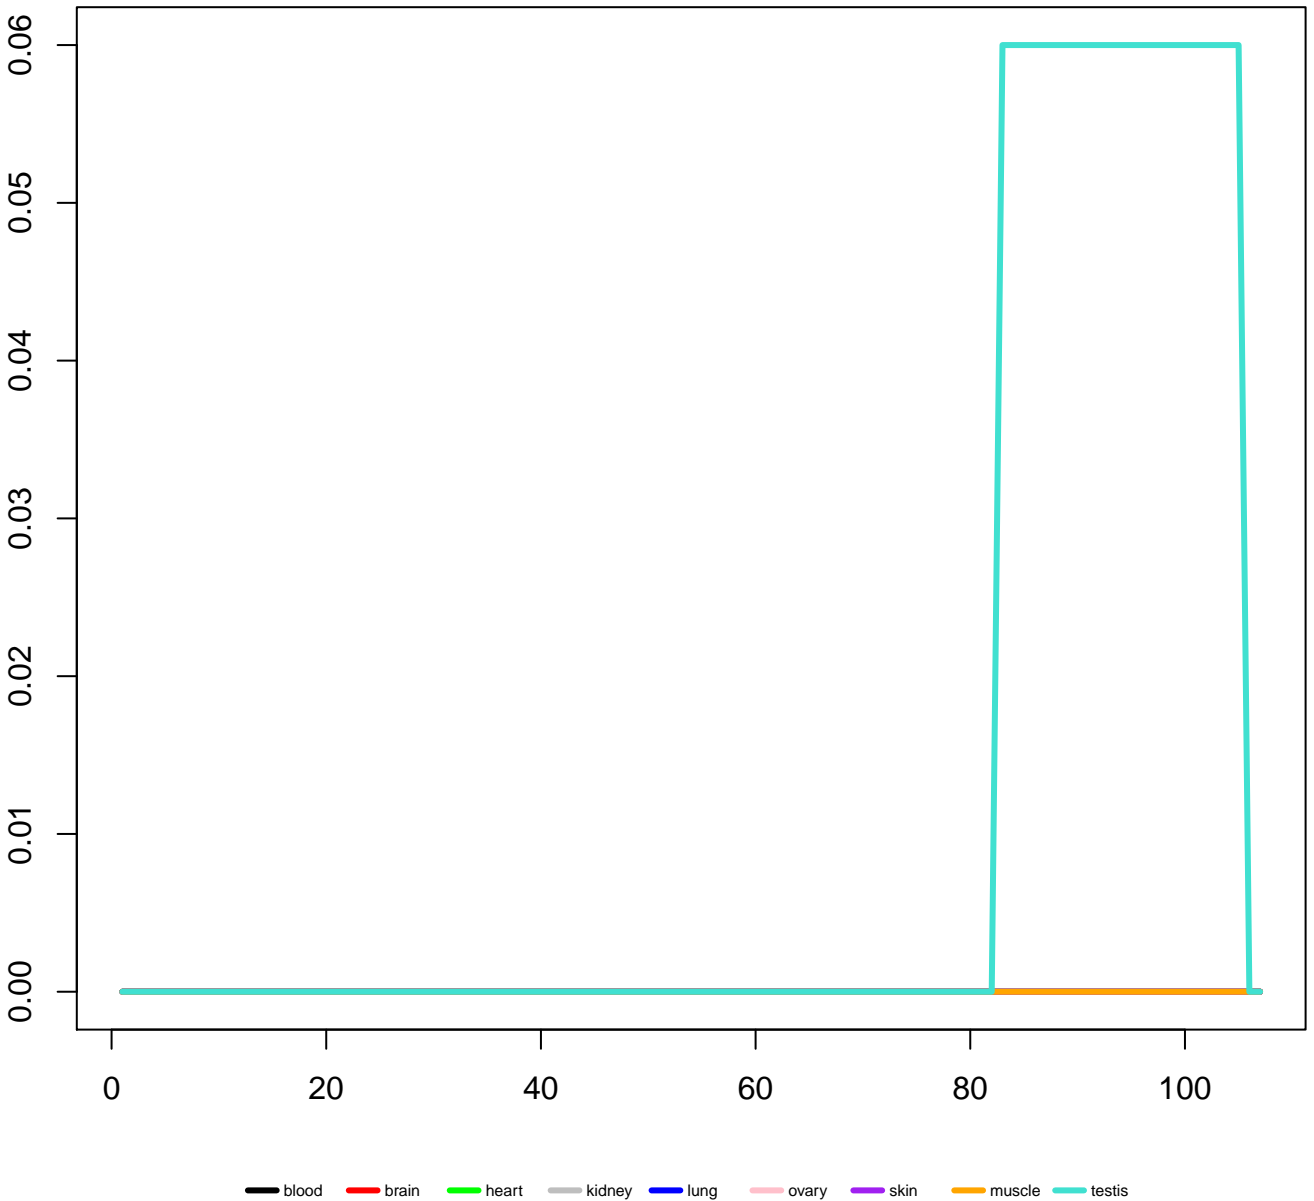

# 24\_17468354-17468430(-)\_cfa-mir-103-2\_high

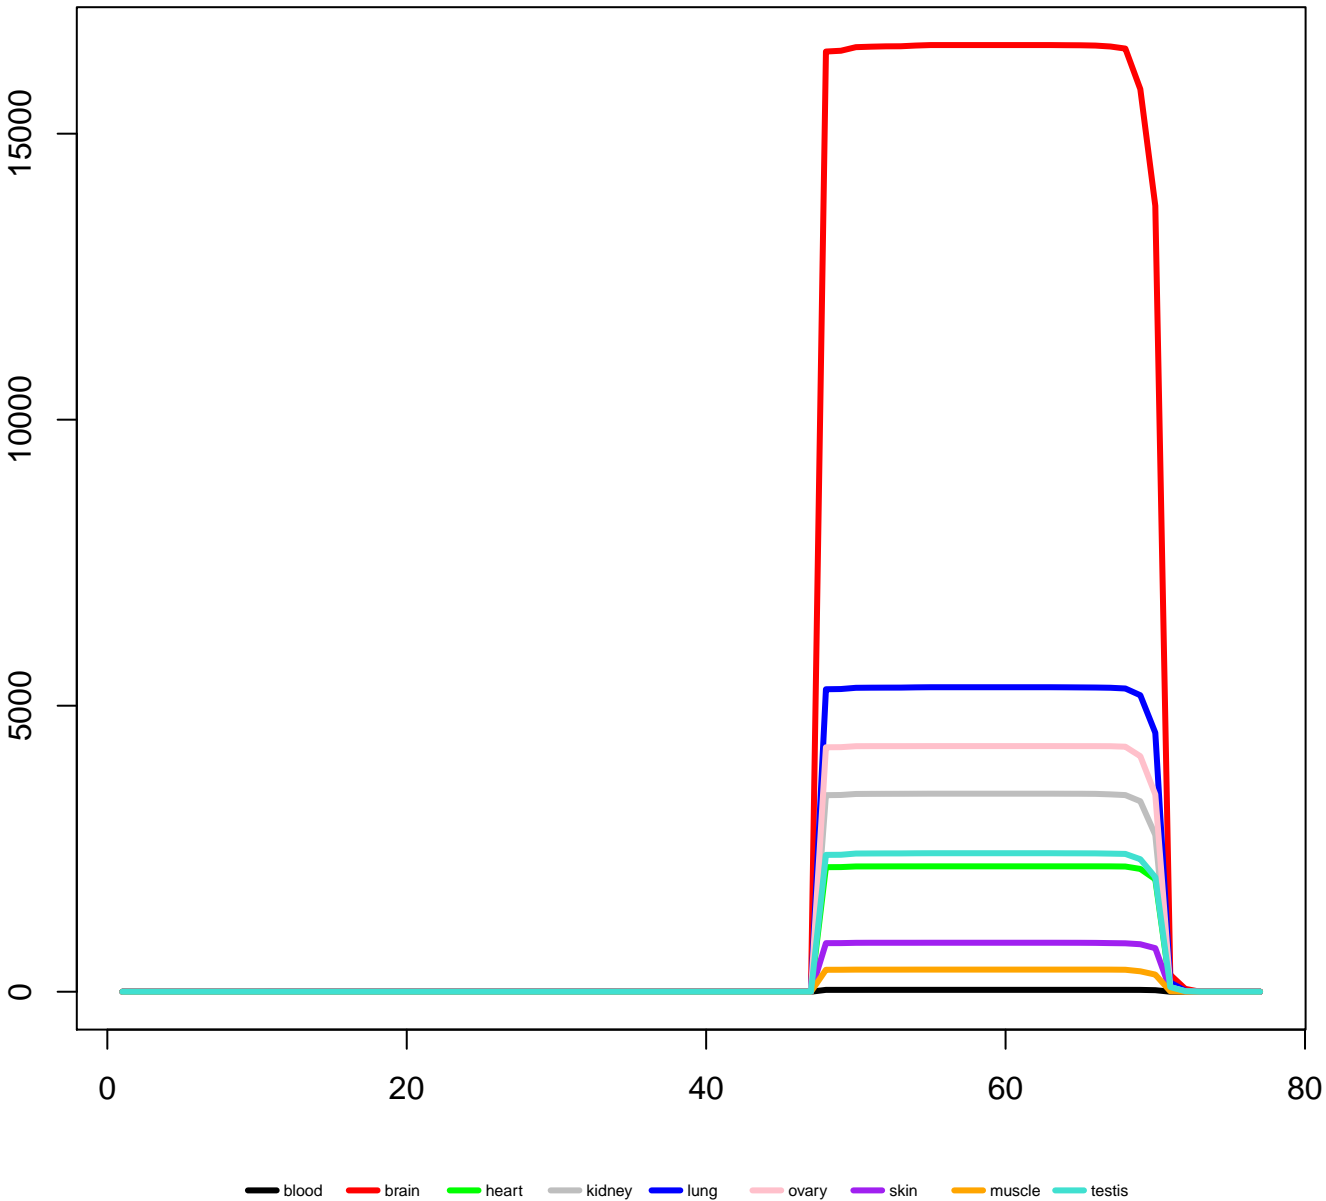

# 24\_24029549-24029607(+)\_cfa-mir-499\_high

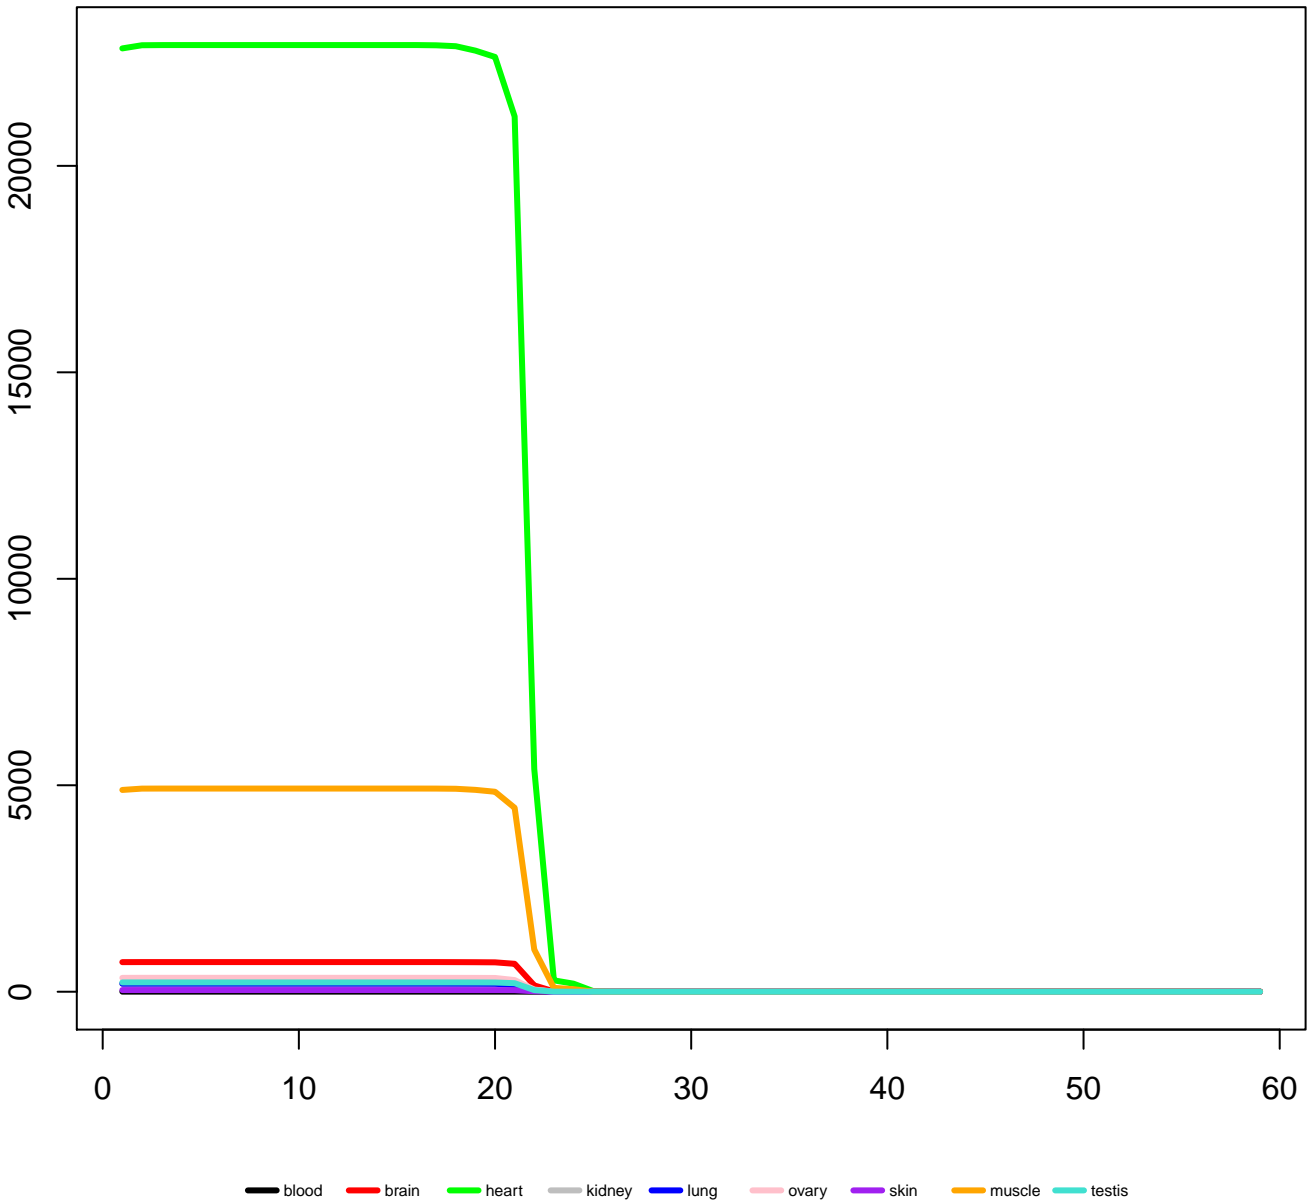









# 24\_47407915-47408059(+)\_cfa-mir-8809\_high

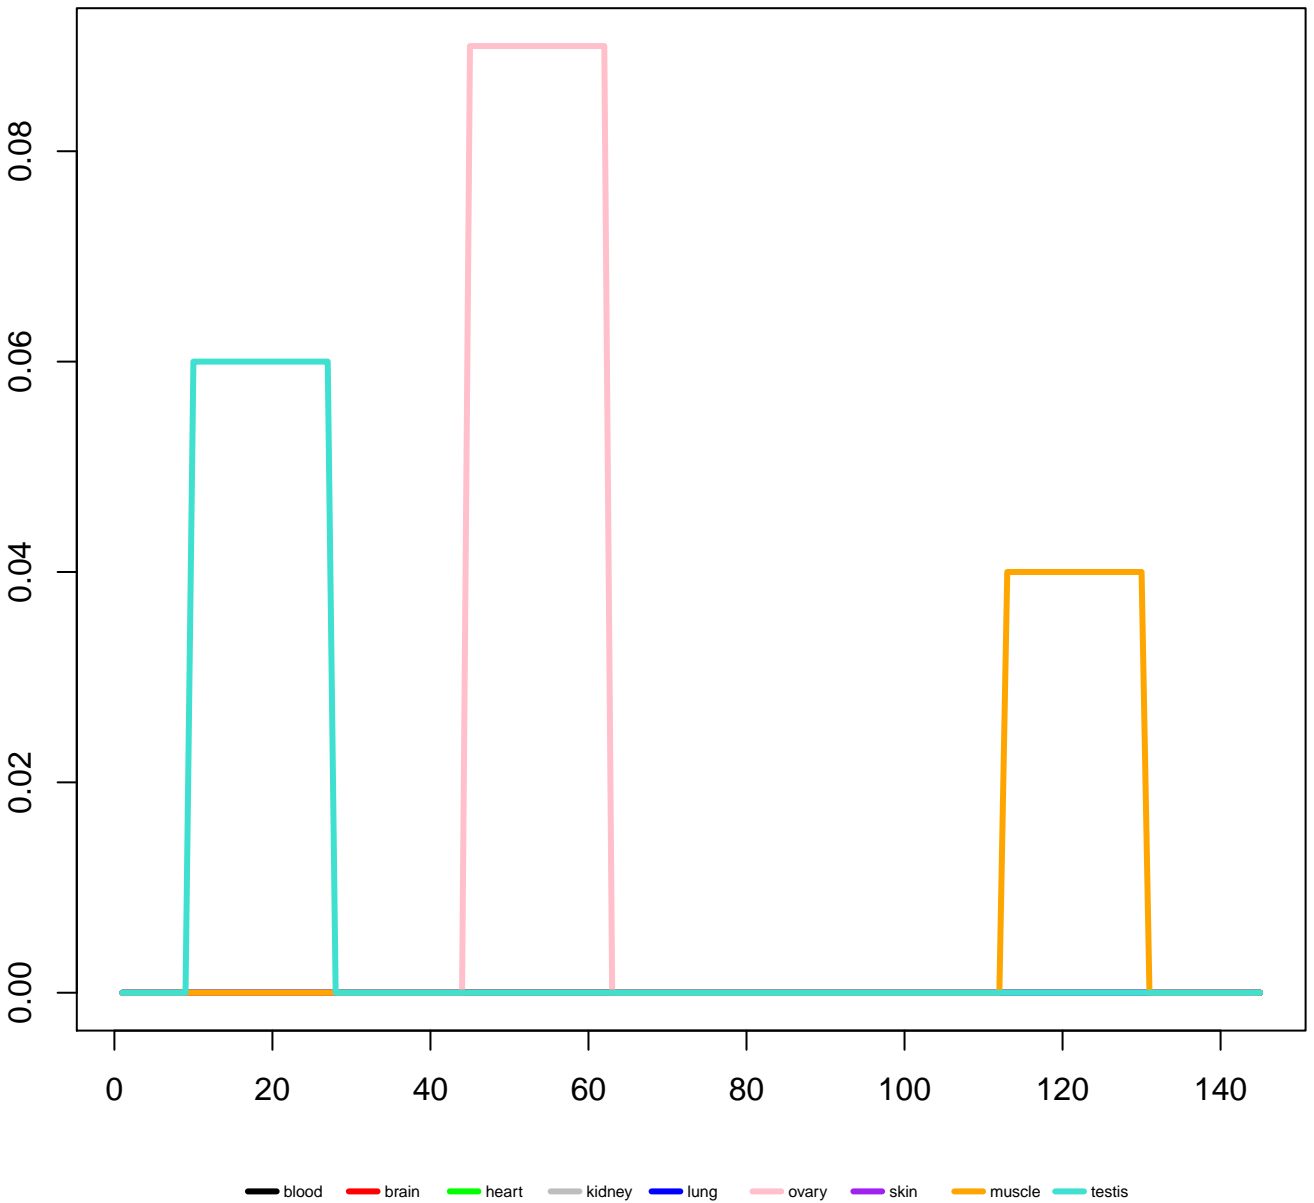



# 25\_9793701-9793845(+)\_cfa-mir-8825\_low



# 25\_19022858-19022996(-)\_cfa-mir-8824\_low

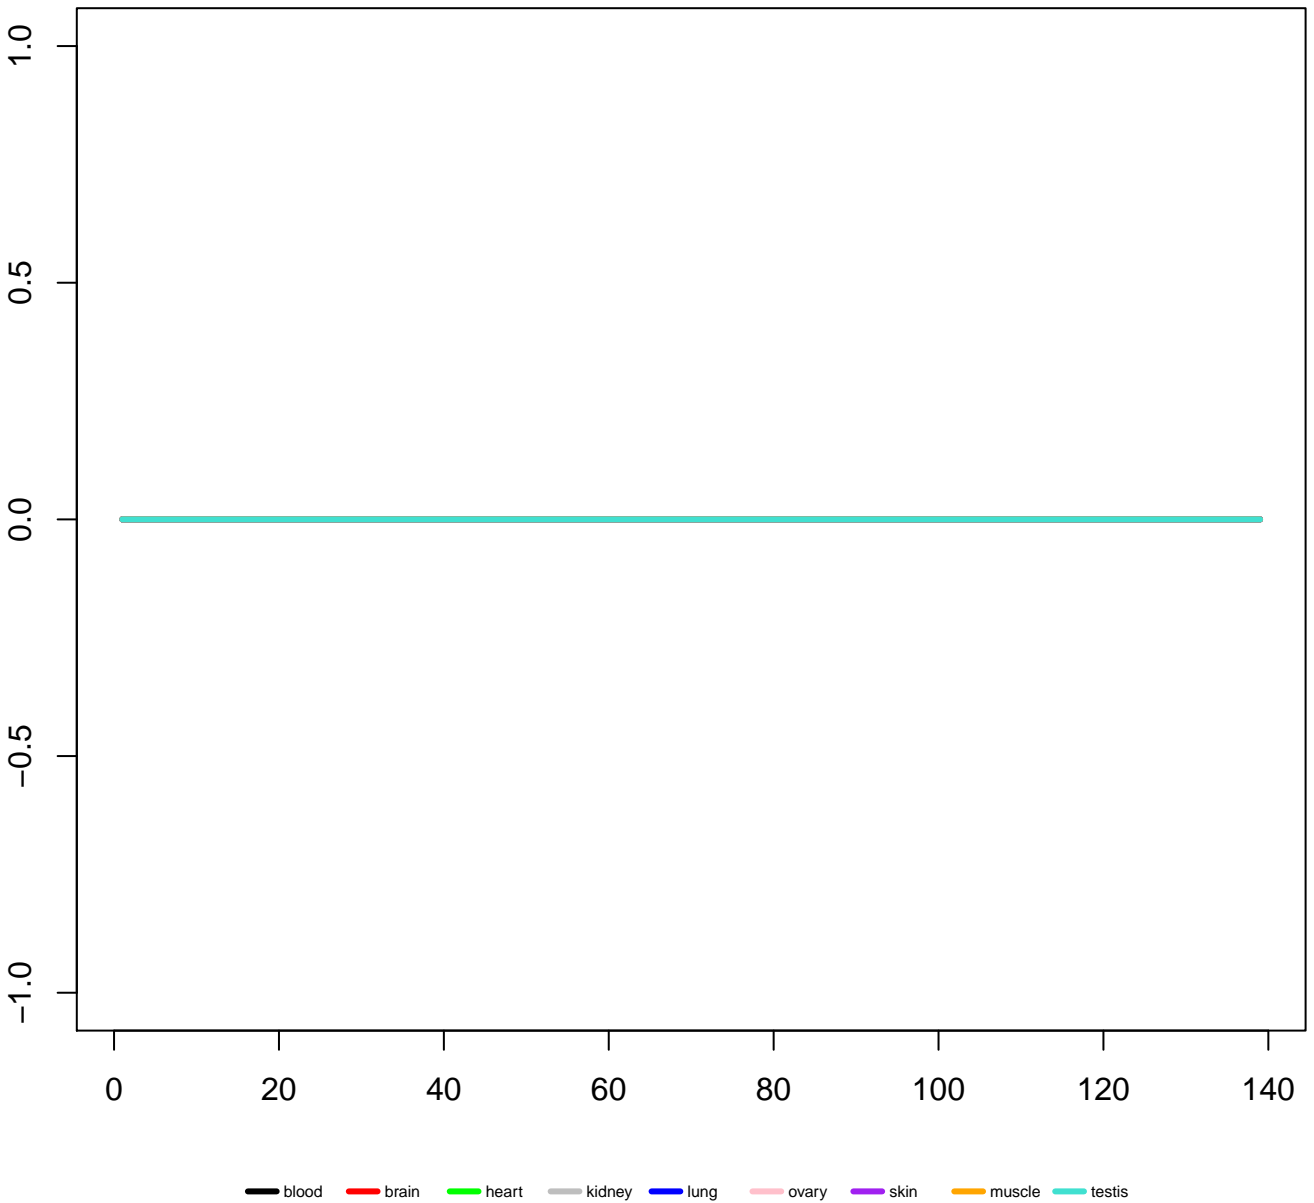

# 25\_19949304-19949446(-)\_cfa-mir-8864-2\_low

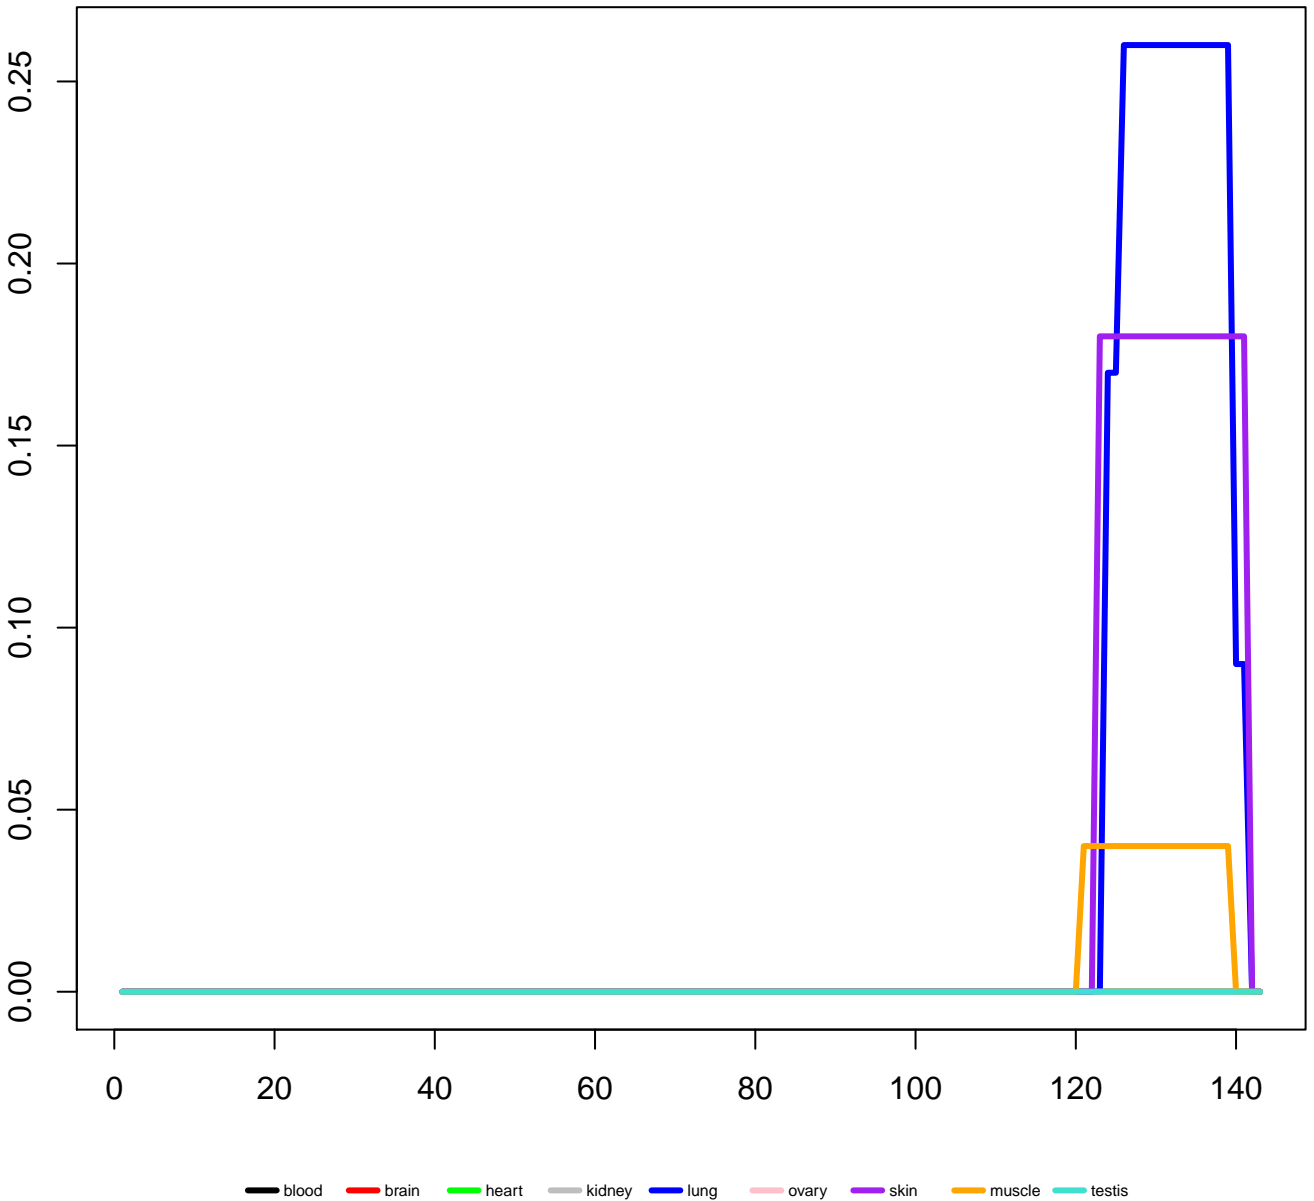

# 25\_27536348-27536482(+)\_cfa-mir-8820\_low

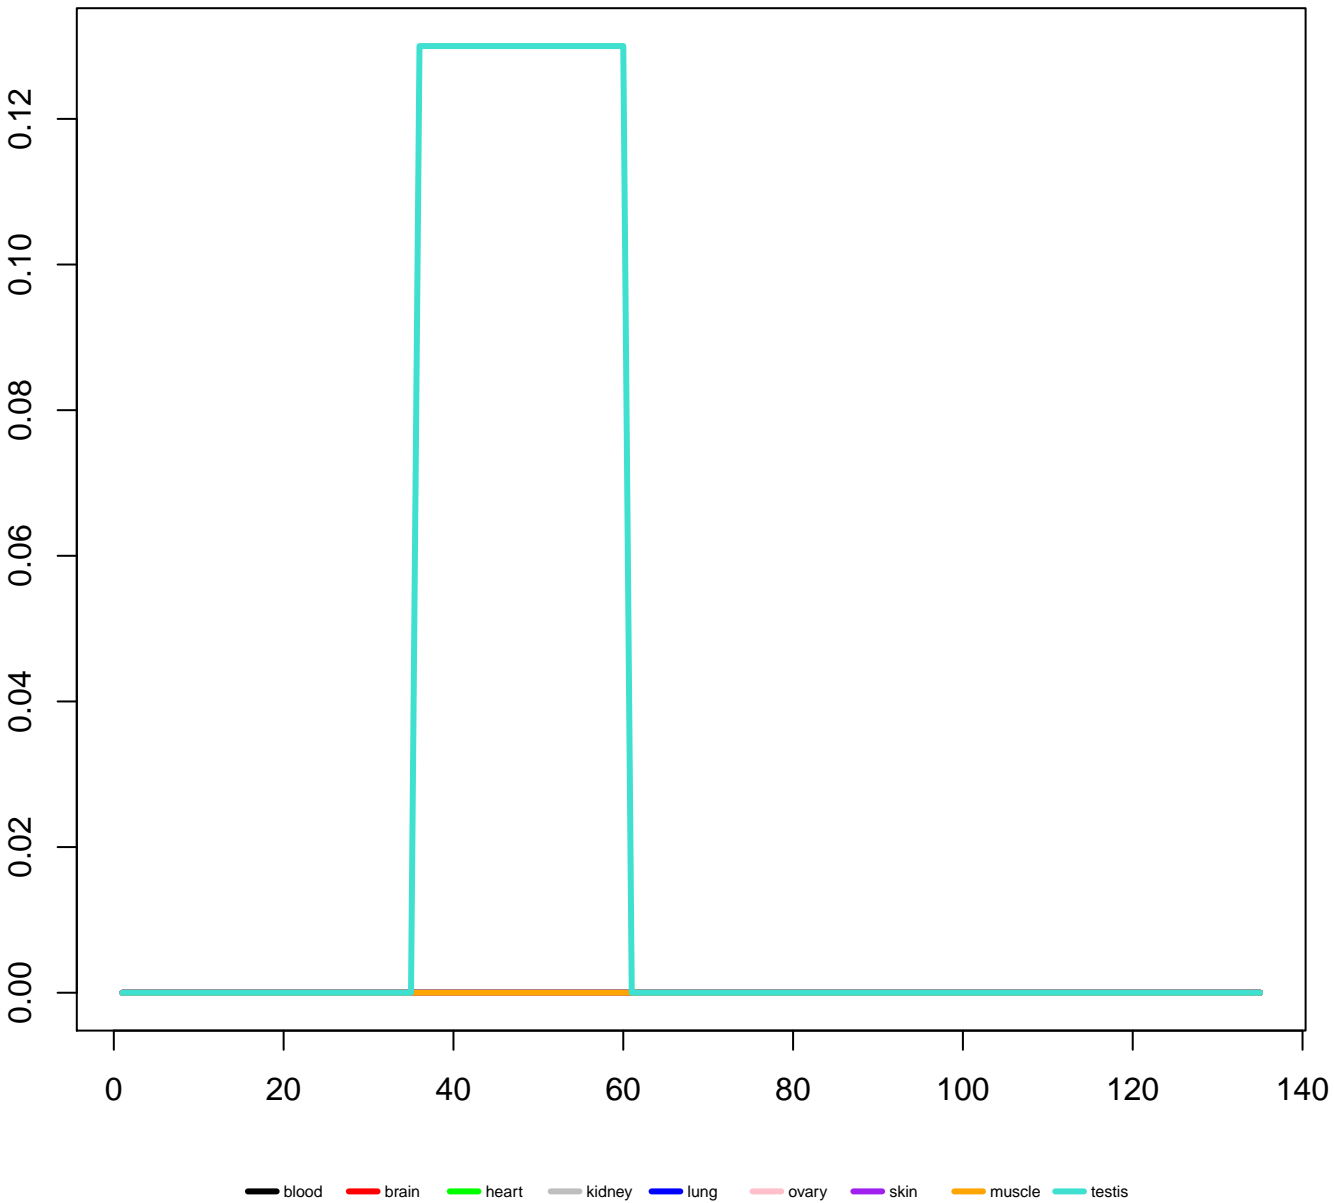

# 25\_28188264-28188322(+)\_cfa-mir-124-1\_high

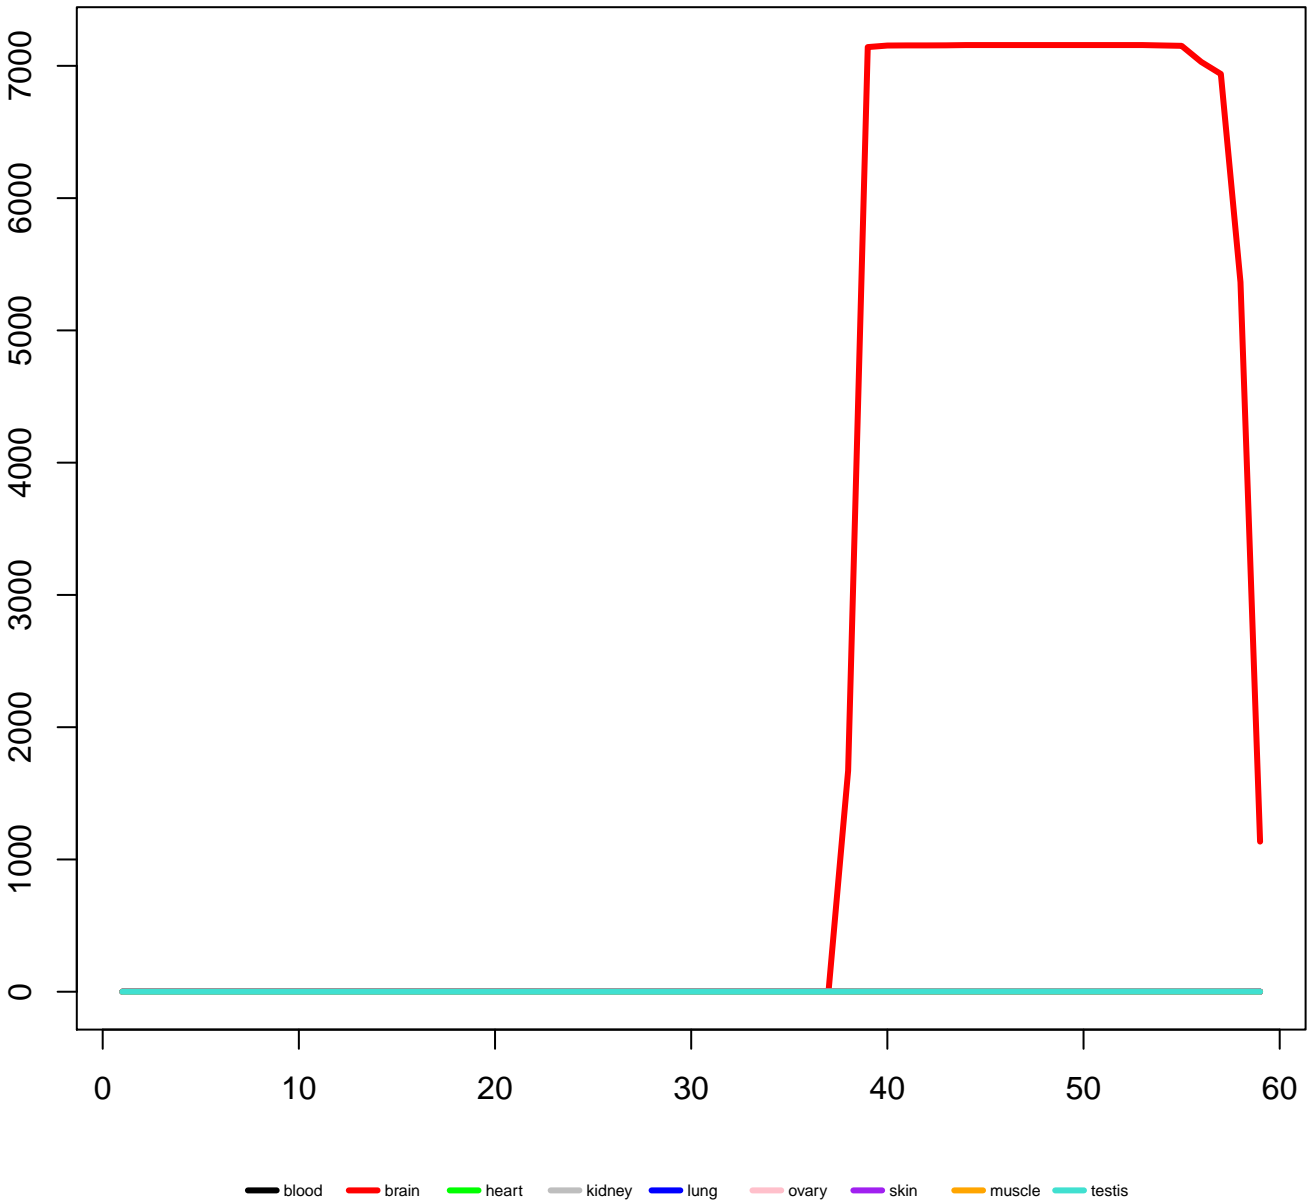

# 25\_28497353-28497481(-)\_cfa-mir-8821\_low

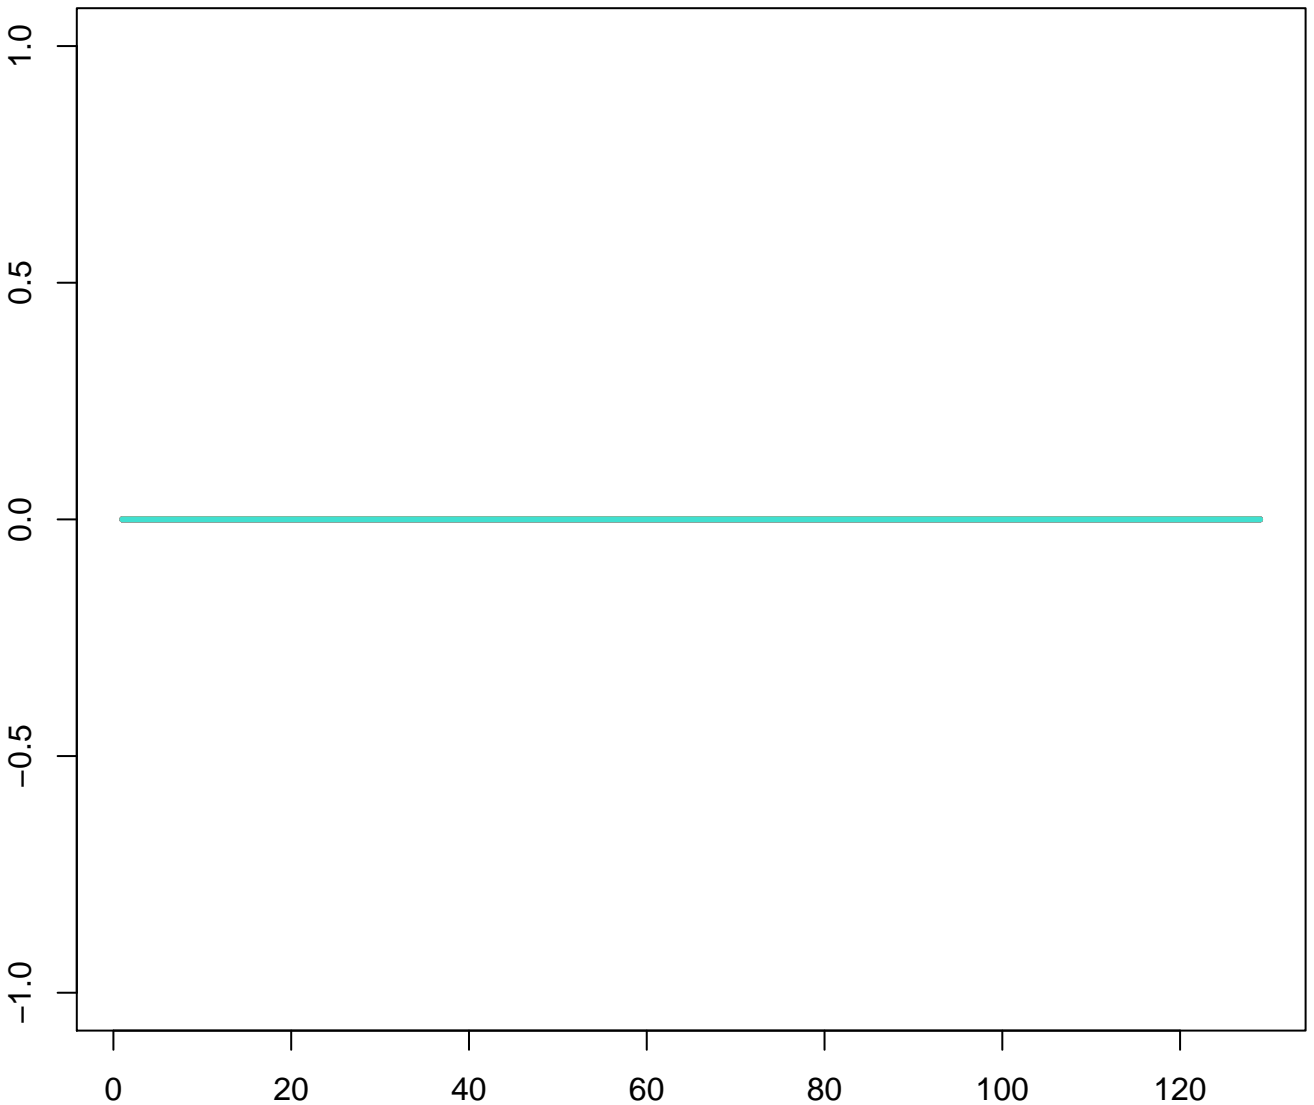

blood brain heart kidney lung ovary skin muscle testis



# 25\_34860432-34860569(-)\_mir-9064\_low

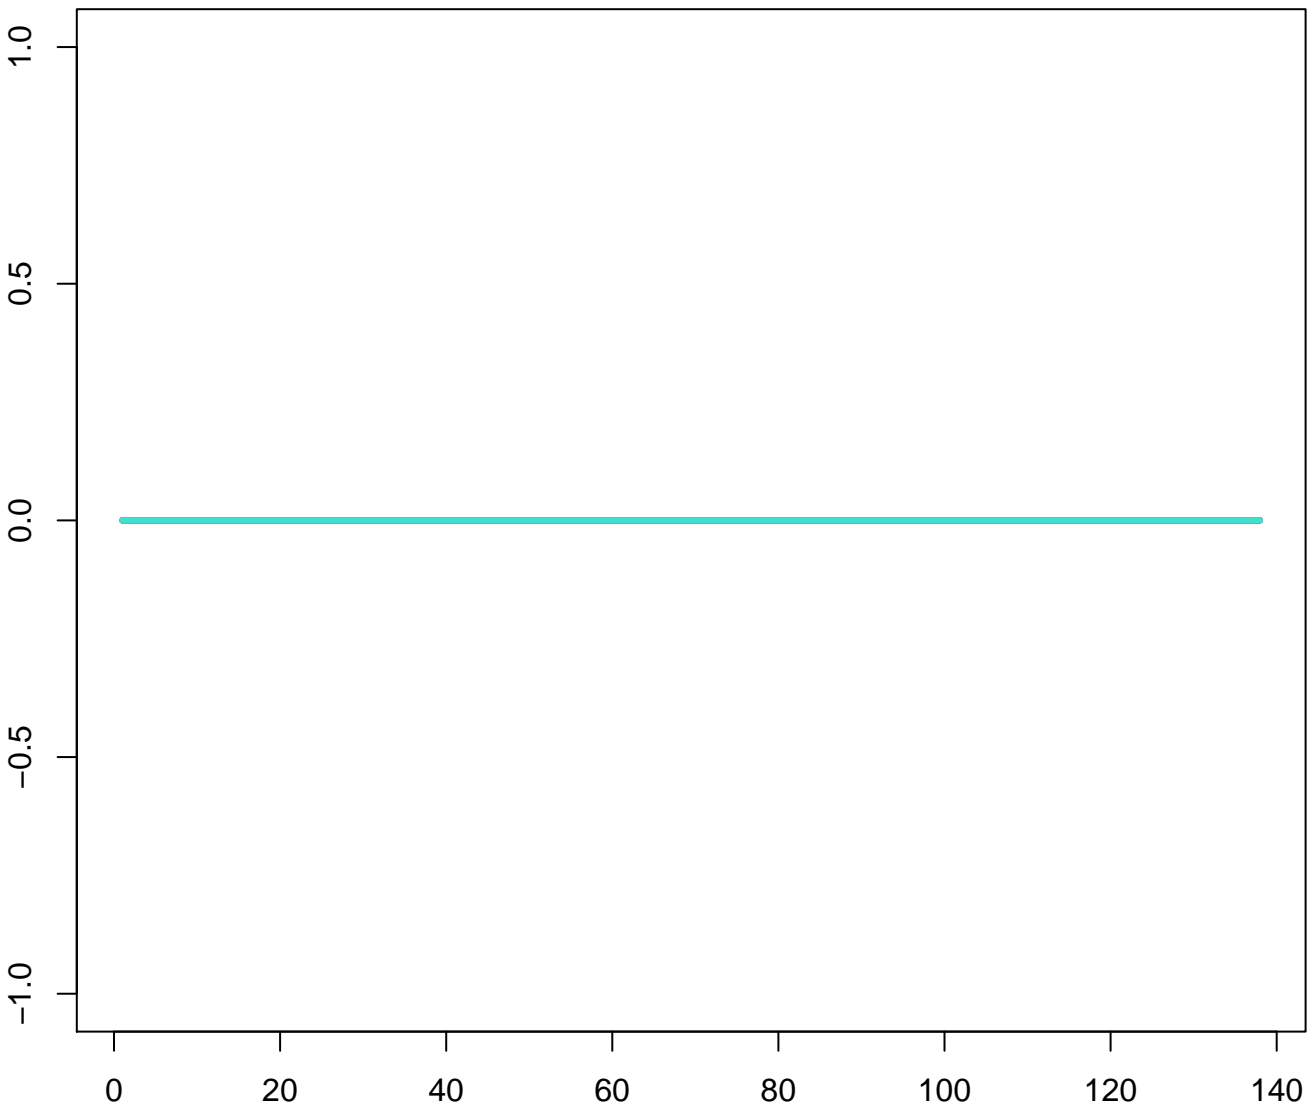

blood brain heart kidney lung ovary skin muscle testis

# 25\_35016676-35016729(+)\_cfa-mir-320\_high

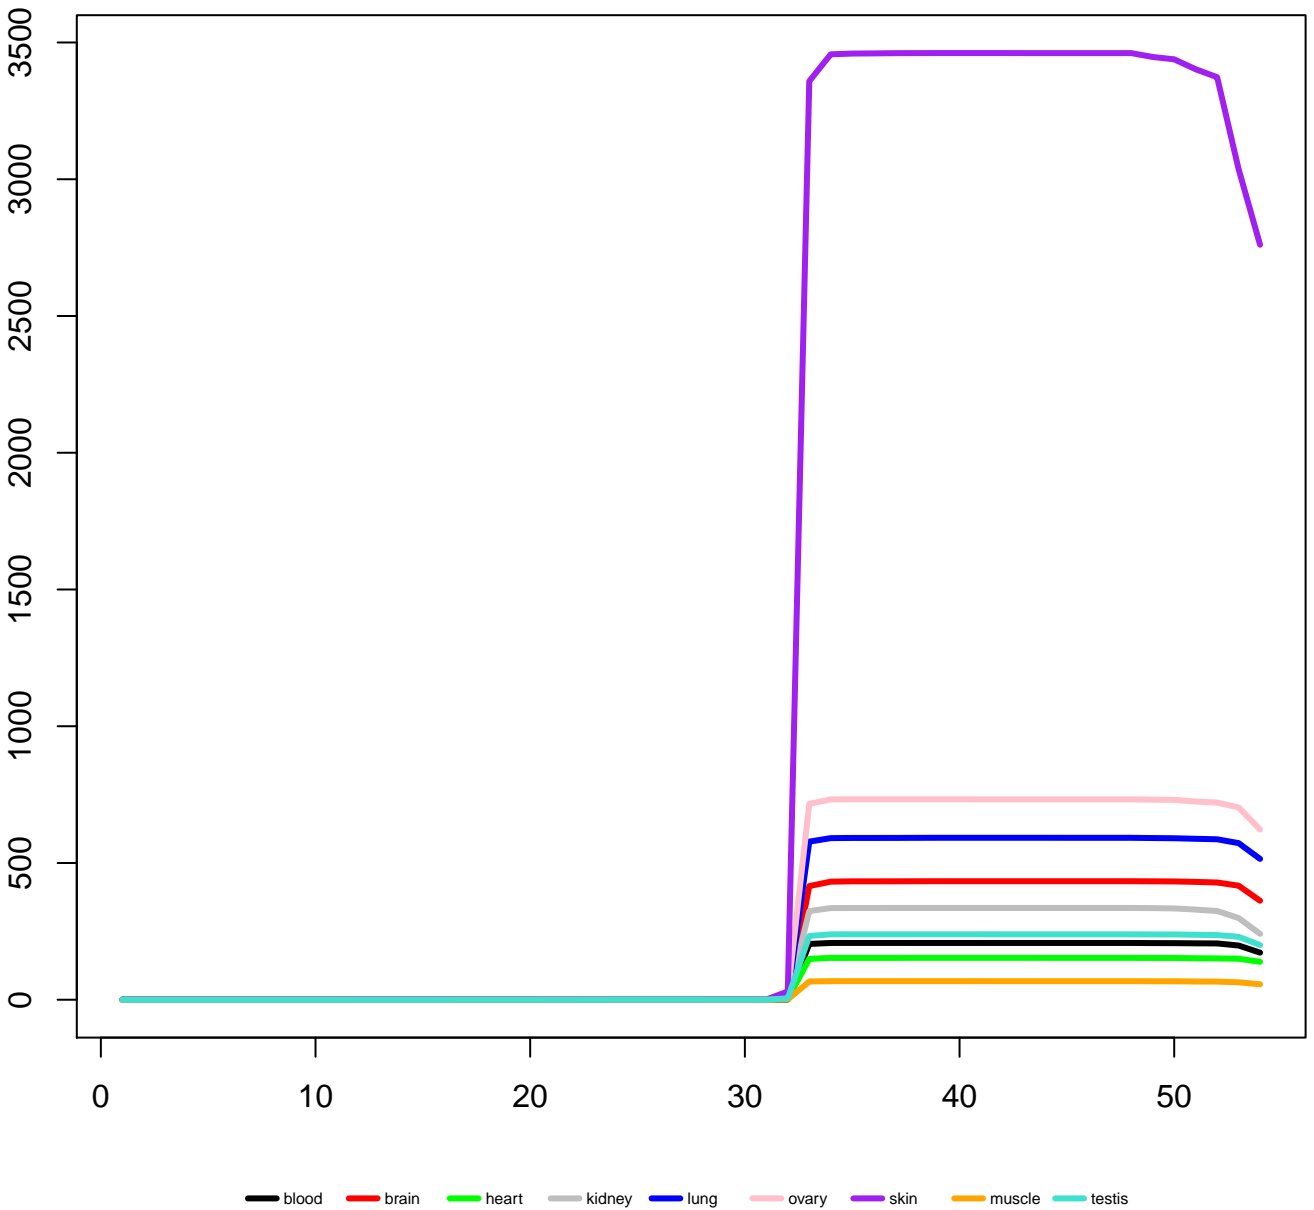

# 25\_39560796-39560869(-)\_mir-5702\_low

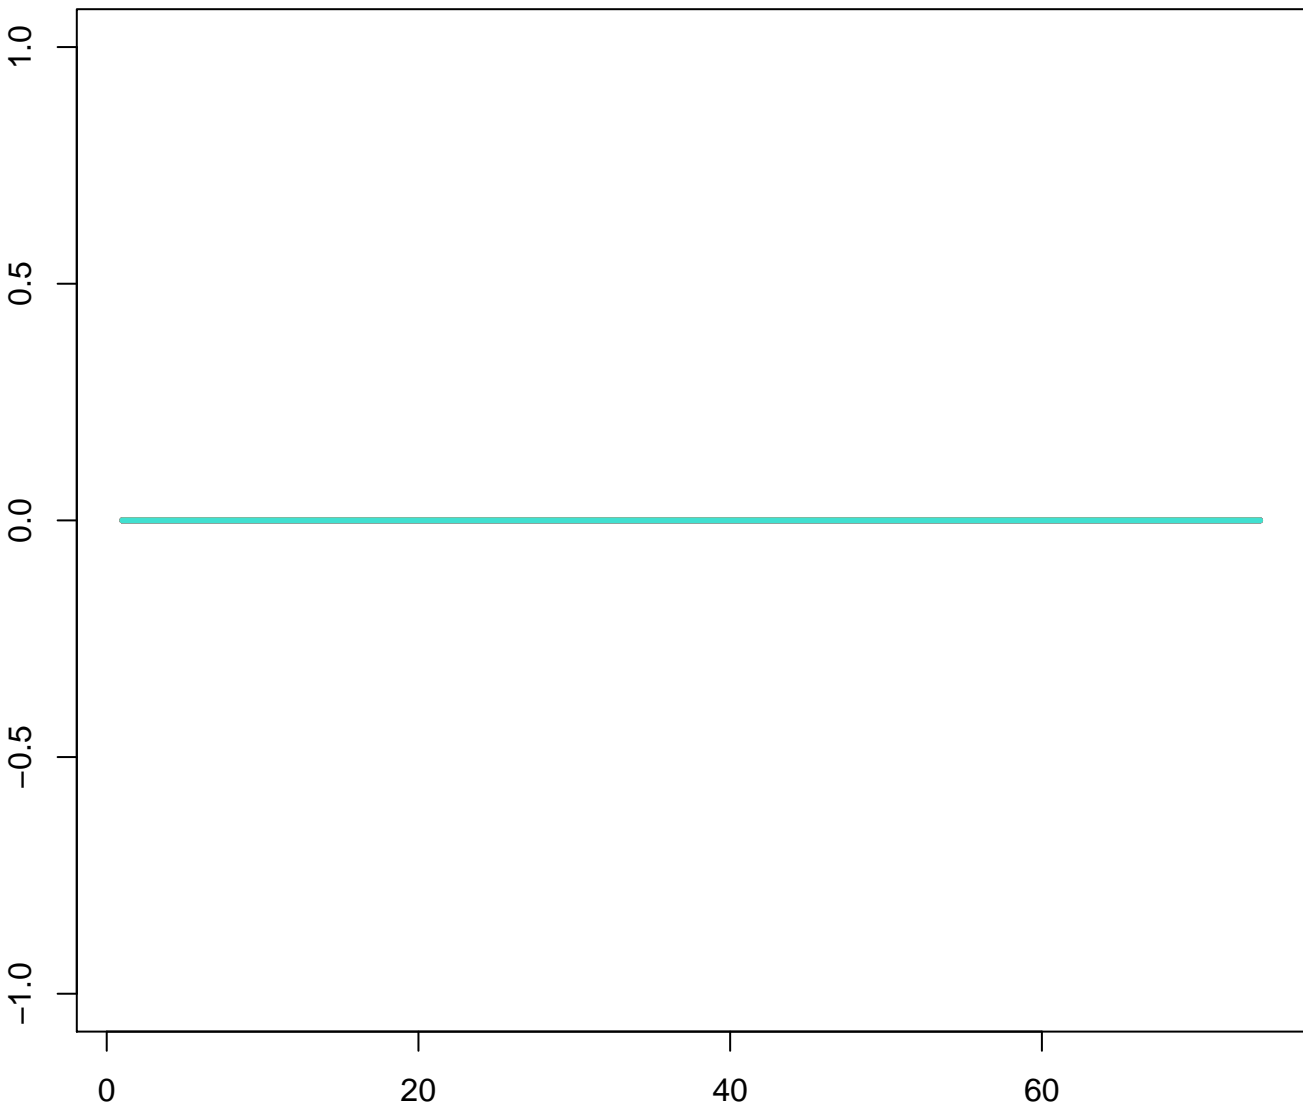

blood brain heart kidney lung ovary skin muscle testis

# 25\_43332306-43332386(-)\_mir-3535\_high

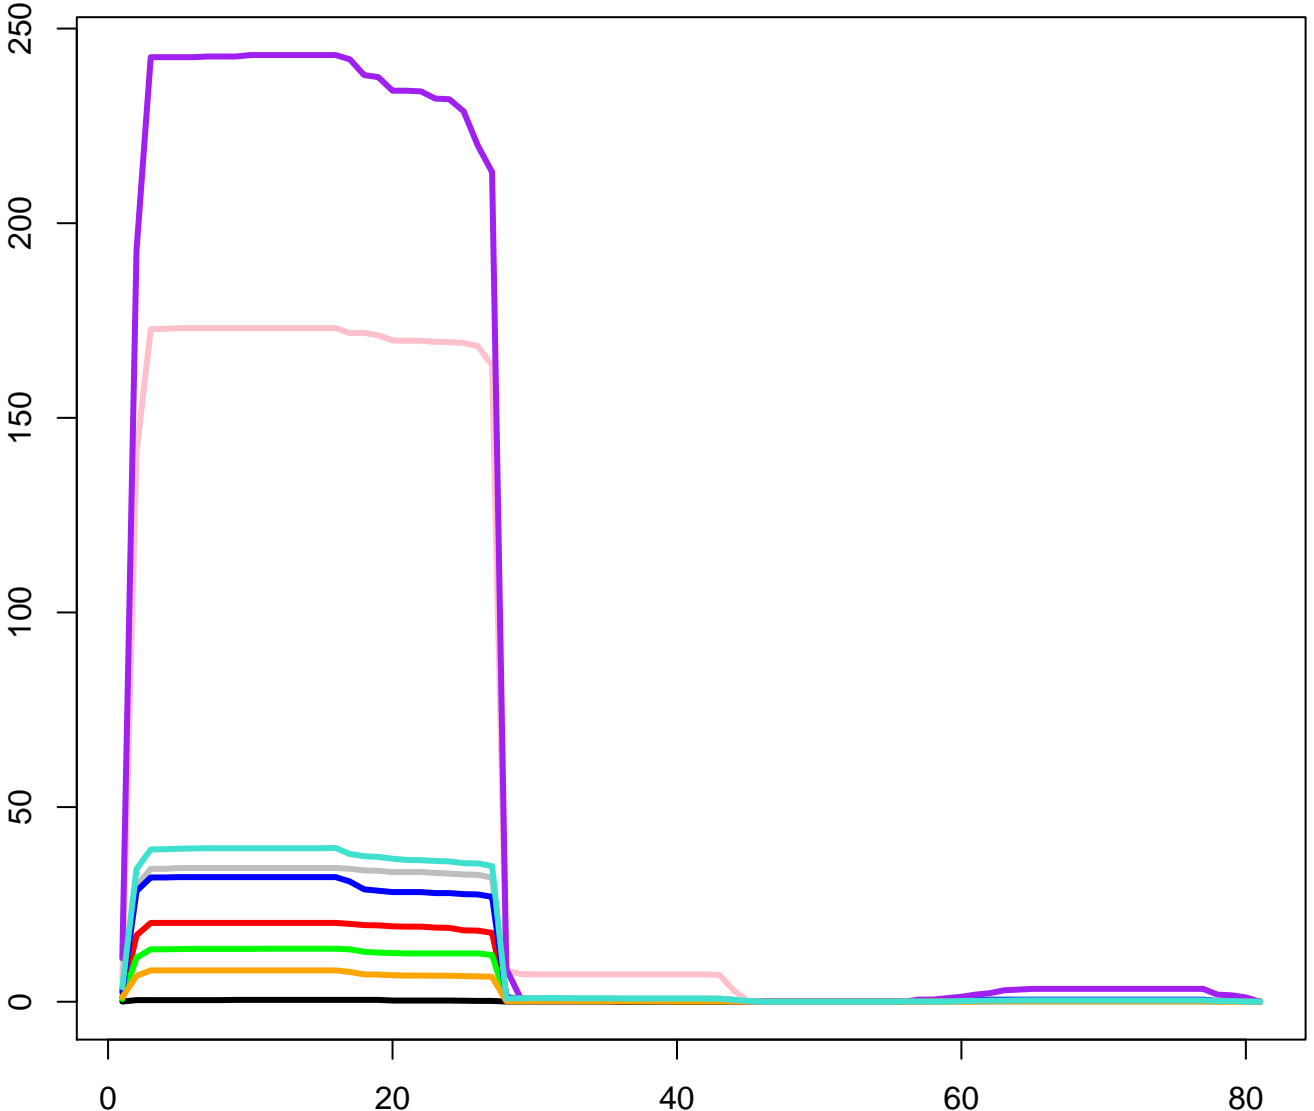

— blood — brain — heart — kidney — lung — ovary — skin — muscle — testis

# 25\_43567761-43567846(+)\_mir-1244\_low

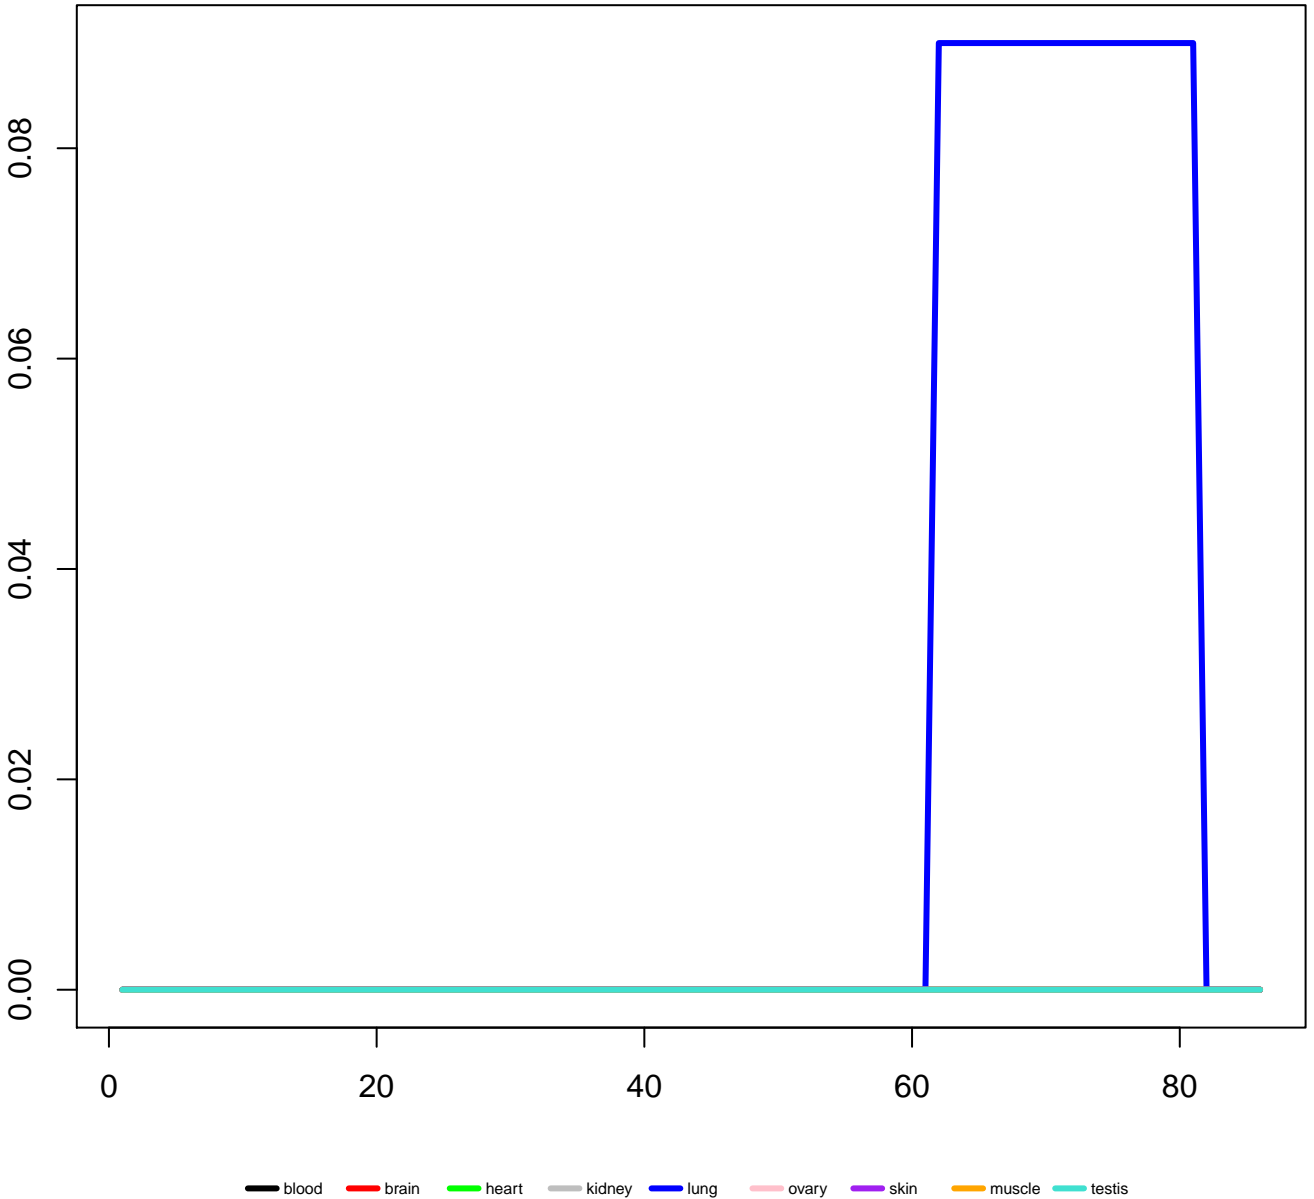

# 25\_45164925-45165069(-)\_cfa-mir-8823\_low



blood brain heart kidney lung ovary skin muscle testis

# 25\_48871813-48871925(+)\_cfa-mir-8822\_low

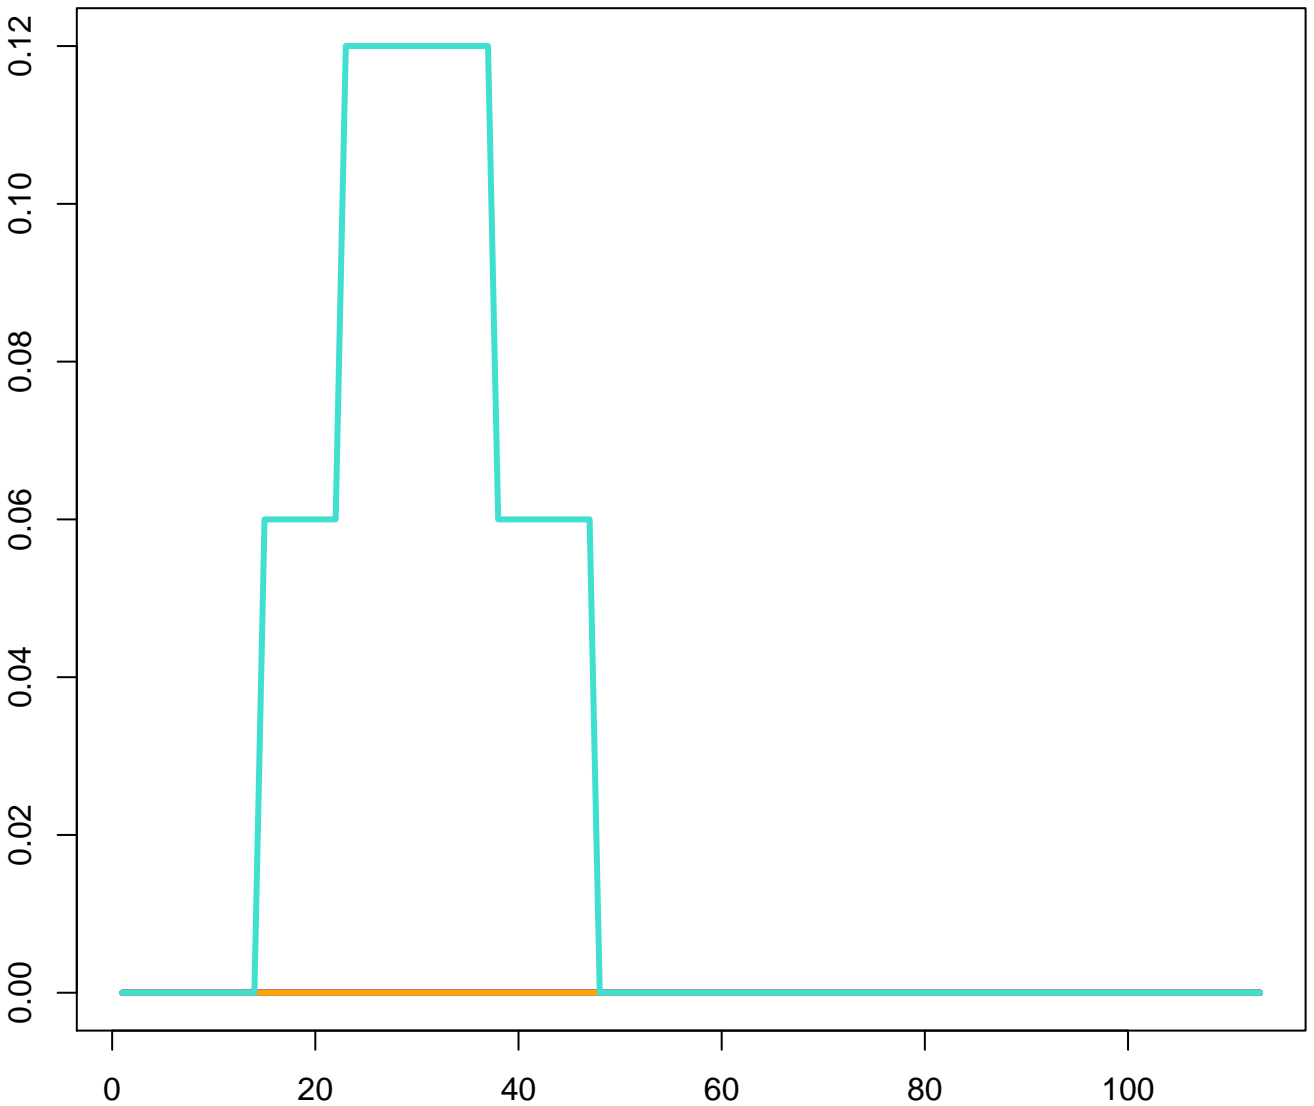

blood brain heart kidney lung ovary skin muscle testis

# 25\_50483520-50483602(+)\_cfa-mir-149\_high

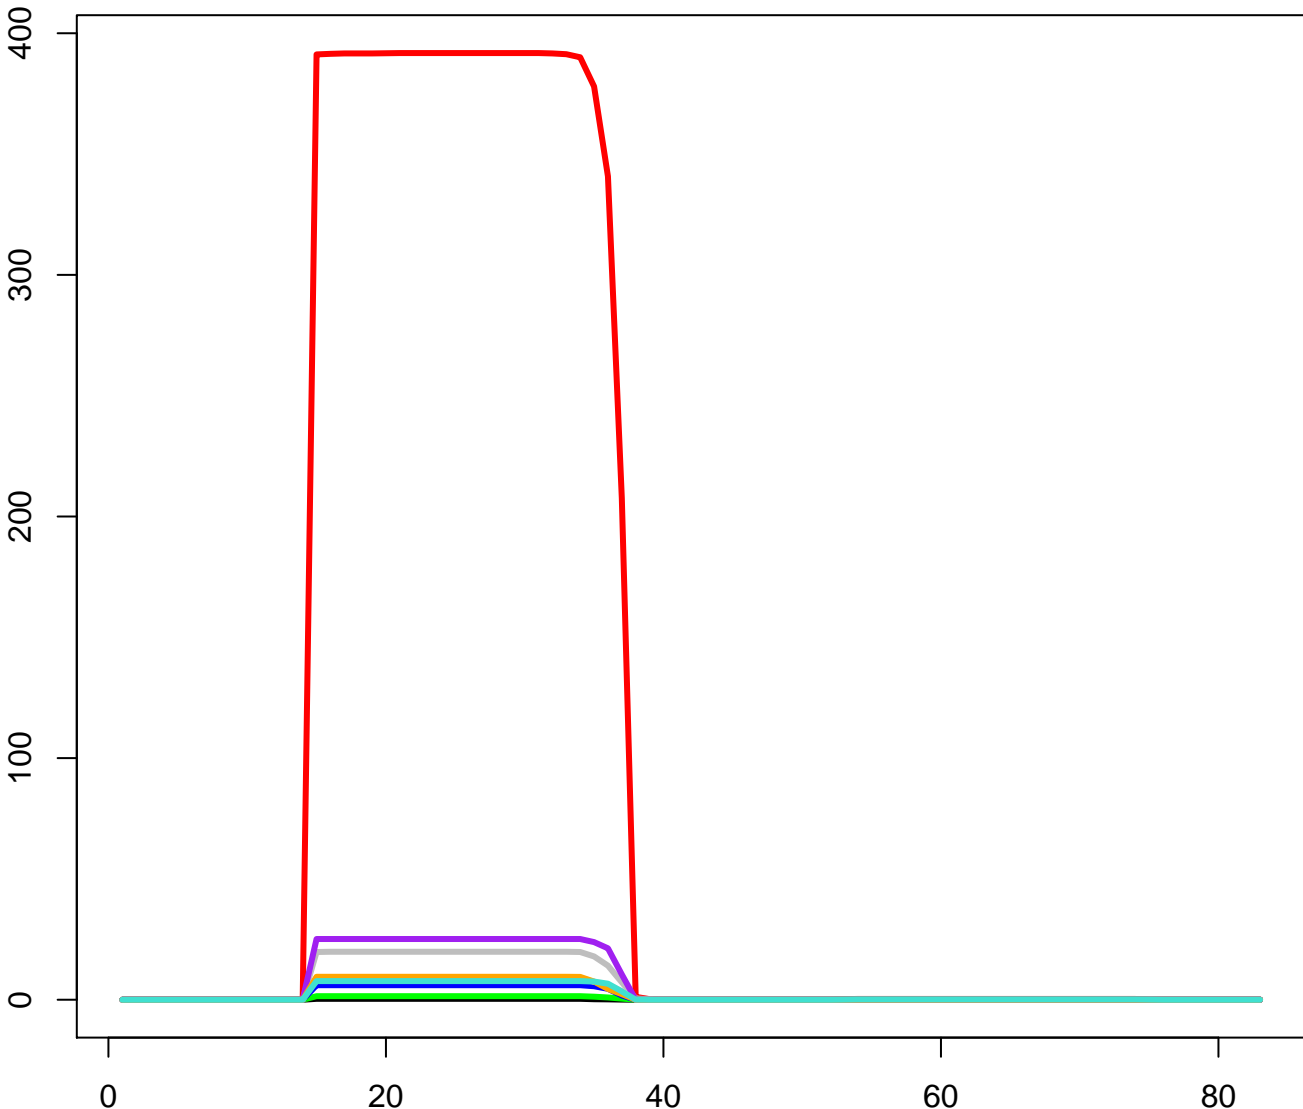

— blood — brain — heart — kidney — lung — ovary — skin — muscle — testis



# 26\_14526313-14526457(+)\_cfa-mir-8819\_low

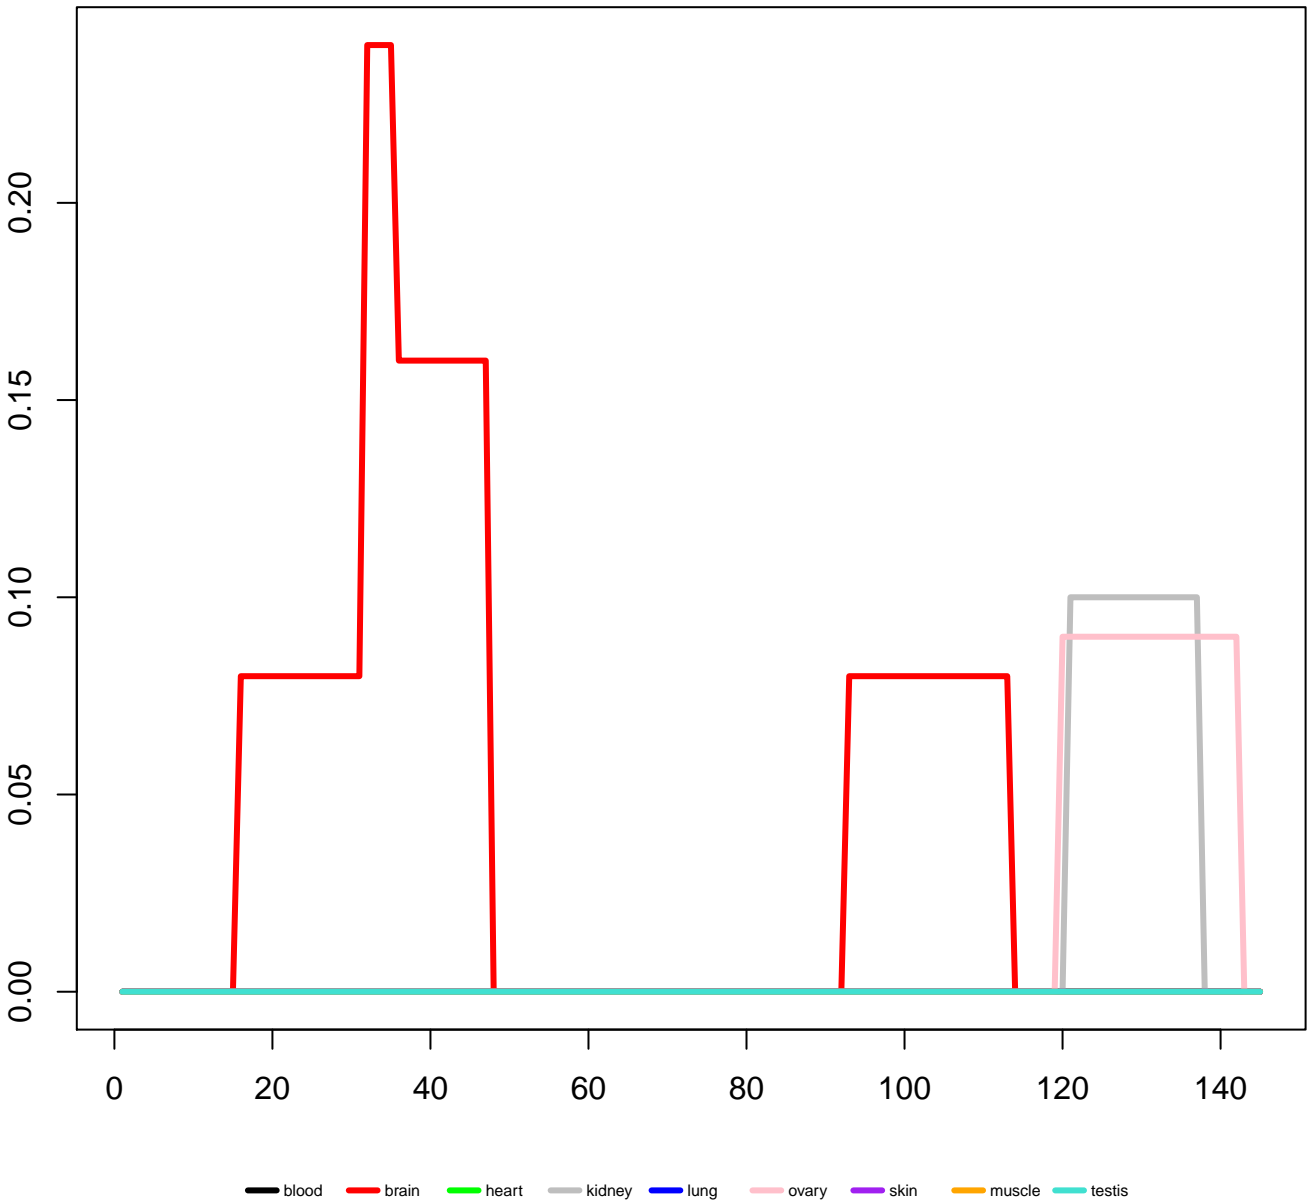



# 26\_28860341-28860485(+)\_cfa-mir-8905\_low

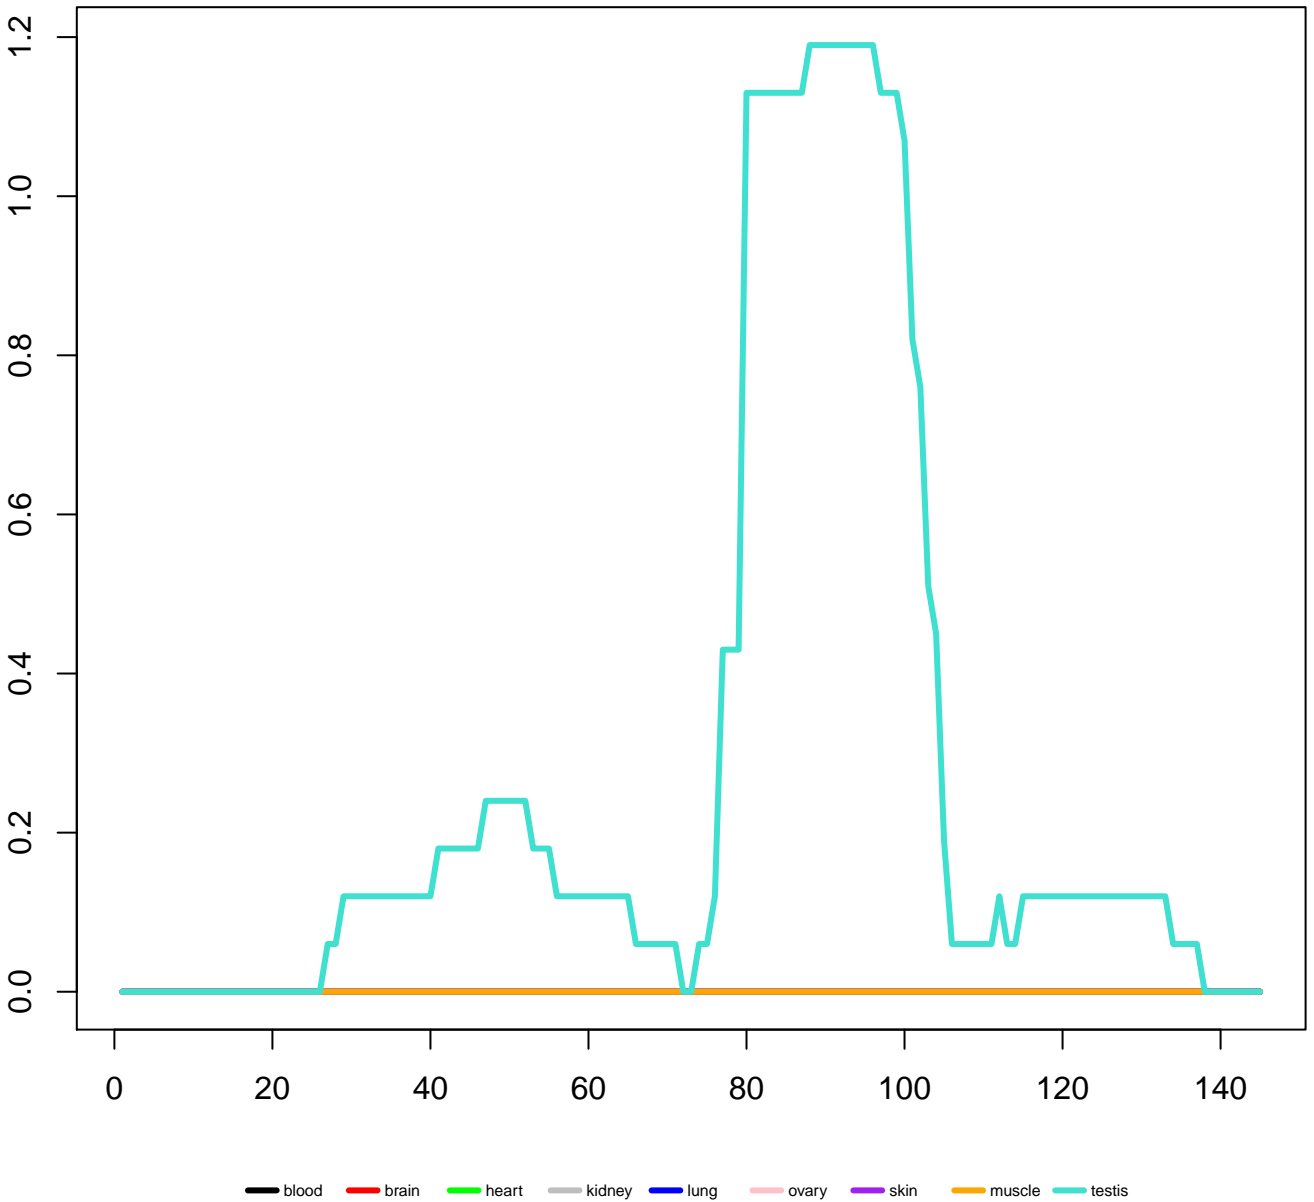



# 26\_29255971-29256061(-)\_mir-3618\_low

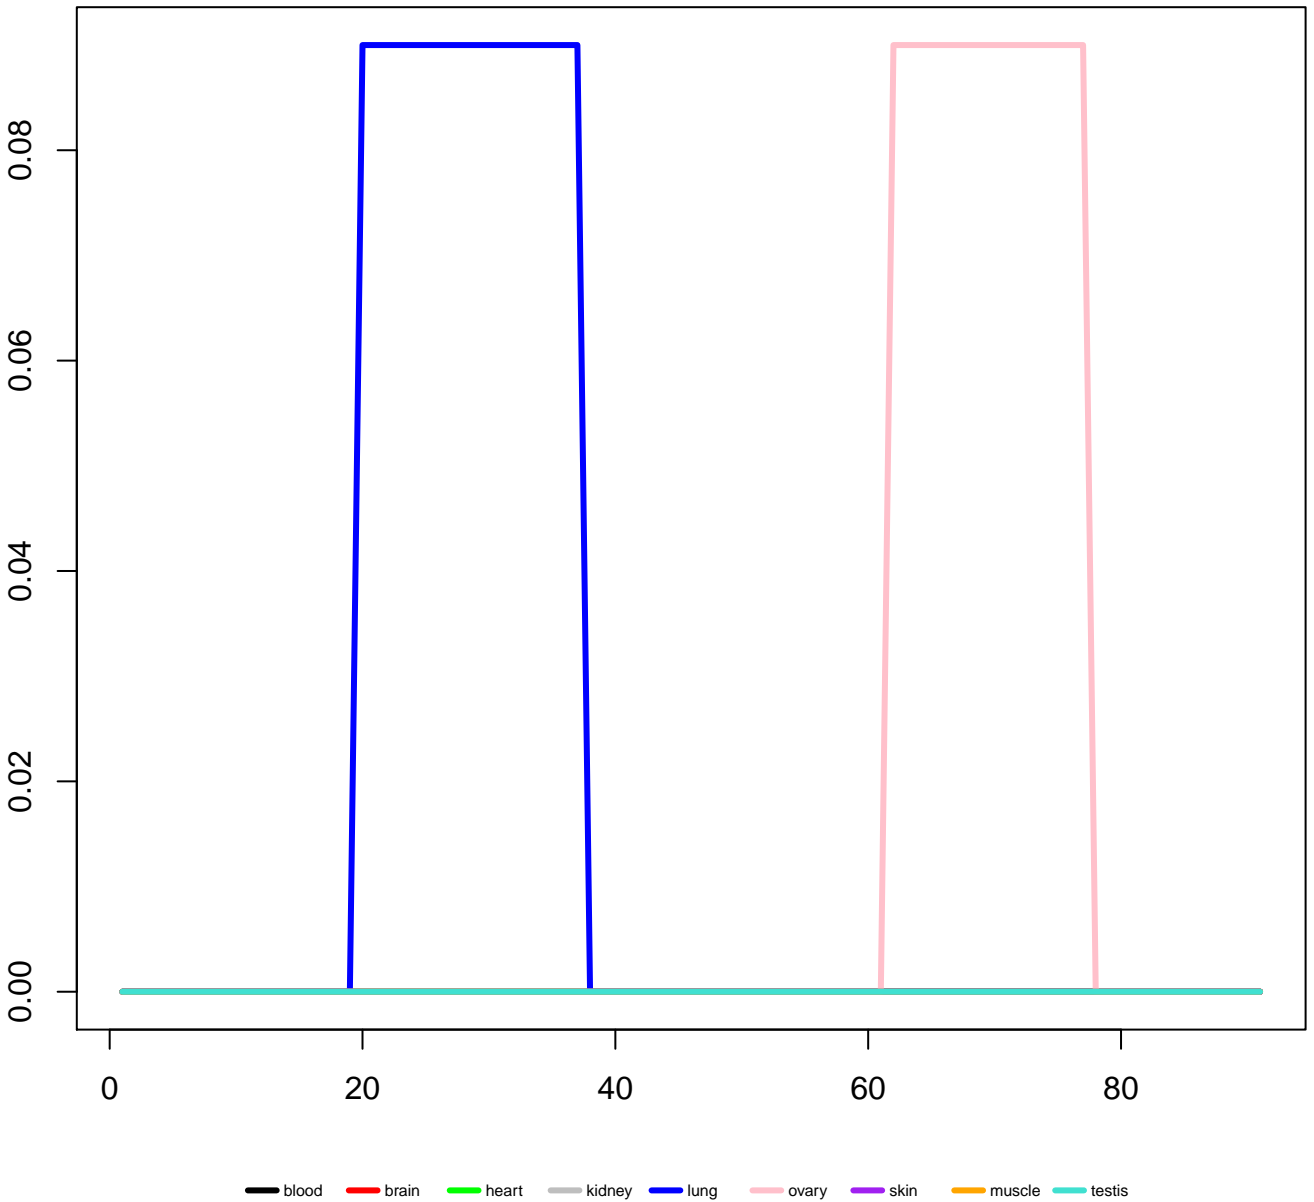



# 26\_30924103-30924178(+)\_cfa-mir-301b\_high

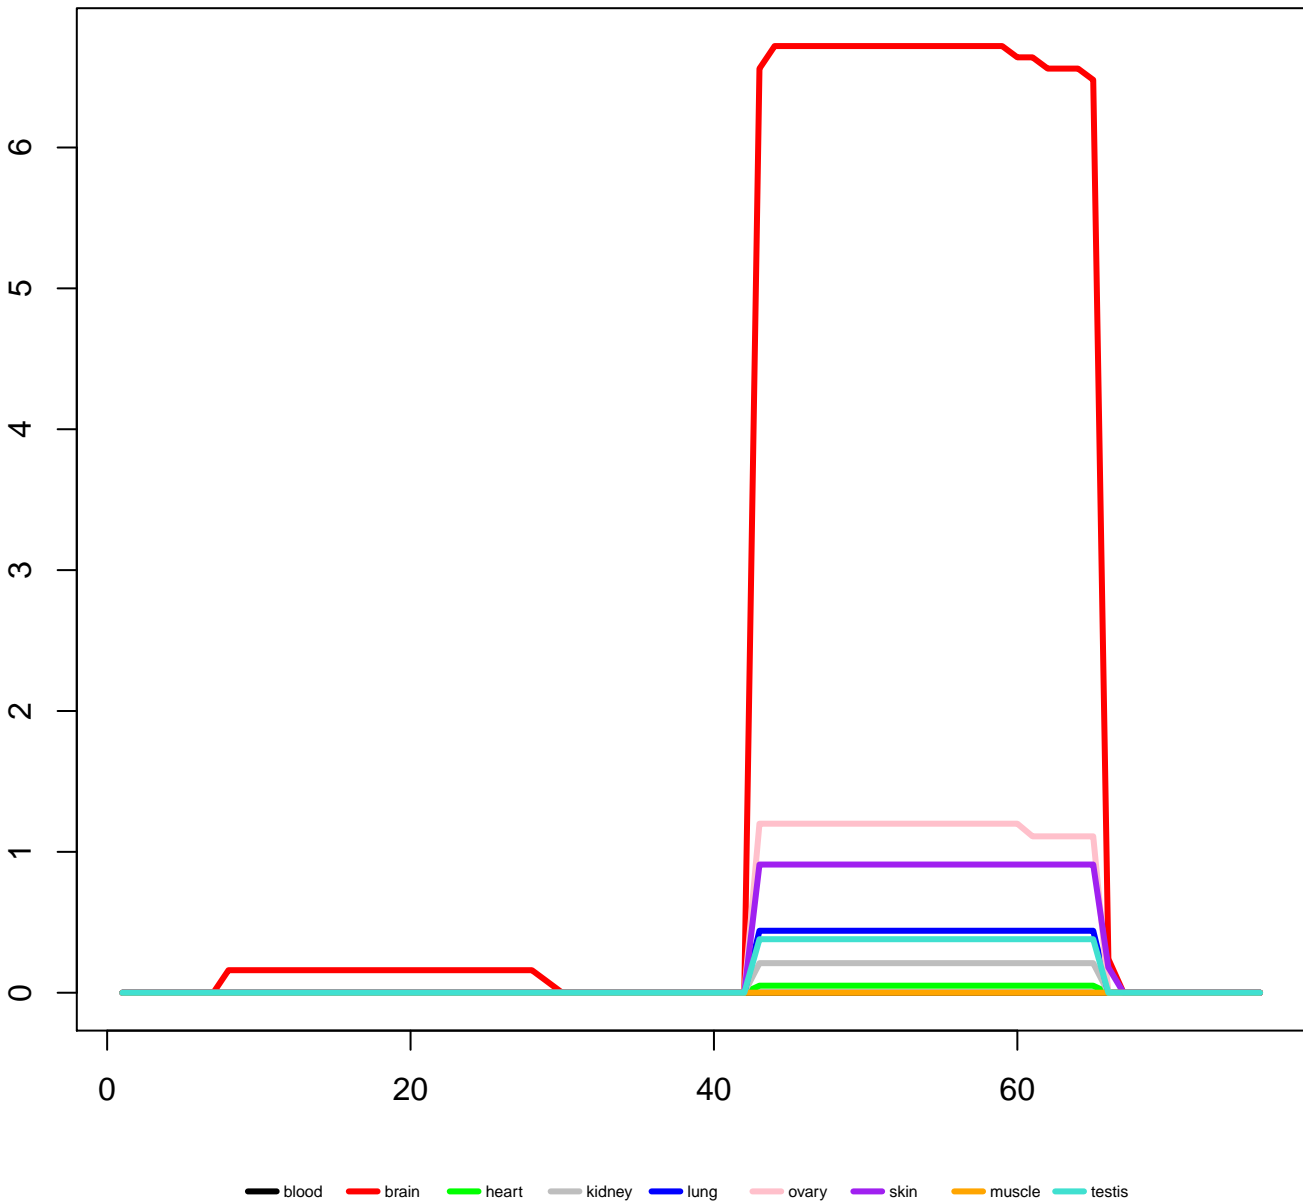

# 26\_30924432-30924491(+)\_cfa-mir-130b\_high

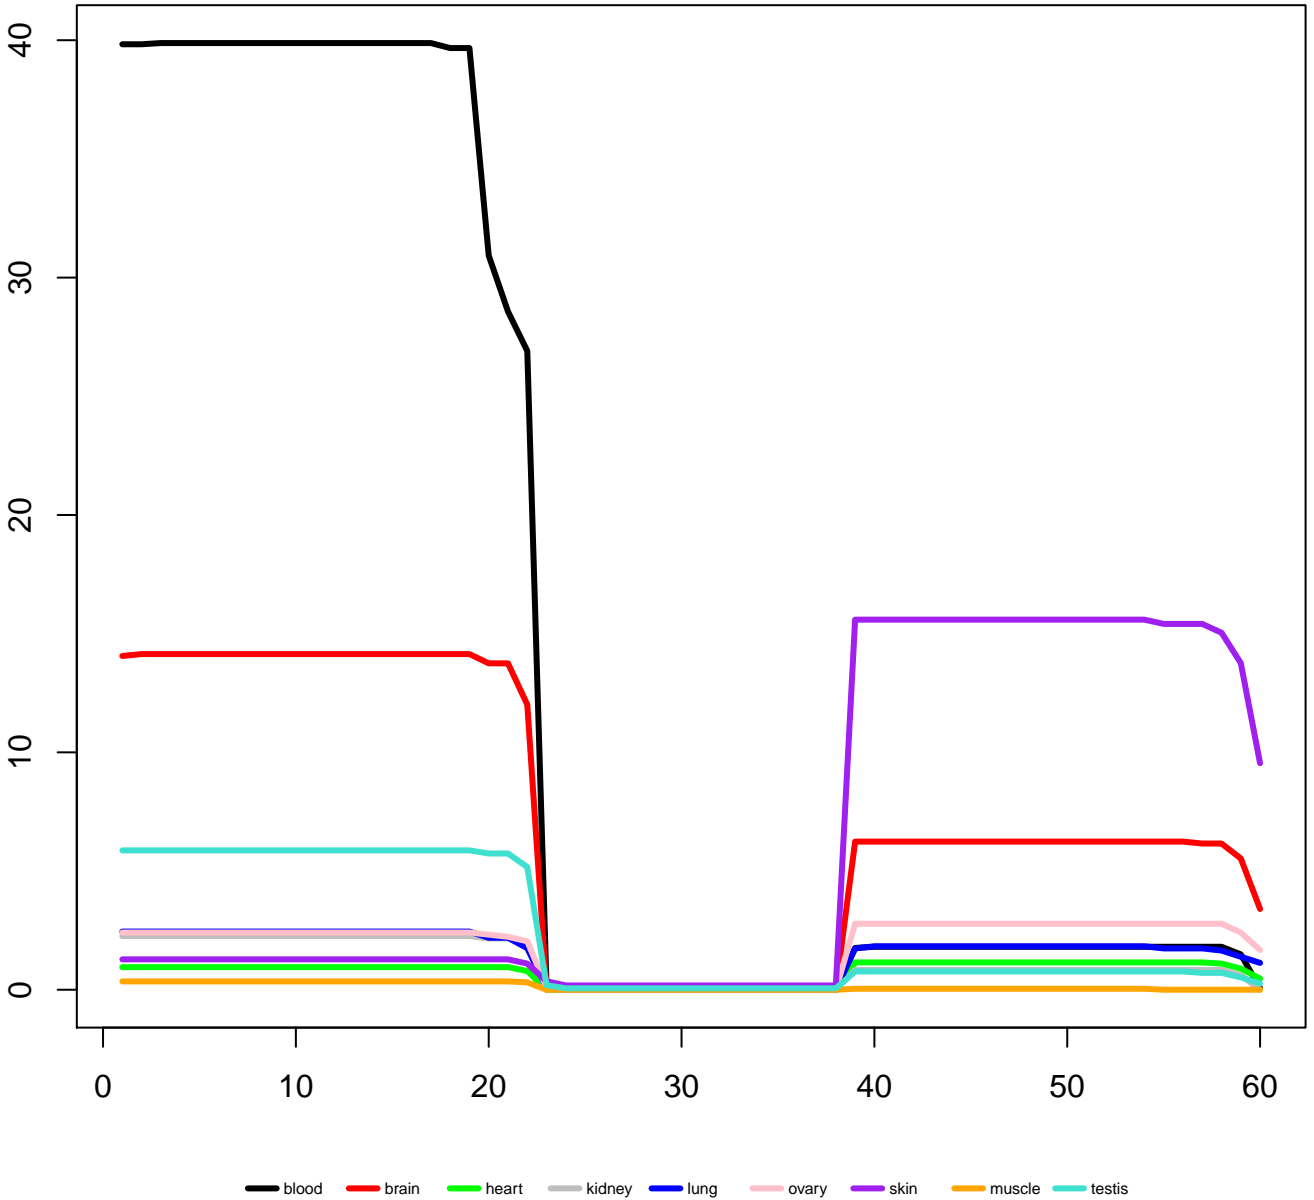





# 27\_975146-975206(-)\_cfa-mir-148b\_high

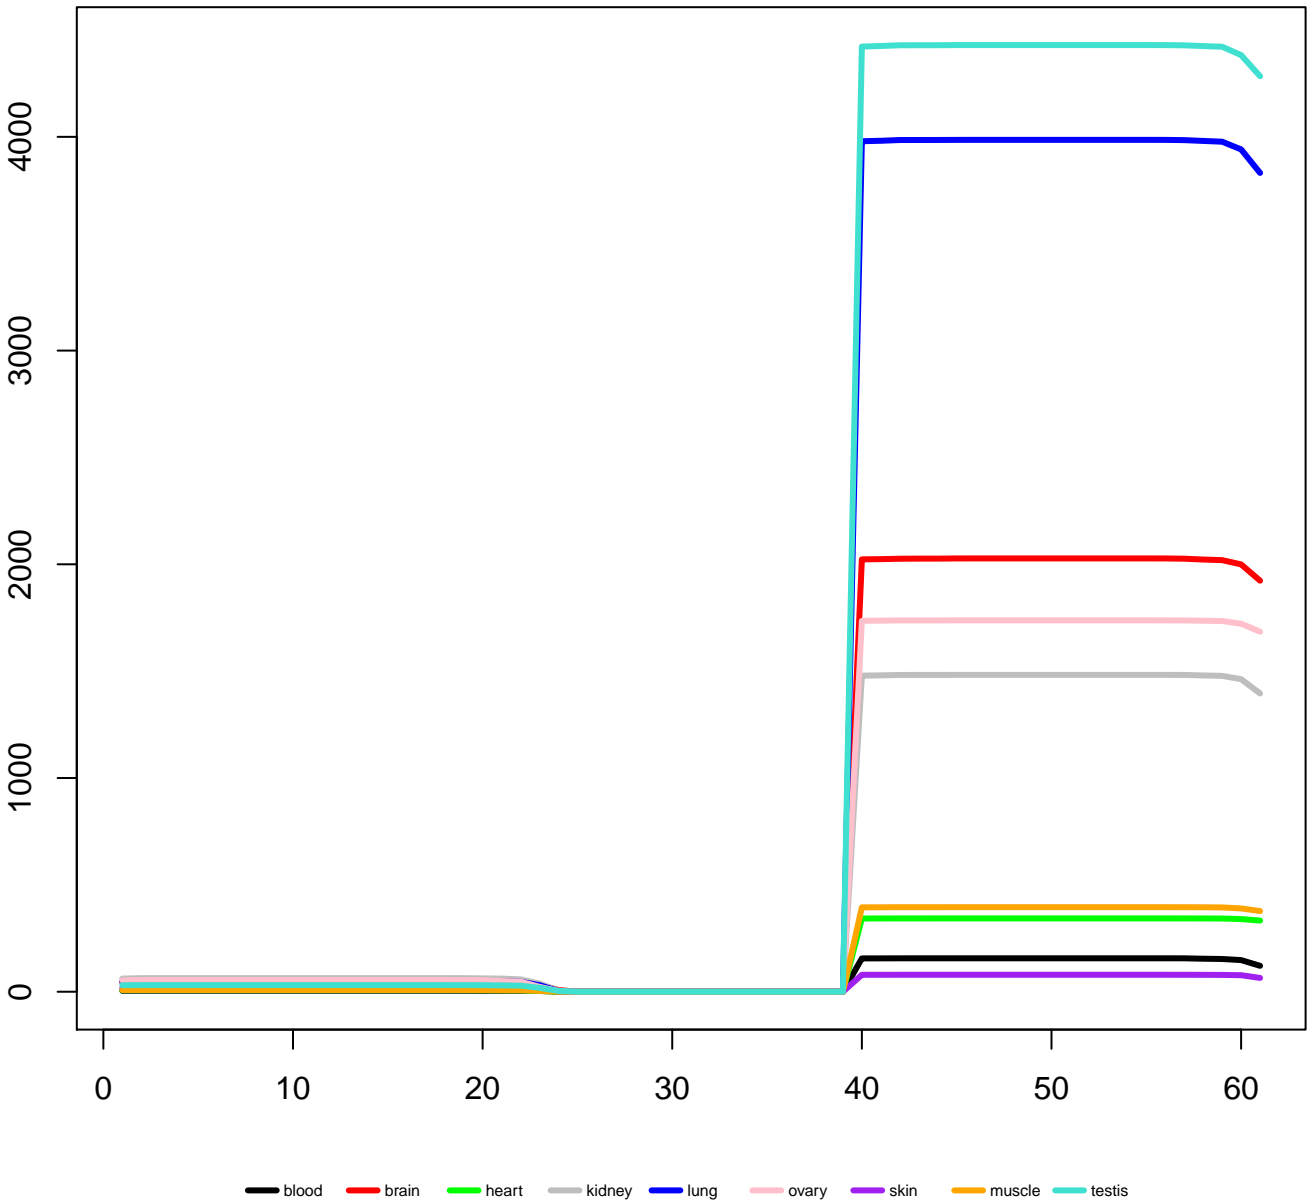

# 27\_1230447-1230531(-)\_cfa-mir-615\_high

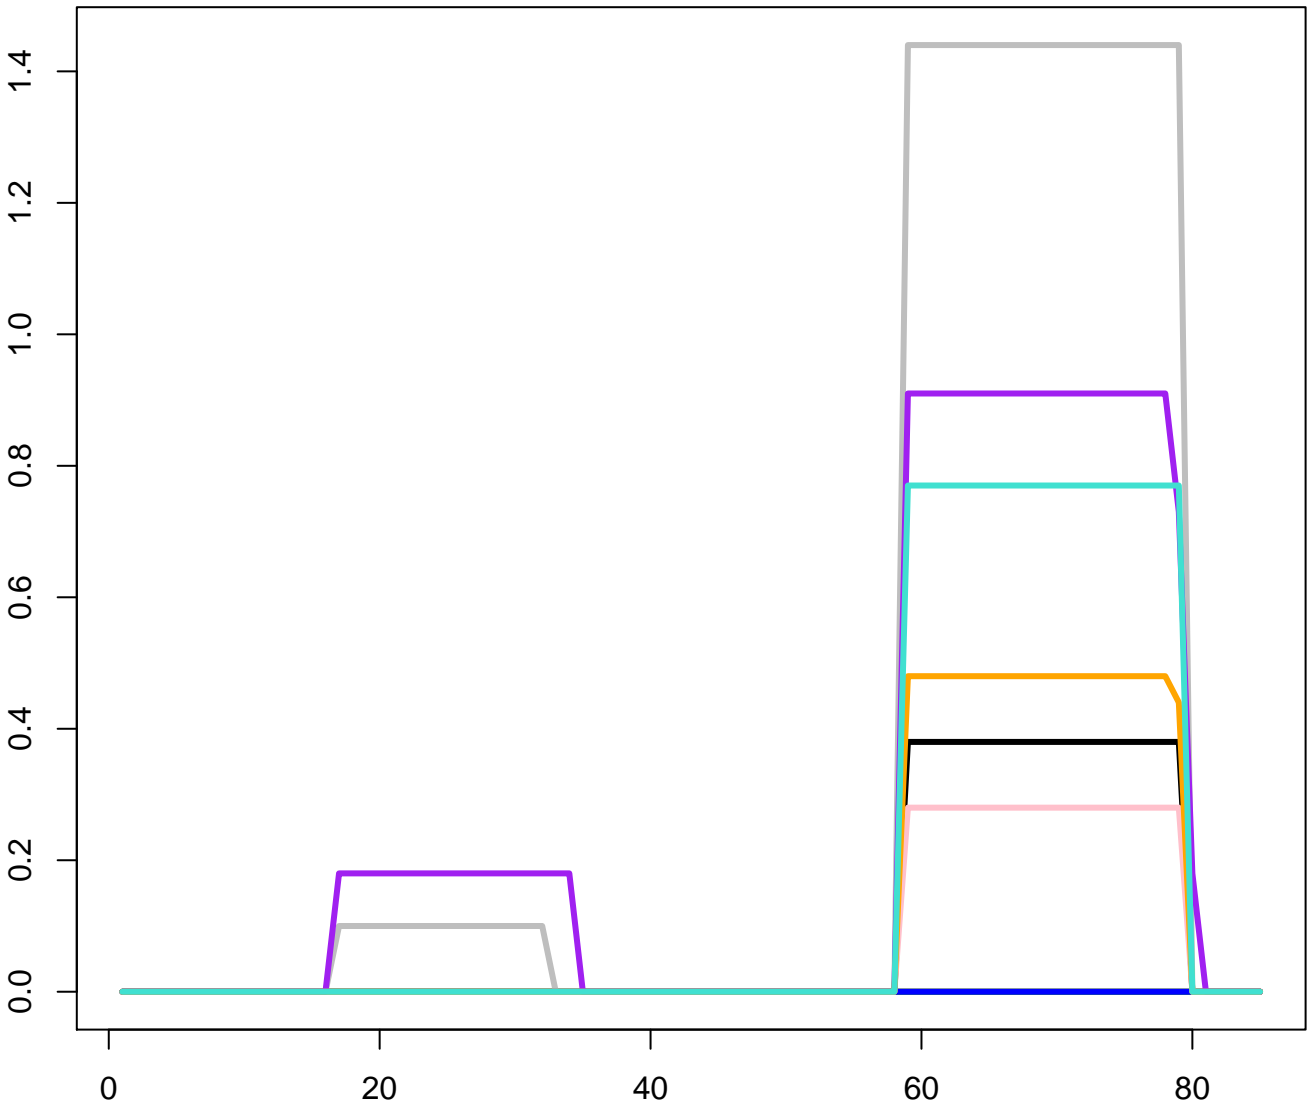

— blood — brain — heart — kidney — lung — ovary — skin — muscle — testis

# 27\_1270718-1270776(-)\_cfa-mir-196a-2\_high

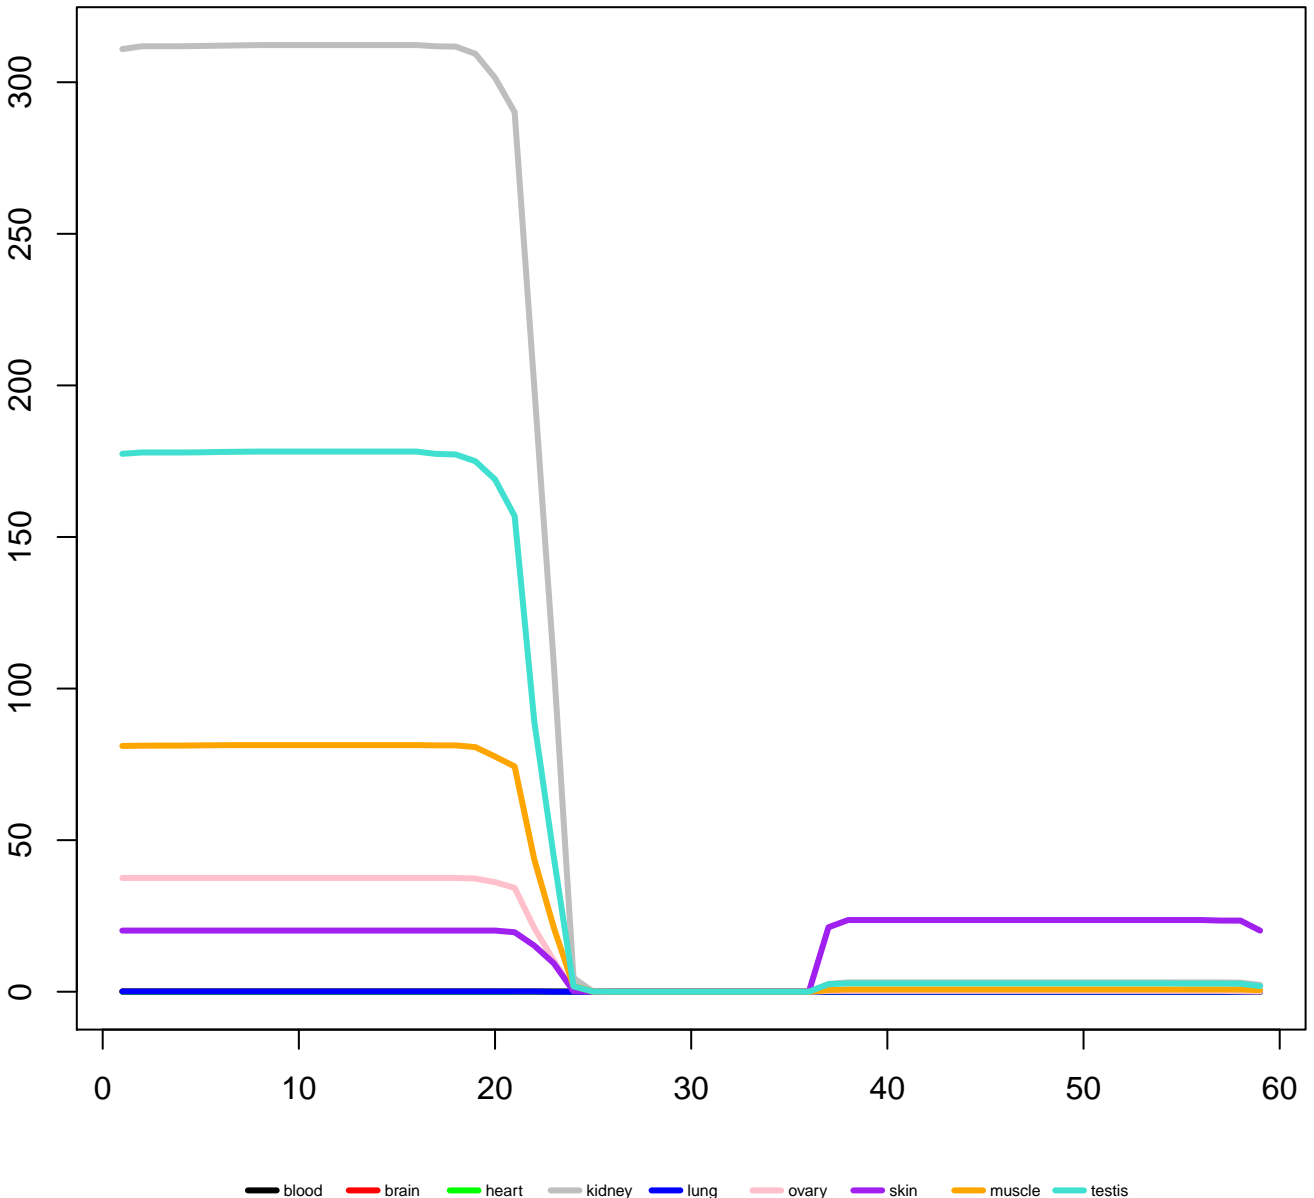

# 27\_2342884-2342960(-)\_mir-9321\_low

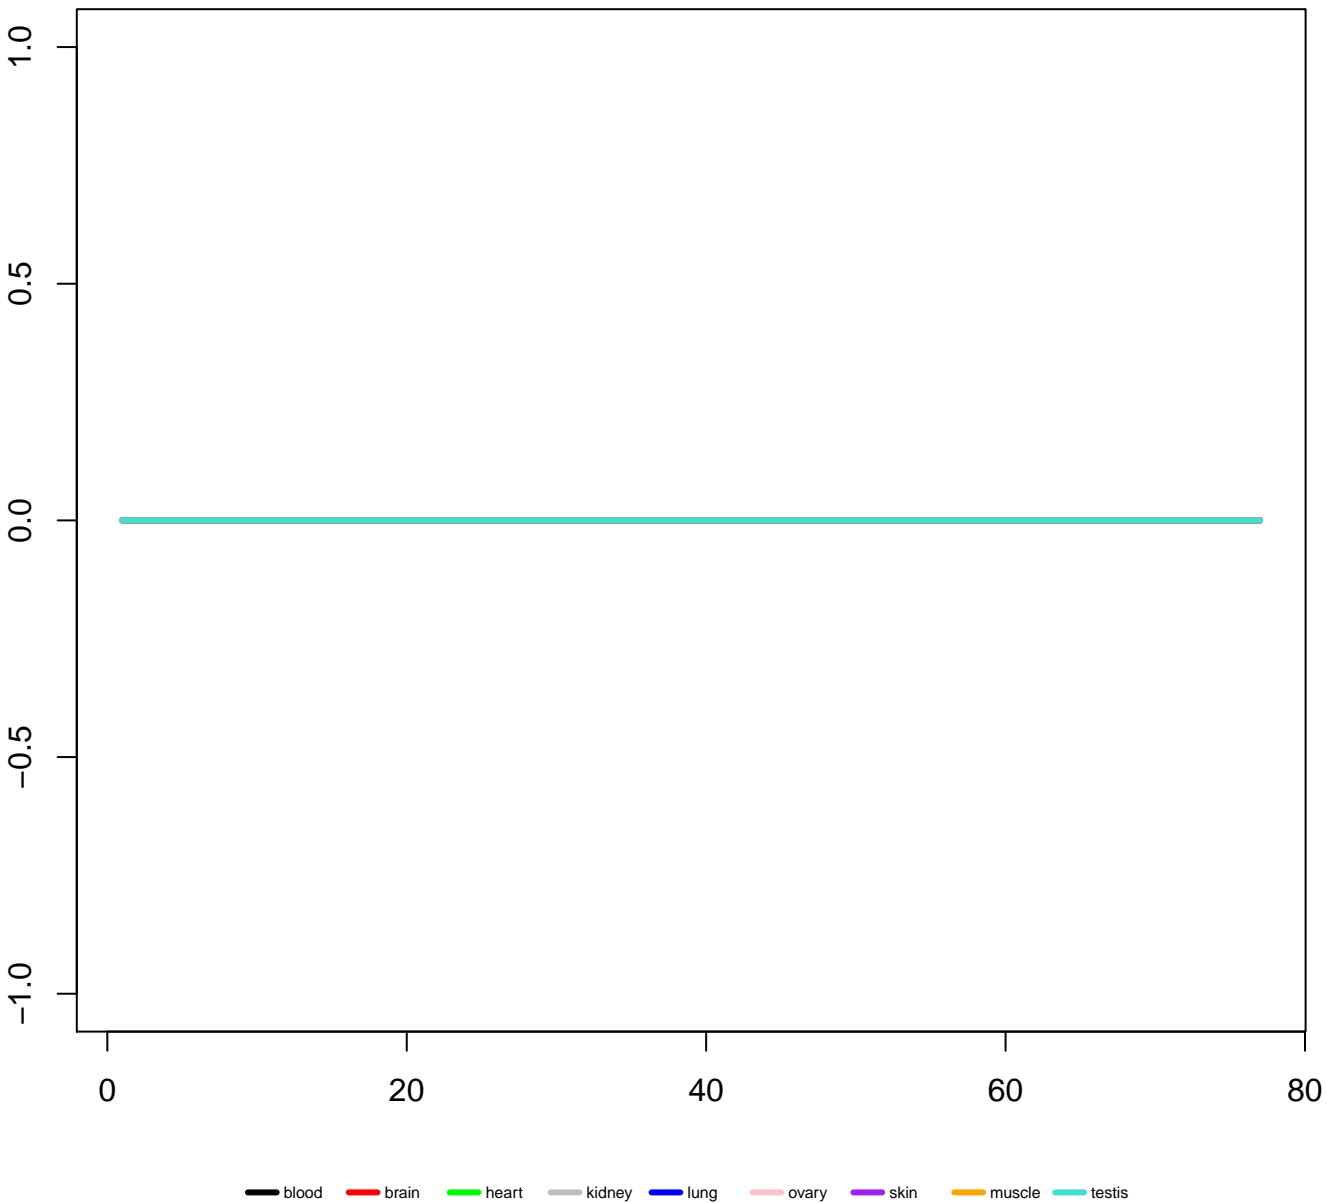

# 27\_38081668-38081753(-)\_cfa-mir-141\_high

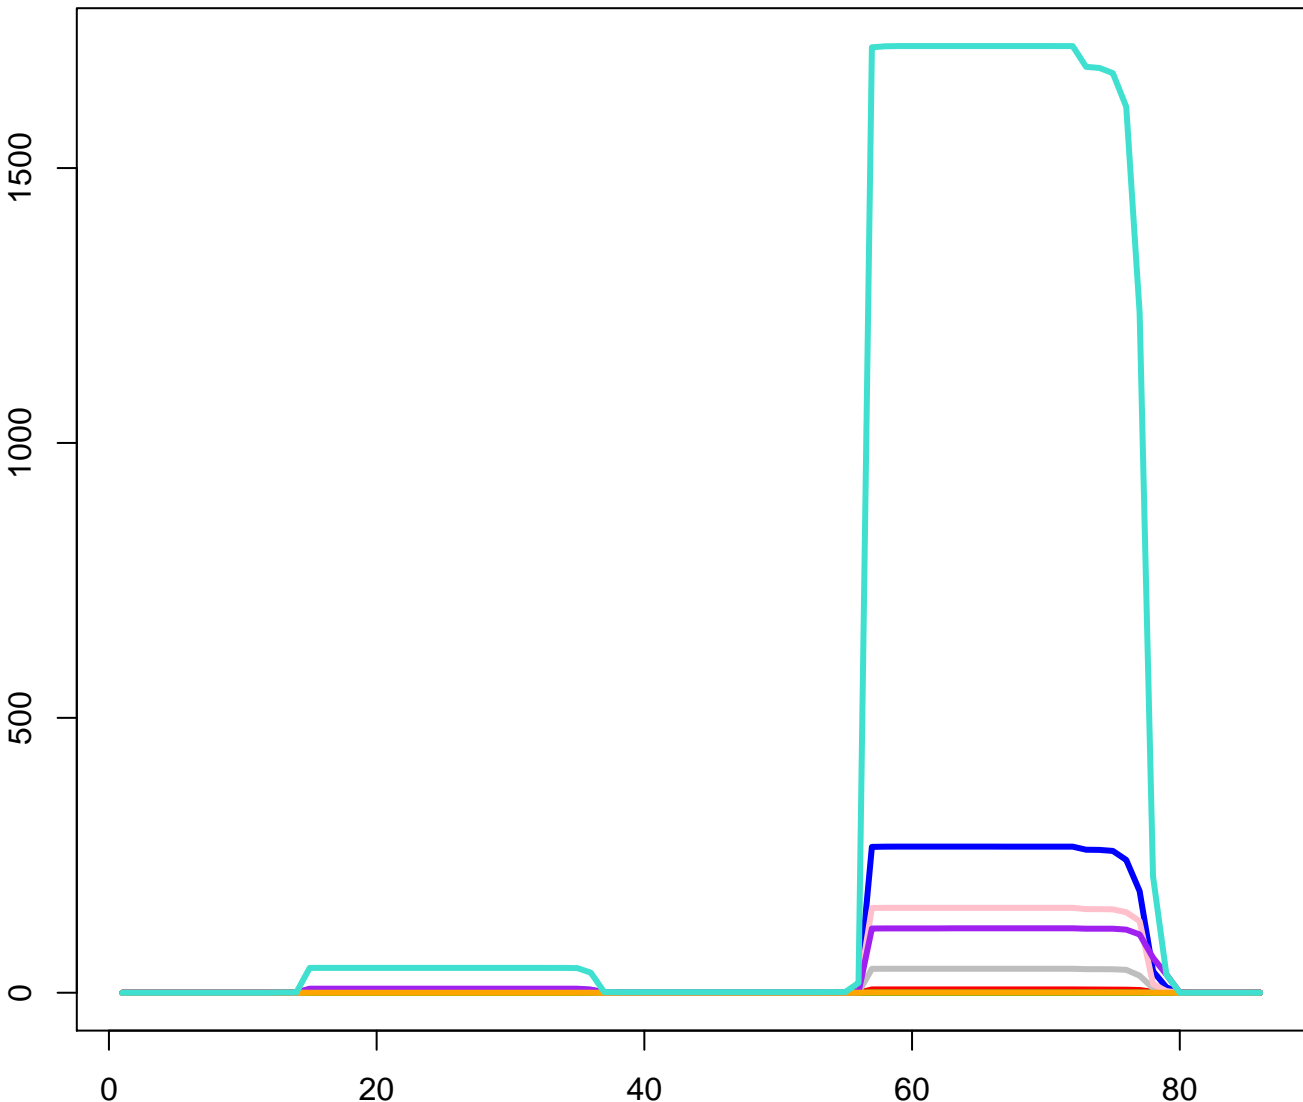

Legend: blood (black), brain (red), heart (green), kidney (grey), lung (blue), ovary (pink), skin (purple), muscle (orange), testis (cyan)

# 27\_38082097-38082159(-)\_cfa-mir-200c\_high

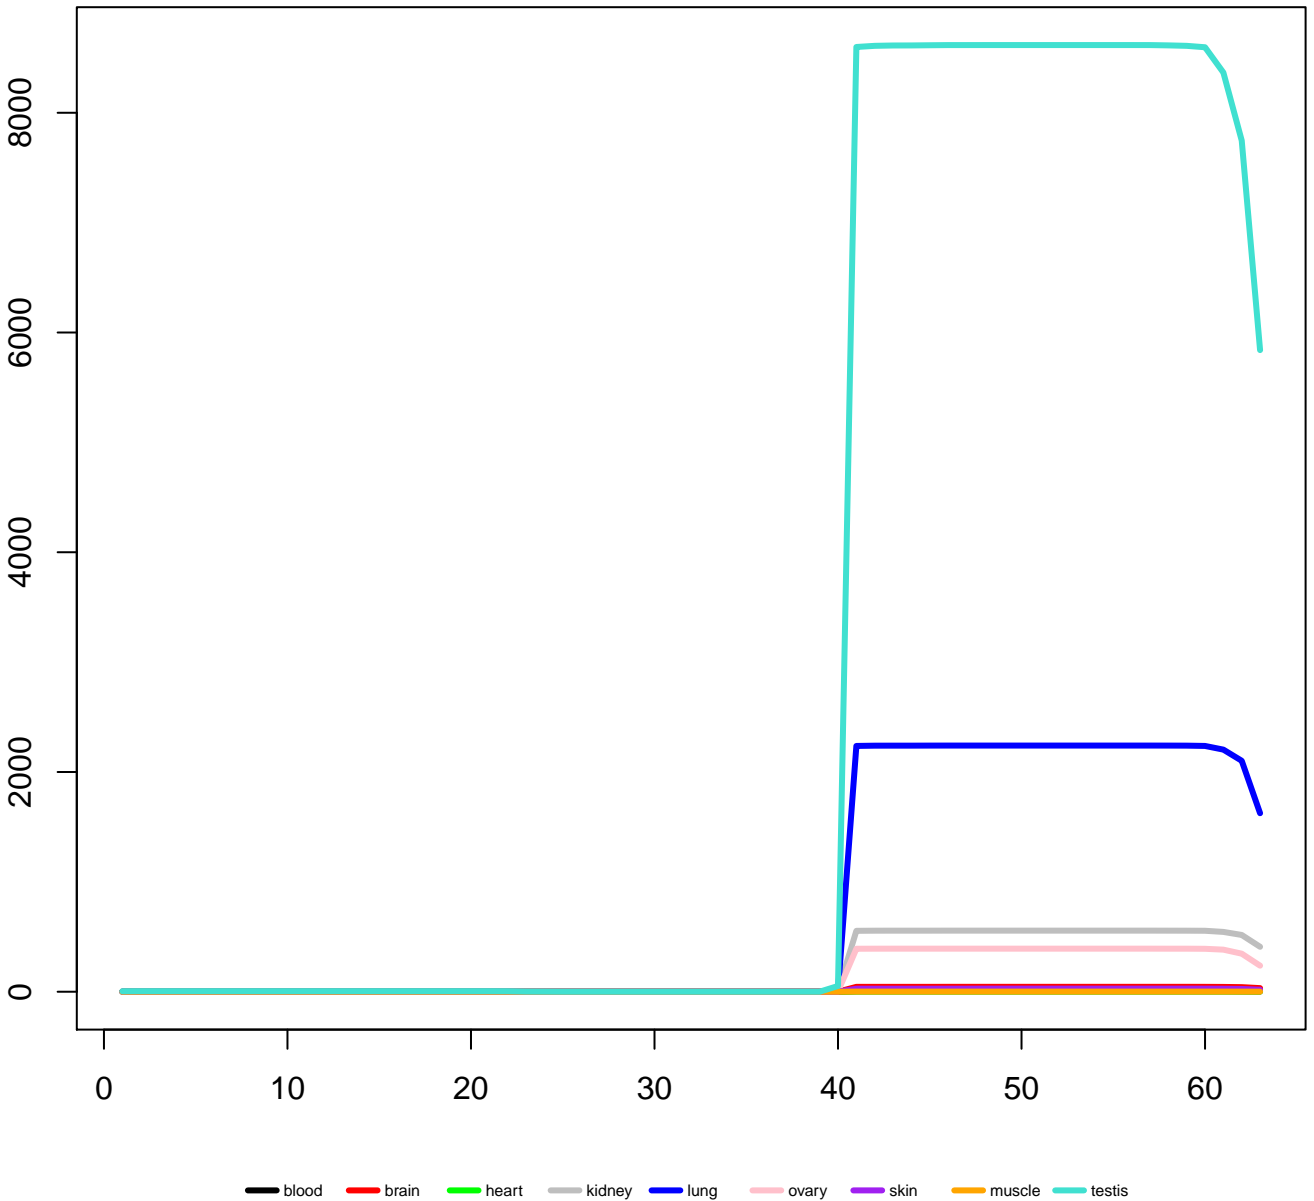

# 28\_4484653-4484710(-)\_cfa-mir-107\_high

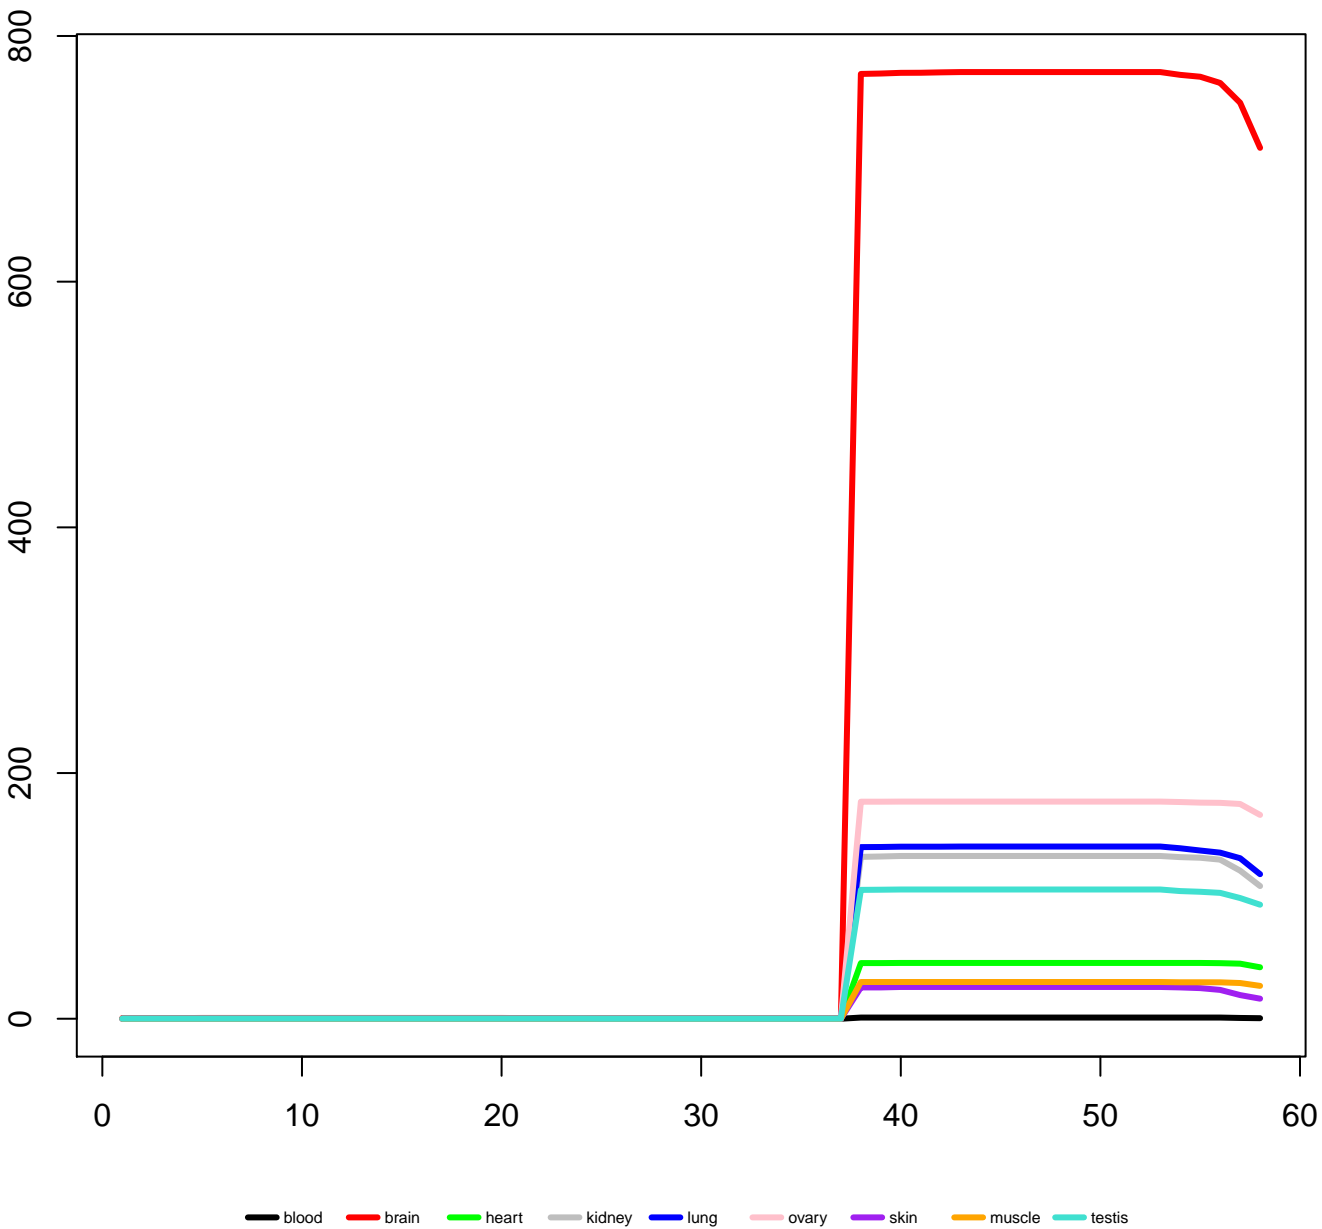



# 28\_4705462-4705592(+)\_cfa-mir-8815-1\_low

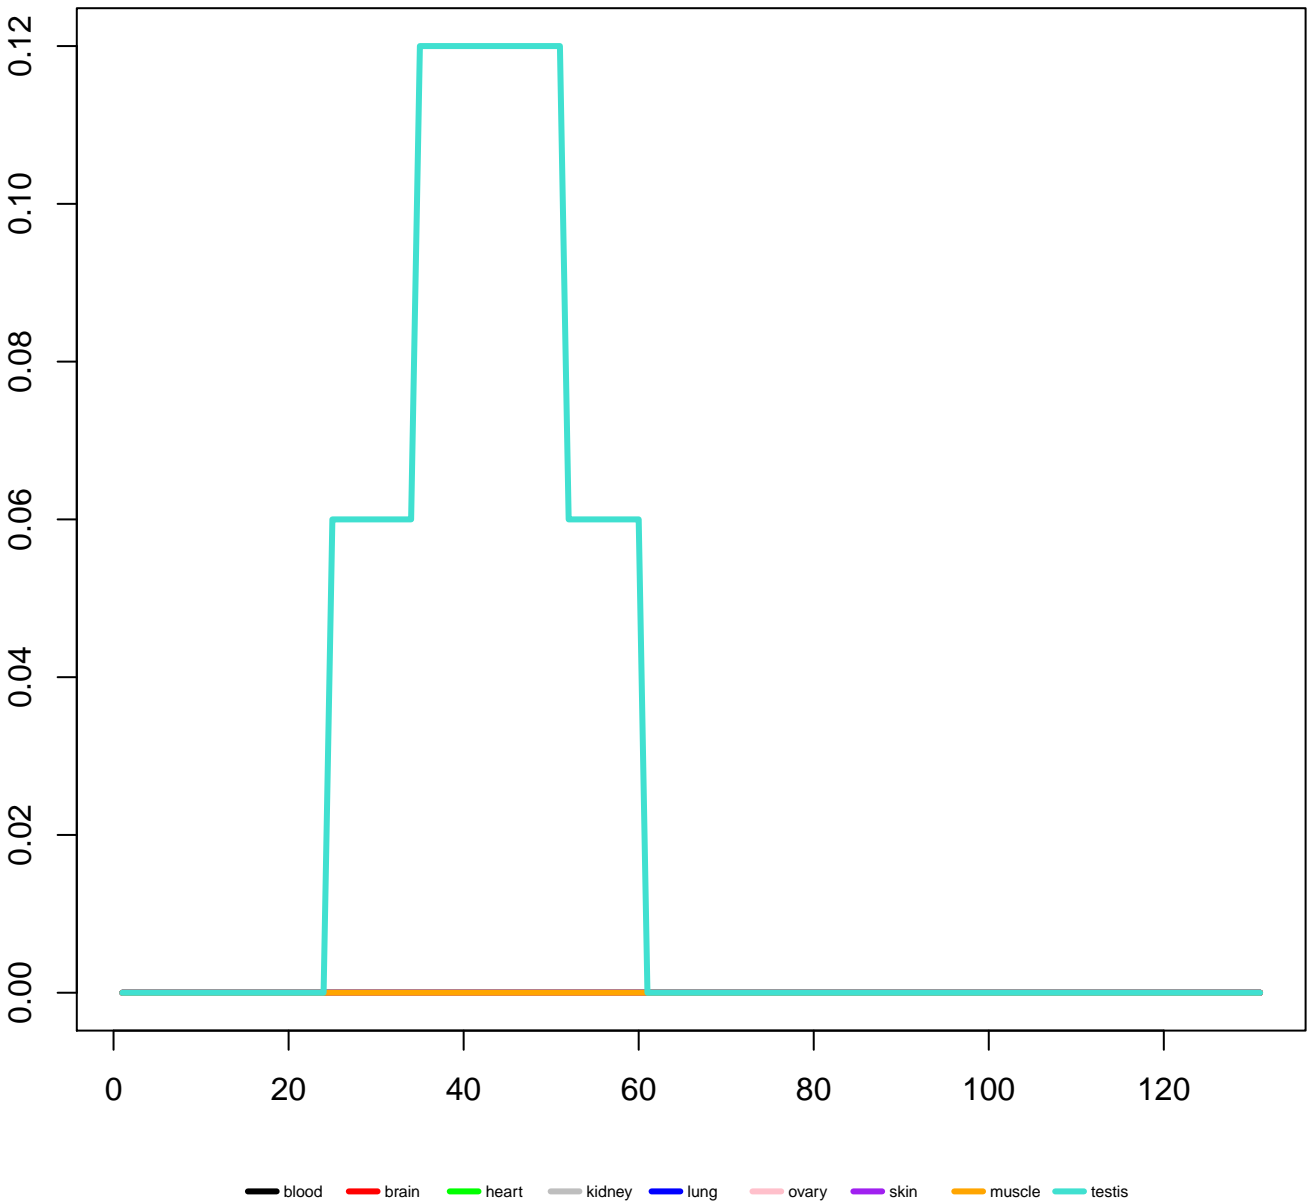

# 28\_6819312-6819442(-)\_cfa-mir-8815-2\_low

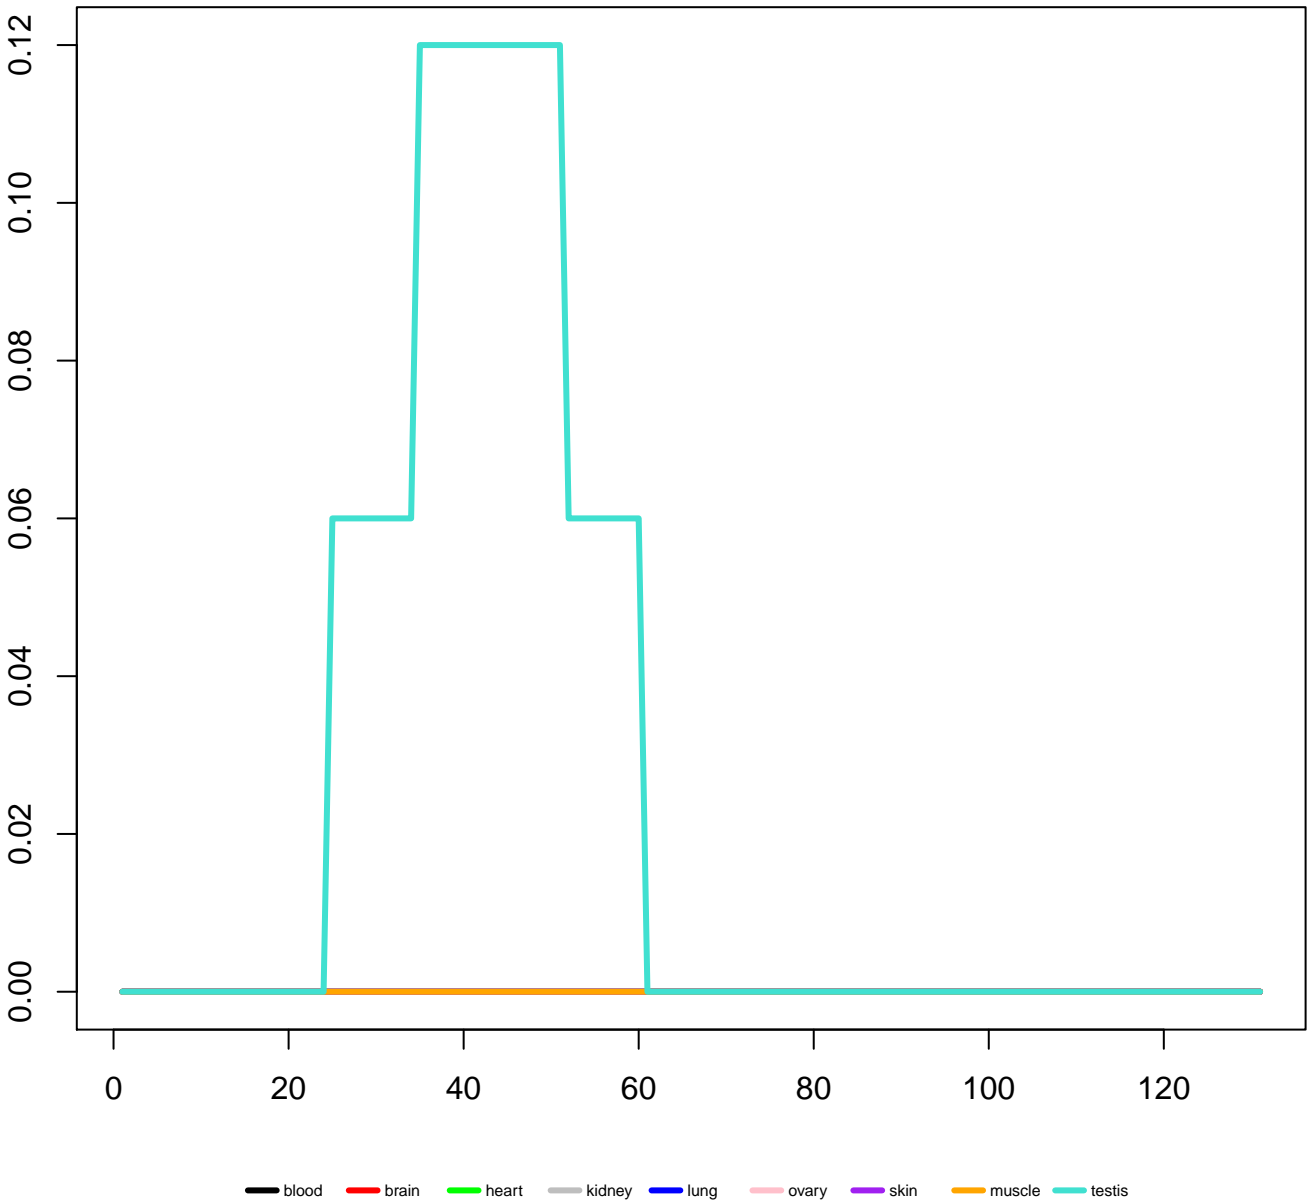



# 28\_11528123-11528217(-)\_mir-1287\_low

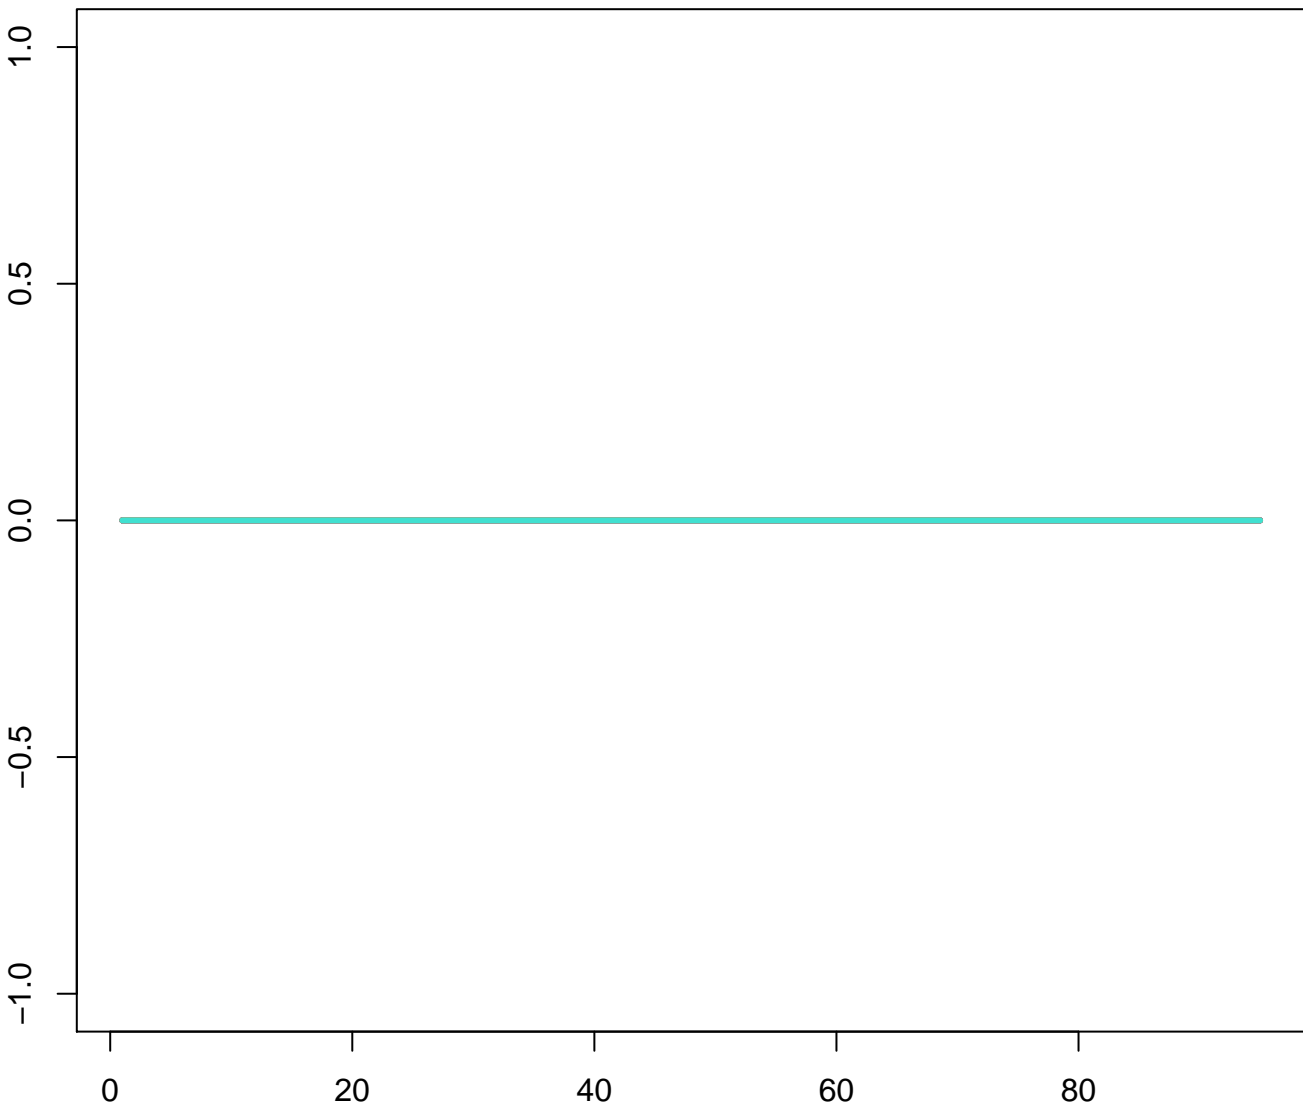

blood brain heart kidney lung ovary skin muscle testis

# 28\_14940550-14940610(+)\_cfa-mir-146b\_high

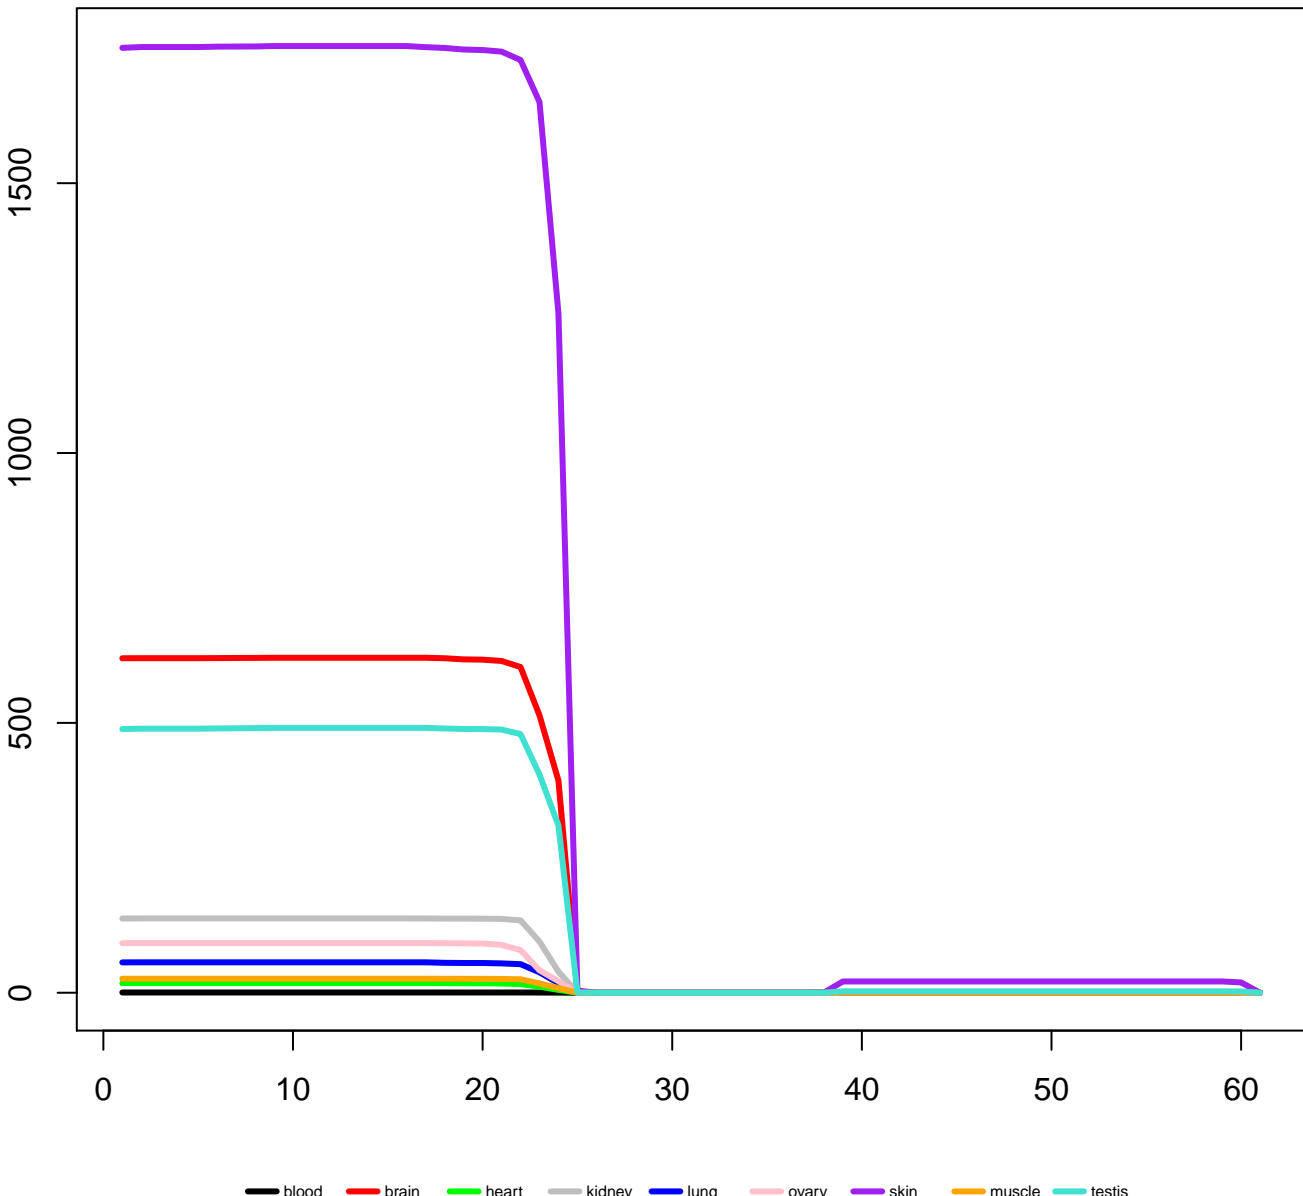

— blood — brain — heart — kidney — lung — ovary — skin — muscle — testis

# 28\_15765927-15765986(-)\_cfa-mir-1307\_high

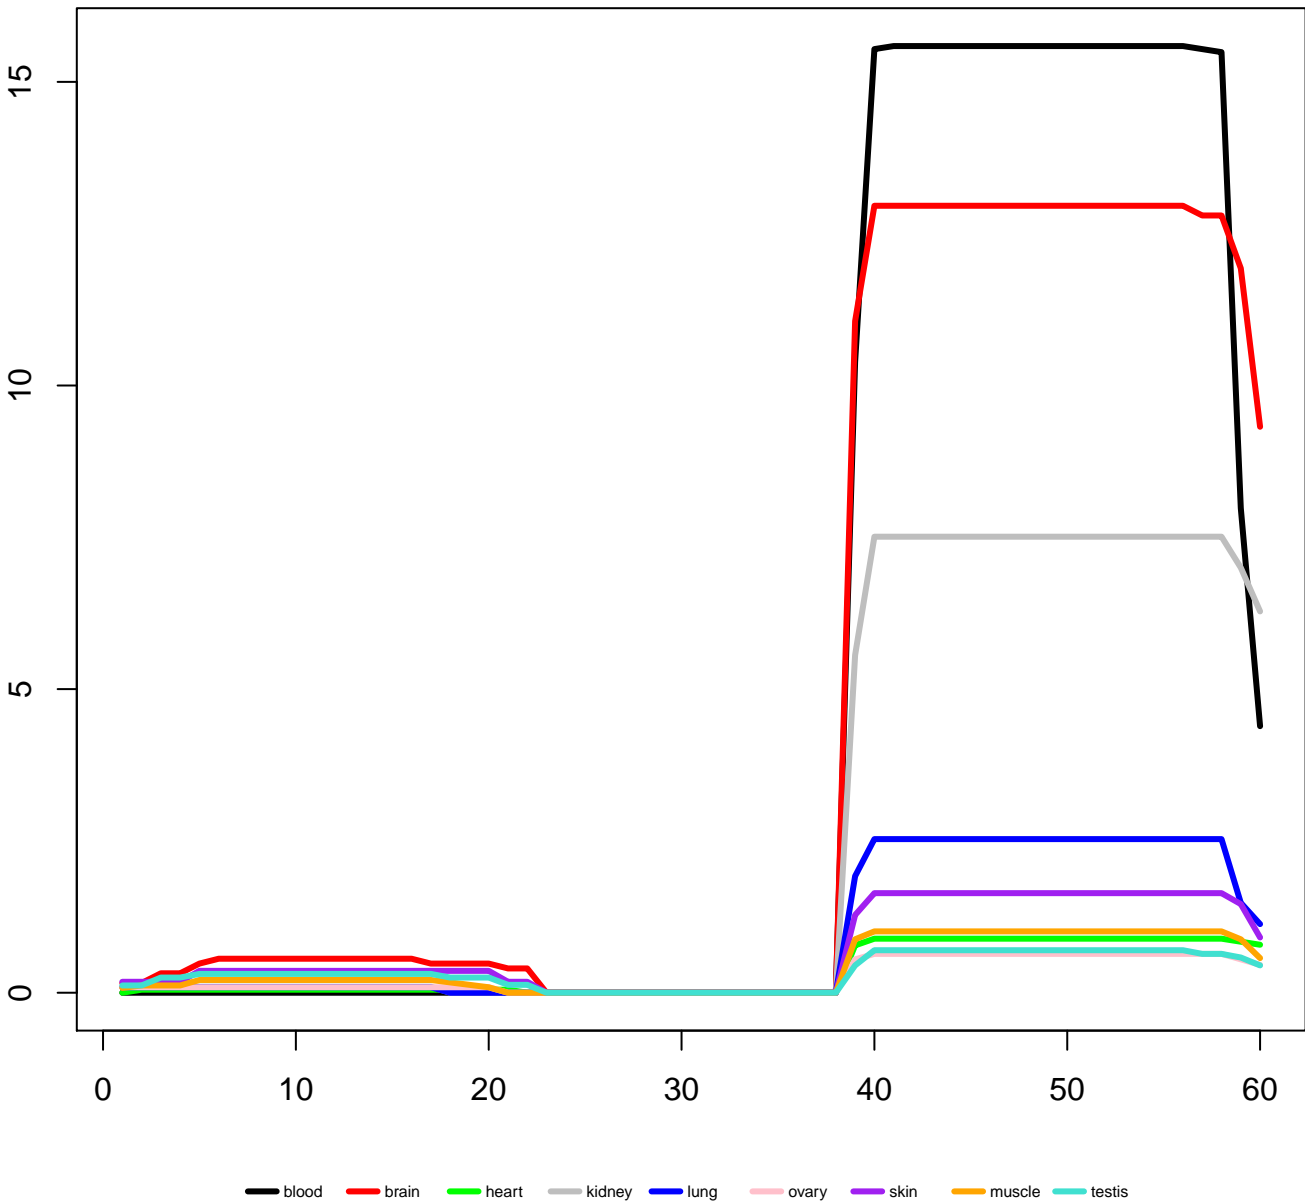

# 28\_15916916-15917048(+)\_cfa-mir-8816\_low

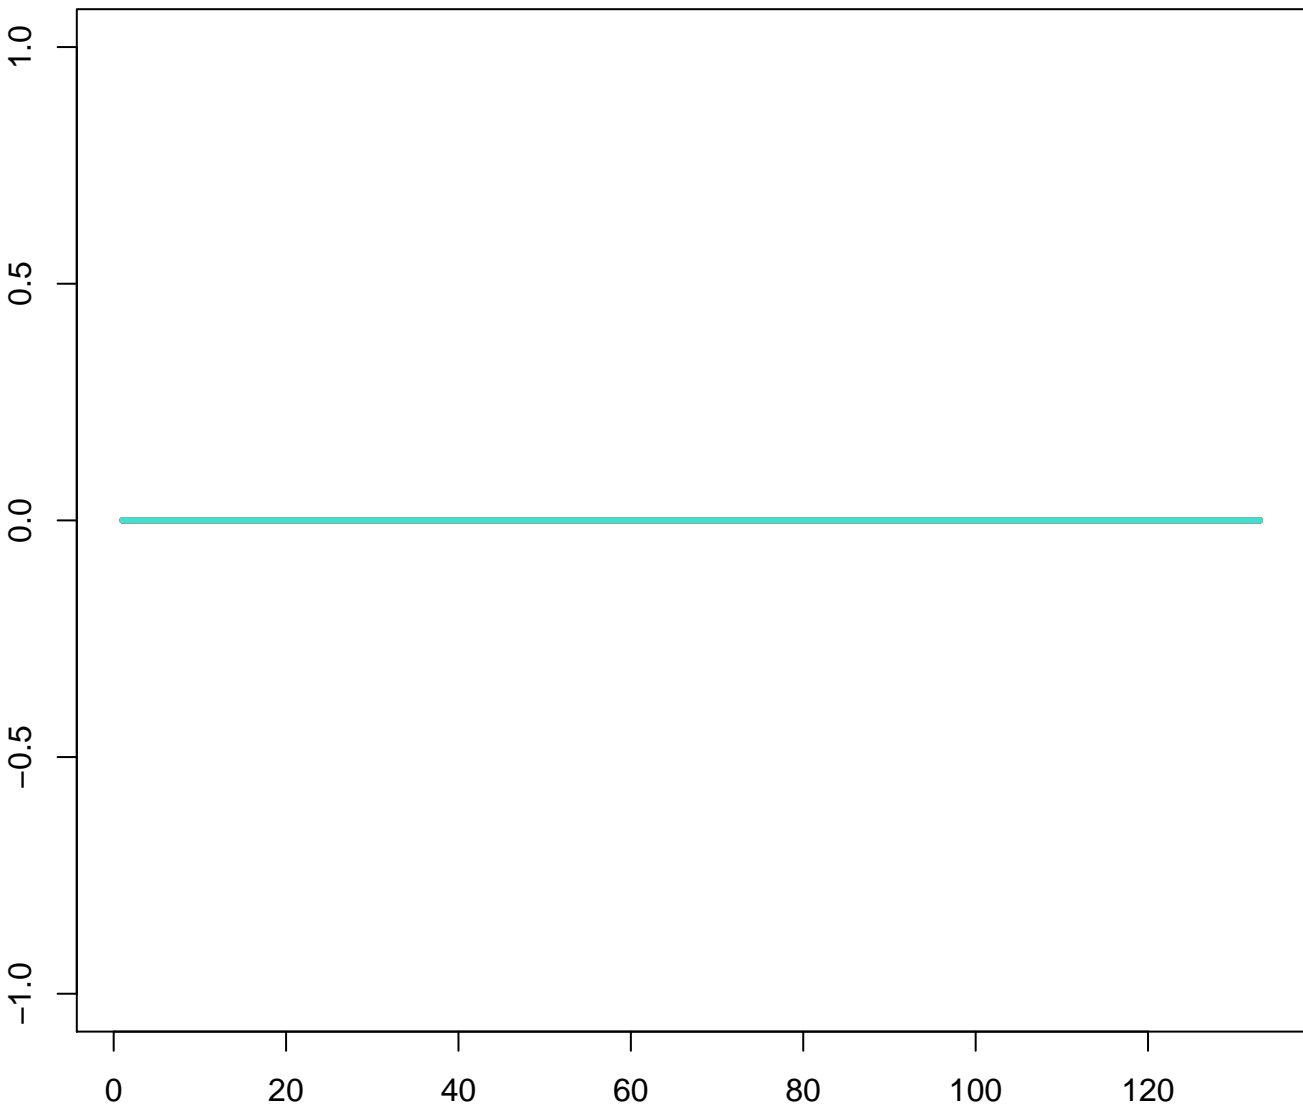

blood brain heart kidney lung ovary skin muscle testis

# 28\_22226258-22226329(+)\_mir-4680\_low

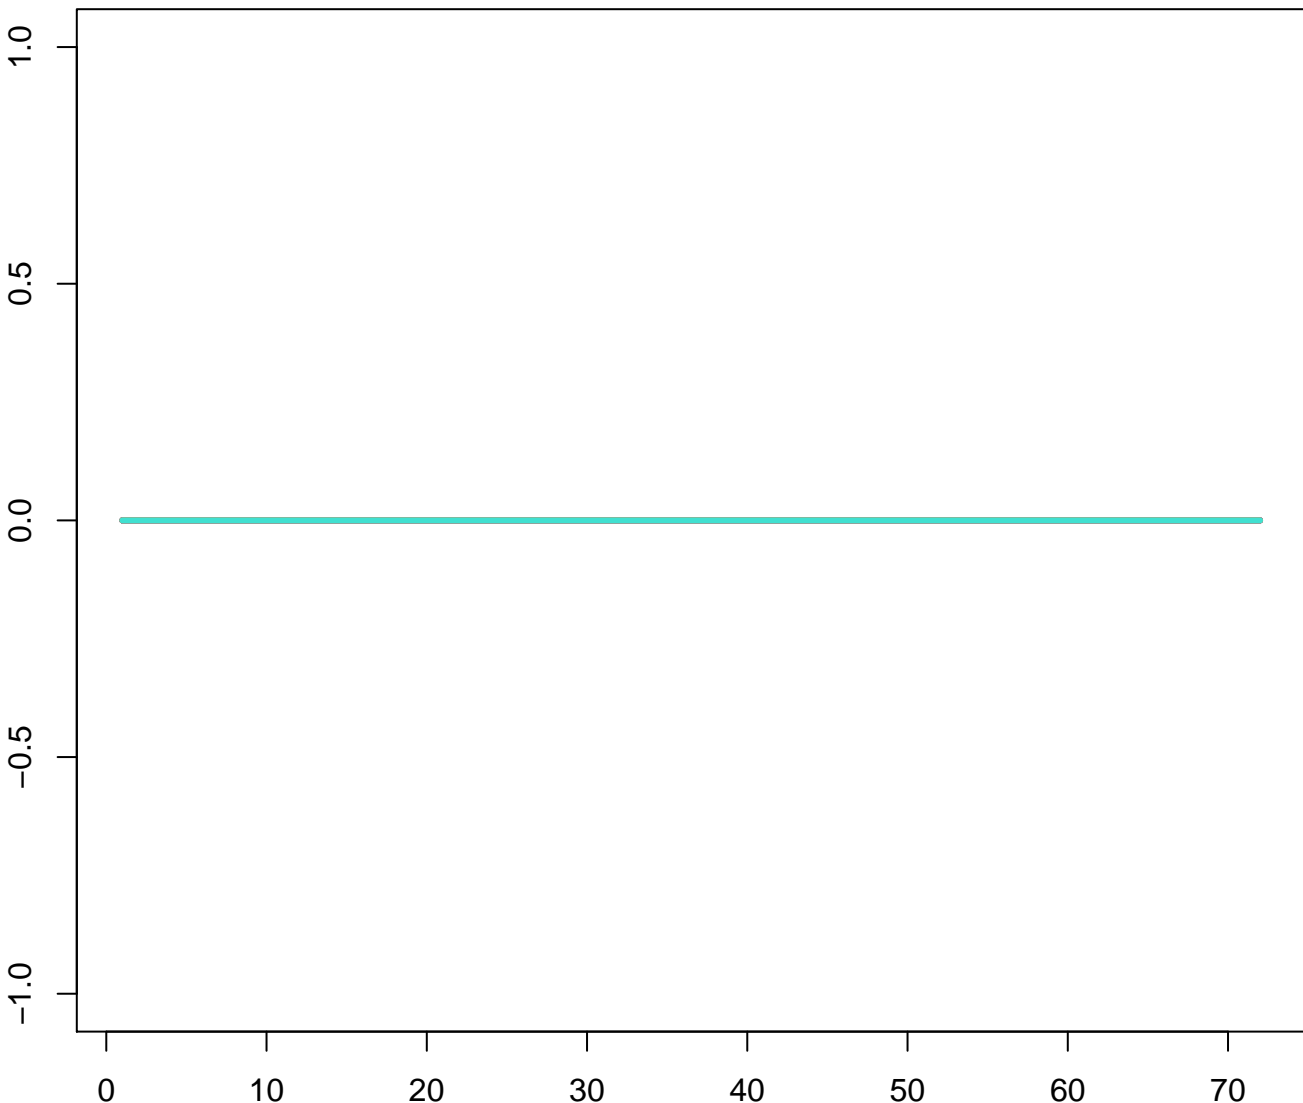

blood brain heart kidney lung ovary skin muscle testis







# 28\_37593890-37594018(-)\_cfa-mir-8817\_low

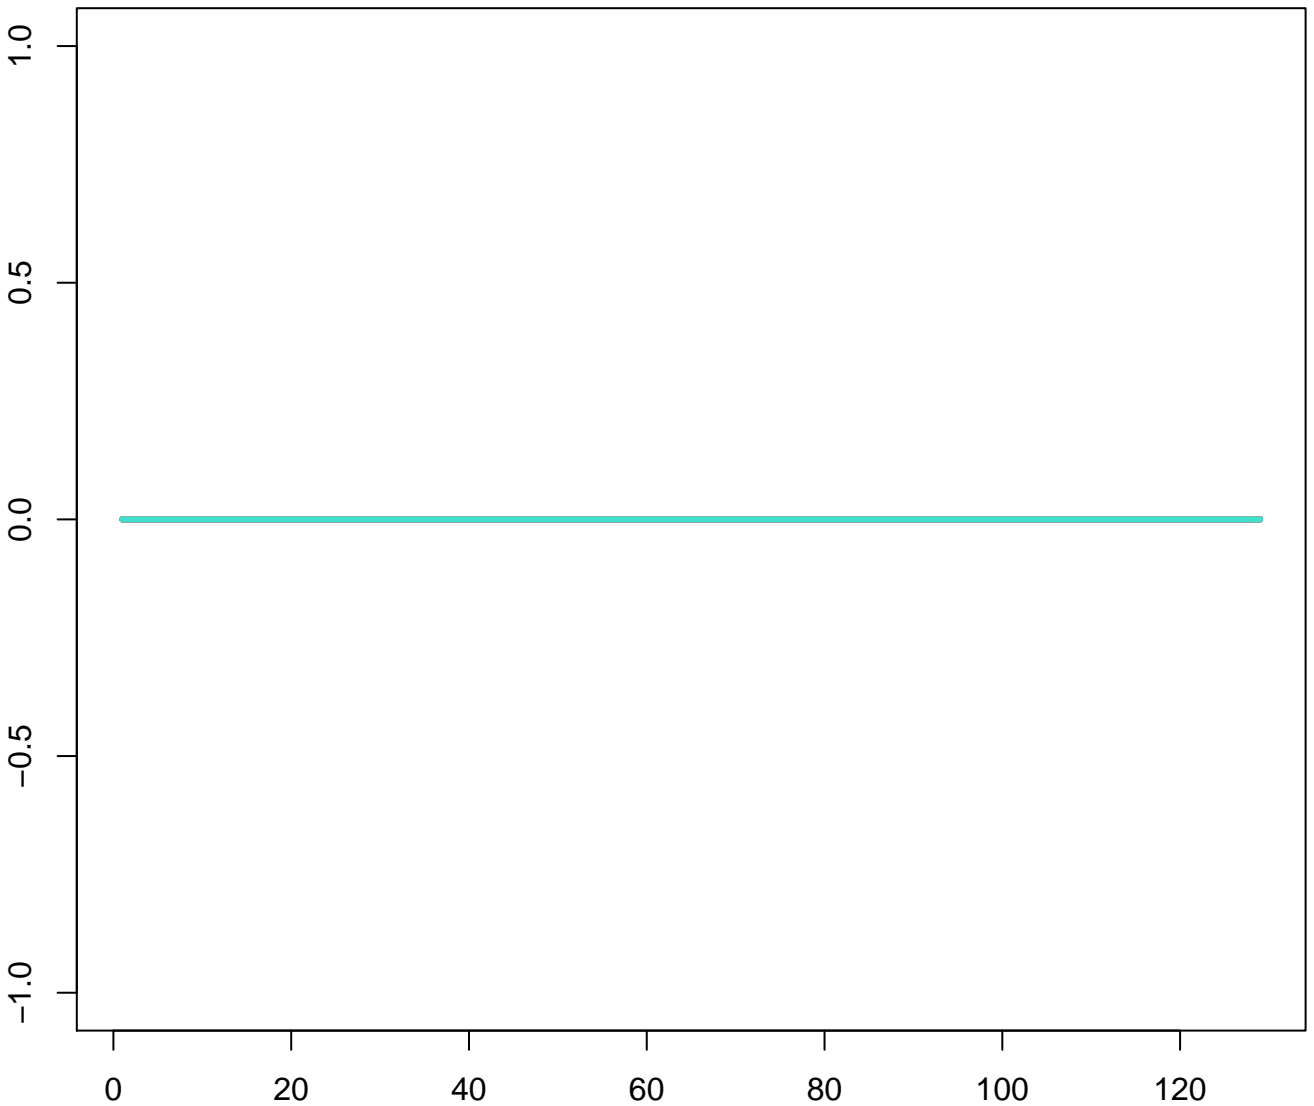

blood brain heart kidney lung ovary skin muscle testis

# 28\_40842076-40842146(-)\_cfa-mir-202\_high

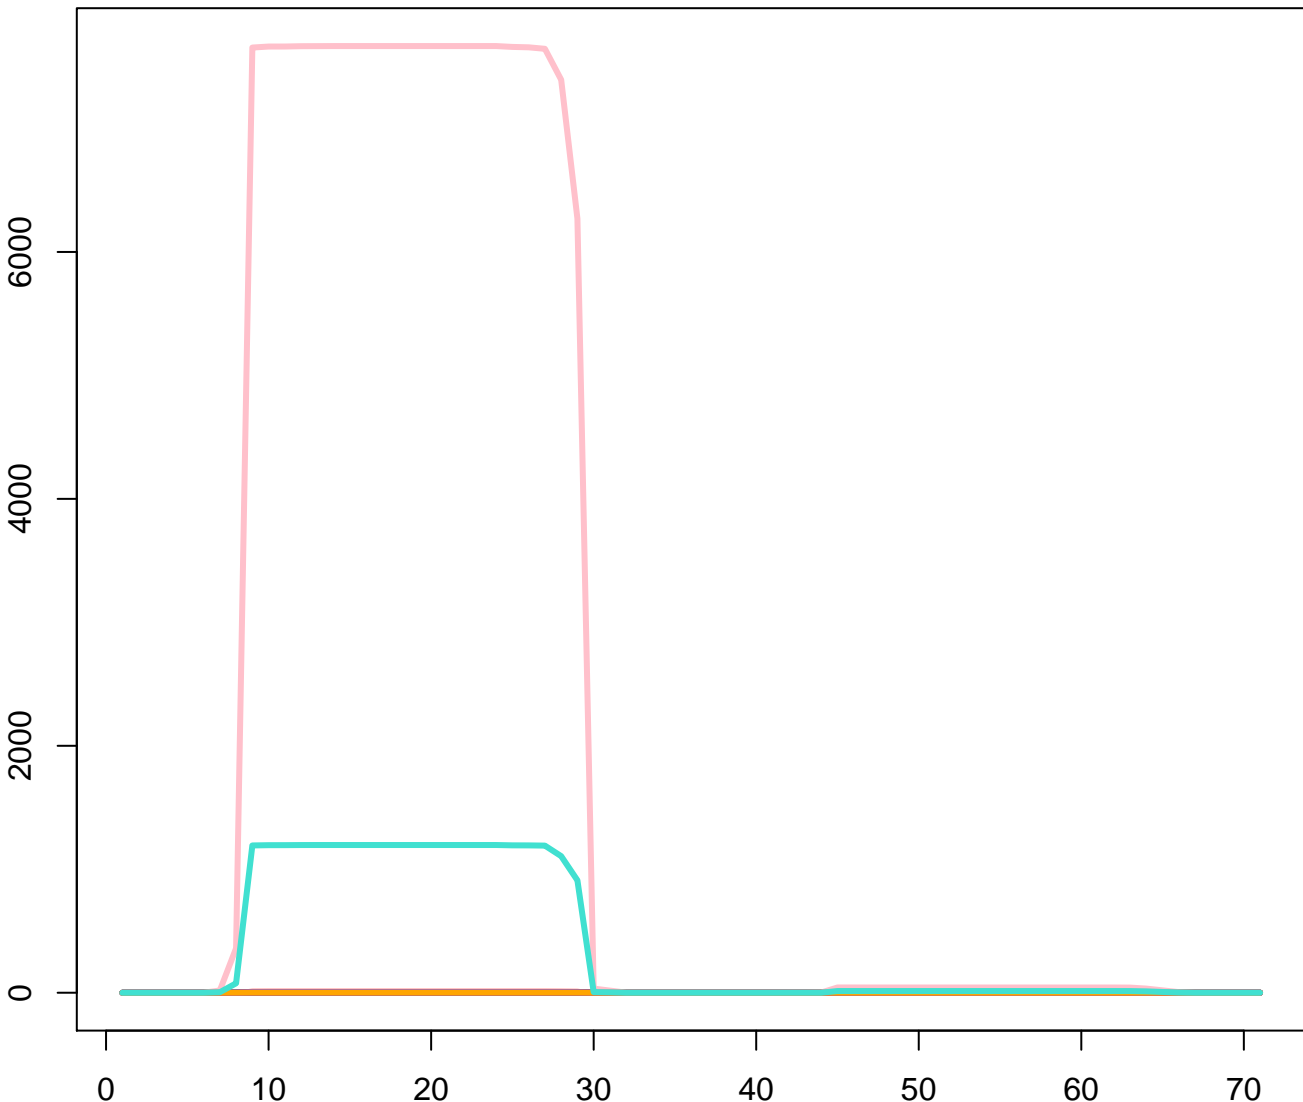

— blood — brain — heart — kidney — lung — ovary — skin — muscle — testis



# 29\_14264389-14264445(+)\_cfa-mir-124-2\_high

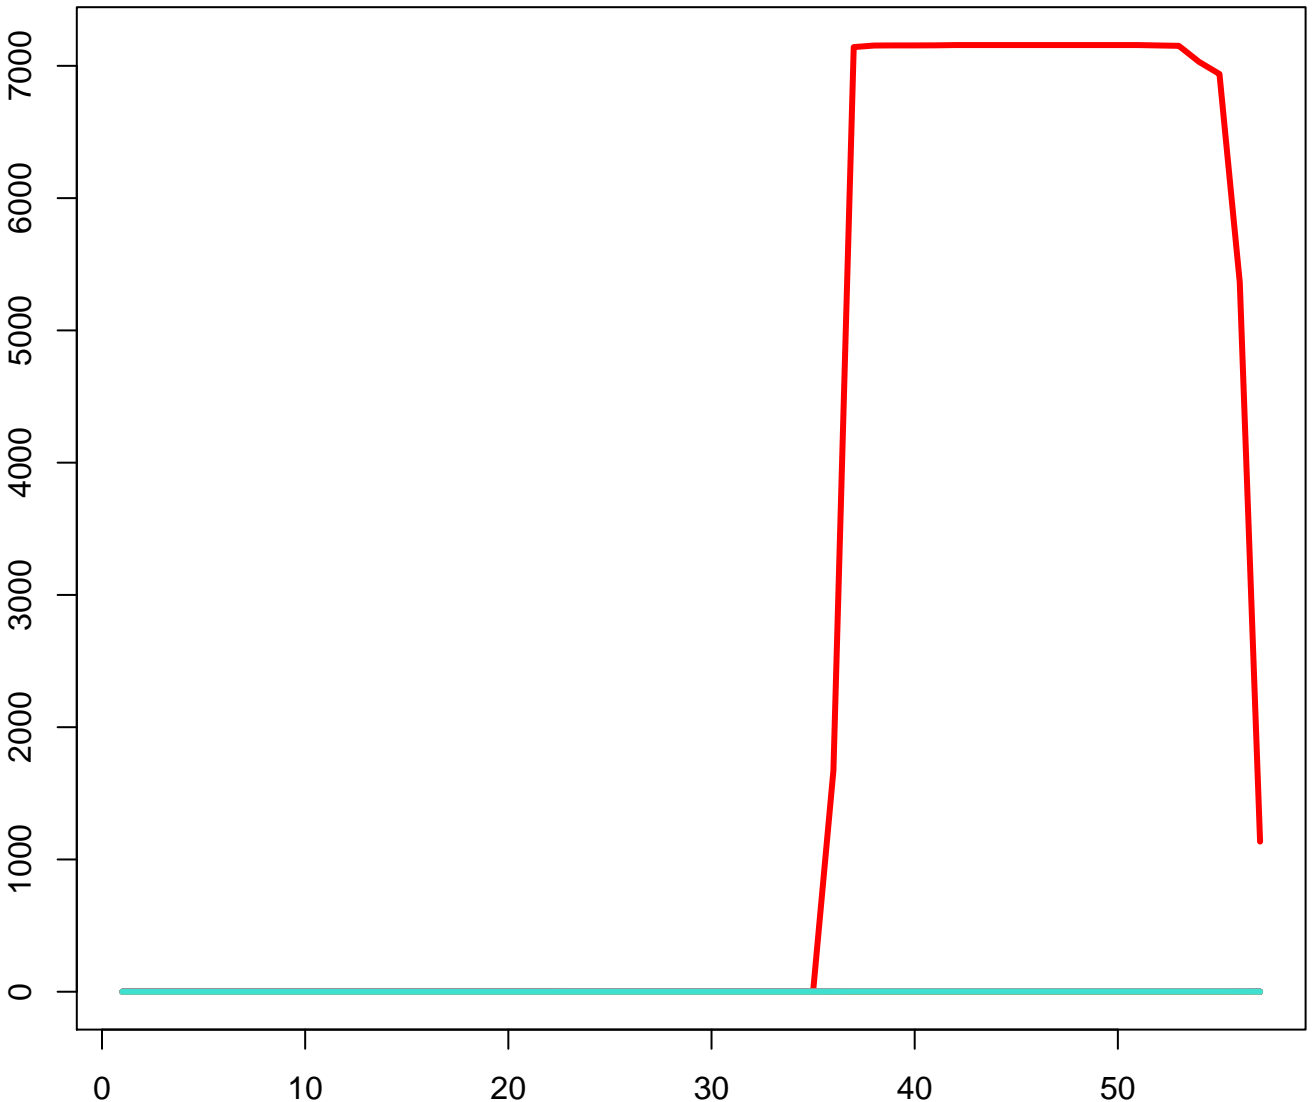

— blood — brain — heart — kidney — lung — ovary — skin — muscle — testis

# 29\_29264004-29264126(+)\_cfa-mir-8799b\_low

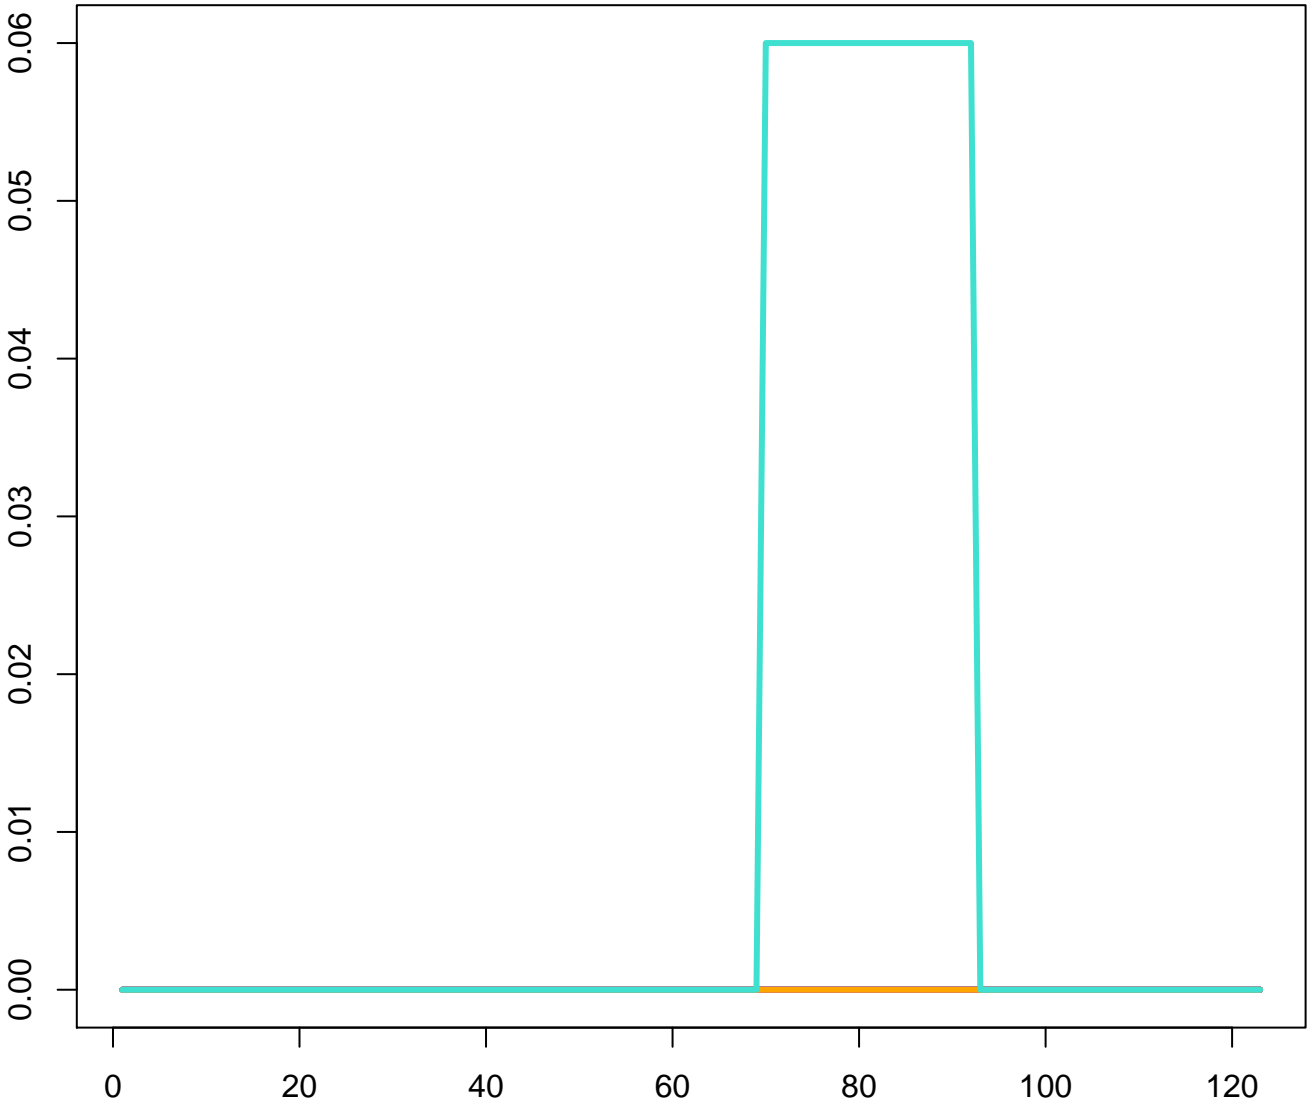

blood brain heart kidney lung ovary skin muscle testis

### 3\_19997697-19997756(+)\_cfa-mir-9-2\_high

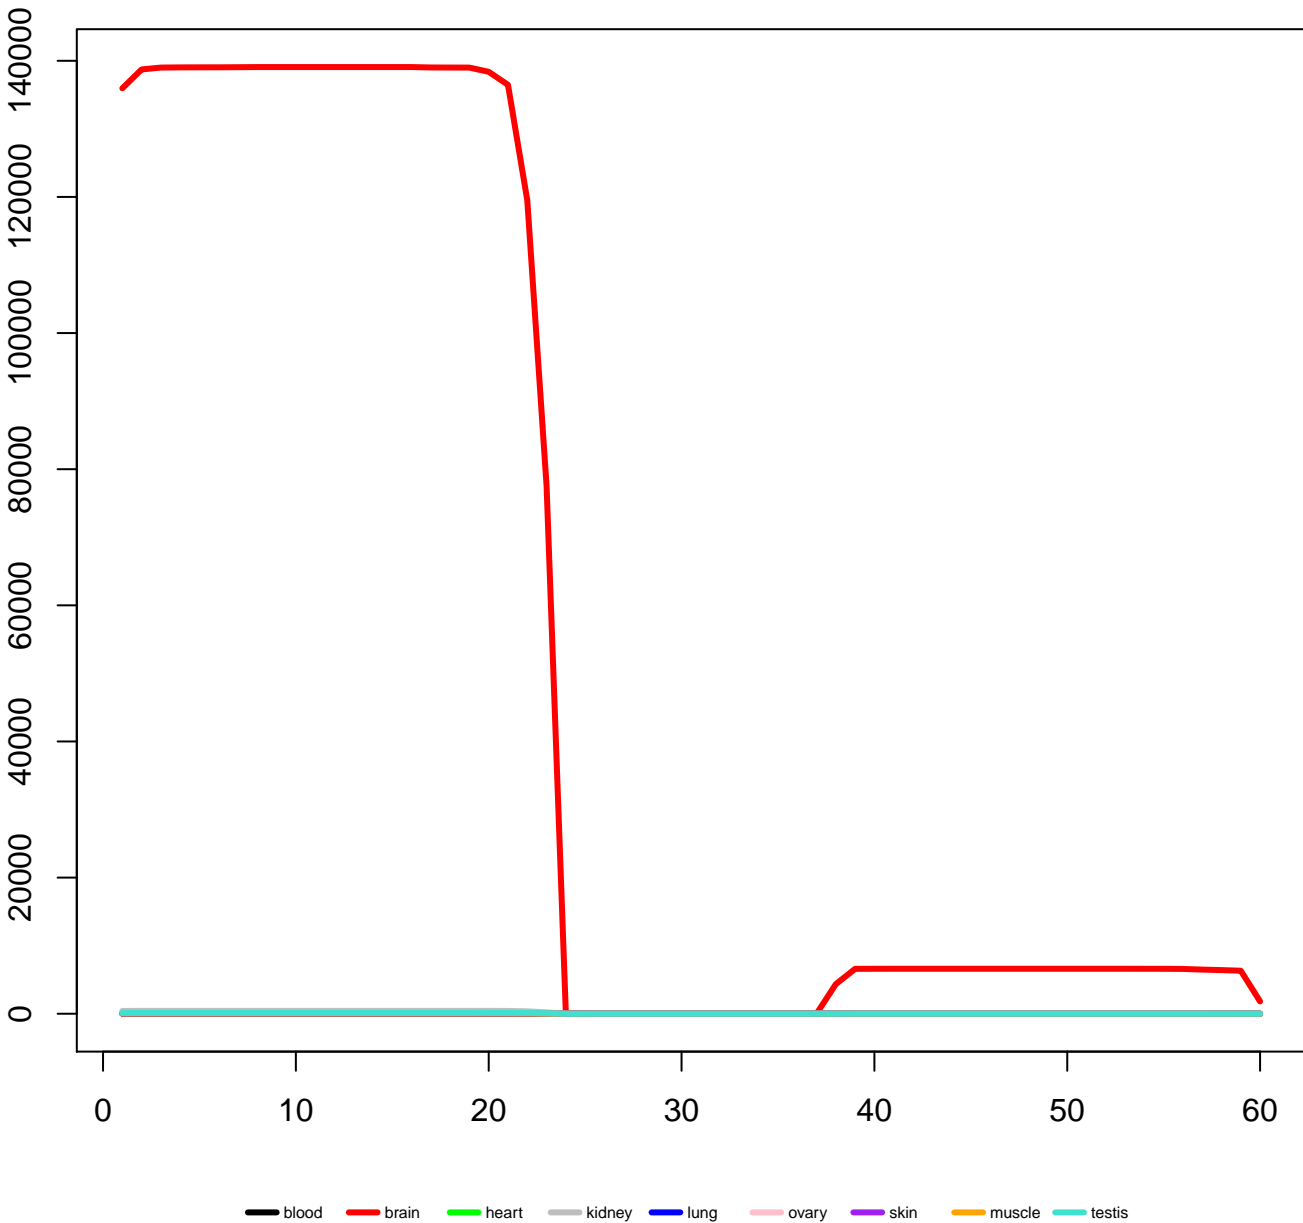





### 3\_31262394-31262490(-)\_cfa-mir-8901\_low

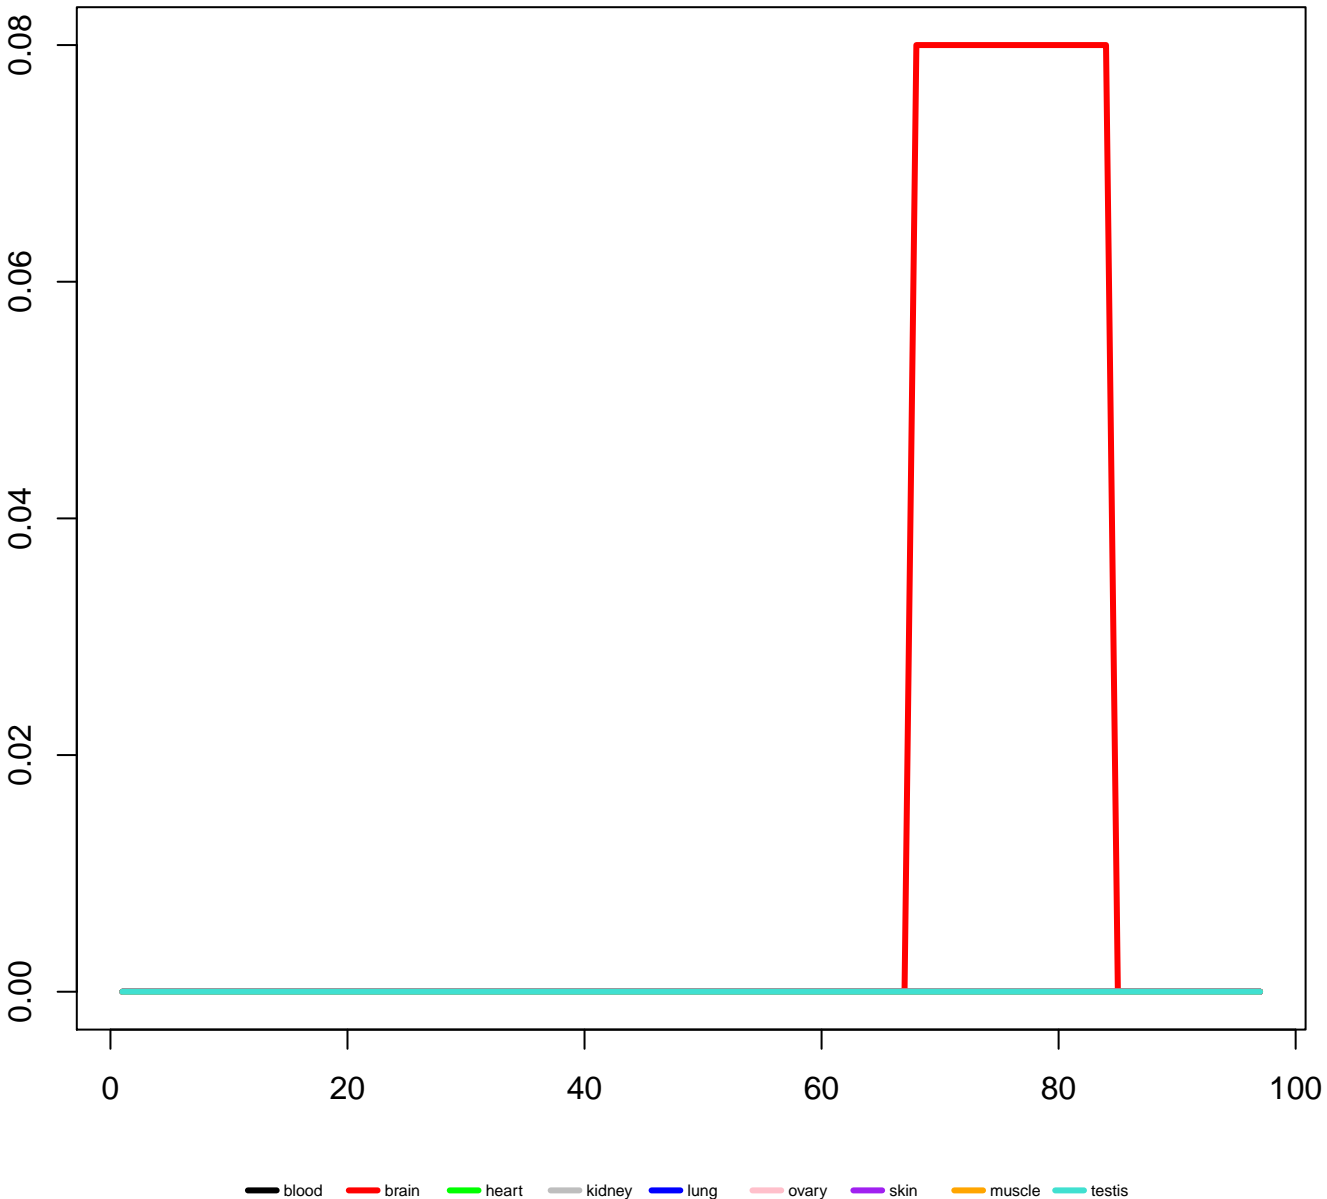

### 3\_31617282-31617378(+)\_cfa-mir-8901\_low

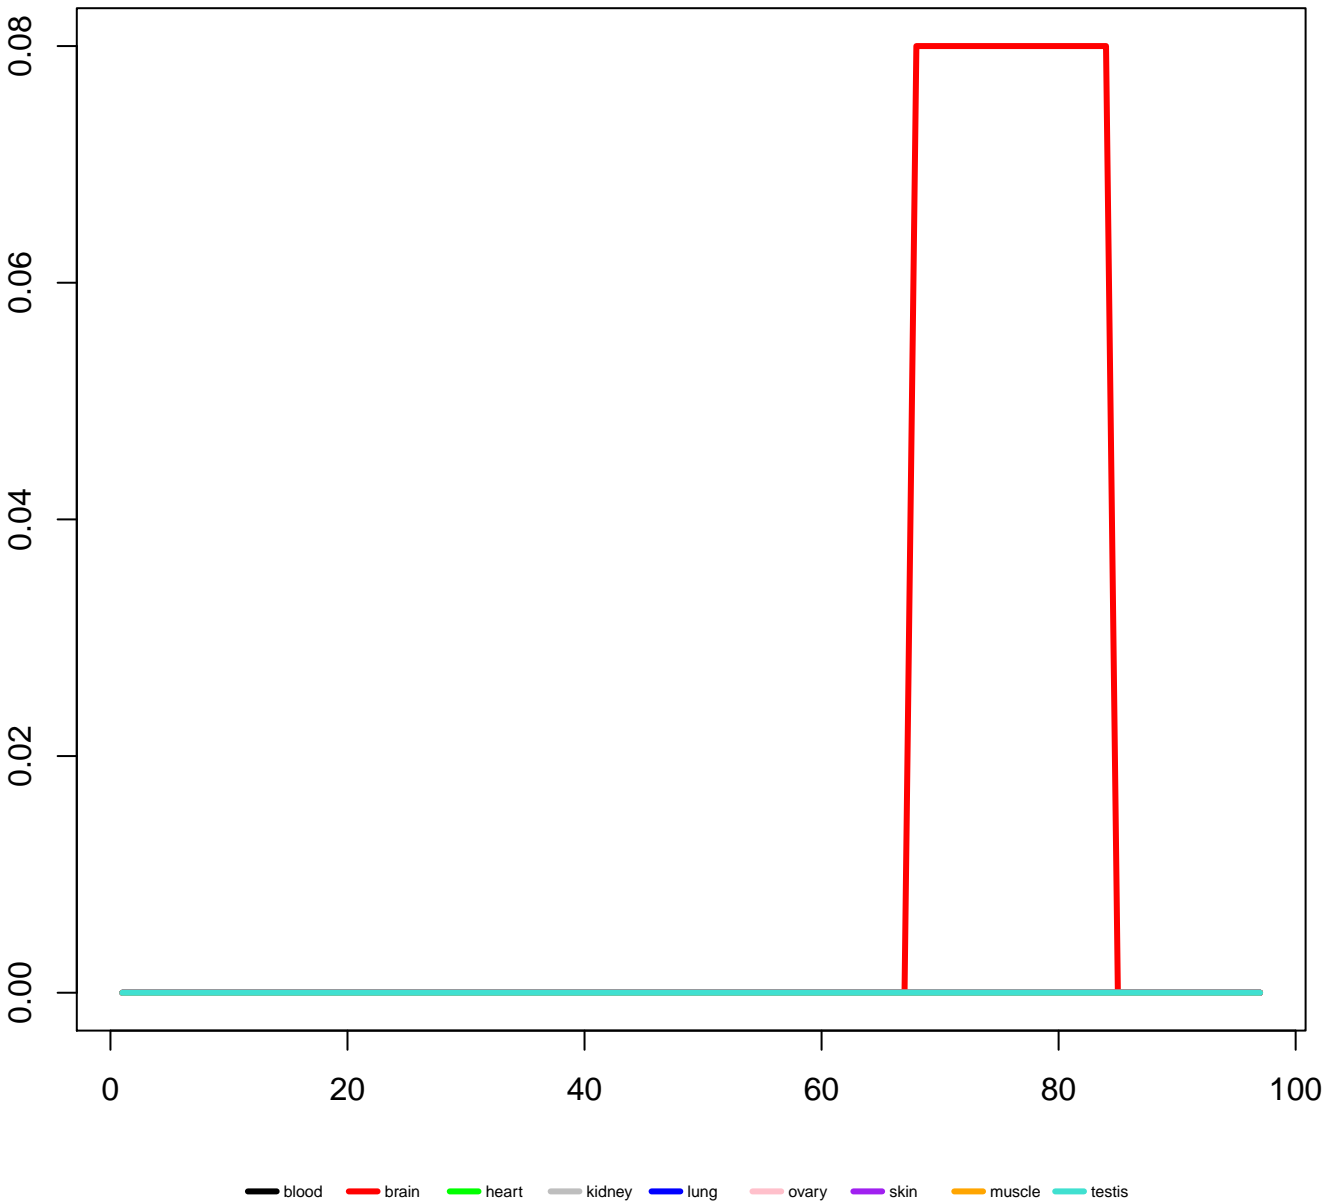

### 3\_32684275-32684397(-)\_cfa-mir-8799g\_low

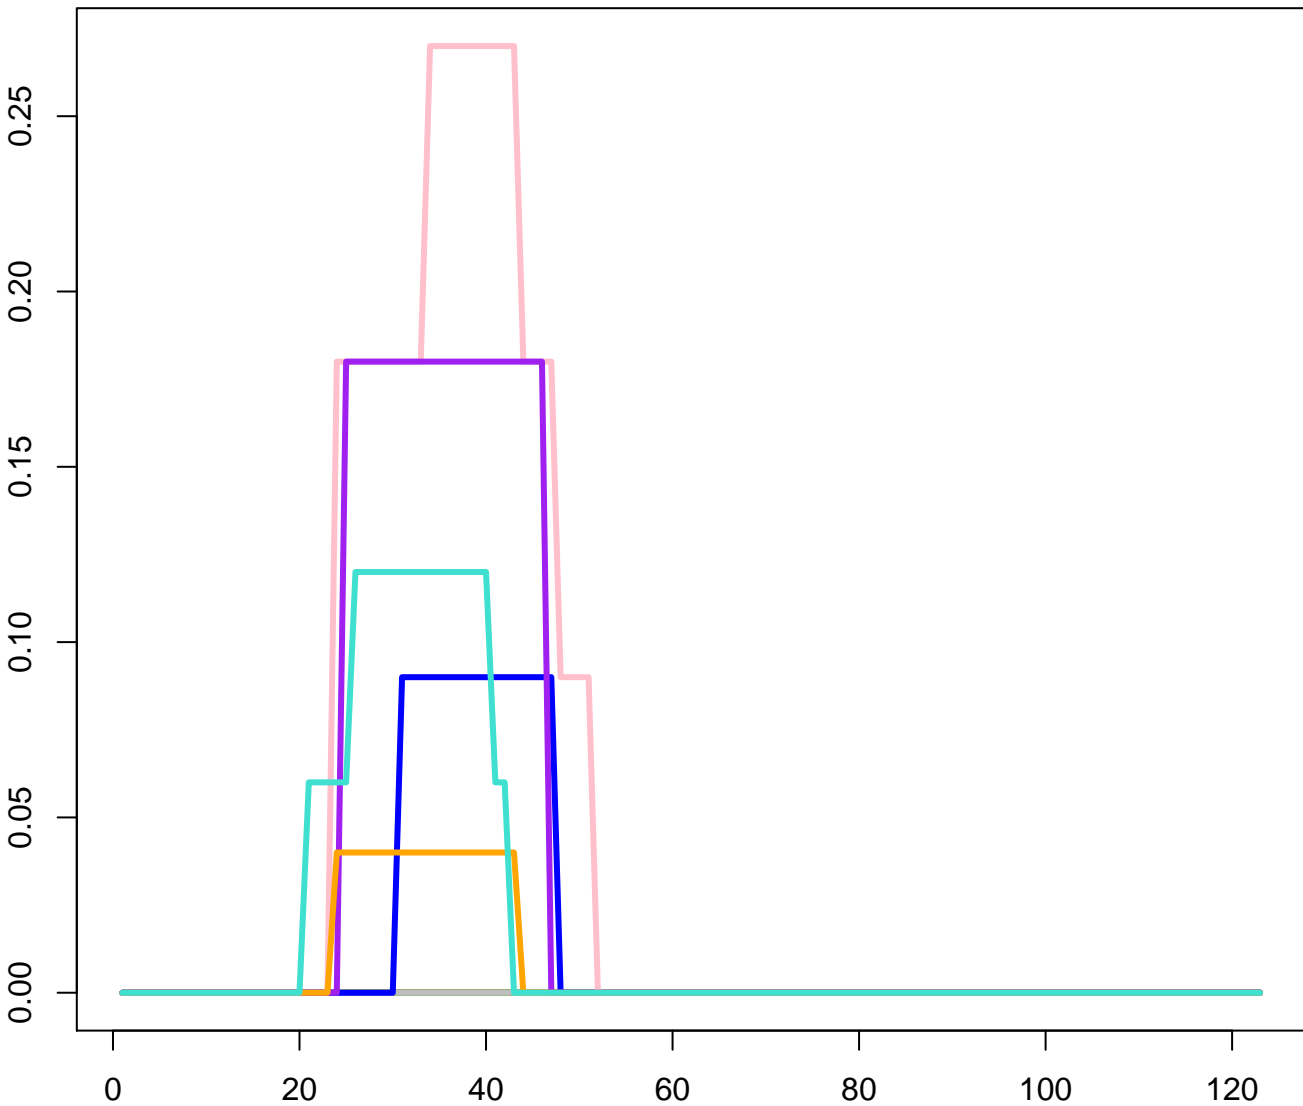

blood brain heart kidney lung ovary skin muscle testis

### 3\_37882660-37882759(+)\_cfa-mir-211\_high

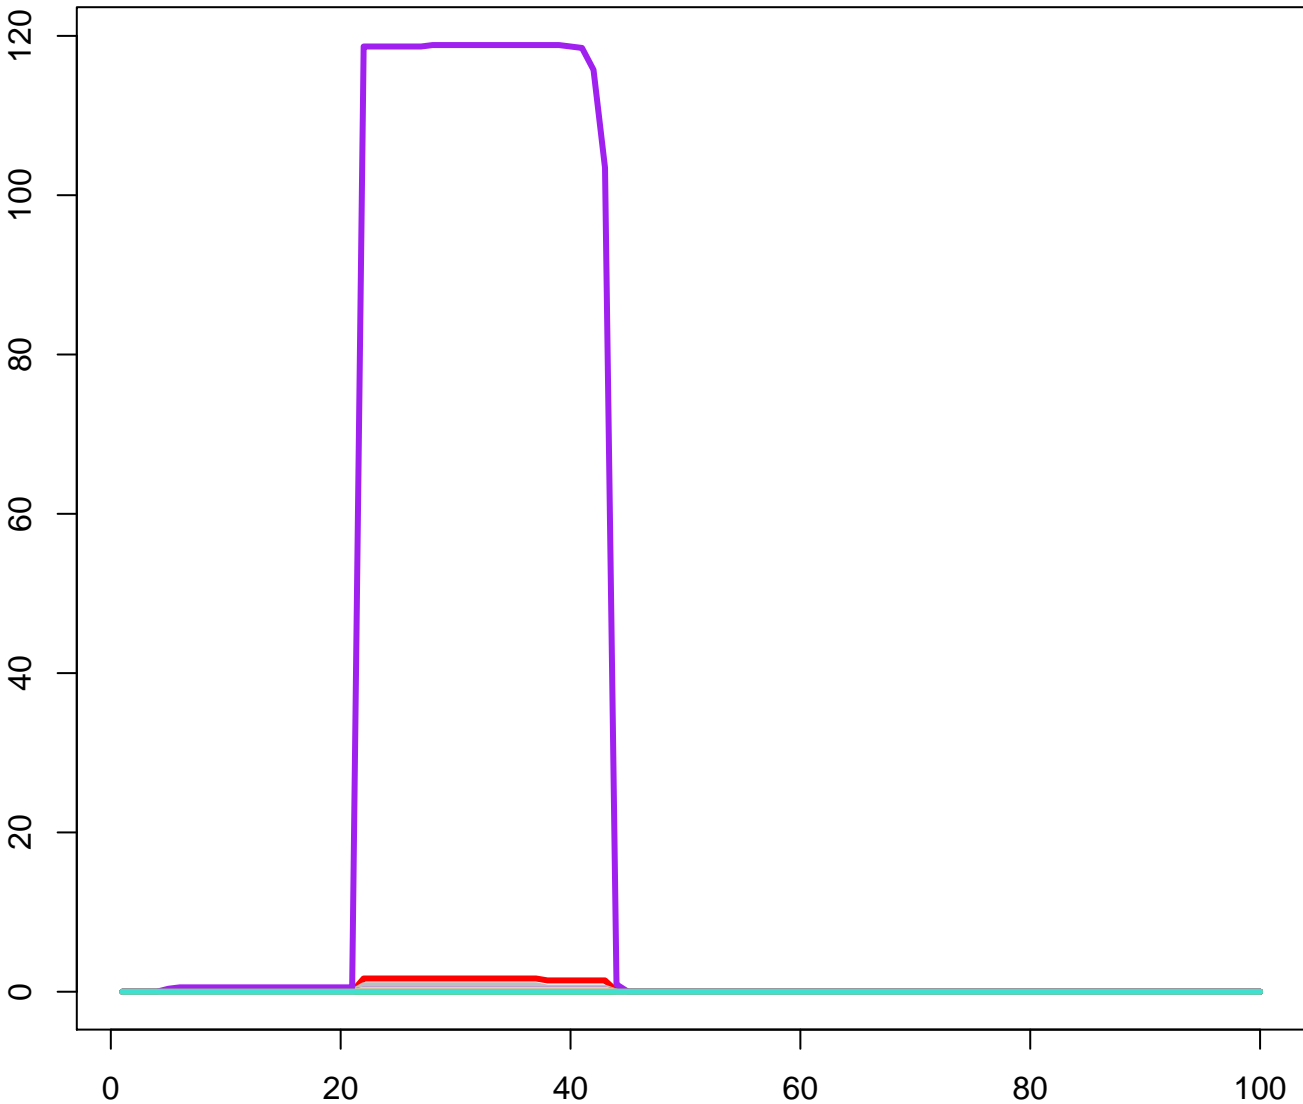

blood brain heart kidney lung ovary skin muscle testis

### 3\_51802454-51802515(+)\_cfa-mir-7-2\_high

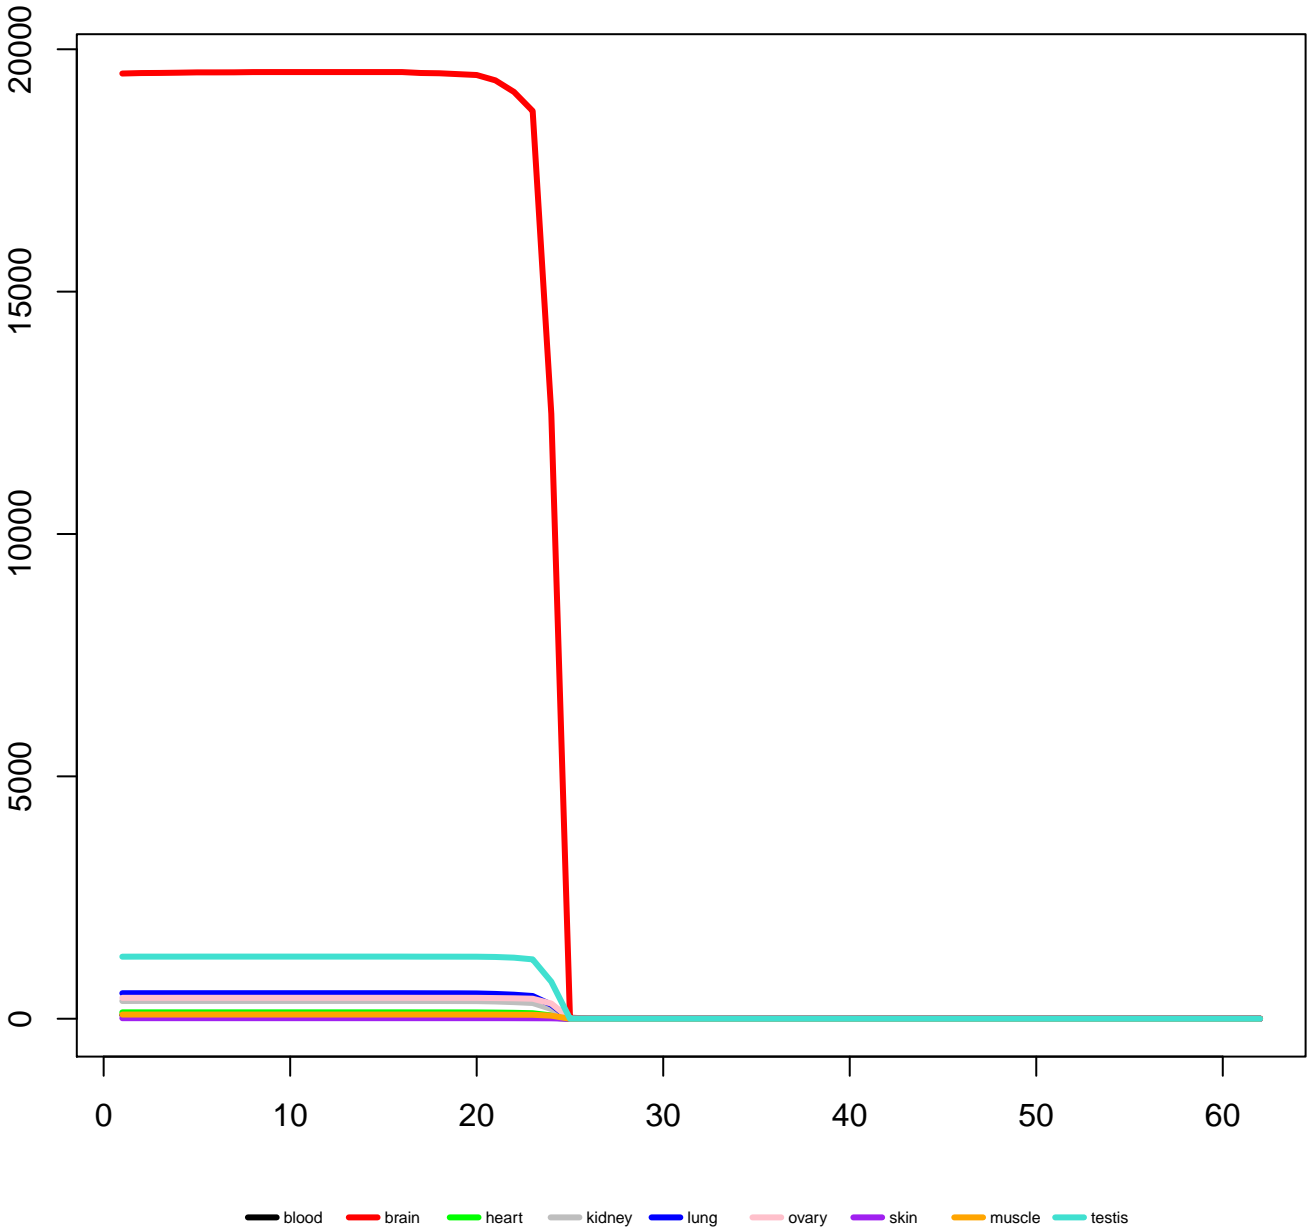

### 3\_52410840-52410900(+)\_cfa-mir-9-3\_high

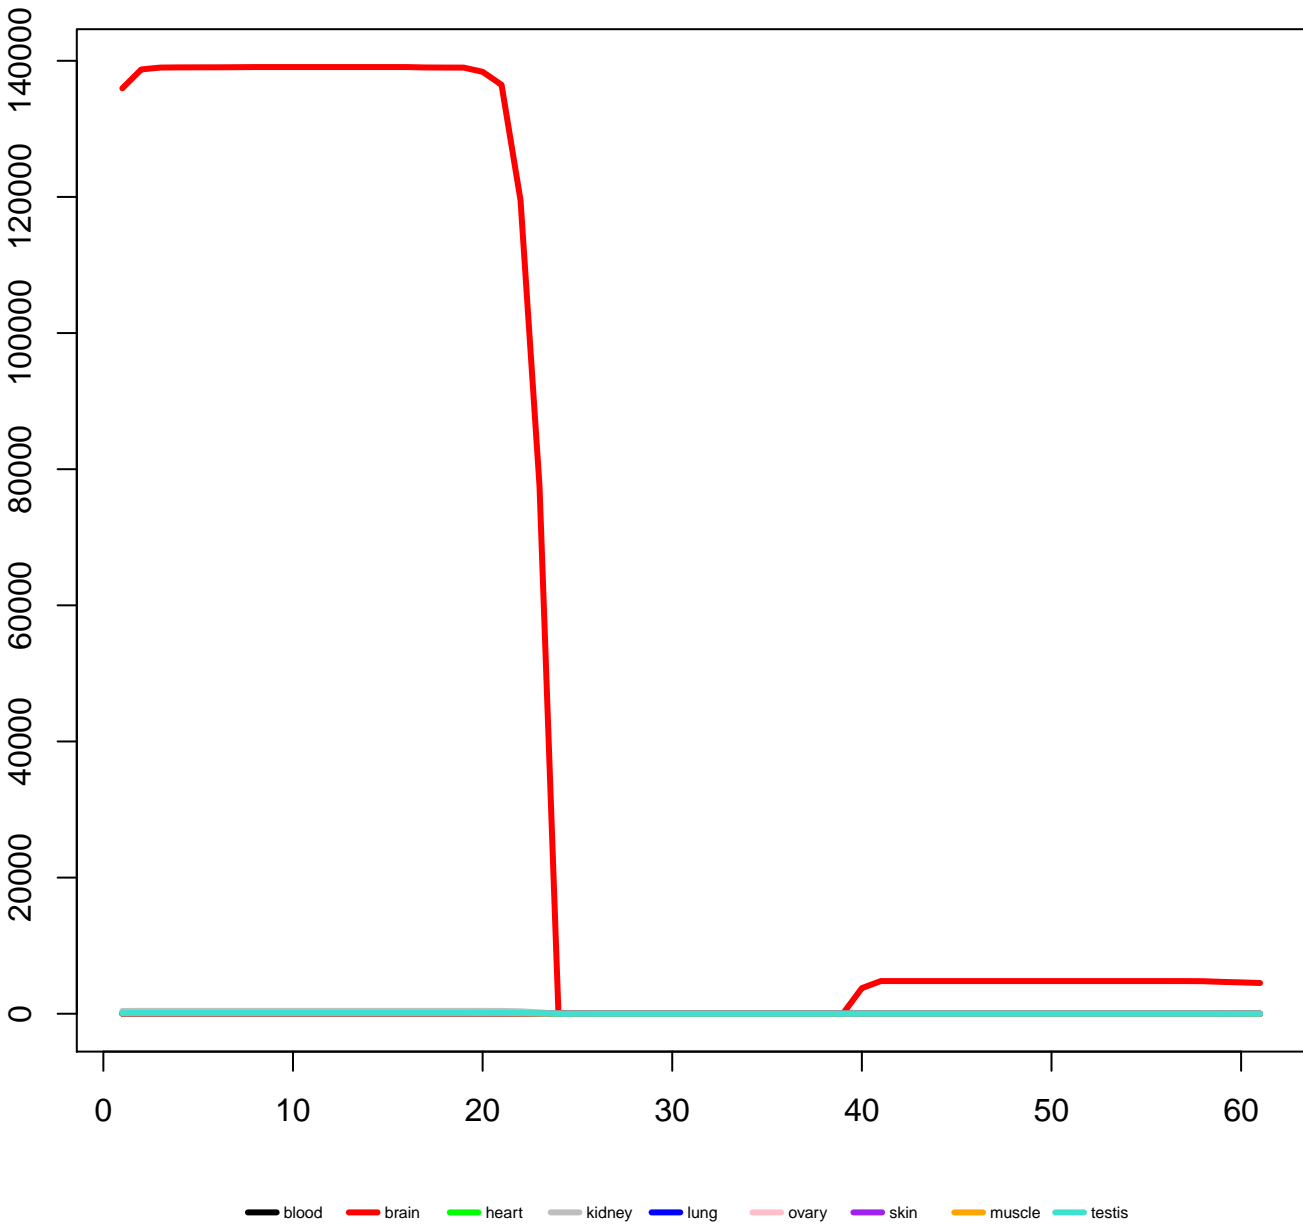

### 3\_54138599-54138683(+)\_mir-684\_low

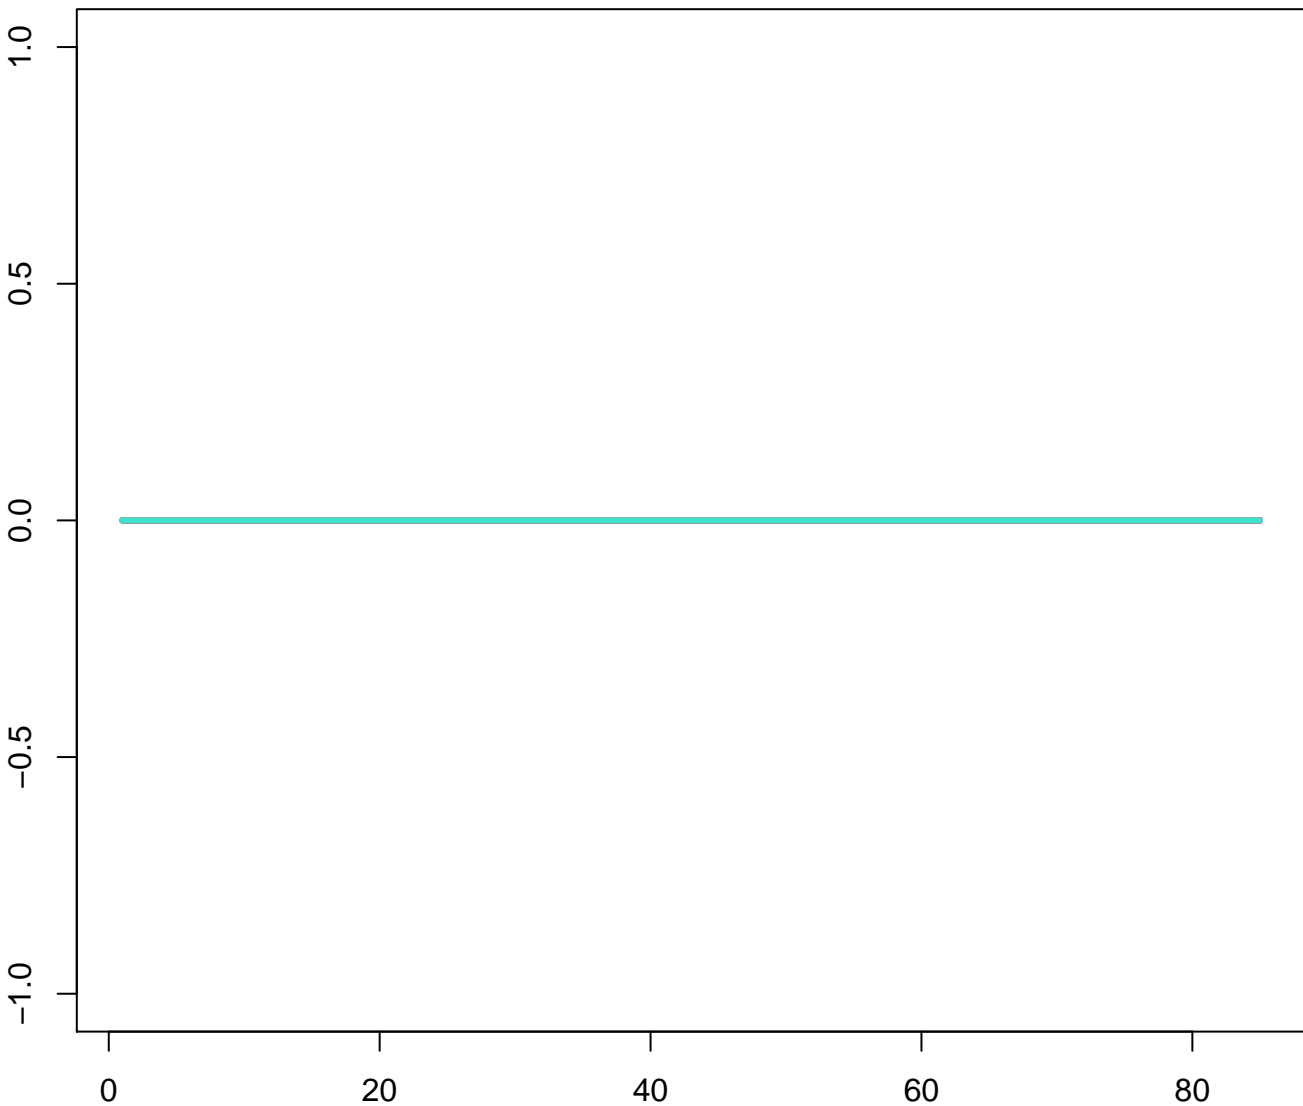

blood brain heart kidney lung ovary skin muscle testis



### 3\_54579692-54579764(+)\_cfa-mir-1839\_high

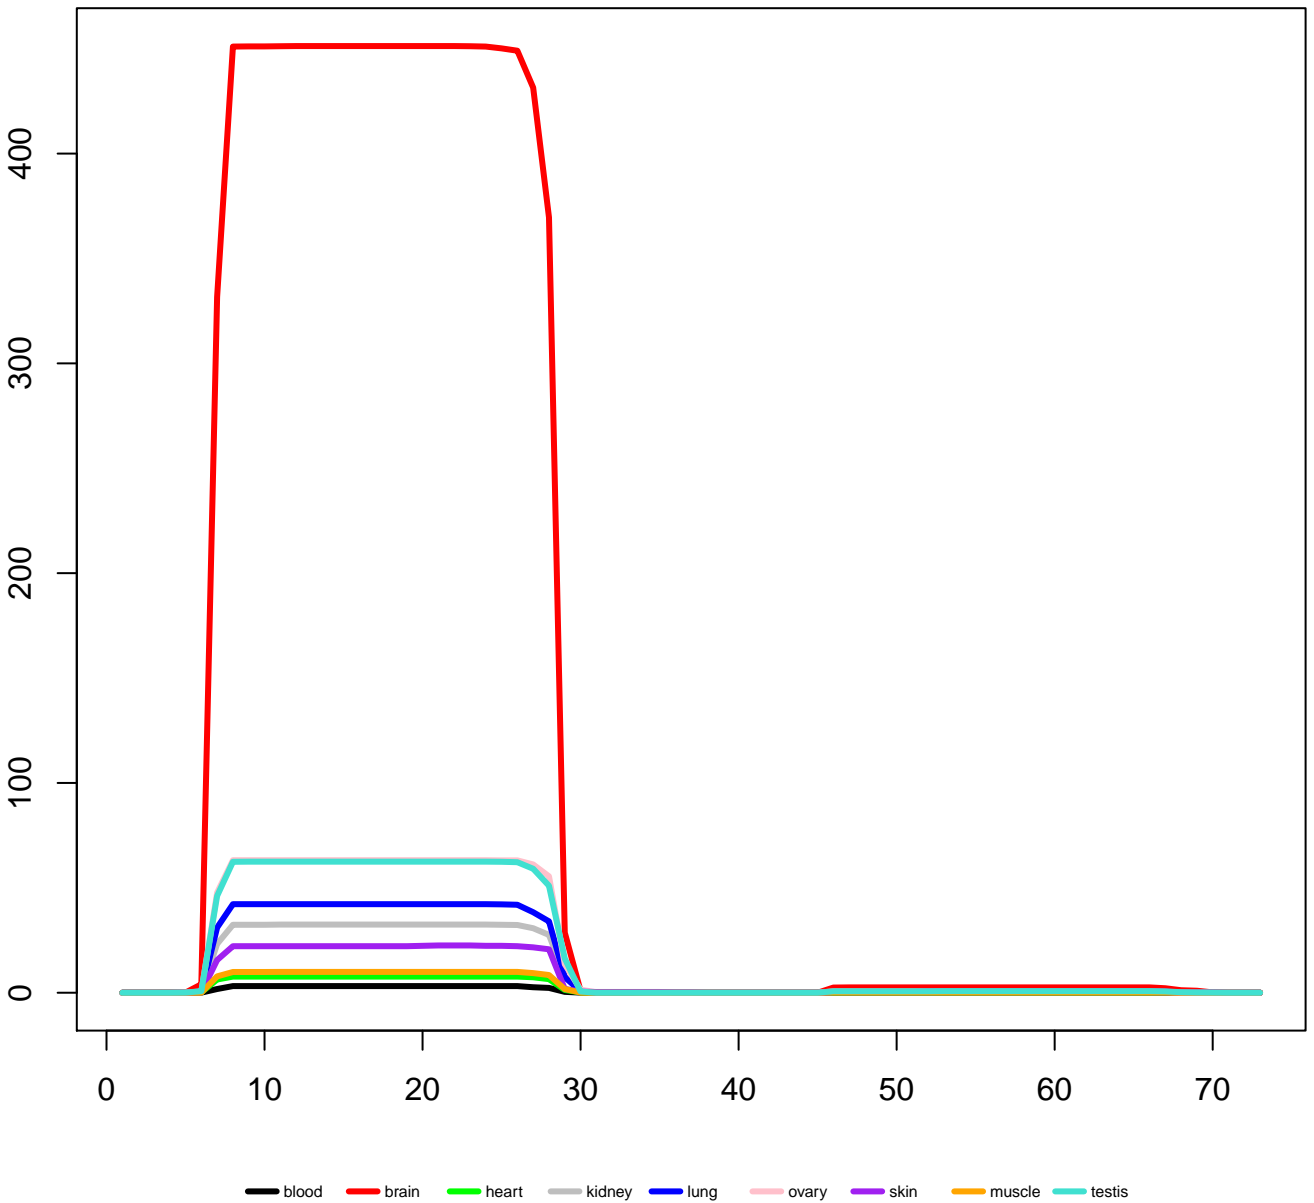

### 3\_54657737-54657879(-)\_cfa-mir-8898\_low

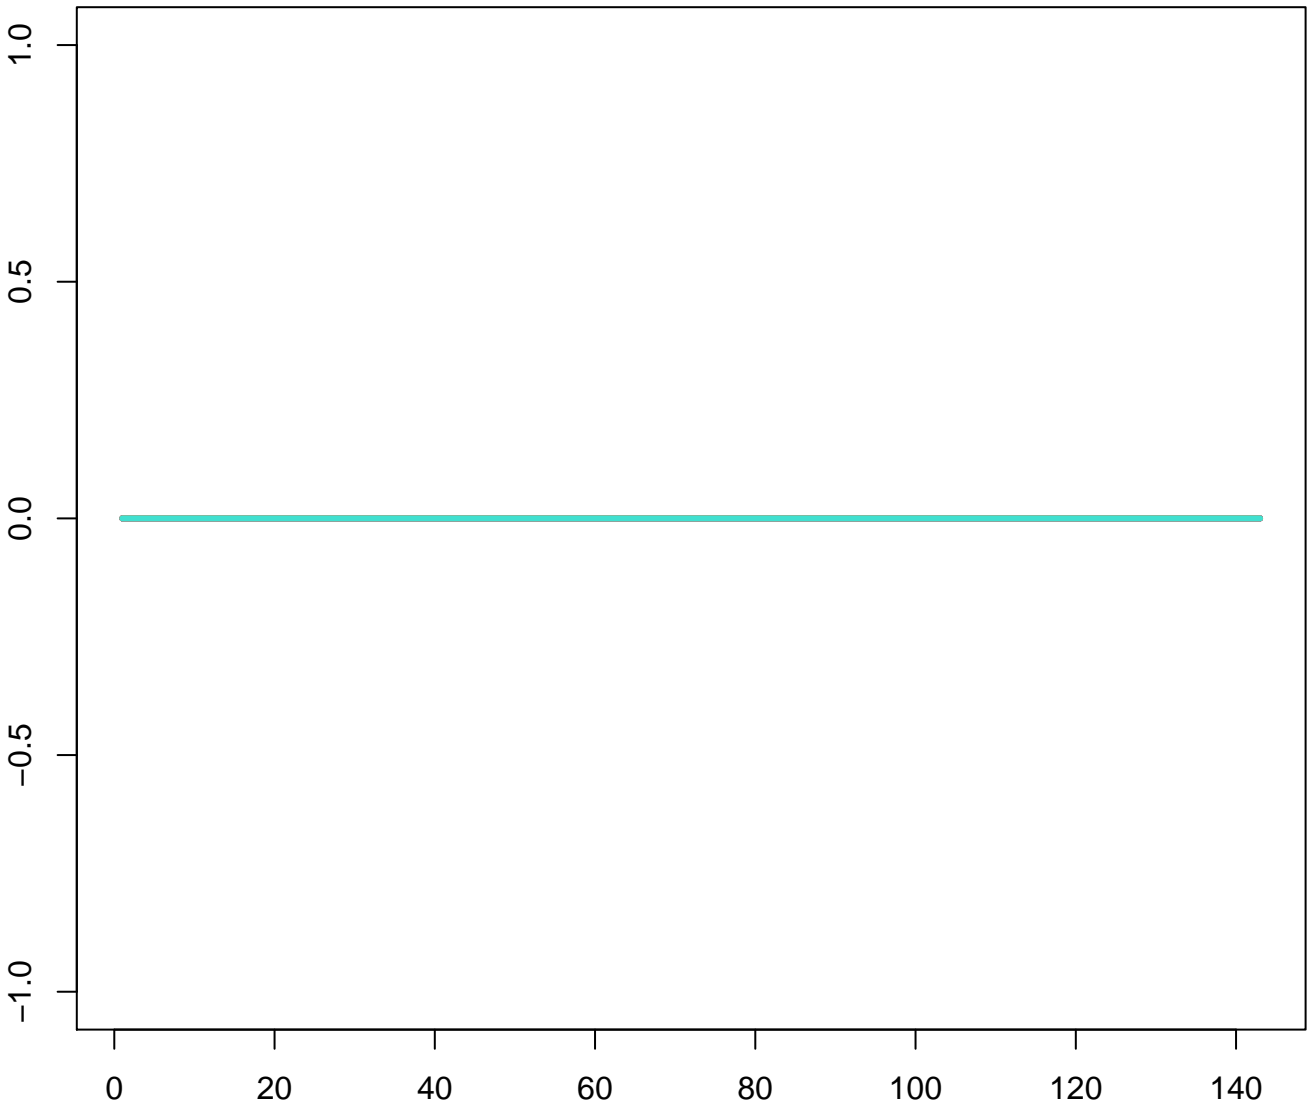

blood brain heart kidney lung ovary skin muscle testis

### 3\_55912906-55912992(-)\_mir-1905\_low

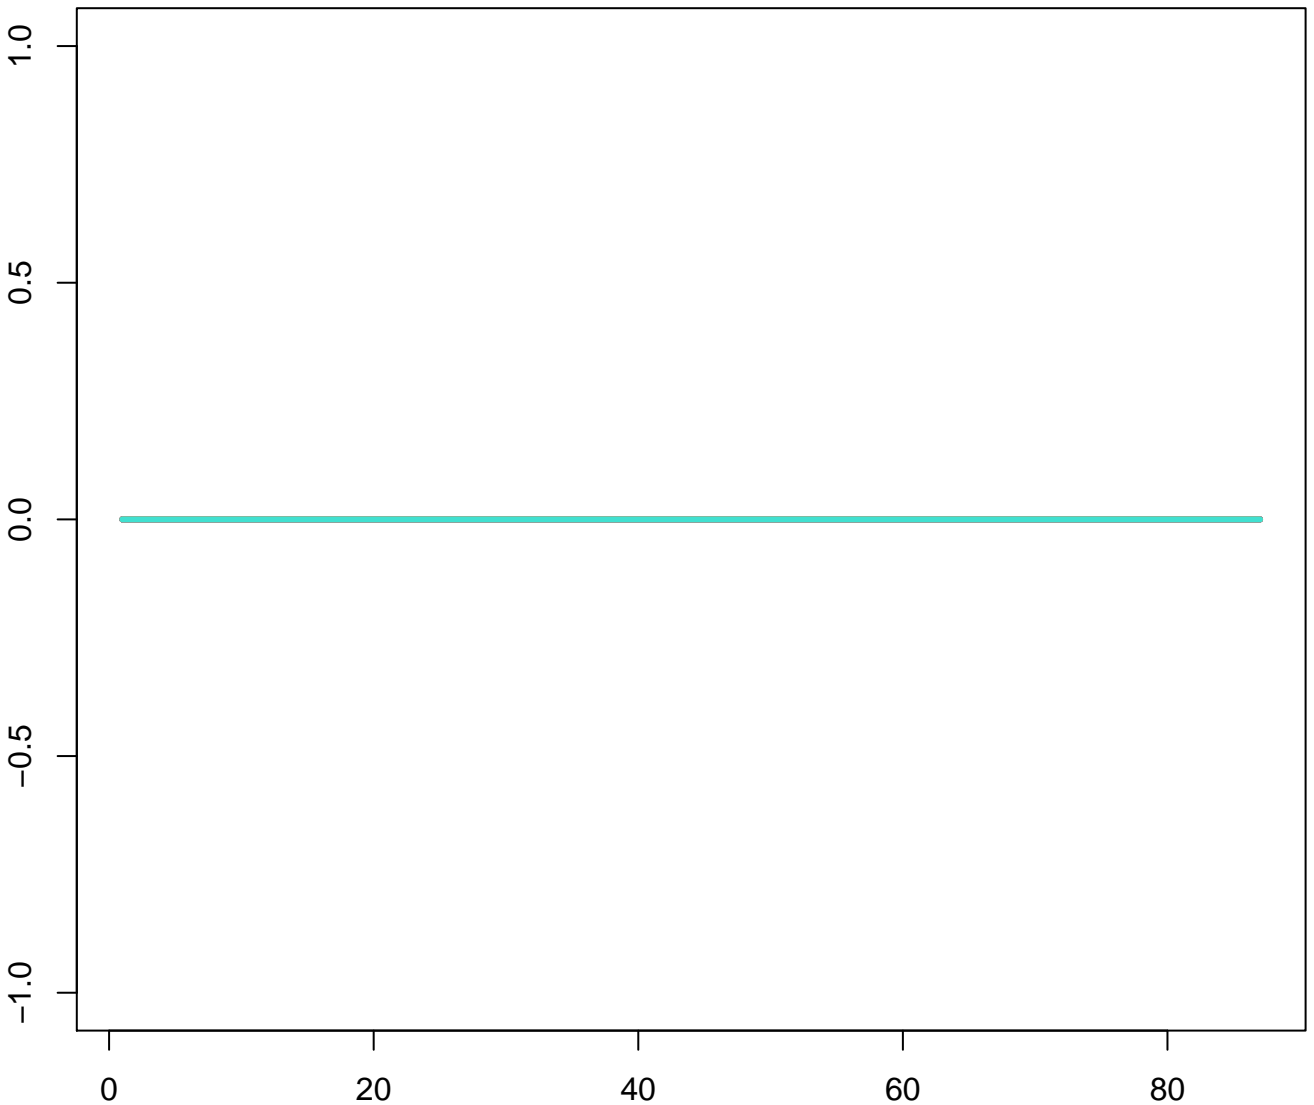

blood brain heart kidney lung ovary skin muscle testis



### 3\_58385089-58385229(-)\_cfa-mir-8900\_low

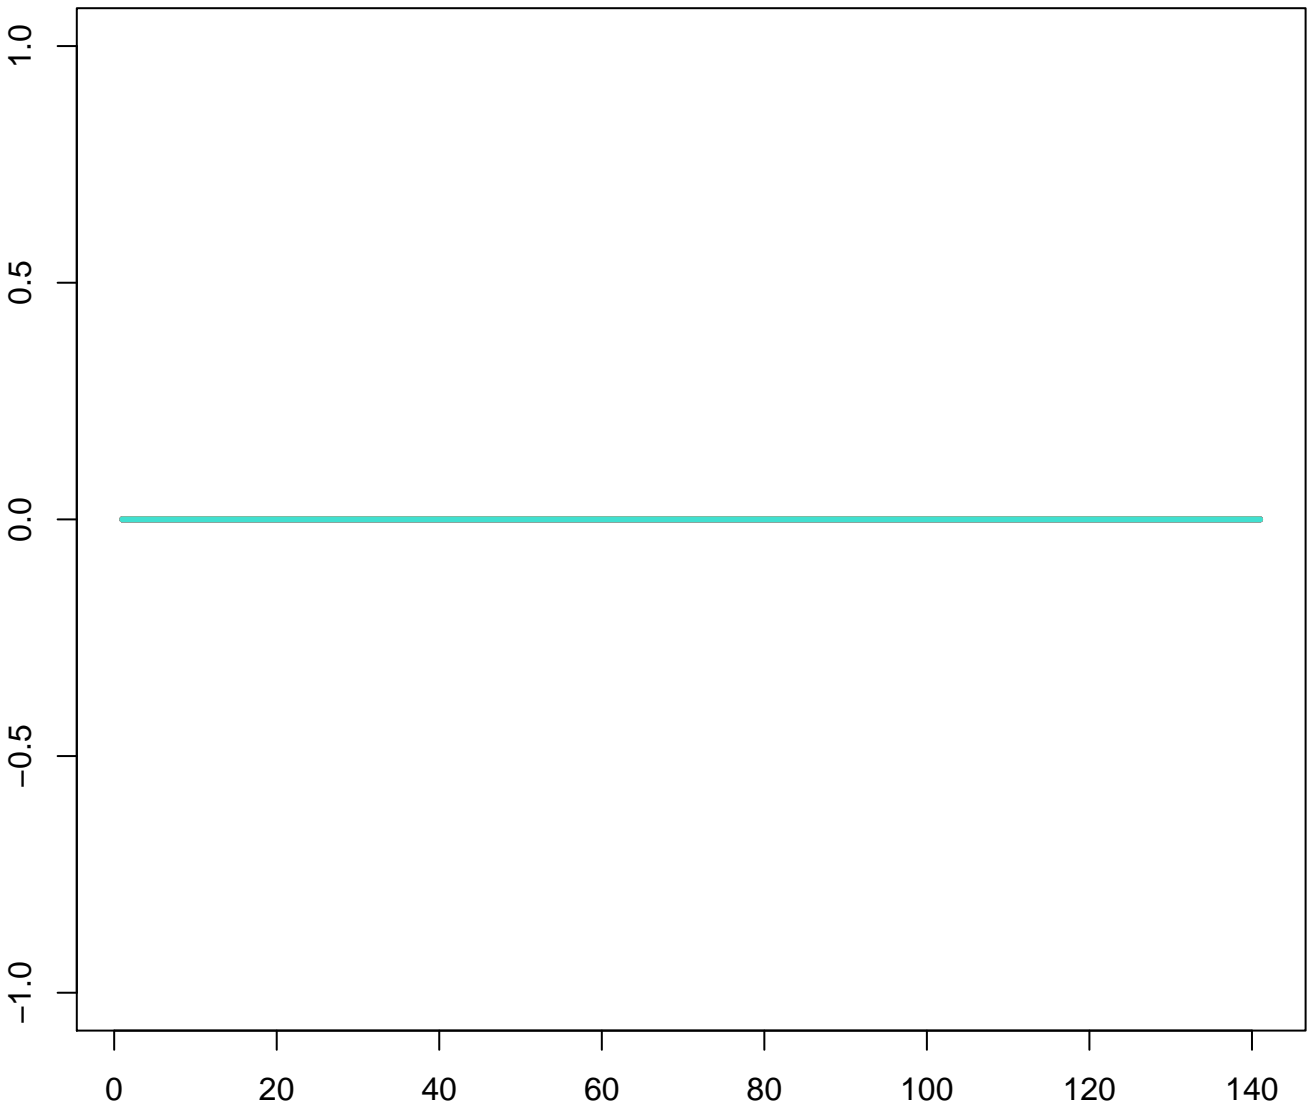

blood brain heart kidney lung ovary skin muscle testis

### 3\_59867521-59867601(-)\_cfa-mir-95\_high

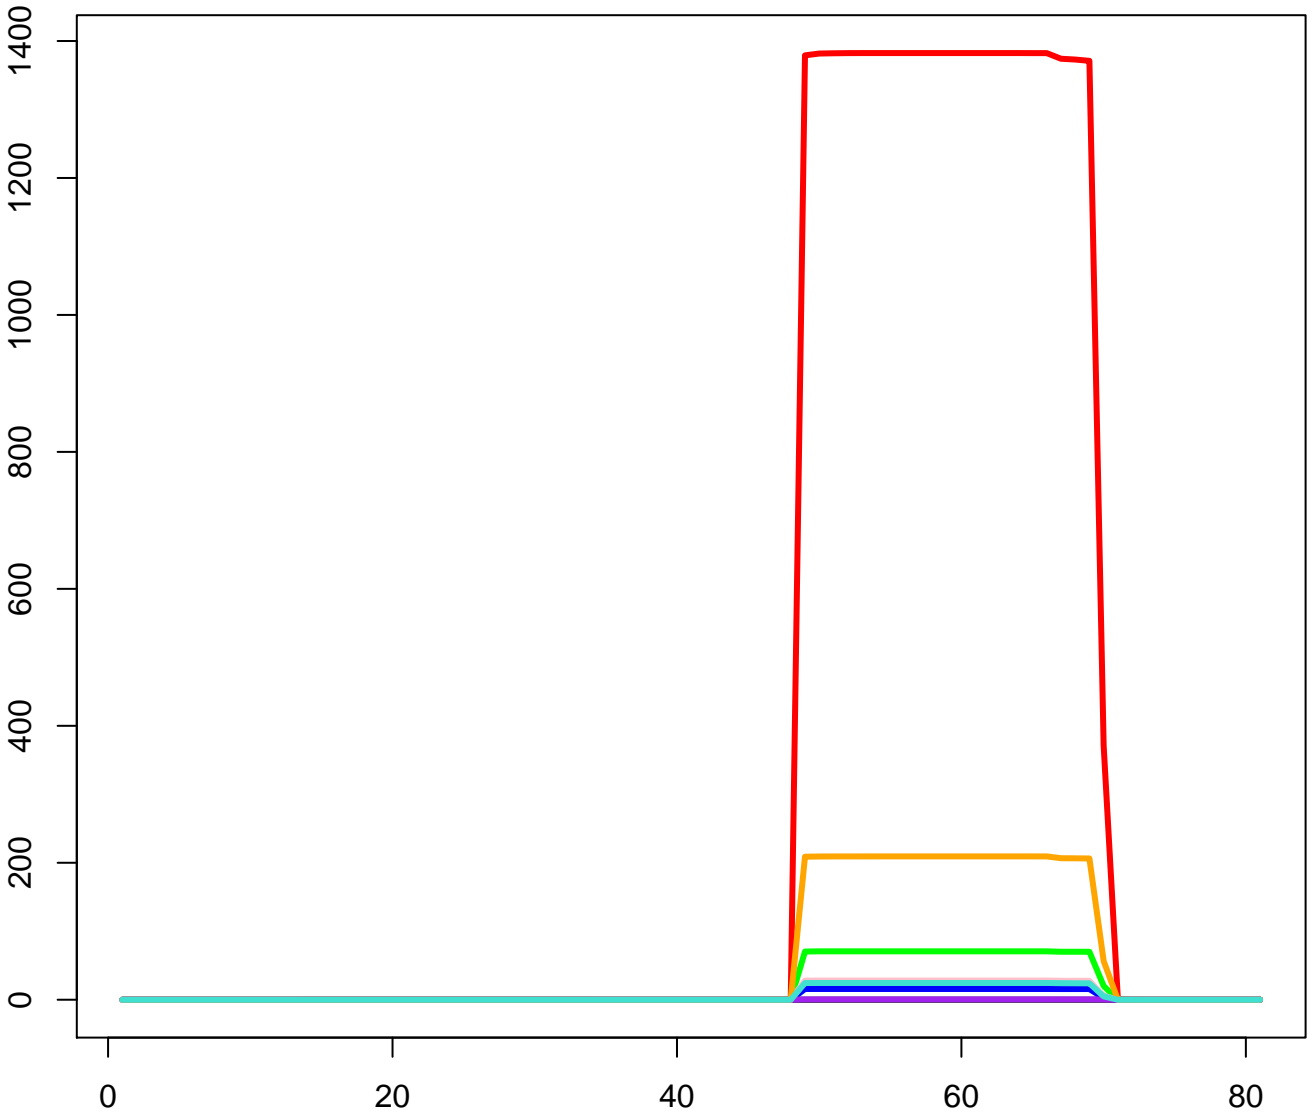

— blood — brain — heart — kidney — lung — ovary — skin — muscle — testis

### 3\_61939007-61939069(+)\_mir-4800\_low

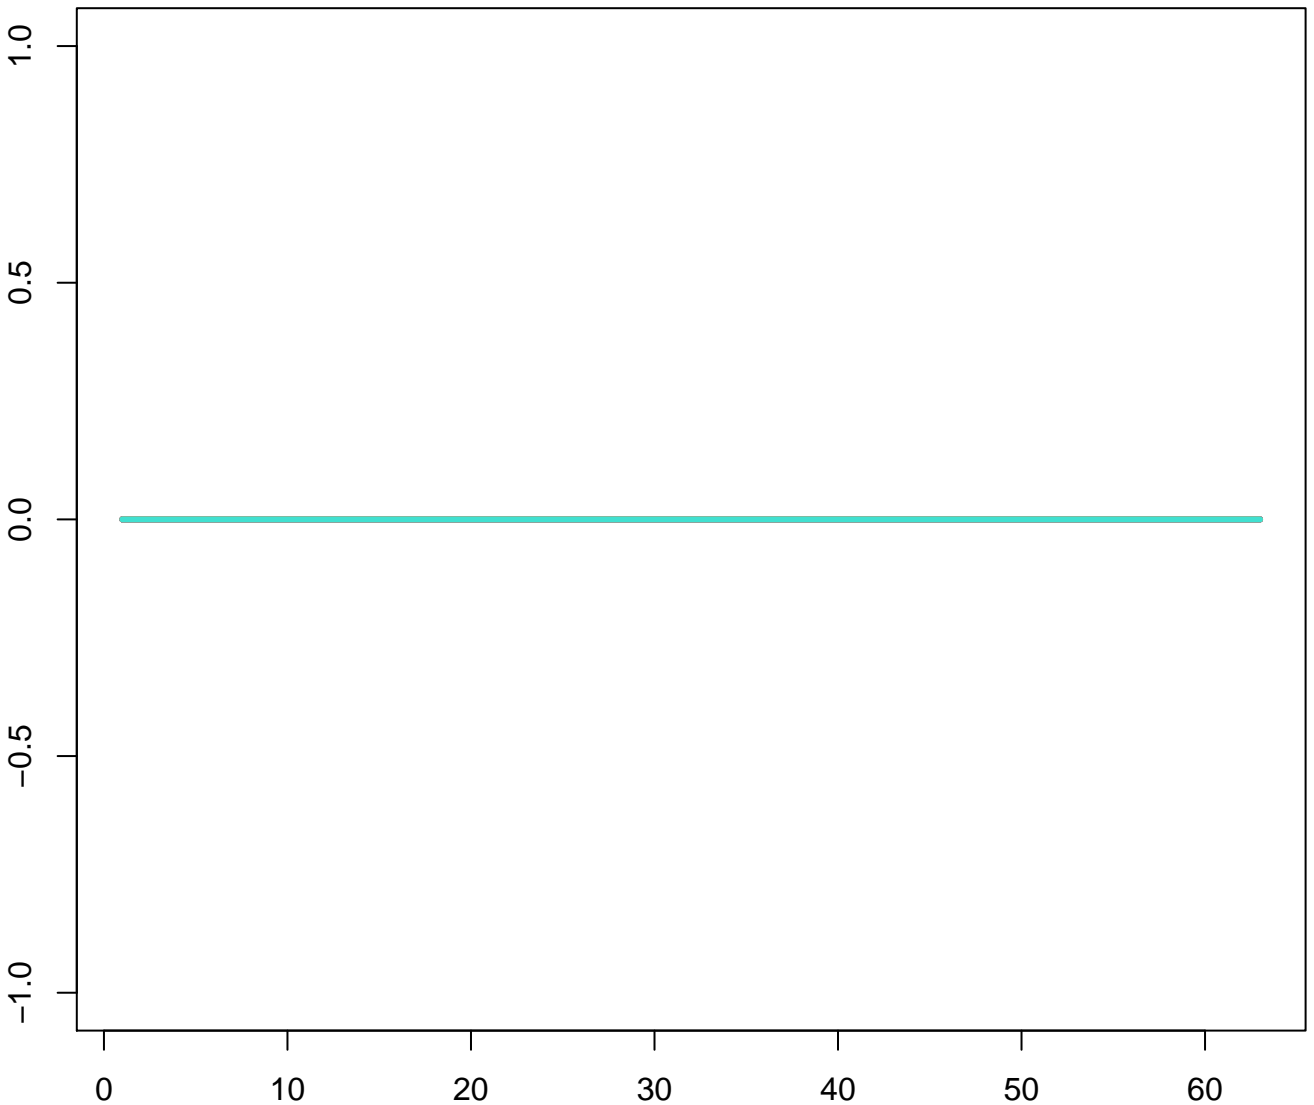

blood brain heart kidney lung ovary skin muscle testis

### 3\_63027413-63027493(+)\_mir-3533\_low

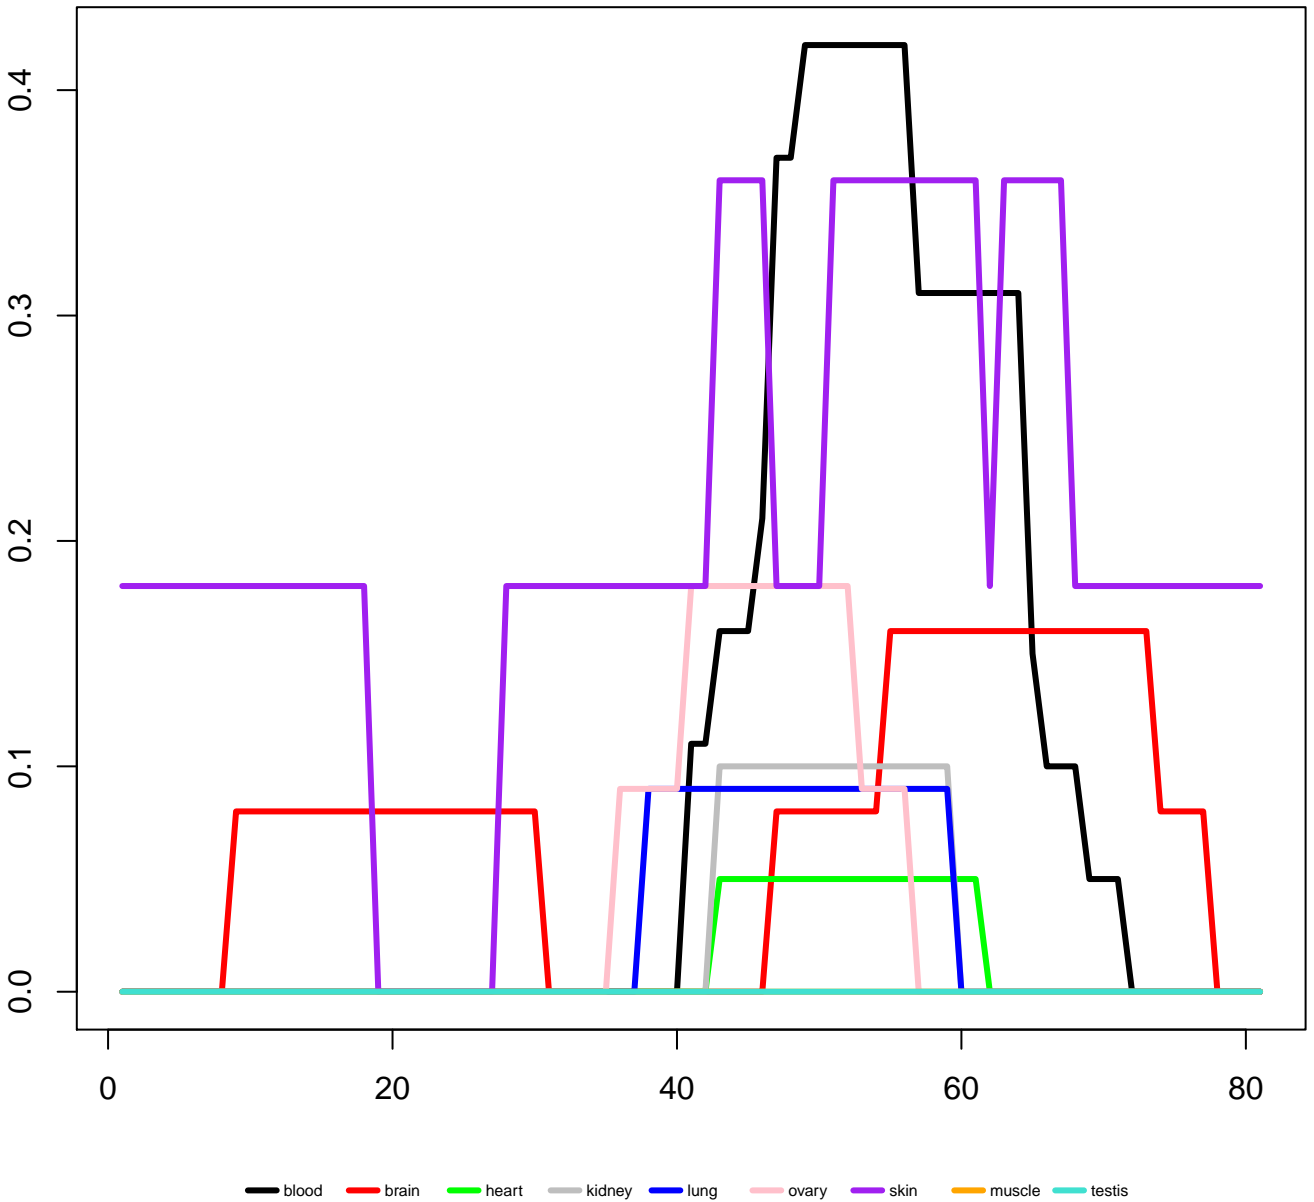



### 3\_73494062-73494119(-)\_cfa-mir-574\_high

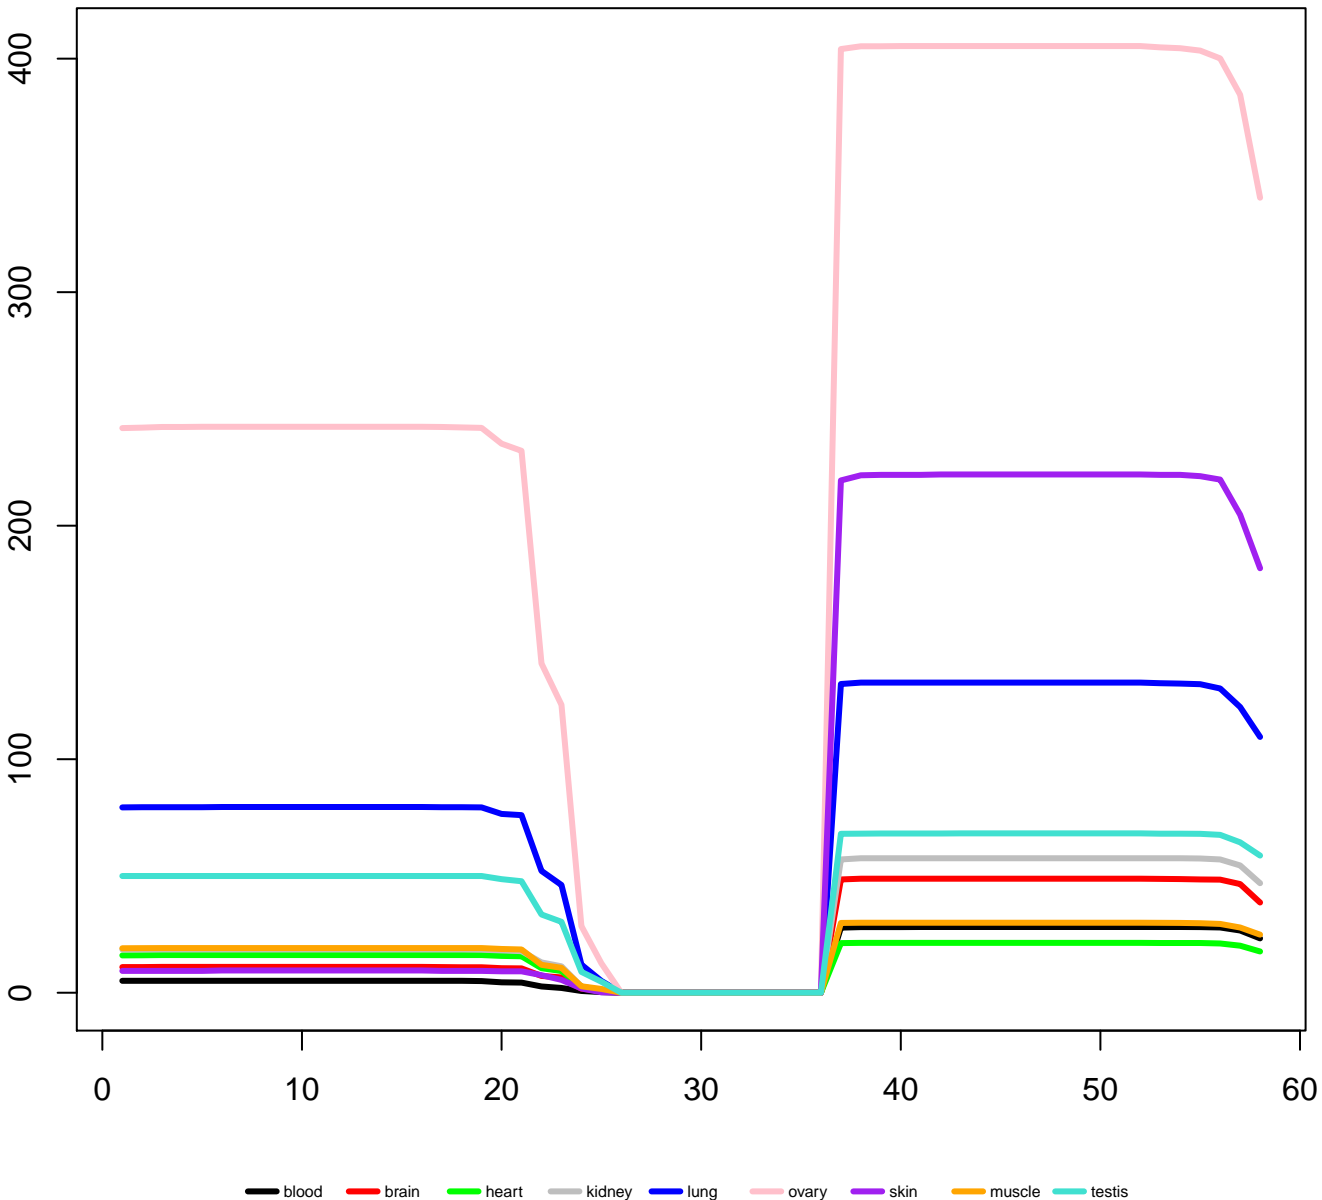

### 3\_82049047-82049114(-)\_mir-4275\_low

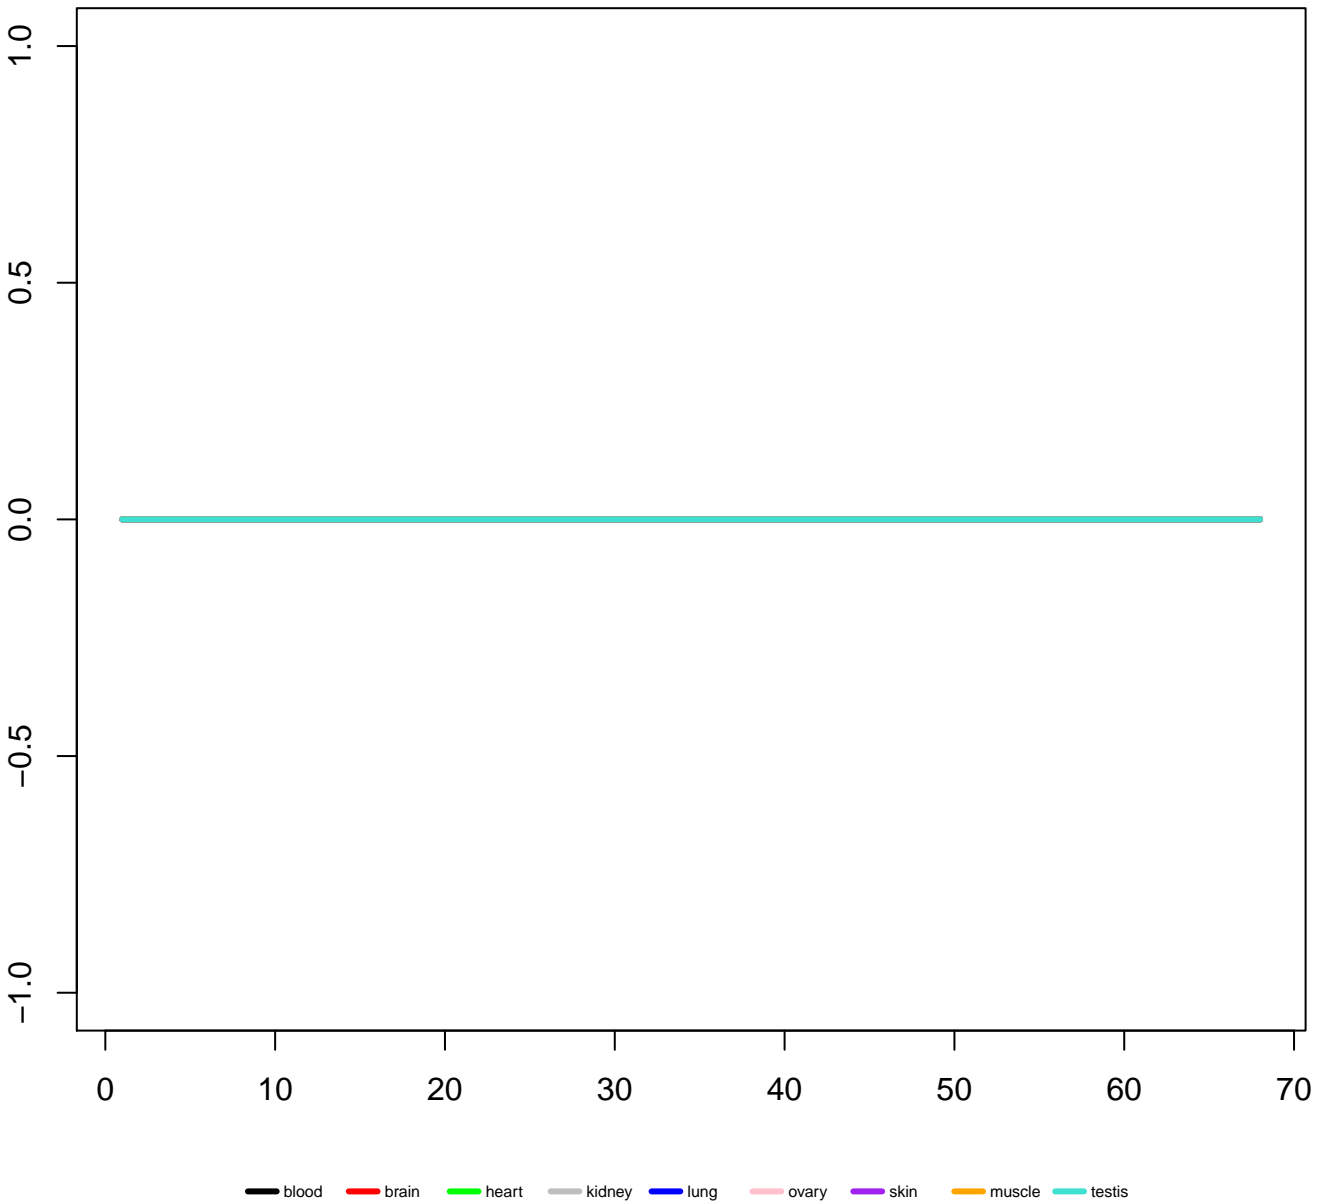

# 3\_89044709-89044772(-)\_cfa-mir-218-1\_high

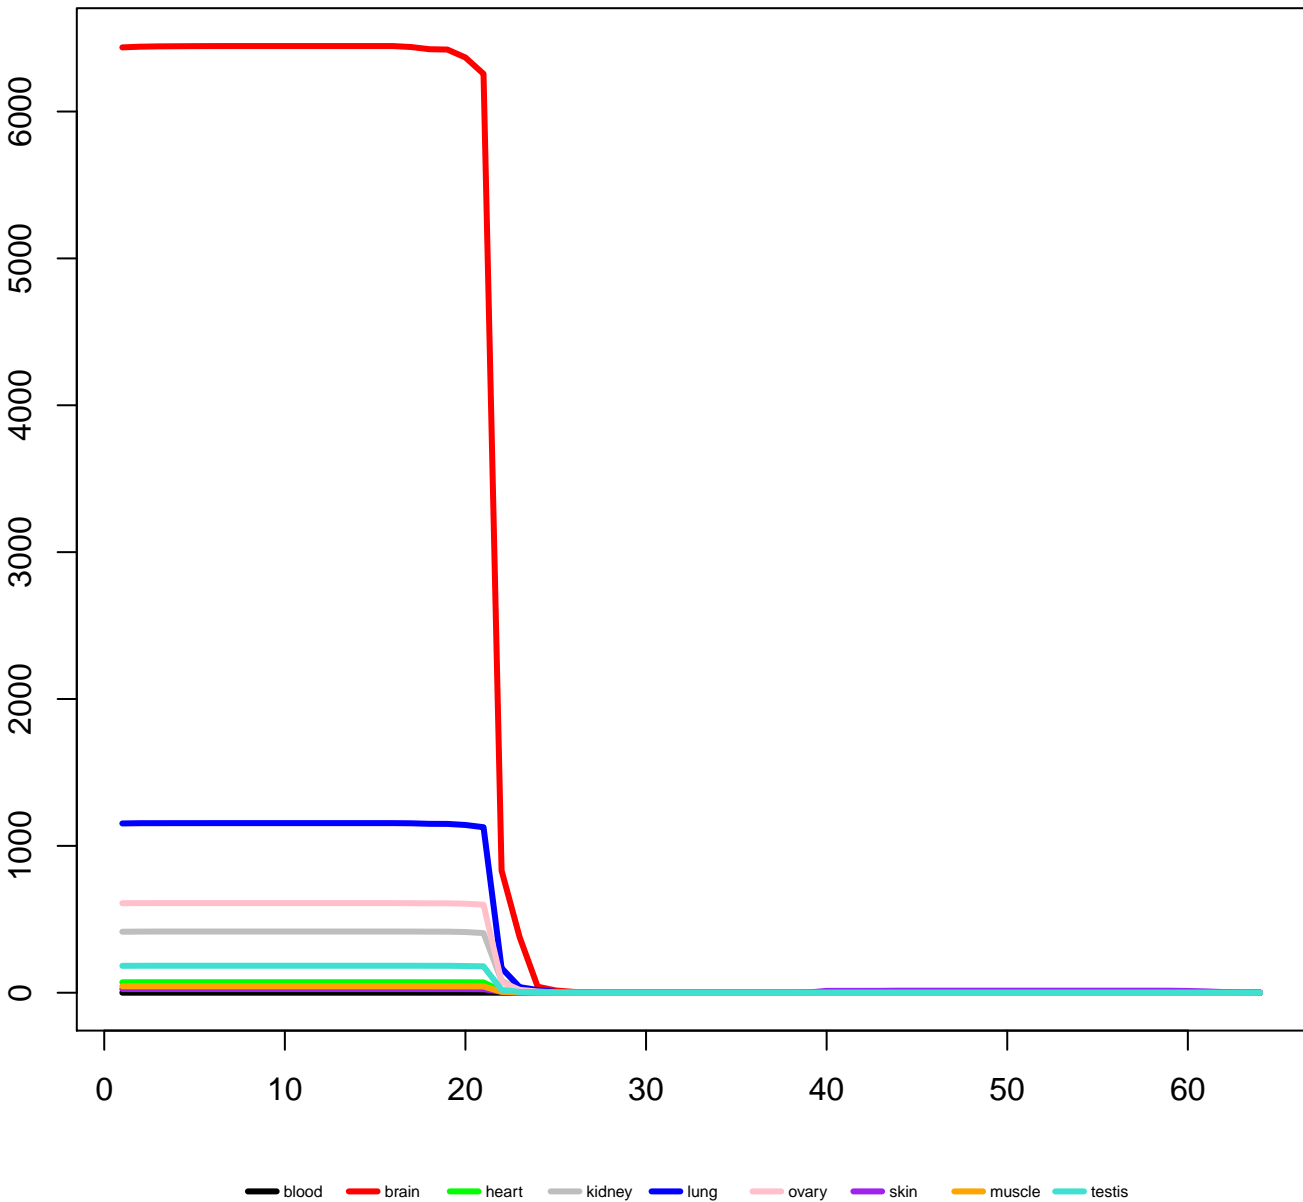

### 3\_91886956-91887076(+)\_cfa-mir-8899\_low

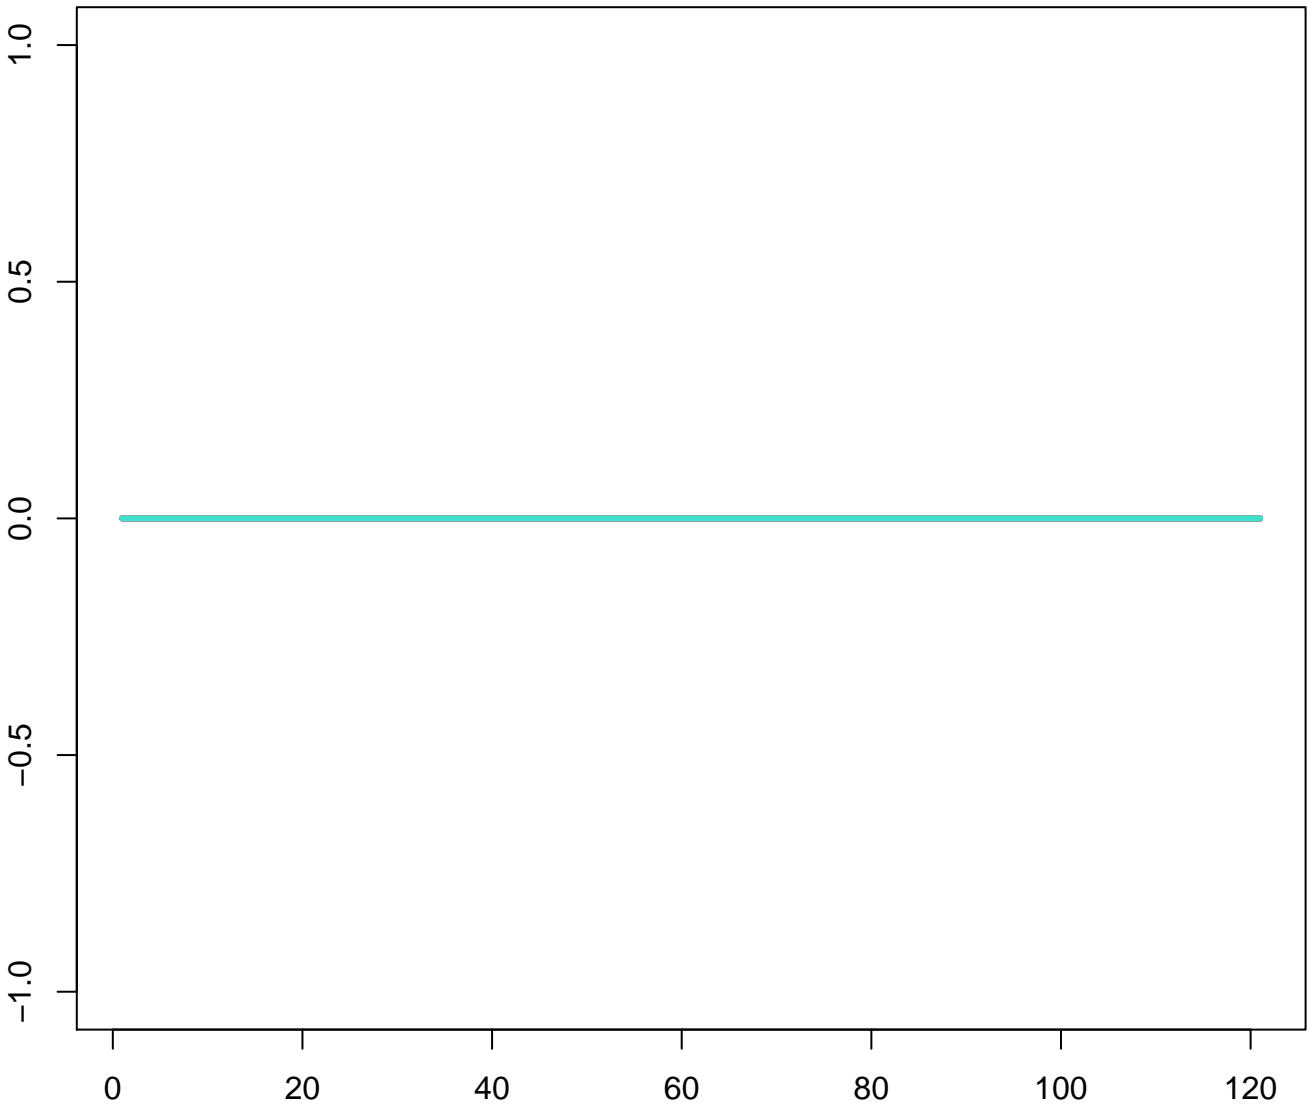

blood brain heart kidney lung ovary skin muscle testis

# 30\_3219341-3219485(-)\_cfa-mir-8792\_low

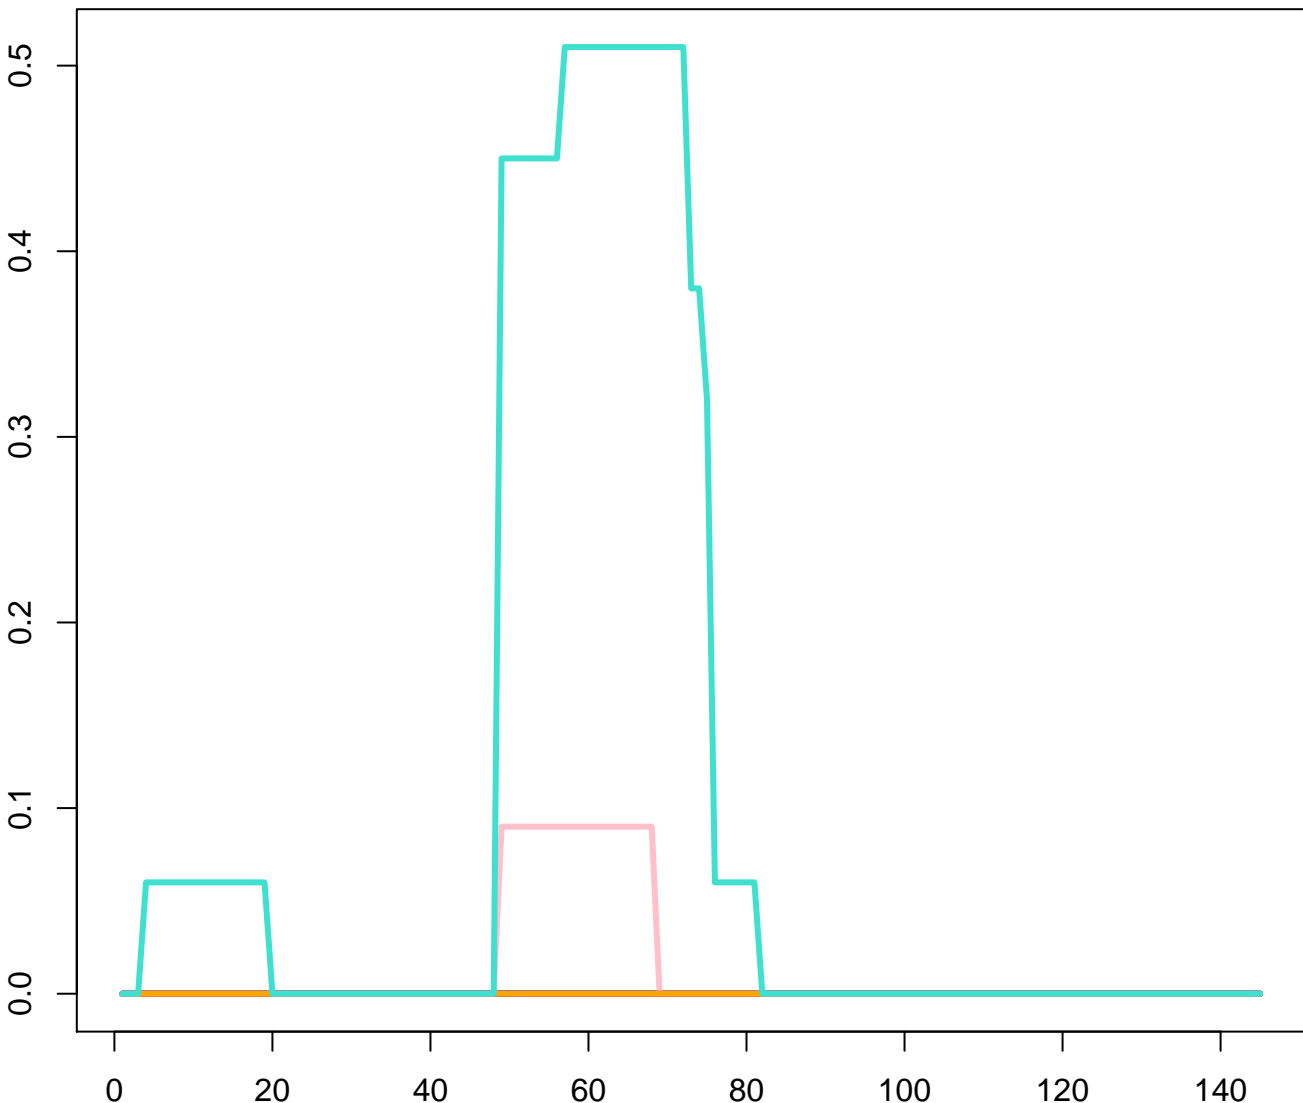

blood brain heart kidney lung ovary skin muscle testis

# 30\_10022251-10022323(-)\_mir-9838\_low

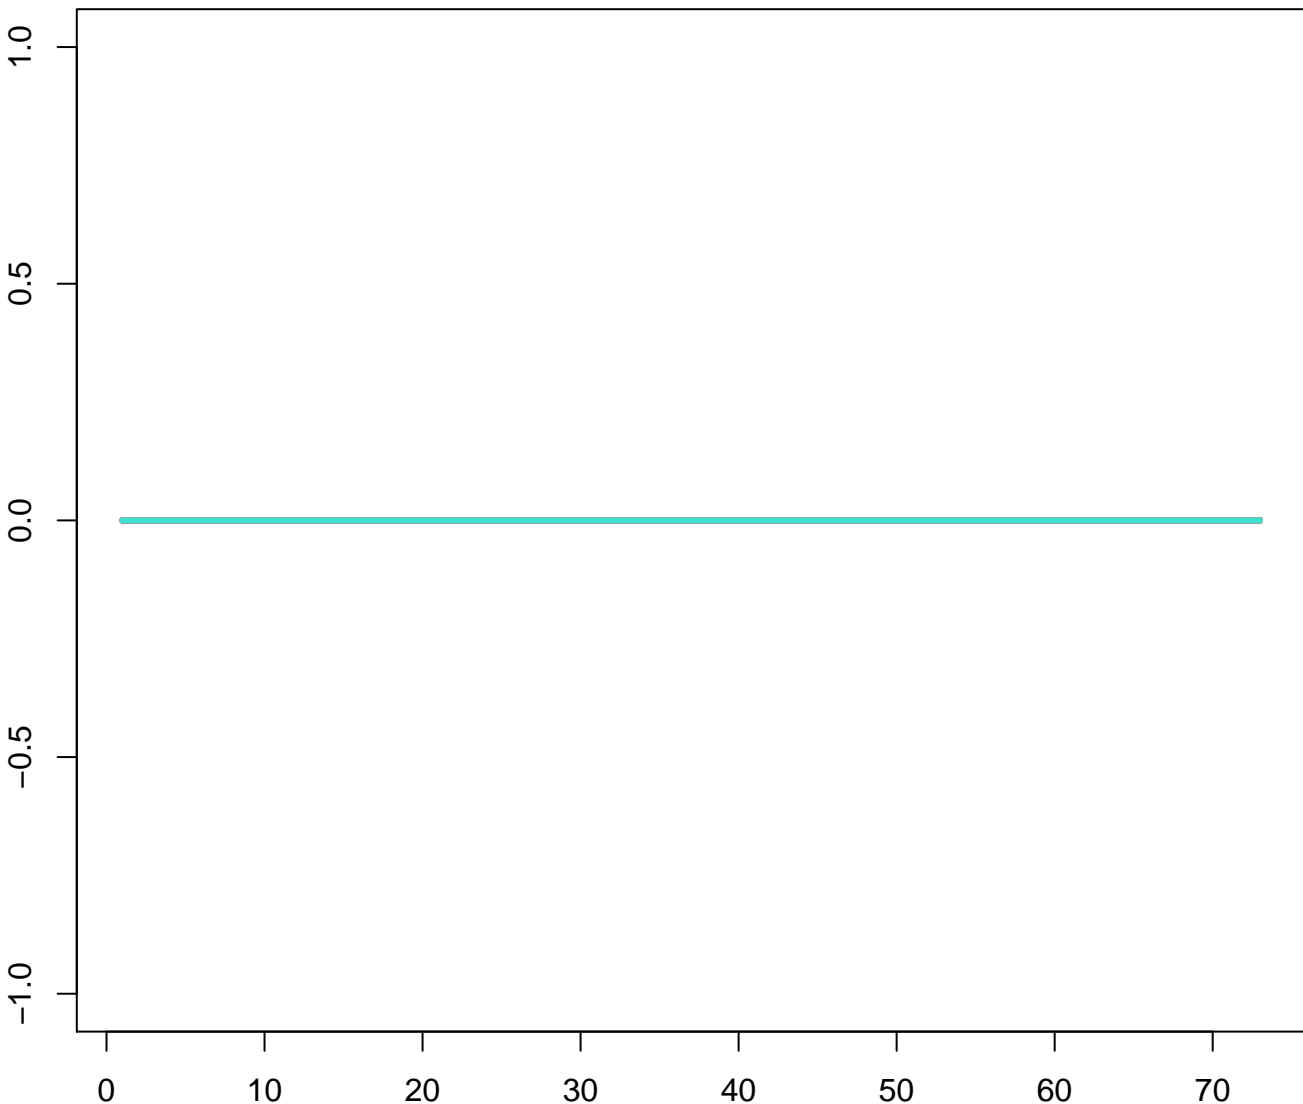

blood brain heart kidney lung ovary skin muscle testis

# 30\_10536862-10536962(-)\_mir-1282\_low

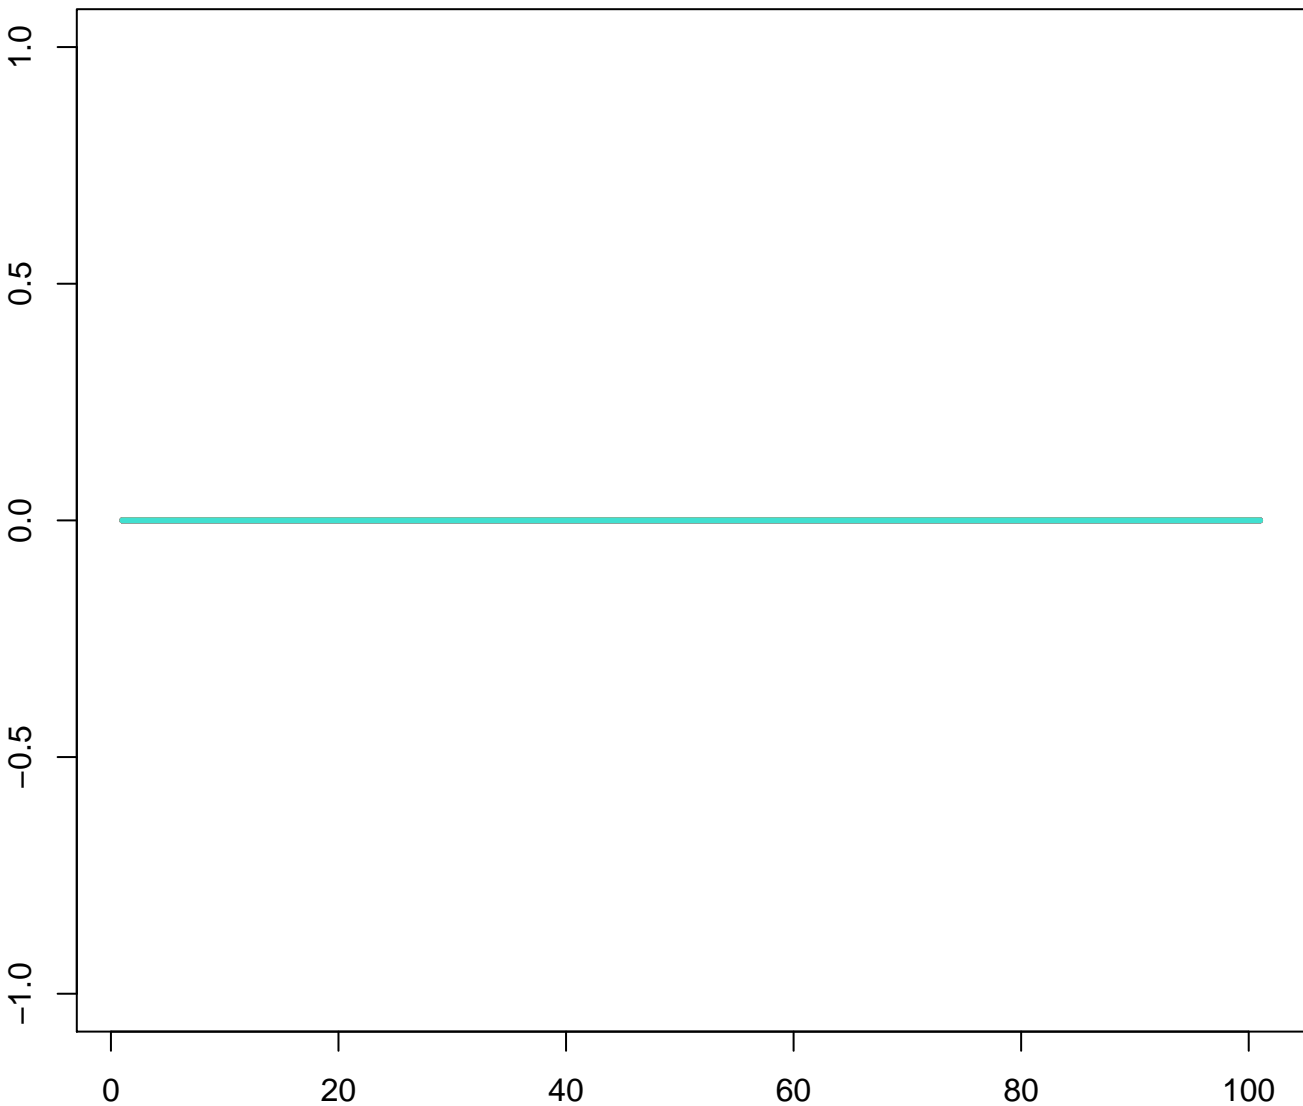

blood brain heart kidney lung ovary skin muscle testis

# 30\_11800621-11800706(+)\_cfa-mir-147\_high

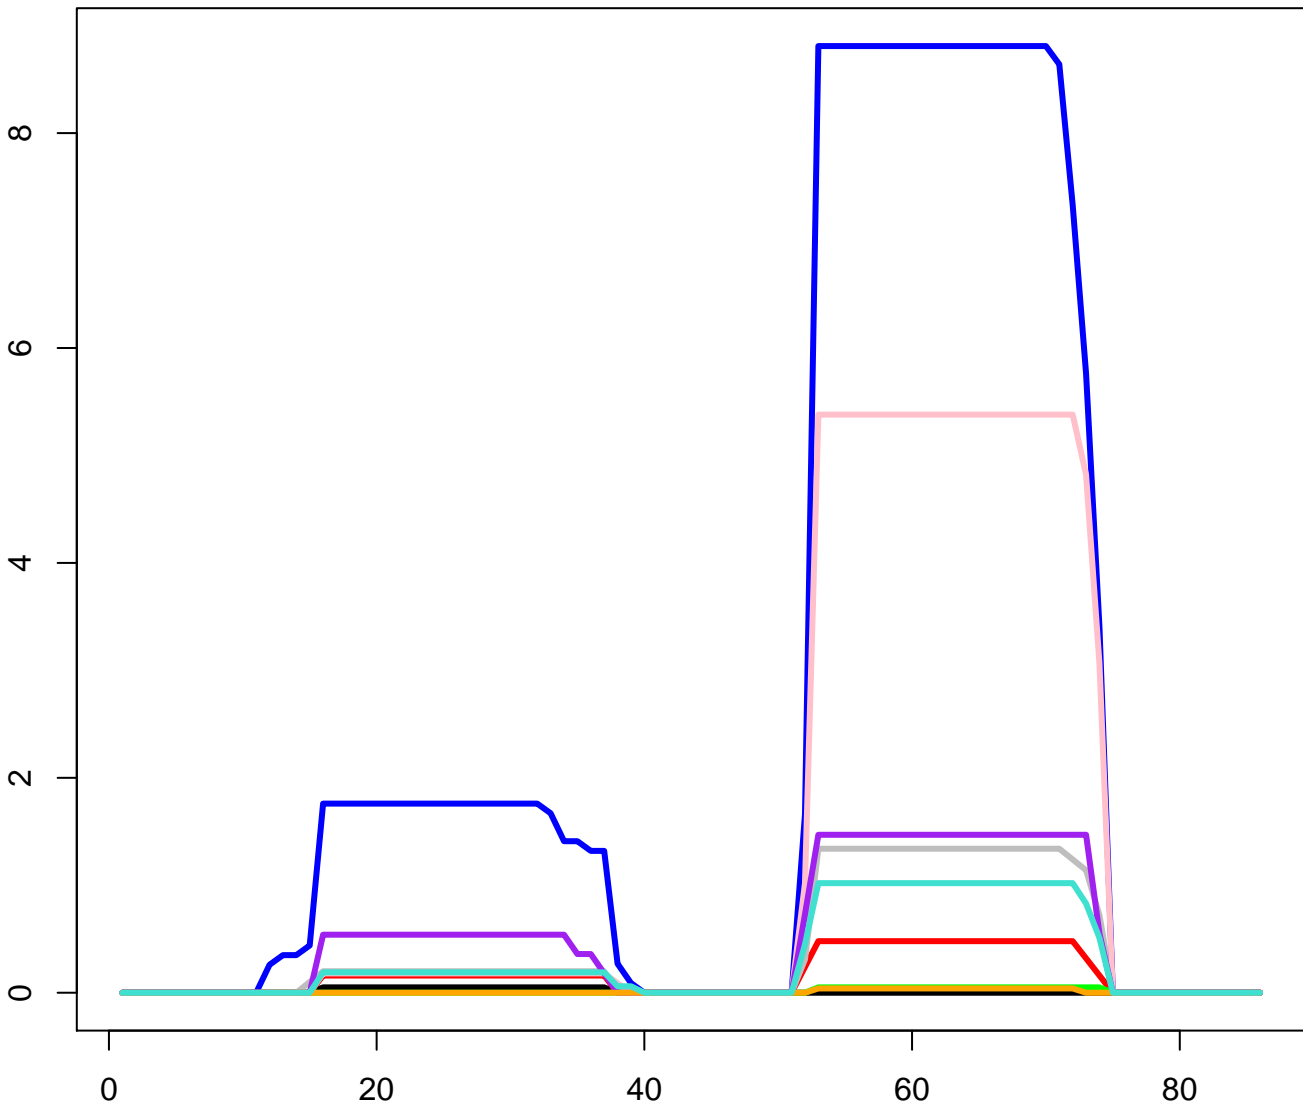

— blood — brain — heart — kidney — lung — ovary — skin — muscle — testis



# 30\_16018399-16018543(-)\_cfa-mir-8791a\_low

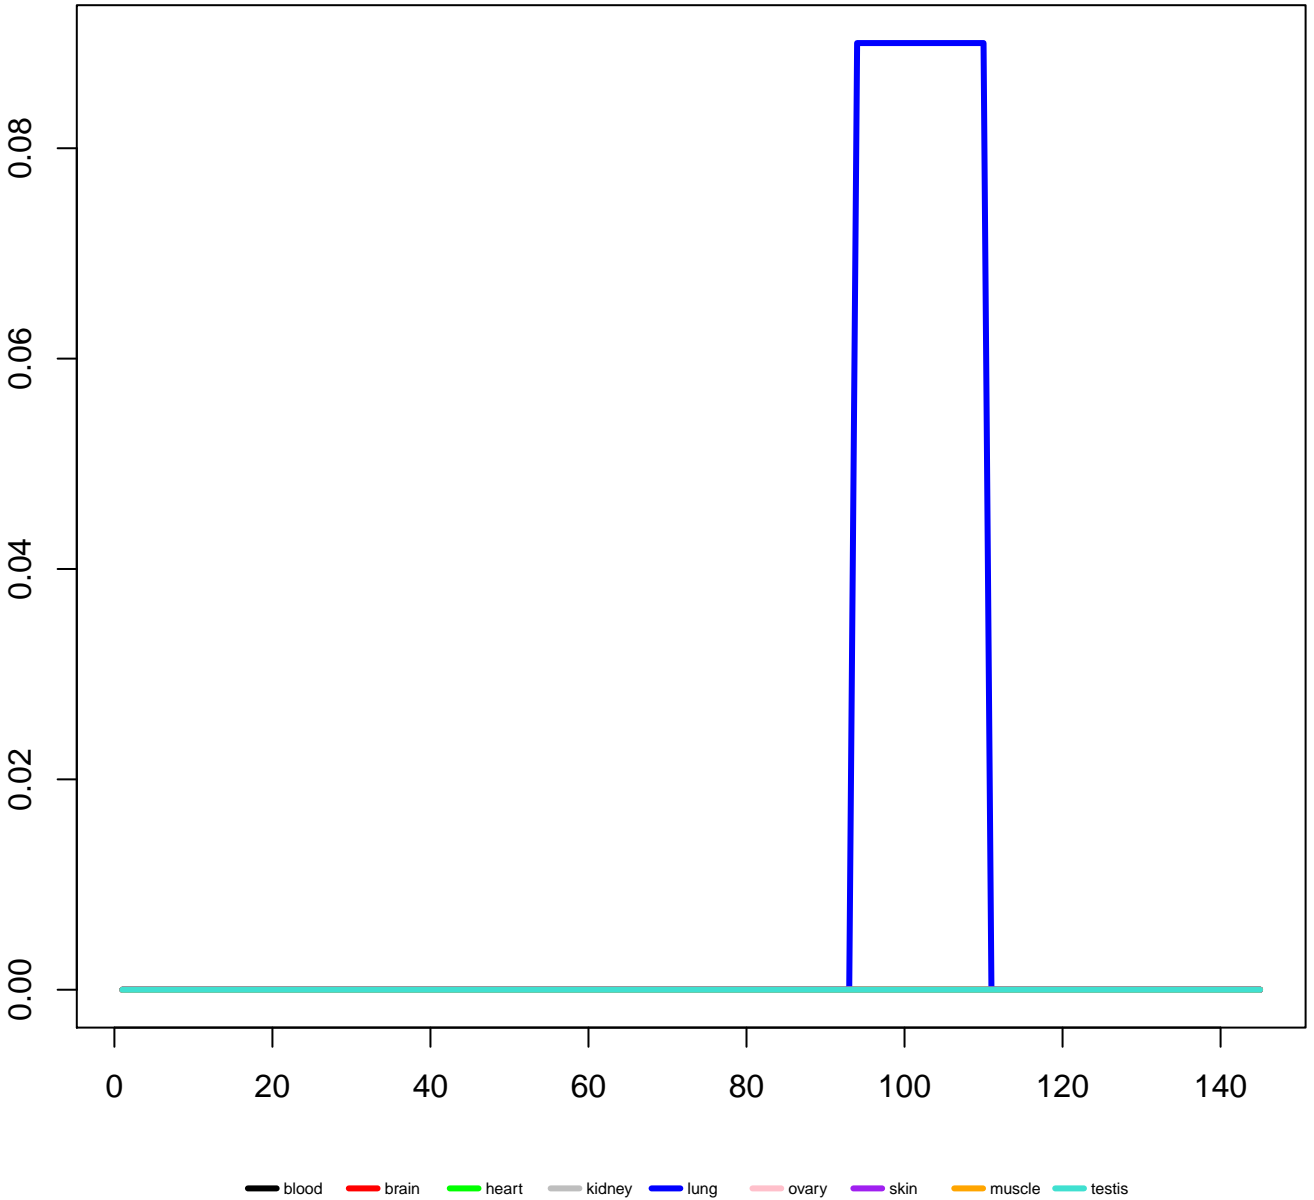

# 30\_20769709-20769803(-)\_cfa-mir-628\_high

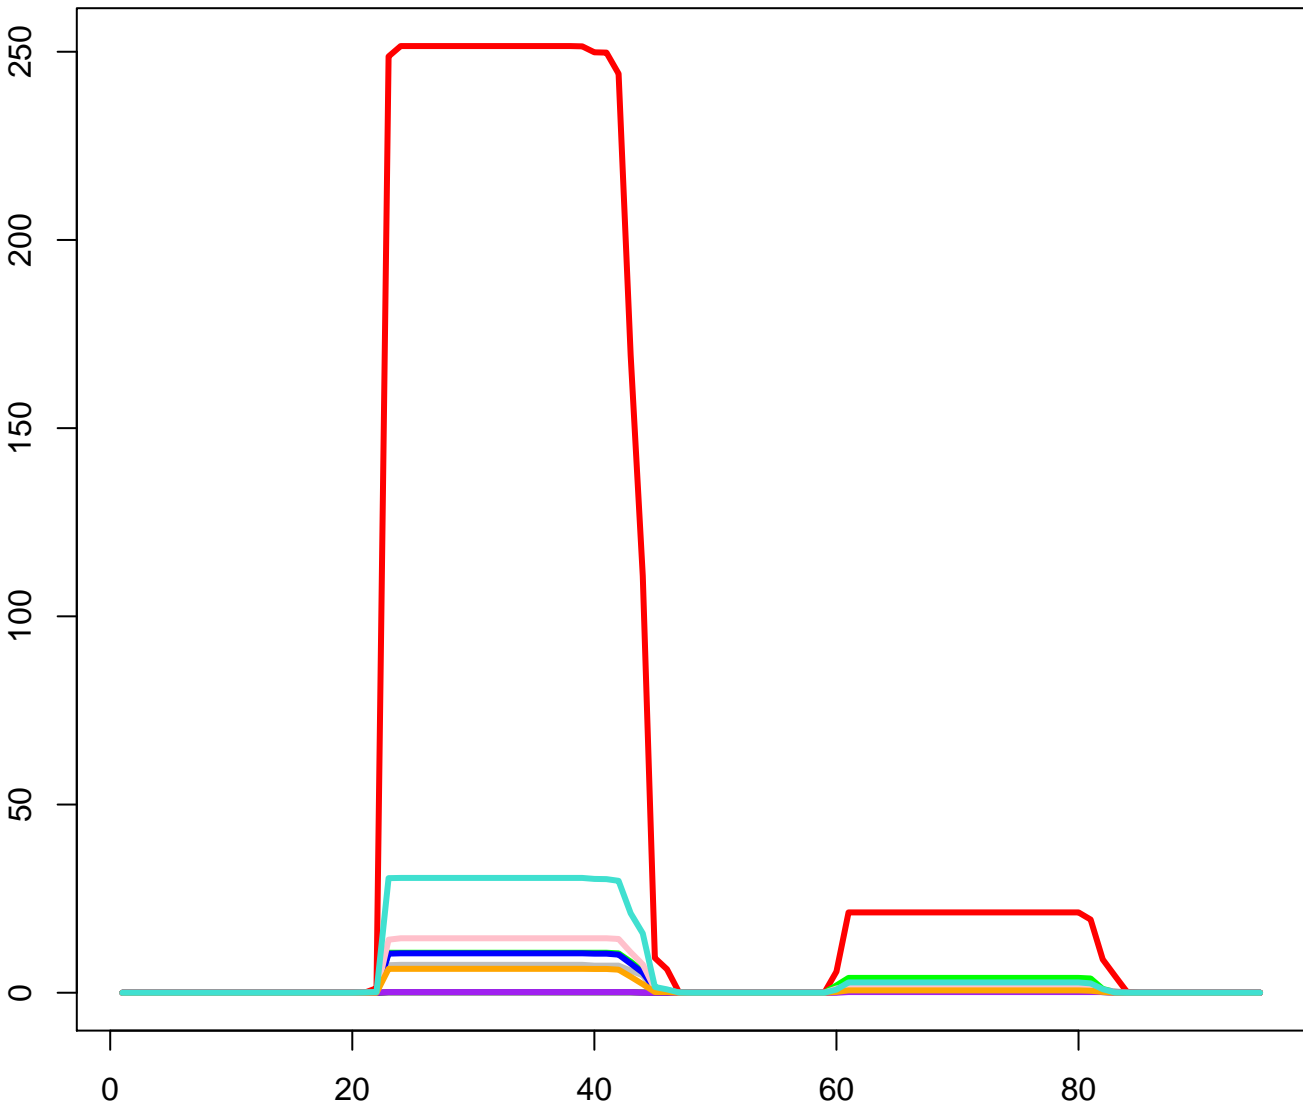

— blood — brain — heart — kidney — lung — ovary — skin — muscle — testis



# 30\_38216543-38216610(-)\_cfa-mir-631\_low

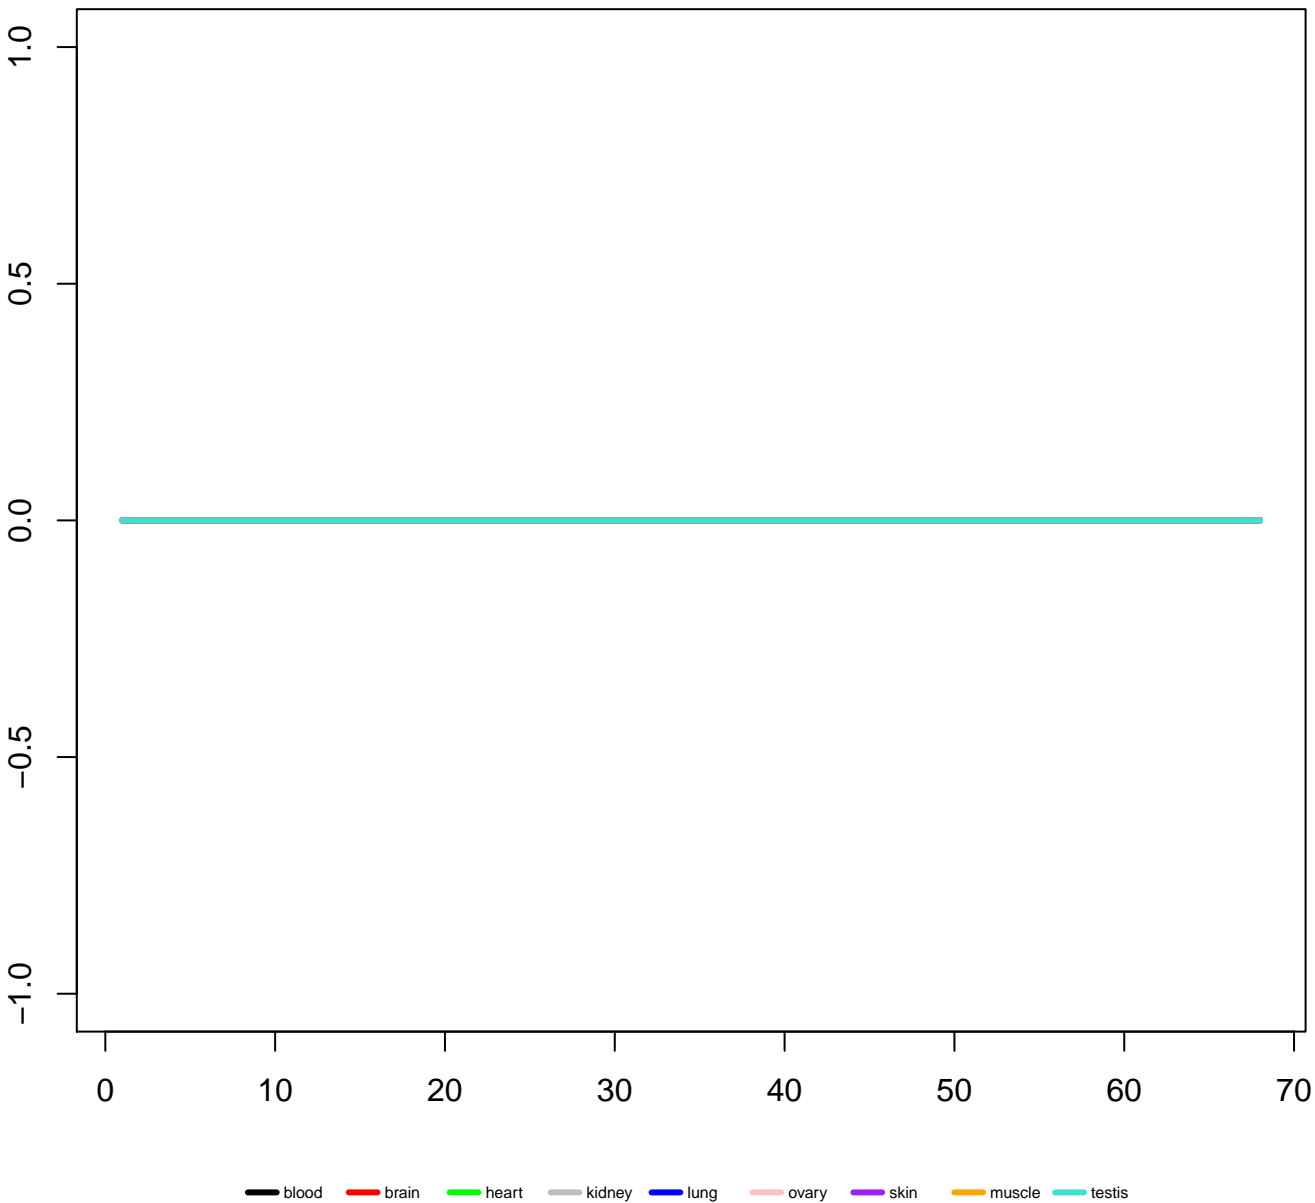

# 31\_13258782-13258840(+)\_cfa-mir-99a-1\_high

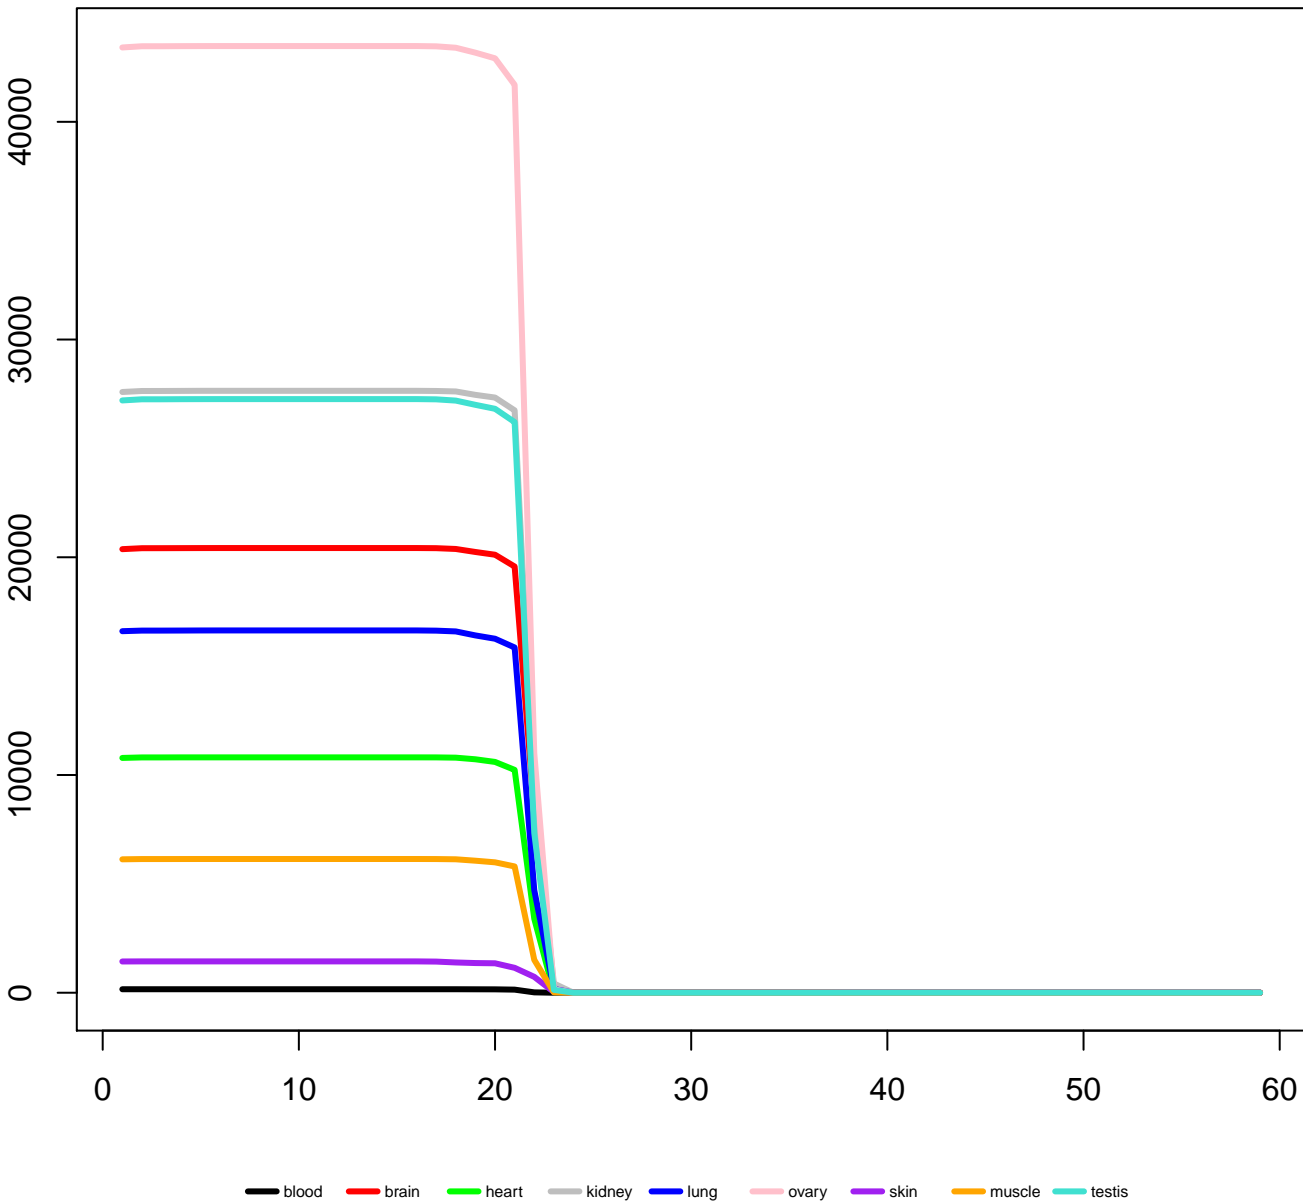











# 31\_28172857-28172923(+)\_mir-6501\_low

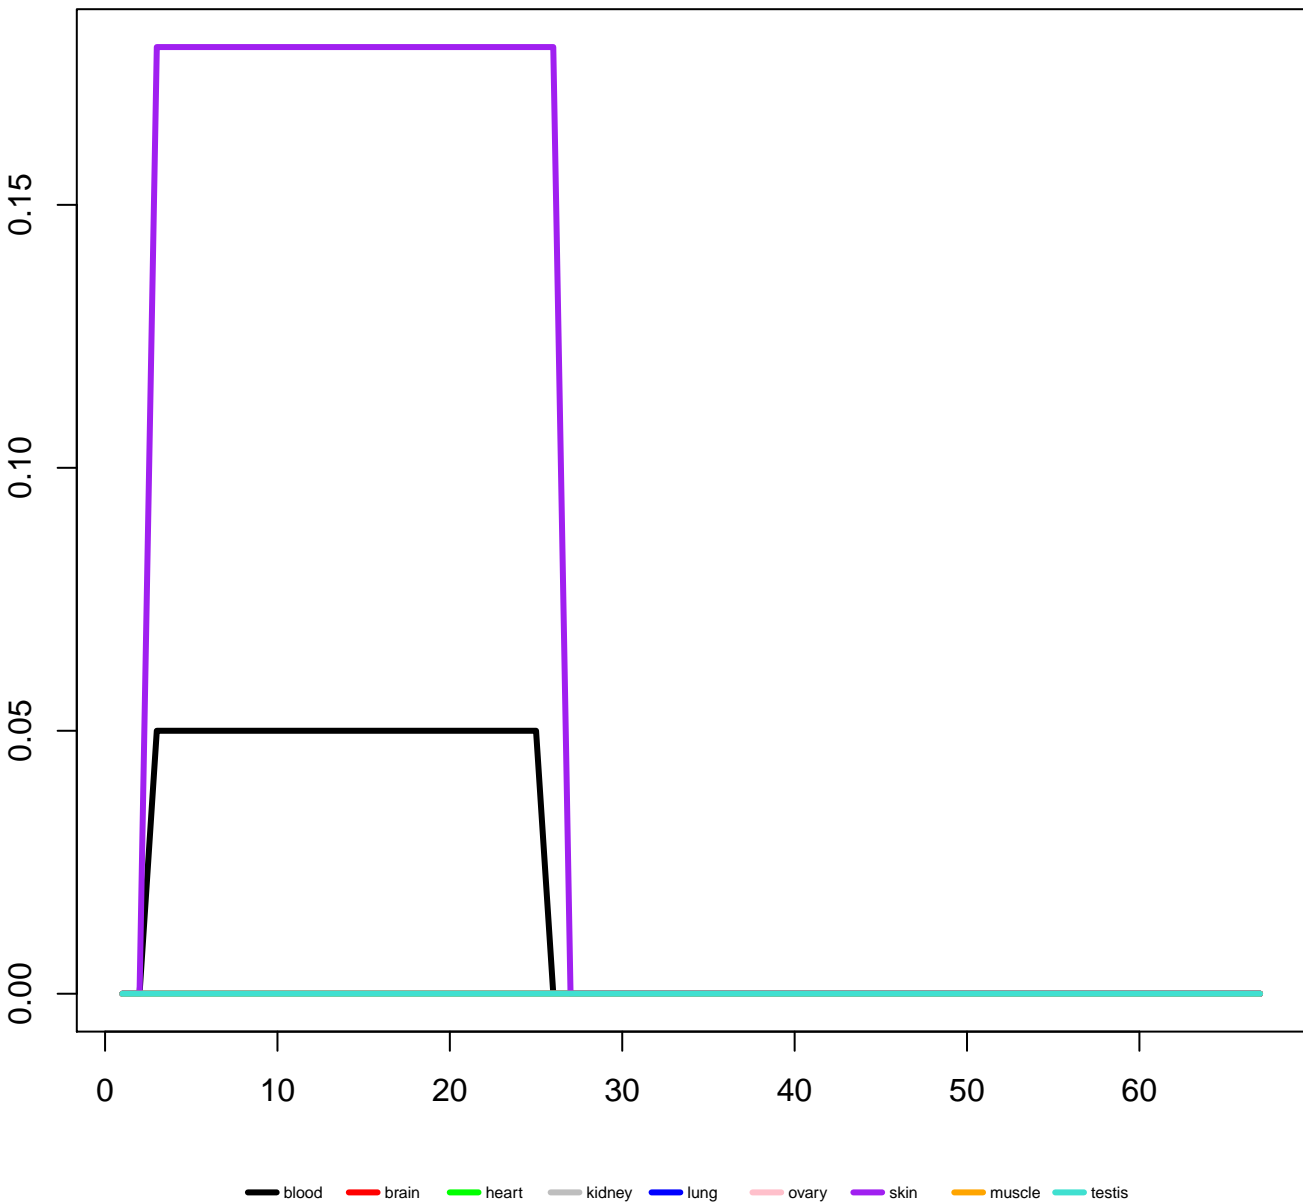

# 31\_29071706-29071772(+)\_mir-6501\_low





# 32\_21108324-21108383(-)\_mir-1956\_low

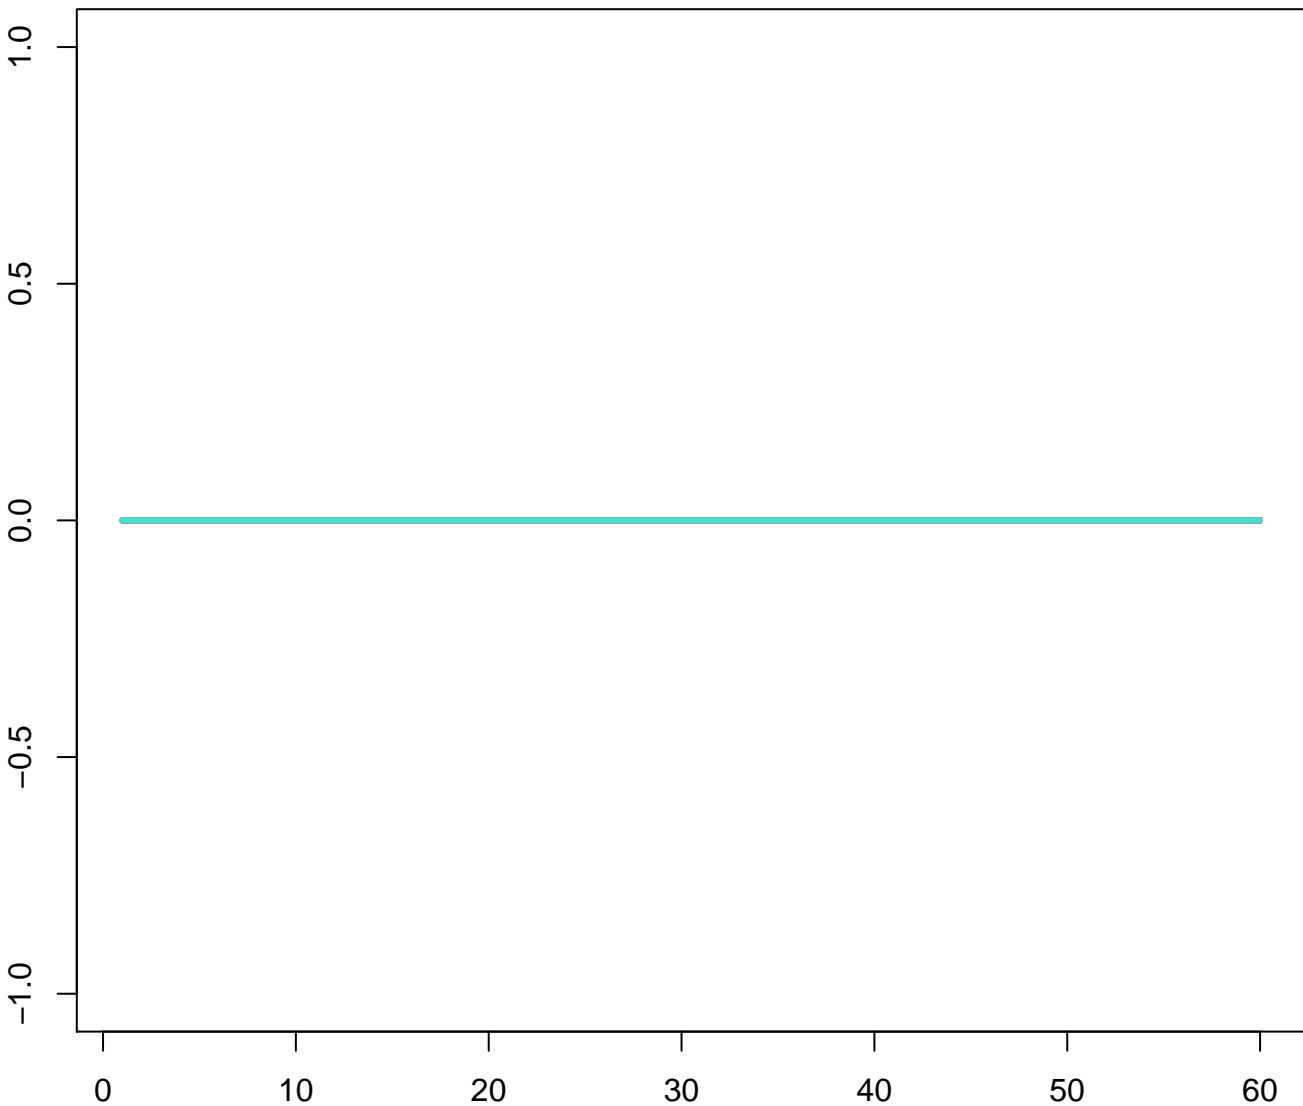

blood brain heart kidney lung ovary skin muscle testis

# 32\_32428905-32428972(-)\_cfa-mir-367\_low

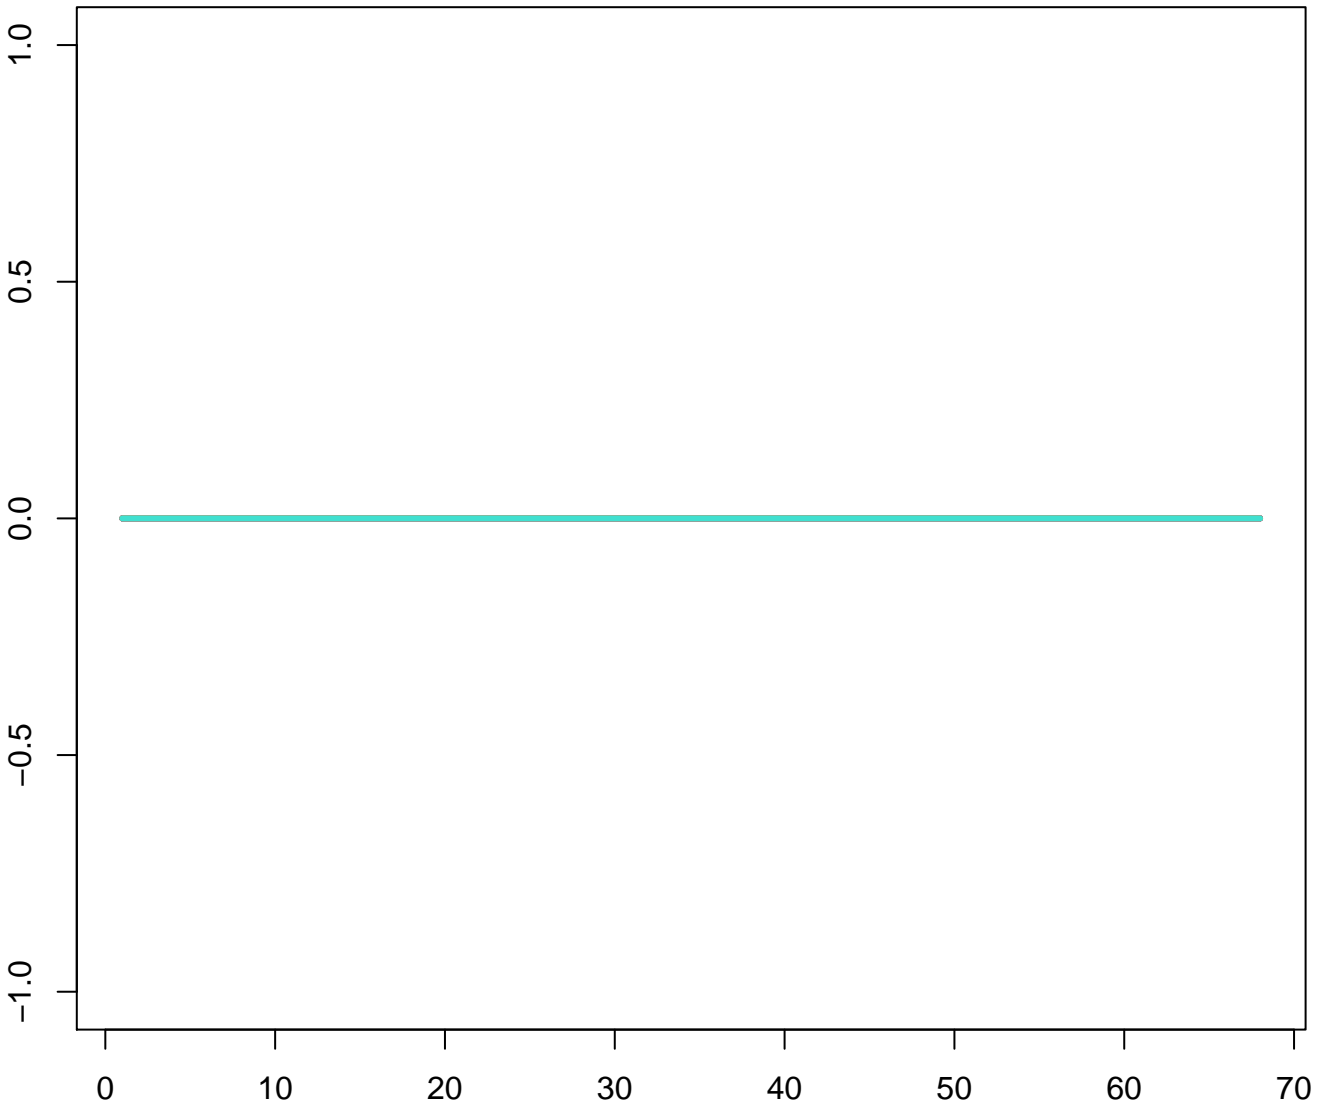

blood brain heart kidney lung ovary skin muscle testis

# 32\_32429032-32429101(-)\_cfa-mir-302d\_low

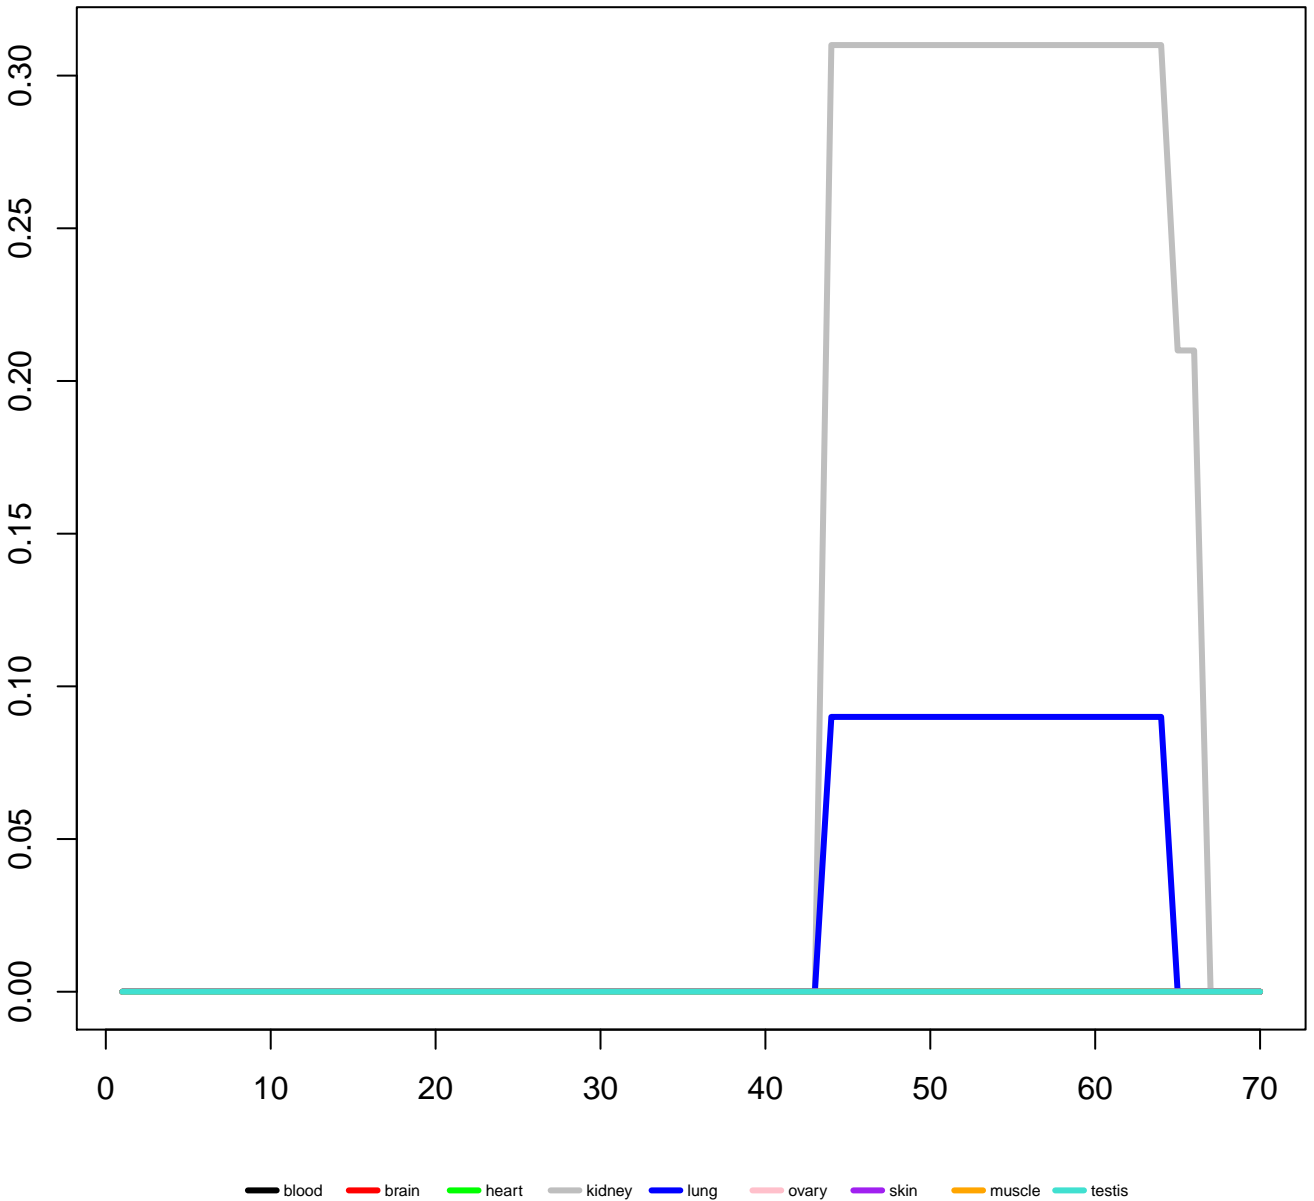

# 32\_32429209-32429277(-)\_cfa-mir-302a\_high

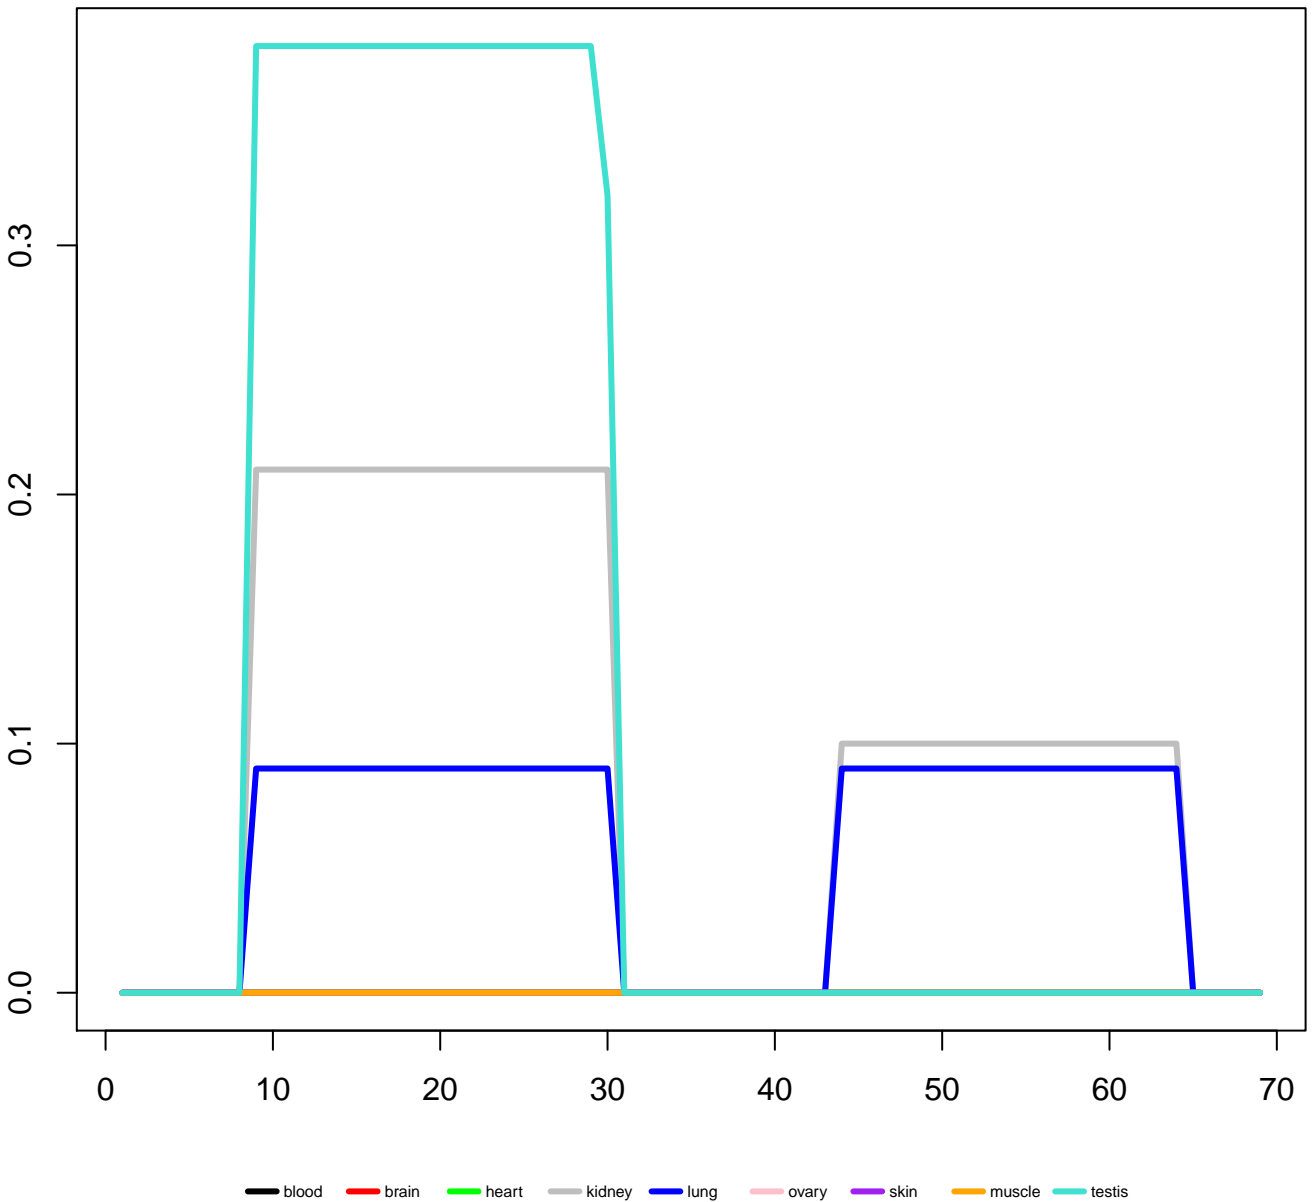



# 32\_32429366-32429433(-)\_cfa-mir-302c\_low

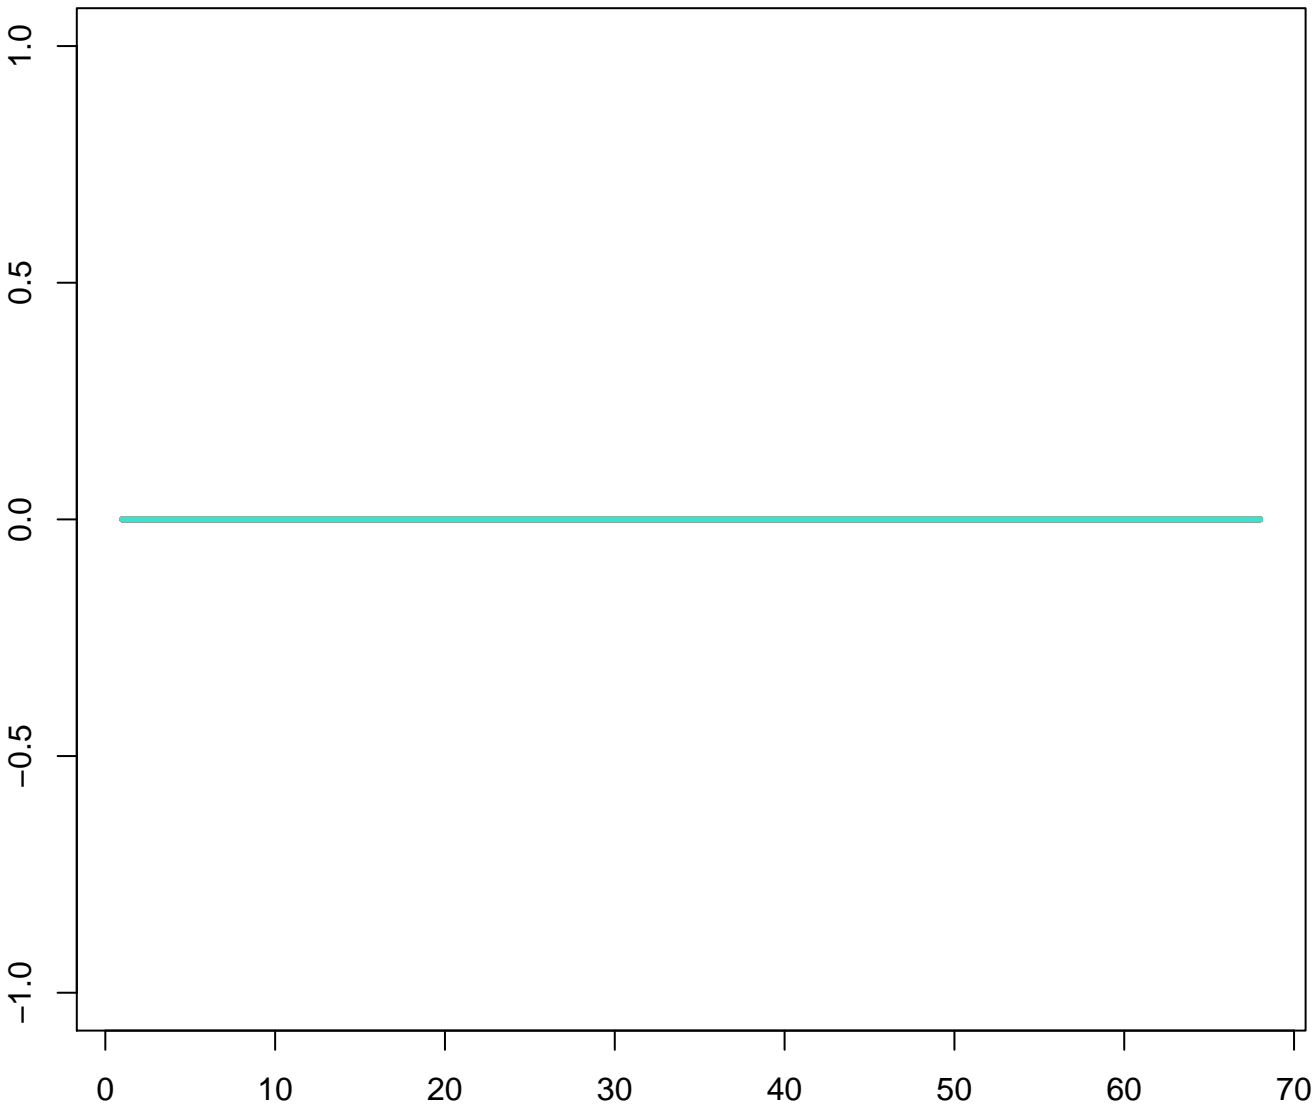

blood brain heart kidney lung ovary skin muscle testis

# 32\_32429500-32429574(-)\_cfa-mir-302b\_low

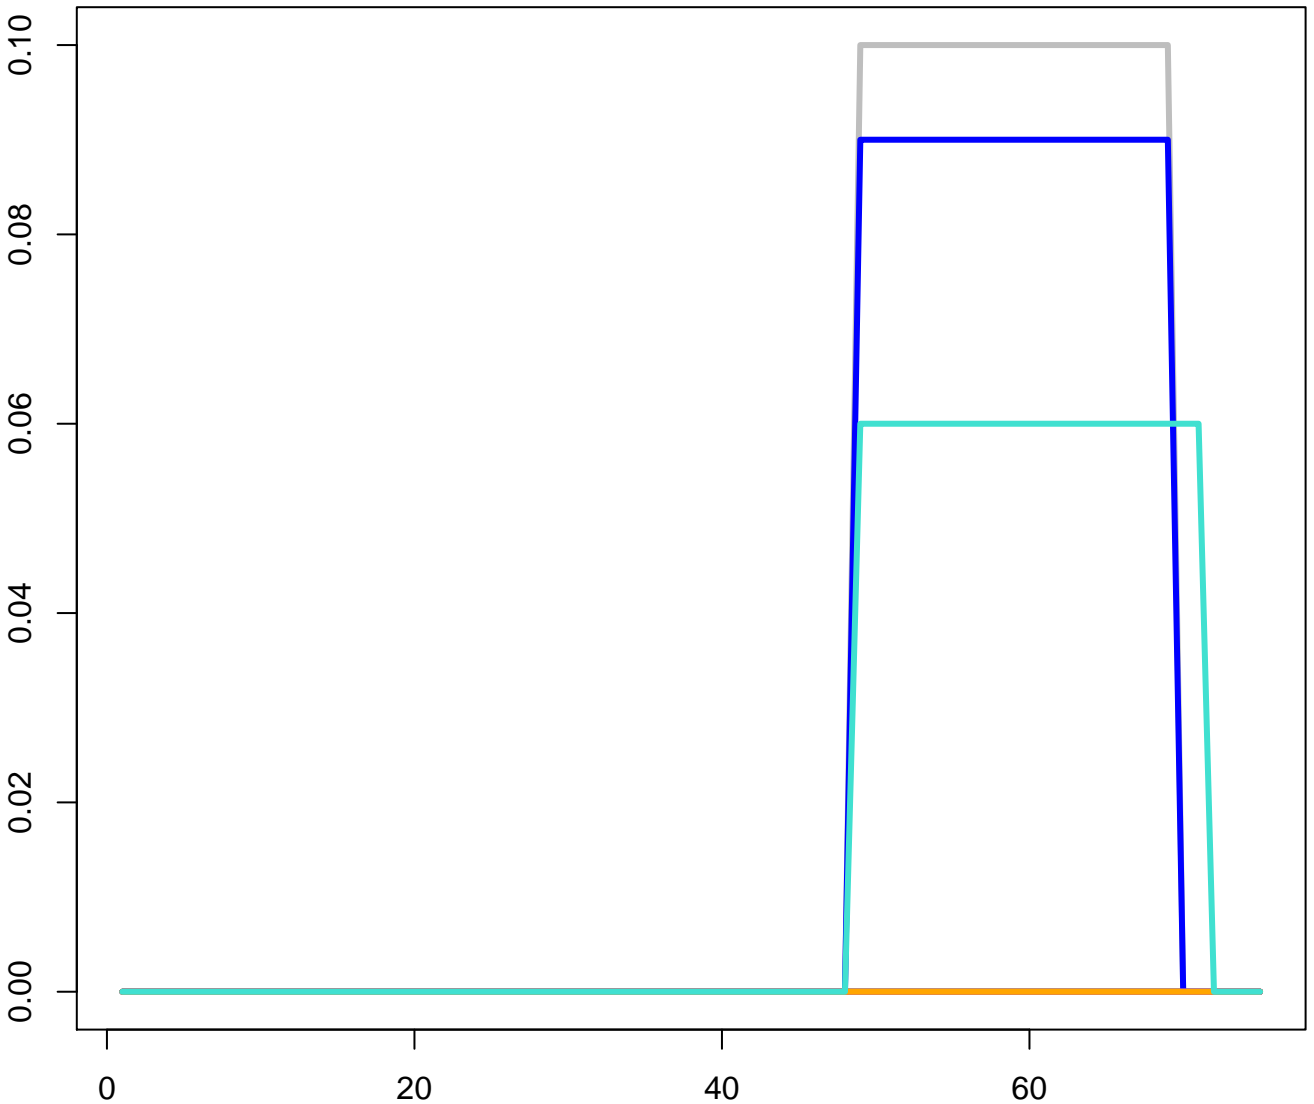

blood brain heart kidney lung ovary skin muscle testis

# 33\_18506878-18506963(-)\_cfa-mir-568\_low

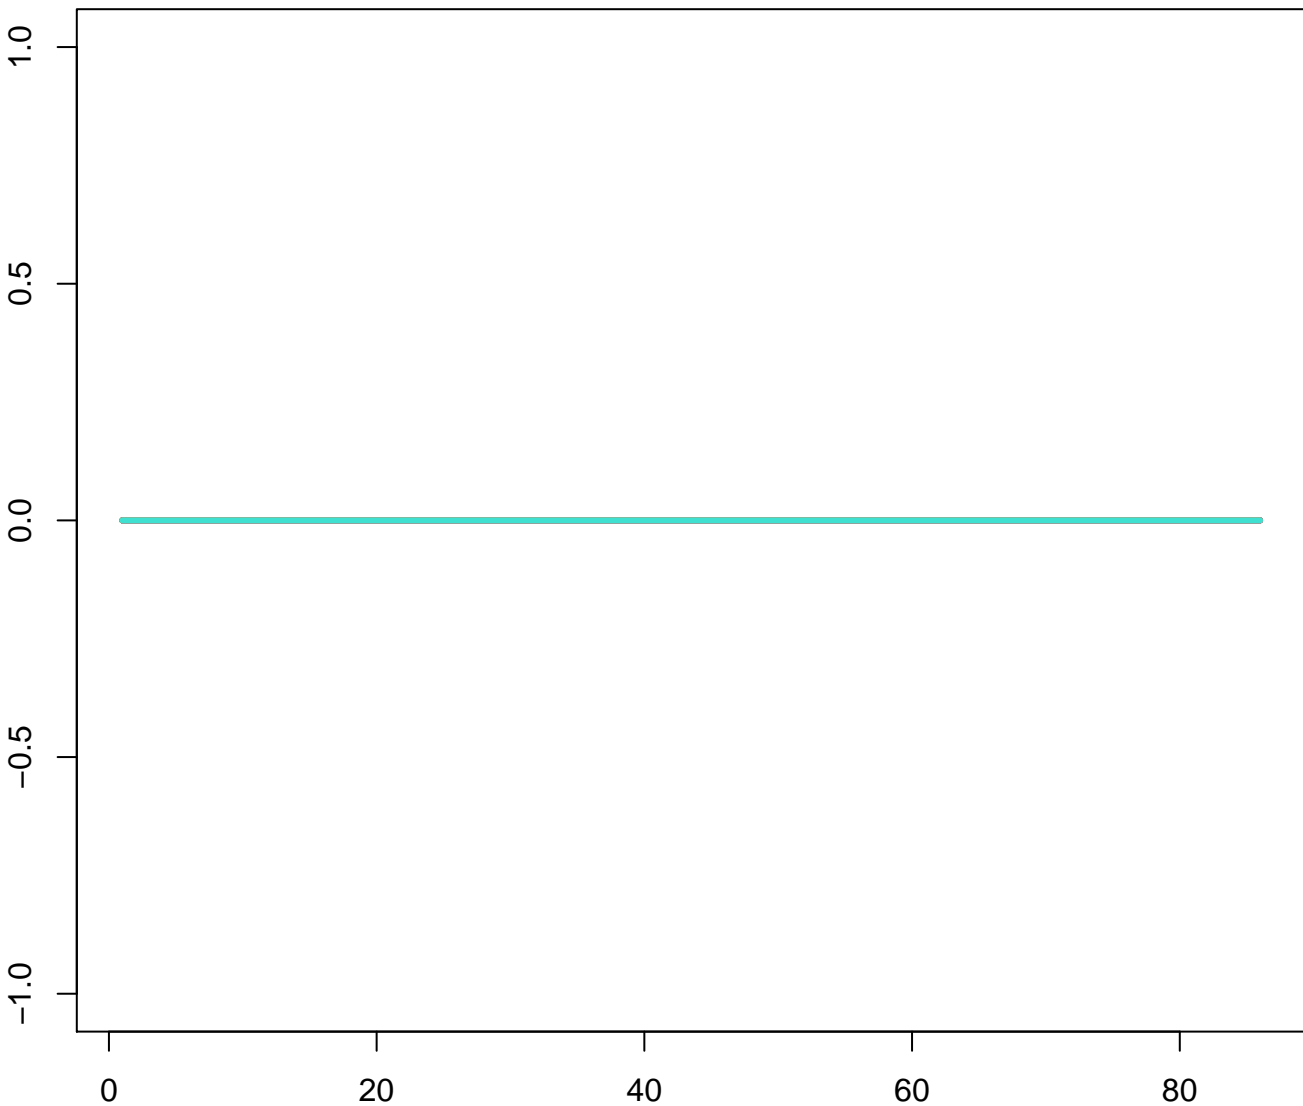

blood brain heart kidney lung ovary skin muscle testis

# 33\_23649303-23649411(-)\_cfa-mir-6529\_high

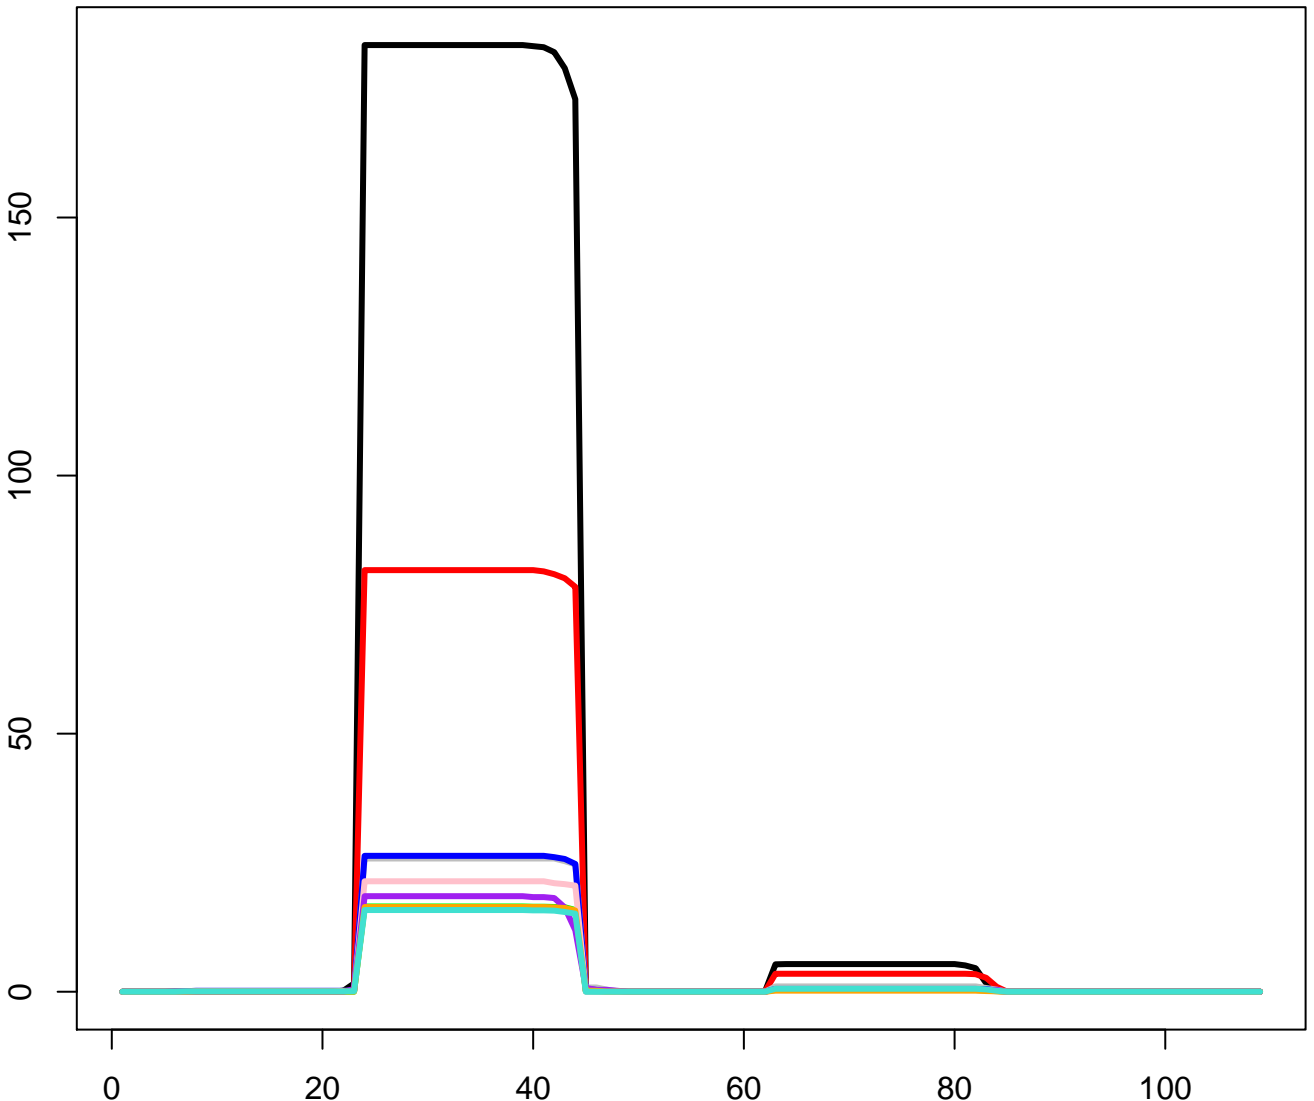

— blood — brain — heart — kidney — lung — ovary — skin — muscle — testis

# 33\_23649314-23649403(+)\_mir-6529\_low

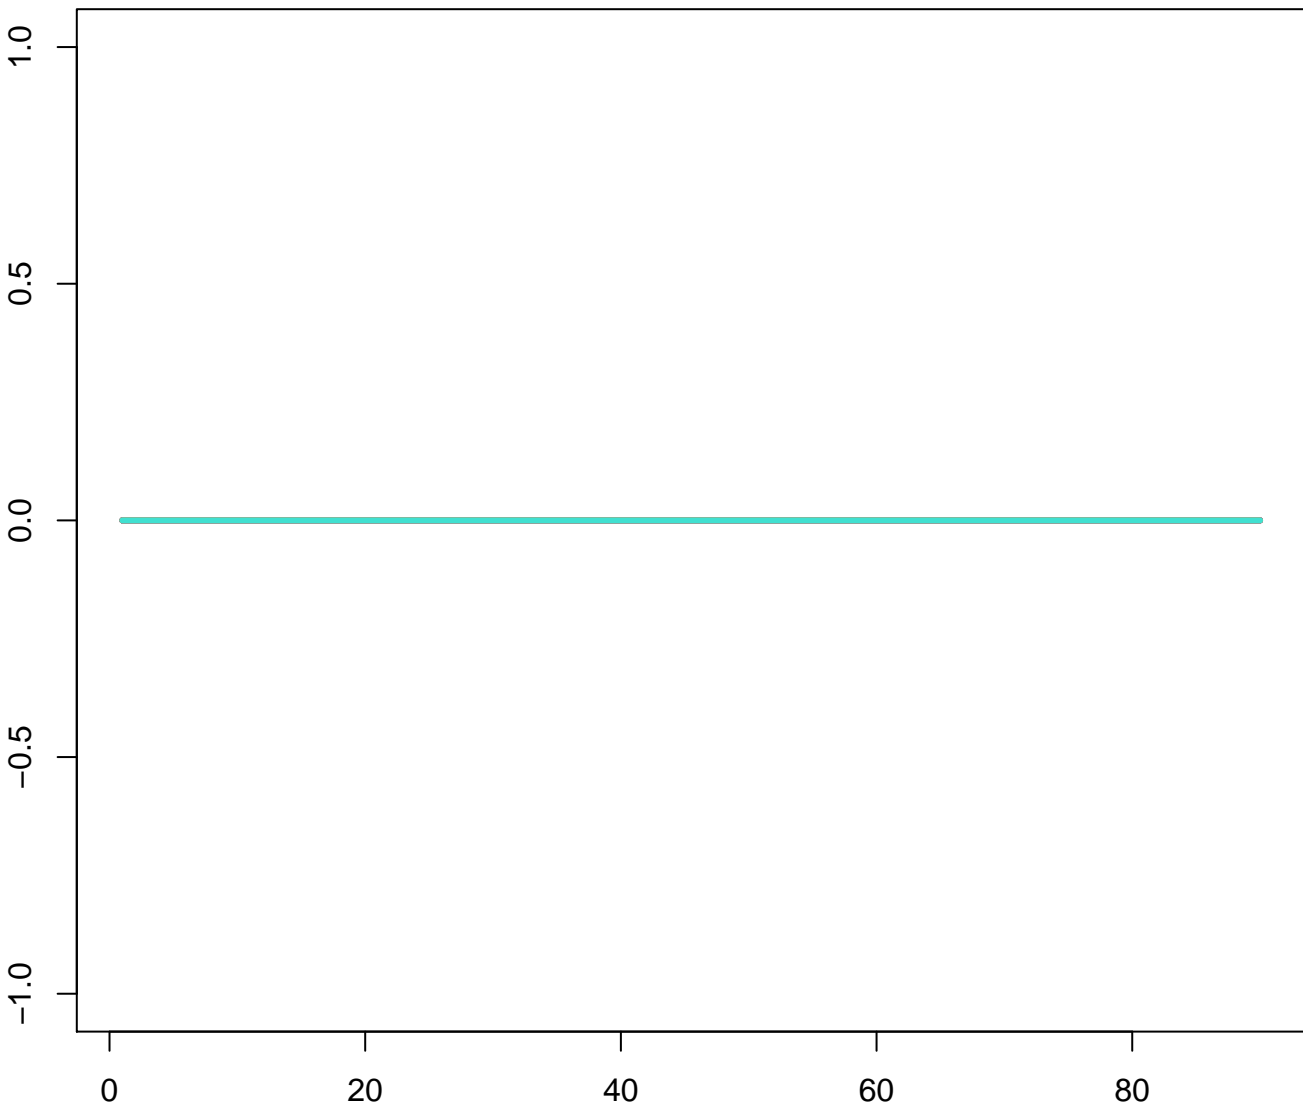

blood brain heart kidney lung ovary skin muscle testis

# 33\_29672097-29672241(+)\_cfa-mir-8789\_low

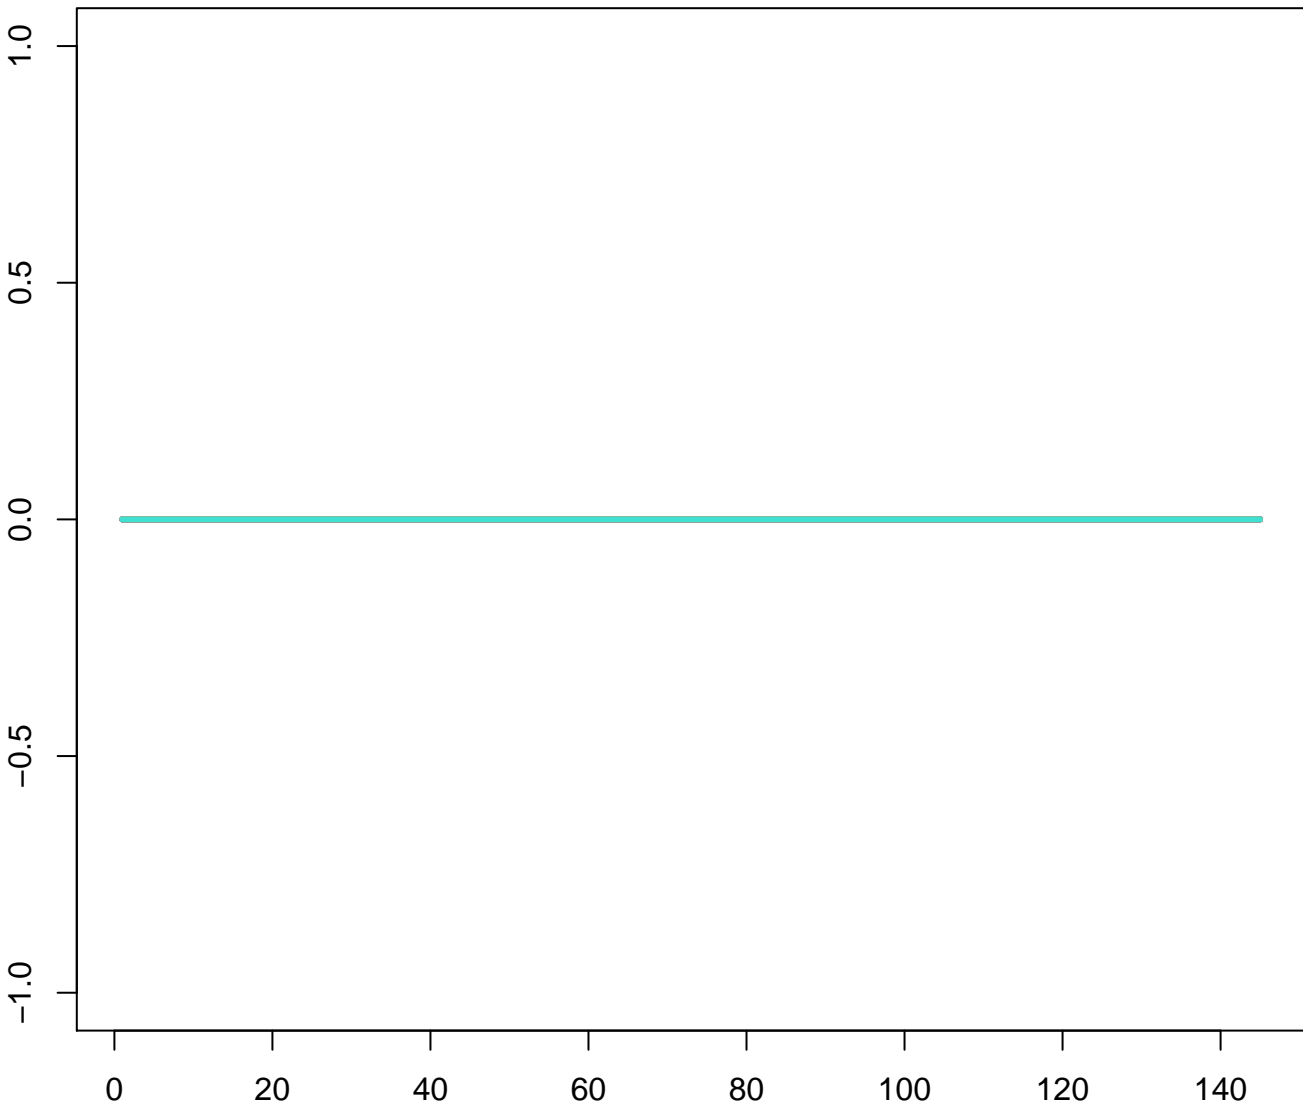

blood brain heart kidney lung ovary skin muscle testis

# 34\_12141935-12142057(-)\_mir-8790\_low

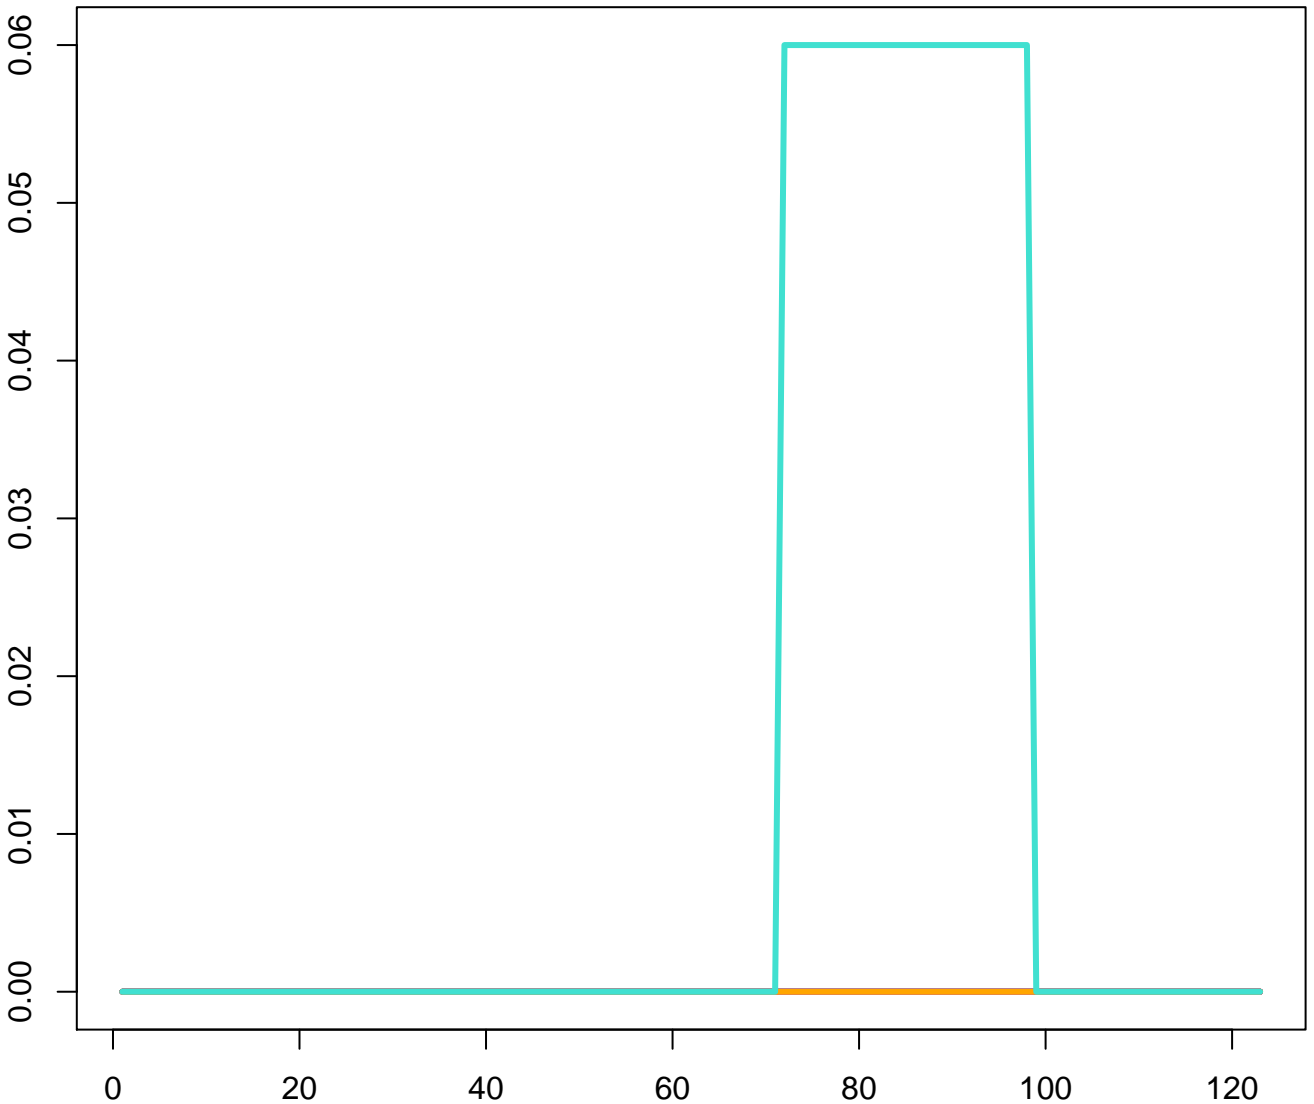

blood brain heart kidney lung ovary skin muscle testis





# 34\_14840248-14840312(+)\_mir-1897\_low

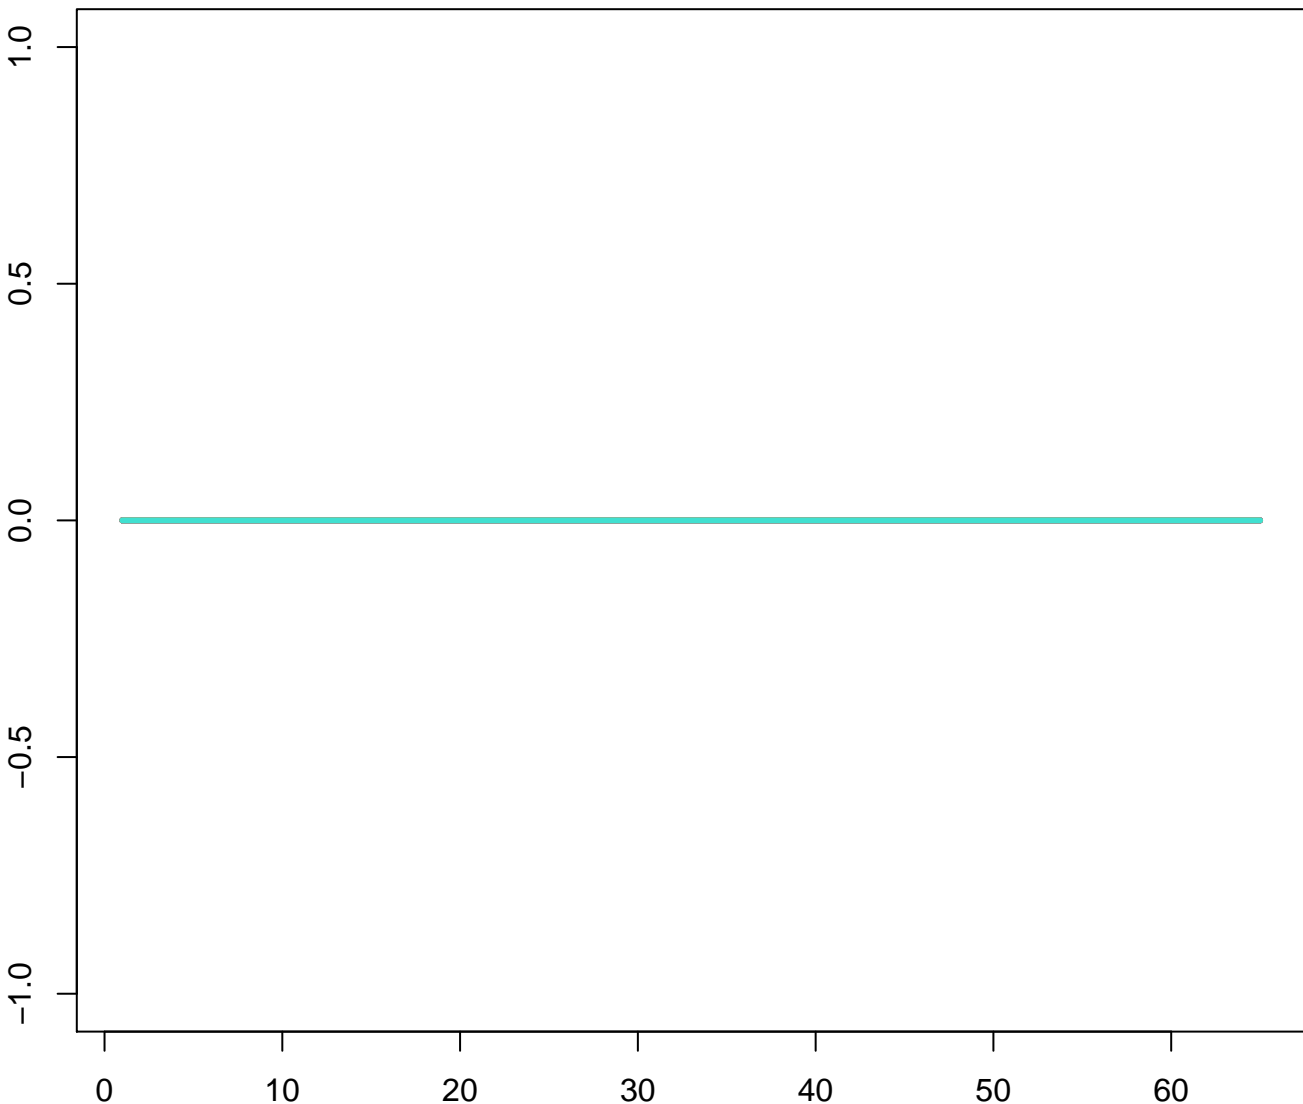

blood brain heart kidney lung ovary skin muscle testis

# 34\_17134367-17134457(+)\_mir-1224\_high

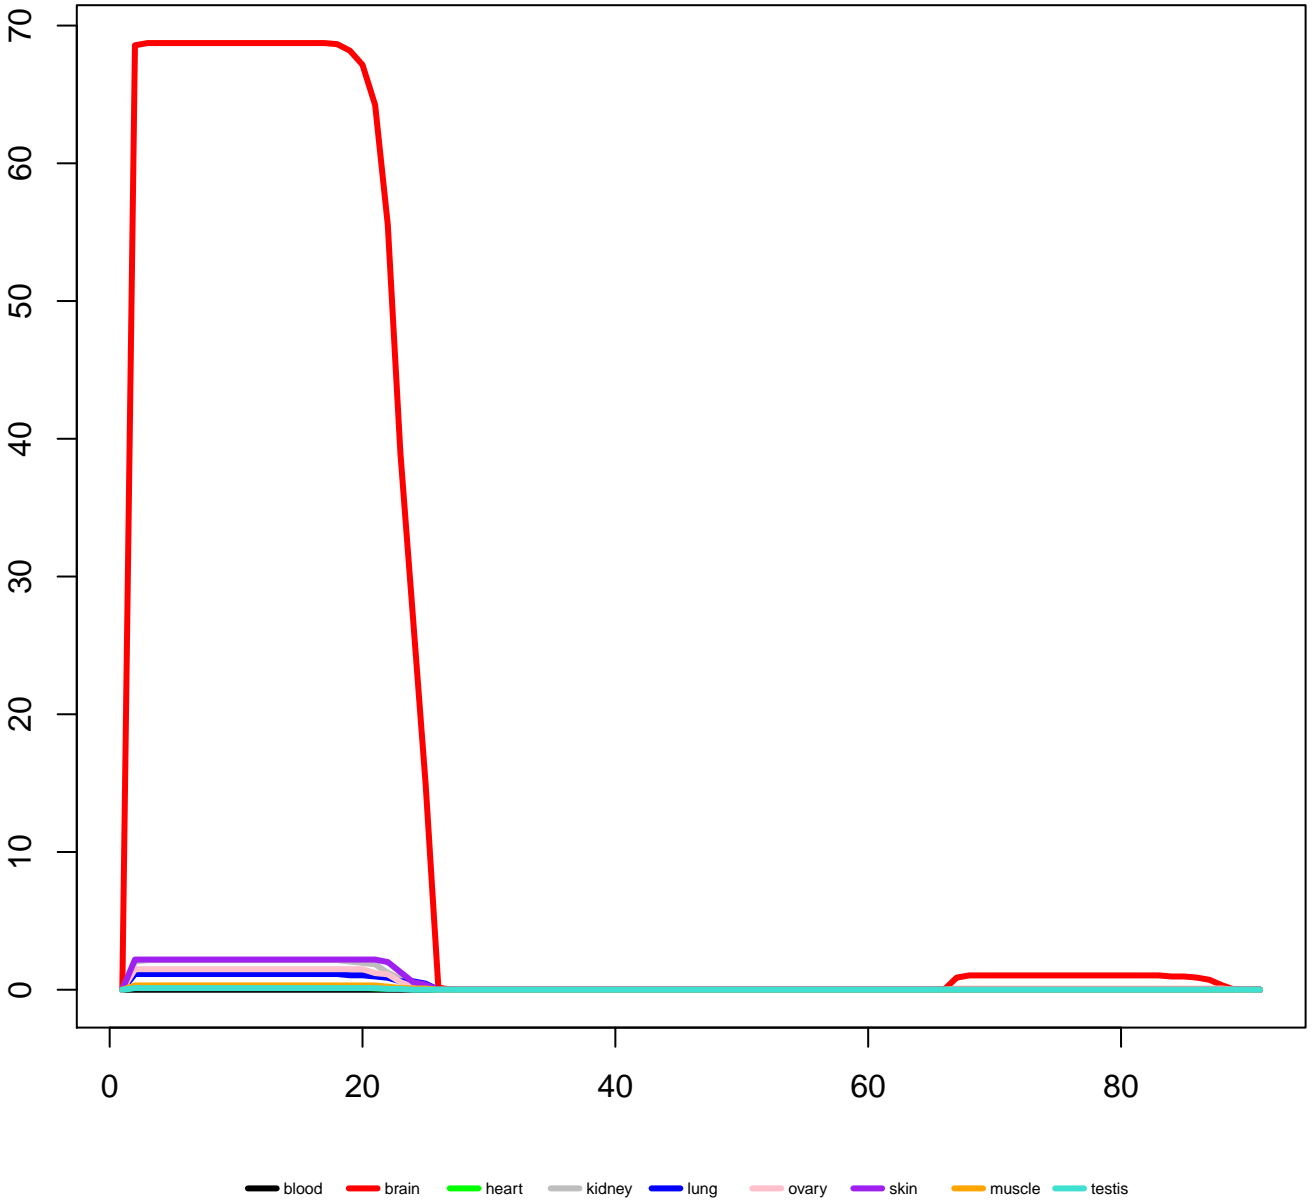



# 34\_20971517-20971578(+)\_cfa-mir-28\_high

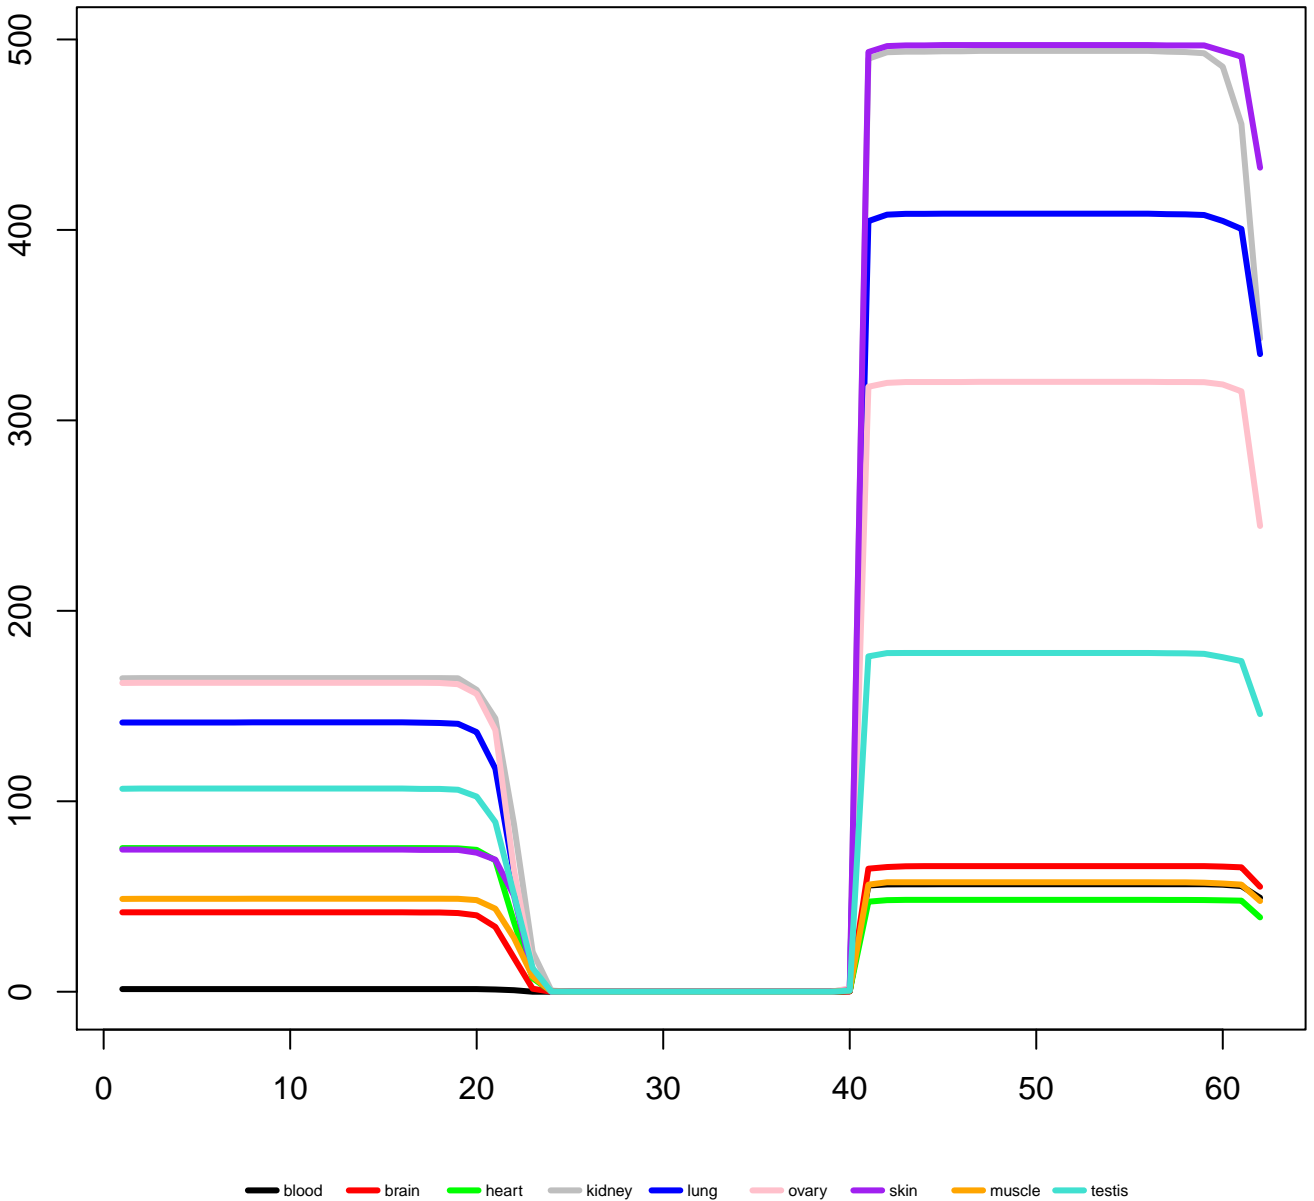





# 34\_33292499-33292588(+)\_cfa-mir-551b\_high

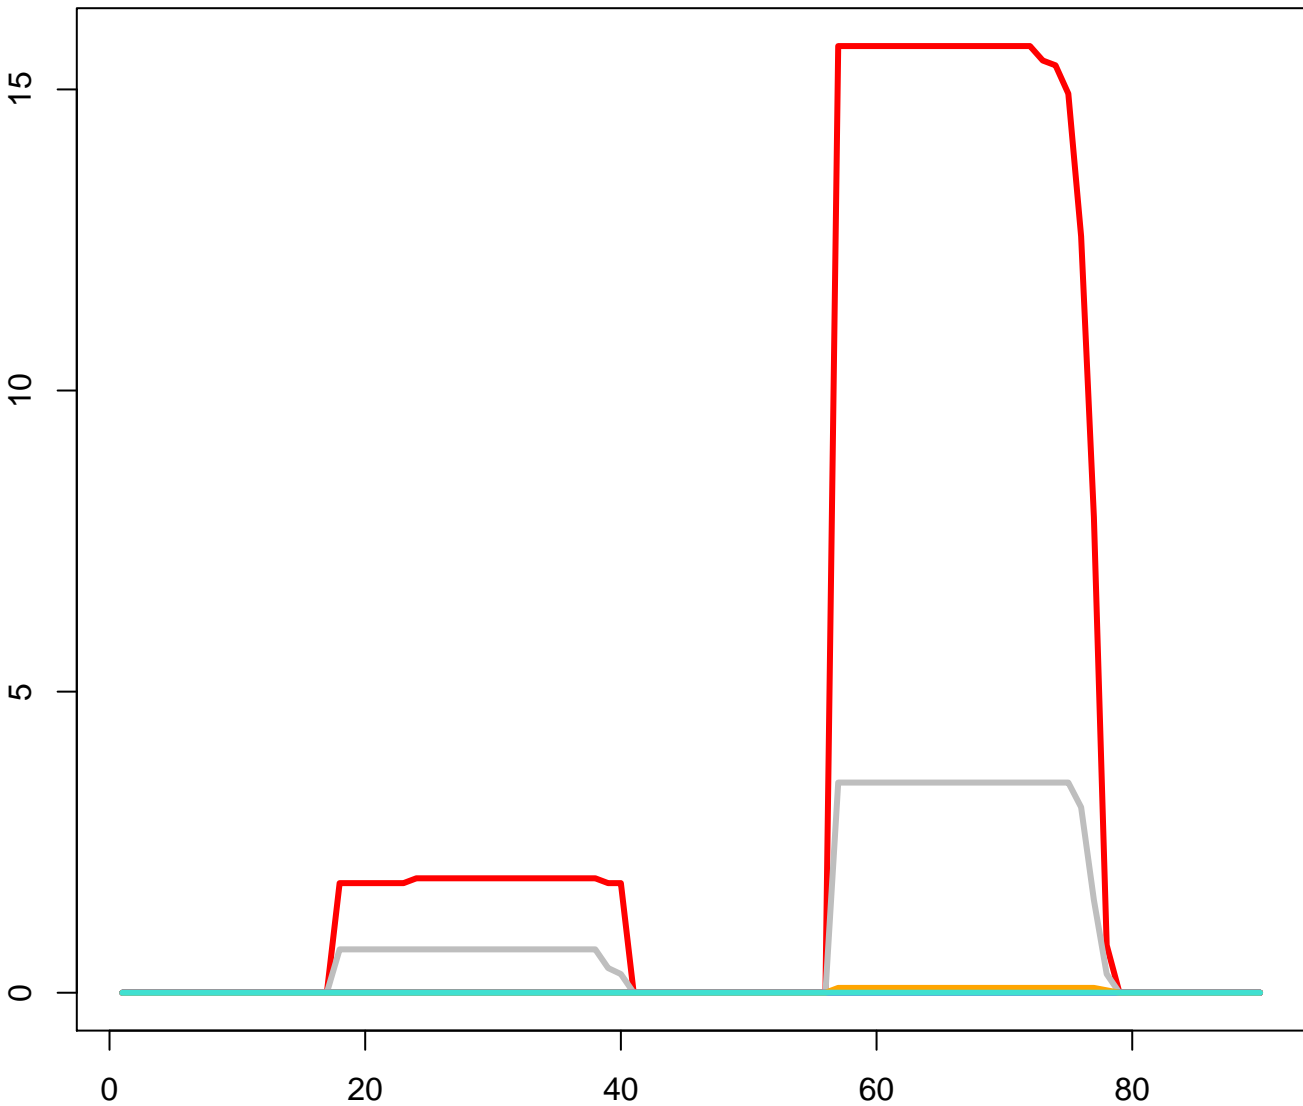

blood brain heart kidney lung ovary skin muscle testis

# 34\_35465927-35466022(-)\_mir-569\_low

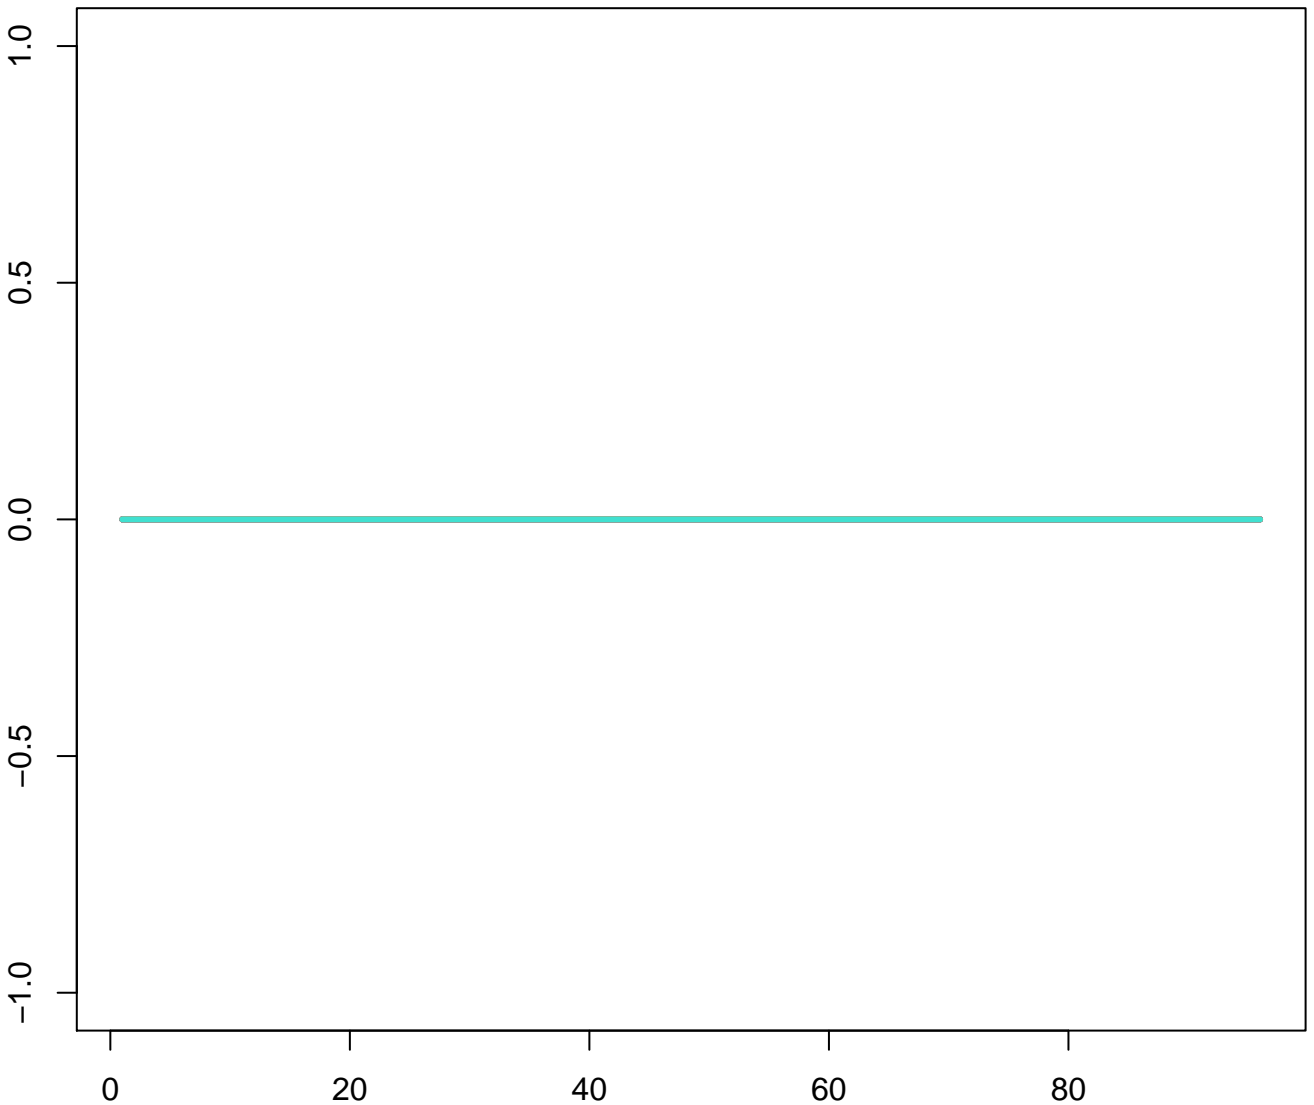

— blood — brain — heart — kidney — lung — ovary — skin — muscle — testis





# 36\_1546410-1546530(+)\_cfa-mir-8797\_low

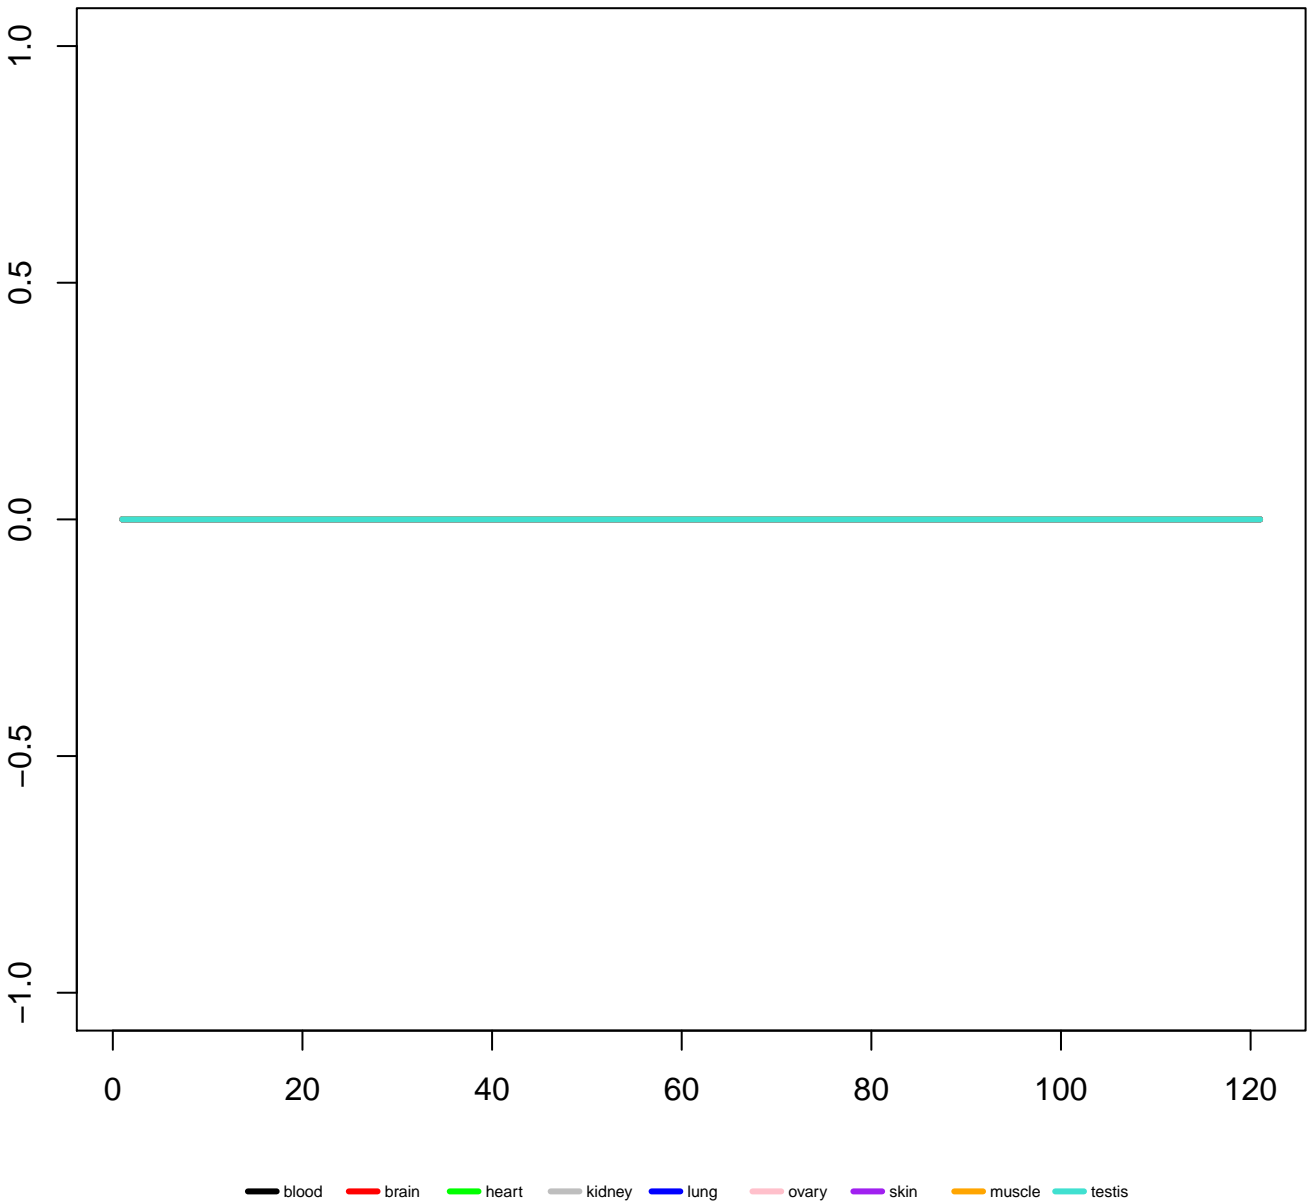

# 36\_10420663-10420760(+)\_mir-8797\_low

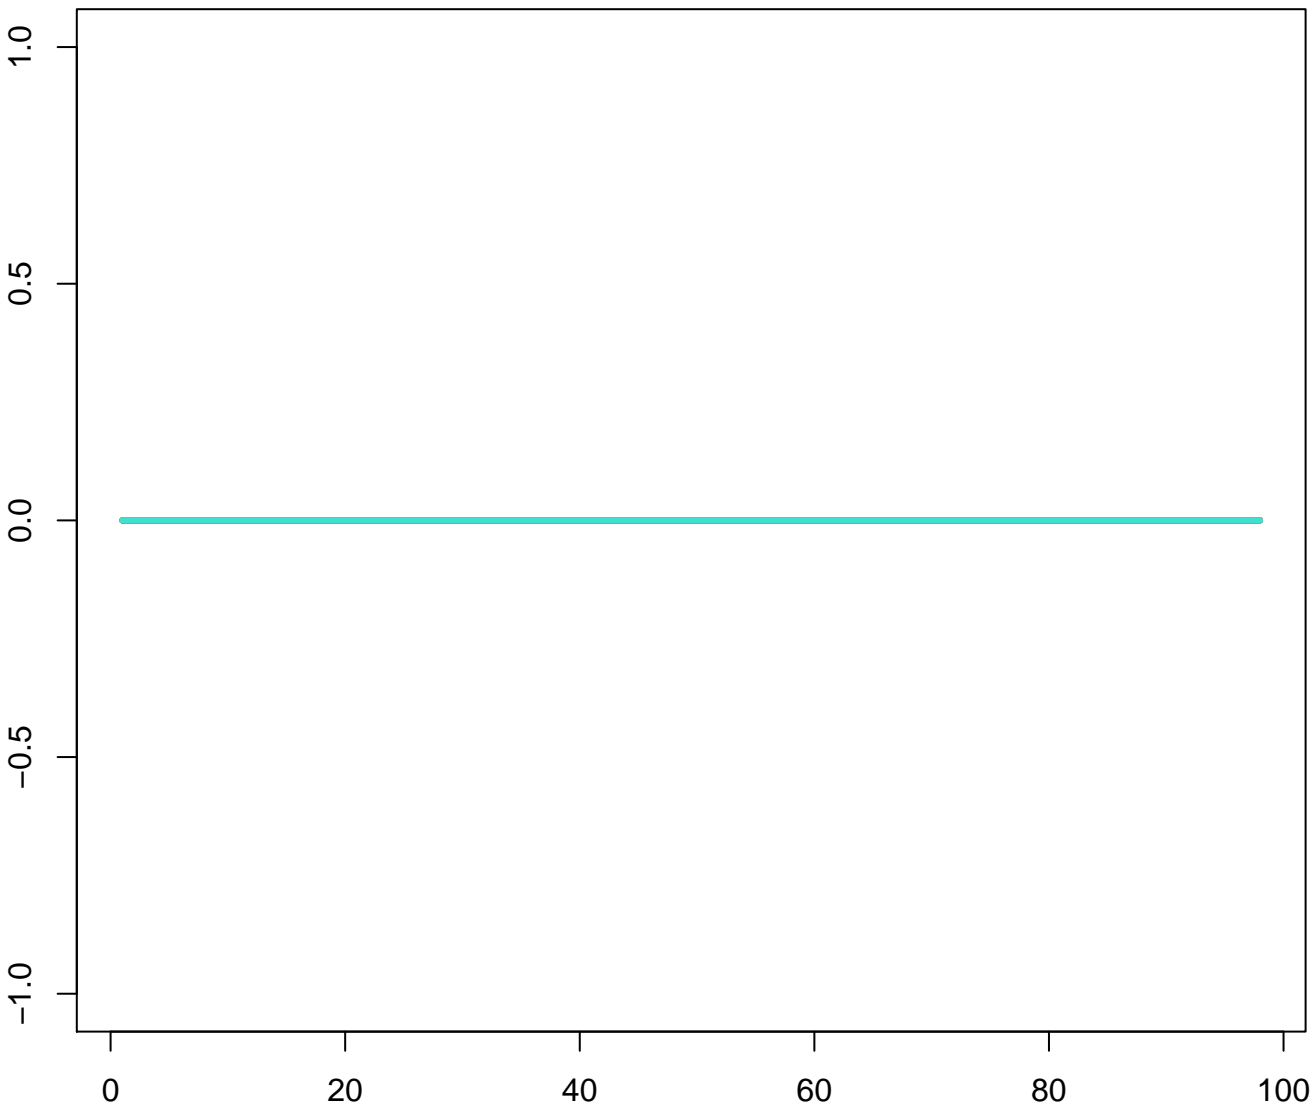

blood brain heart kidney lung ovary skin muscle testis

# 36\_19933715-19933814(-)\_mir-9183\_low

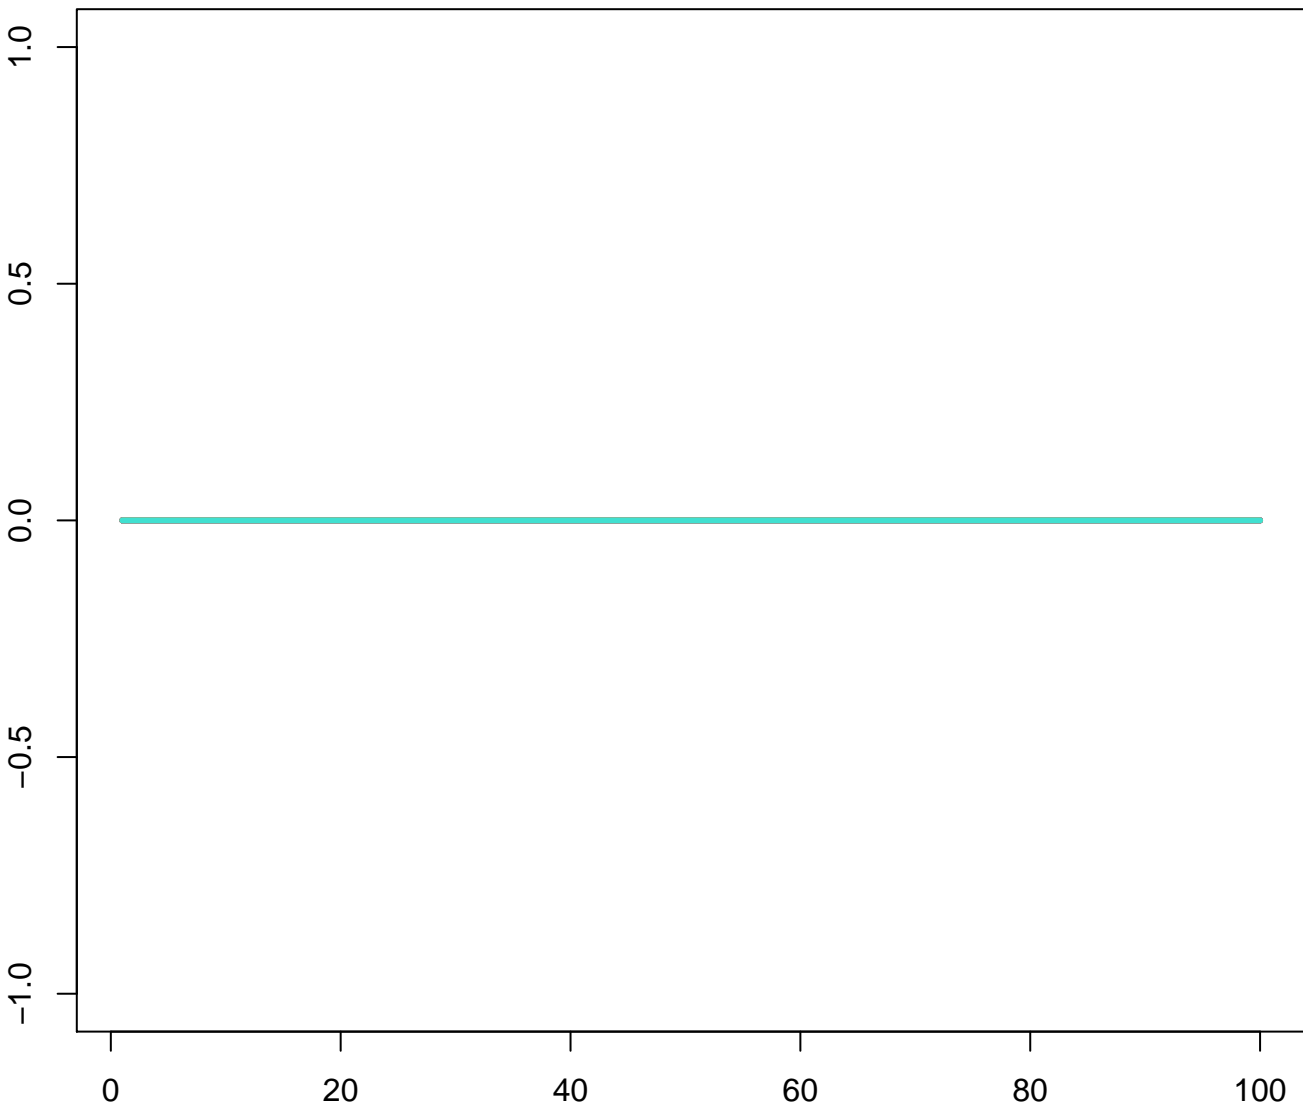

blood brain heart kidney lung ovary skin muscle testis

# 36\_19958913-19959013(+)\_cfa-mir-10b\_high

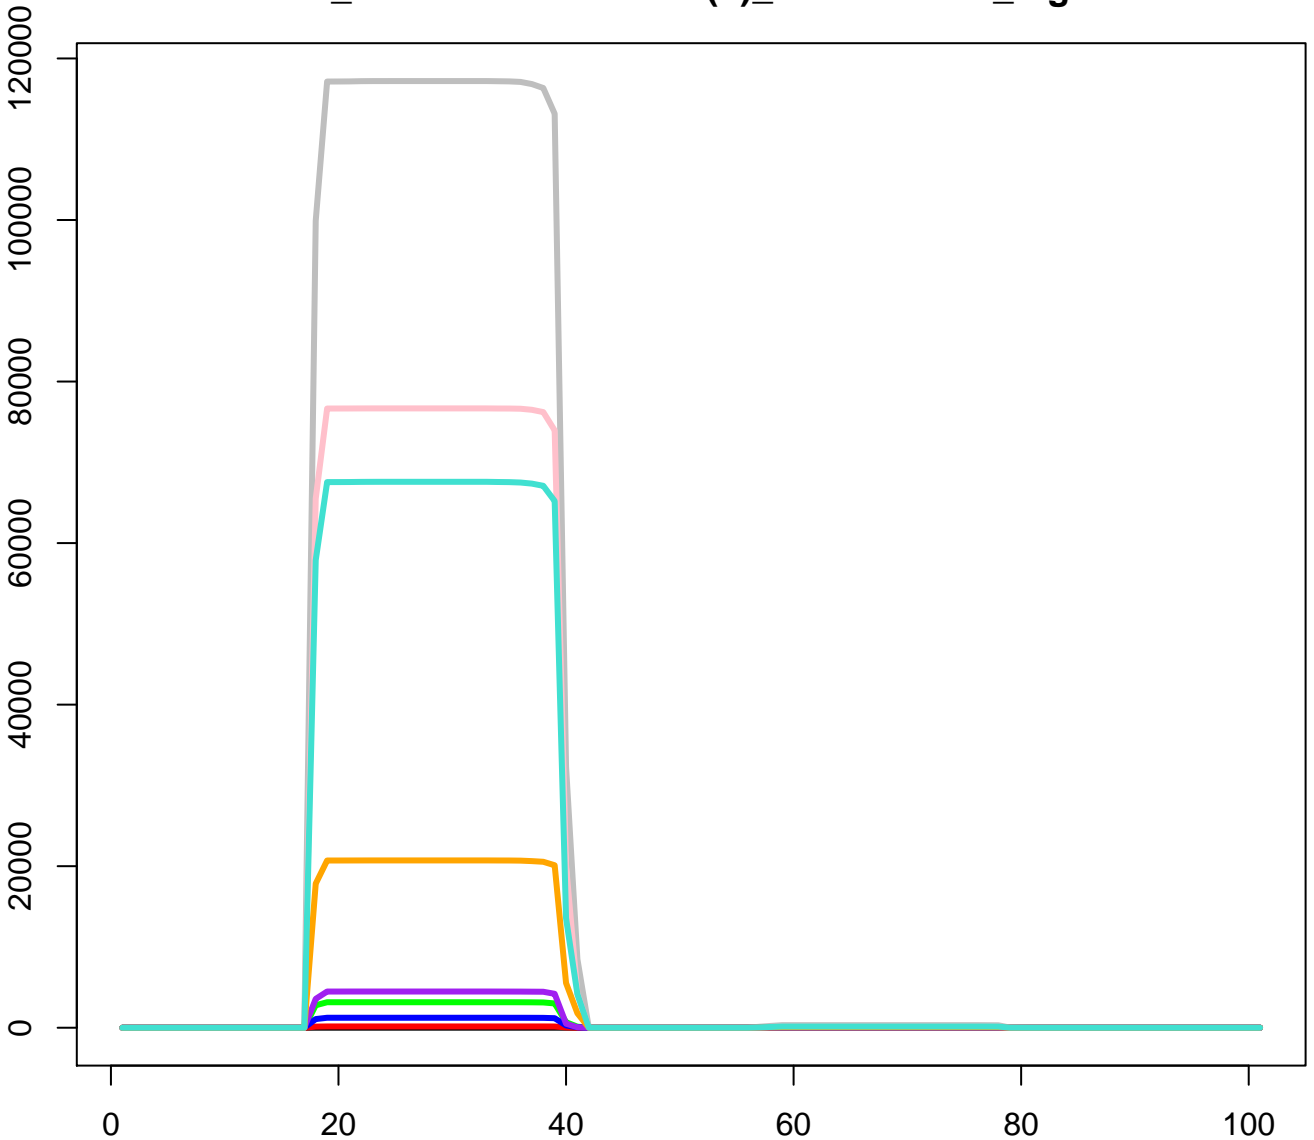

blood brain heart kidney lung ovary skin muscle testis

# 36\_21115493-21115617(-)\_cfa-mir-8796\_low

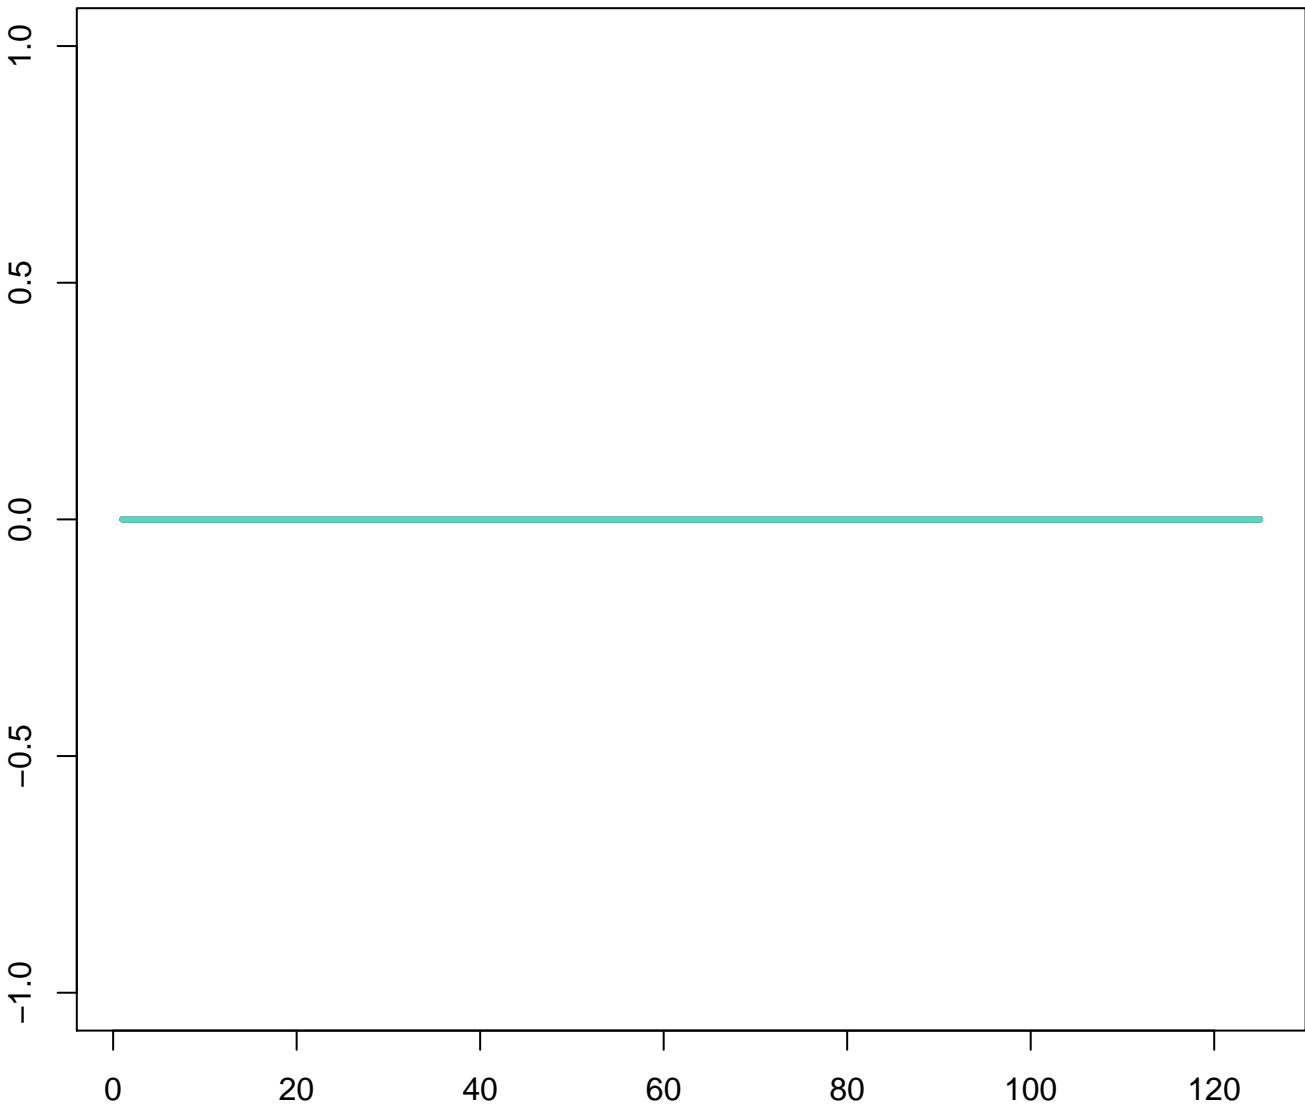

blood brain heart kidney lung ovary skin muscle testis

# 37\_15549130-15549200(-)\_mir-2355\_high

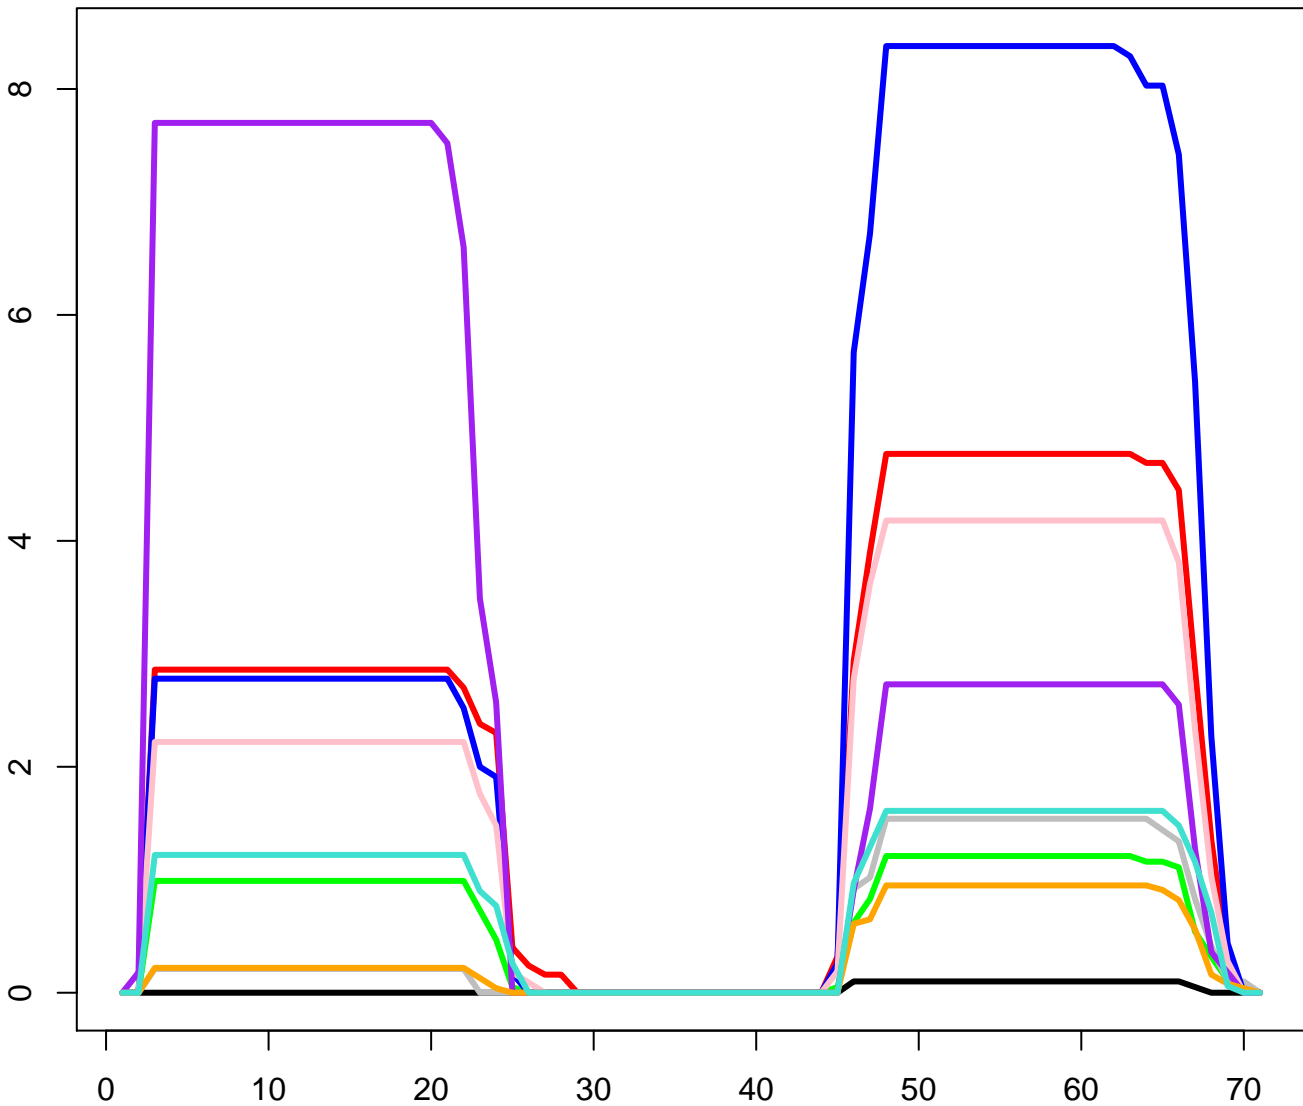

— blood — brain — heart — kidney — lung — ovary — skin — muscle — testis

# 37\_25054488-25054543(+)\_cfa-mir-26b\_high

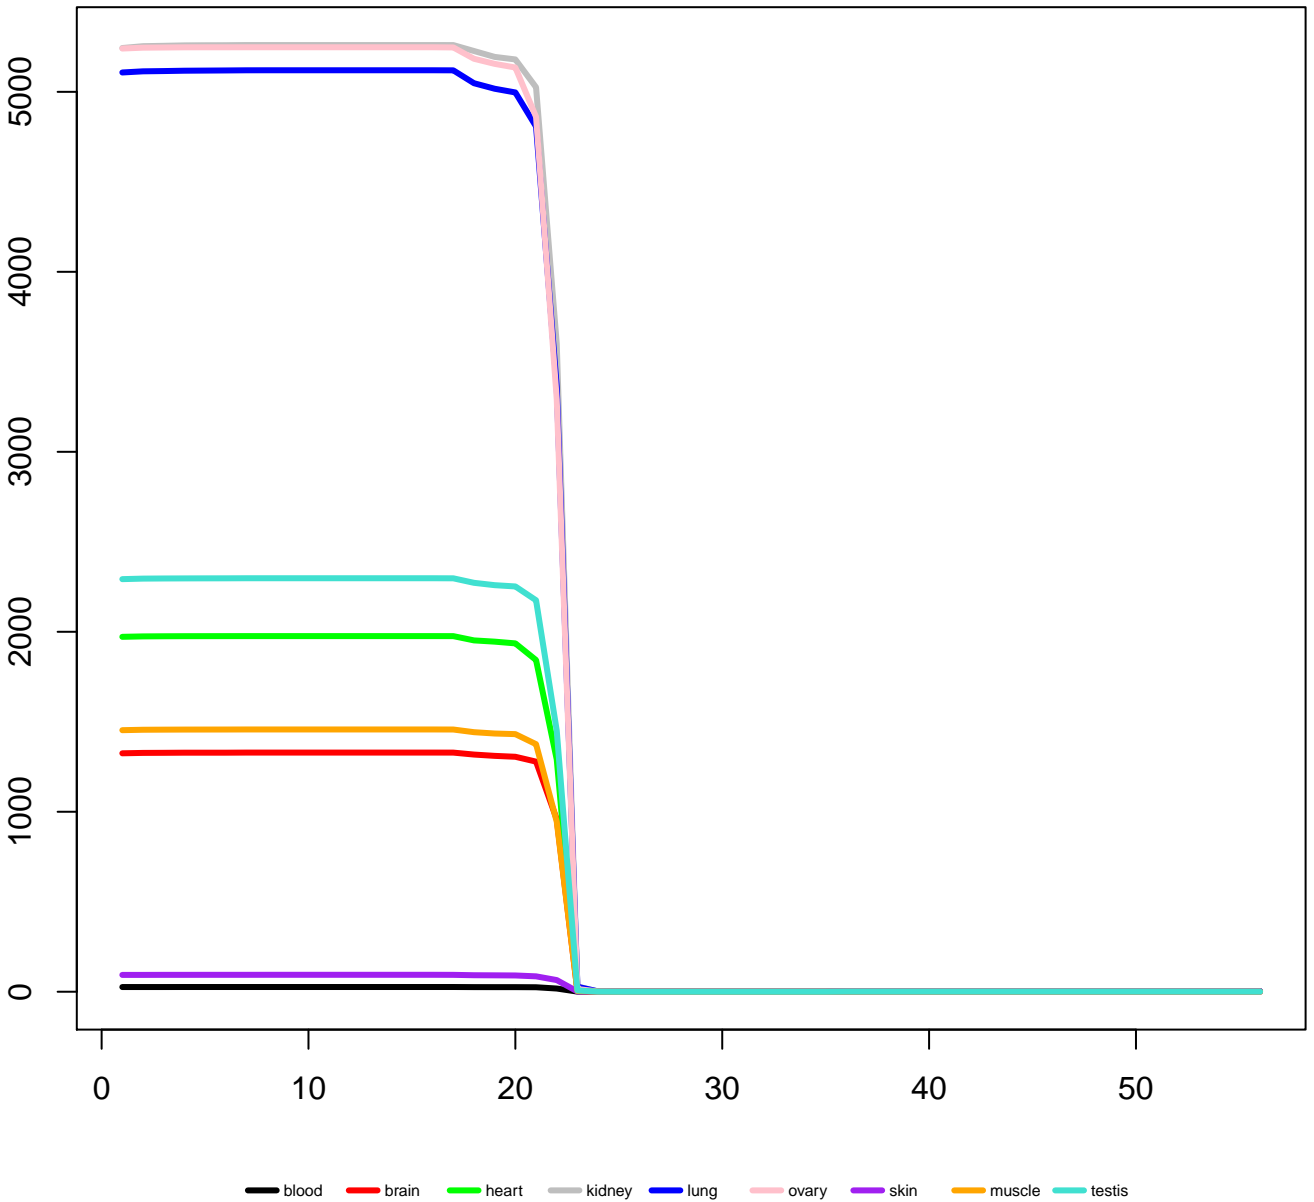



# 37\_25568052-25568121(-)\_cfa-mir-375\_high

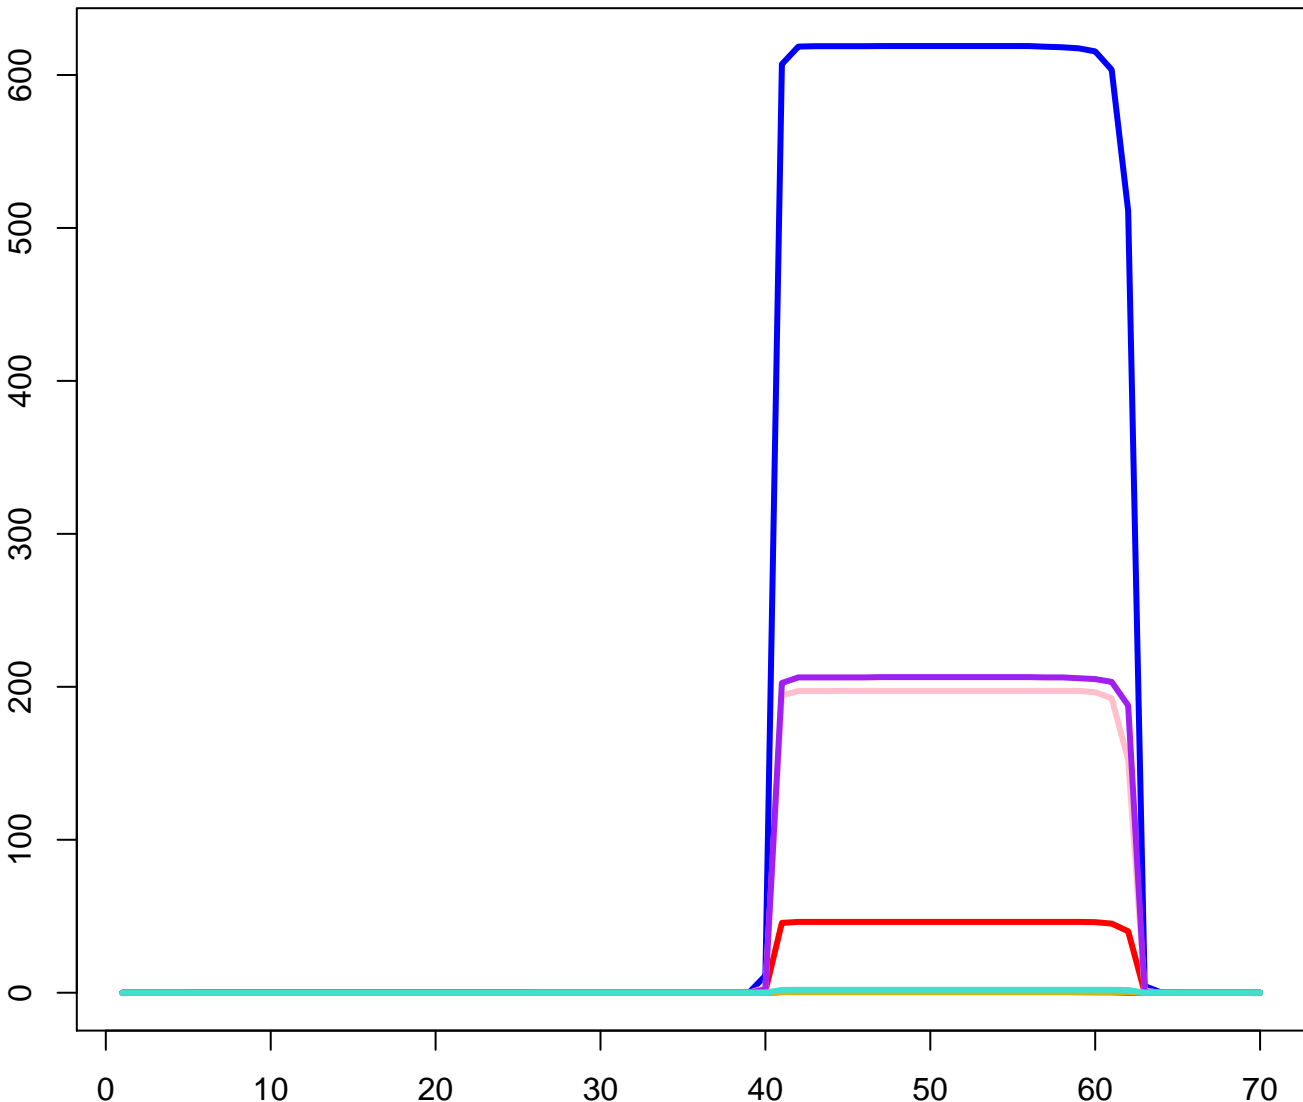

— blood — brain — heart — kidney — lung — ovary — skin — muscle — testis

# 37\_25734793-25734849(+)\_cfa-mir-1840\_high

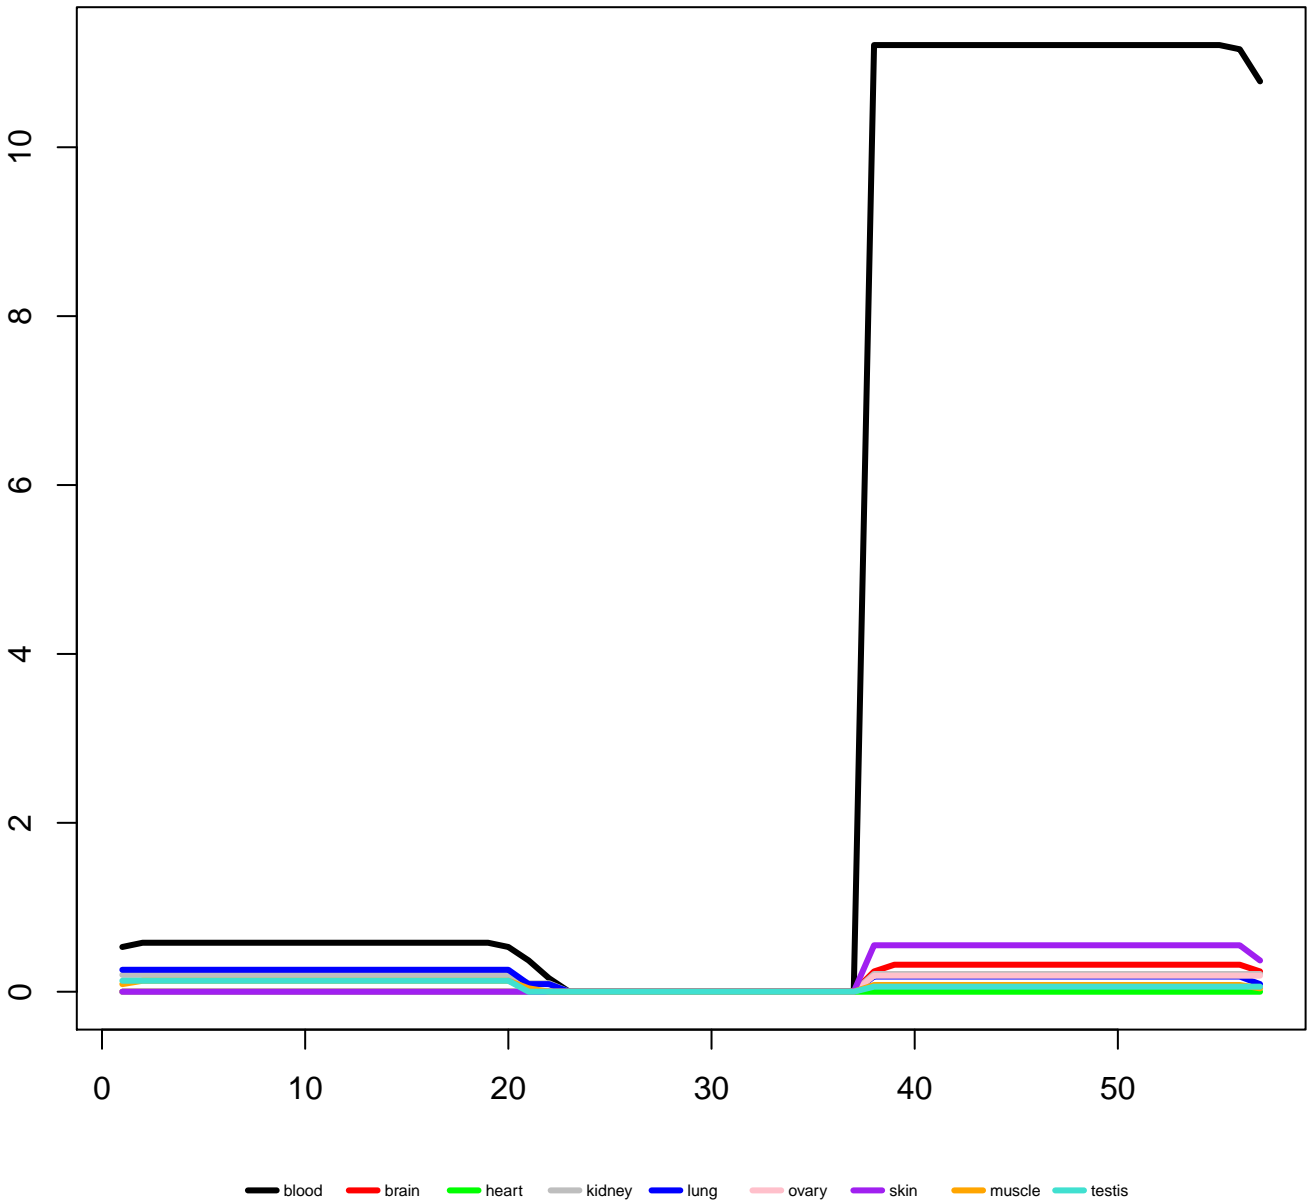

# 37\_30320456-30320558(+)\_cfa-mir-8795\_low

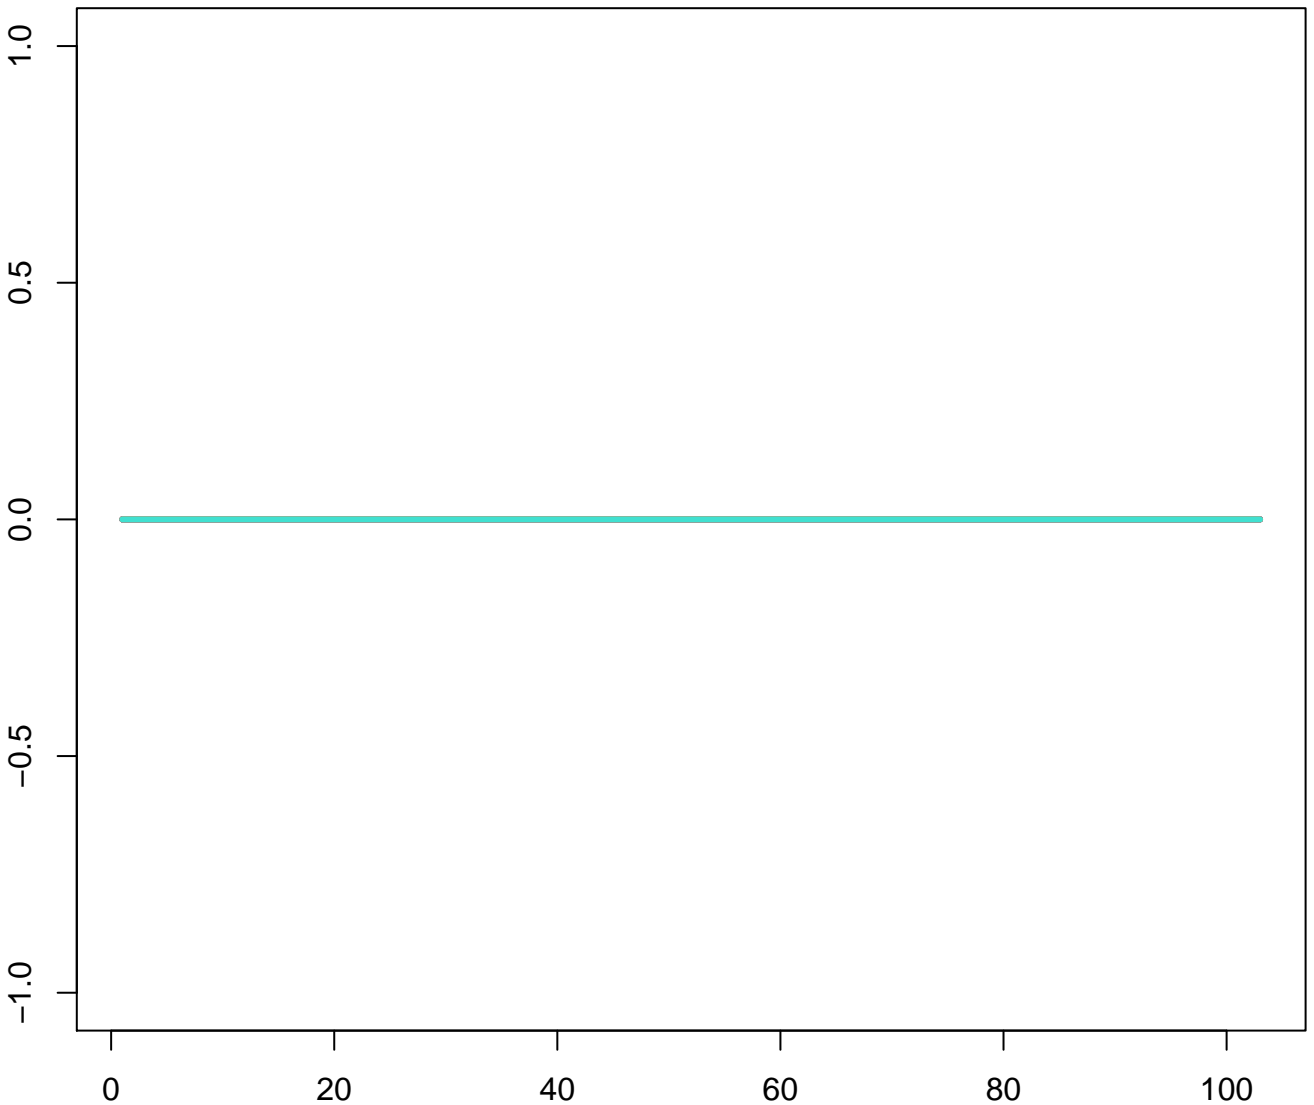

blood brain heart kidney lung ovary skin muscle testis

# 38\_1926558-1926646(-)\_cfa-mir-135b\_high

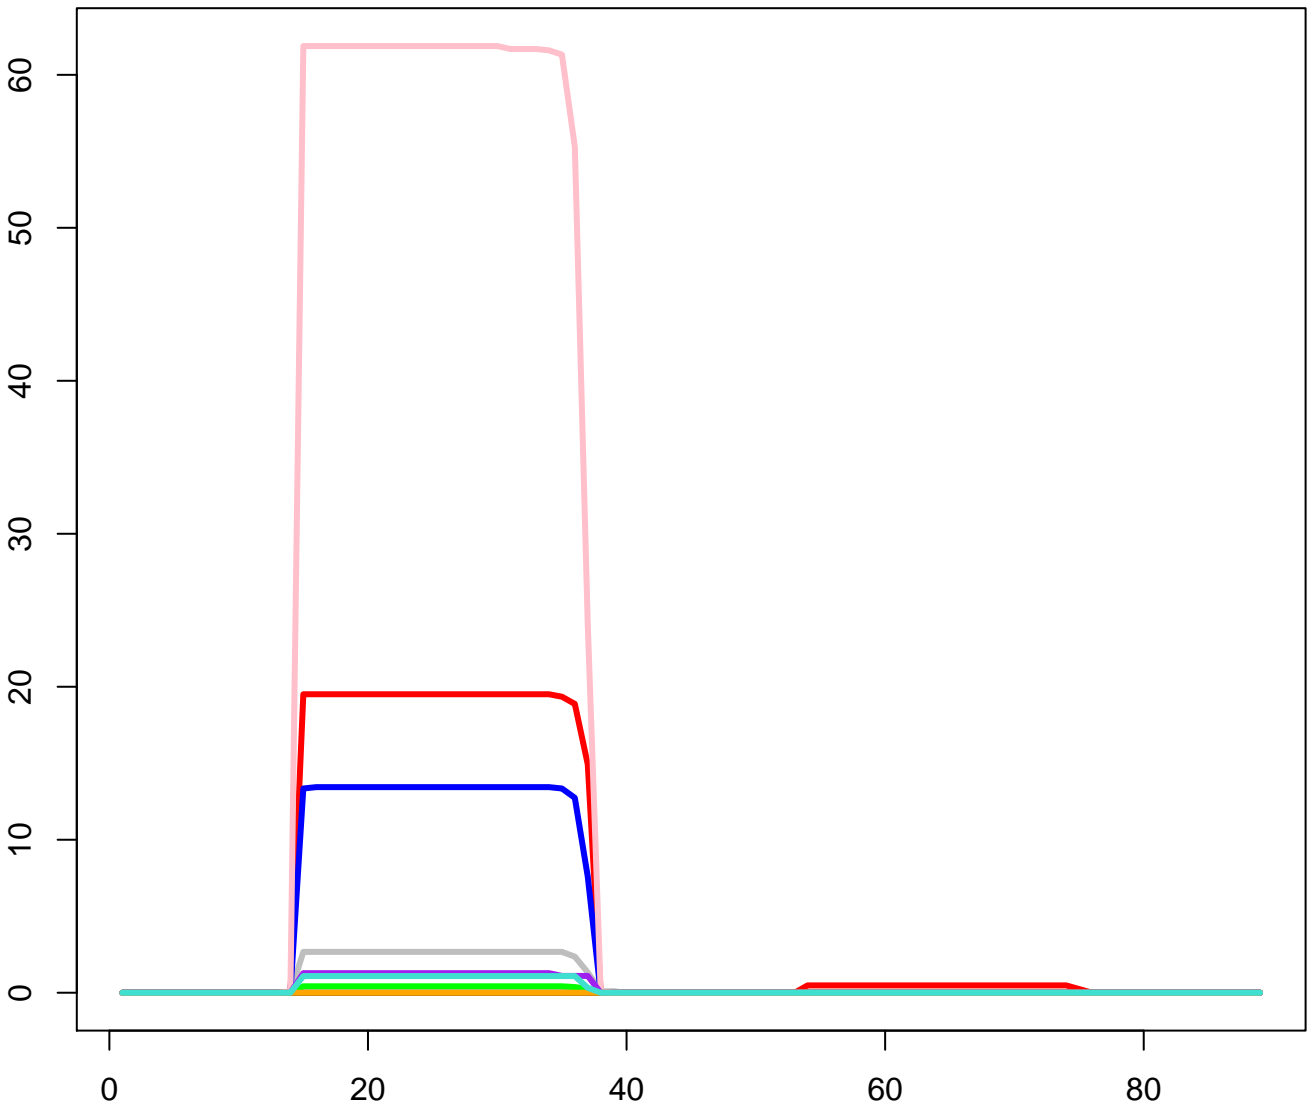

blood brain heart kidney lung ovary skin muscle testis

# 38\_14895108-14895186(-)\_cfa-mir-215\_high

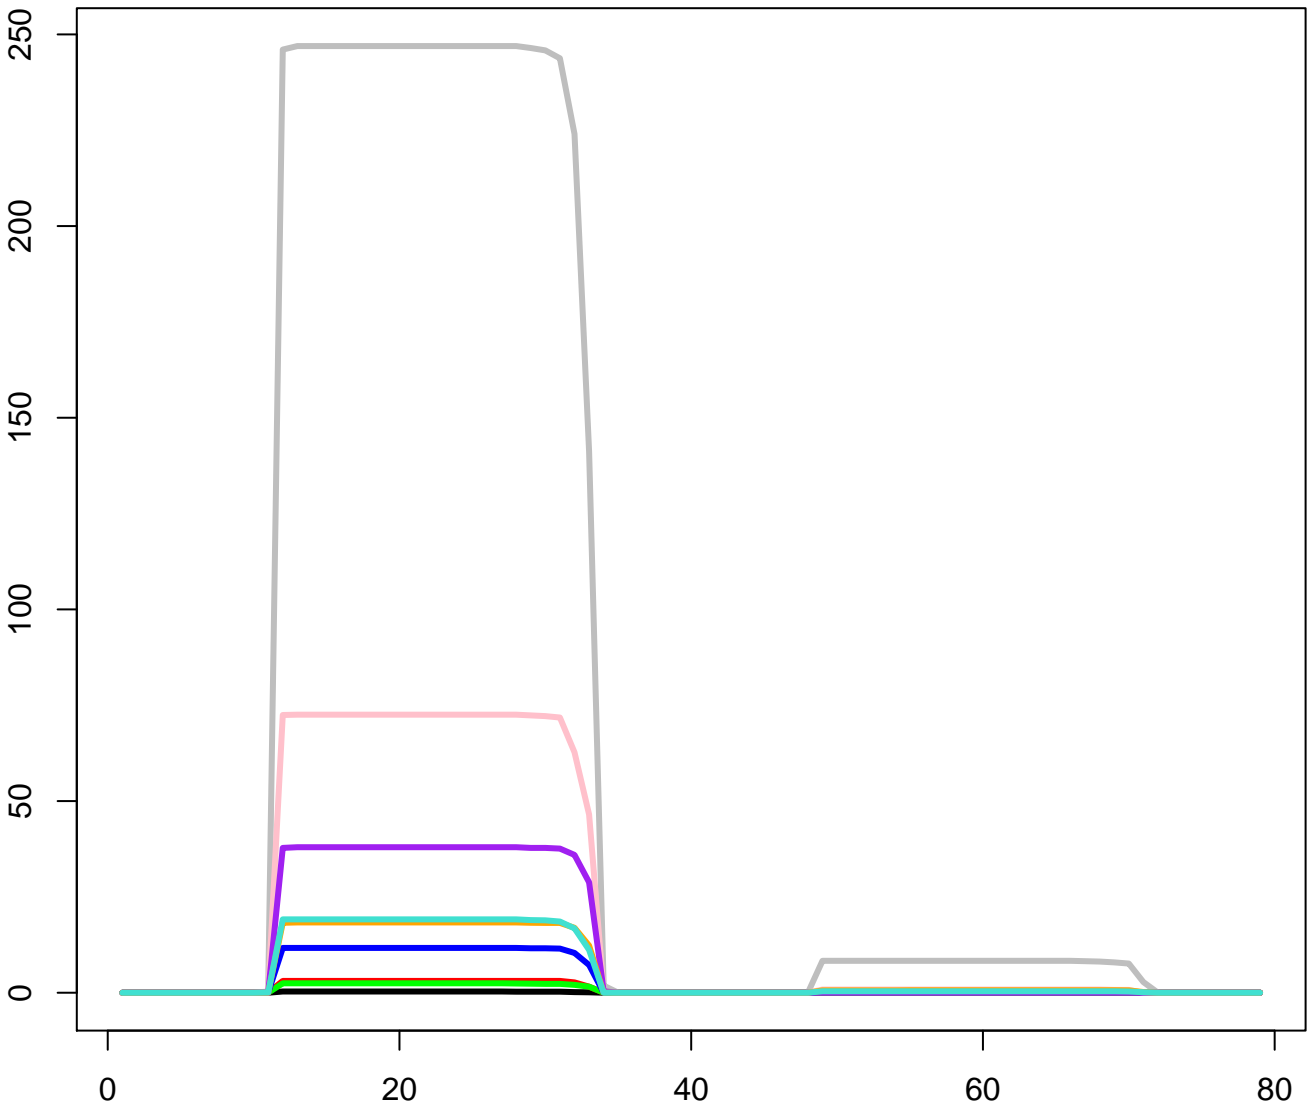

— blood — brain — heart — kidney — lung — ovary — skin — muscle — testis

# 38\_14895401-14895458(-)\_cfa-mir-194\_high

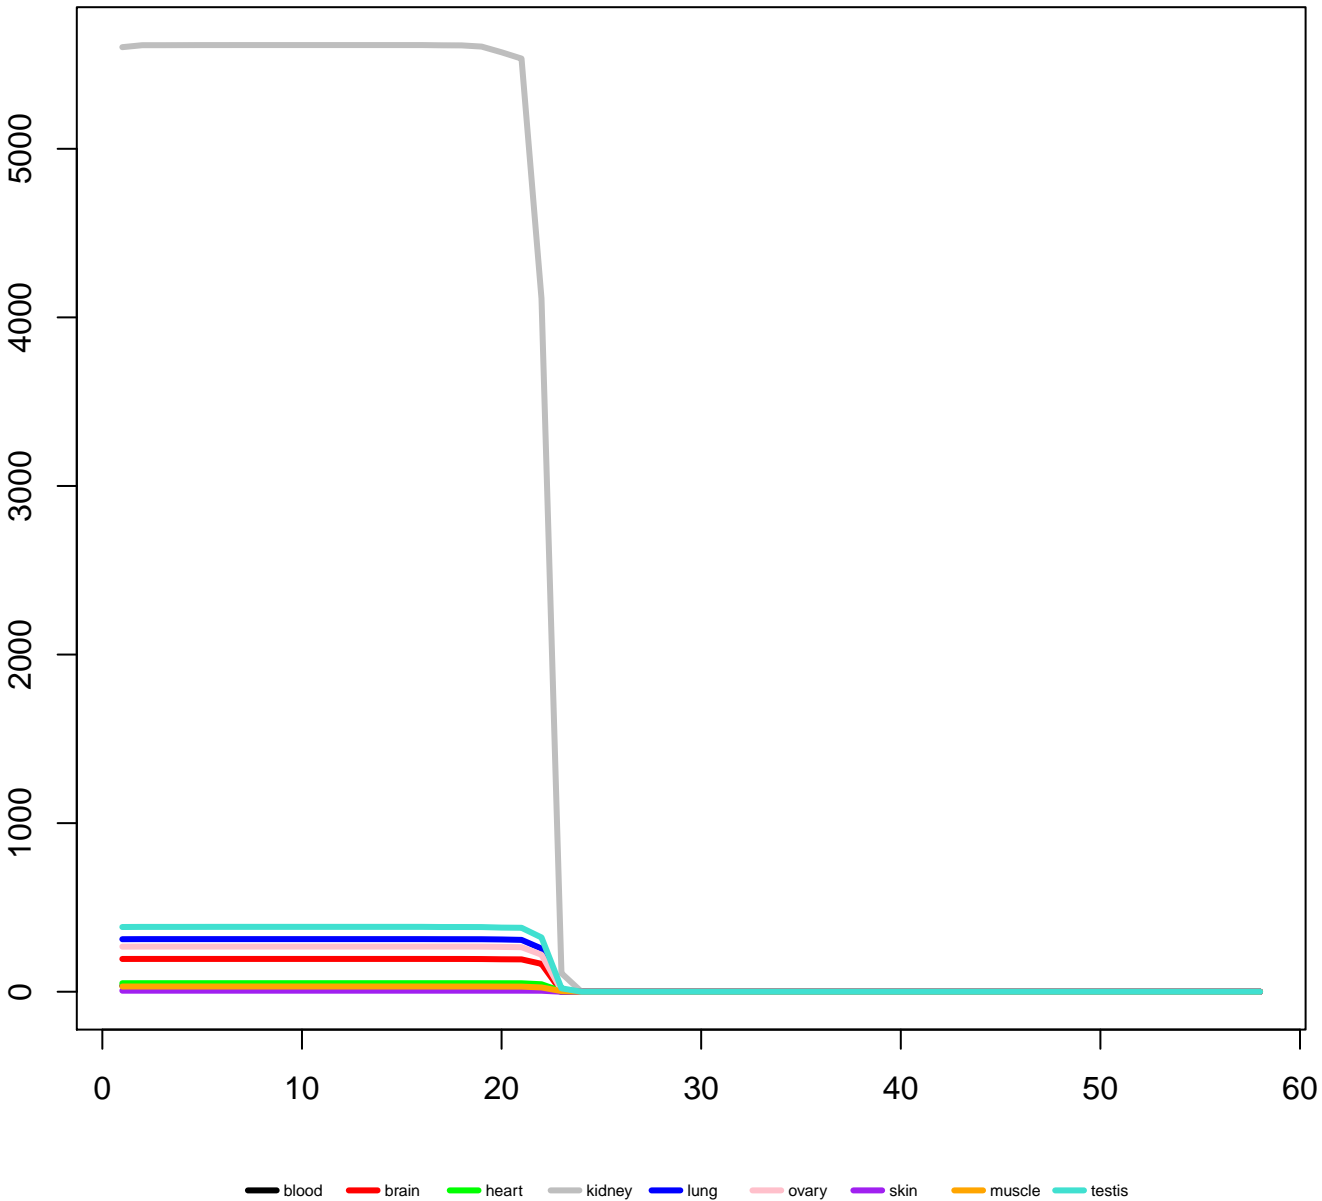

# 38\_14977030-14977090(-)\_cfa-mir-664\_high

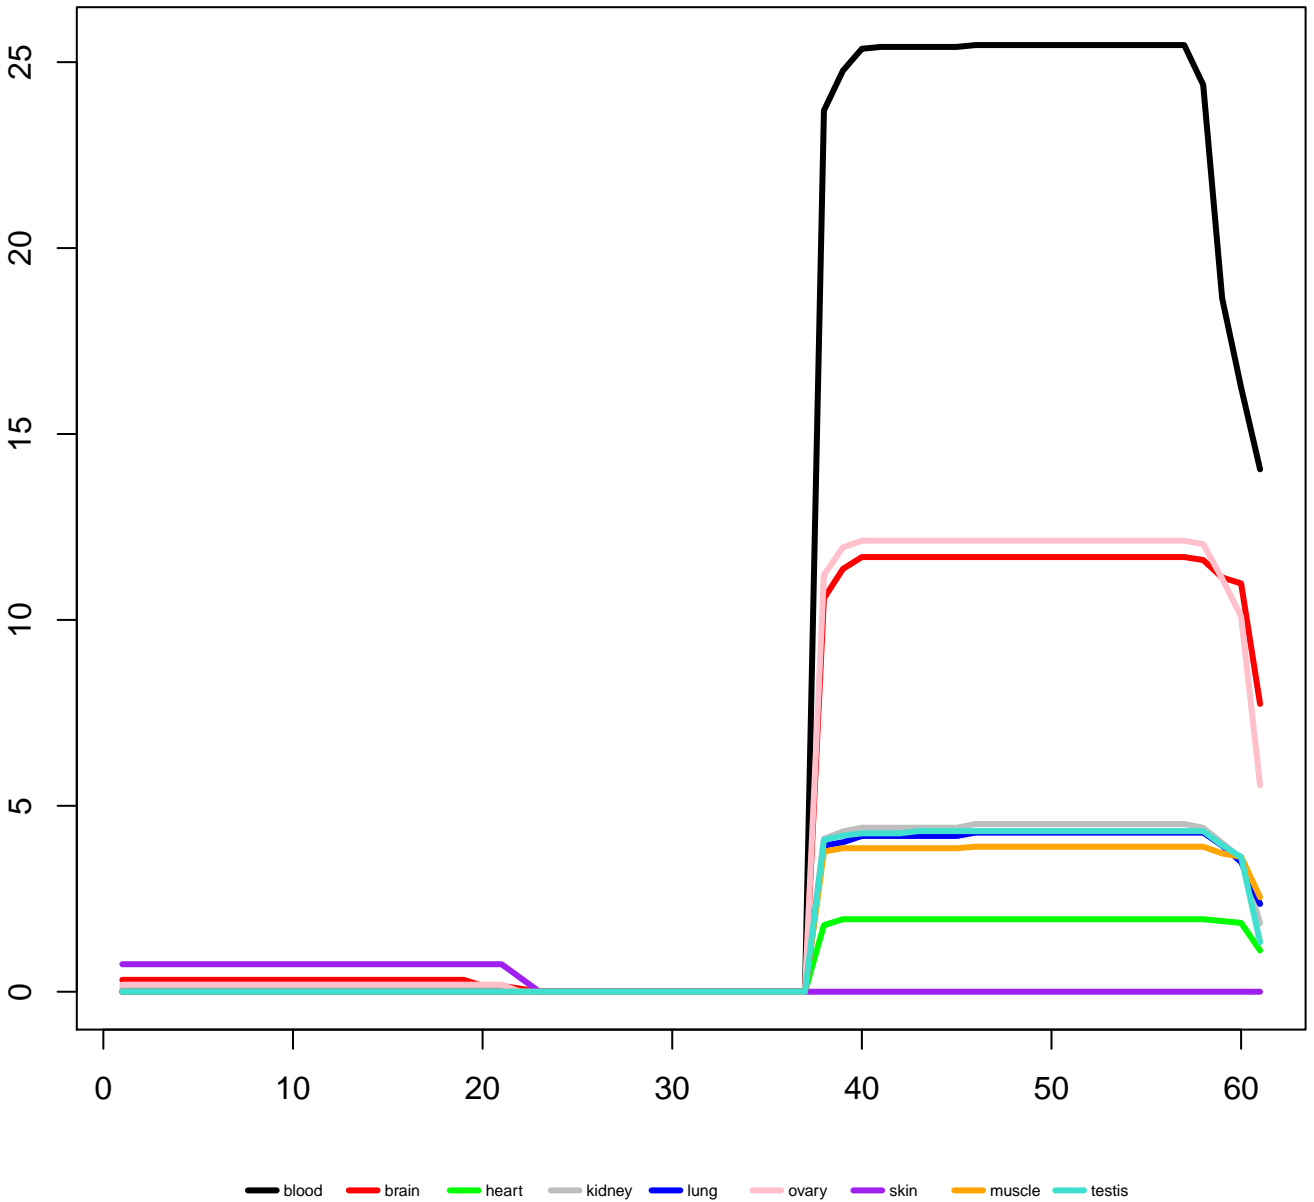

# 38\_17579162-17579290(-)\_cfa-mir-8798\_low



blood brain heart kidney lung ovary skin muscle testis





# 4\_8702838-8702897(-)\_cfa-mir-1841\_high

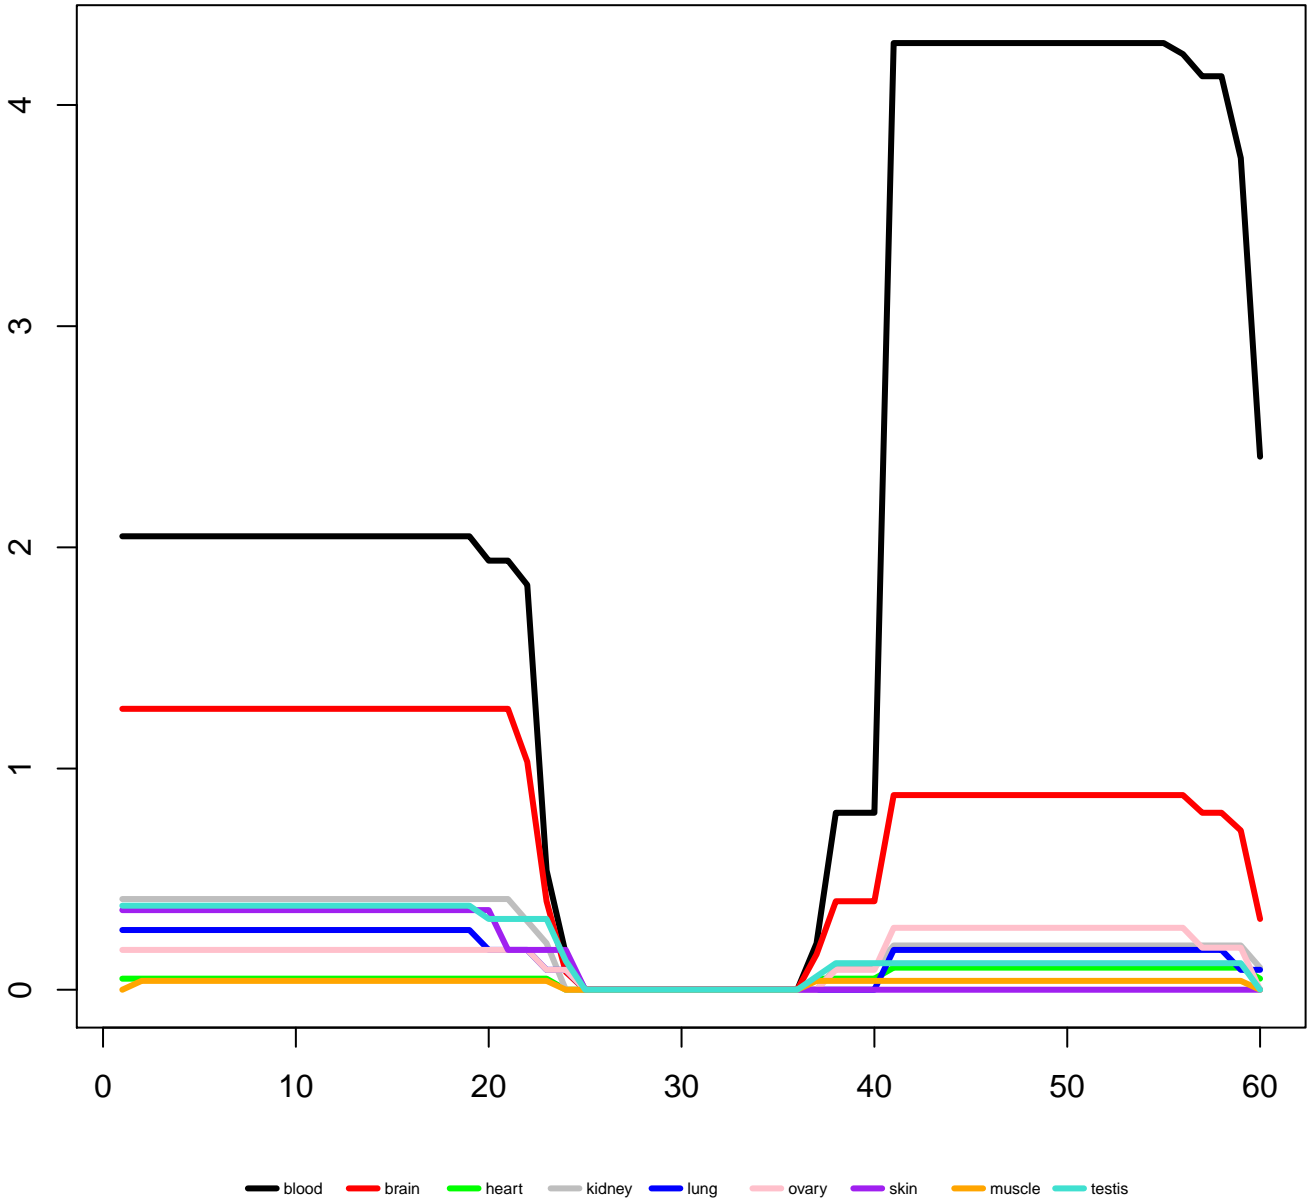

# 4\_15180088-15180212(-)\_cfa-mir-1296\_high

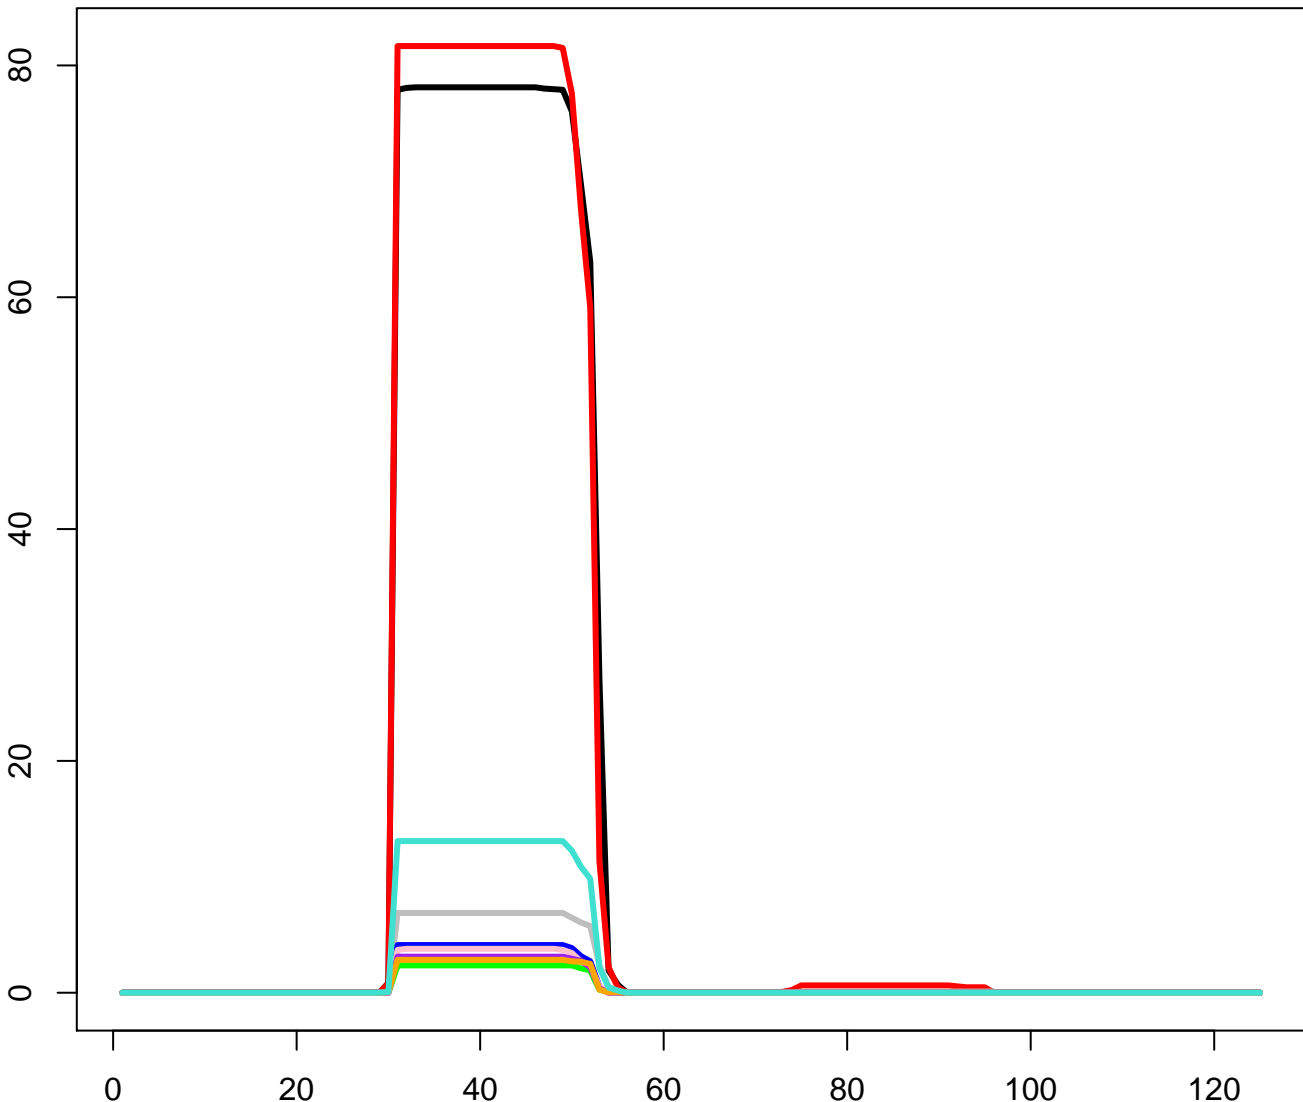

— blood — brain — heart — kidney — lung — ovary — skin — muscle — testis



# 4\_36279254-36279340(+)\_mir-147\_high

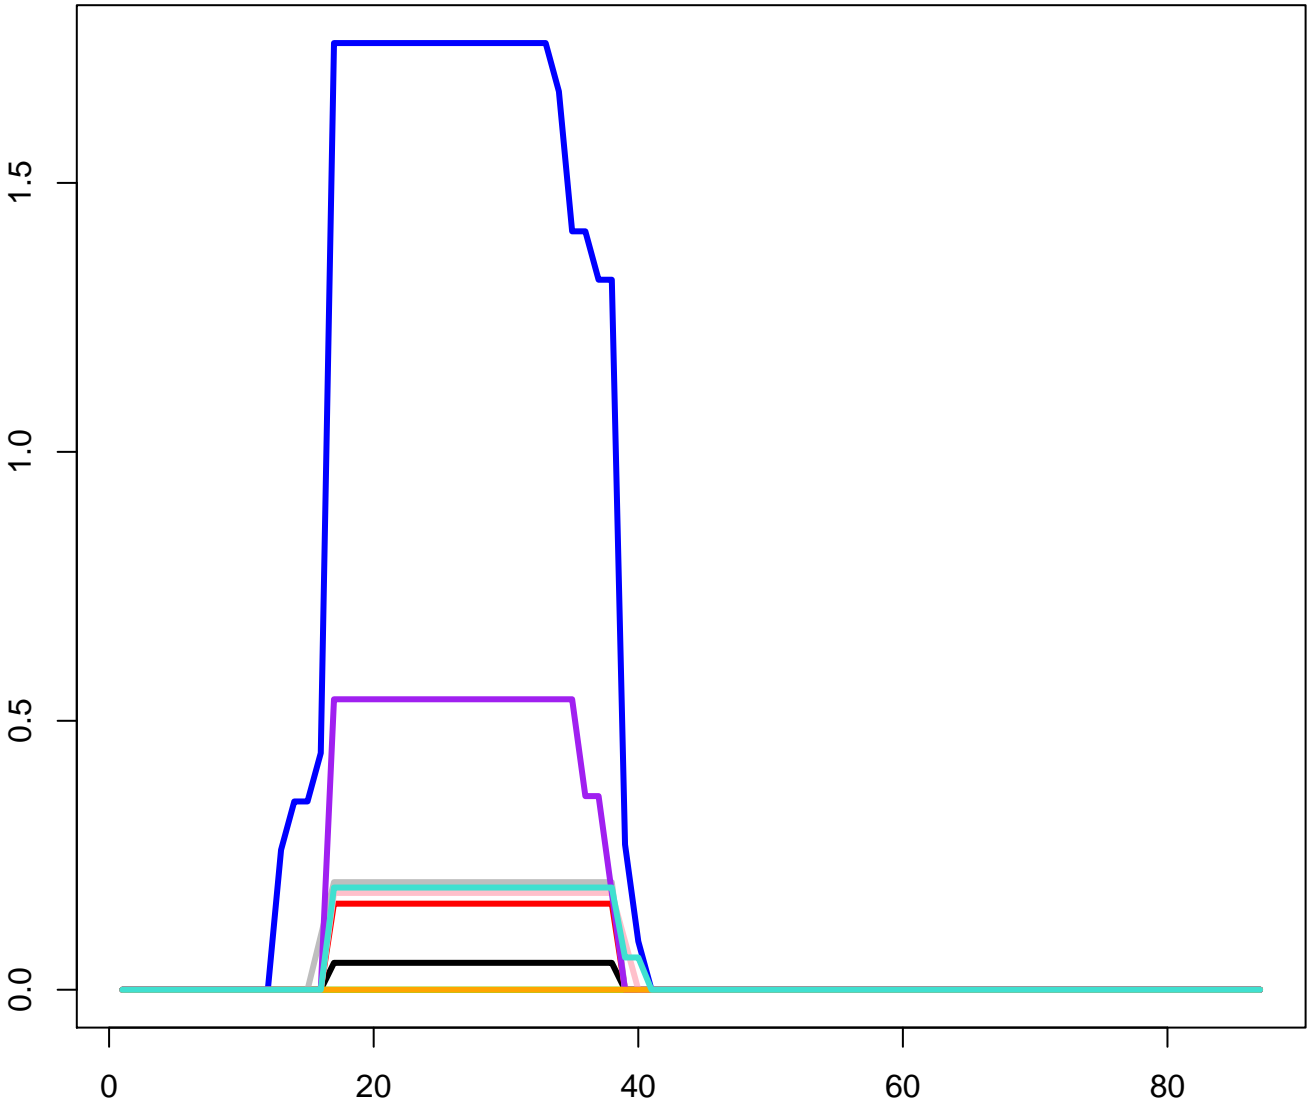

— blood — brain — heart — kidney — lung — ovary — skin — muscle — testis



# 4\_43010775-43010838(+)\_cfa-mir-218-2\_high

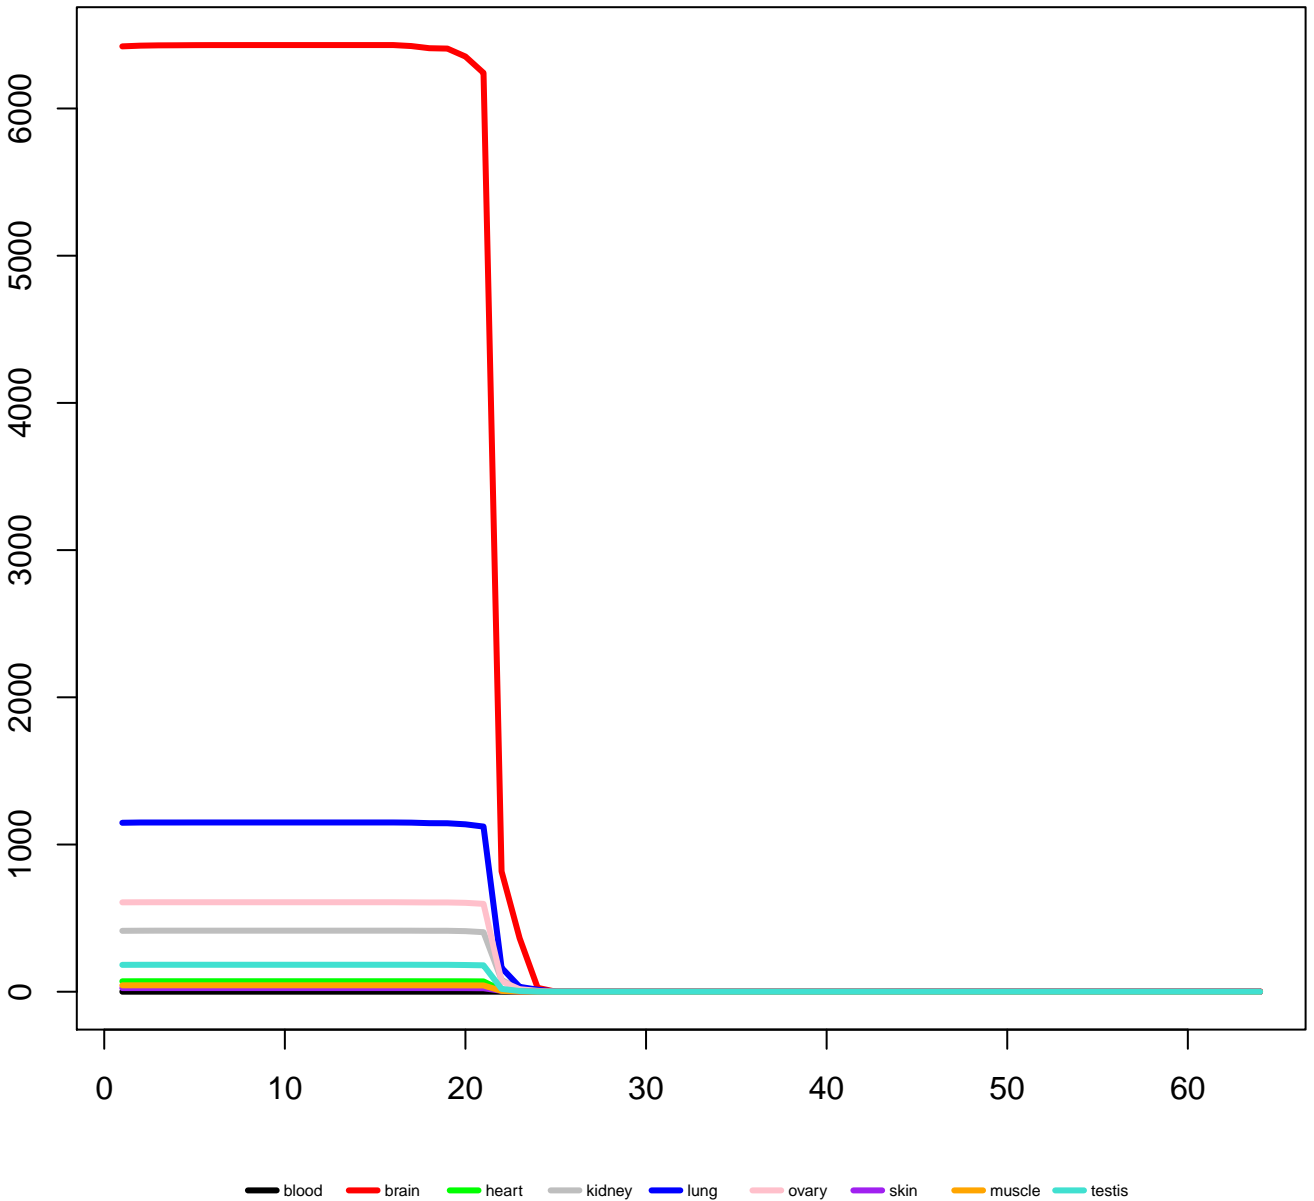

# 4\_43182876-43182937(+)\_cfa-mir-103-1\_high

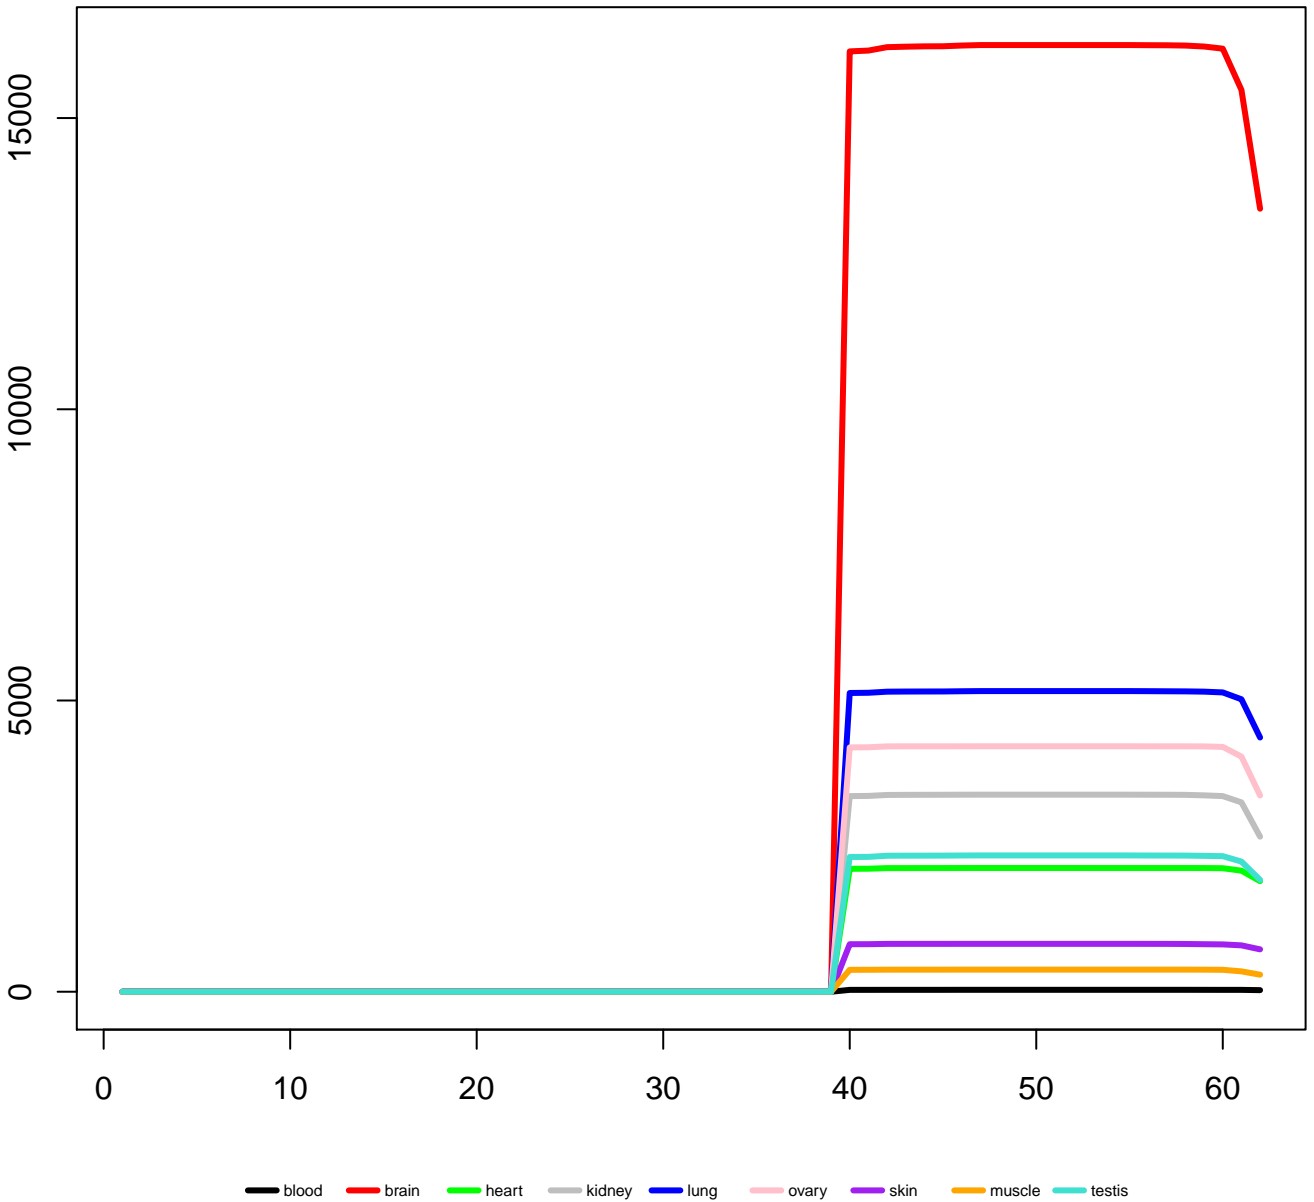



# 4\_50248597-50248654(-)\_cfa-mir-146a\_high

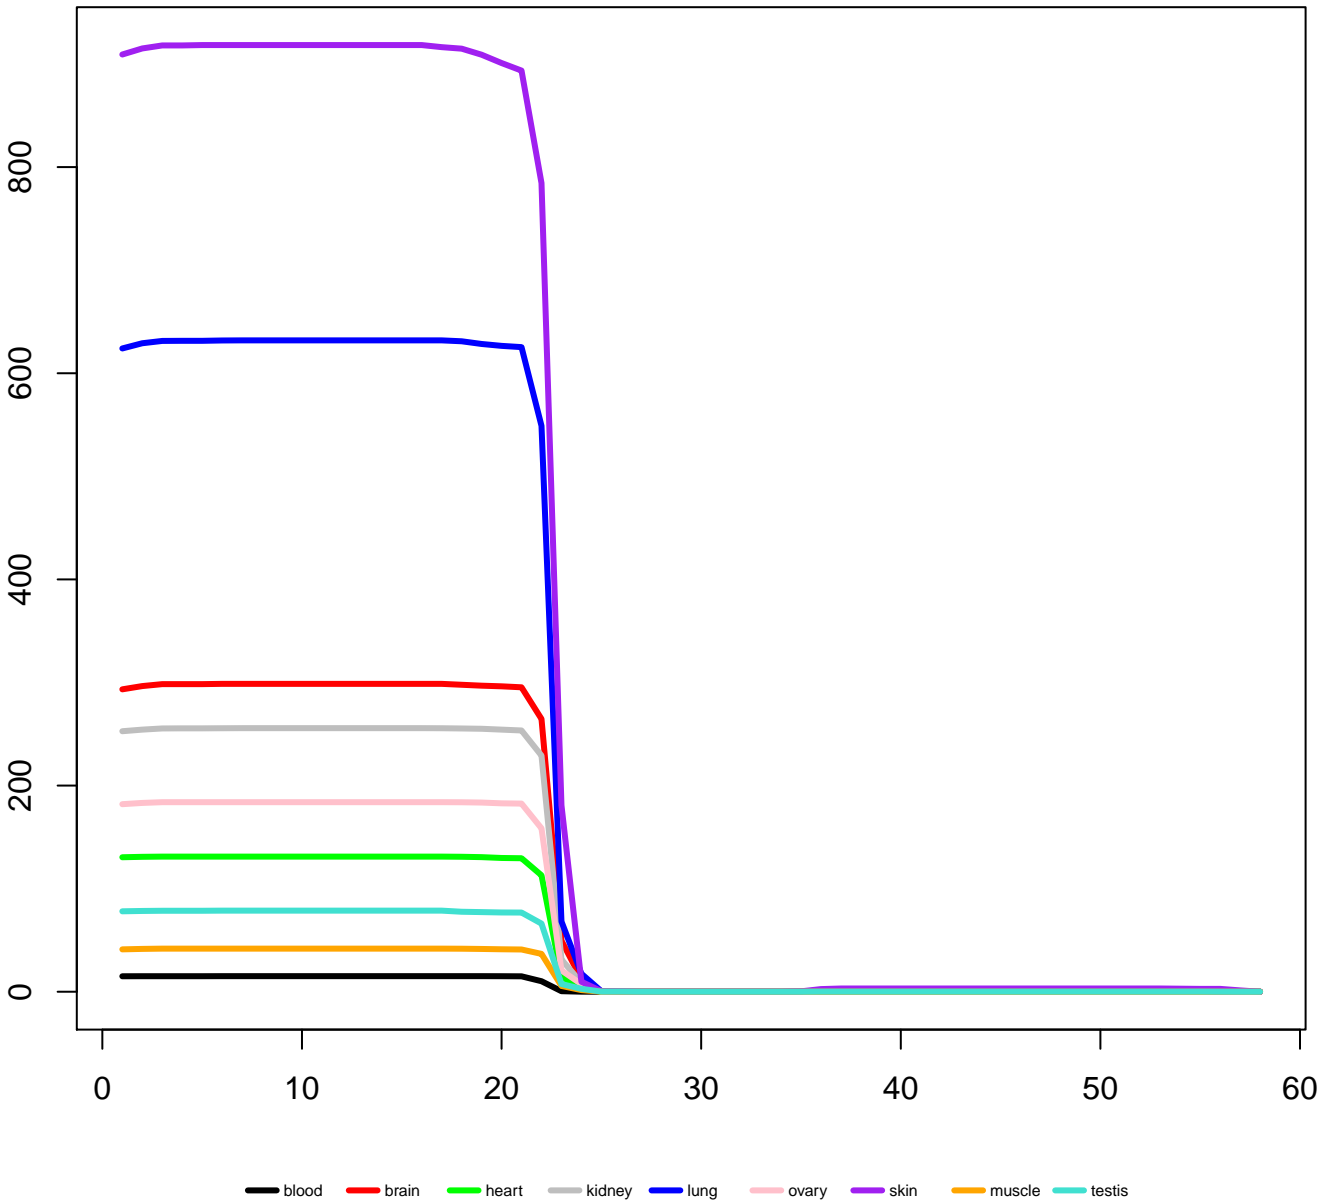

# 4\_50474008-50474112(+)\_cfa-mir-8902\_high

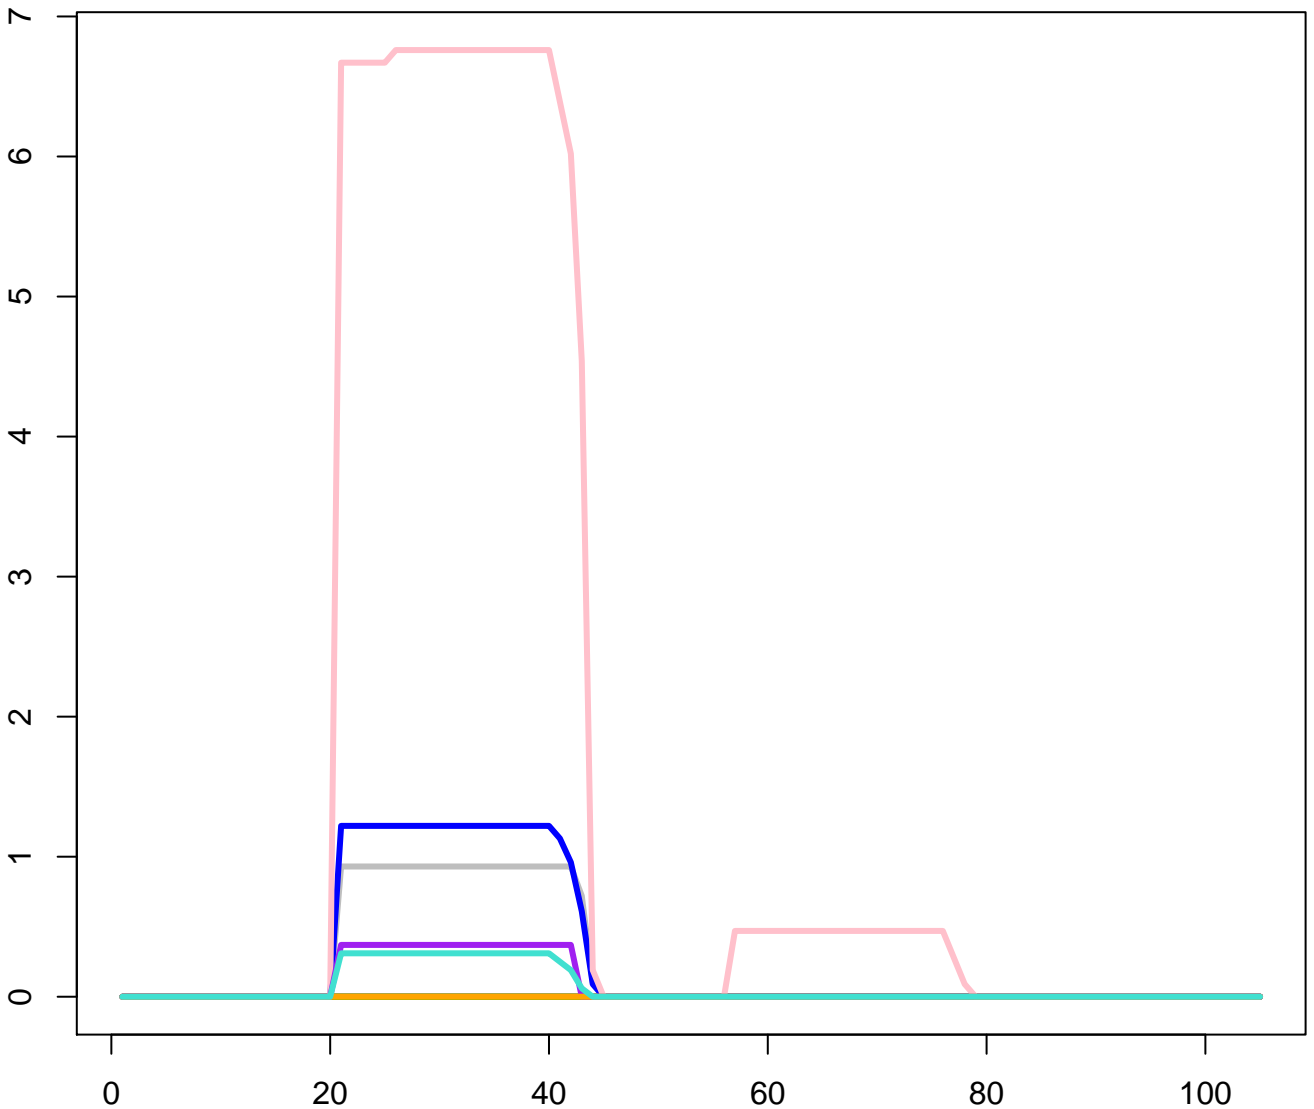

— blood — brain — heart — kidney — lung — ovary — skin — muscle — testis

# 4\_58838021-58838088(+)\_mir-6982\_low

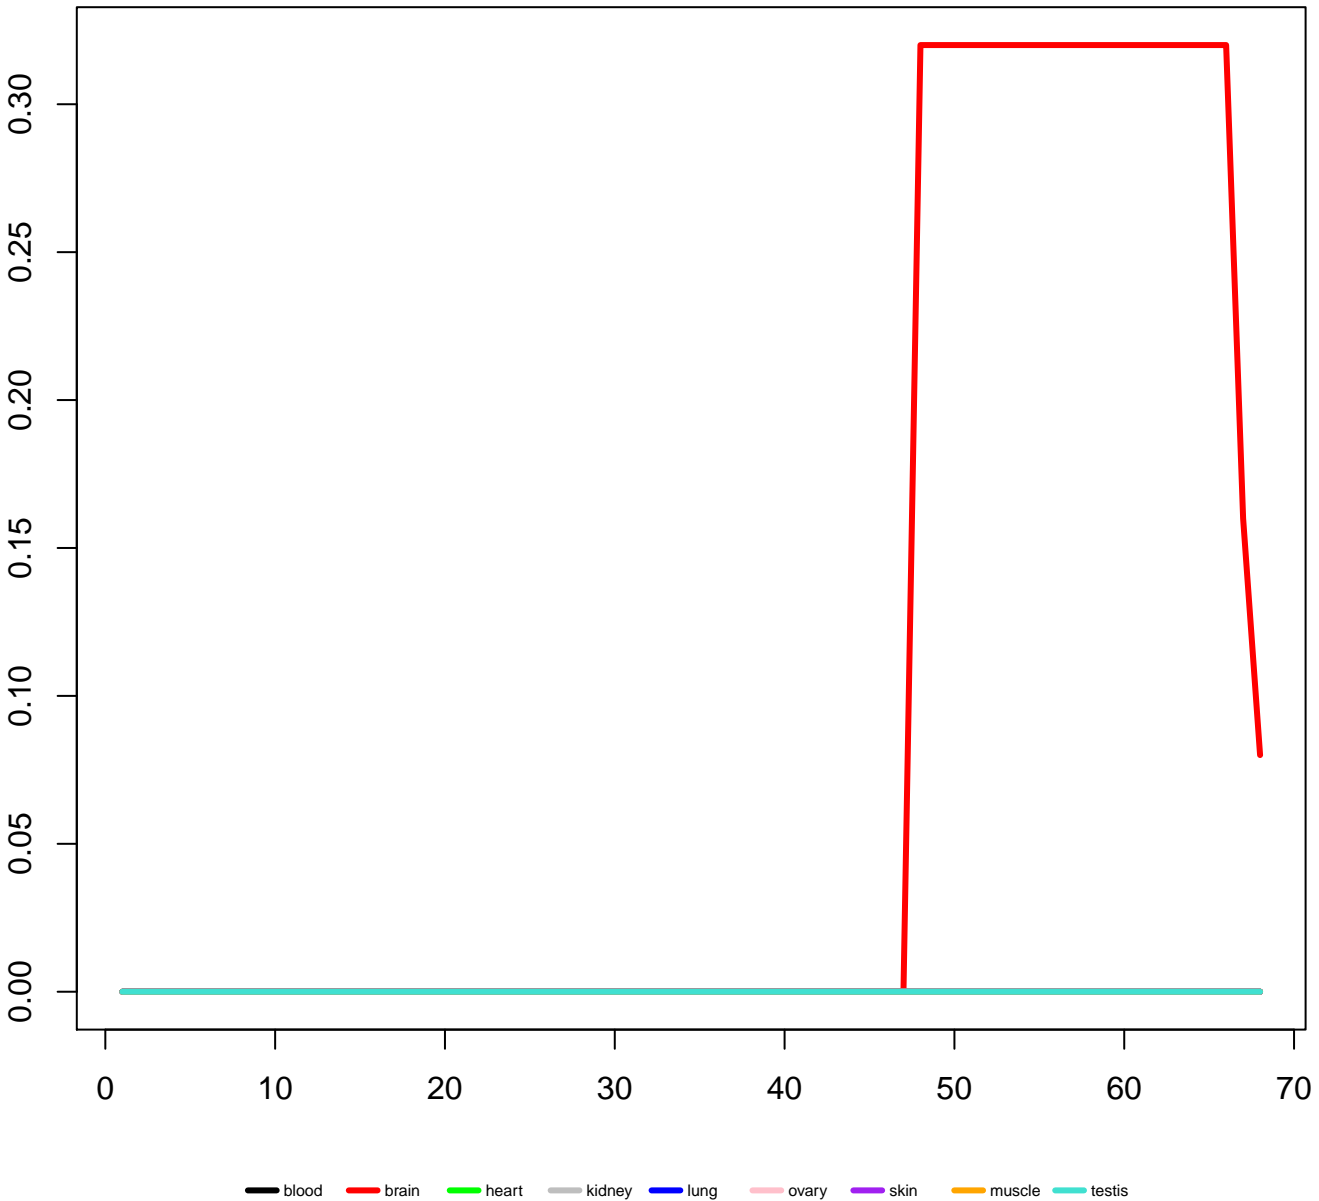

# 4\_59276347-59276406(-)\_cfa-mir-378\_high

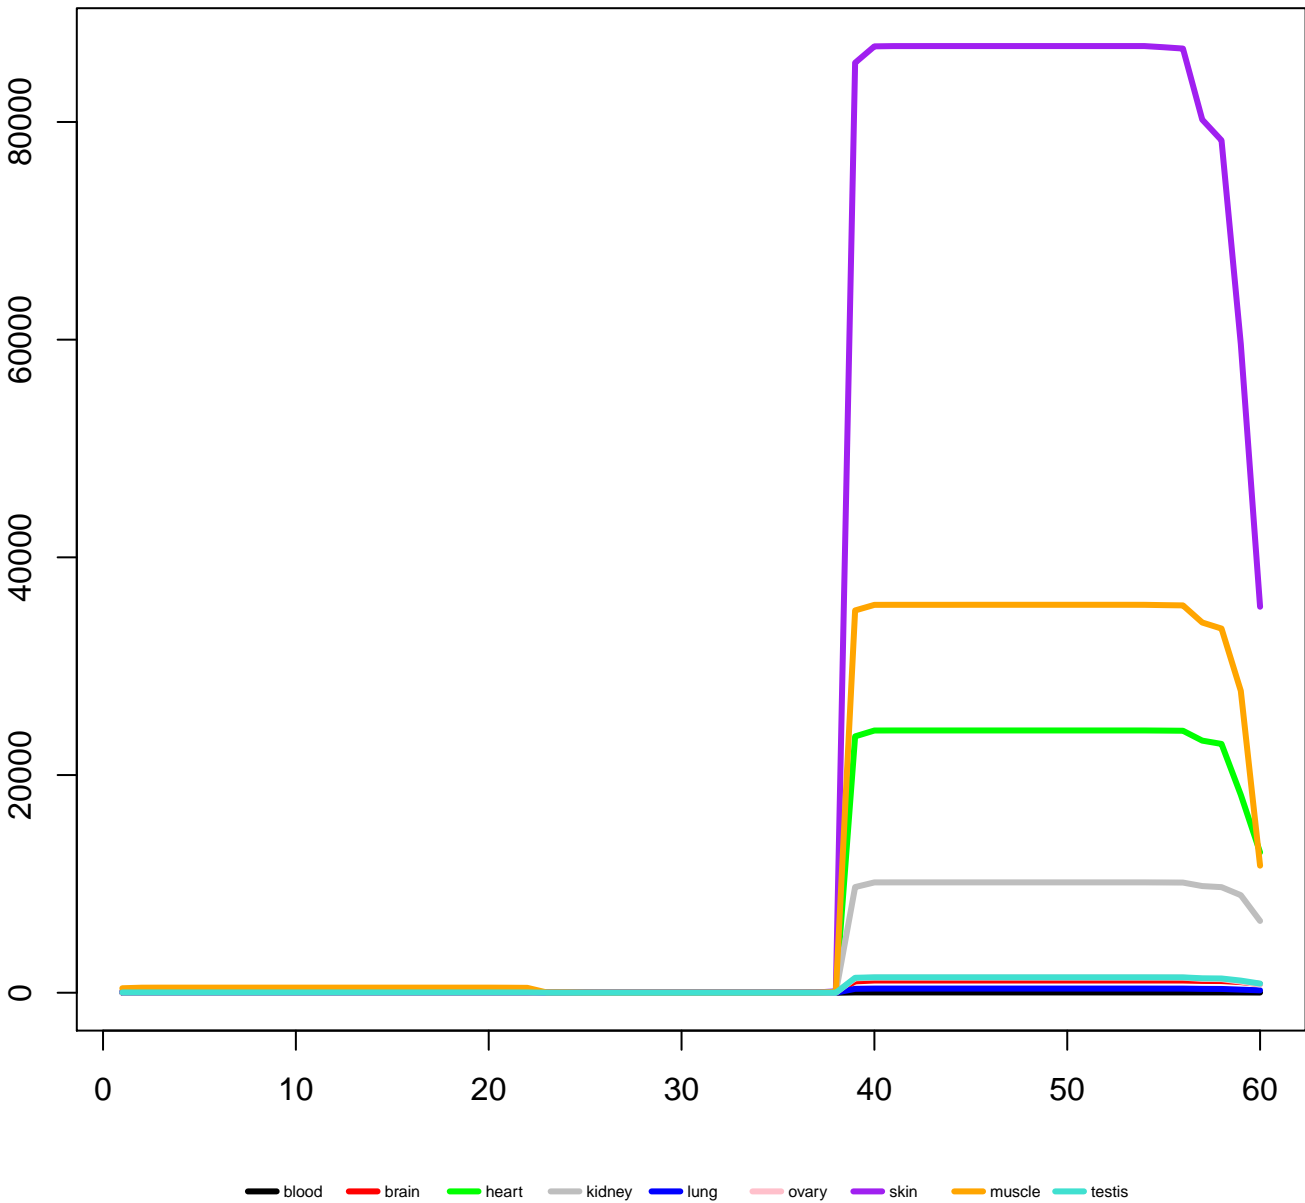

# 4\_59533128-59533210(-)\_cfa-mir-145\_high

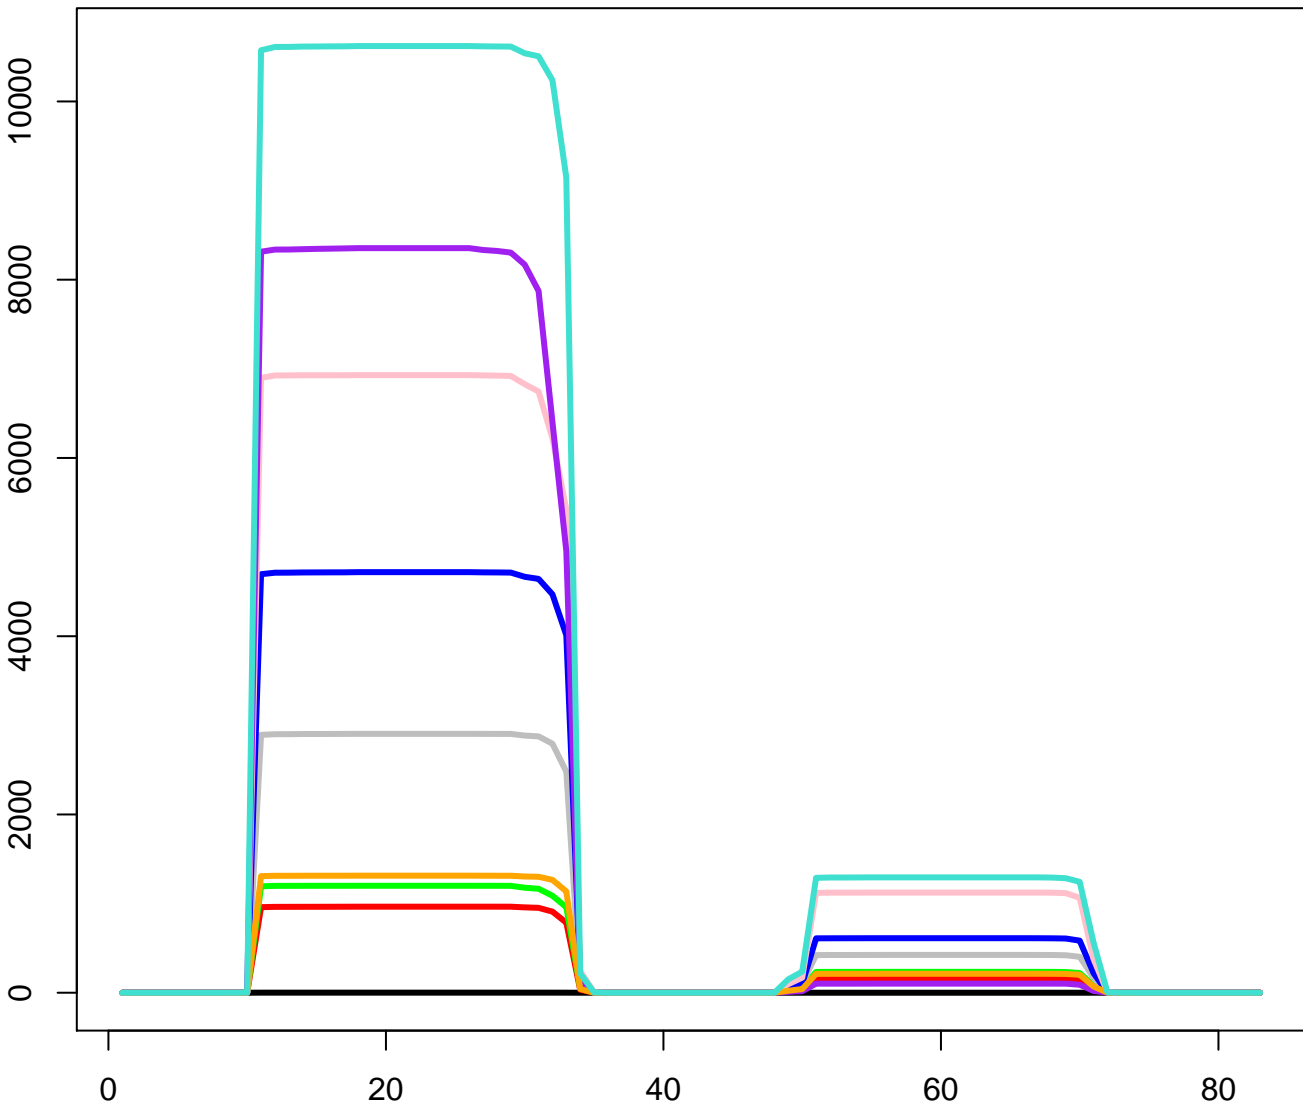

blood brain heart kidney lung ovary skin muscle testis



# 4\_75097832-75097903(+)\_mir-1898\_low

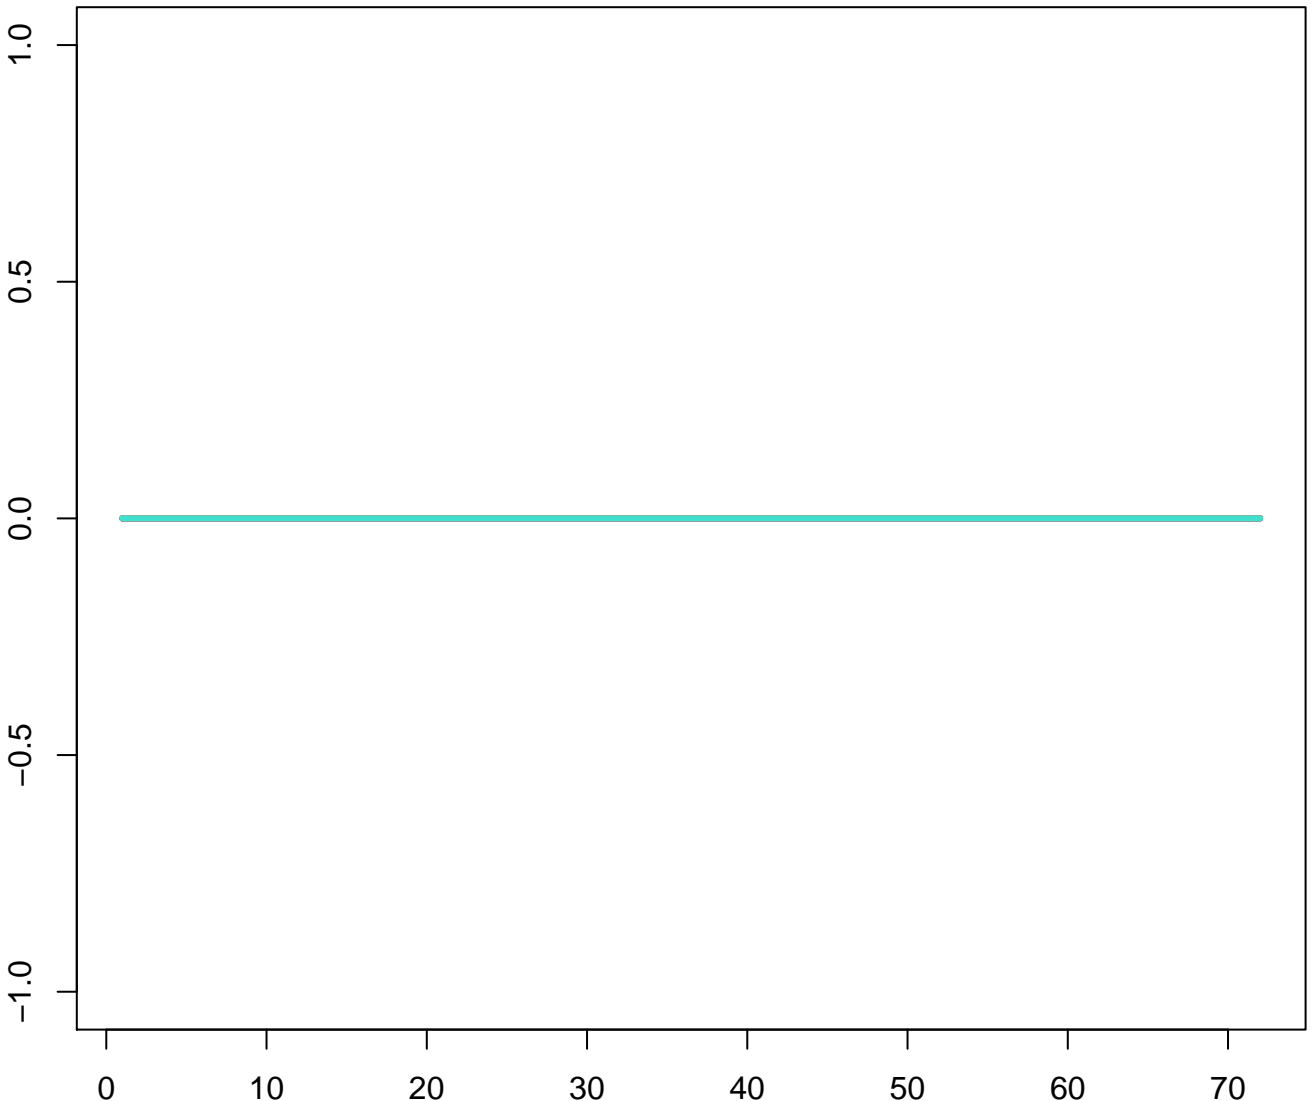

blood brain heart kidney lung ovary skin muscle testis





# 5\_1012814-1012958(-)\_cfa-mir-8868\_low



blood brain heart kidney lung ovary skin muscle testis

# 5\_12047369-12047425(+)\_cfa-mir-99a-2\_high

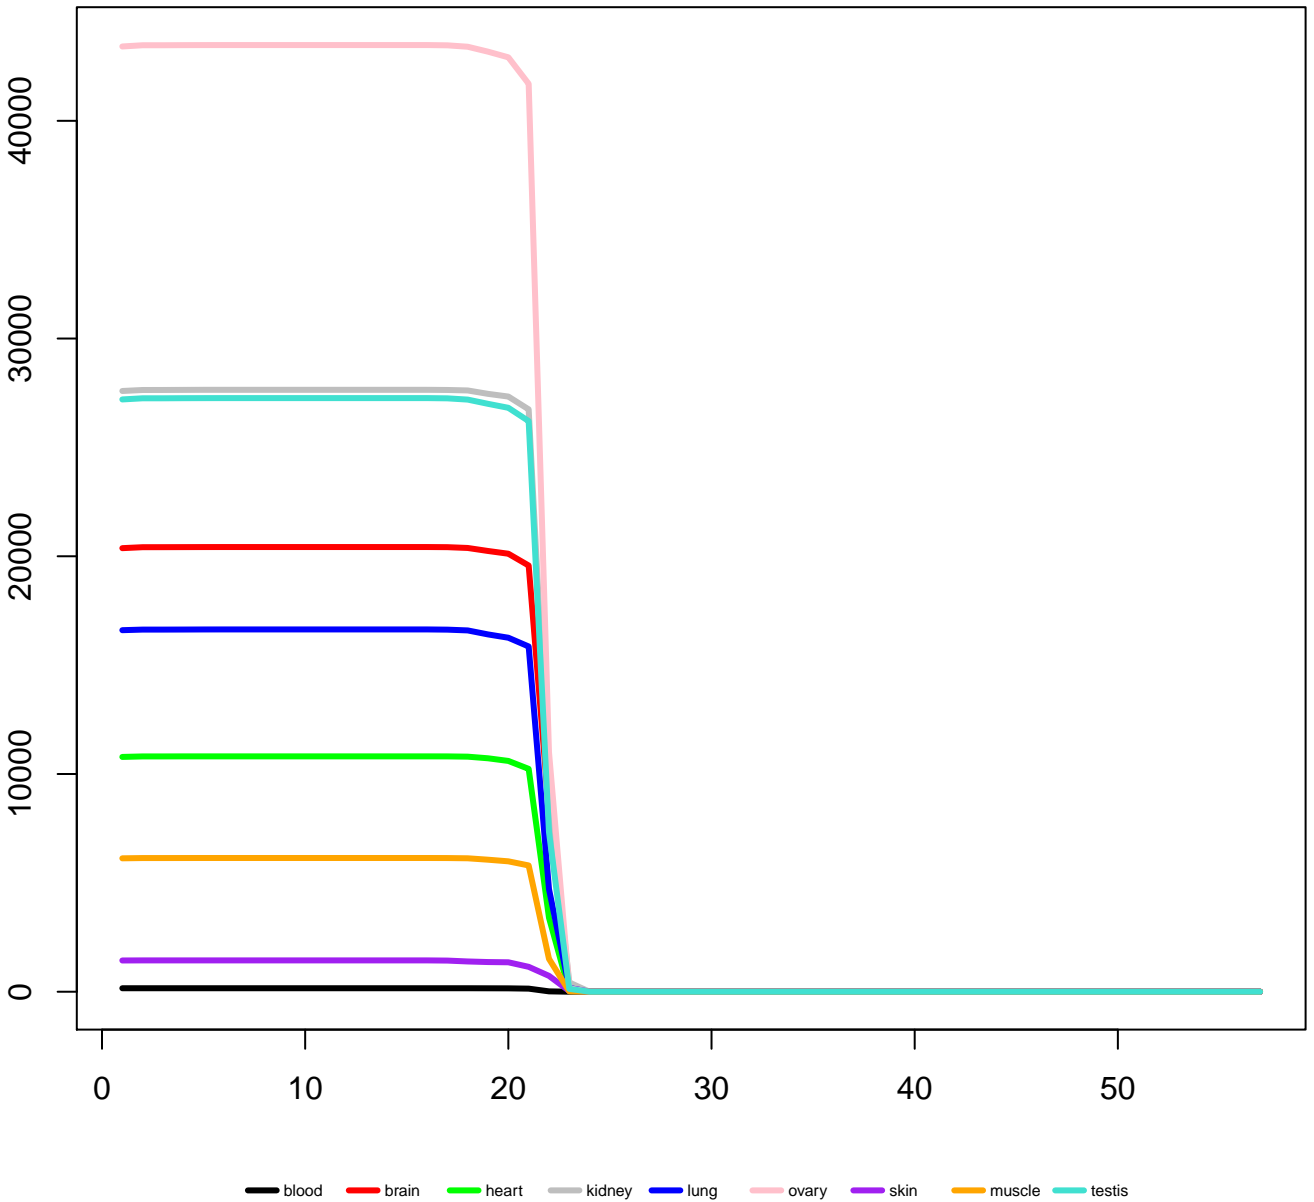

# 5\_12052786-12052881(+)\_cfa-let-7a-2\_high

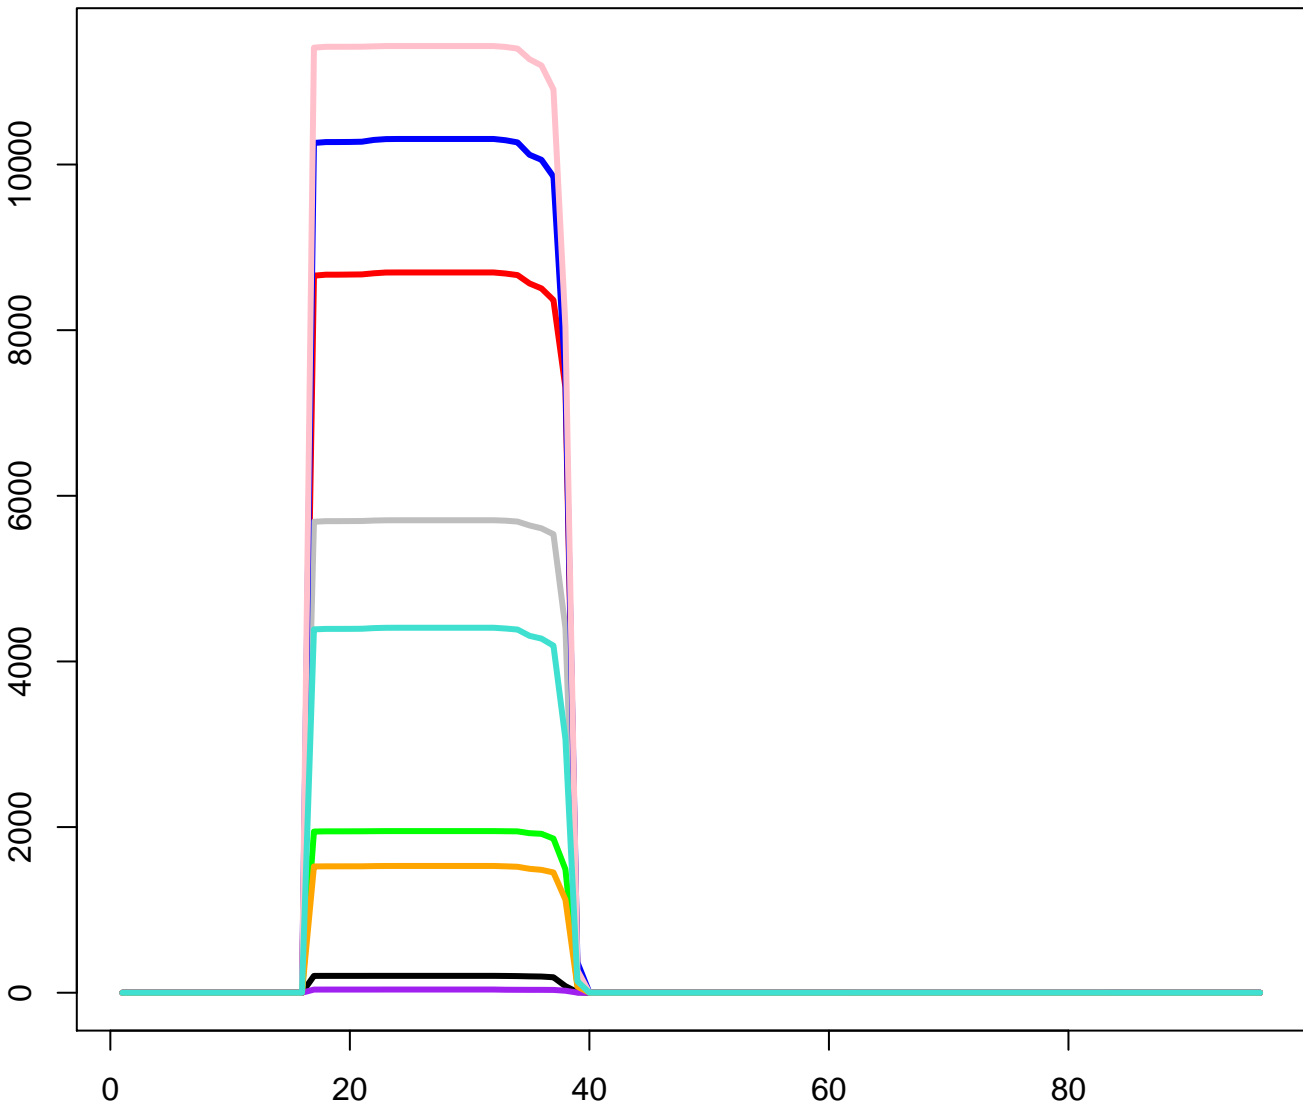

— blood — brain — heart — kidney — lung — ovary — skin — muscle — testis



# 5\_16420822-16420966(-)\_cfa-mir-8871\_low

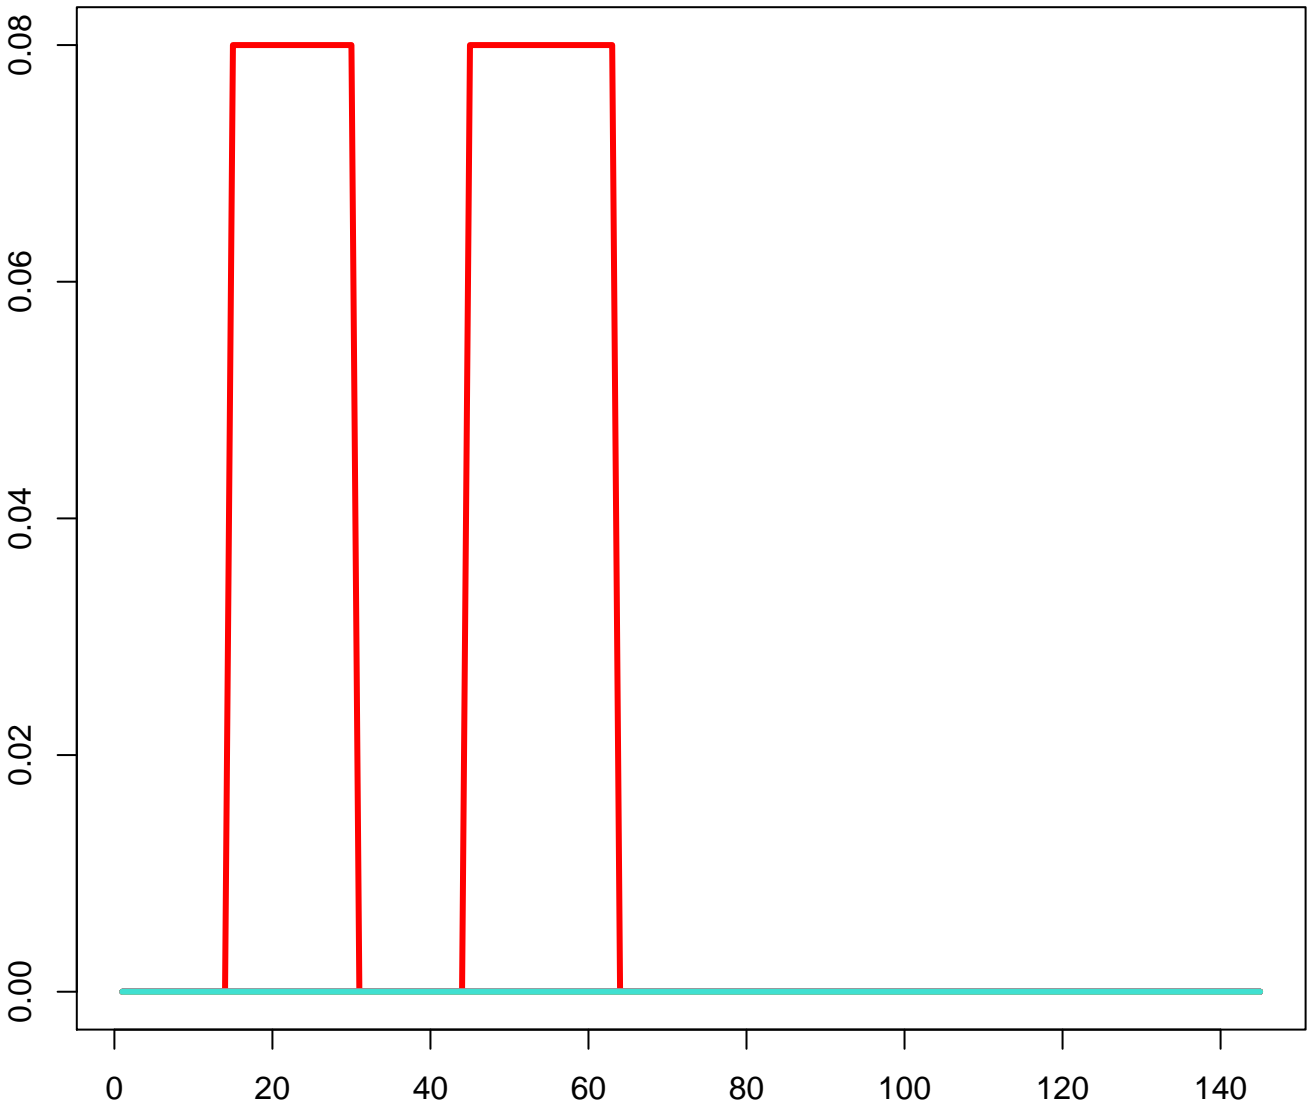

— blood — brain — heart — kidney — lung — ovary — skin — muscle — testis

# 5\_18630015-18630096(-)\_mir-1244\_low

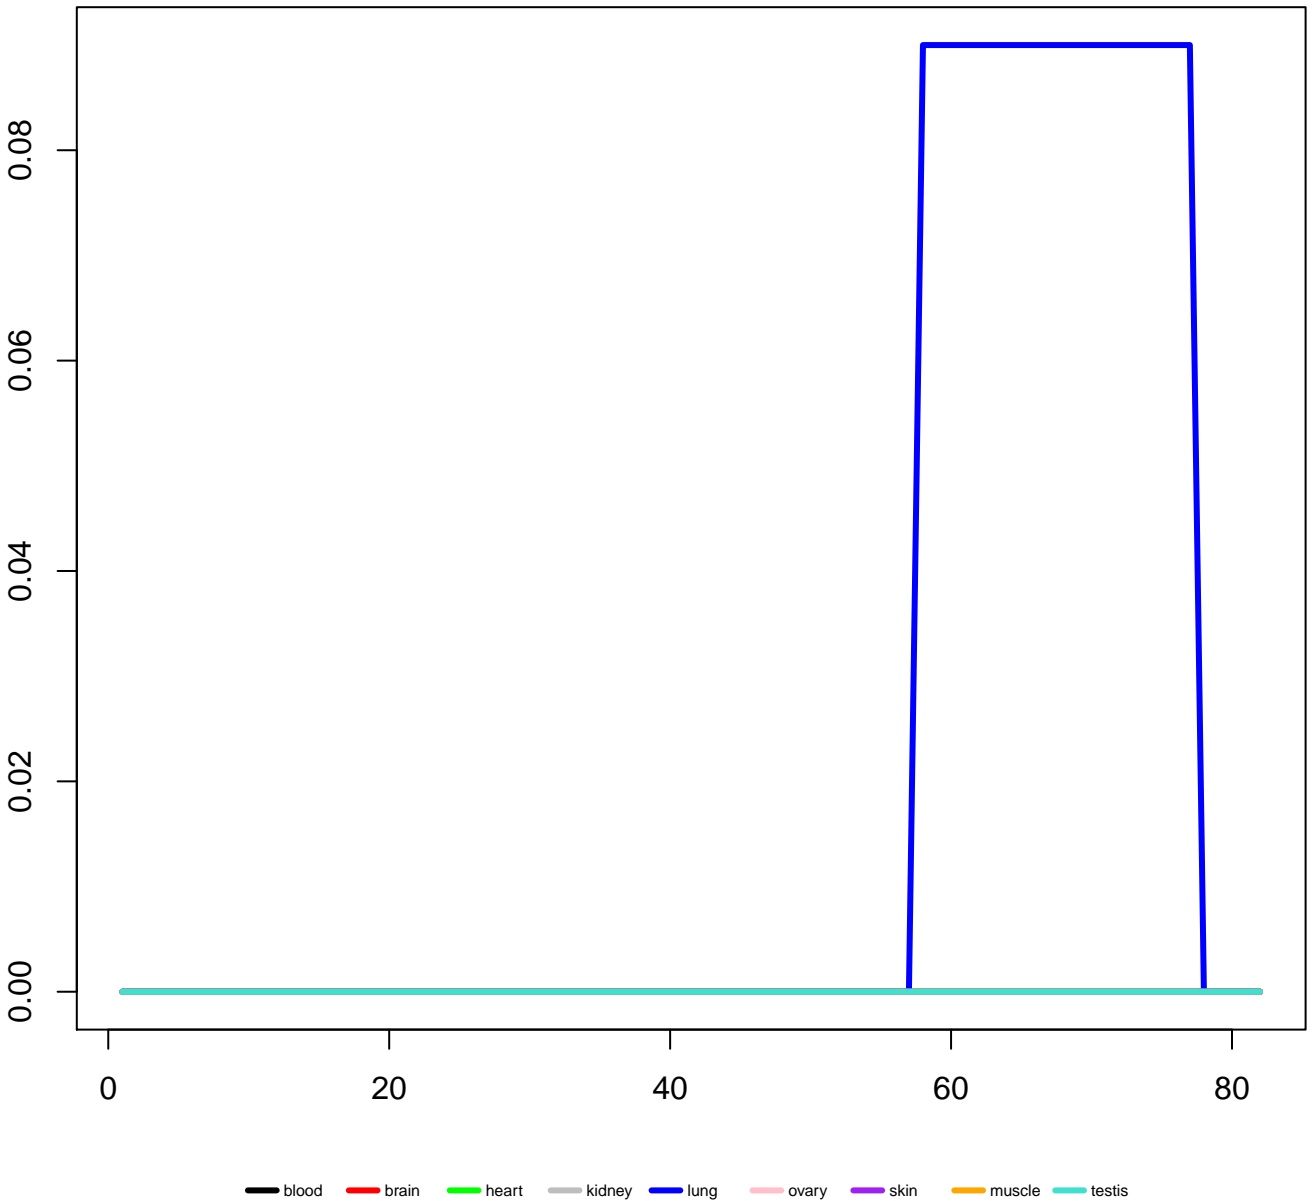

# 5\_21558106-21558160(-)\_cfa-mir-34c\_high

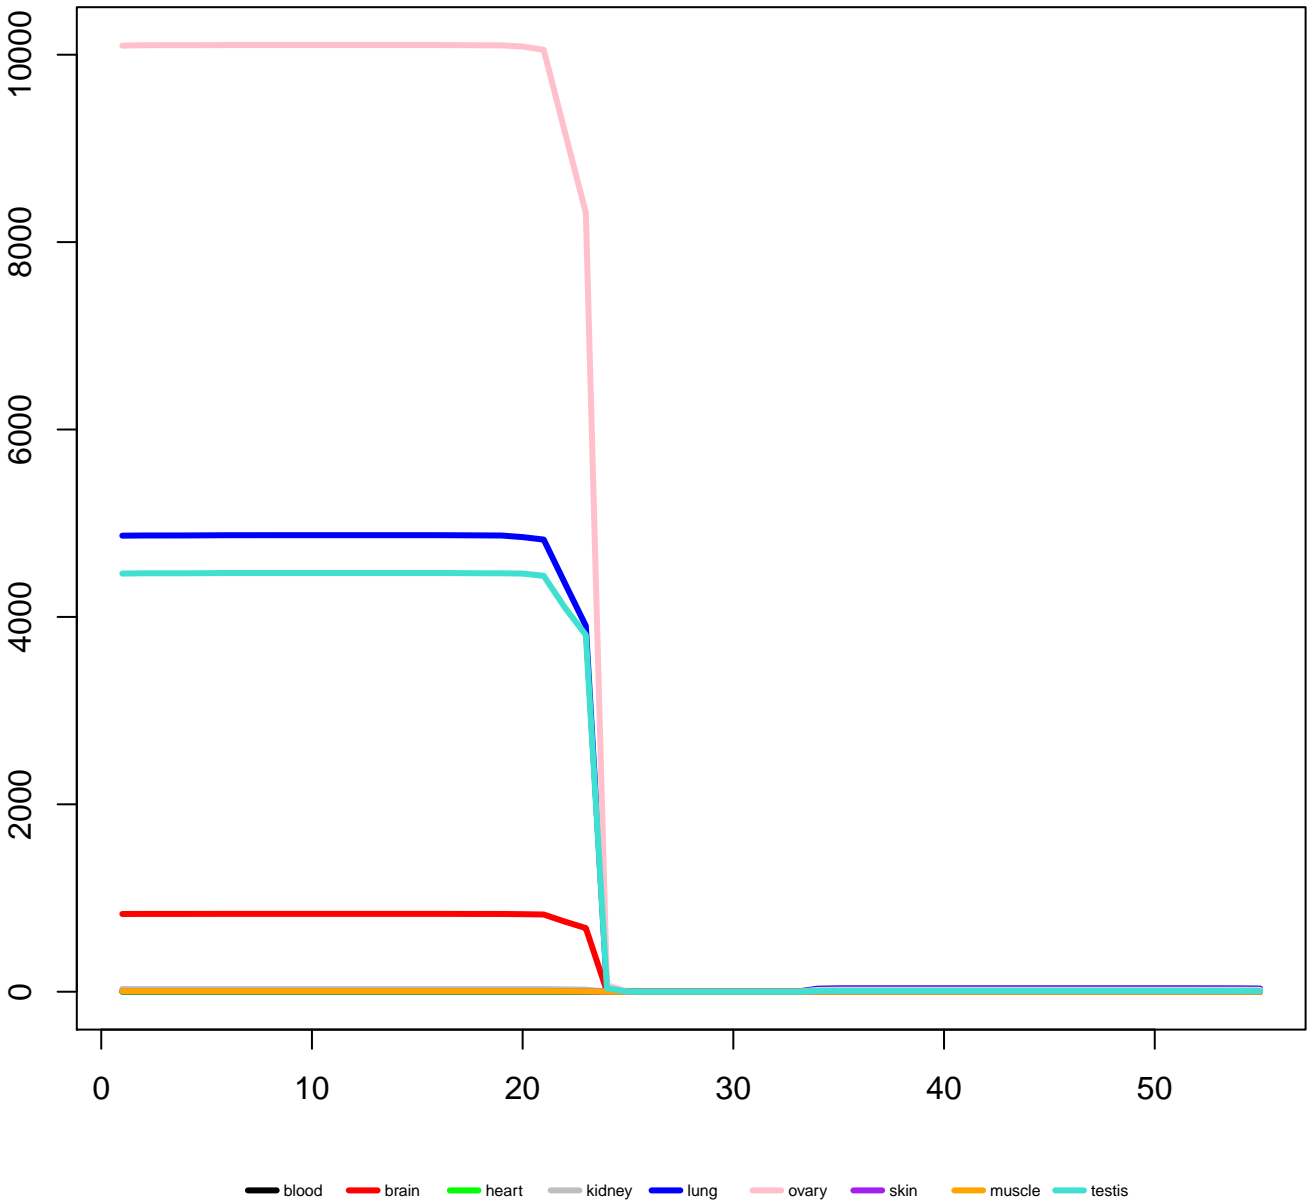

# 5\_21558685-21558768(-)\_cfa-mir-34b\_high

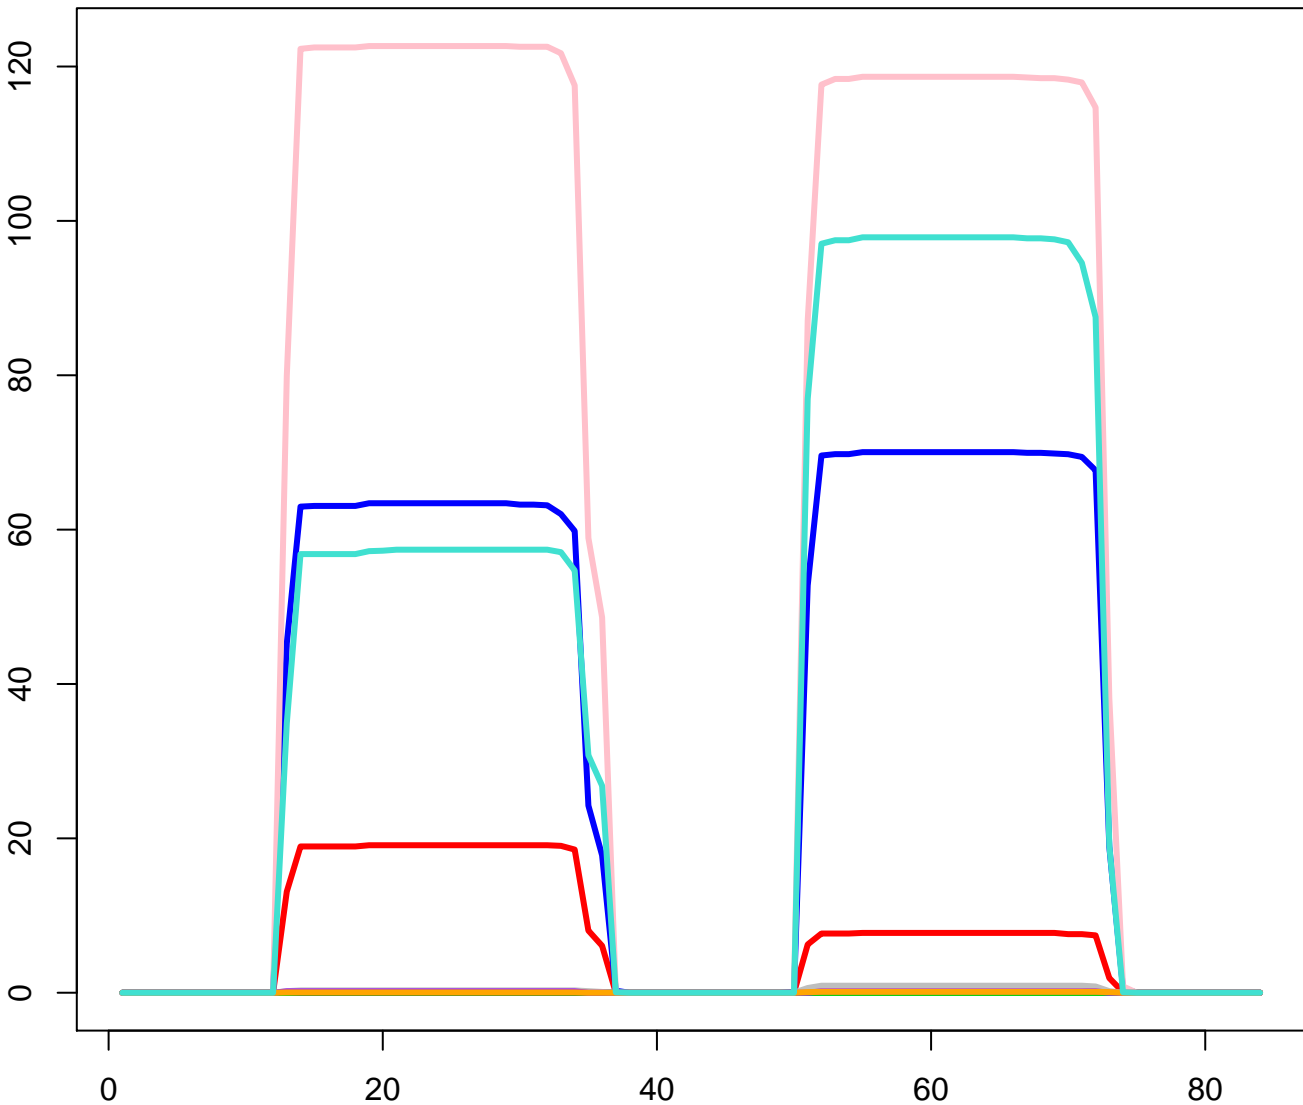

blood brain heart kidney lung ovary skin muscle testis



# 5\_26311212-26311288(-)\_mir-2985\_low

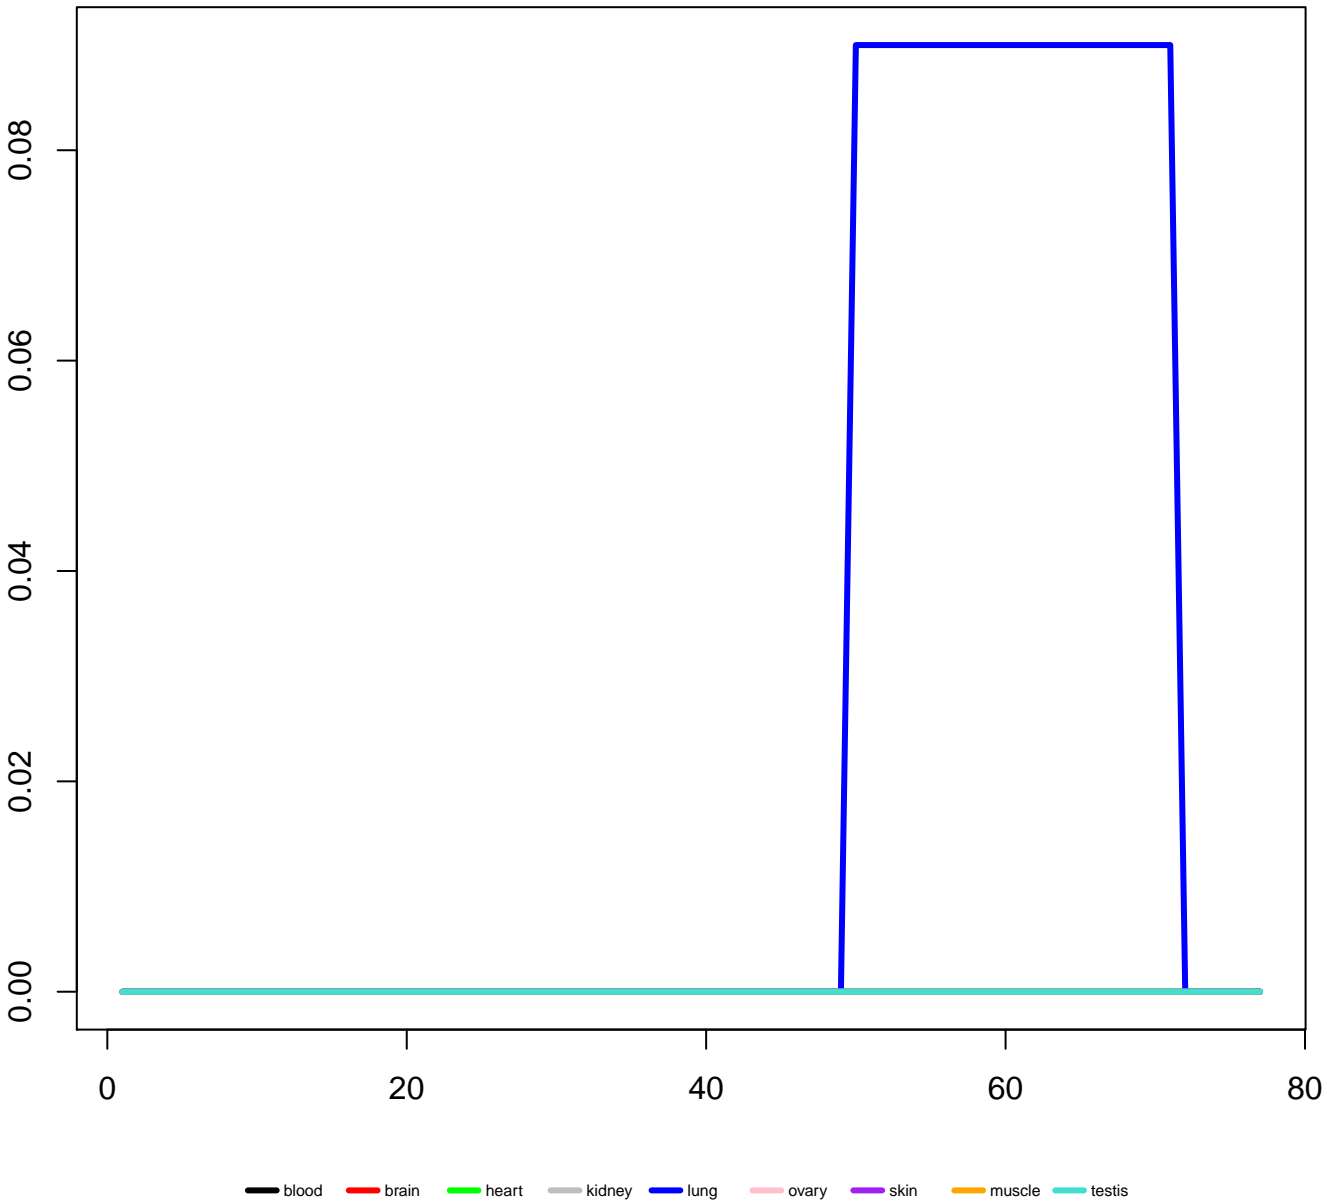

# 5\_31002729-31002857(-)\_cfa-mir-8870\_low

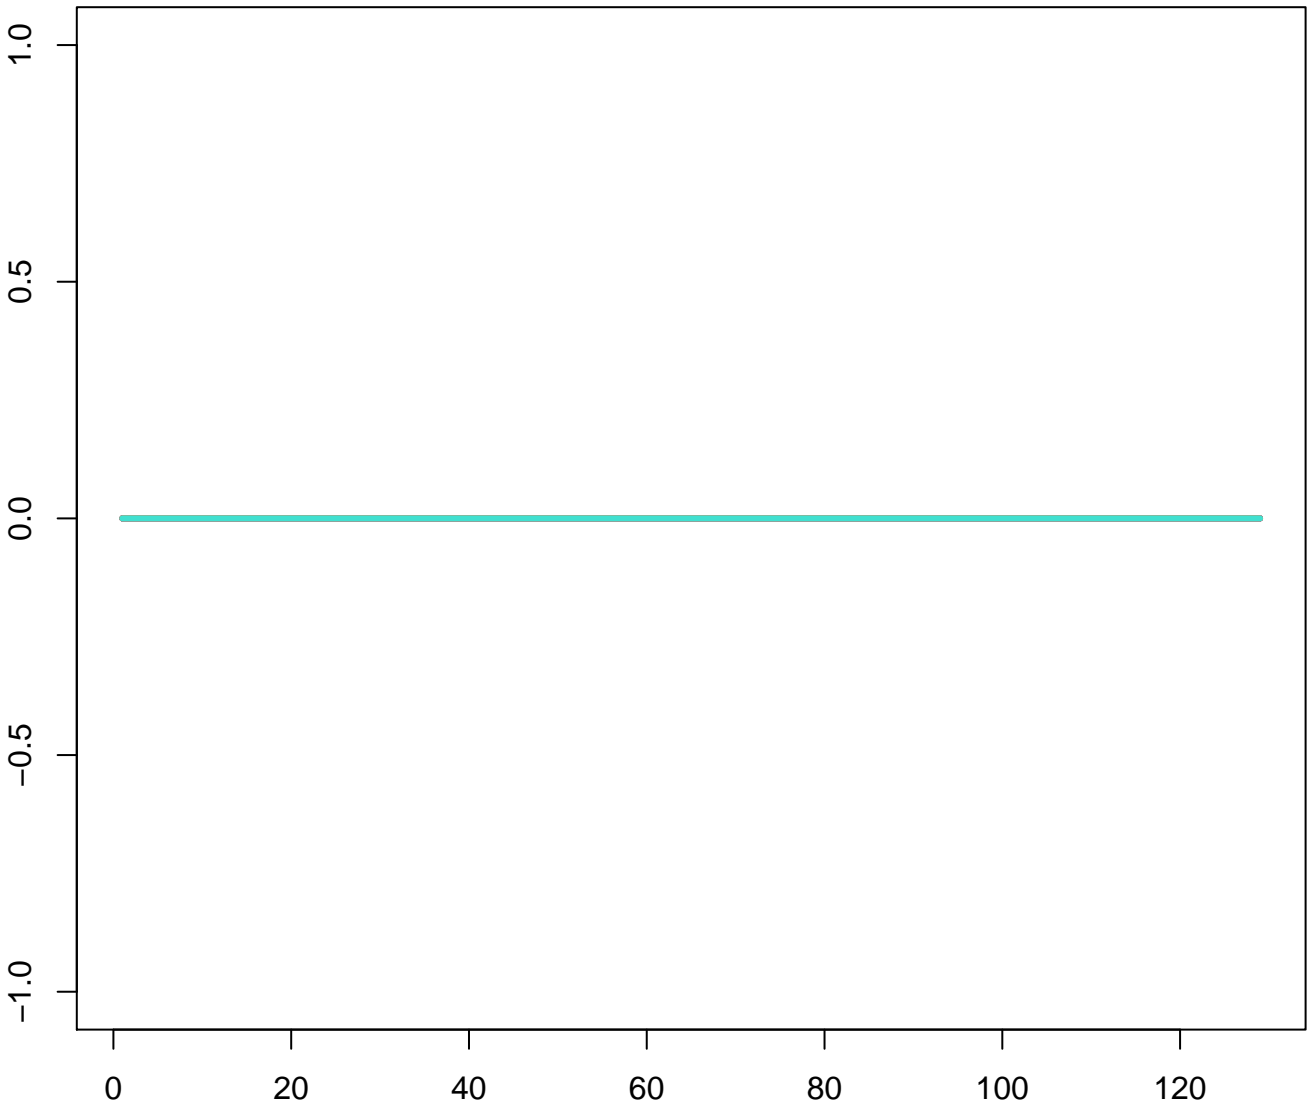

blood brain heart kidney lung ovary skin muscle testis

# 5\_32045450-32045510(-)\_cfa-mir-195\_high

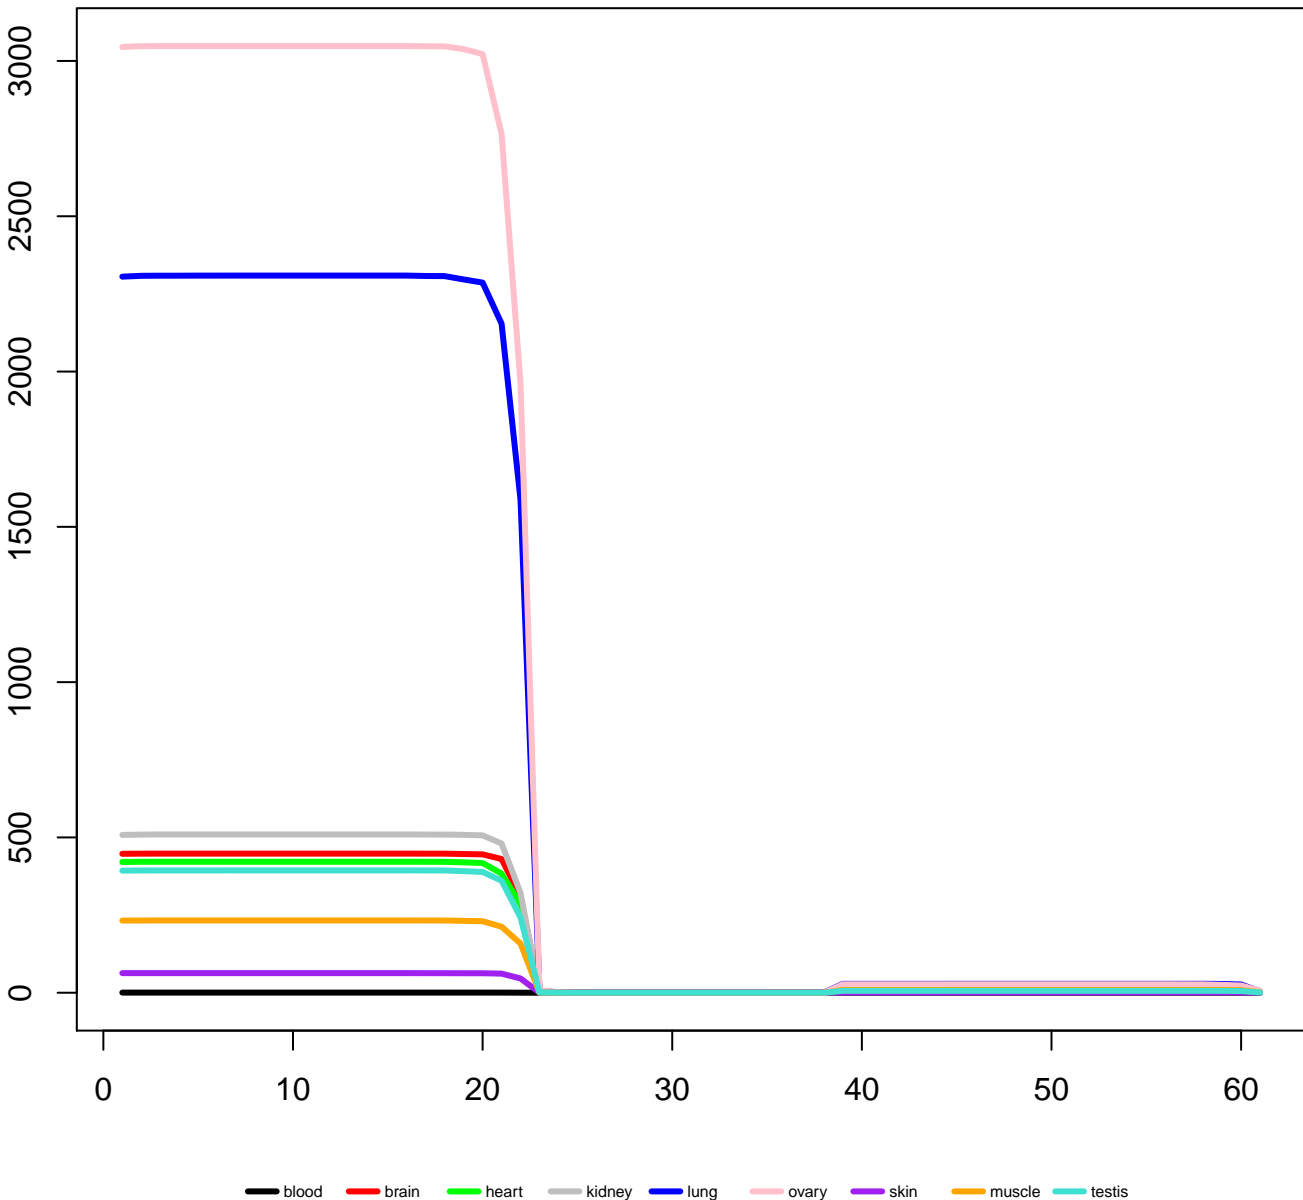



# 5\_32192273-32192340(-)\_cfa-mir-324\_high

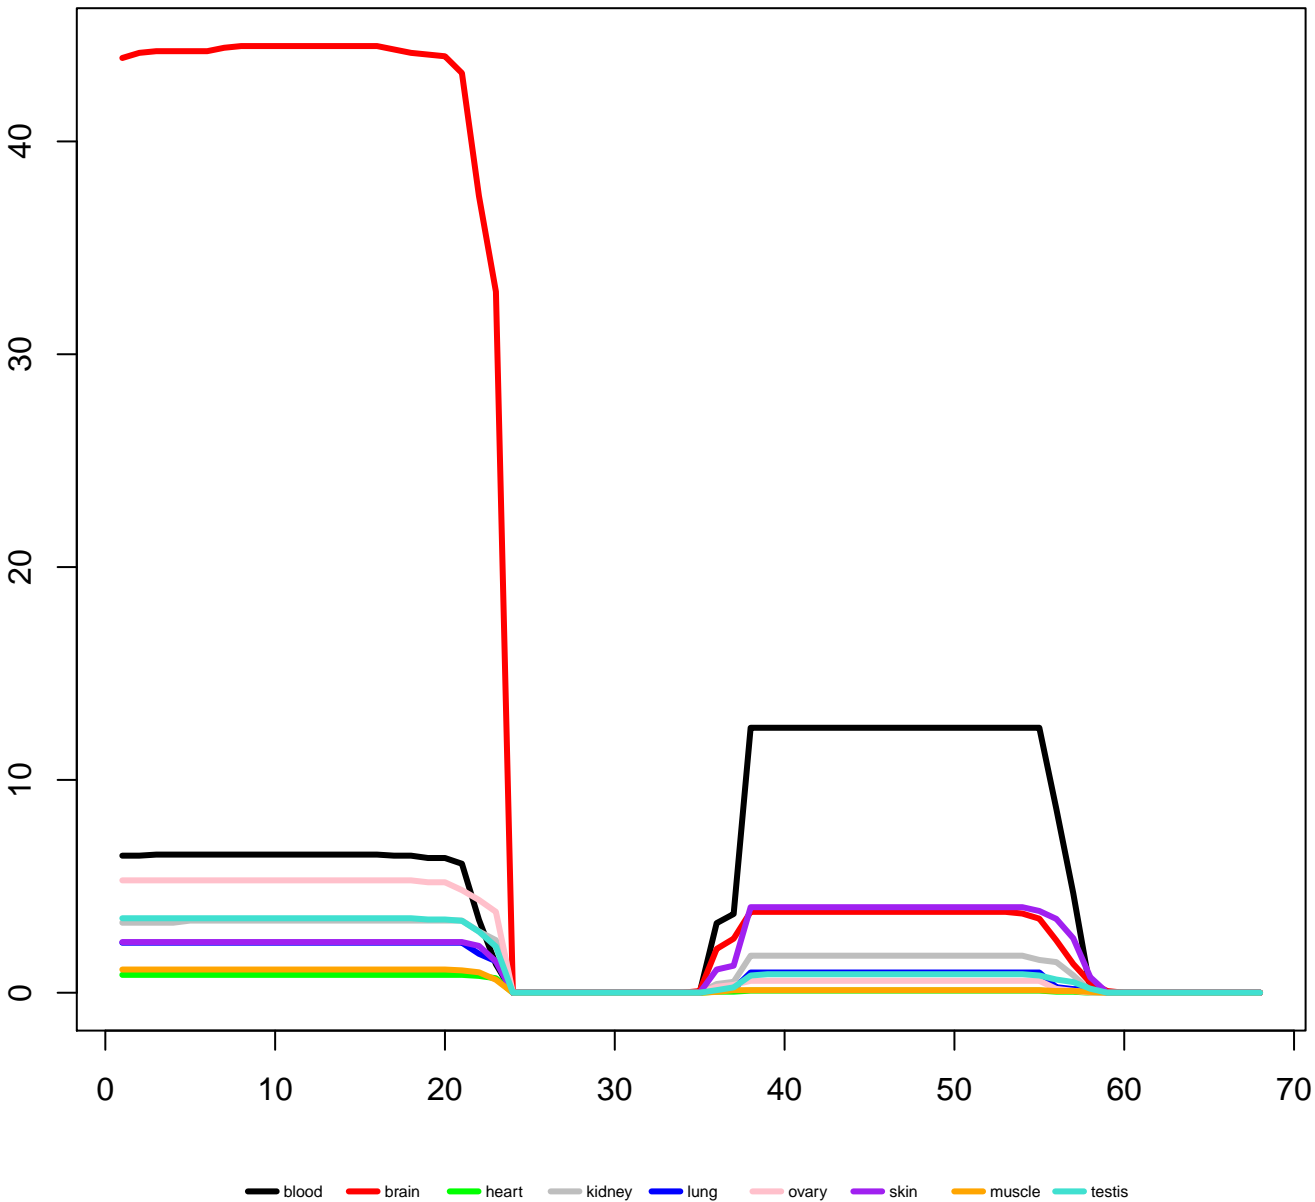

# 5\_32715835-32715975(+)\_cfa-mir-8867\_low

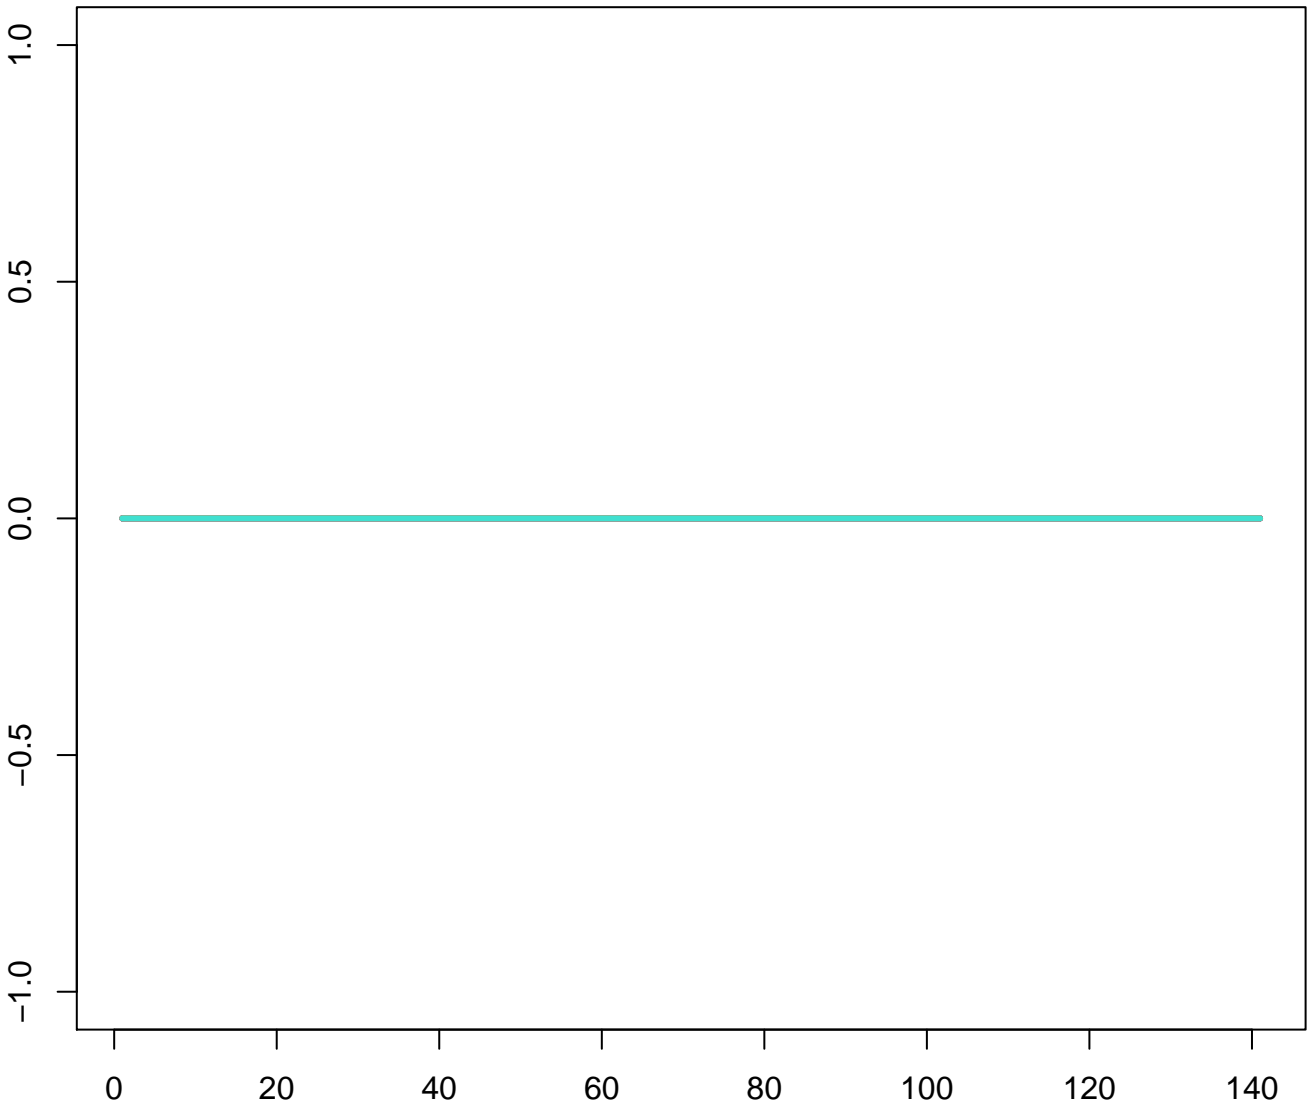

blood brain heart kidney lung ovary skin muscle testis

# 5\_36178243-36178324(+)\_mir-744\_high

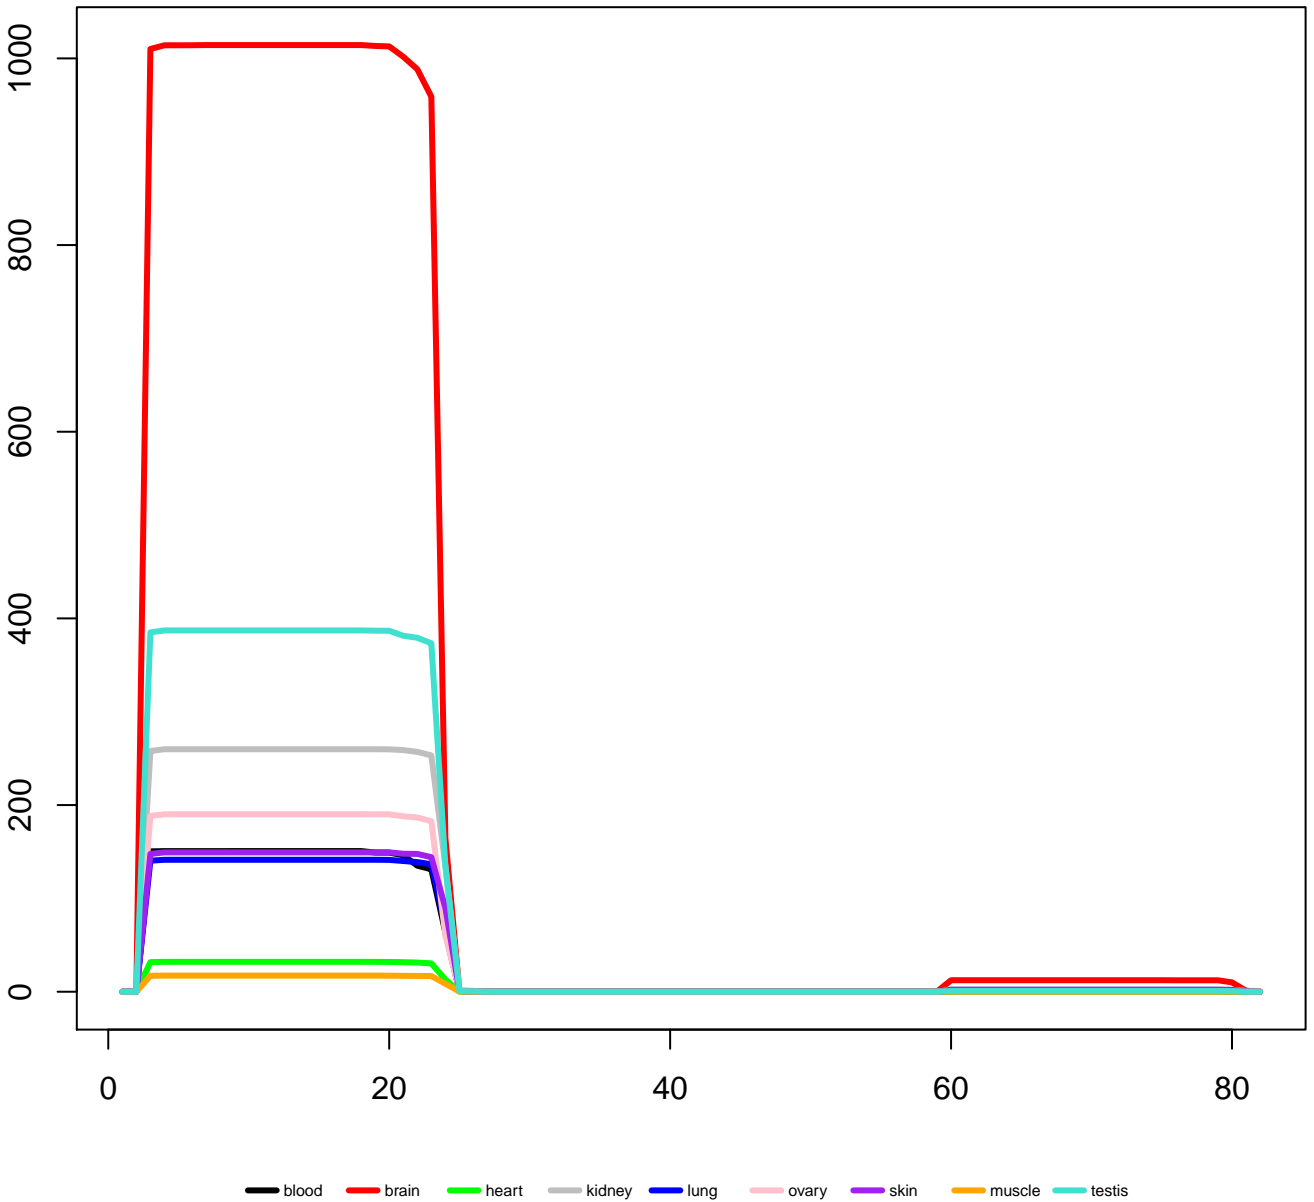

# 5\_41262556-41262660(-)\_cfa-mir-8872\_low

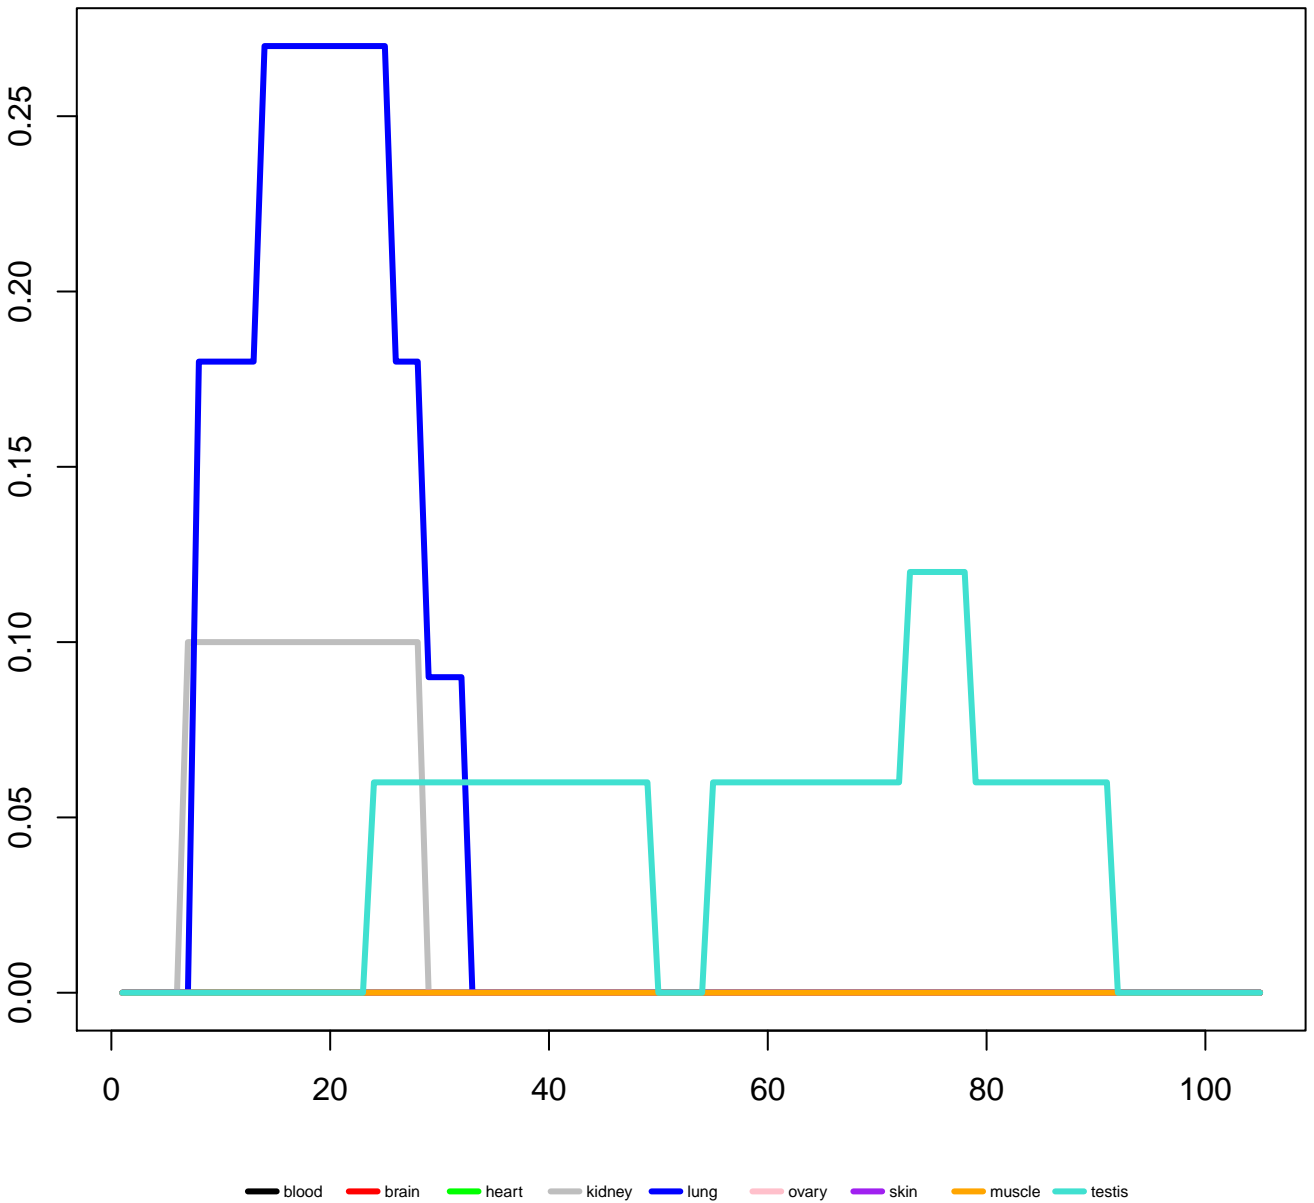



# 5\_41685165-41685258(+)\_cfa-mir-33b\_high

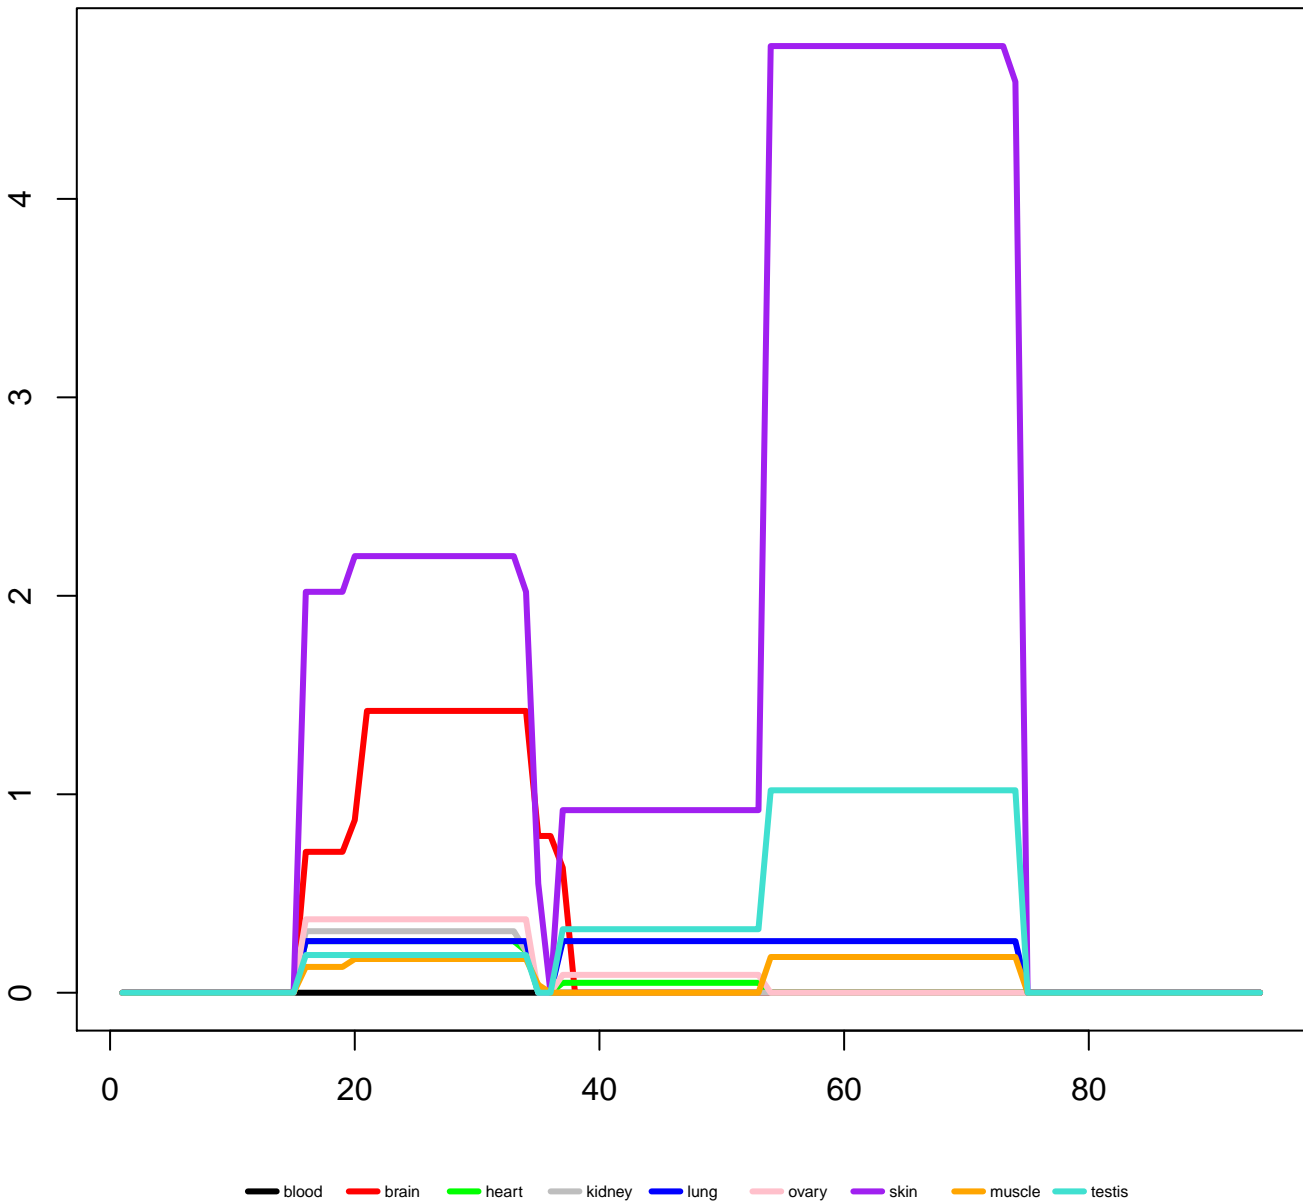

# 5\_42890895-42891009(-)\_cfa-mir-8869\_low

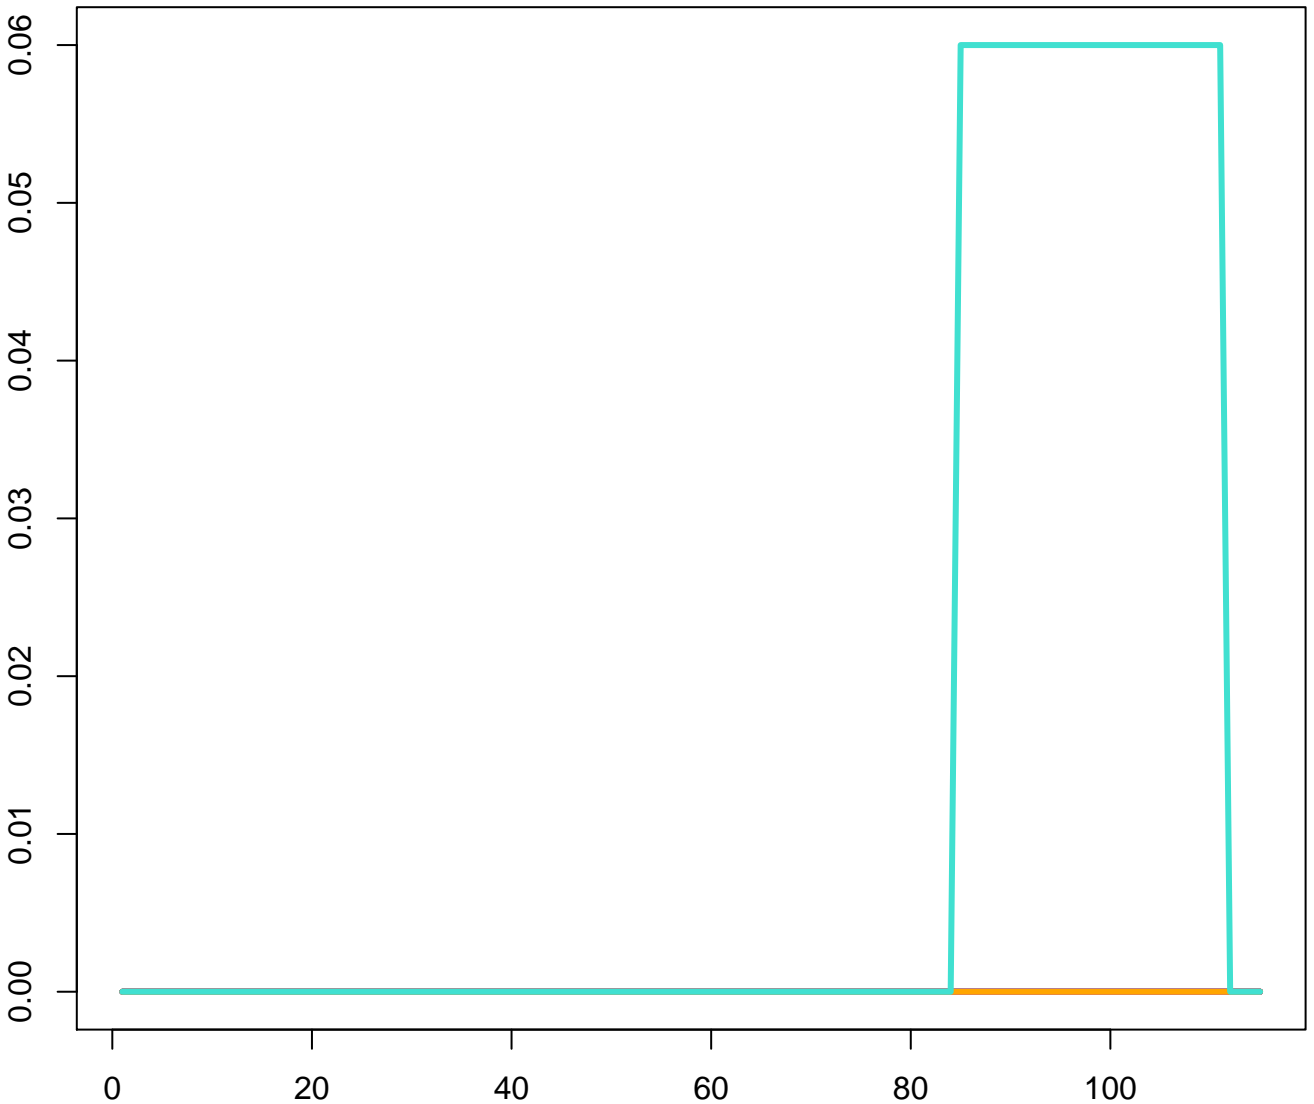

blood brain heart kidney lung ovary skin muscle testis

# 5\_45184774-45184828(+)\_cfa-mir-101-1\_high

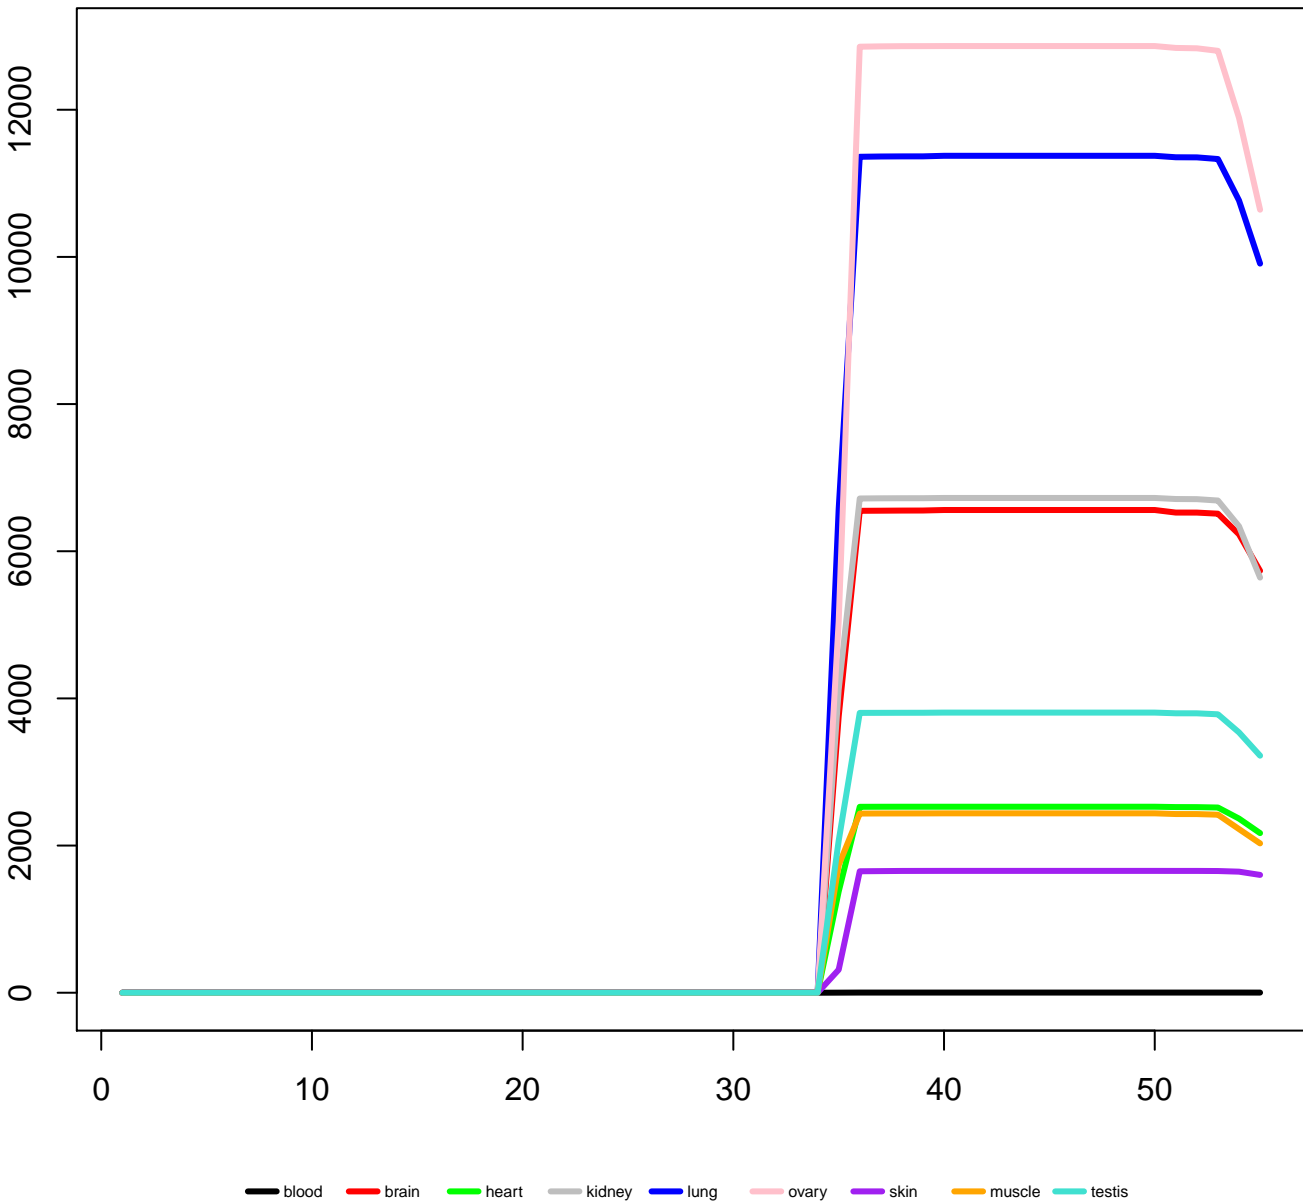

# 5\_56368400-56368479(+)\_cfa-mir-200b\_high

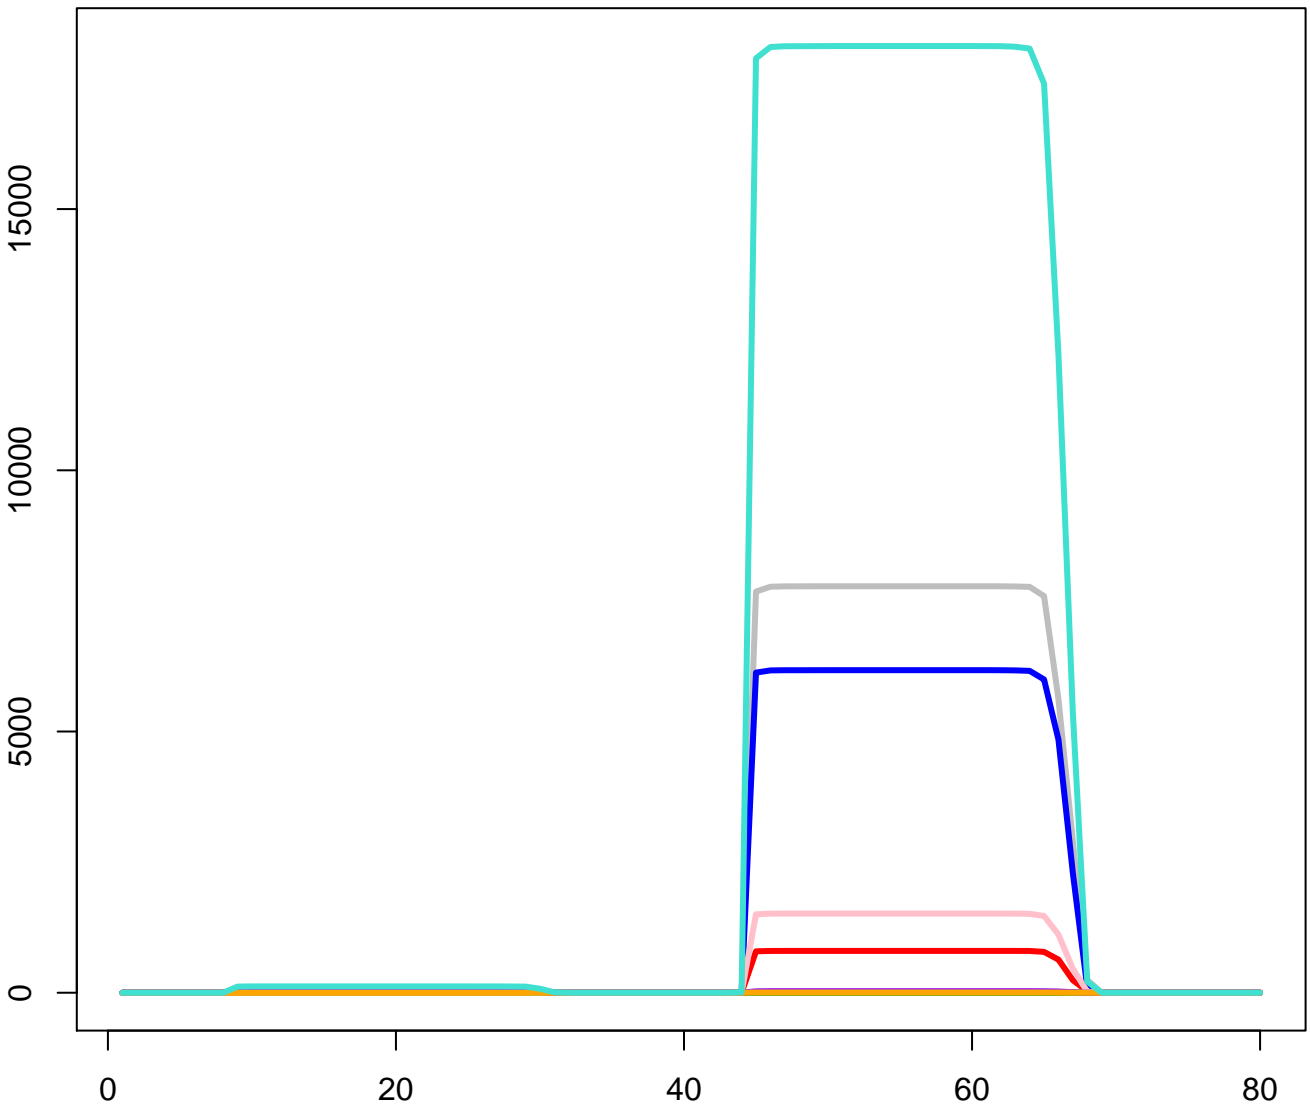

Legend: blood (black), brain (red), heart (green), kidney (grey), lung (blue), ovary (pink), skin (purple), muscle (orange), testis (cyan)

# 5\_56369063-56369152(+)\_cfa-mir-200a\_high

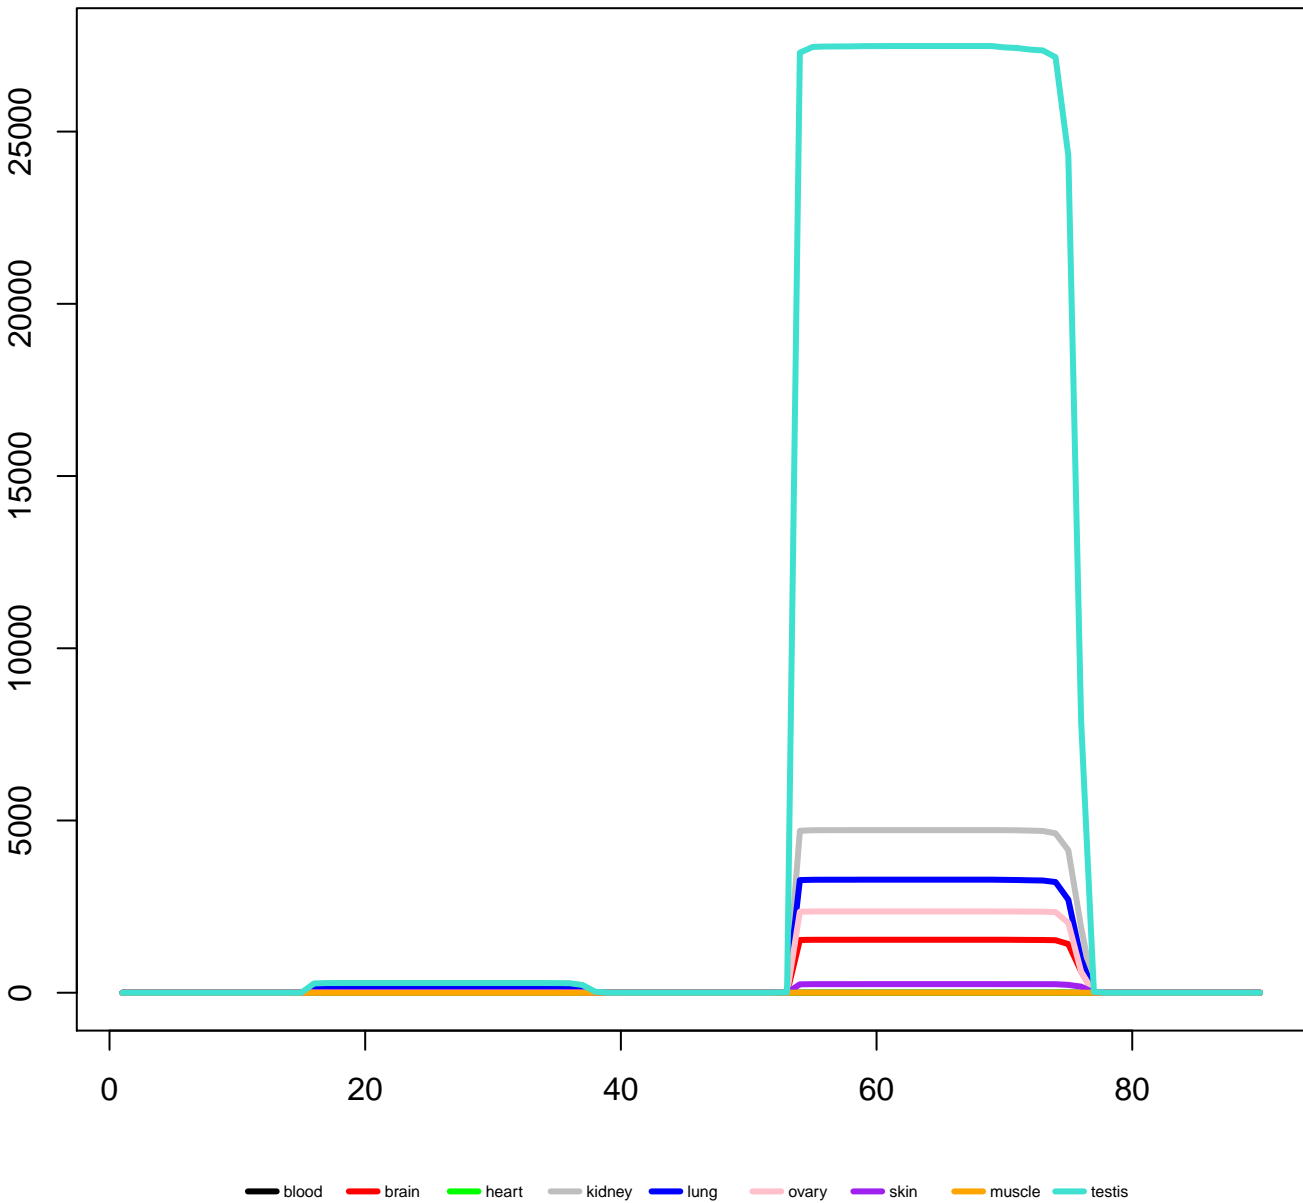



# 5\_56370509-56370593(+)\_cfa-mir-429\_high

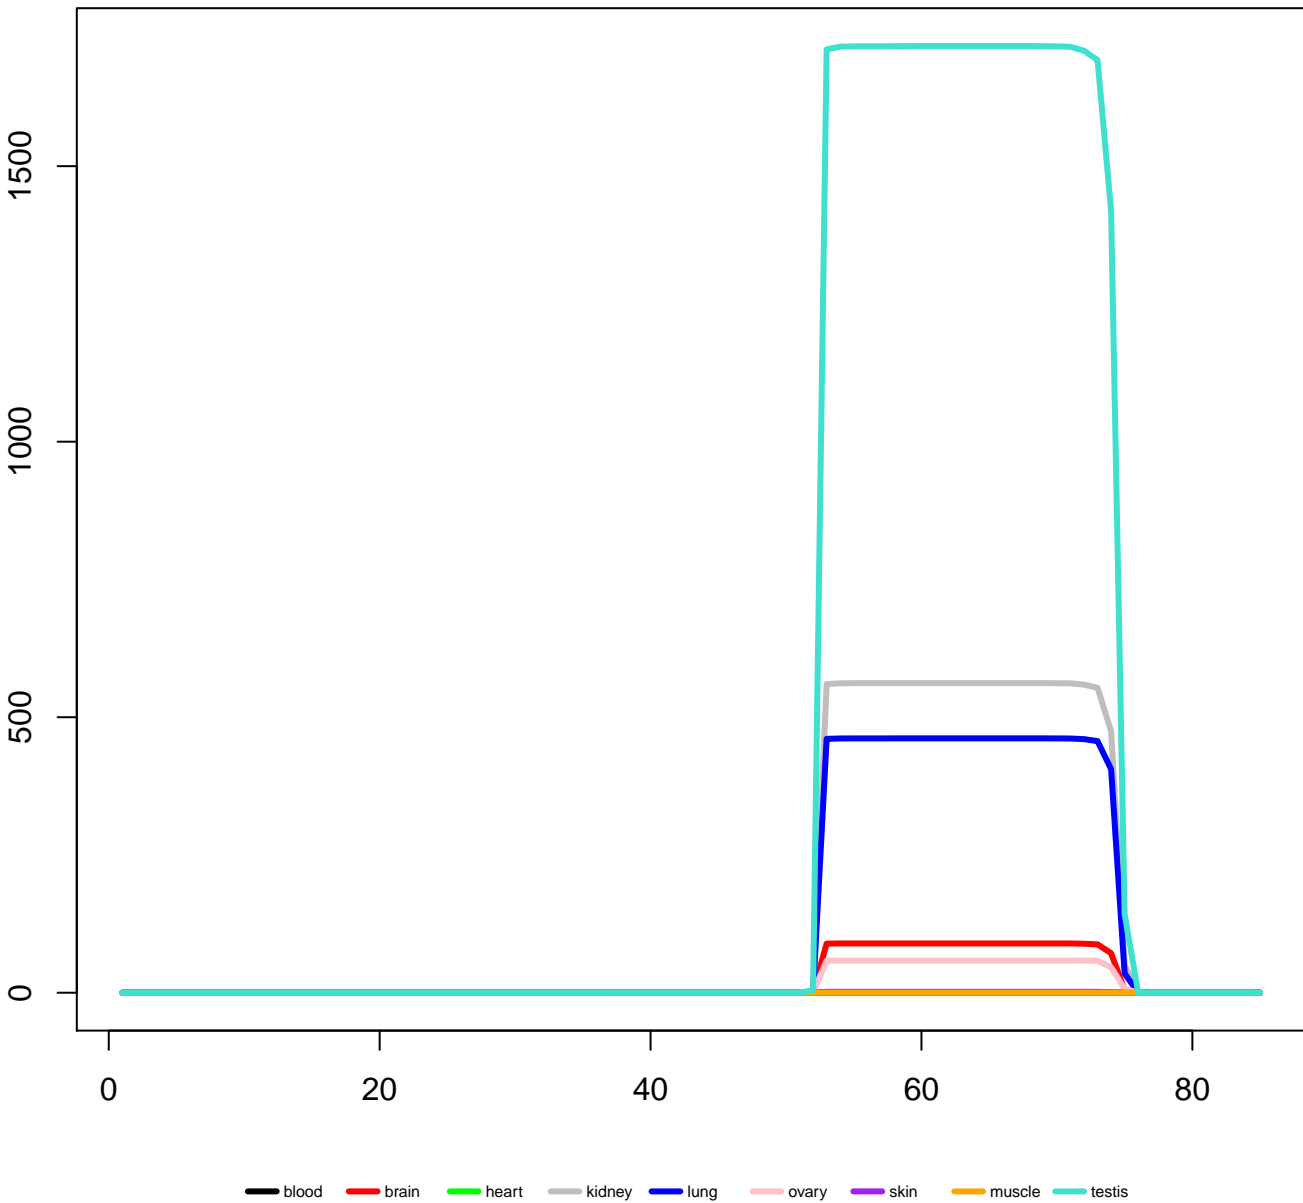

# 5\_57395454-57395588(+)\_cfa-mir-8866\_low

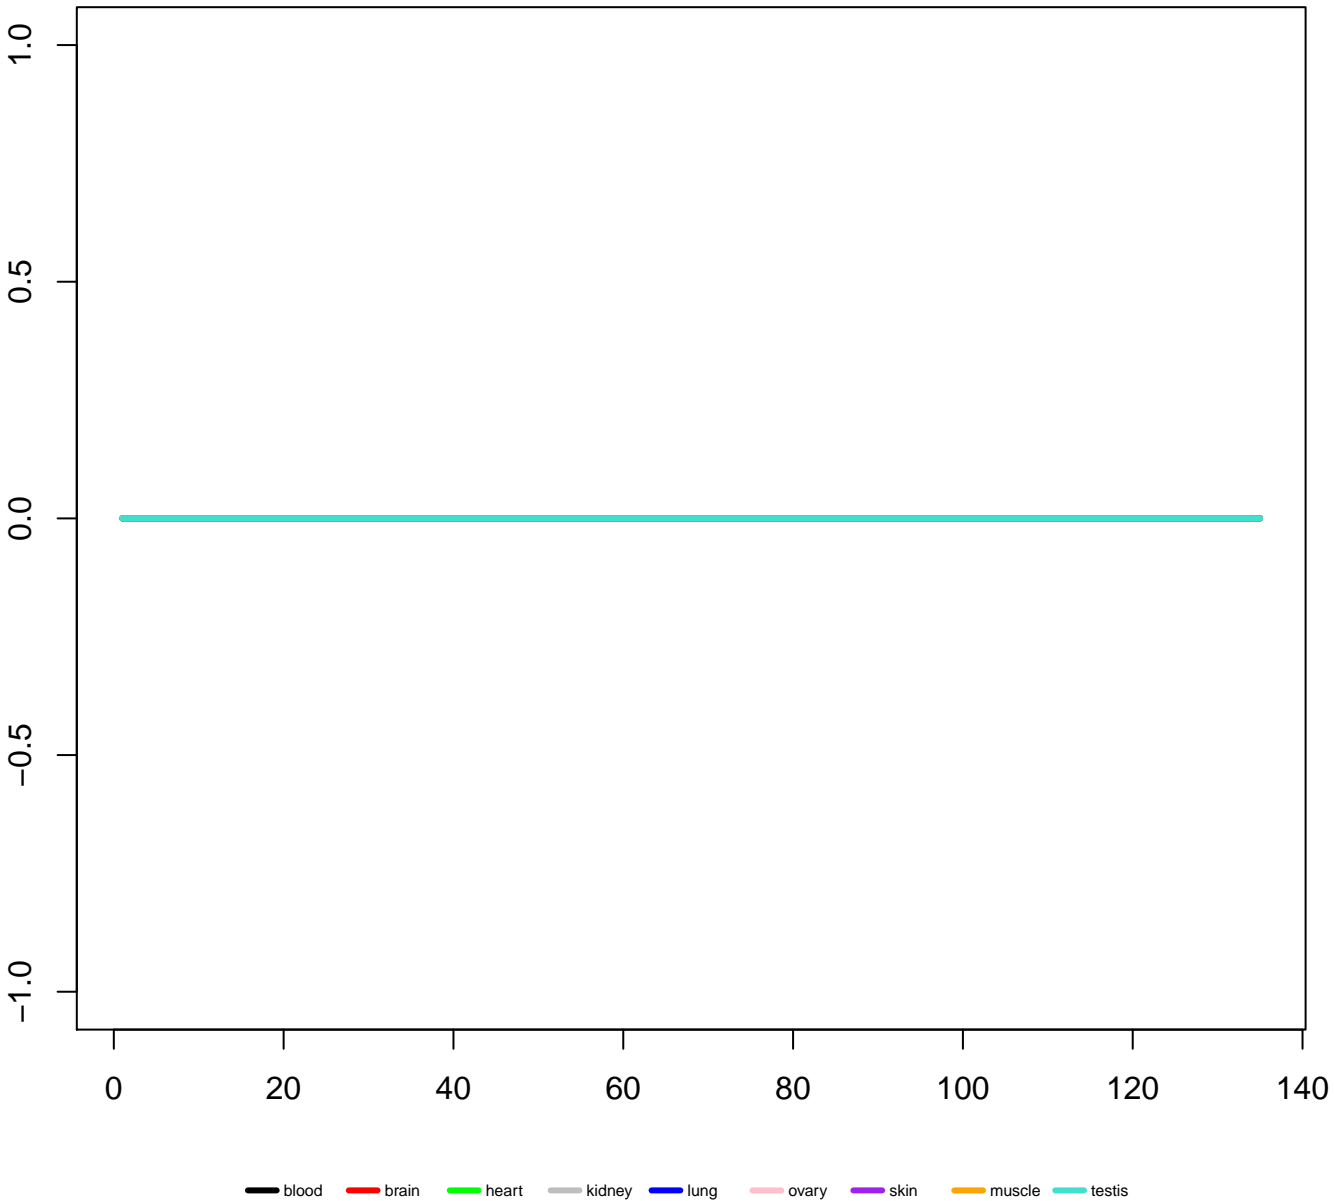



# 5\_58112708-58112801(-)\_cfa-mir-551a\_high

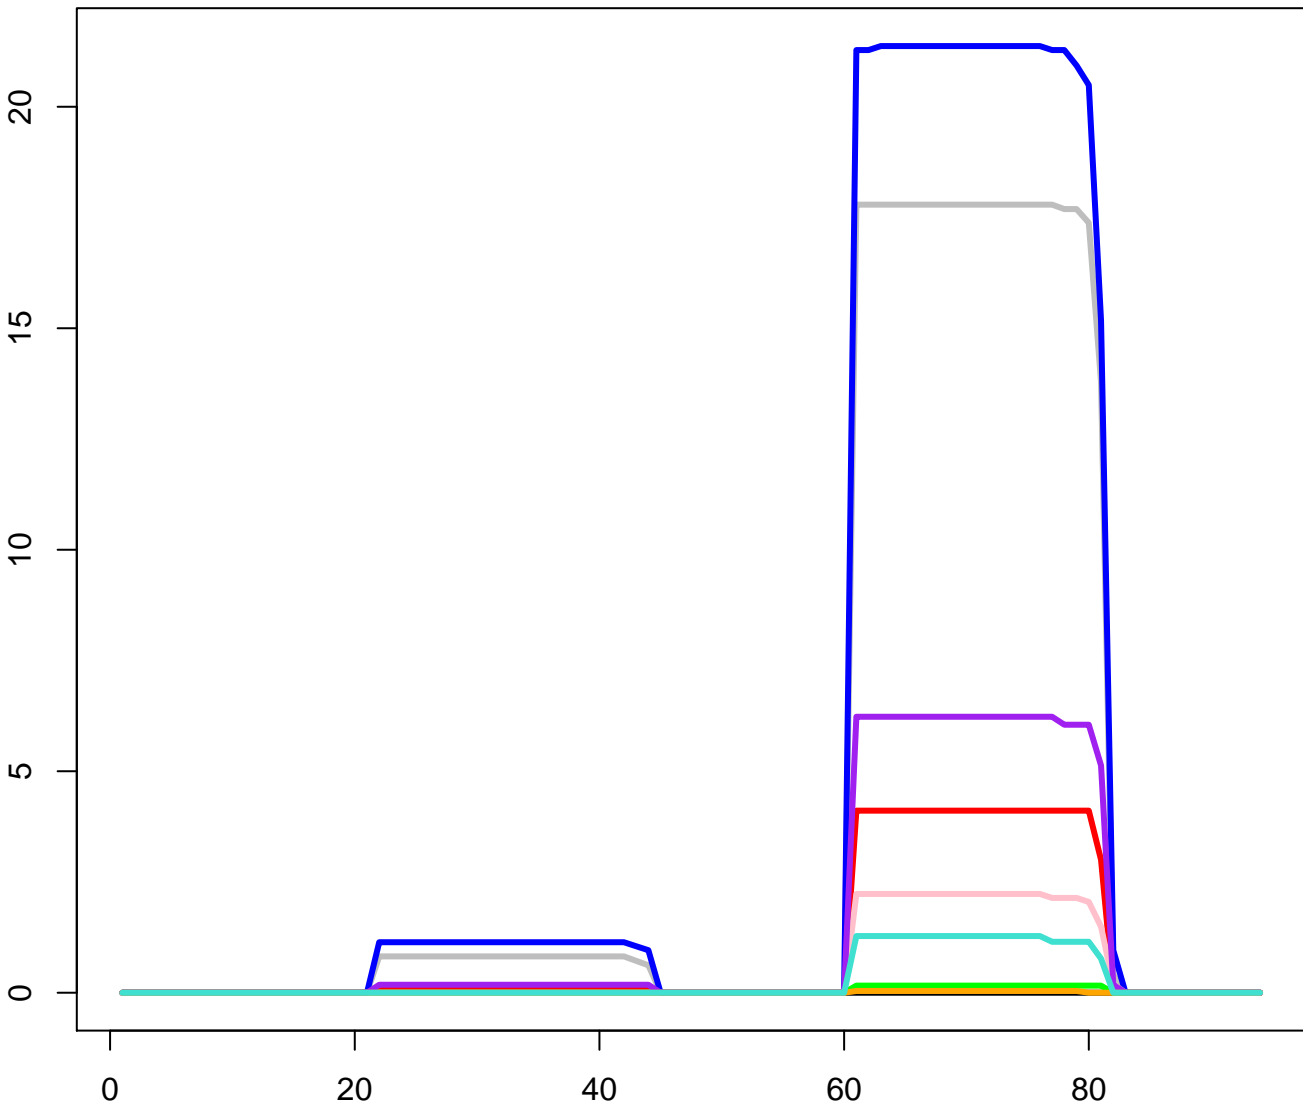

— blood — brain — heart — kidney — lung — ovary — skin — muscle — testis



# 5\_79814256-79814316(-)\_cfa-mir-140\_high

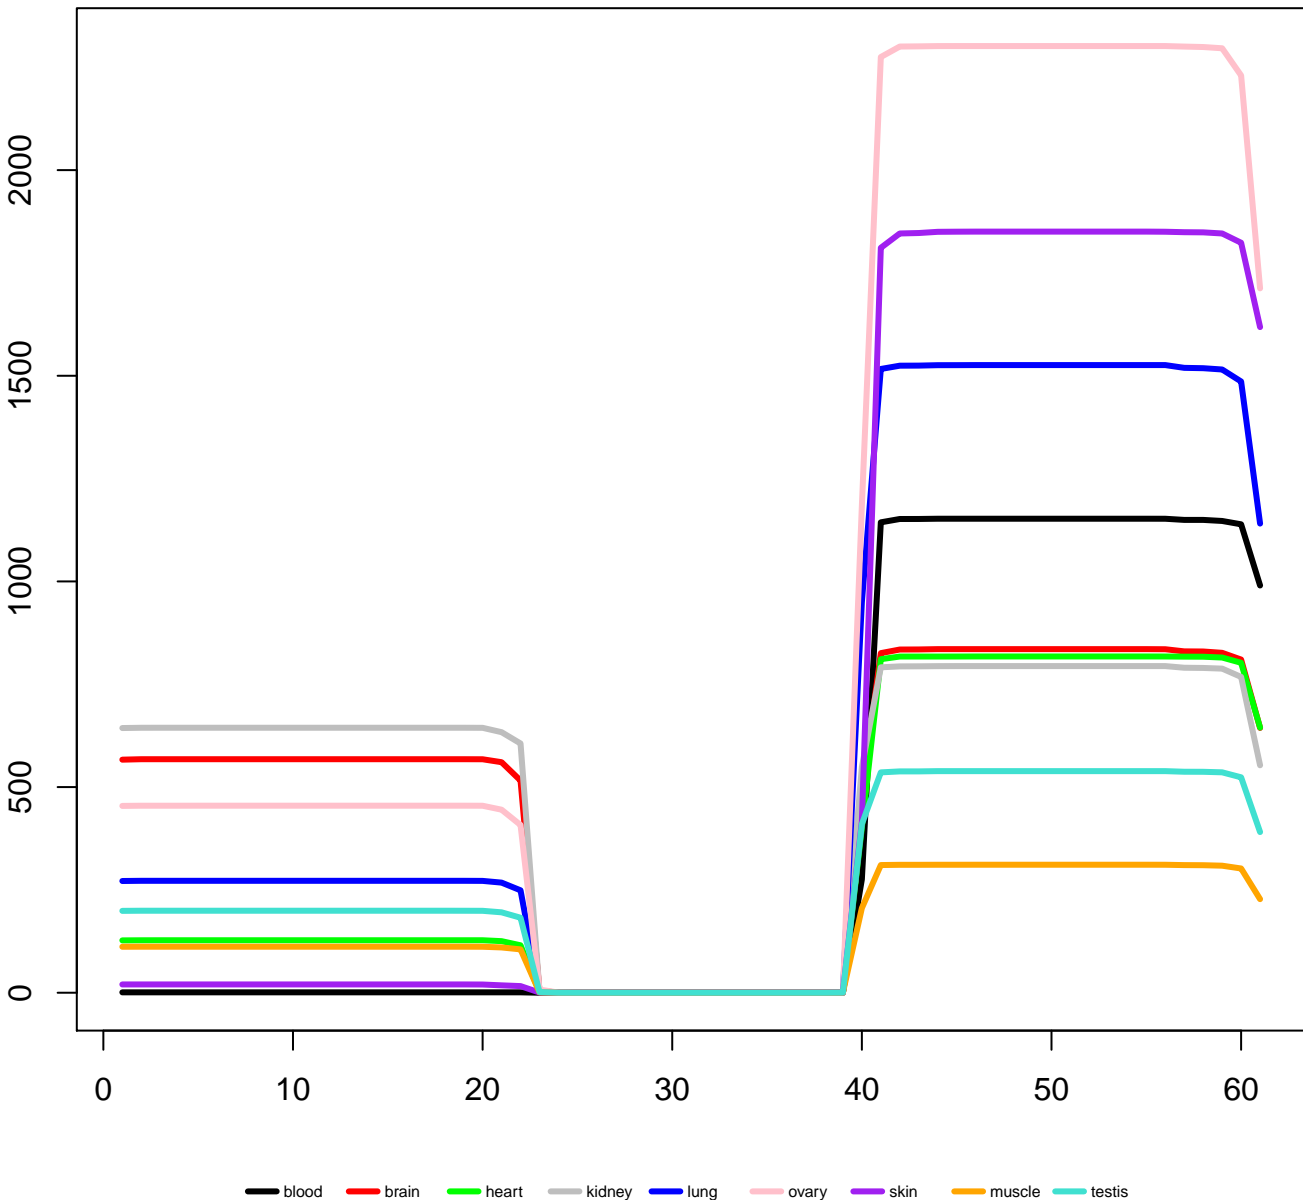

# 5\_82166208-82166270(+)\_cfa-mir-328\_high

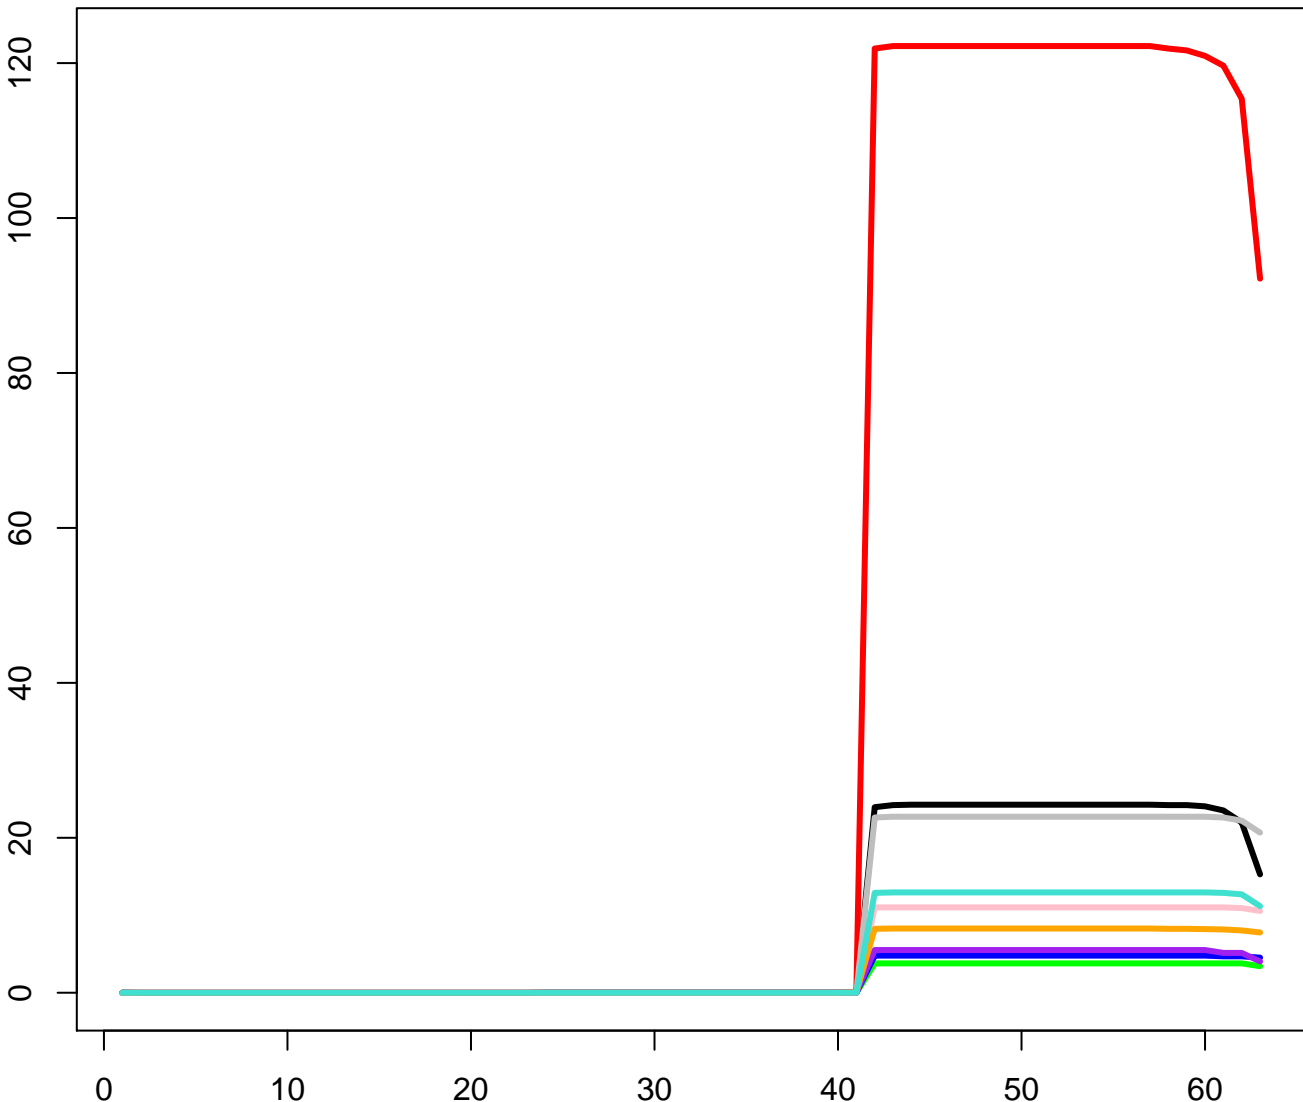

— blood — brain — heart — kidney — lung — ovary — skin — muscle — testis

# 6\_5910293-5910435(-)\_cfa-mir-2387\_high

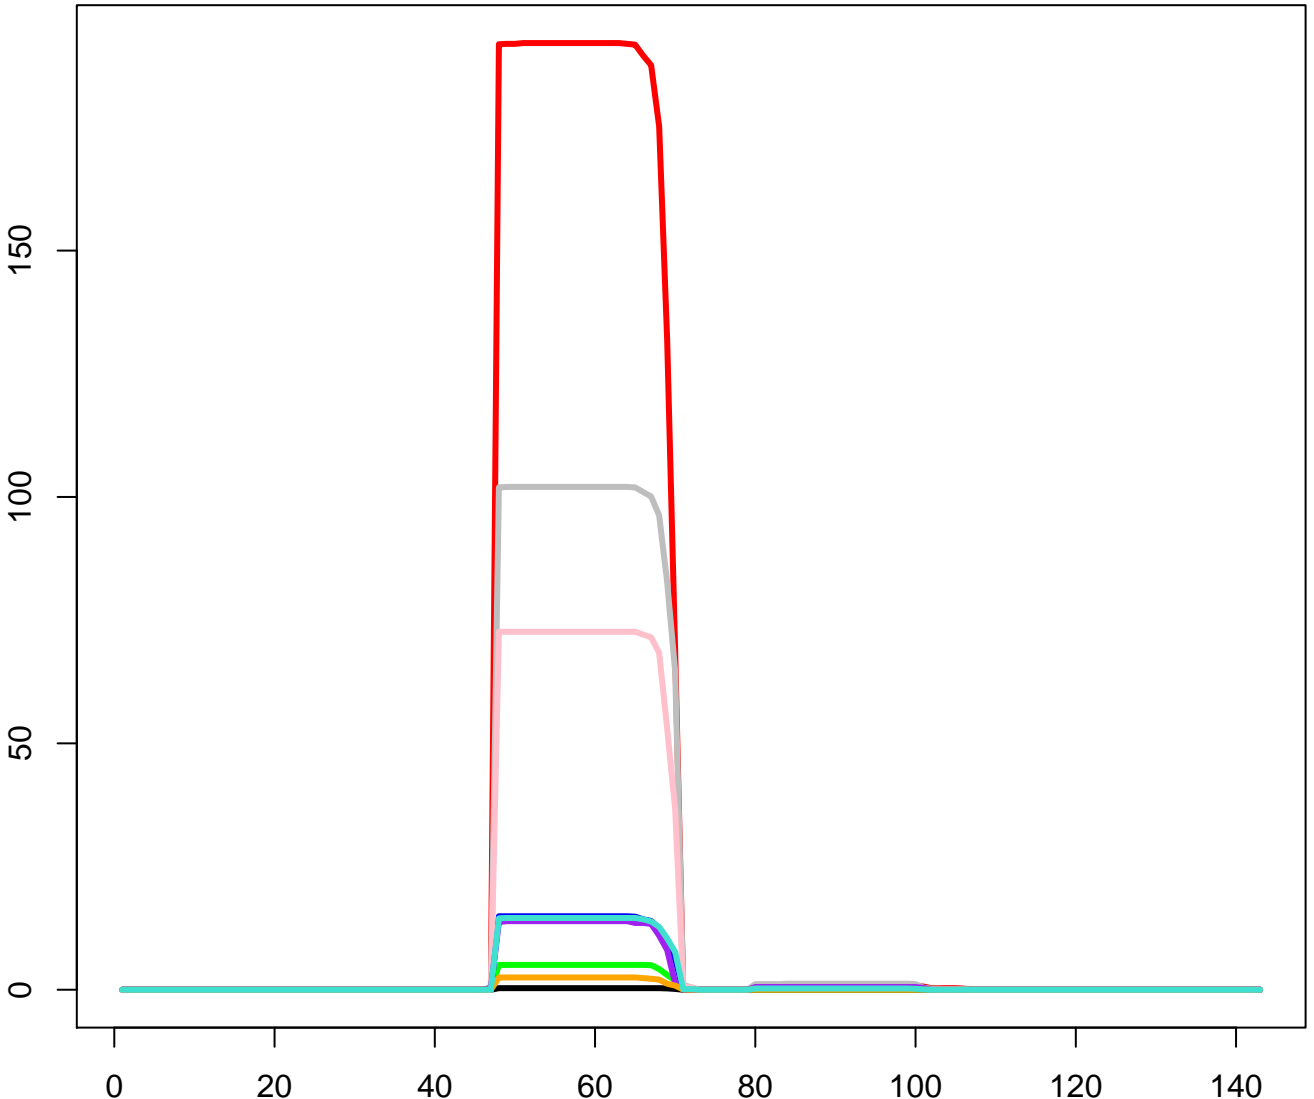

— blood — brain — heart — kidney — lung — ovary — skin — muscle — testis

# 6\_6186538-6186598(-)\_cfa-mir-590\_high

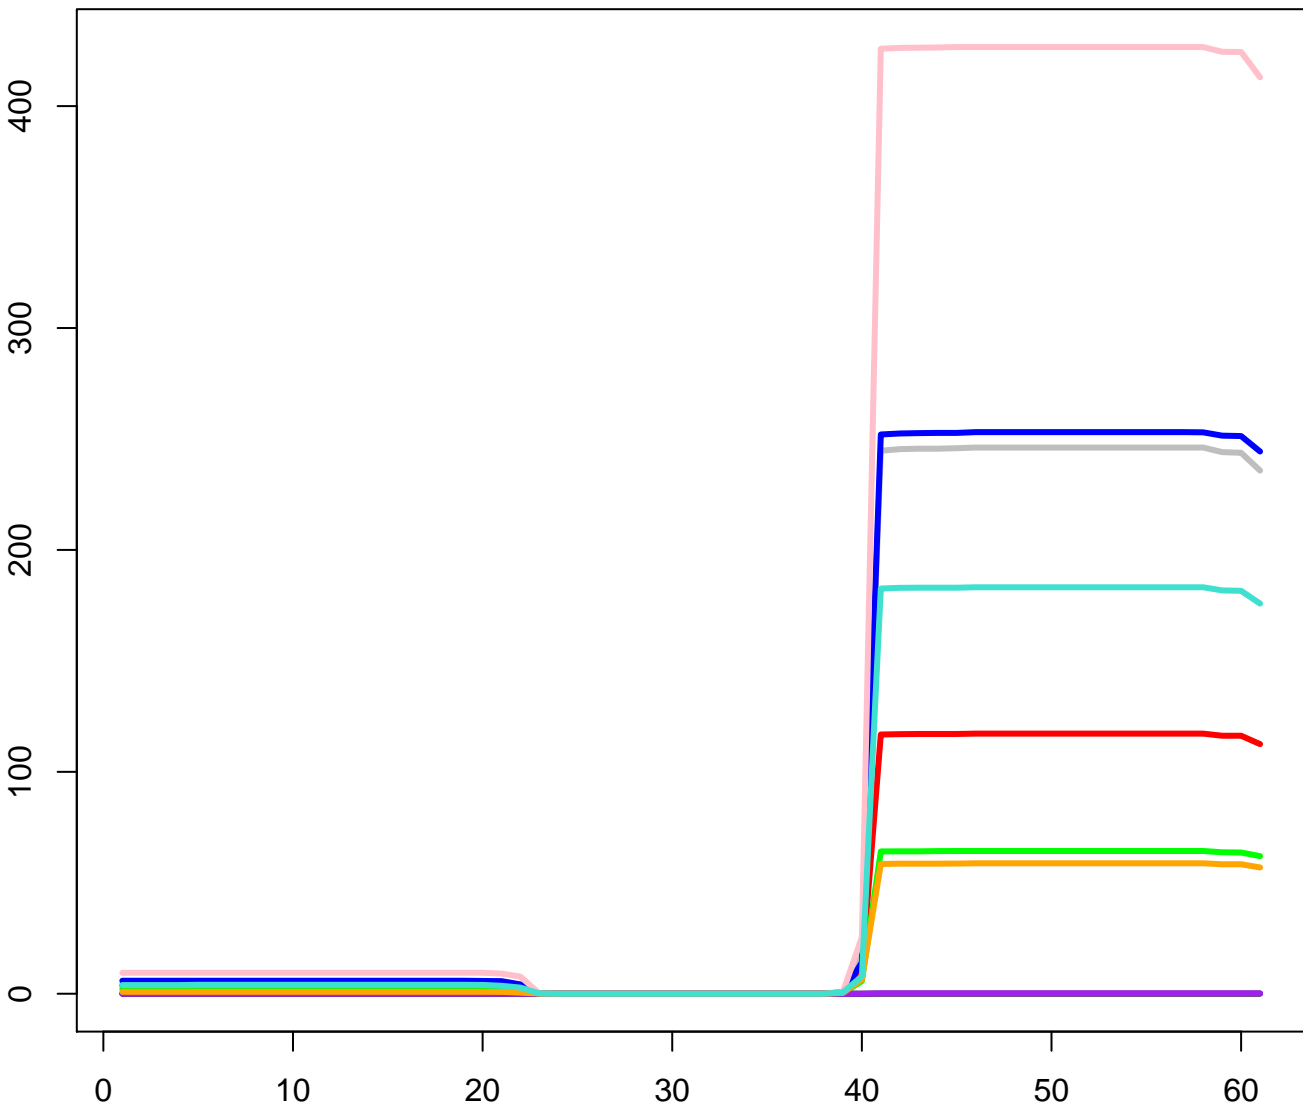

— blood — brain — heart — kidney — lung — ovary — skin — muscle — testis



# 6\_9498780-9498840(+)\_cfa-mir-93\_high

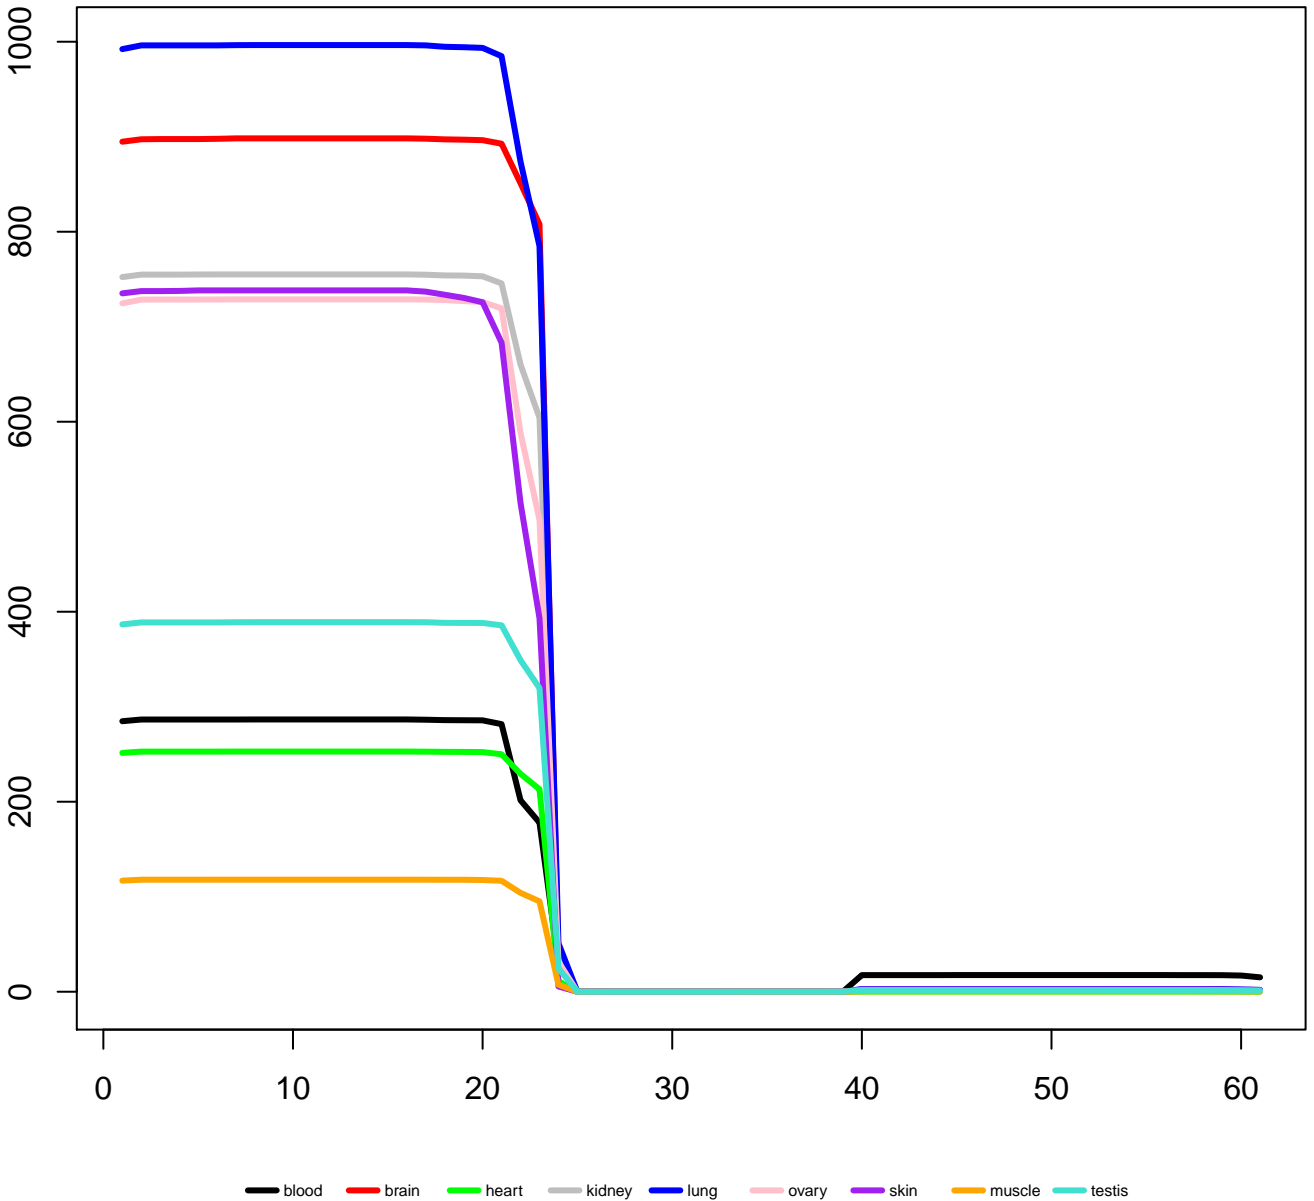



# 6\_9498993-9499051(+)\_cfa-mir-25\_high

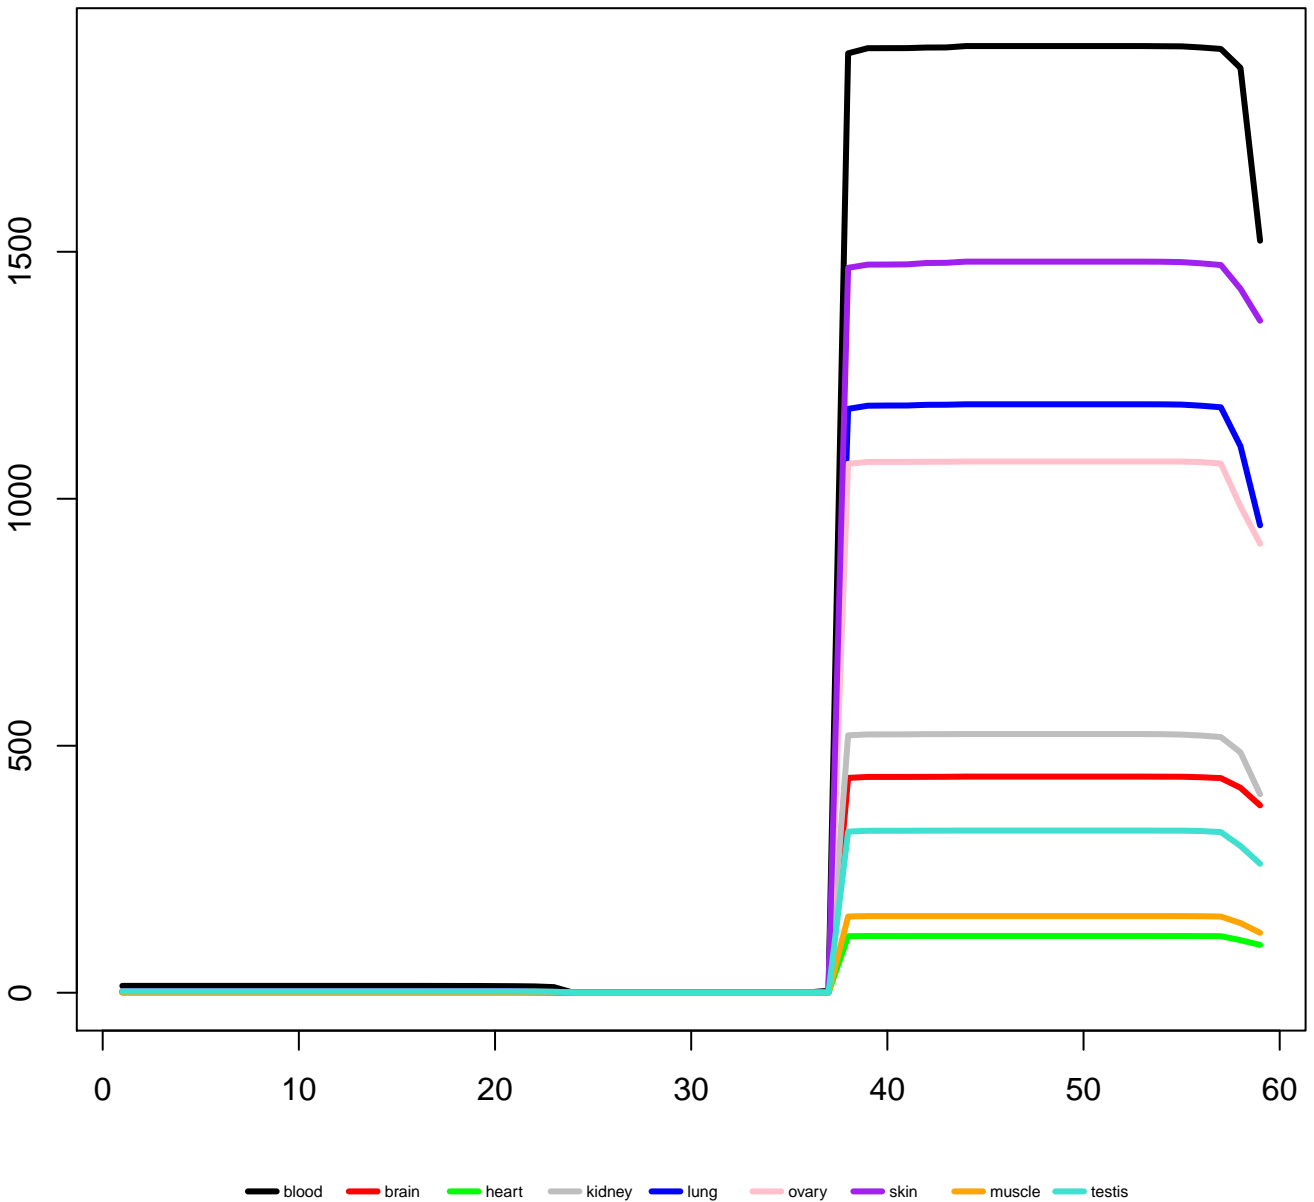

# 6\_12423353-12423433(+)\_mir-3533\_low



# 6\_12453870-12453941(+)\_cfa-mir-589\_low

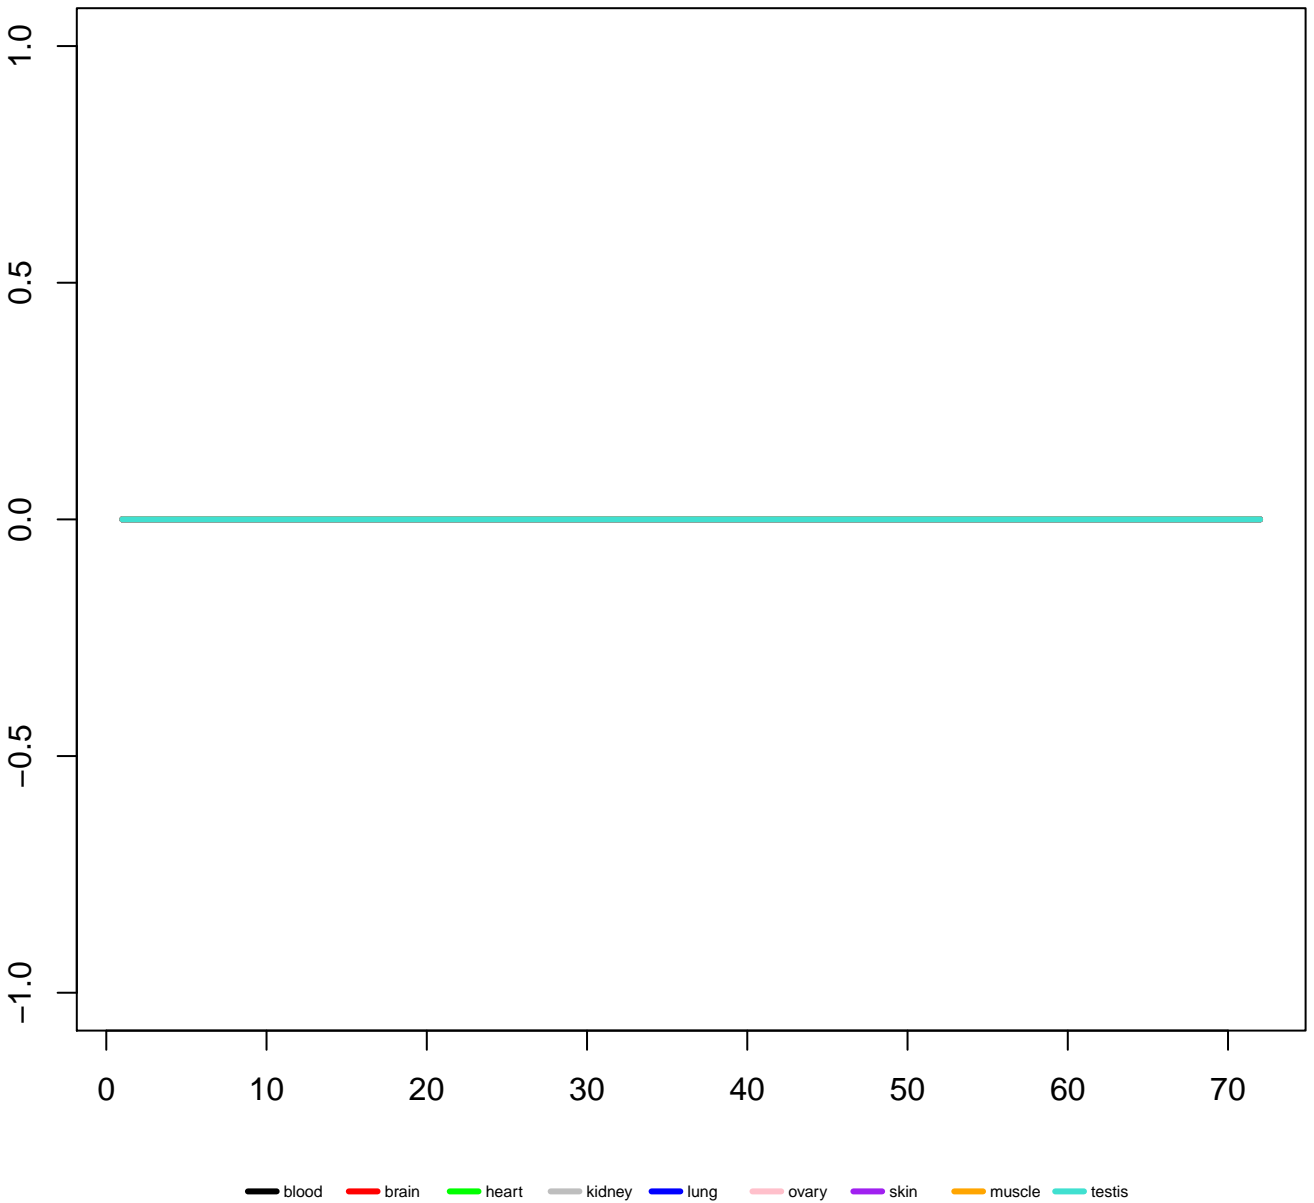

# 6\_13982905-13983035(-)\_cfa-mir-8873a\_low



blood brain heart kidney lung ovary skin muscle testis



# 6\_15817410-15817550(+)\_cfa-mir-8879\_low

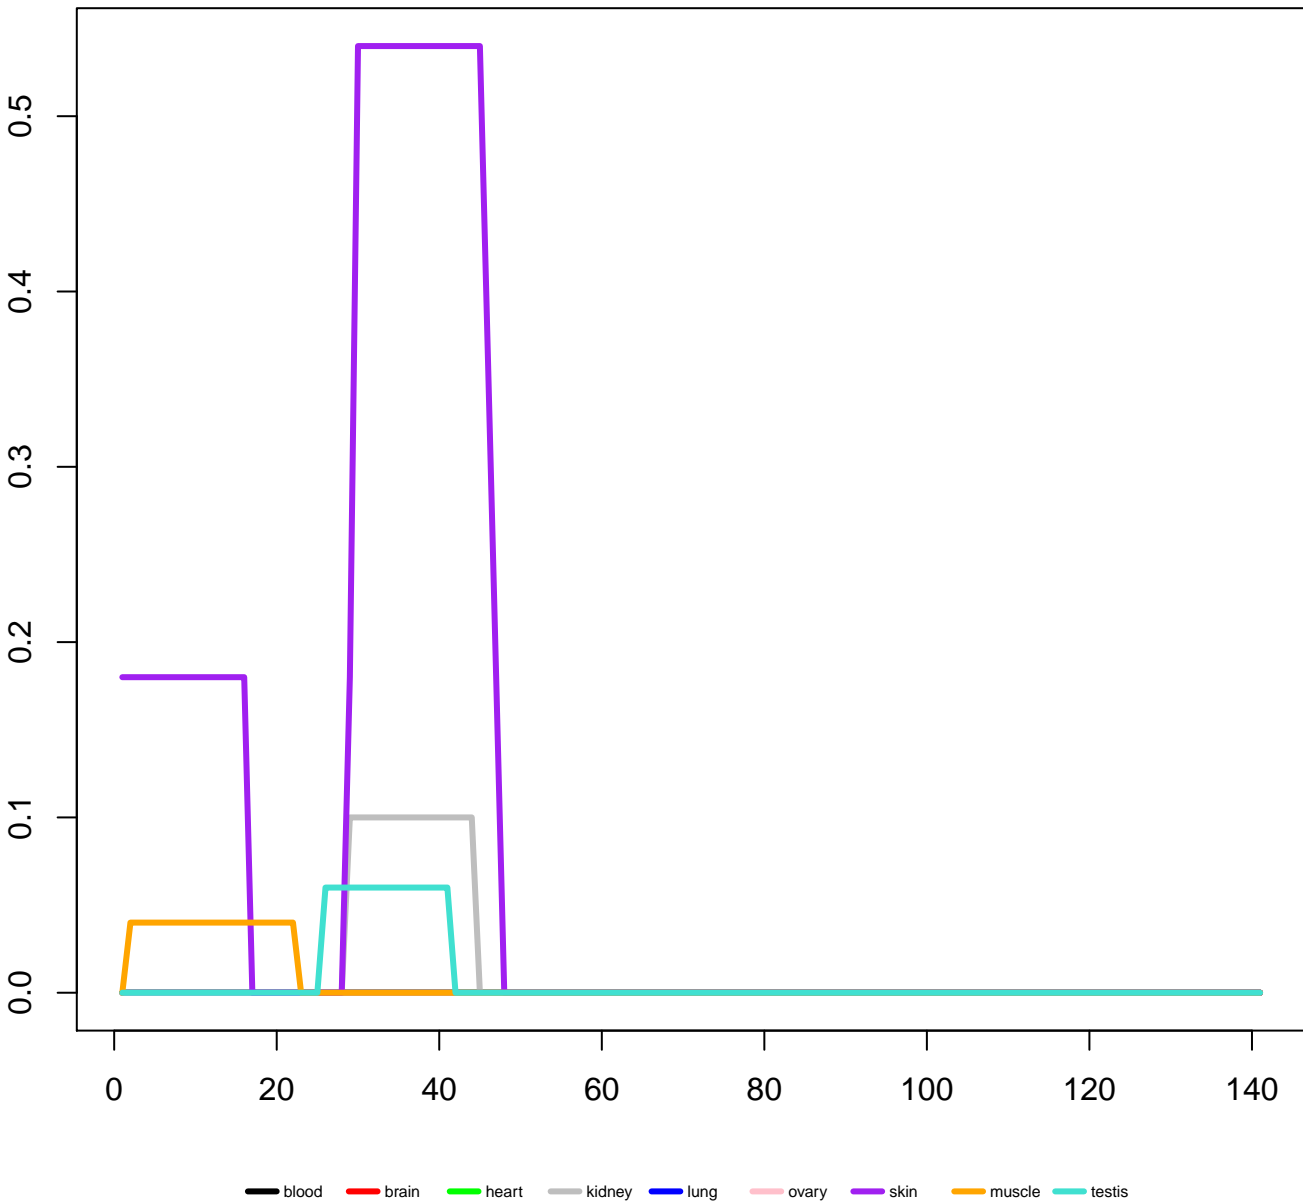

# 6\_15853520-15853577(+)\_cfa-mir-339-1\_high

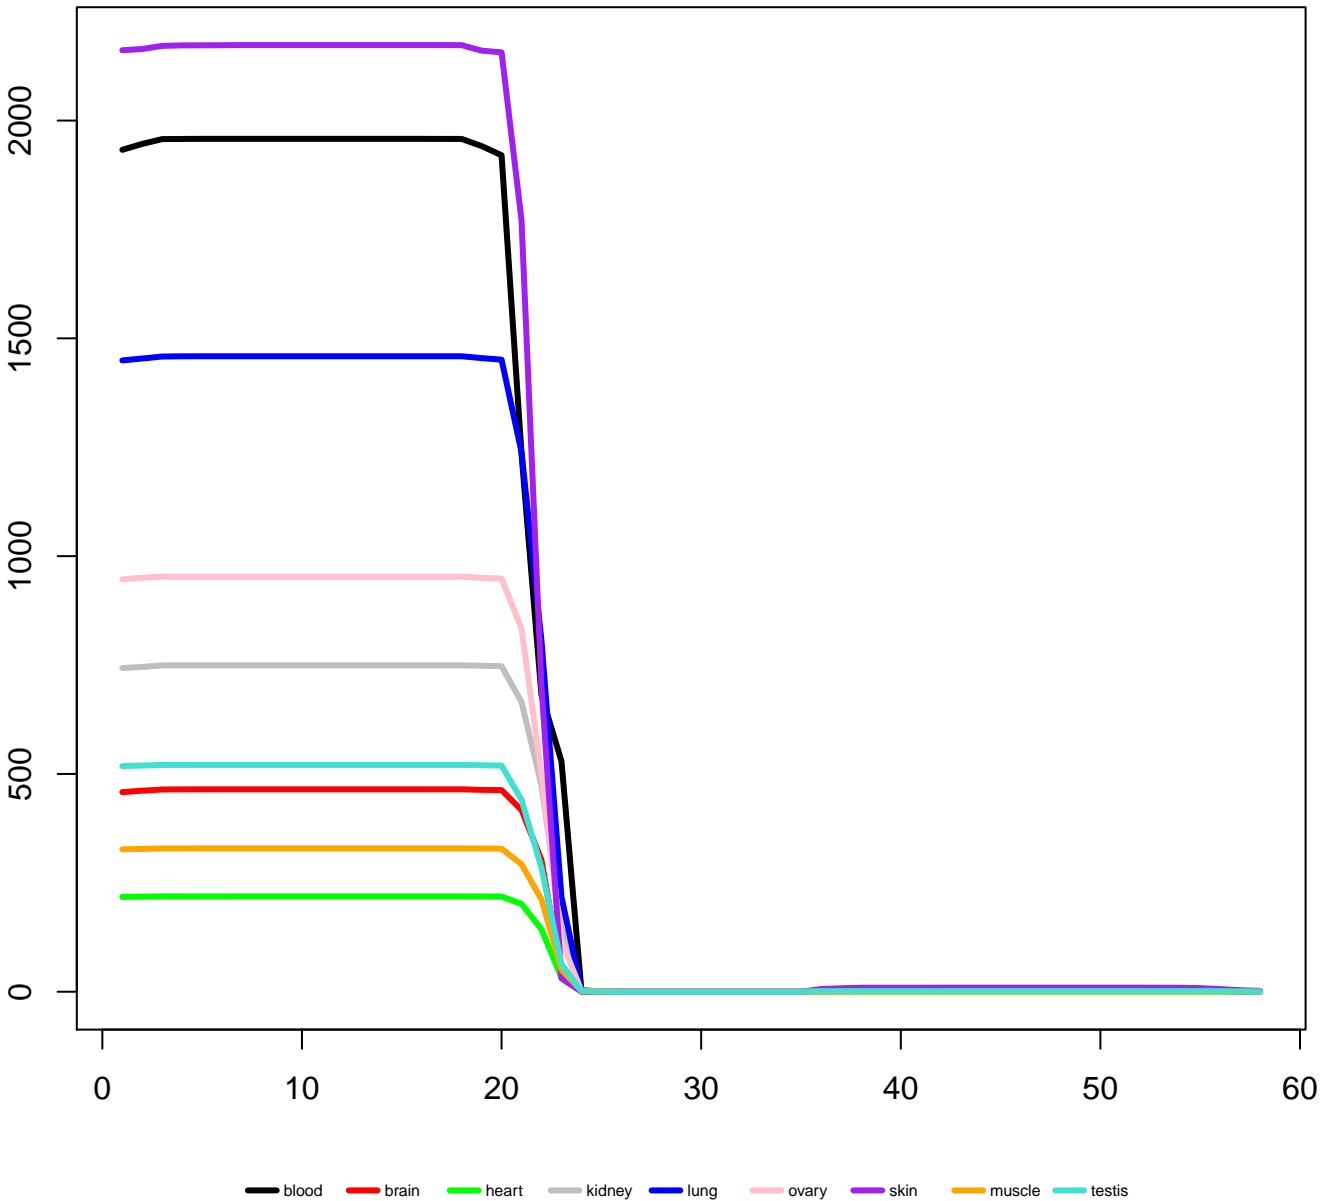

# 6\_17305798-17305868(-)\_mir-762\_low

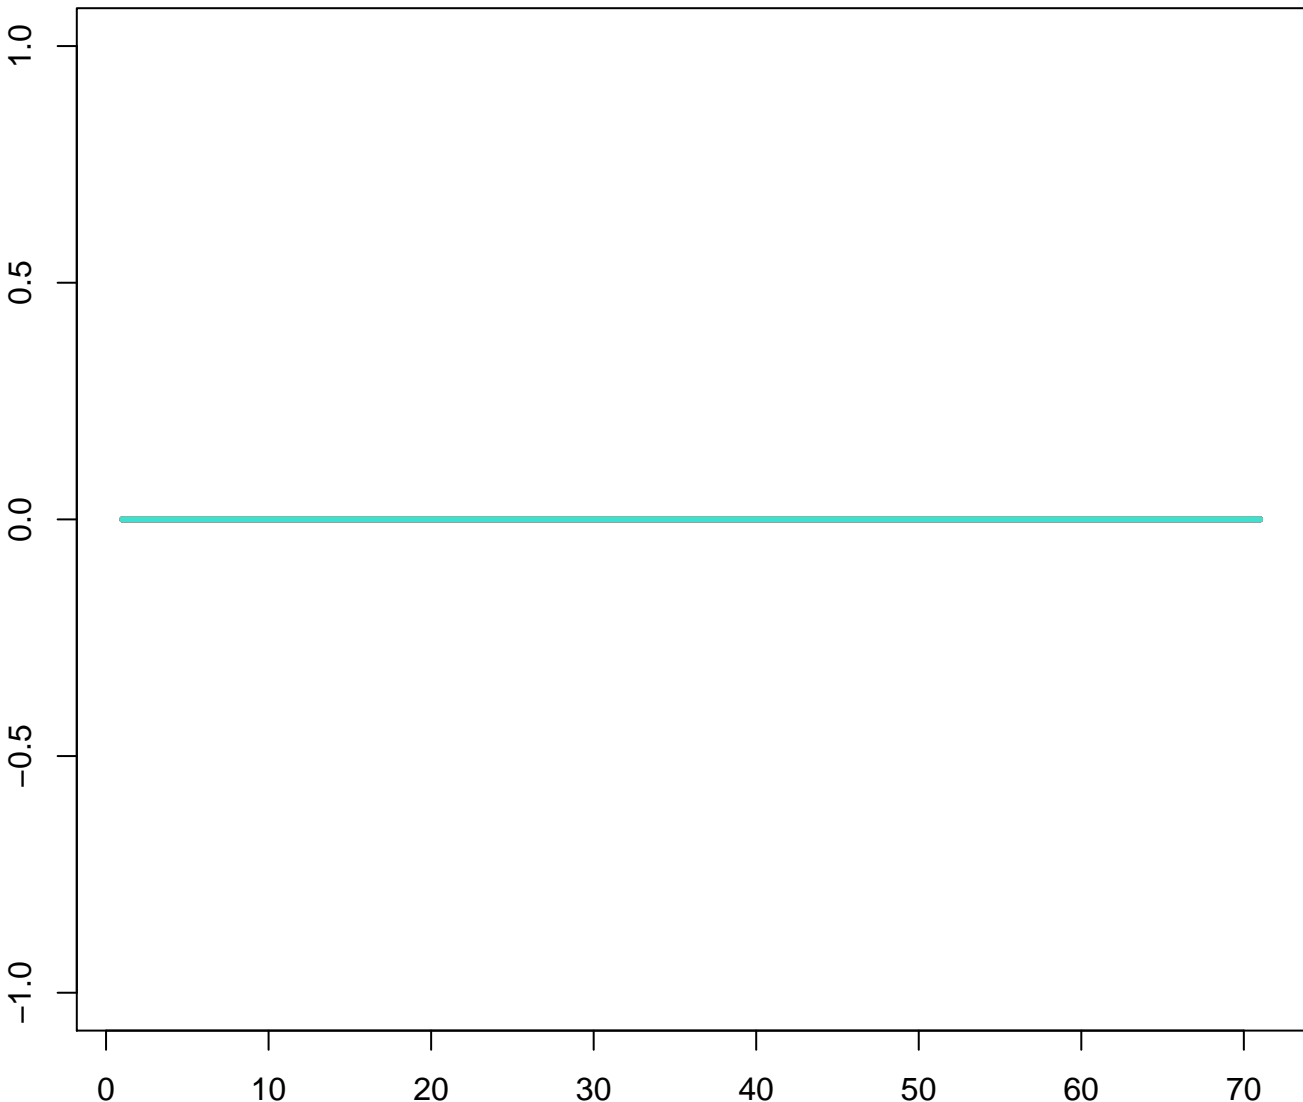

— blood — brain — heart — kidney — lung — ovary — skin — muscle — testis



# 6\_18455993-18456062(+)\_mir-9130\_low

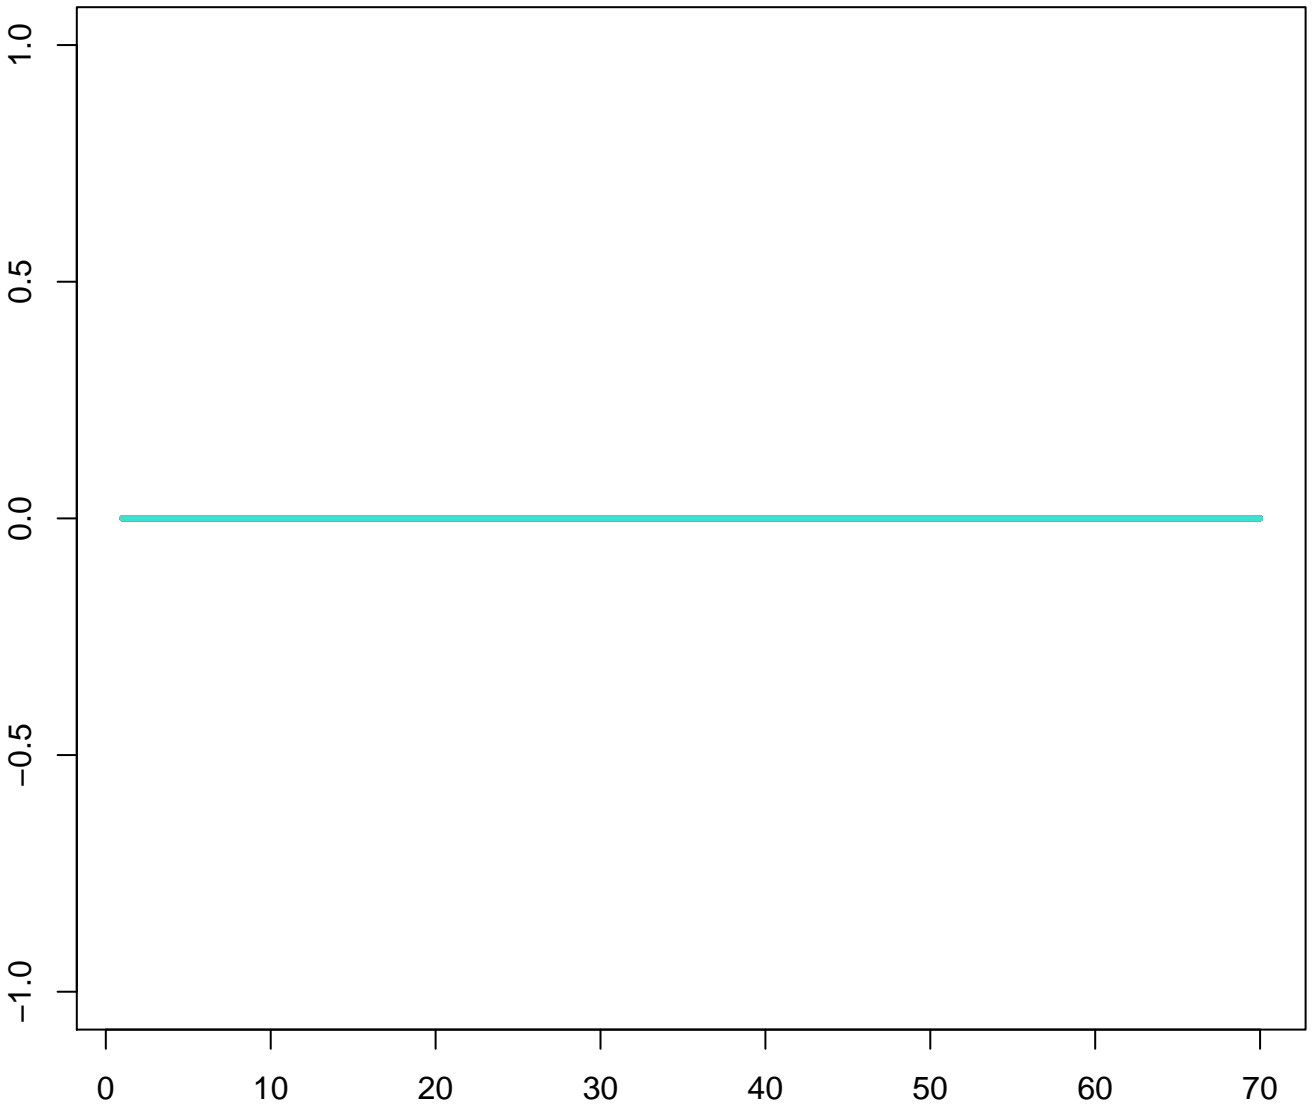

blood brain heart kidney lung ovary skin muscle testis

# 6\_21081056-21081200(-)\_cfa-mir-8875\_low

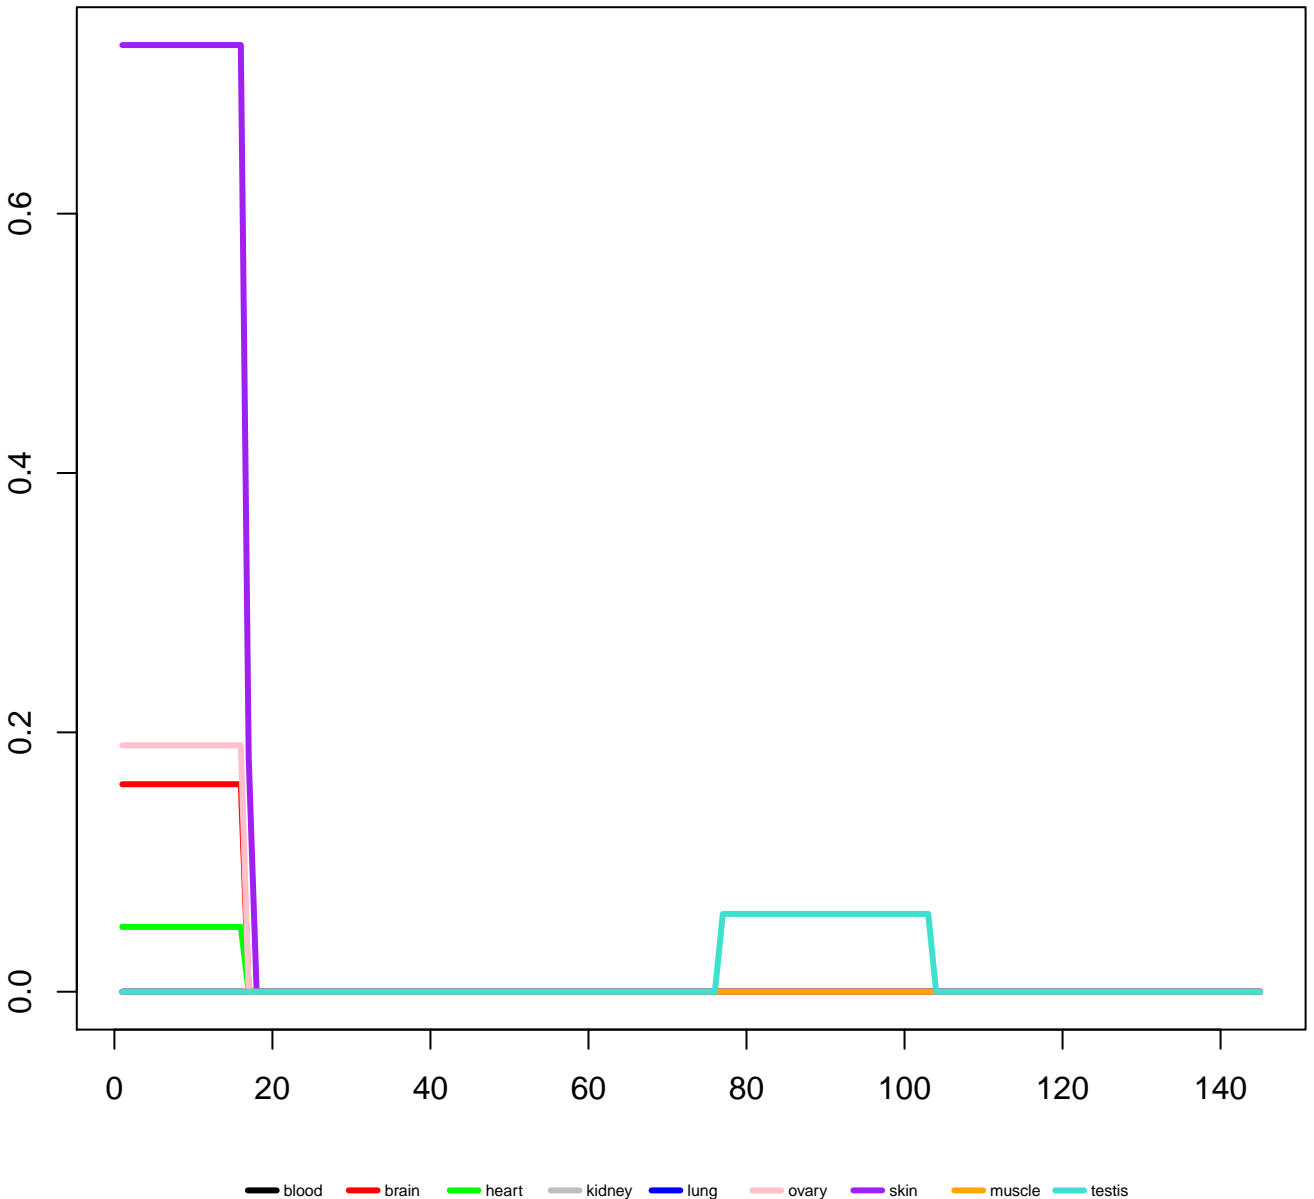

# 6\_21119782-21119896(+)\_cfa-mir-8878\_low

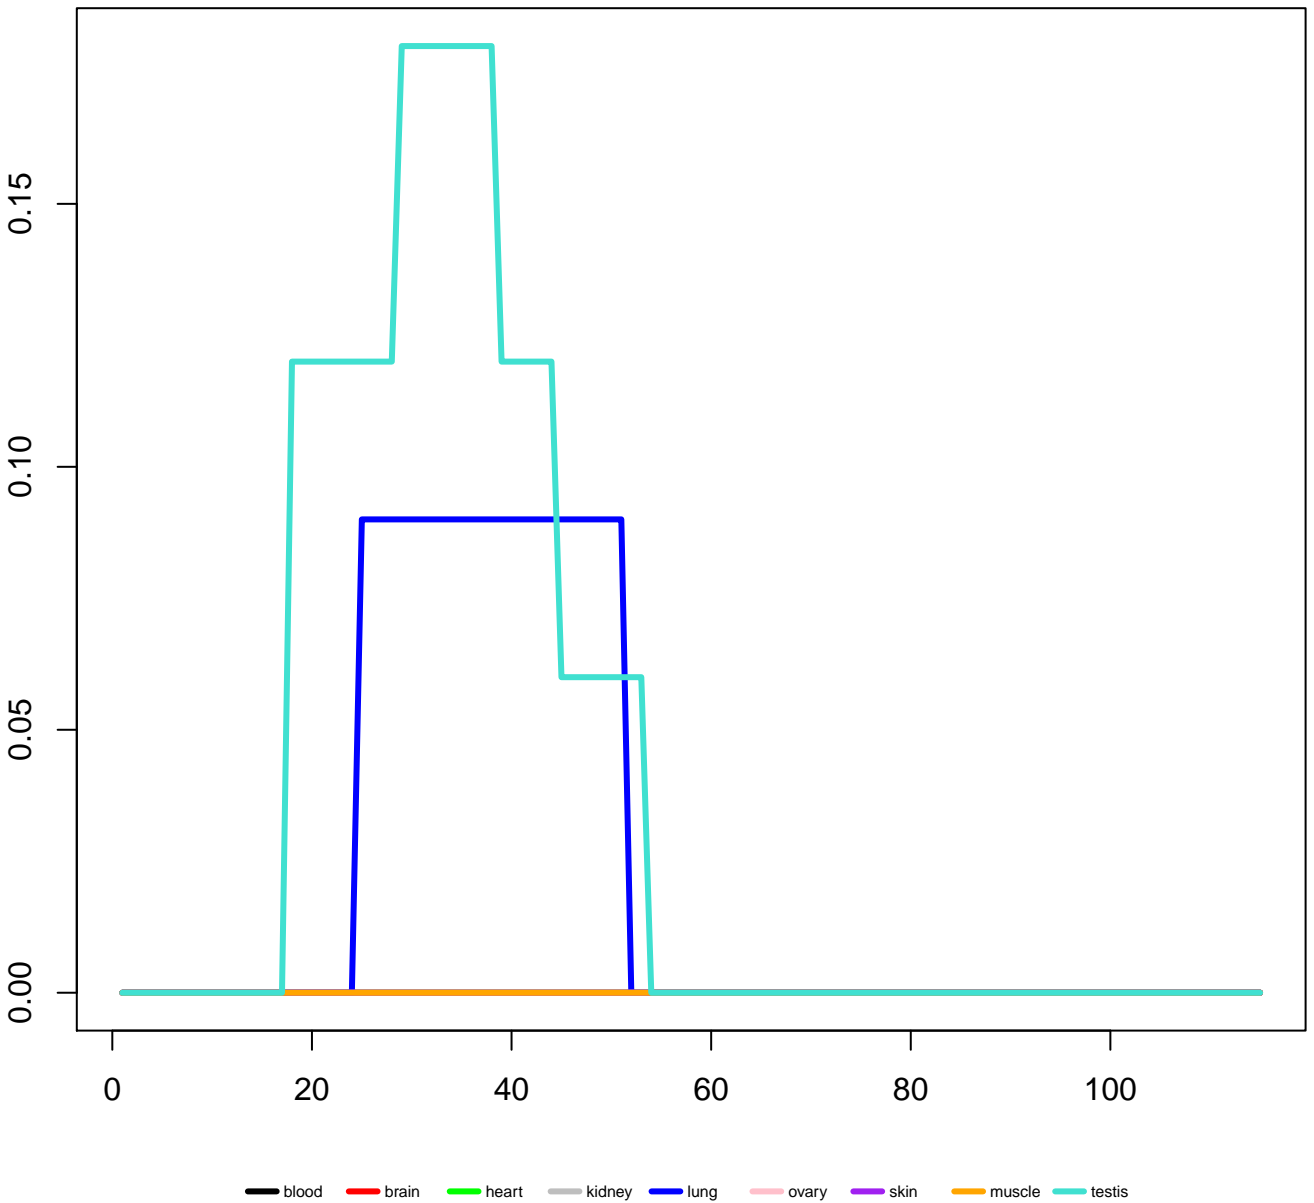

# 6\_28190589-28190677(-)\_mir-484\_high

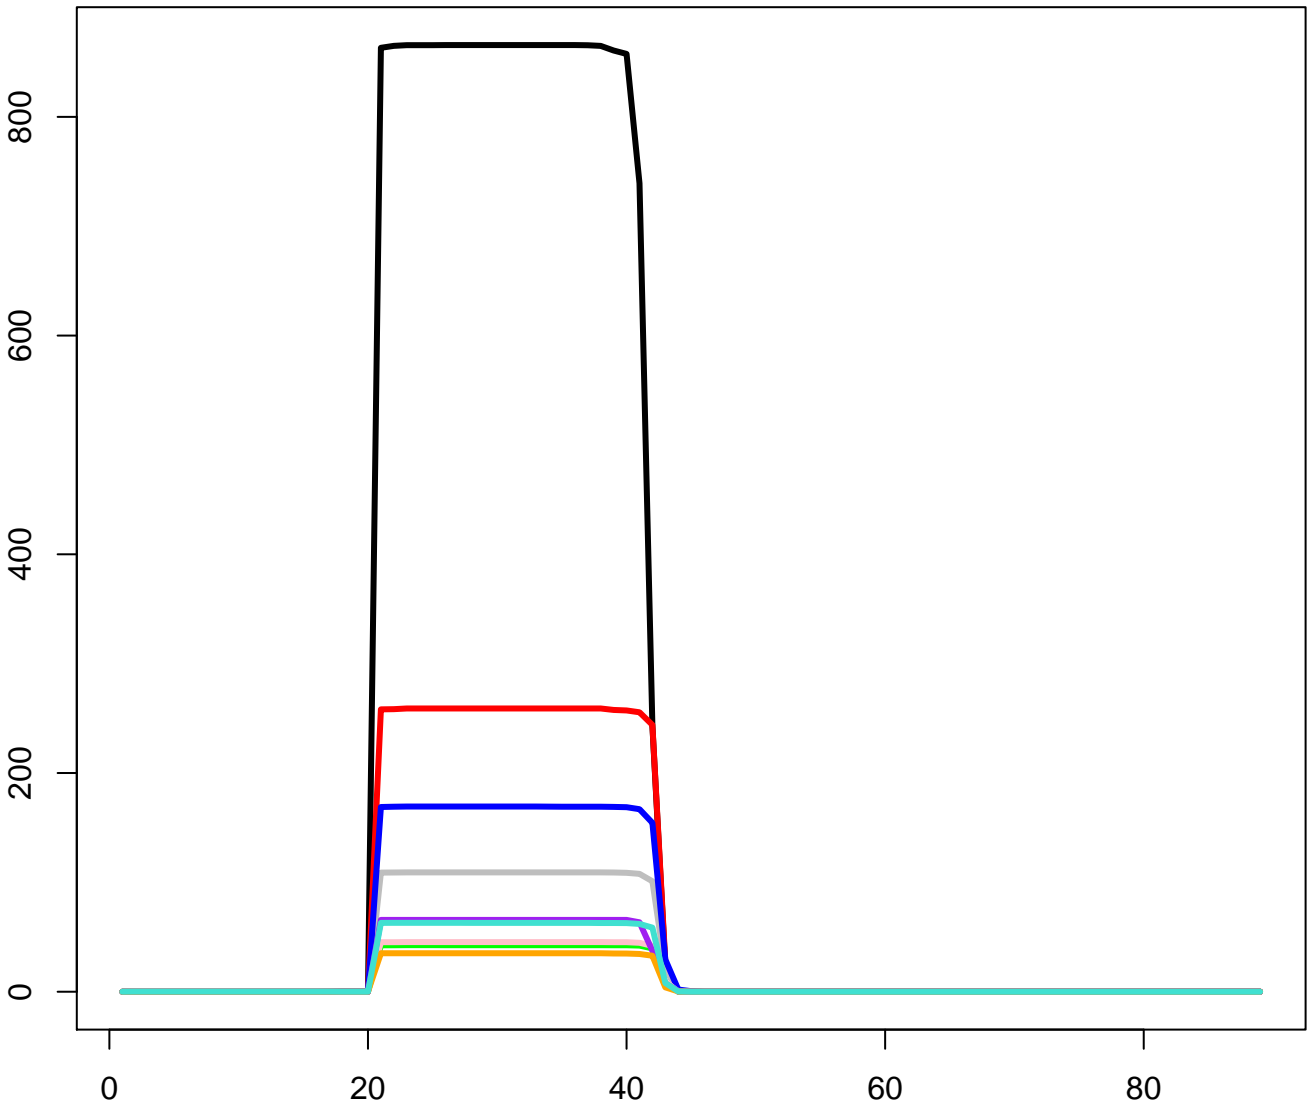

— blood — brain — heart — kidney — lung — ovary — skin — muscle — testis

# 6\_28215949-28216014(+)\_mir-6506\_low

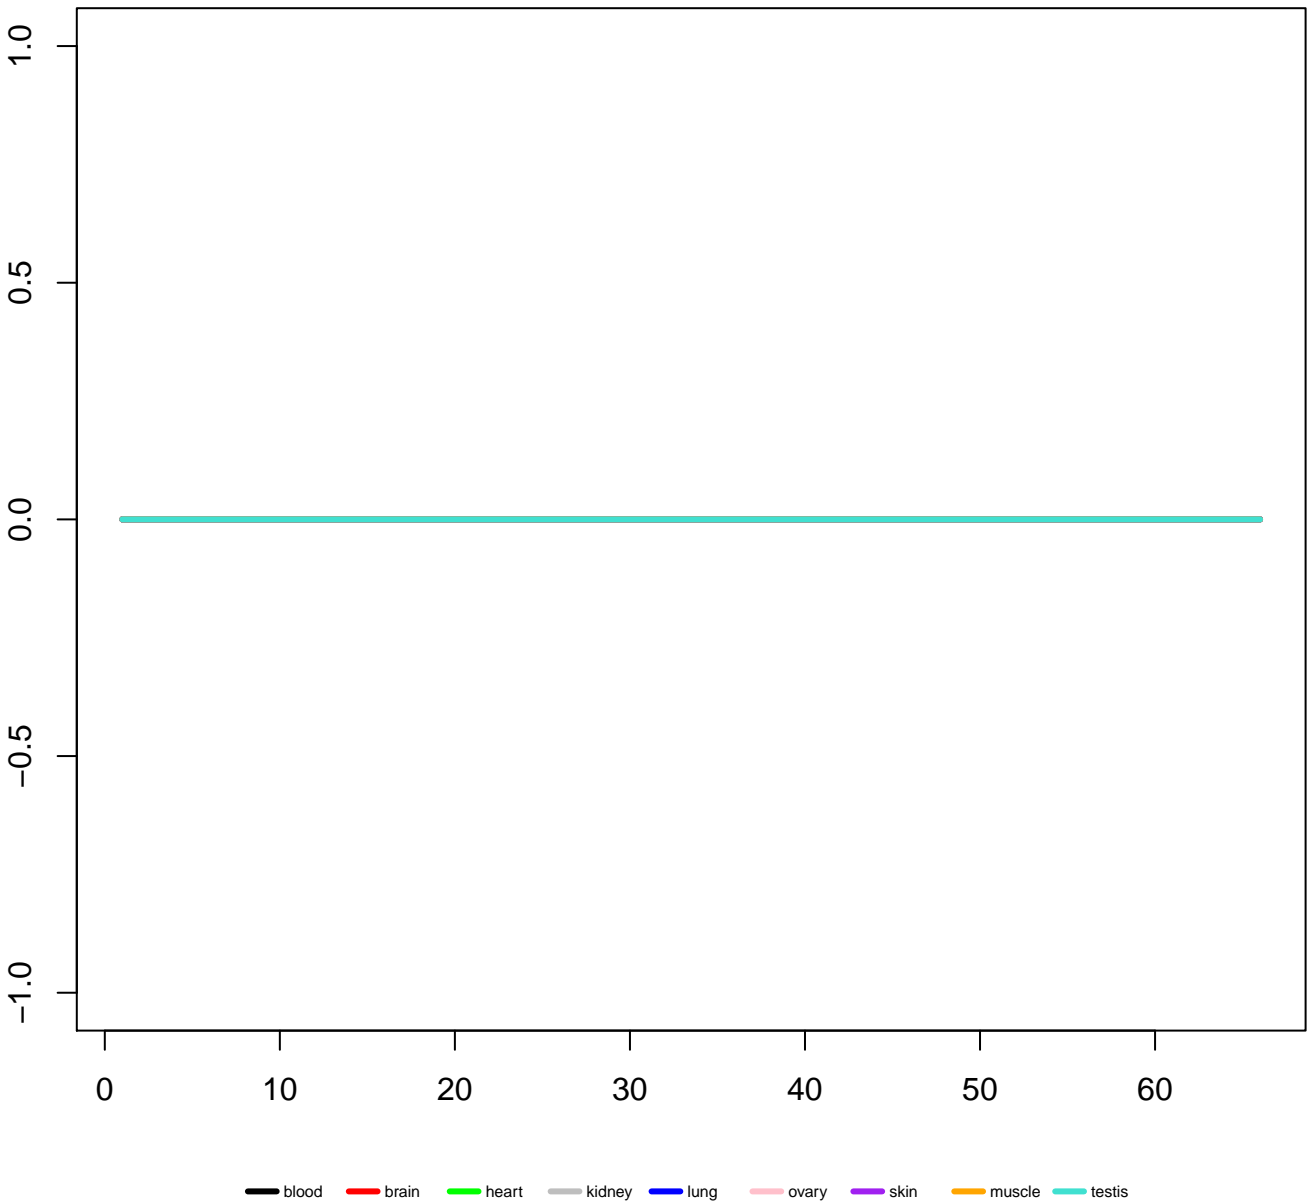

# 6\_28873135-28873221(-)\_cfa-mir-365-1\_high

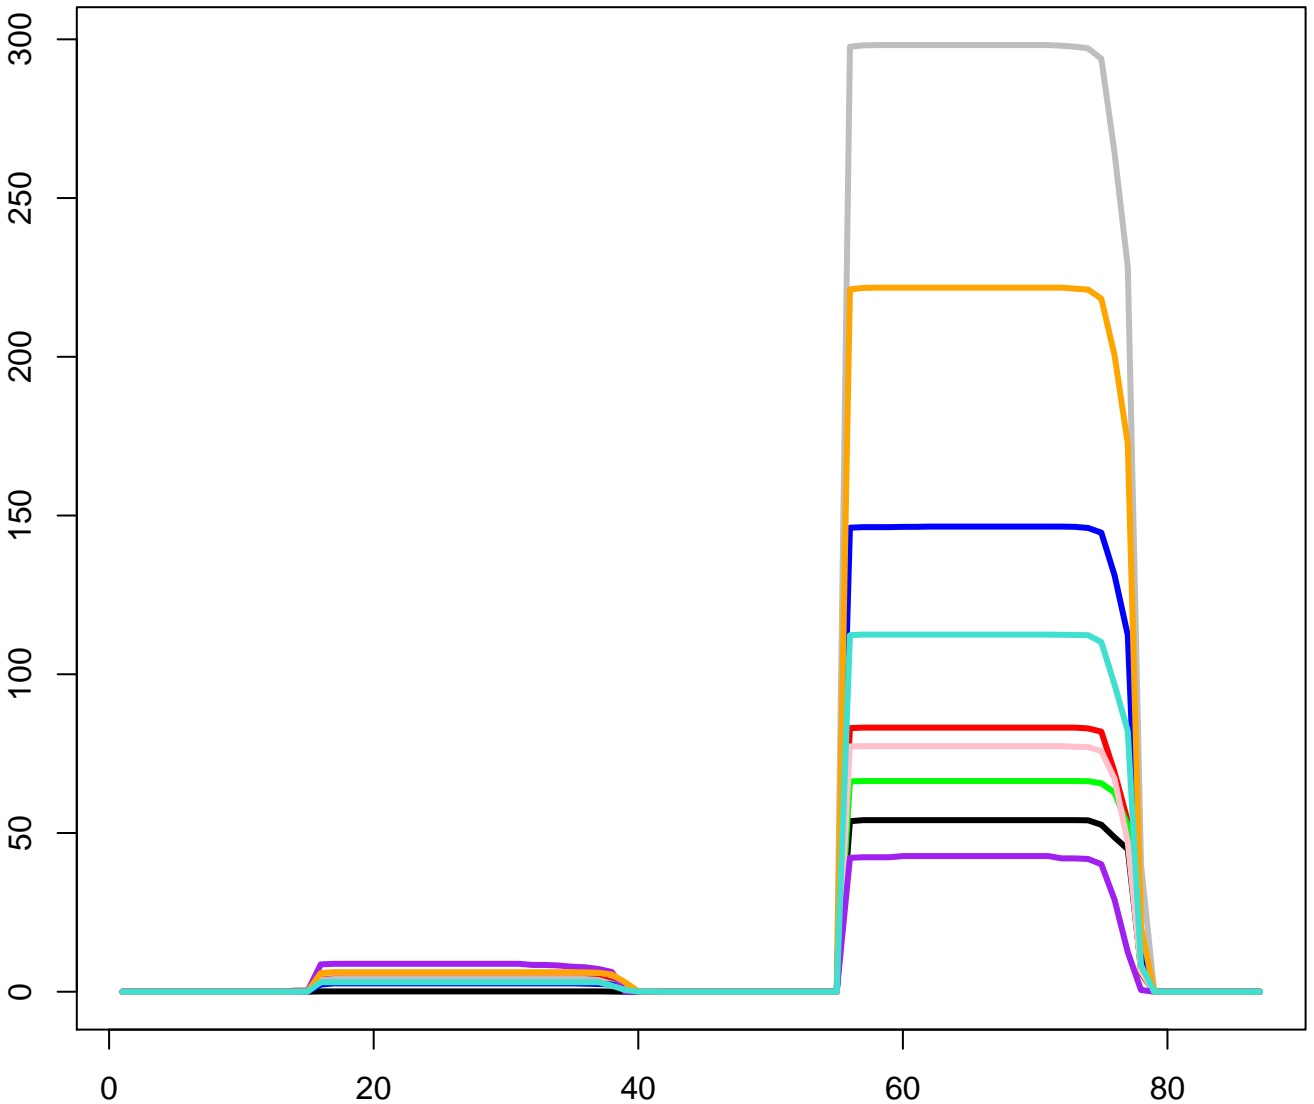

— blood — brain — heart — kidney — lung — ovary — skin — muscle — testis

# 6\_28878050-28878108(-)\_cfa-mir-193b\_high

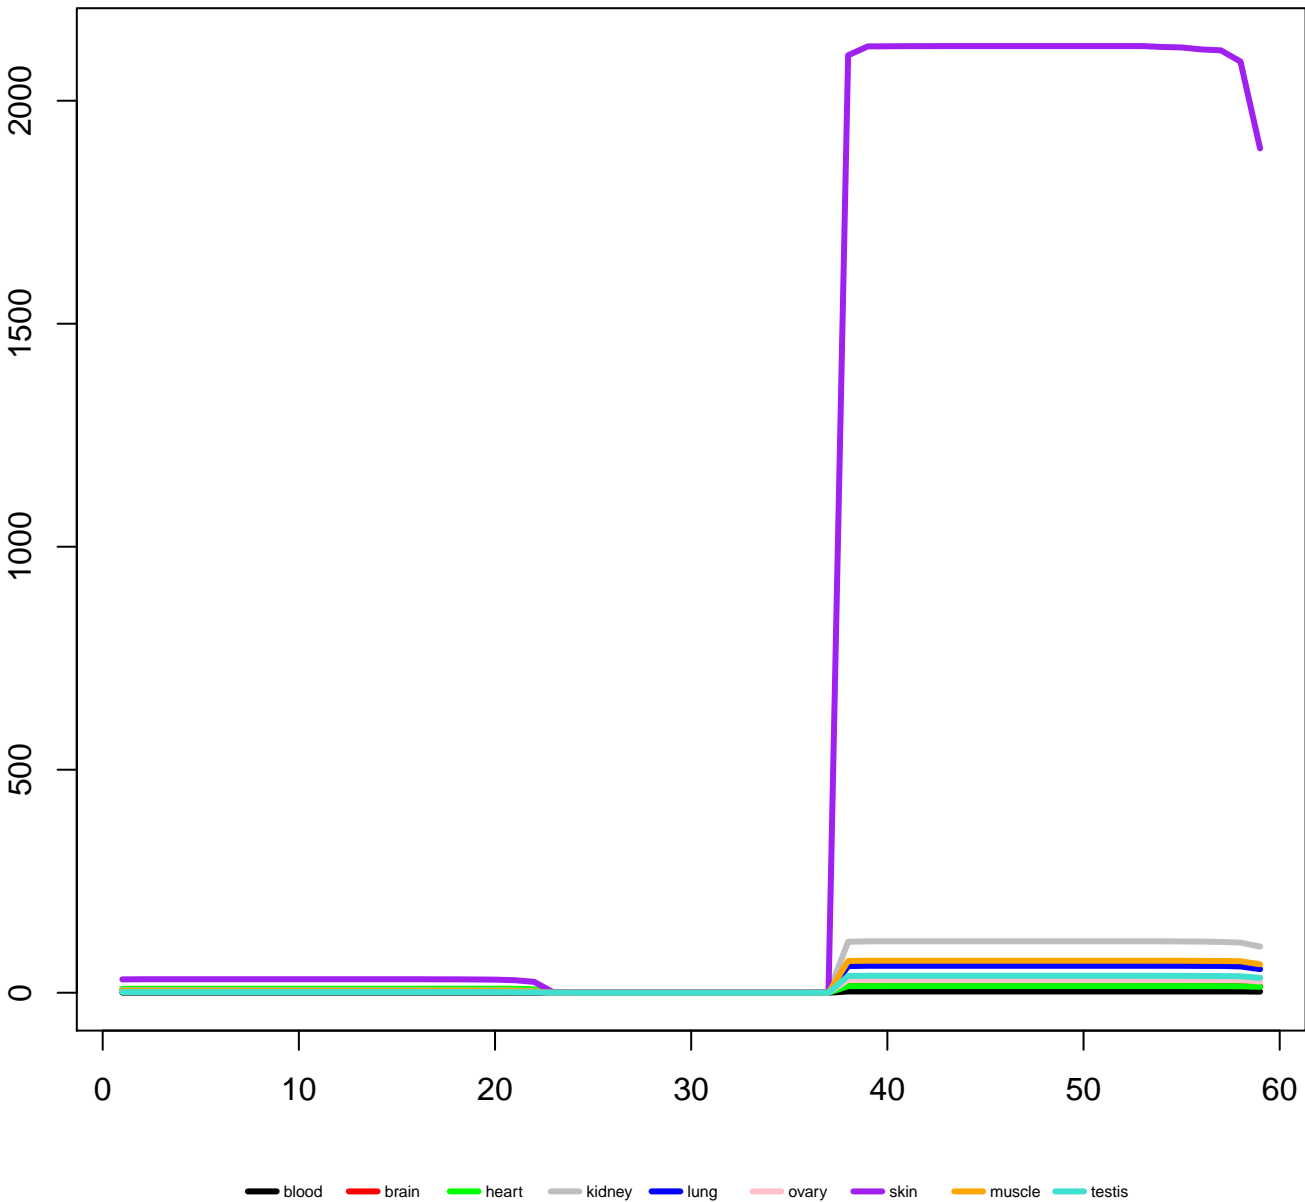

# 6\_31385077-31385179(-)\_cfa-mir-8874\_low

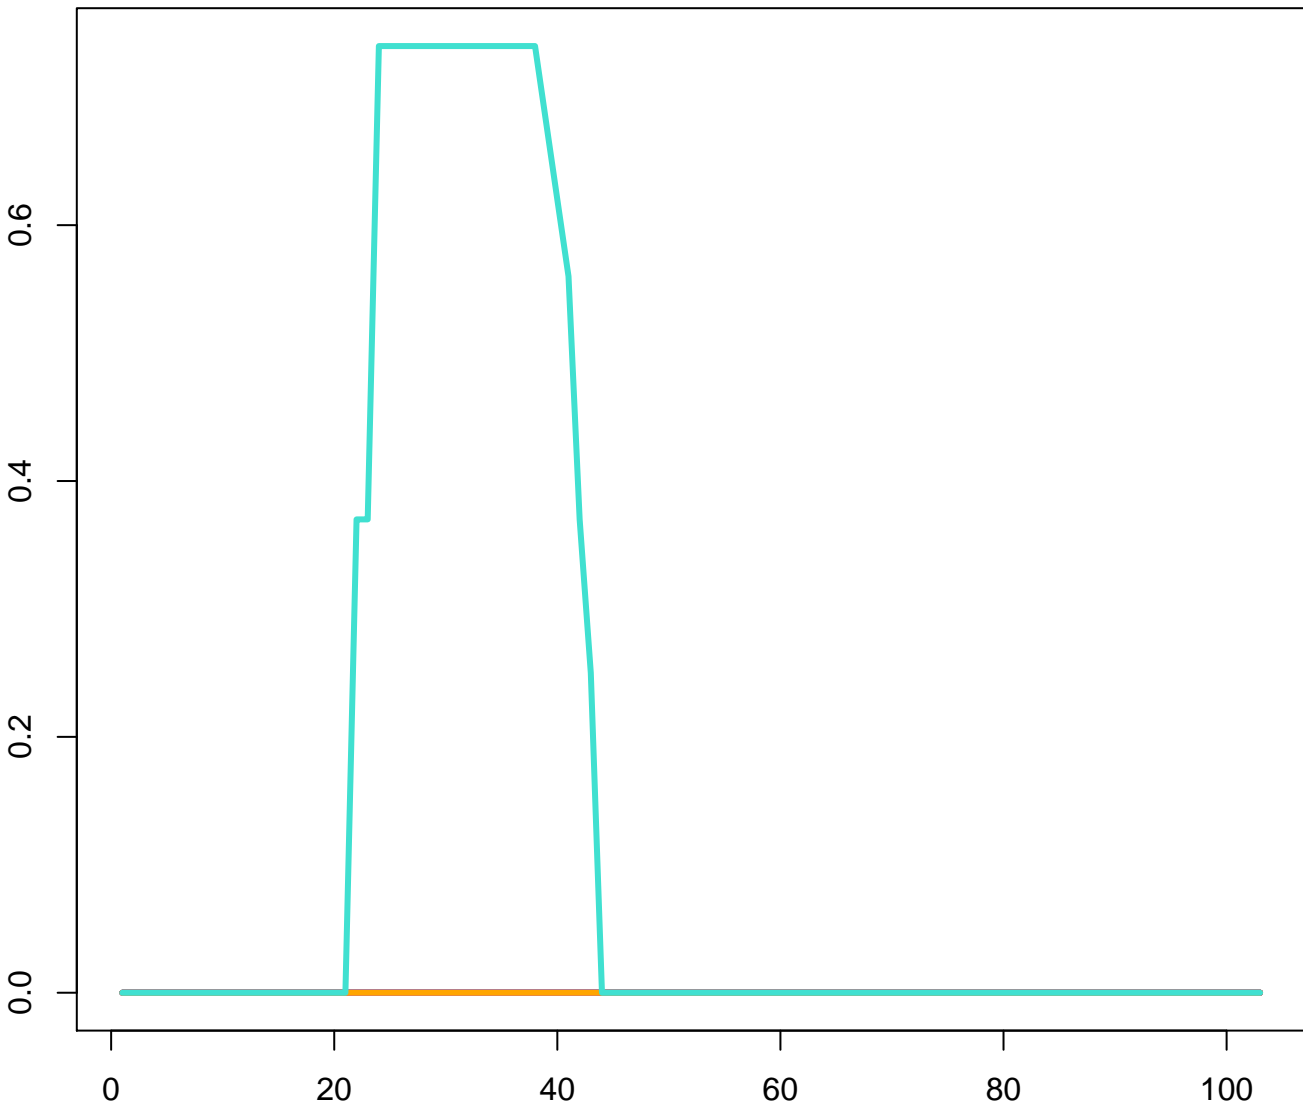

blood brain heart kidney lung ovary skin muscle testis



# 6\_38309139-38309217(+)\_mir-5125\_low

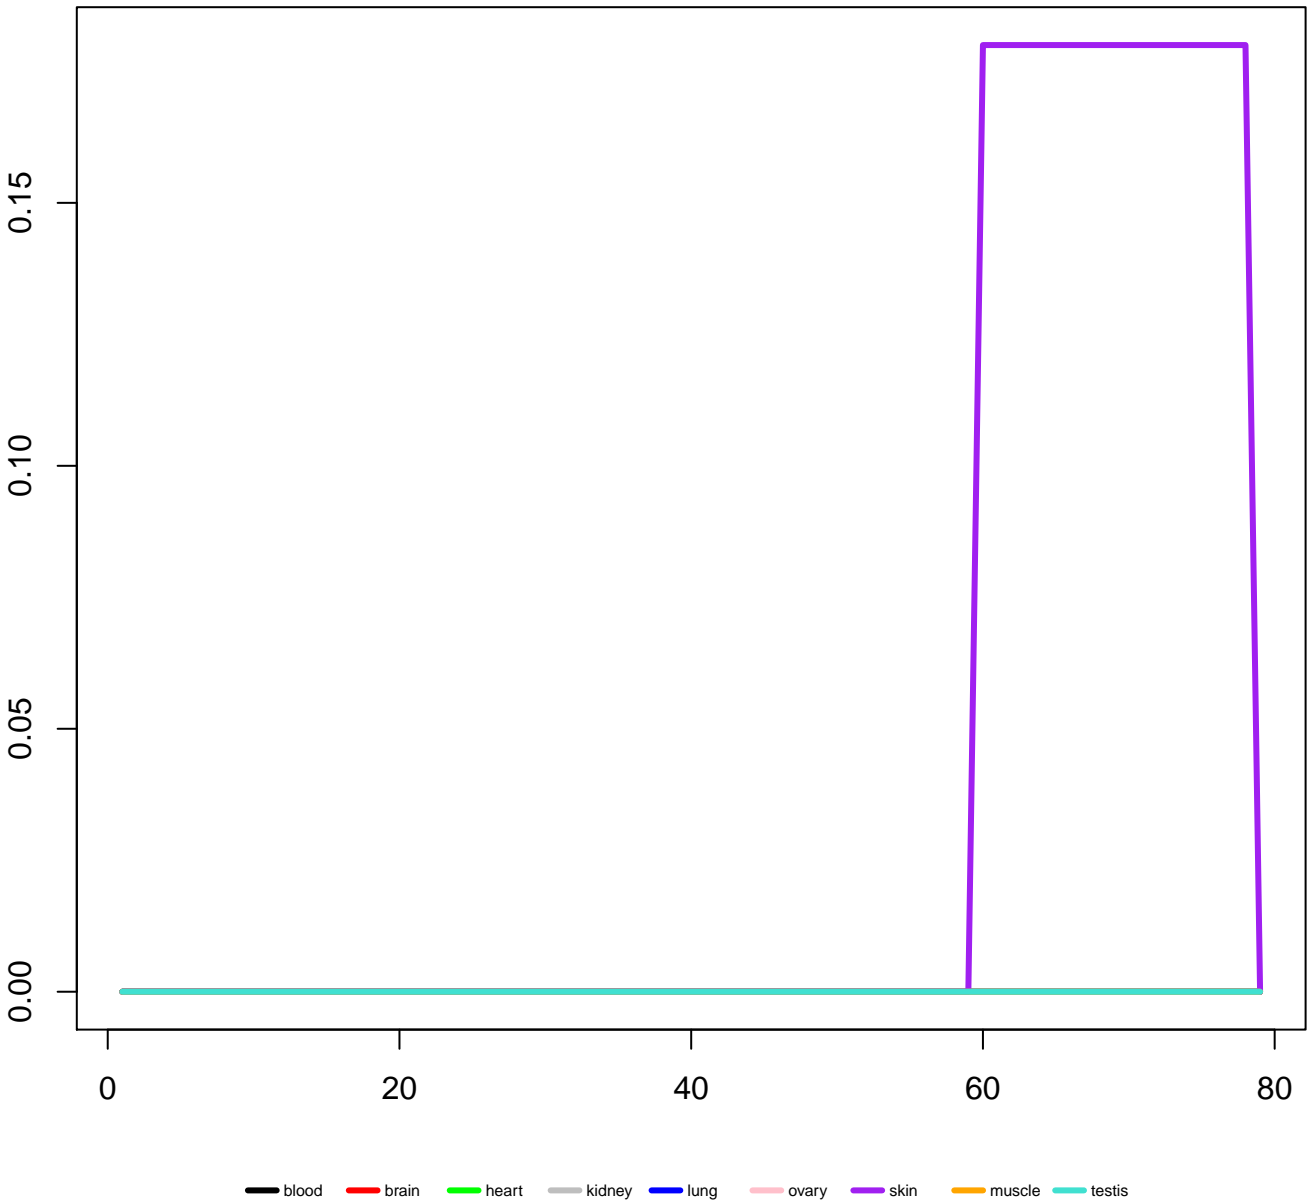



# 6\_39752034-39752162(+)\_cfa-mir-8877\_low

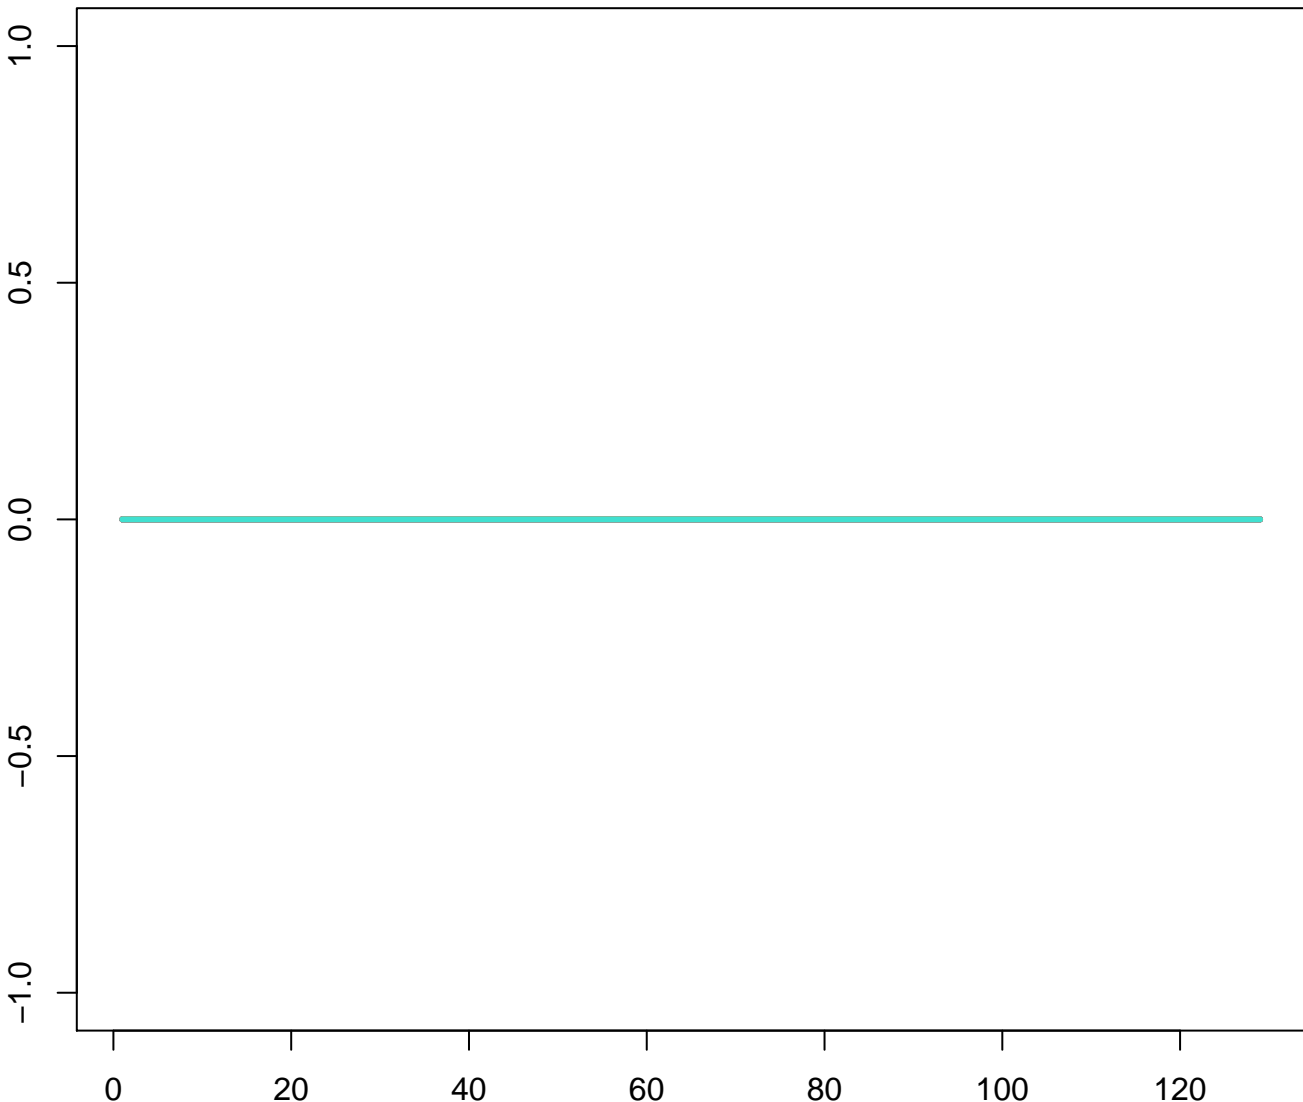

blood brain heart kidney lung ovary skin muscle testis

# 6\_39826605-39826676(-)\_mir-662\_low

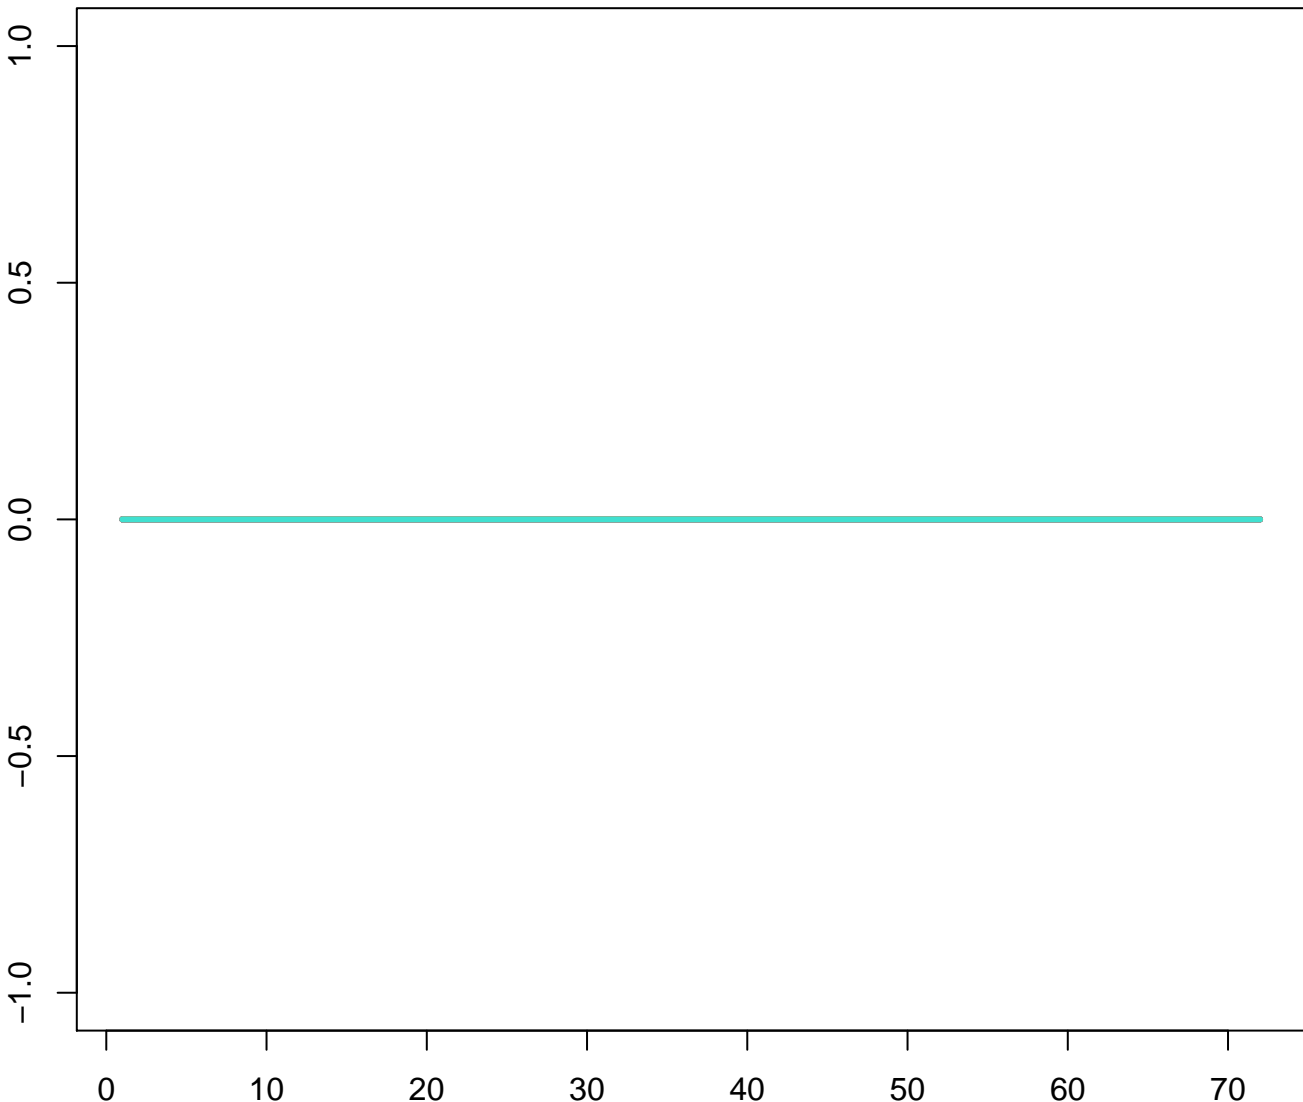

blood brain heart kidney lung ovary skin muscle testis

# 6\_40559217-40559329(-)\_cfa-mir-8799f\_low

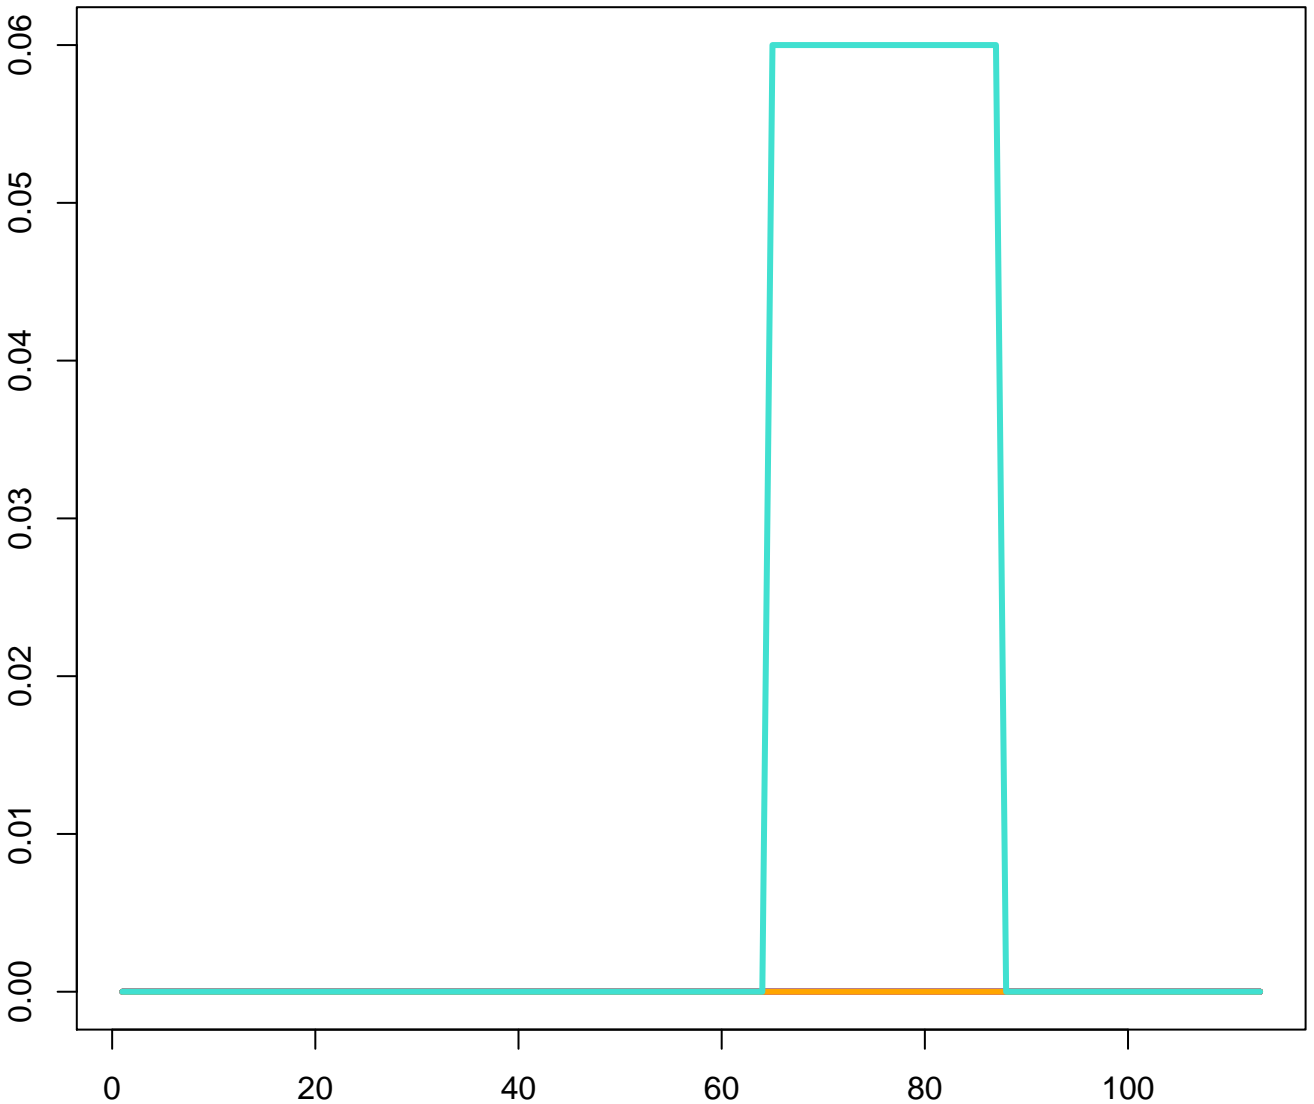

blood brain heart kidney lung ovary skin muscle testis

# 6\_41017022-41017154(+)\_cfa-mir-8799e-1\_low



blood brain heart kidney lung ovary skin muscle testis

# 6\_41185994-41186126(-)\_cfa-mir-8799e-2\_low

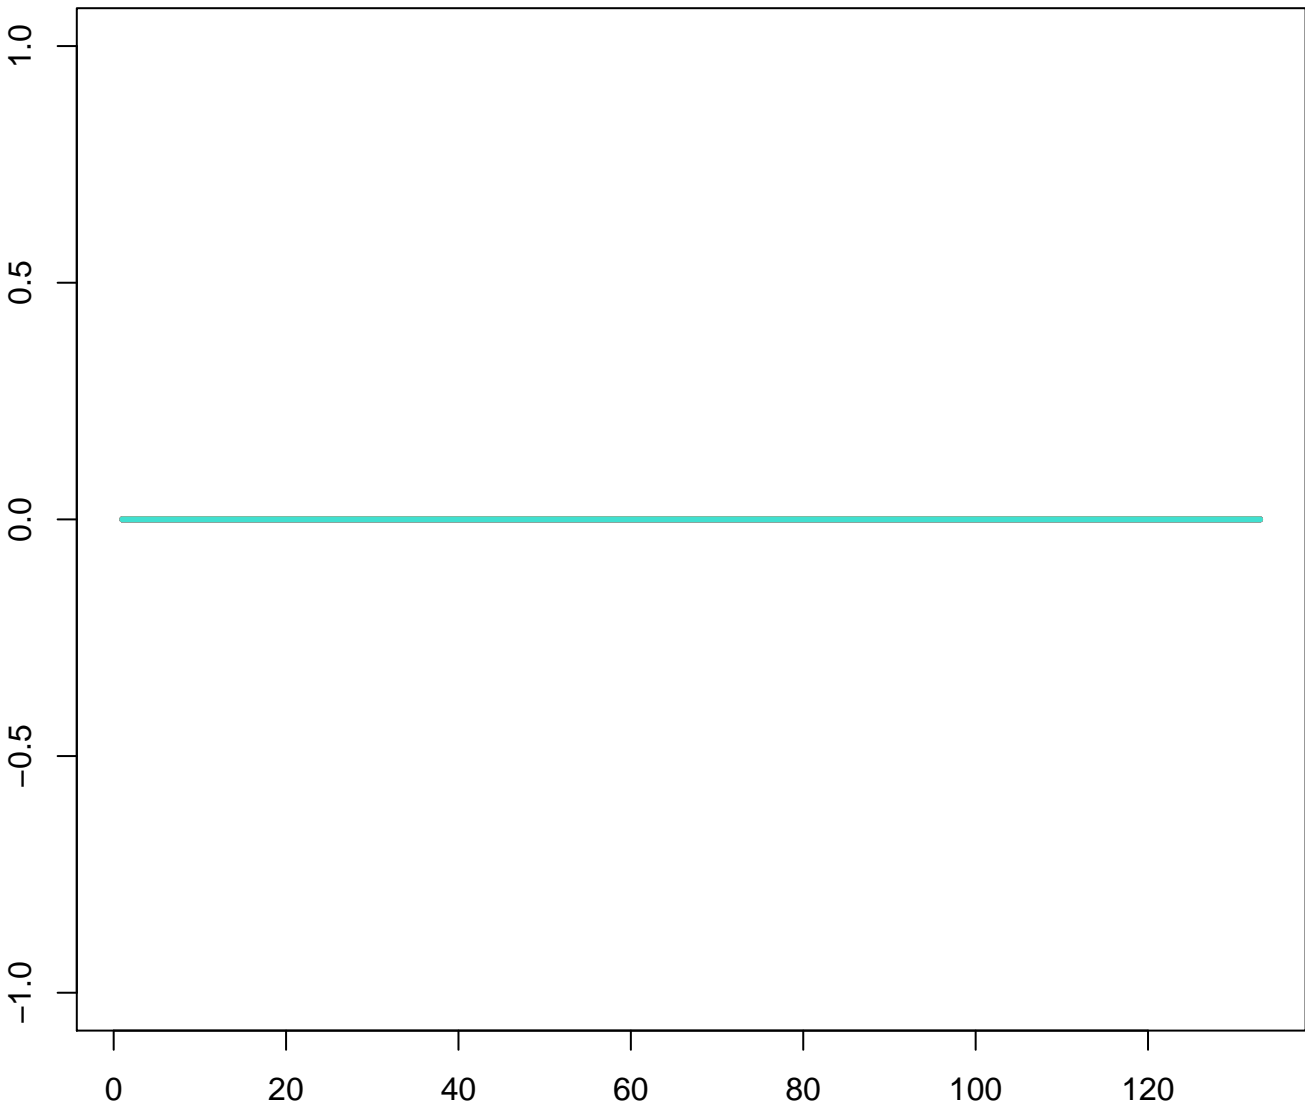

blood brain heart kidney lung ovary skin muscle testis

# 6\_42271719-42271779(-)\_cfa-mir-197\_high

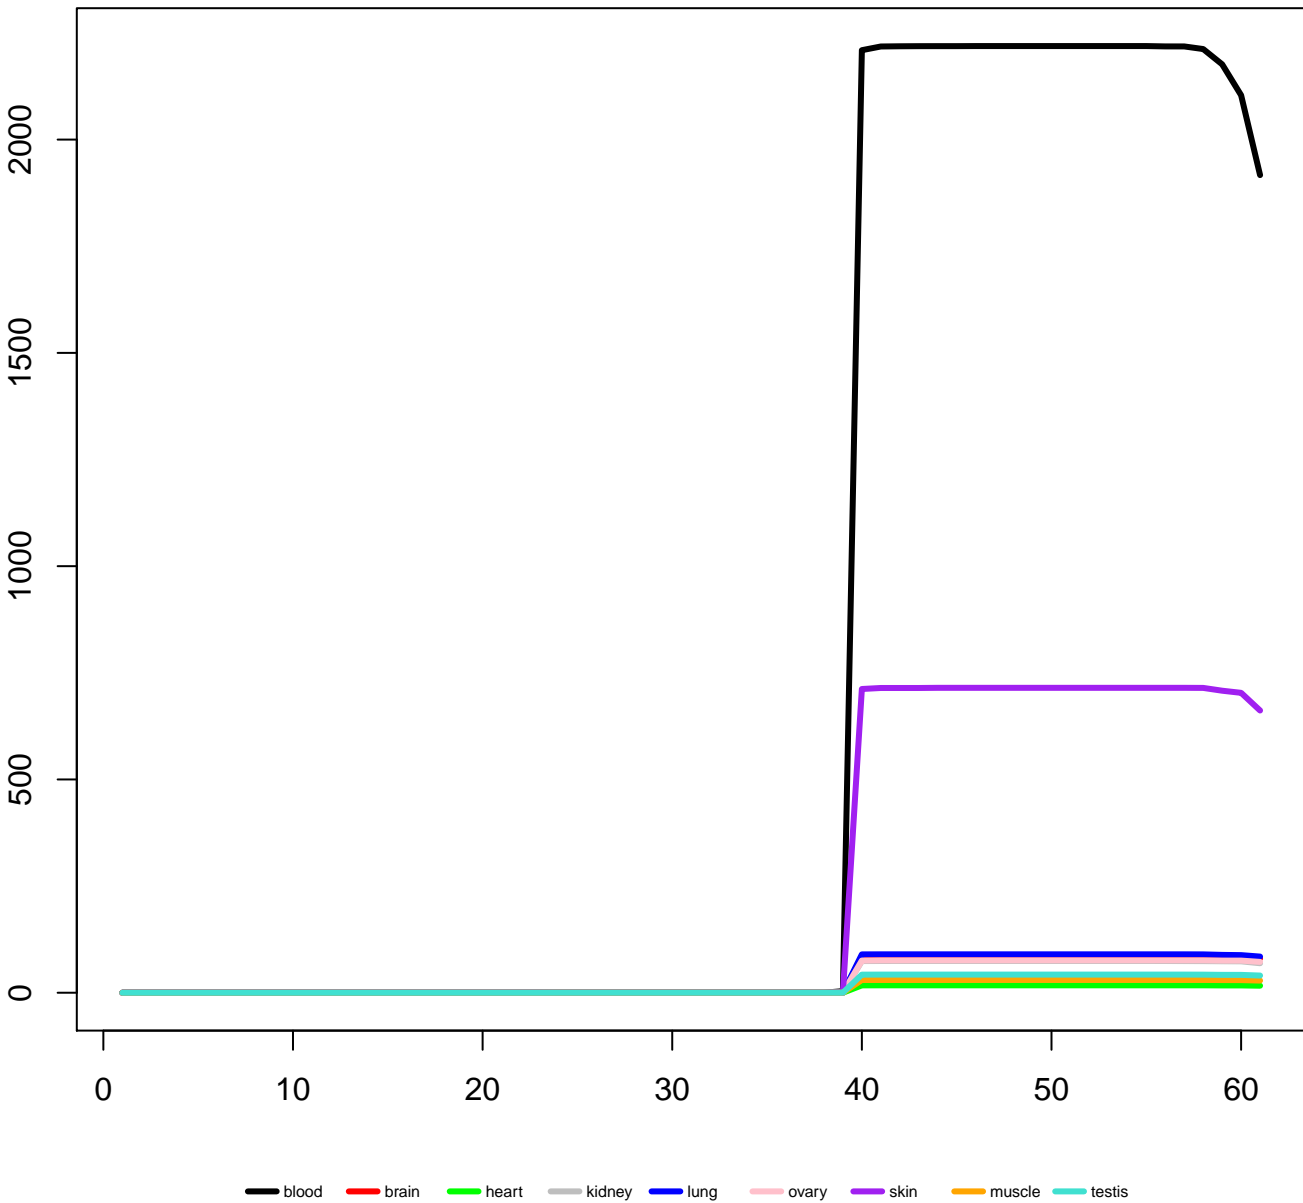



# 6\_43075720-43075852(+)\_cfa-mir-8880\_low

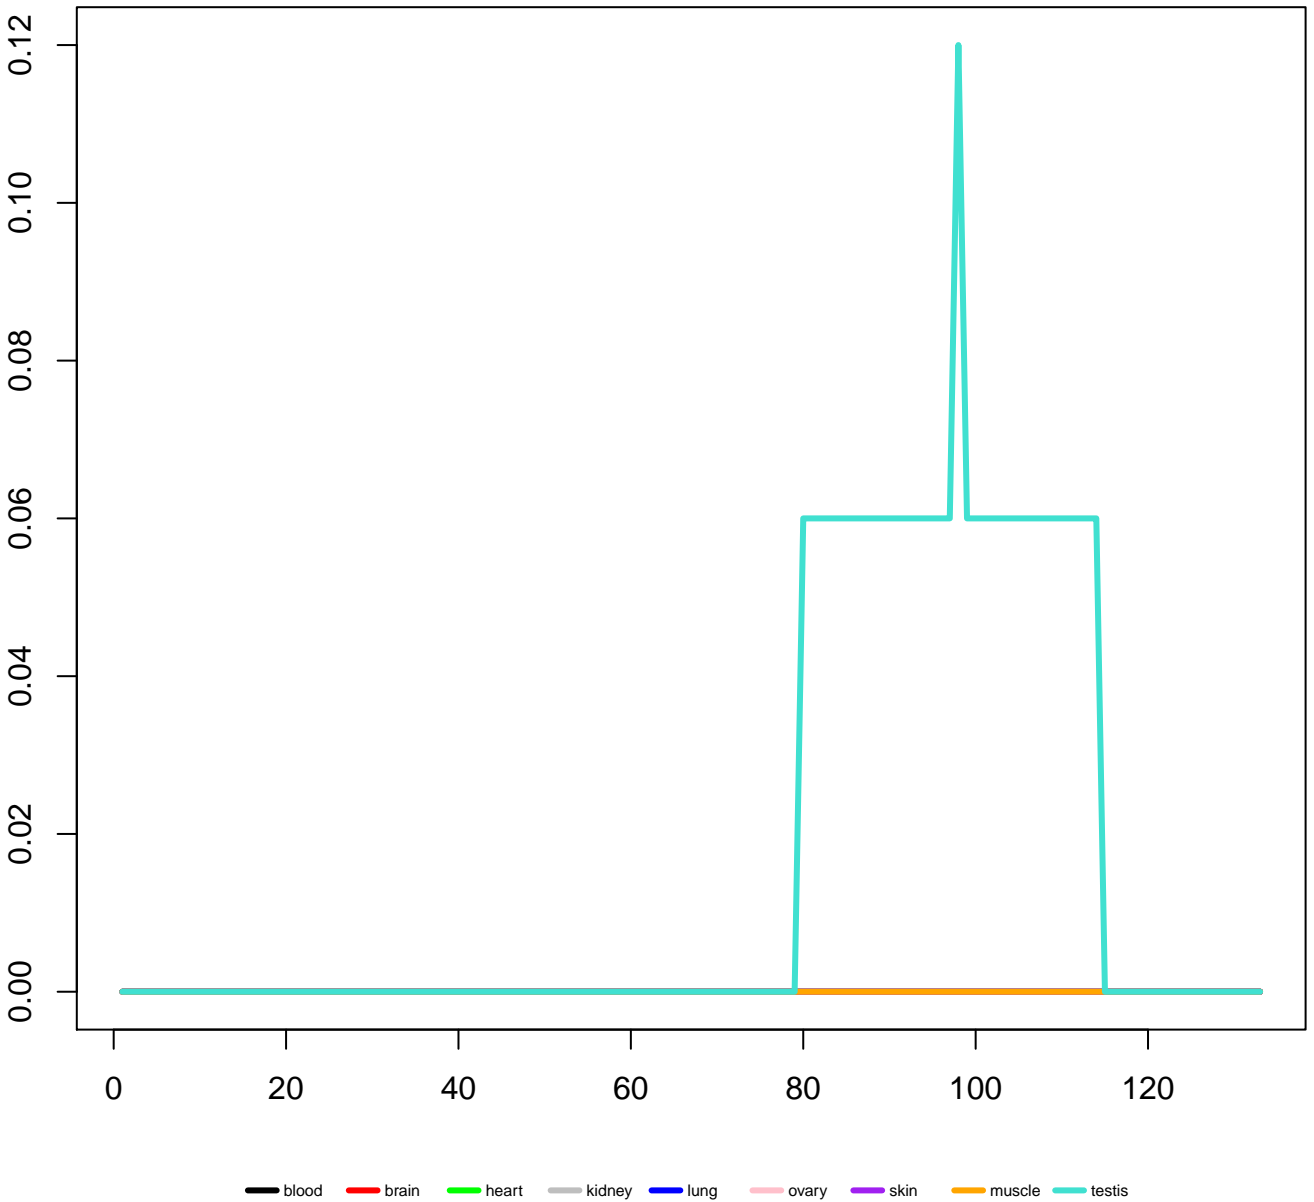

# 6\_51640476-51640530(+)\_cfa-mir-137\_high

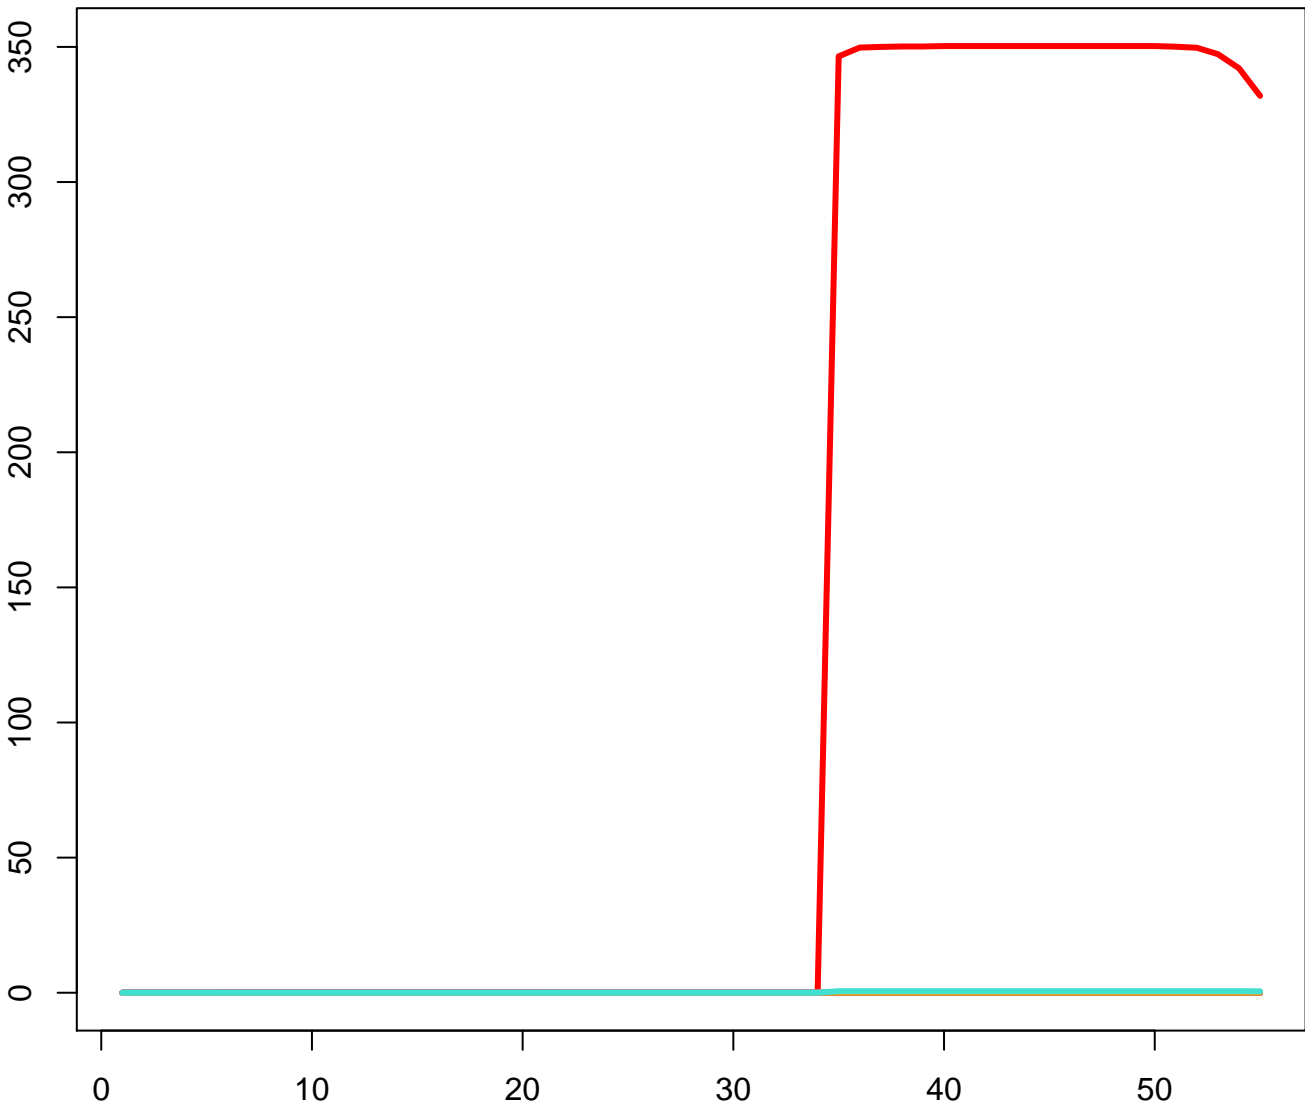

— blood — brain — heart — kidney — lung — ovary — skin — muscle — testis

# 6\_74881615-74881675(+)\_cfa-mir-186\_high

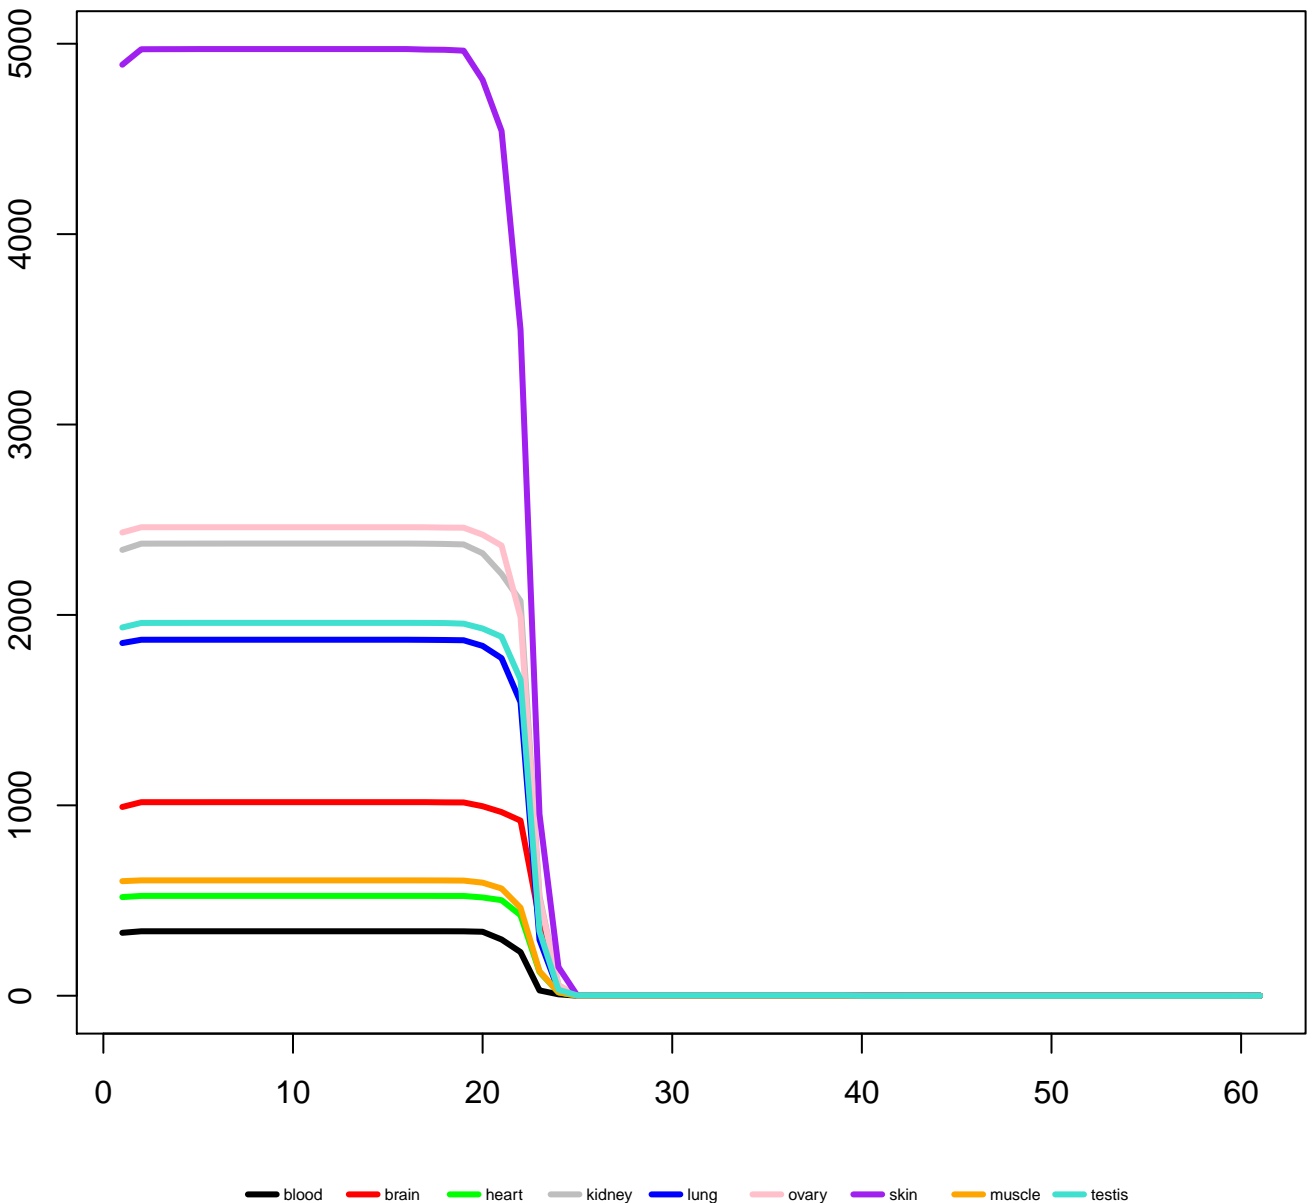

# 7\_4055465-4055526(+)\_cfa-mir-181a-1\_high

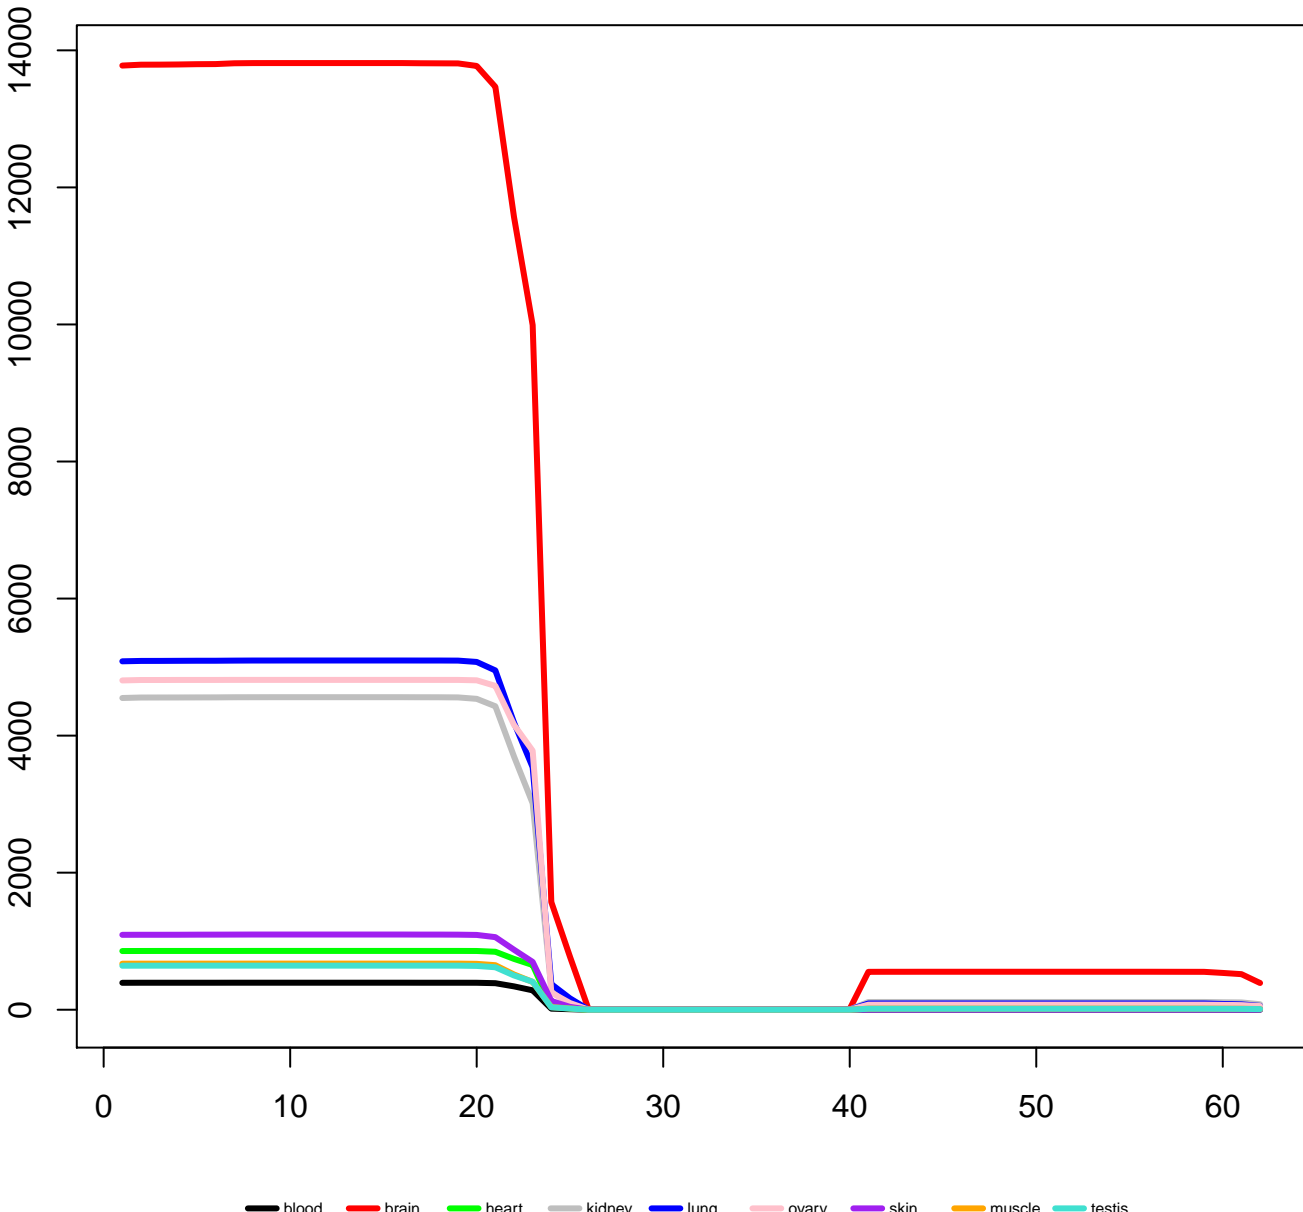













# 7\_13400475-13400560(+)\_mir-684\_low

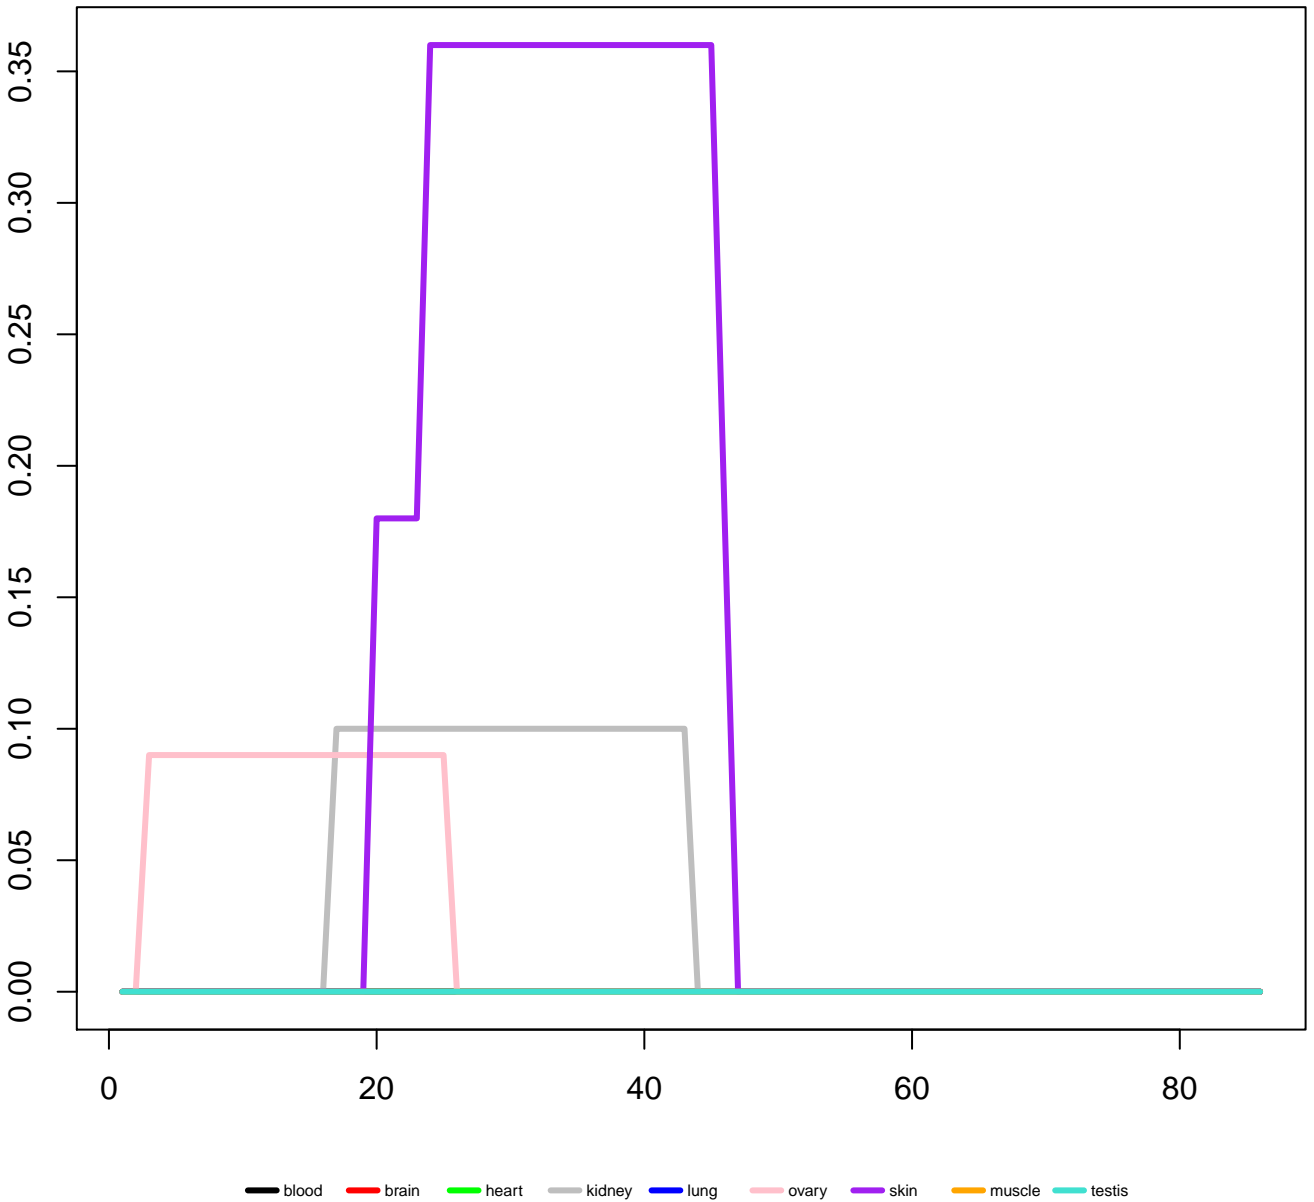

# 7\_14180244-14180333(-)\_mir-682\_low

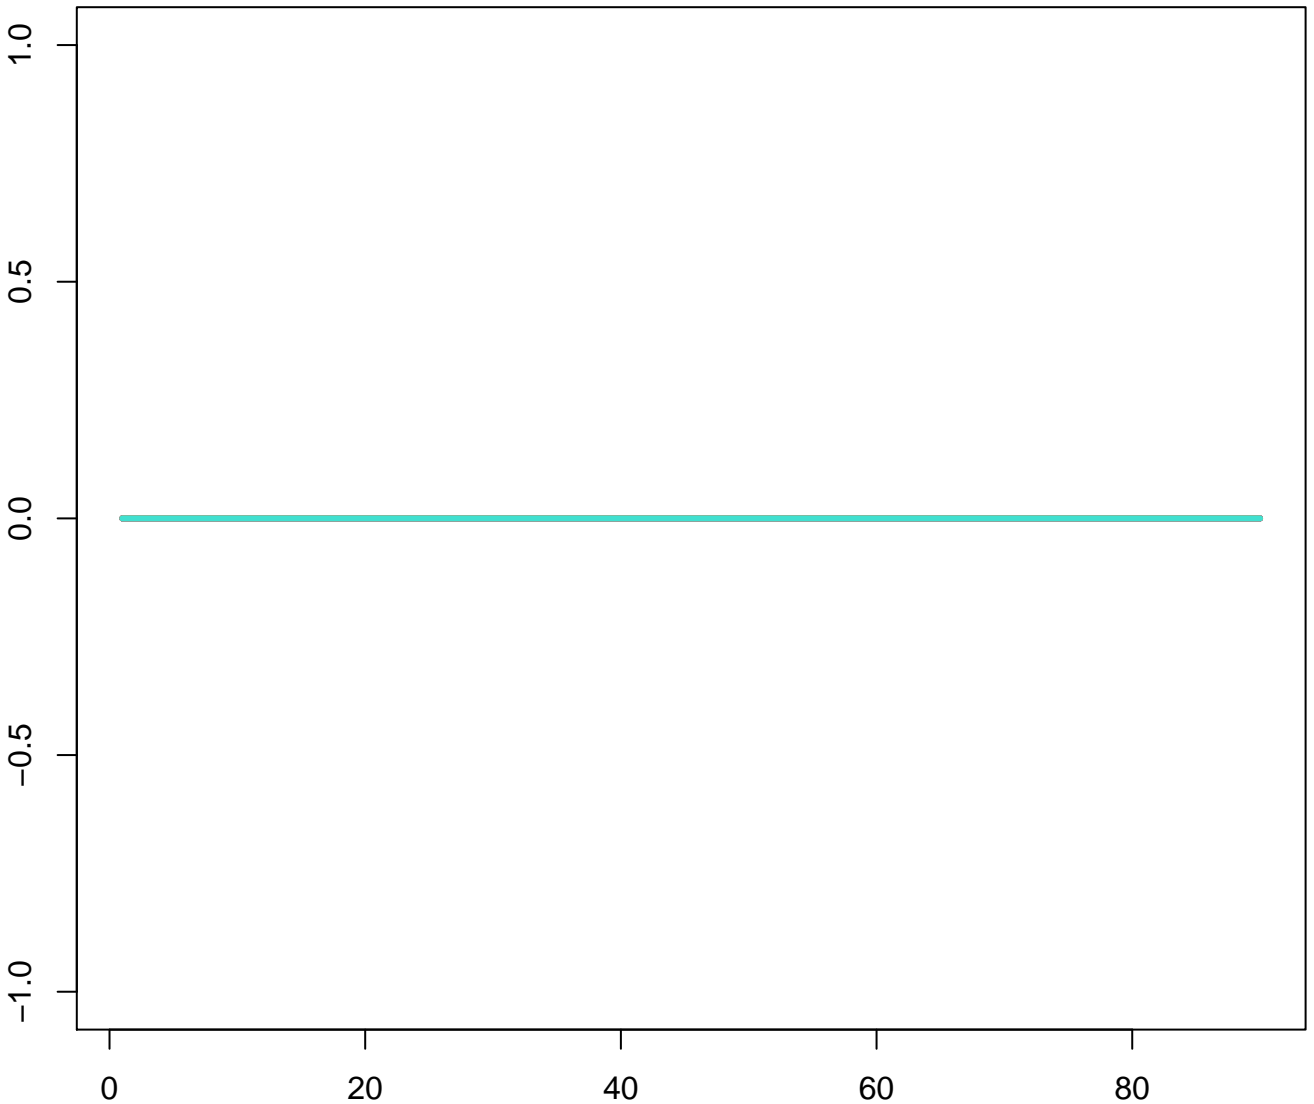

blood brain heart kidney lung ovary skin muscle testis

# 7\_22597953-22598035(+)\_cfa-mir-488\_high

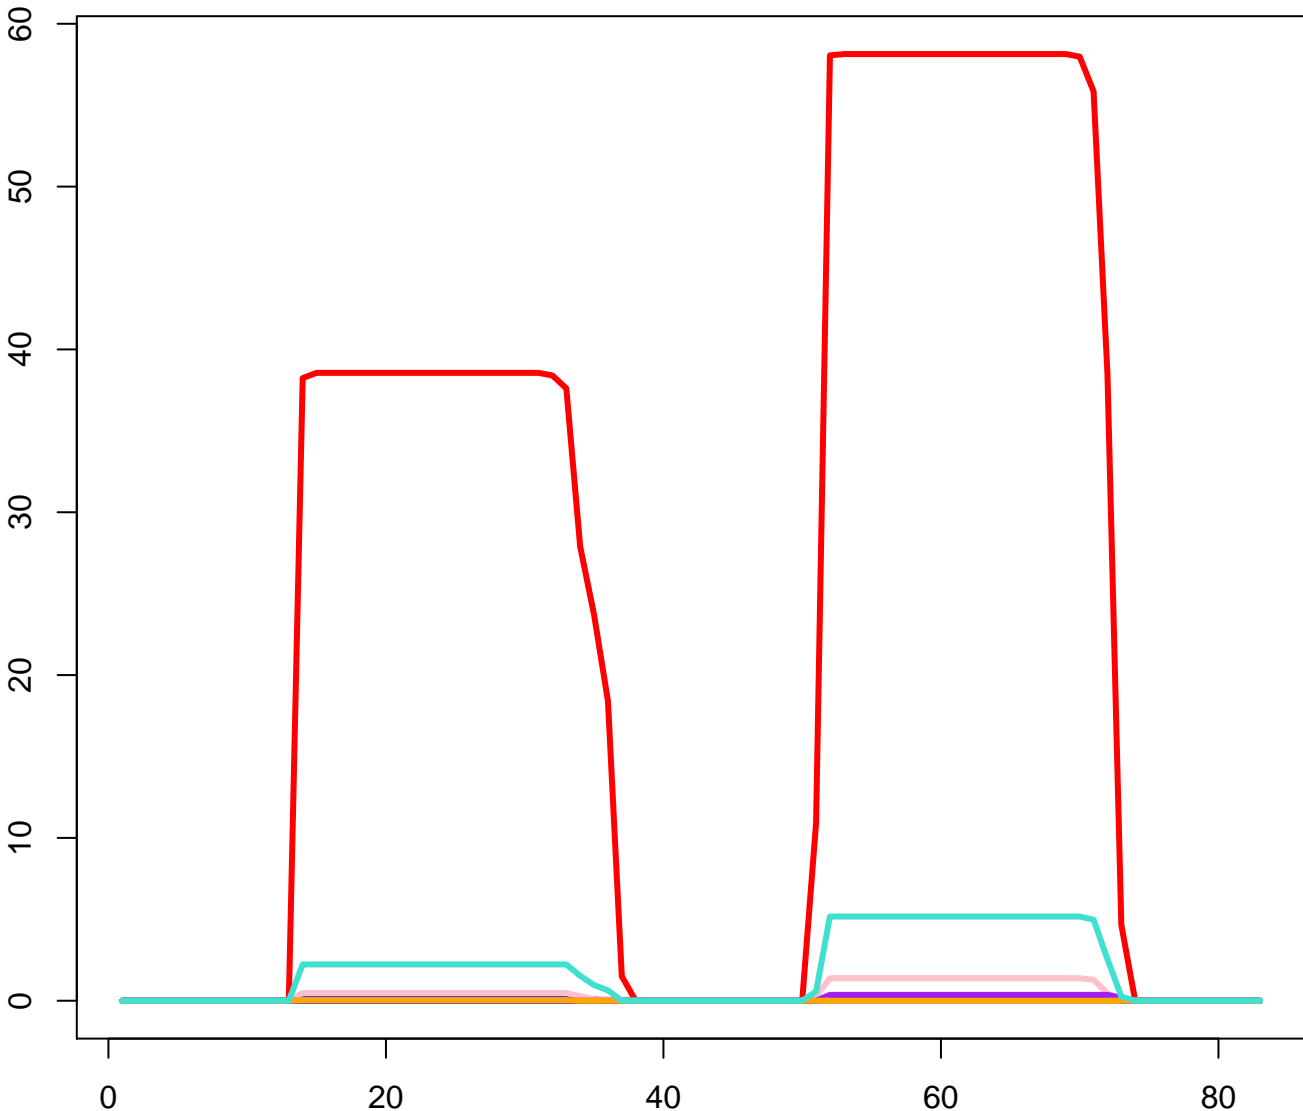

blood brain heart kidney lung ovary skin muscle testis

# 7\_23539367-23539426(+)\_cfa-mir-1843\_high

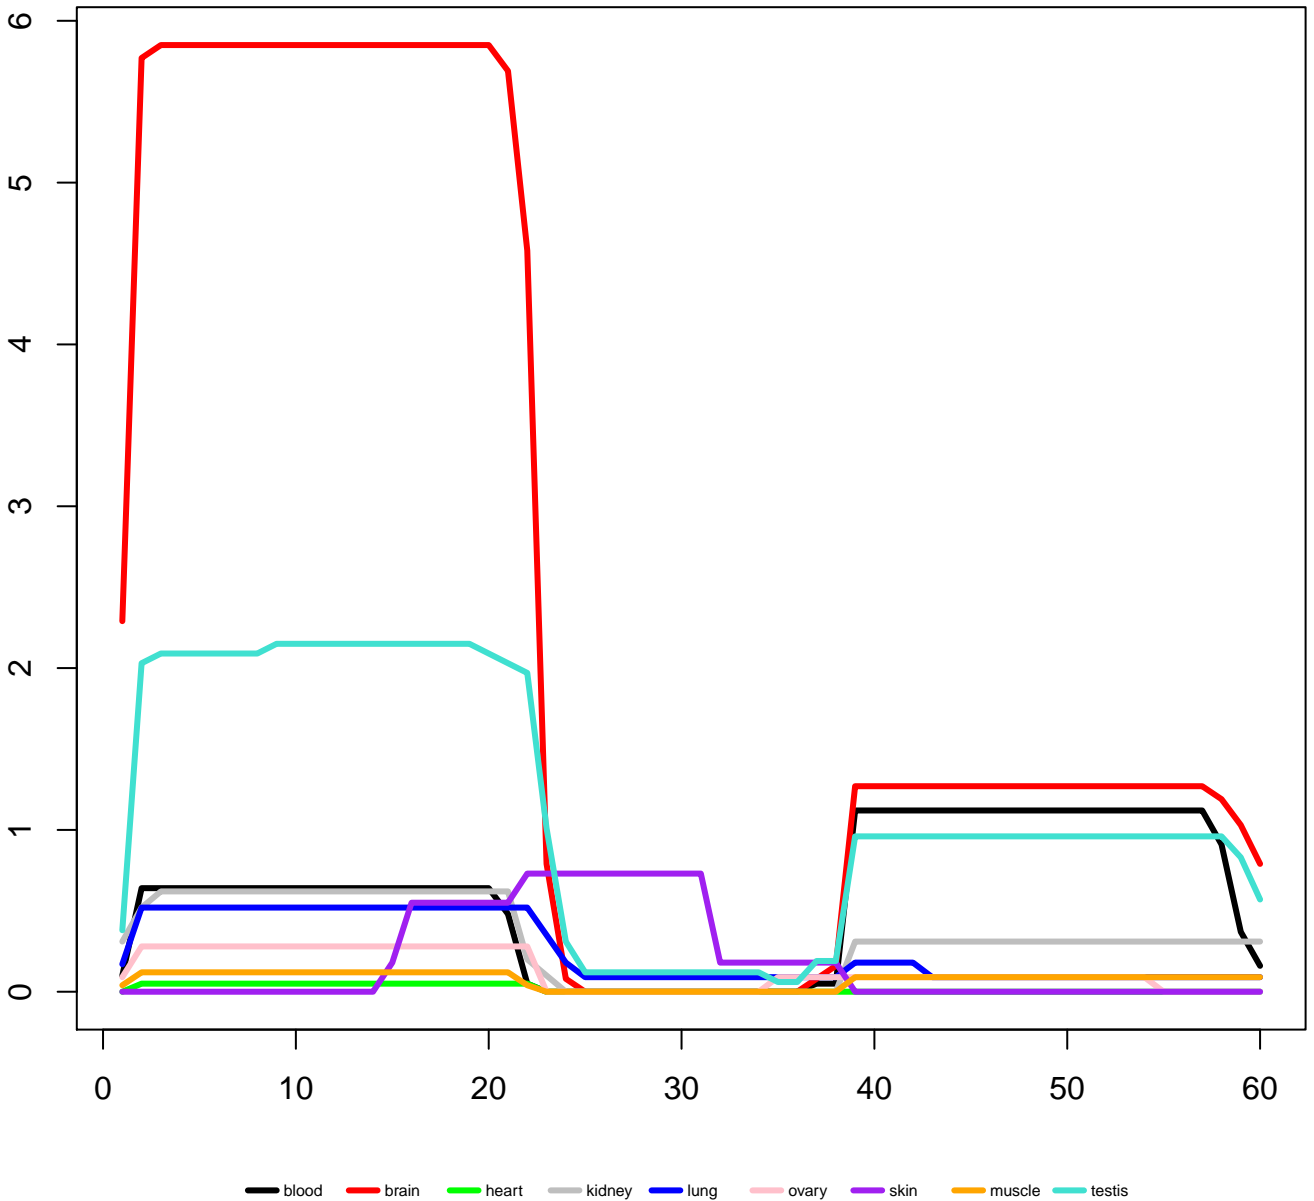

# 7\_26812766-26812824(+)\_cfa-mir-199-2\_high

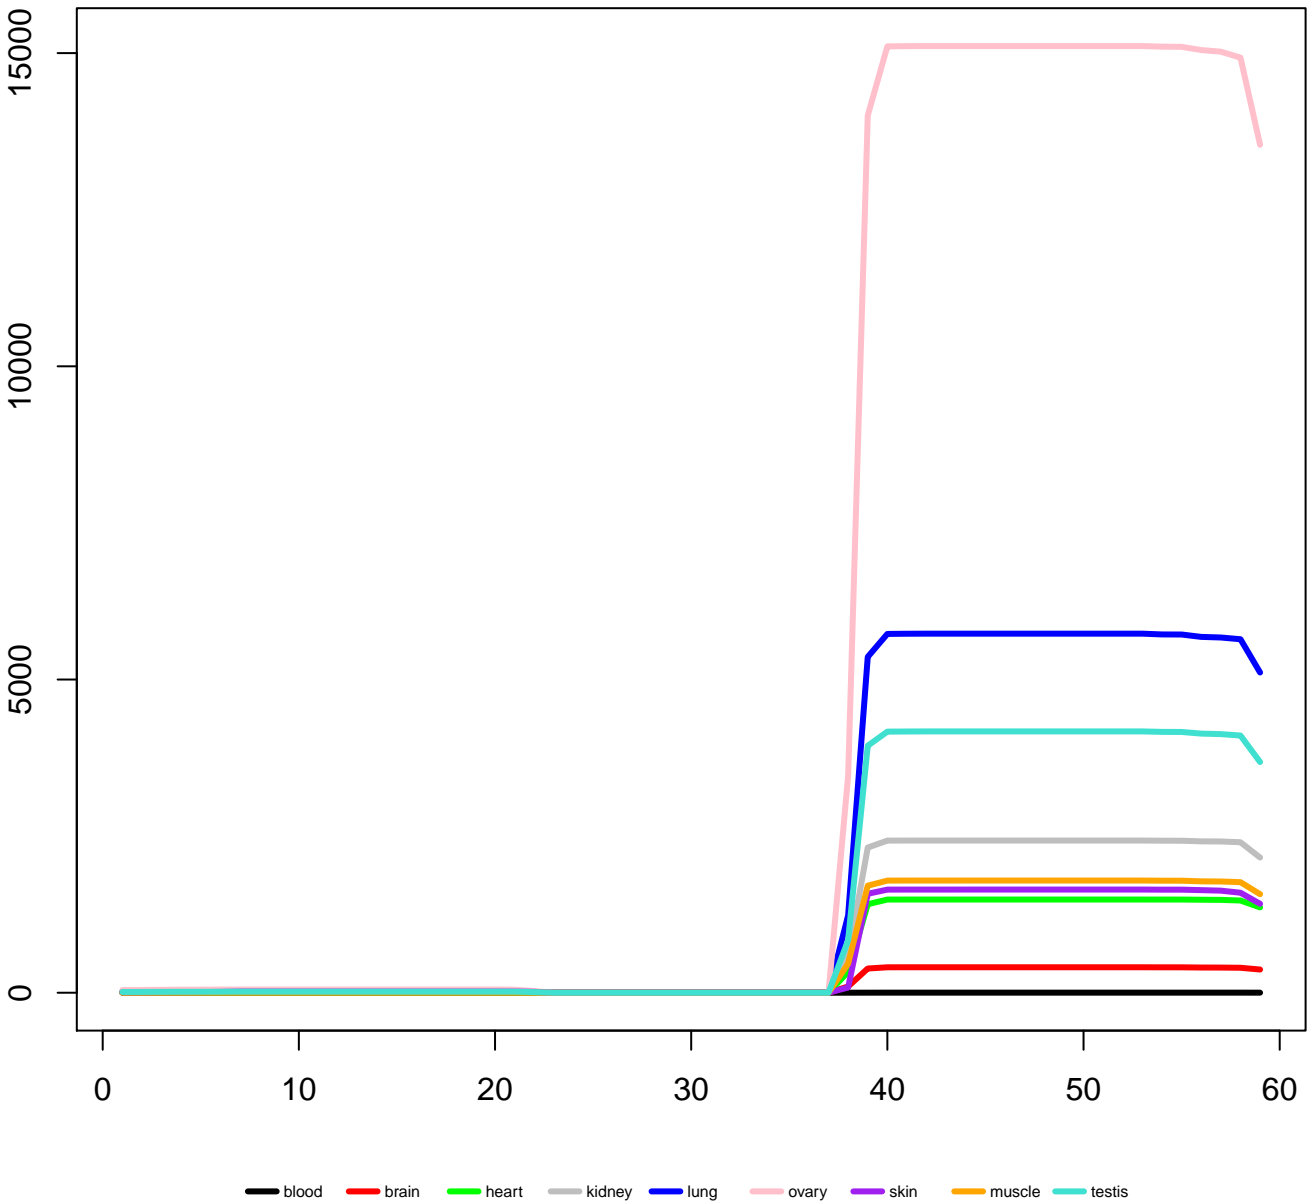



# 7\_27375123-27375185(-)\_mir-7178\_high

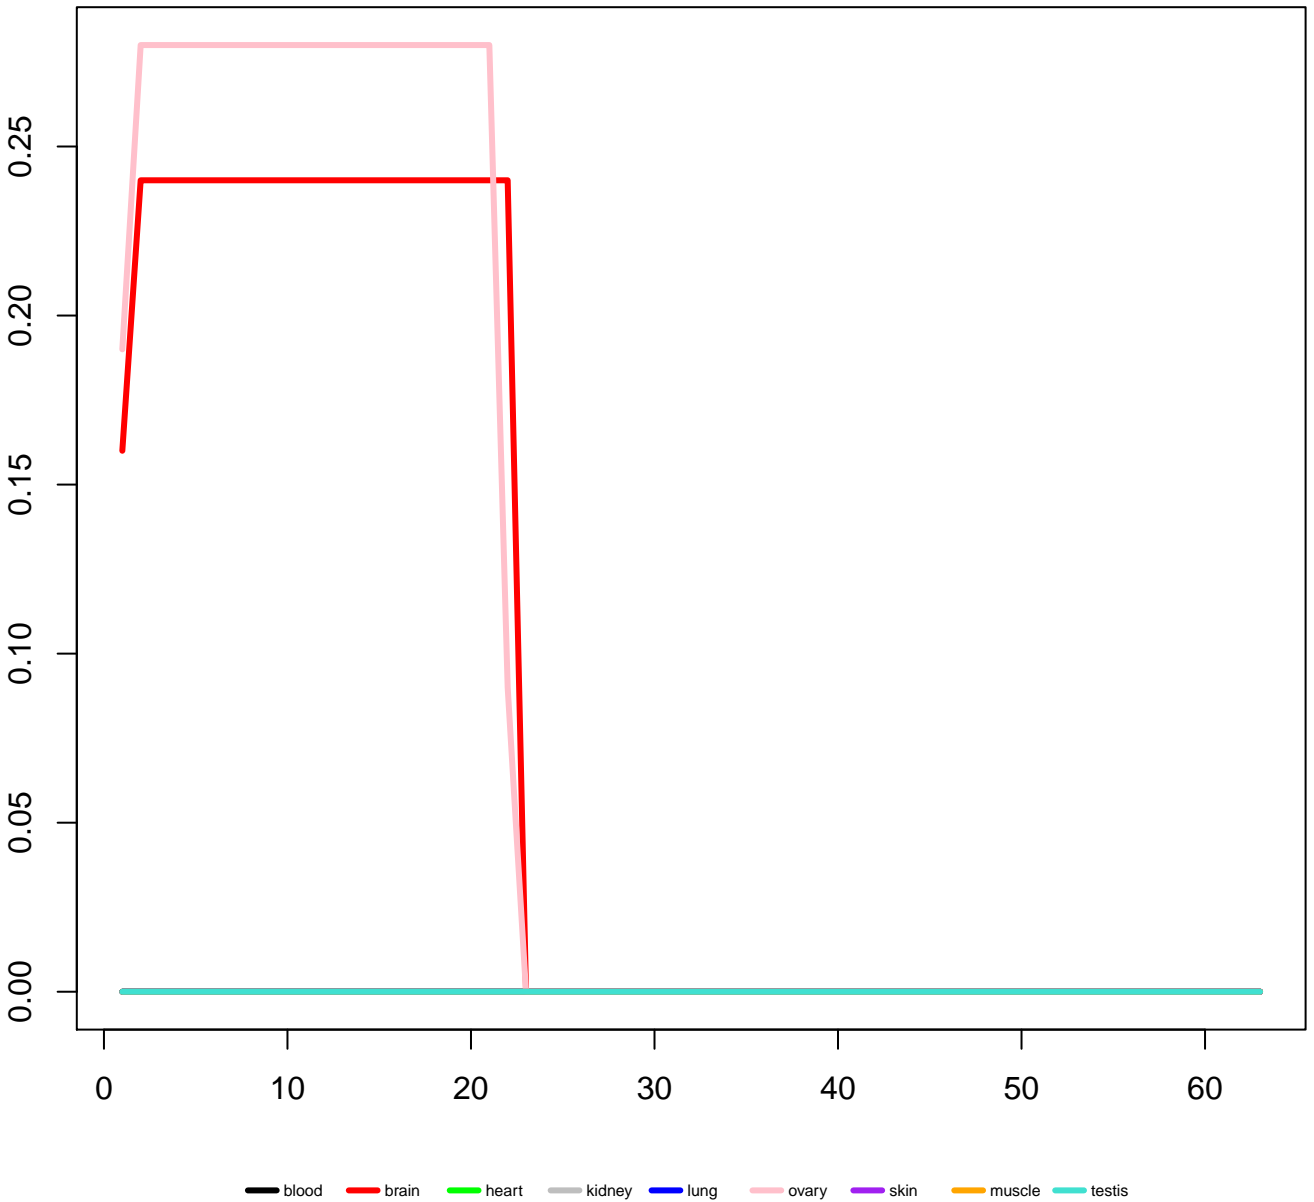



# 7\_34314838-34314894(-)\_cfa-mir-350\_high

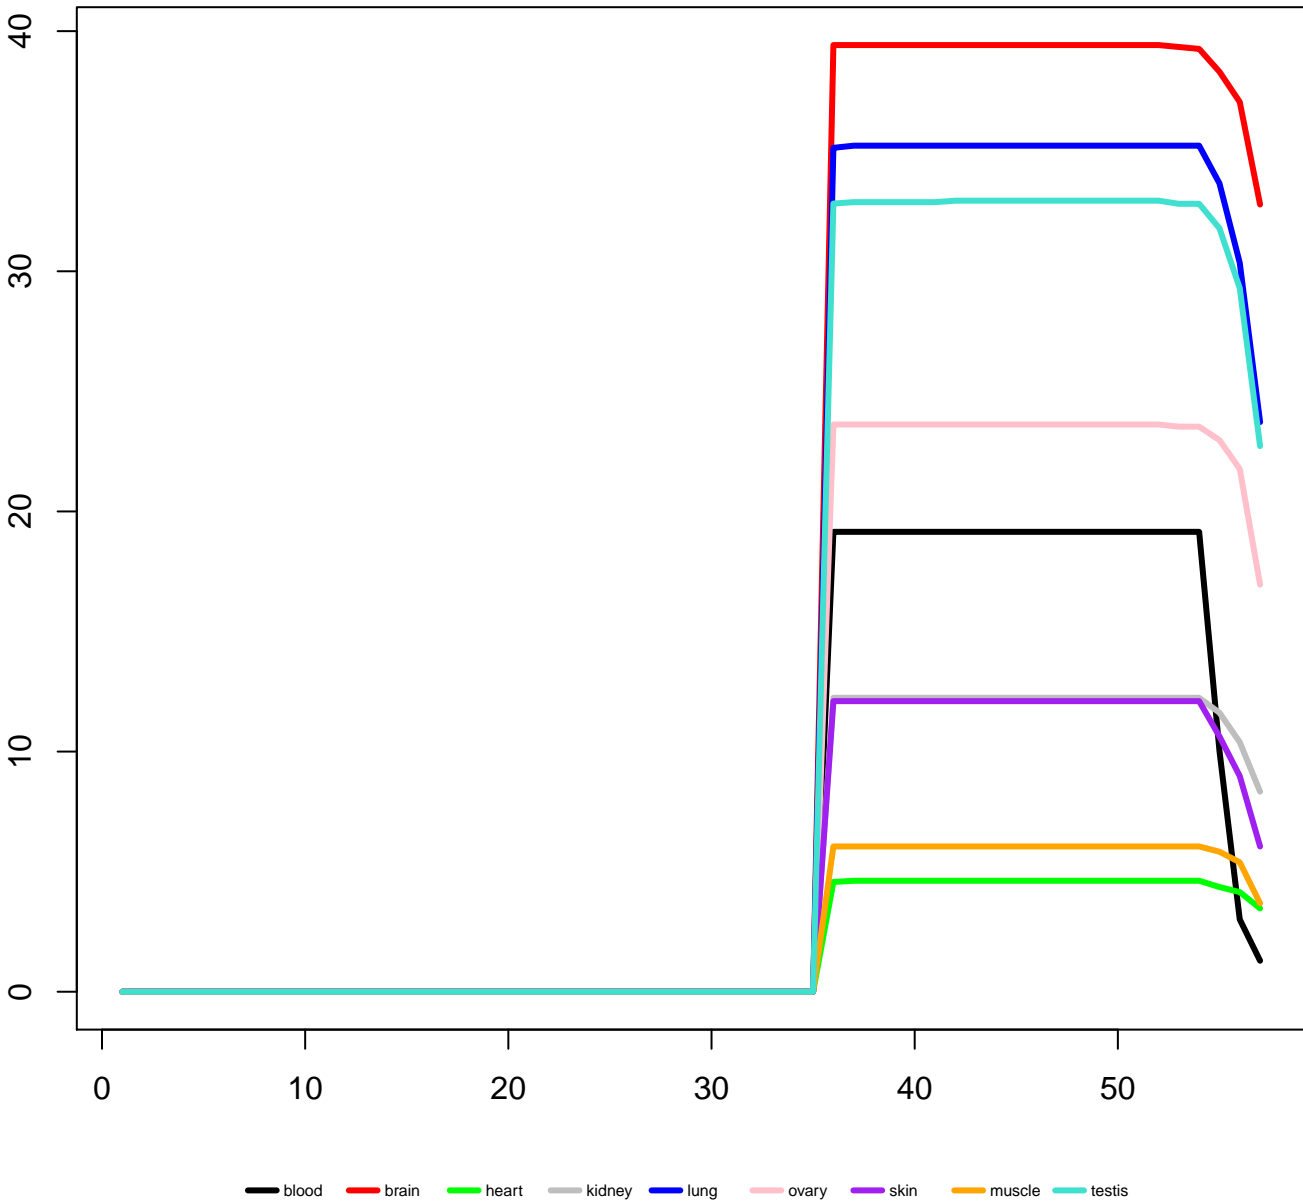

# 7\_34480300-34480366(+)\_mir-4677\_high

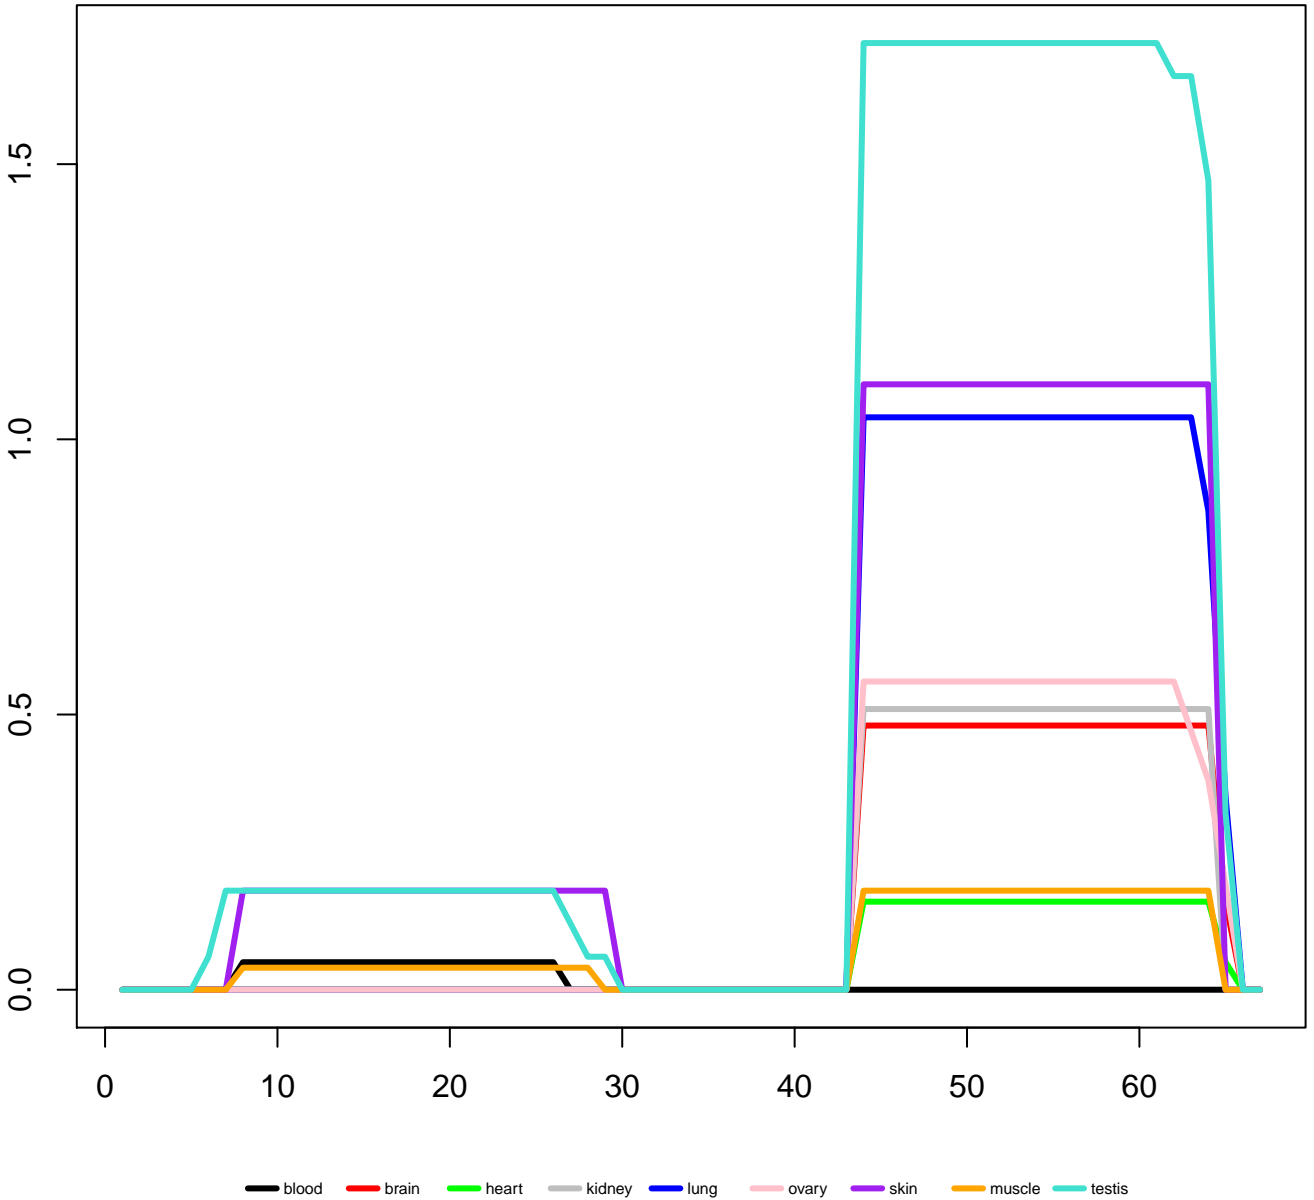

# 7\_35996308-35996410(+)\_cfa-mir-7180\_high

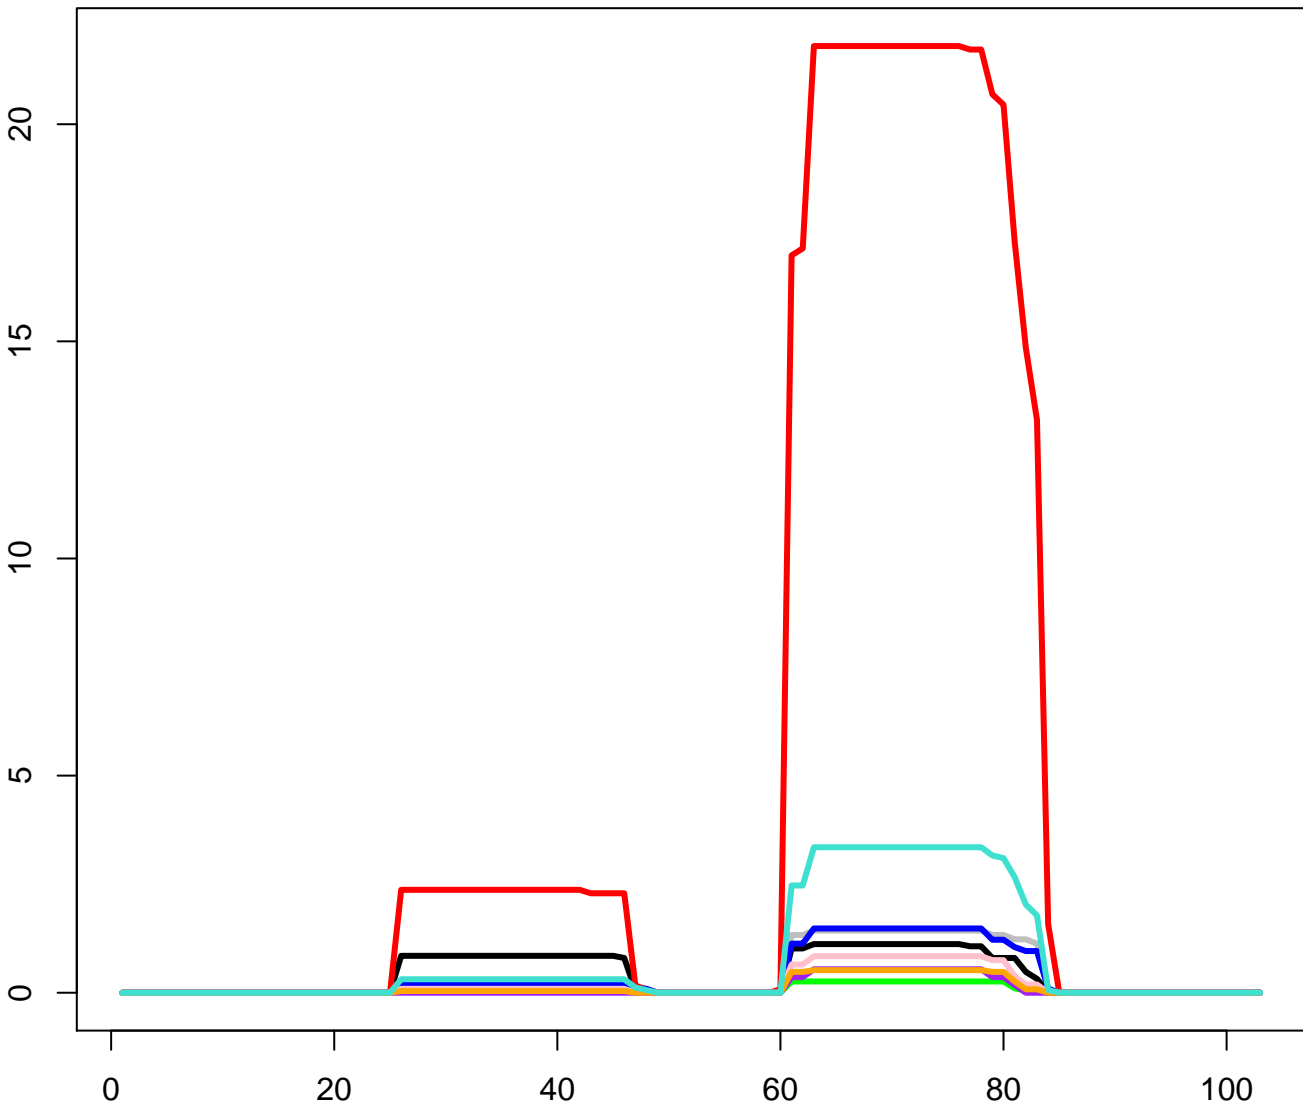

— blood — brain — heart — kidney — lung — ovary — skin — muscle — testis

# 7\_37488050-37488190(+)\_cfa-mir-8881\_low

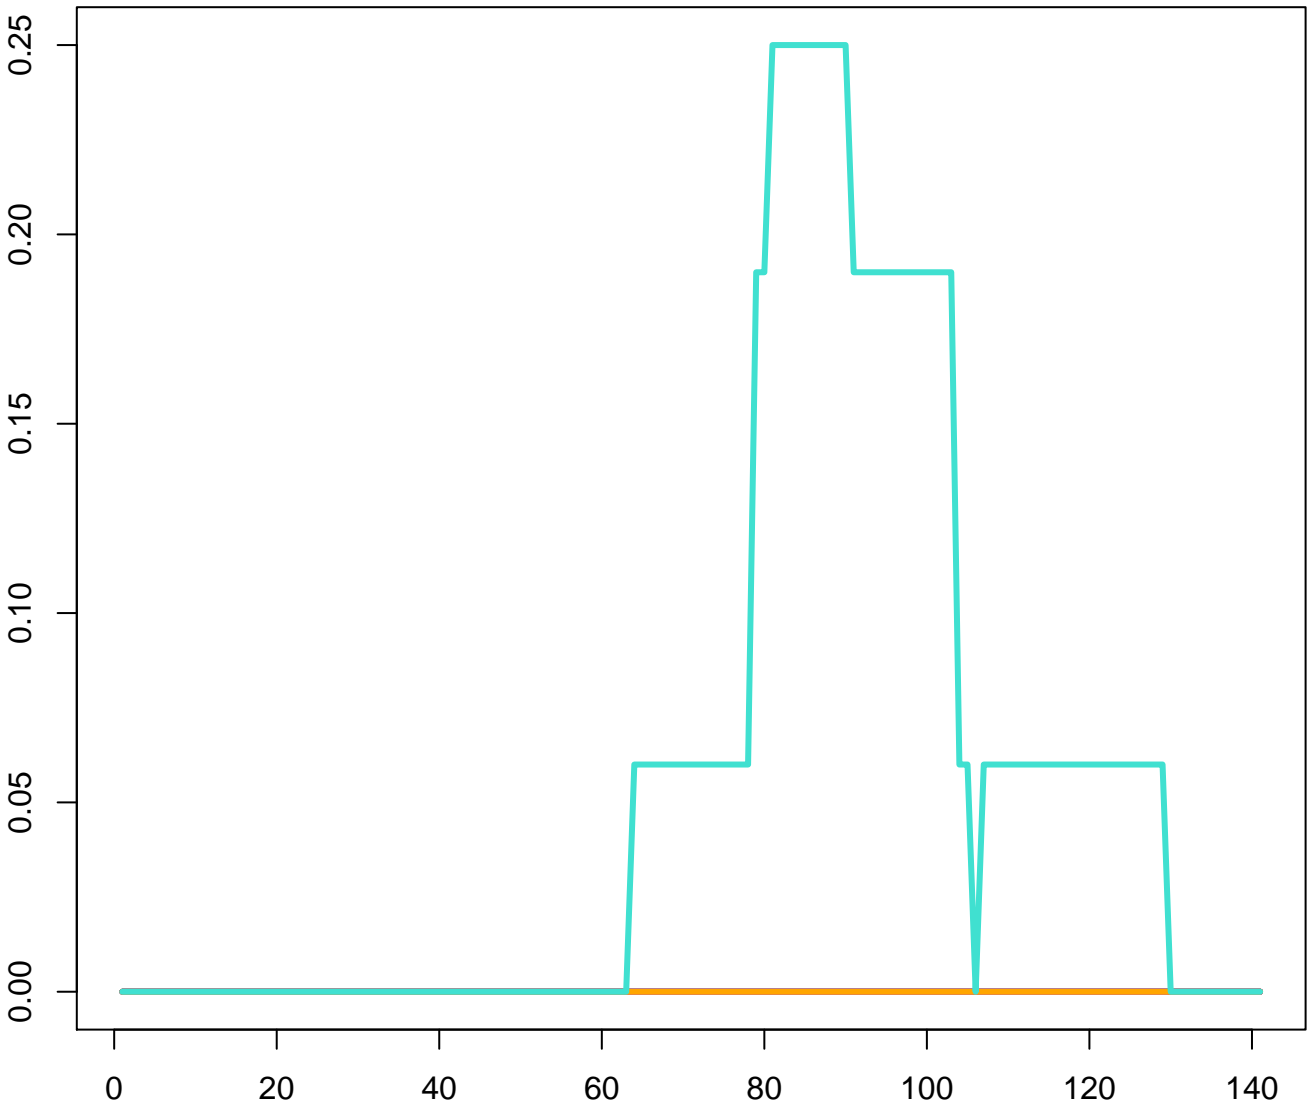

blood brain heart kidney lung ovary skin muscle testis

# 7\_41509404-41509465(+)\_cfa-mir-9-1\_high

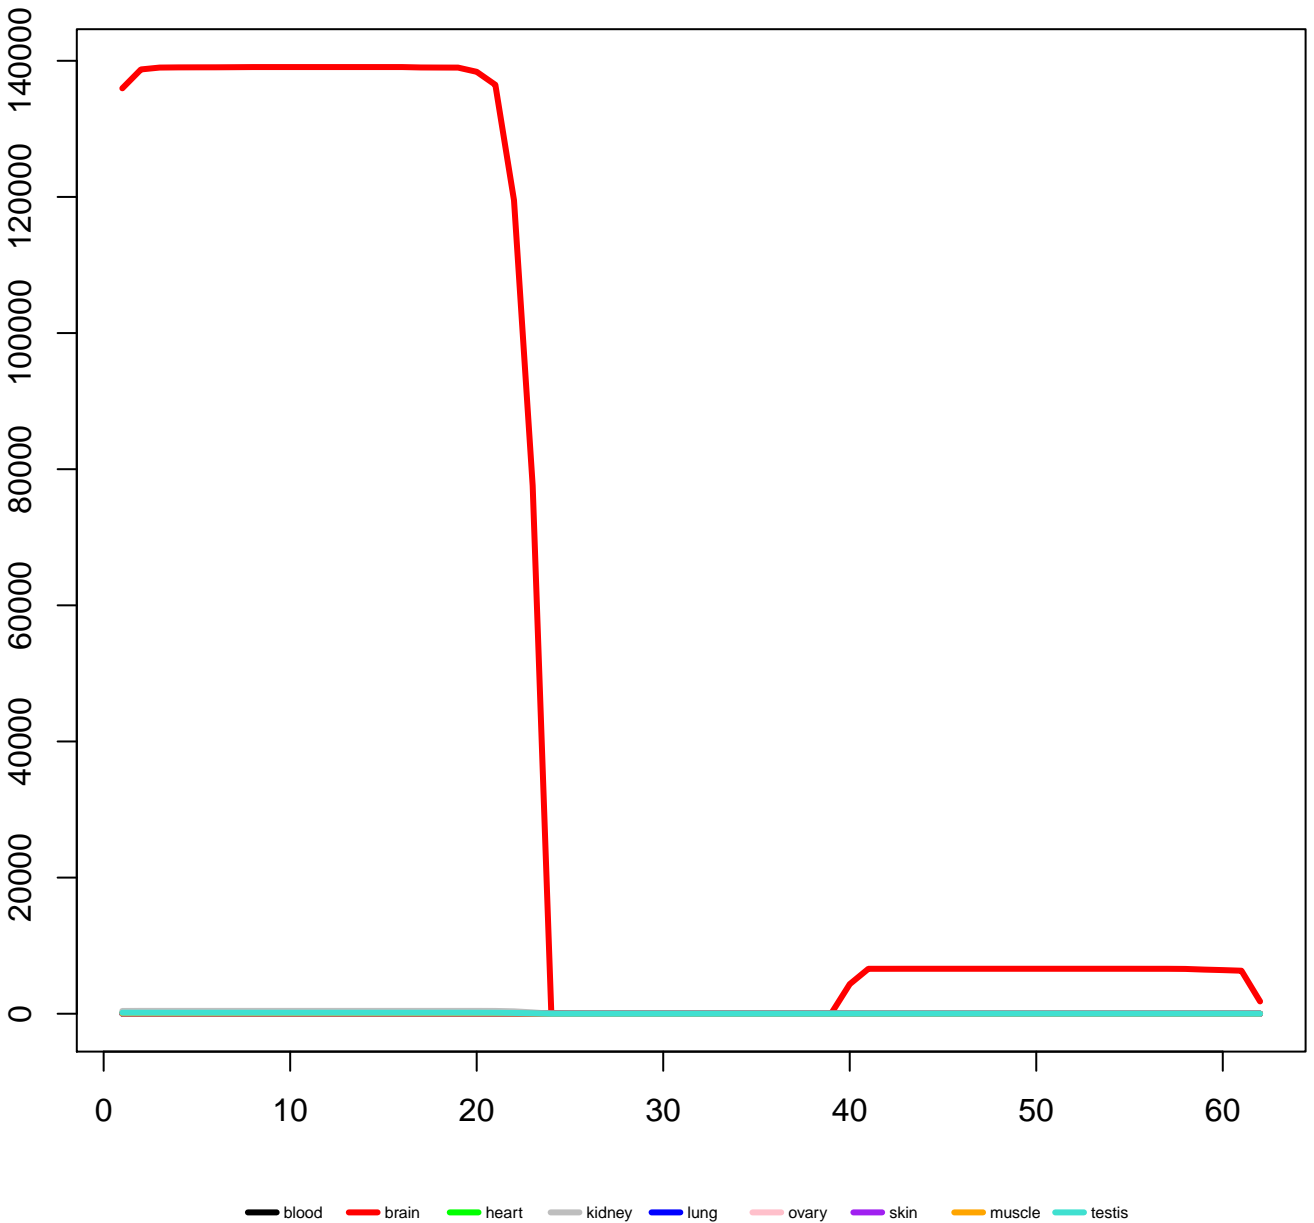

# 7\_42338480-42338542(-)\_cfa-mir-92b\_high

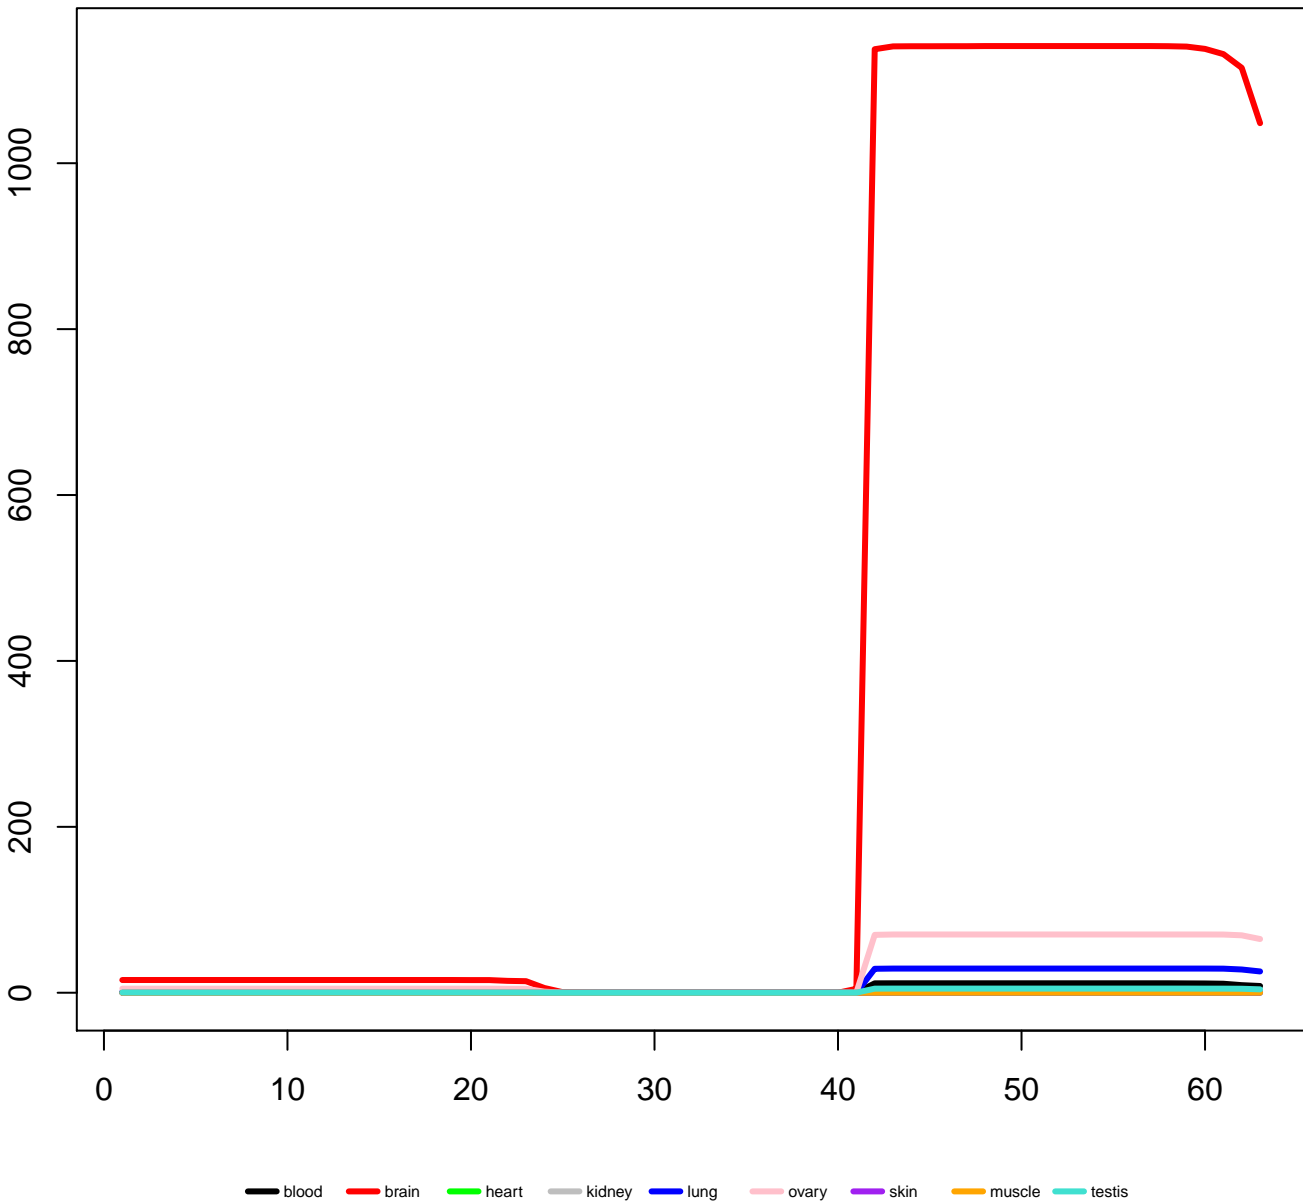

# 7\_43037530-43037607(+)\_cfa-mir-190b\_high

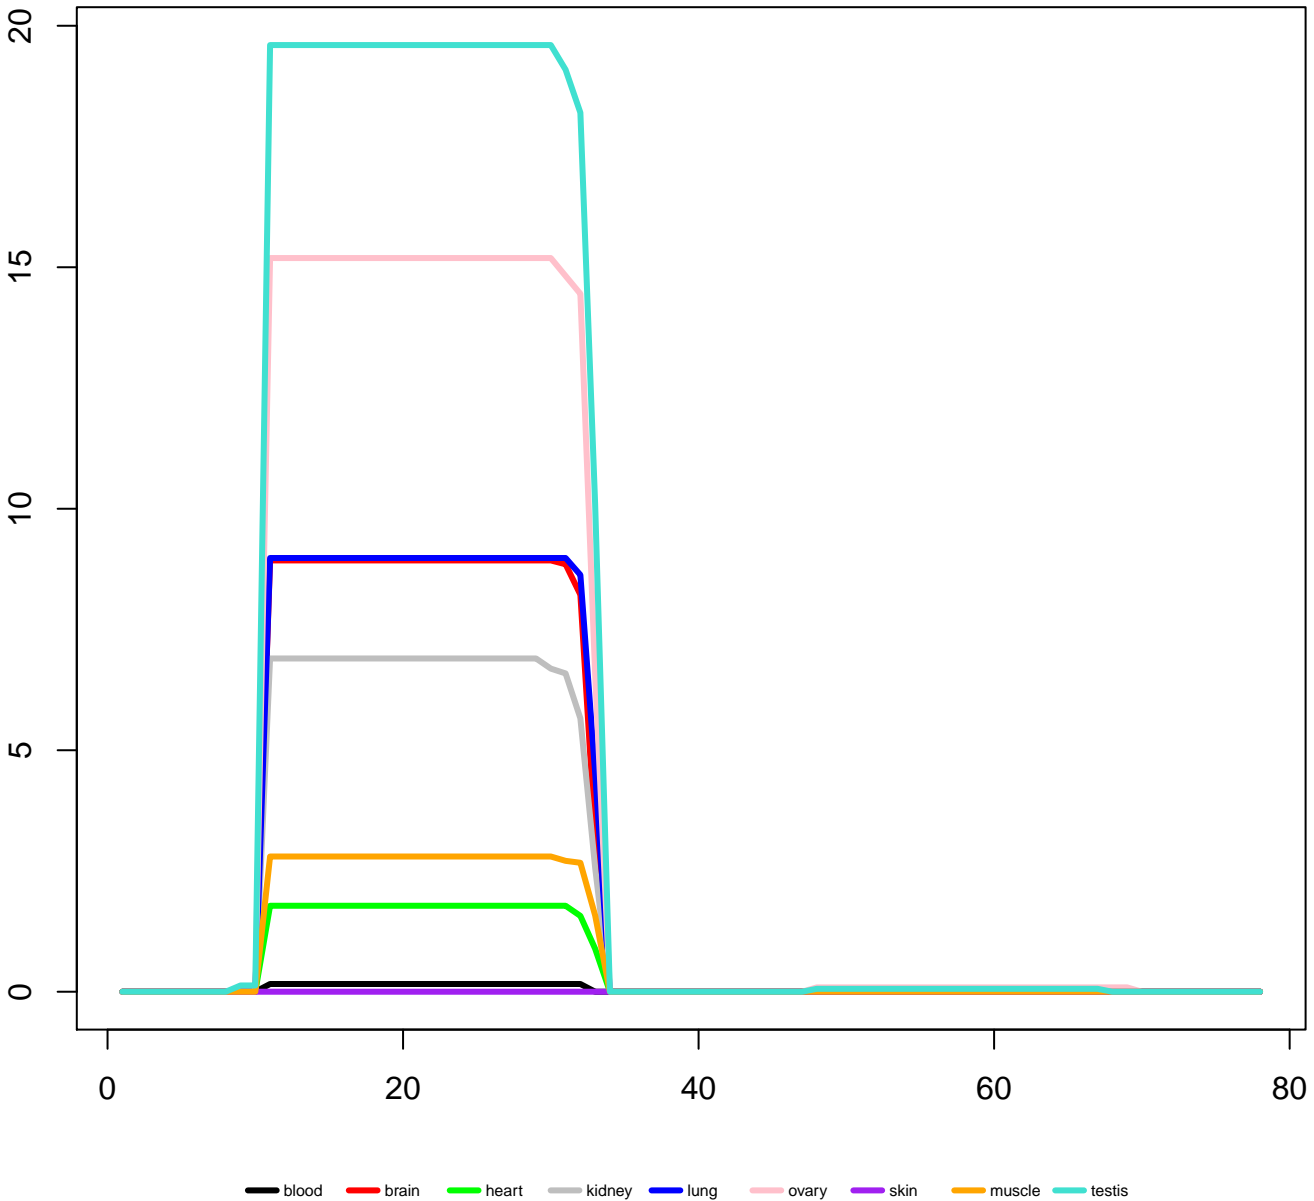





# 7\_63206303-63206375(+)\_mir-1597\_low

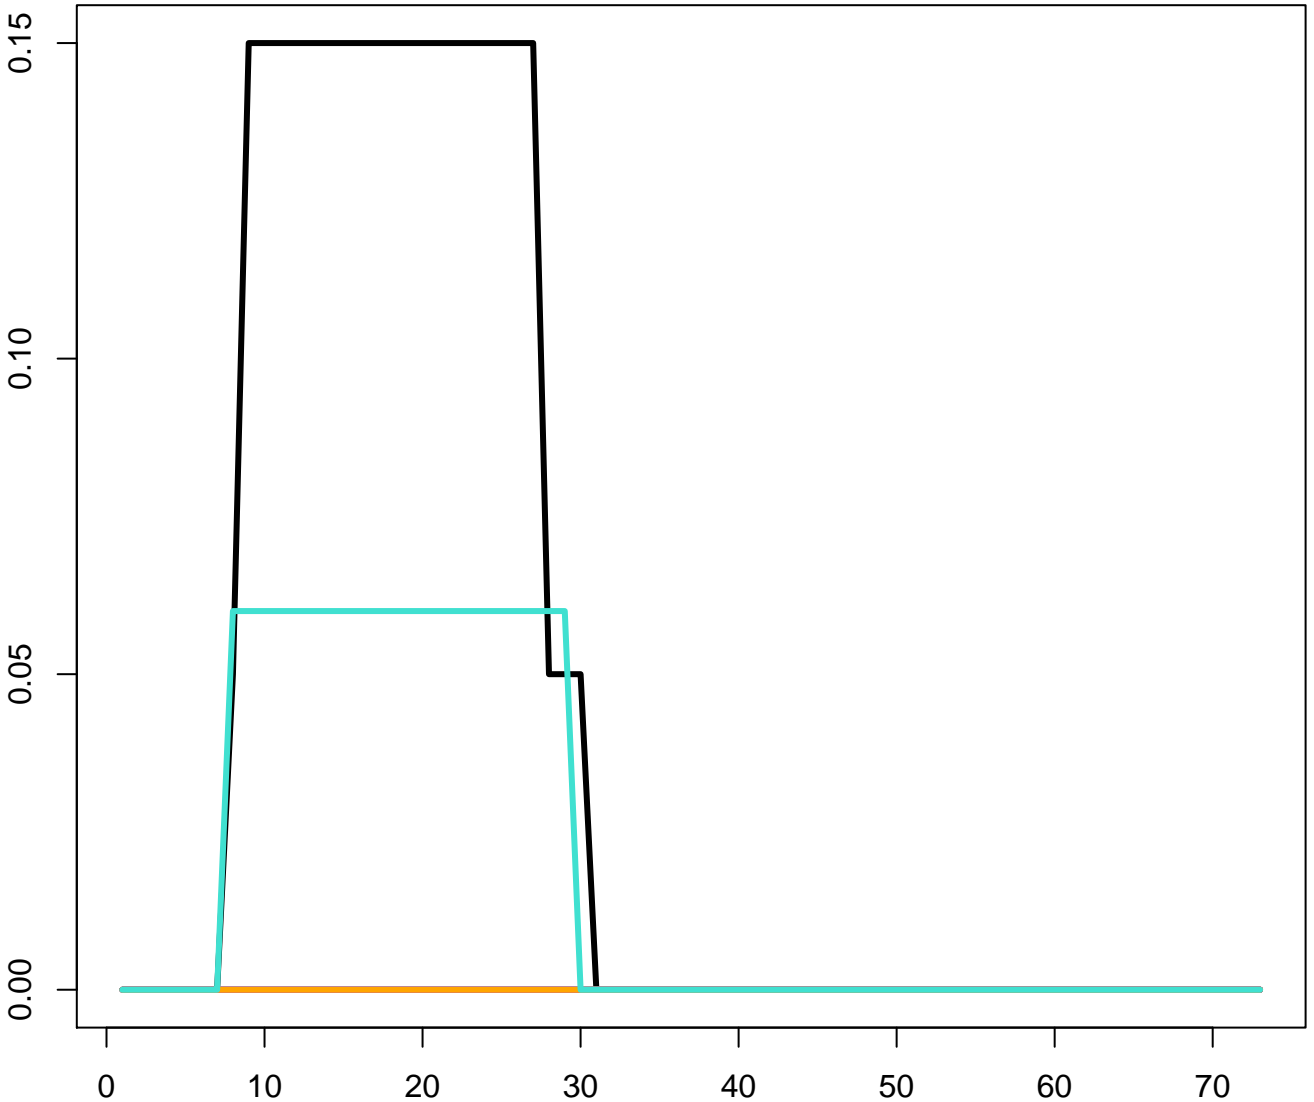

blood brain heart kidney lung ovary skin muscle testis



# 7\_66217486-66217572(+)\_cfa-mir-133a\_high

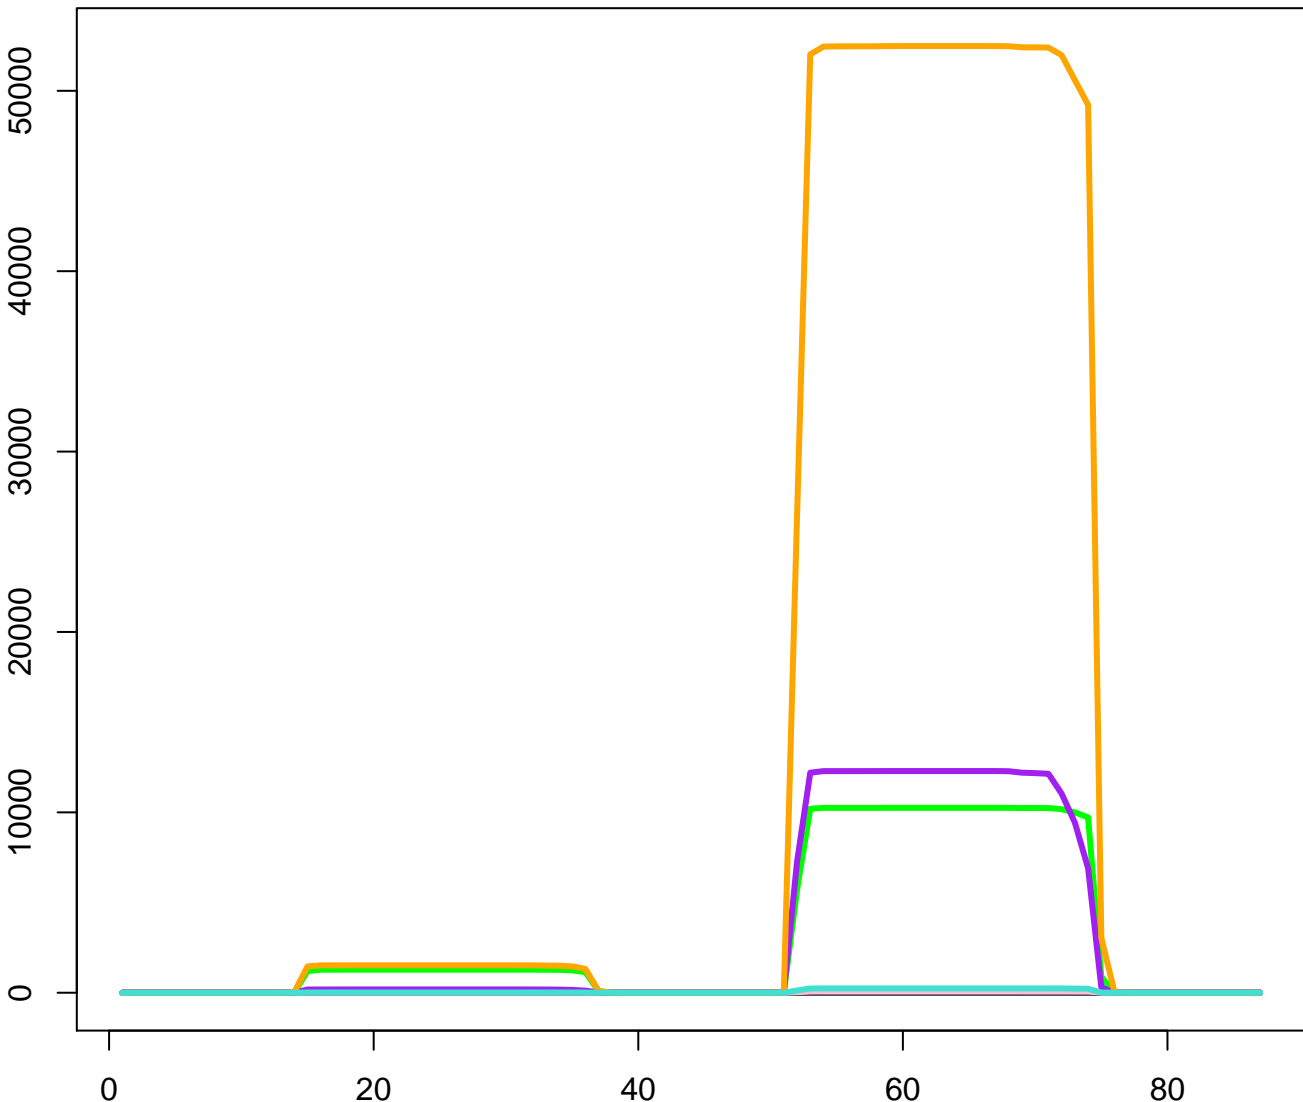

— blood — brain — heart — kidney — lung — ovary — skin — muscle — testis



# 7\_80973870-80974011(-)\_cfa-mir-8865\_low

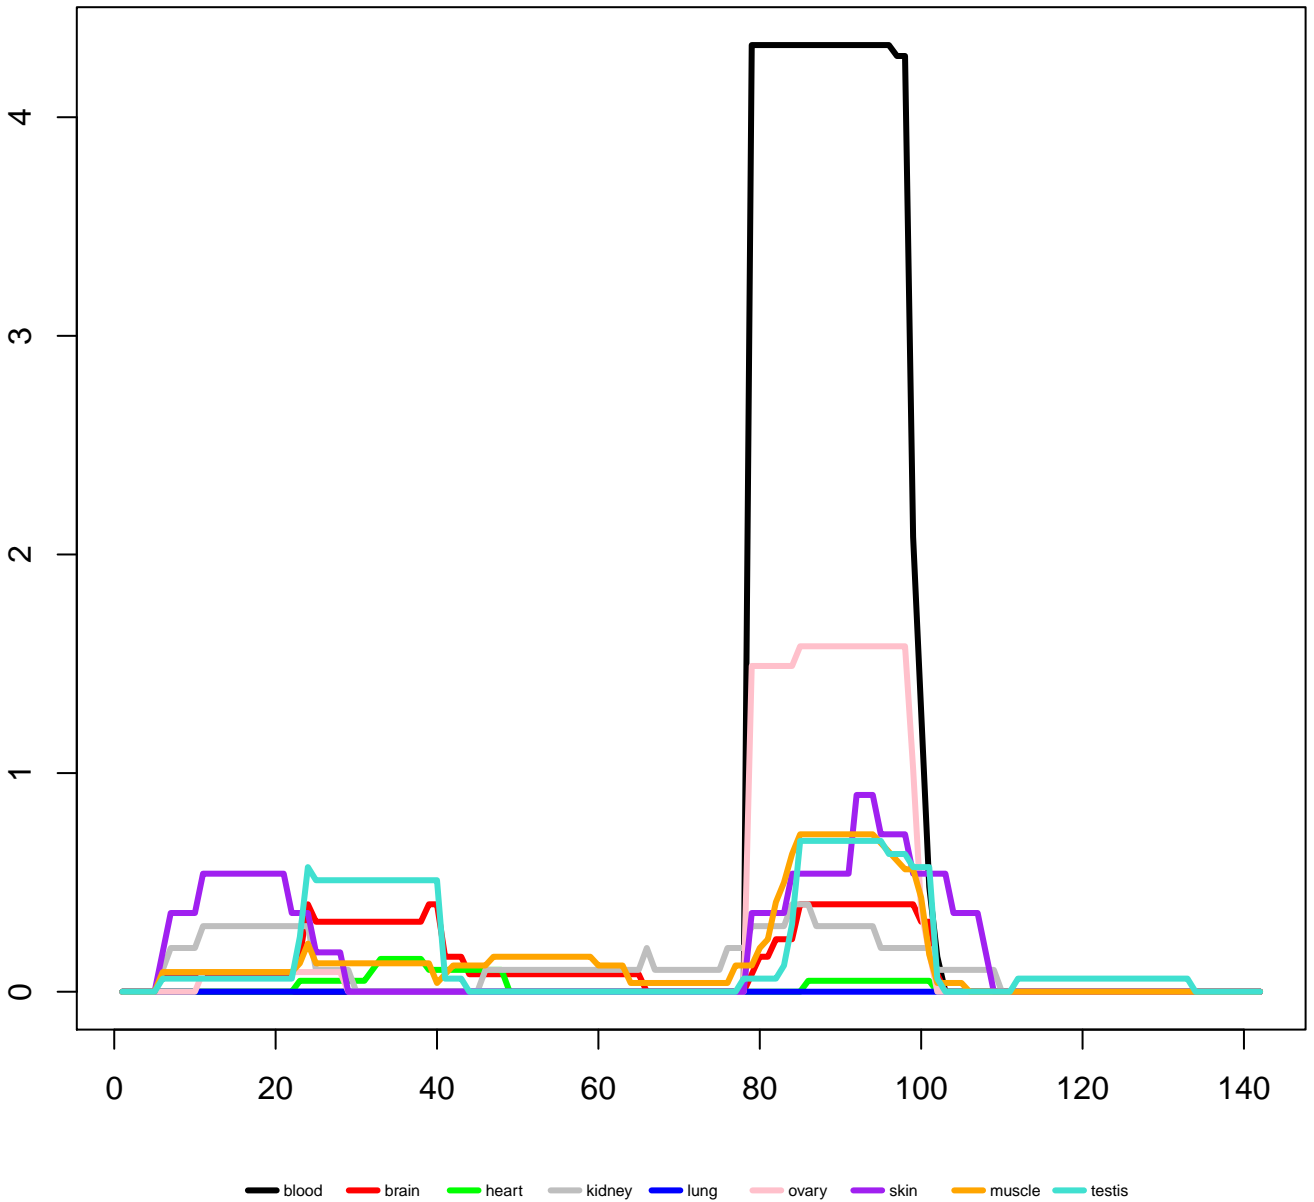

# 8\_3636919-3636987(-)\_cfa-mir-208a\_high

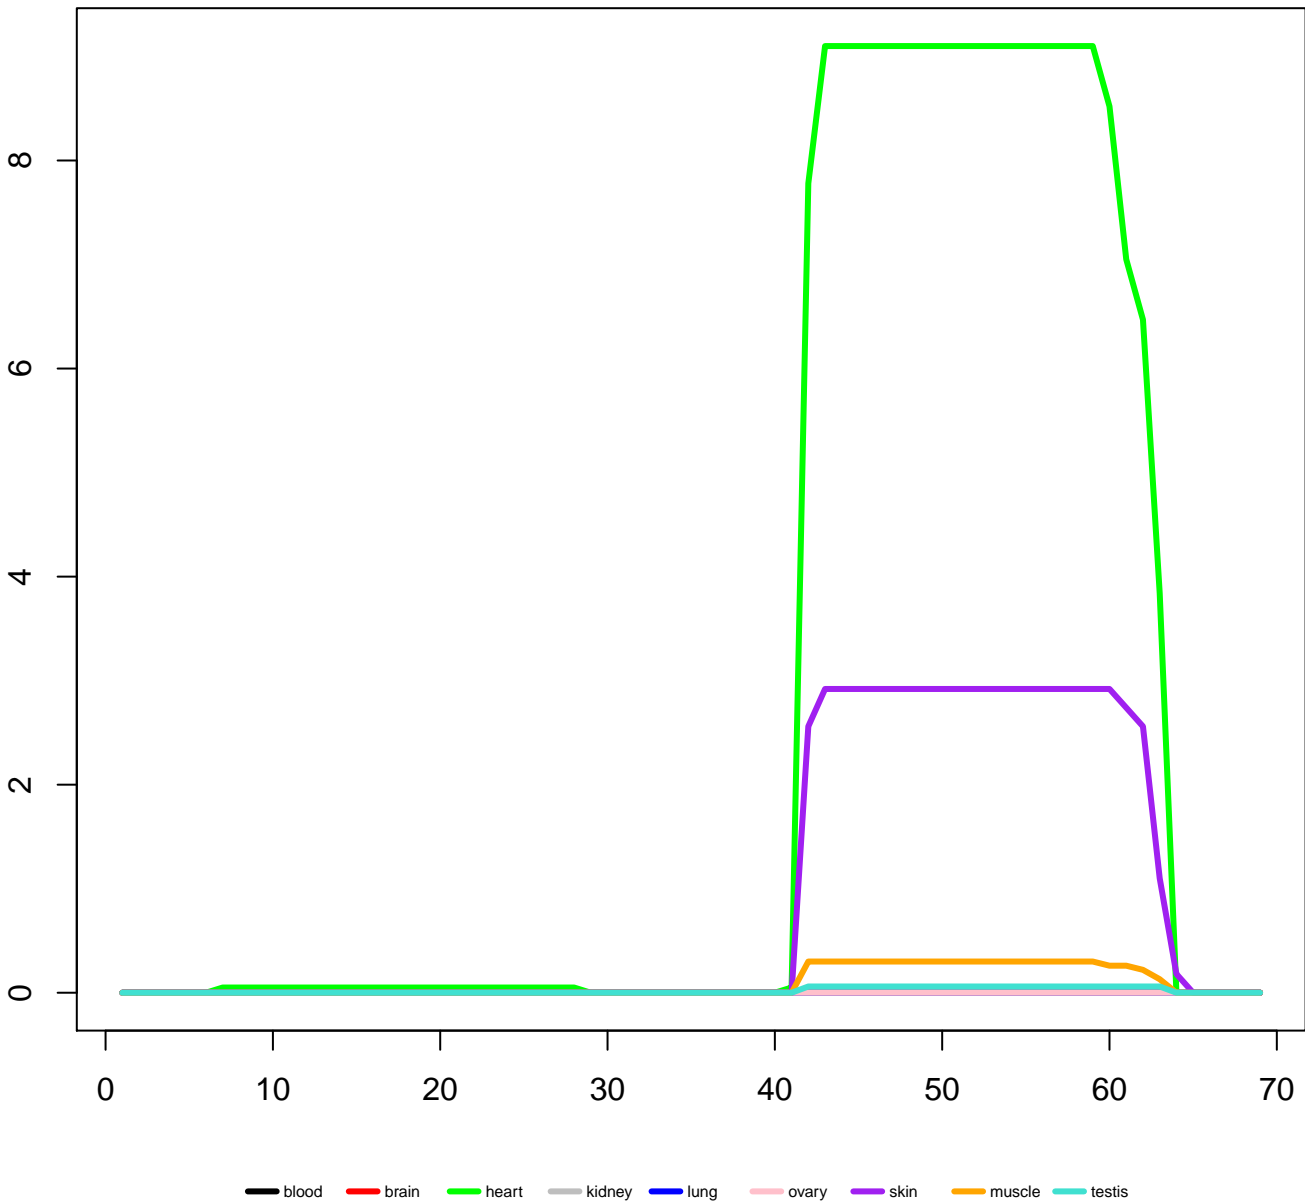



# 8\_26223920-26224014(+)\_mir-1285\_low

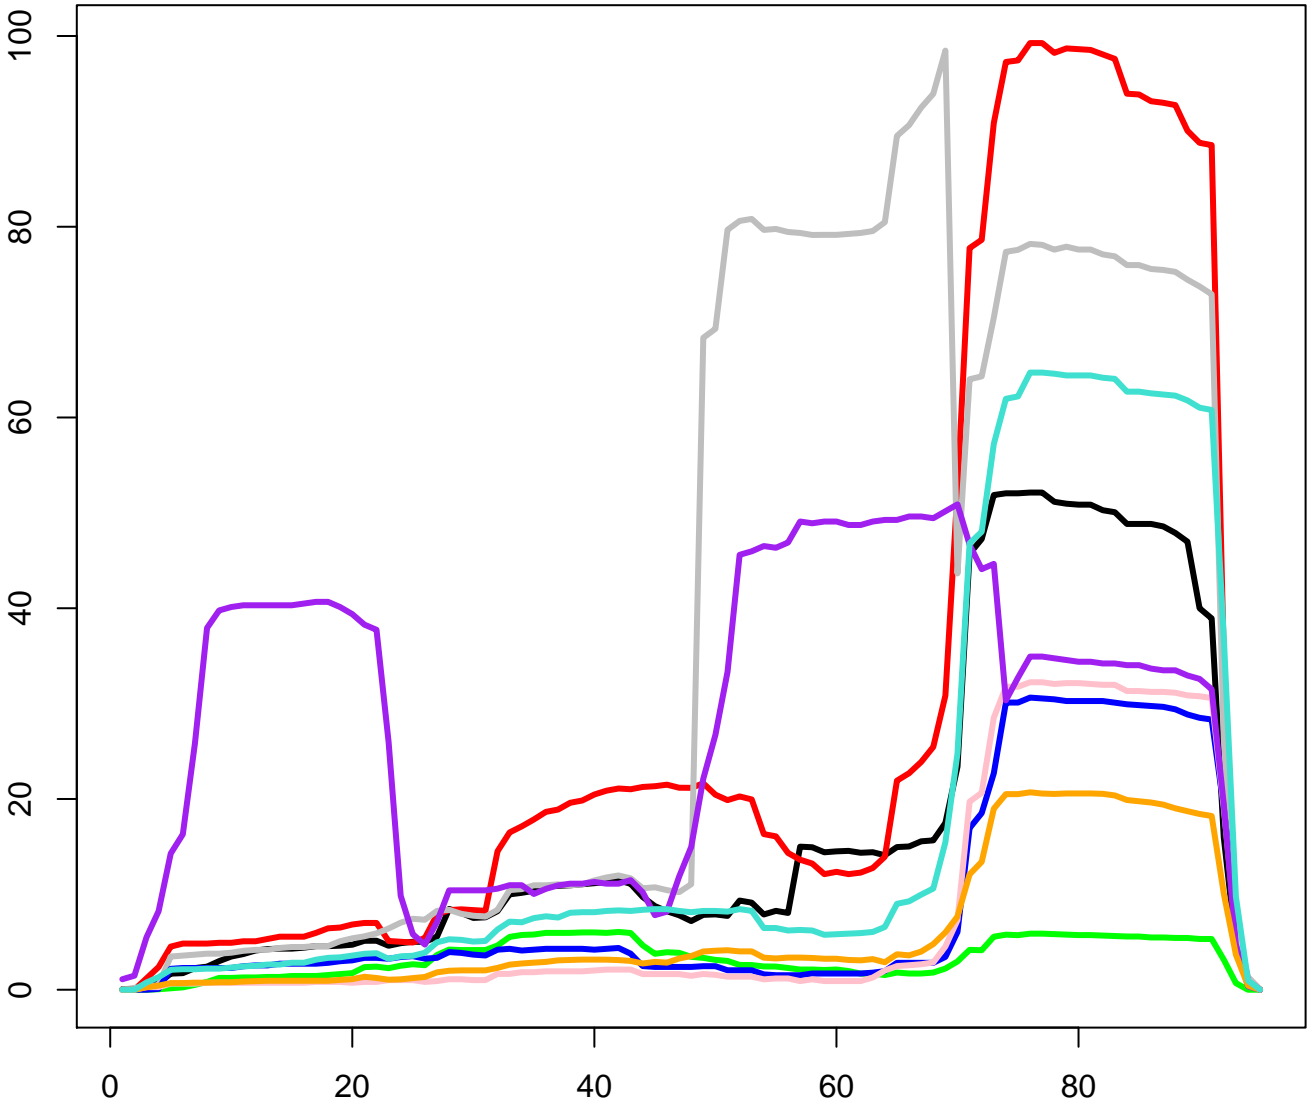

— blood — brain — heart — kidney — lung — ovary — skin — muscle — testis





# 8\_26412225-26412319(-)\_mir-1285\_low

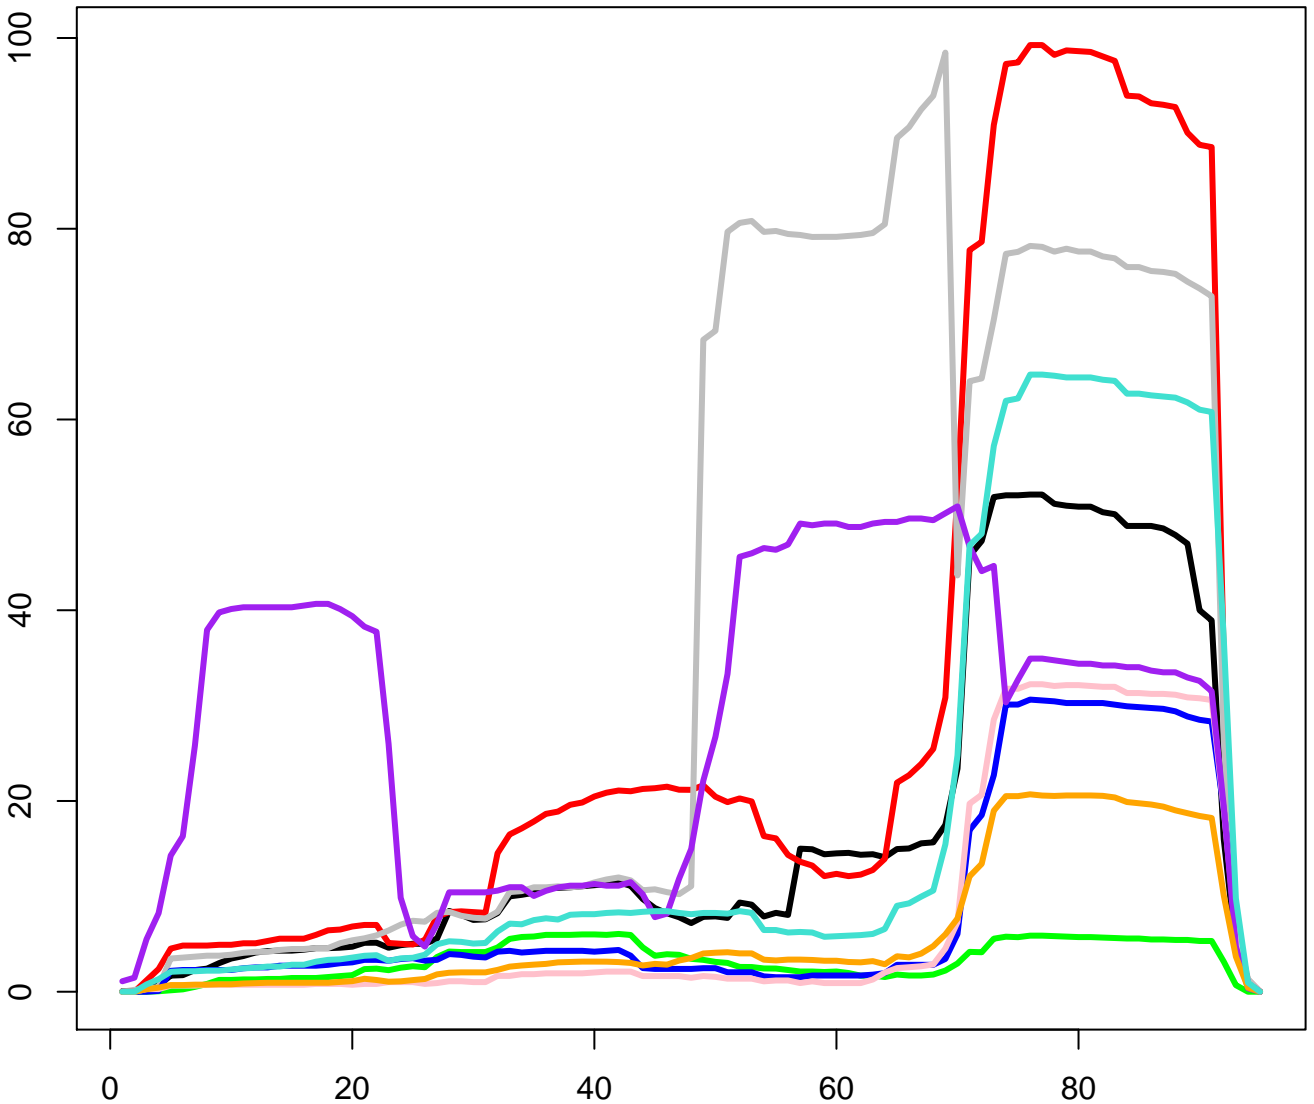

— blood — brain — heart — kidney — lung — ovary — skin — muscle — testis

# 8\_26422918-26423012(-)\_mir-1285\_low



— blood — brain — heart — kidney — lung — ovary — skin — muscle — testis

# 8\_32848208-32848352(+)\_cfa-mir-8883\_low

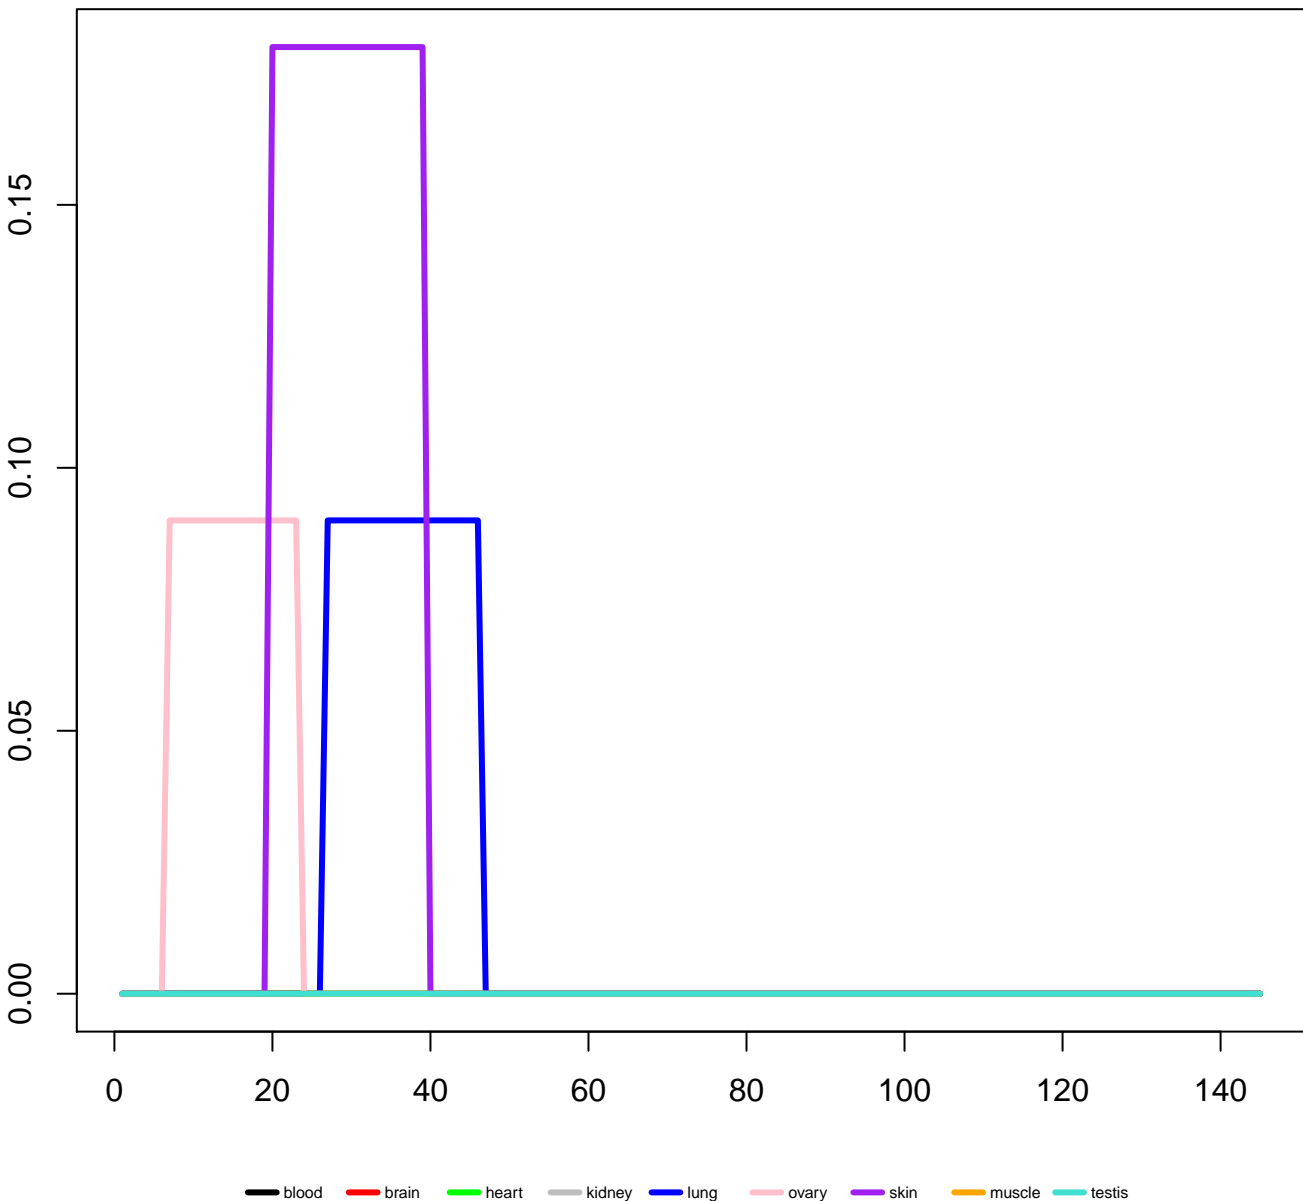

# 8\_53823682-53823810(-)\_cfa-mir-8884\_high

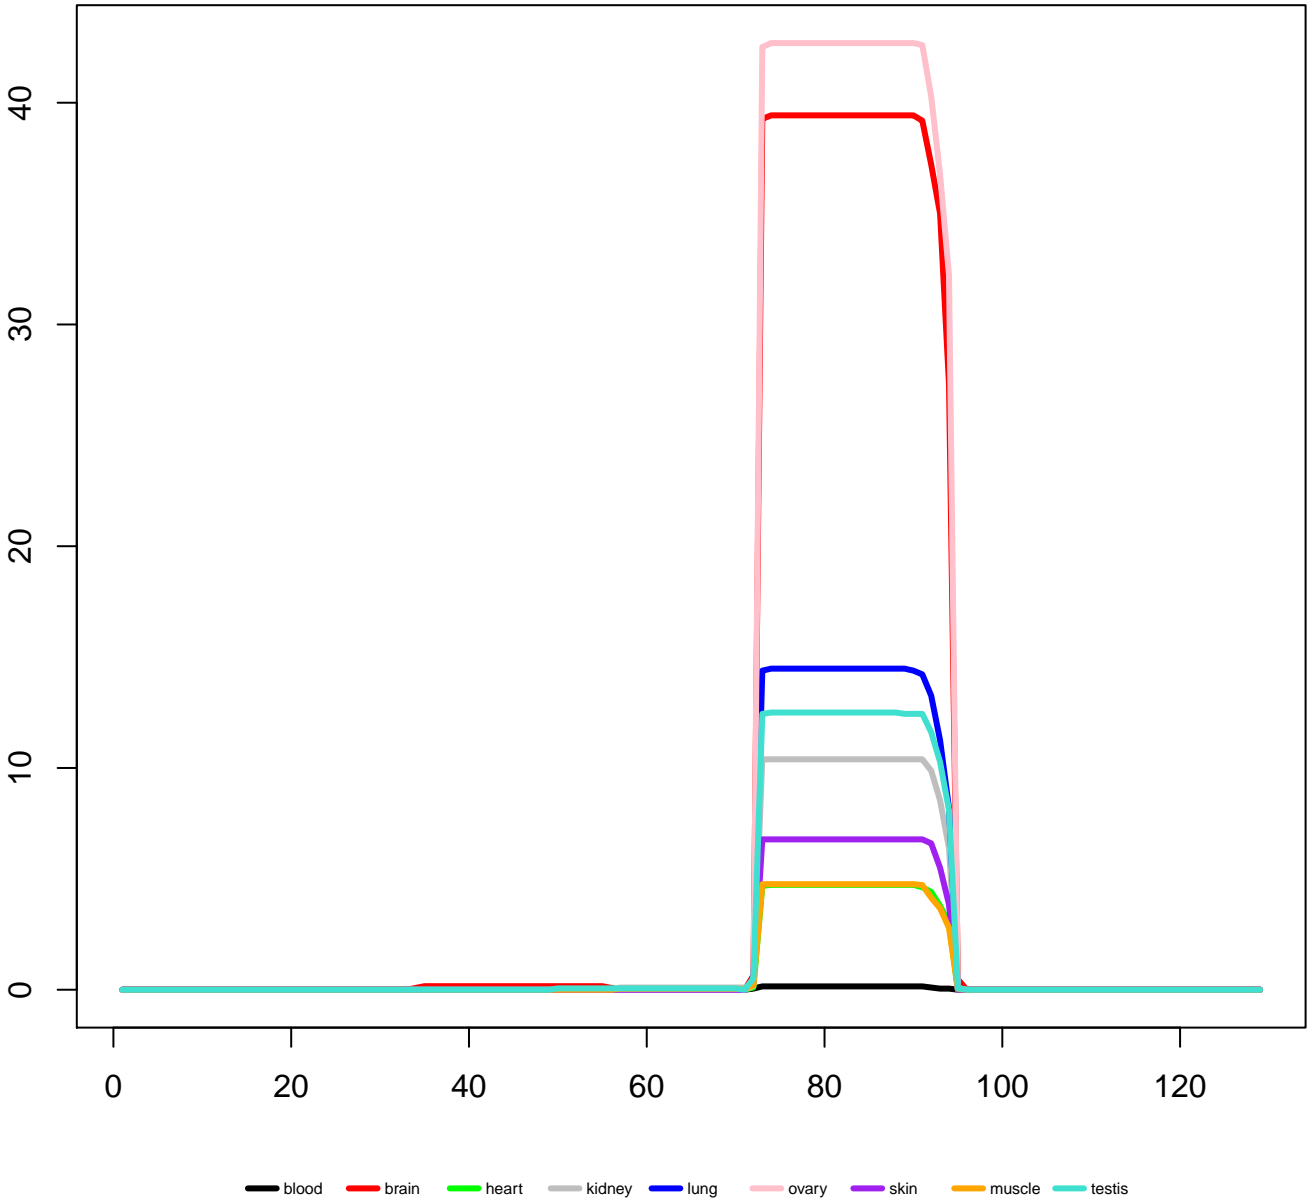

# 8\_68424656-68424718(+)\_cfa-mir-342\_high

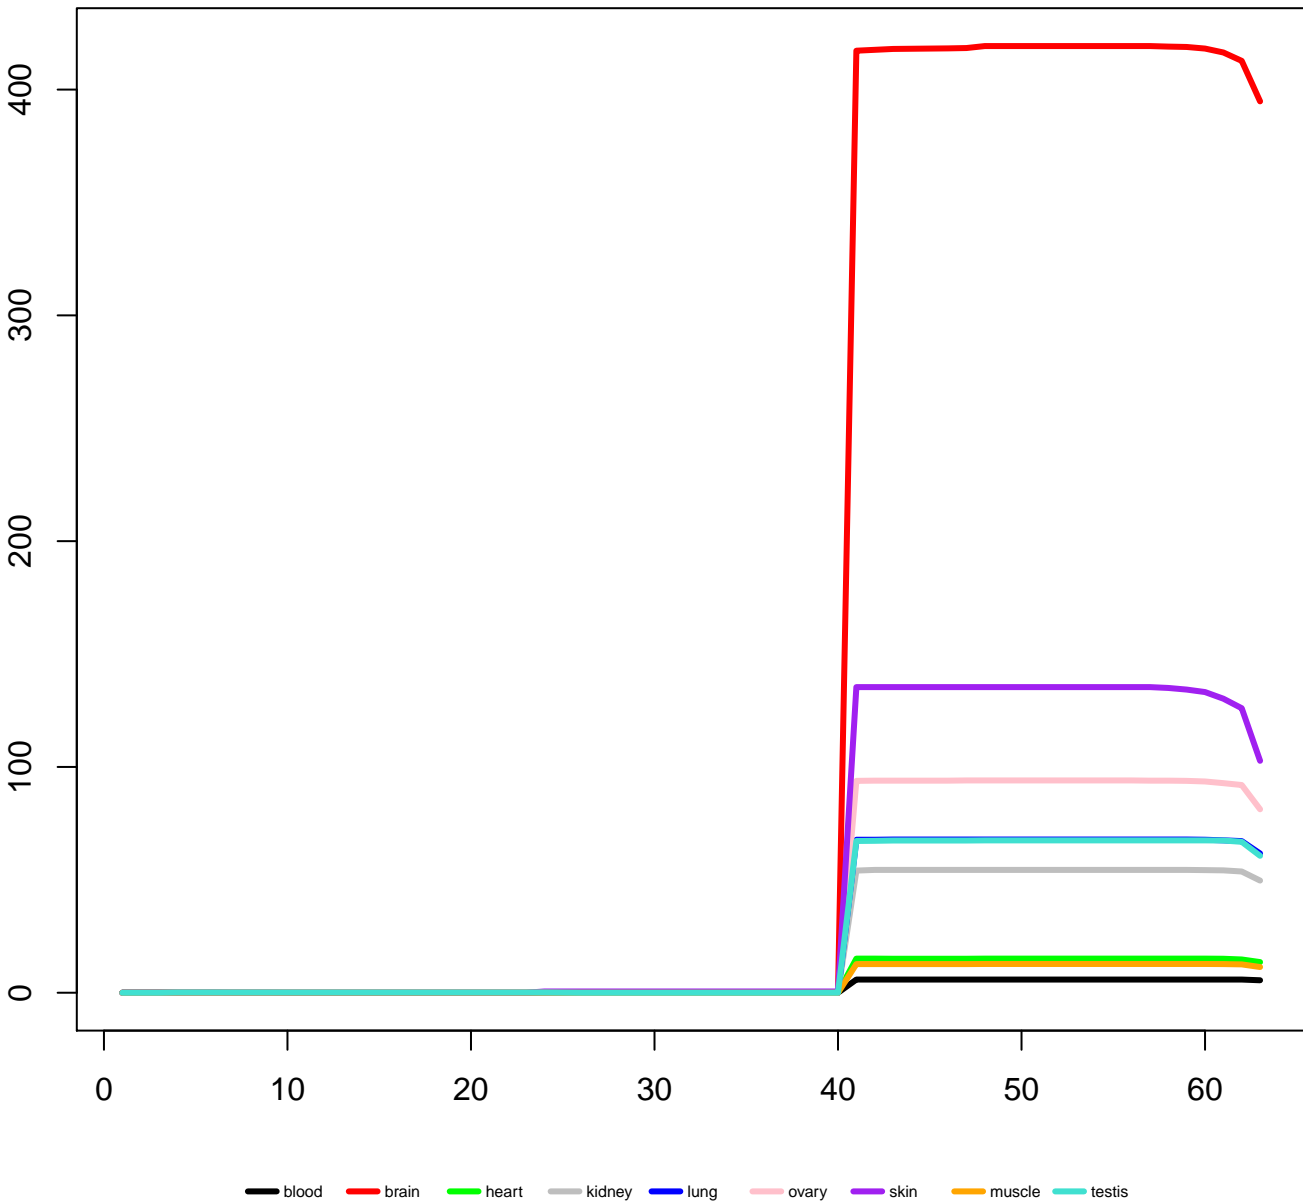



# 8\_69094352-69094412(+)\_cfa-mir-493\_high

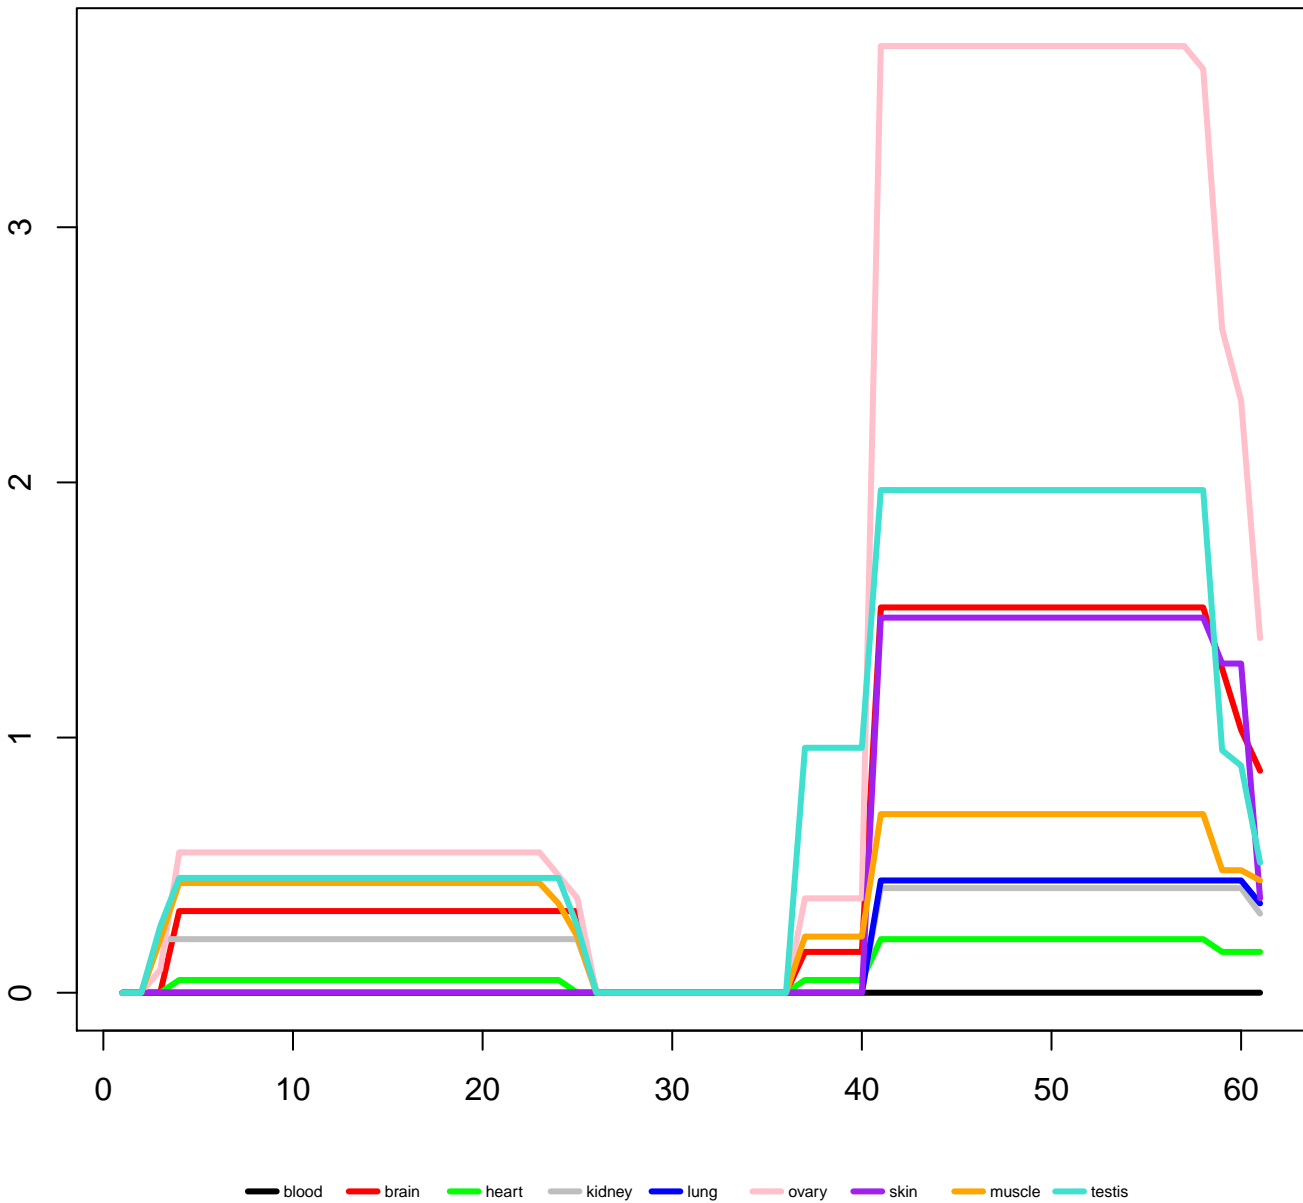



# 8\_69097904-69097971(+)\_cfa-mir-665\_low





# 8\_69103838-69103911(+)\_cfa-mir-433\_high

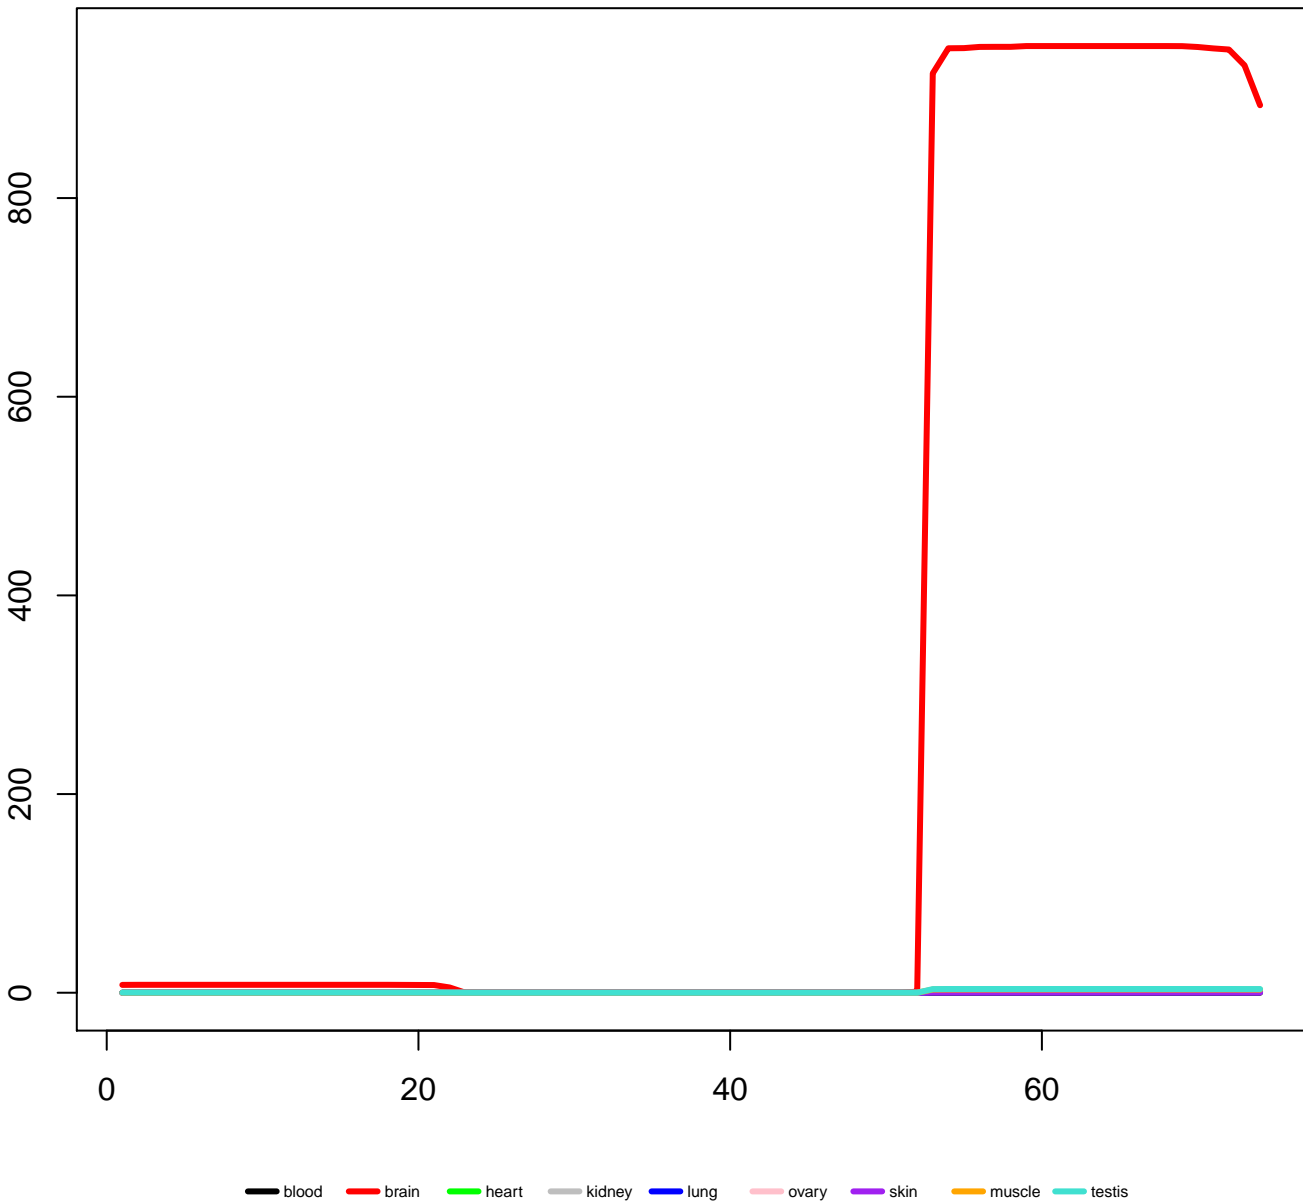

# 8\_69104938-69104997(+)\_cfa-mir-127\_high

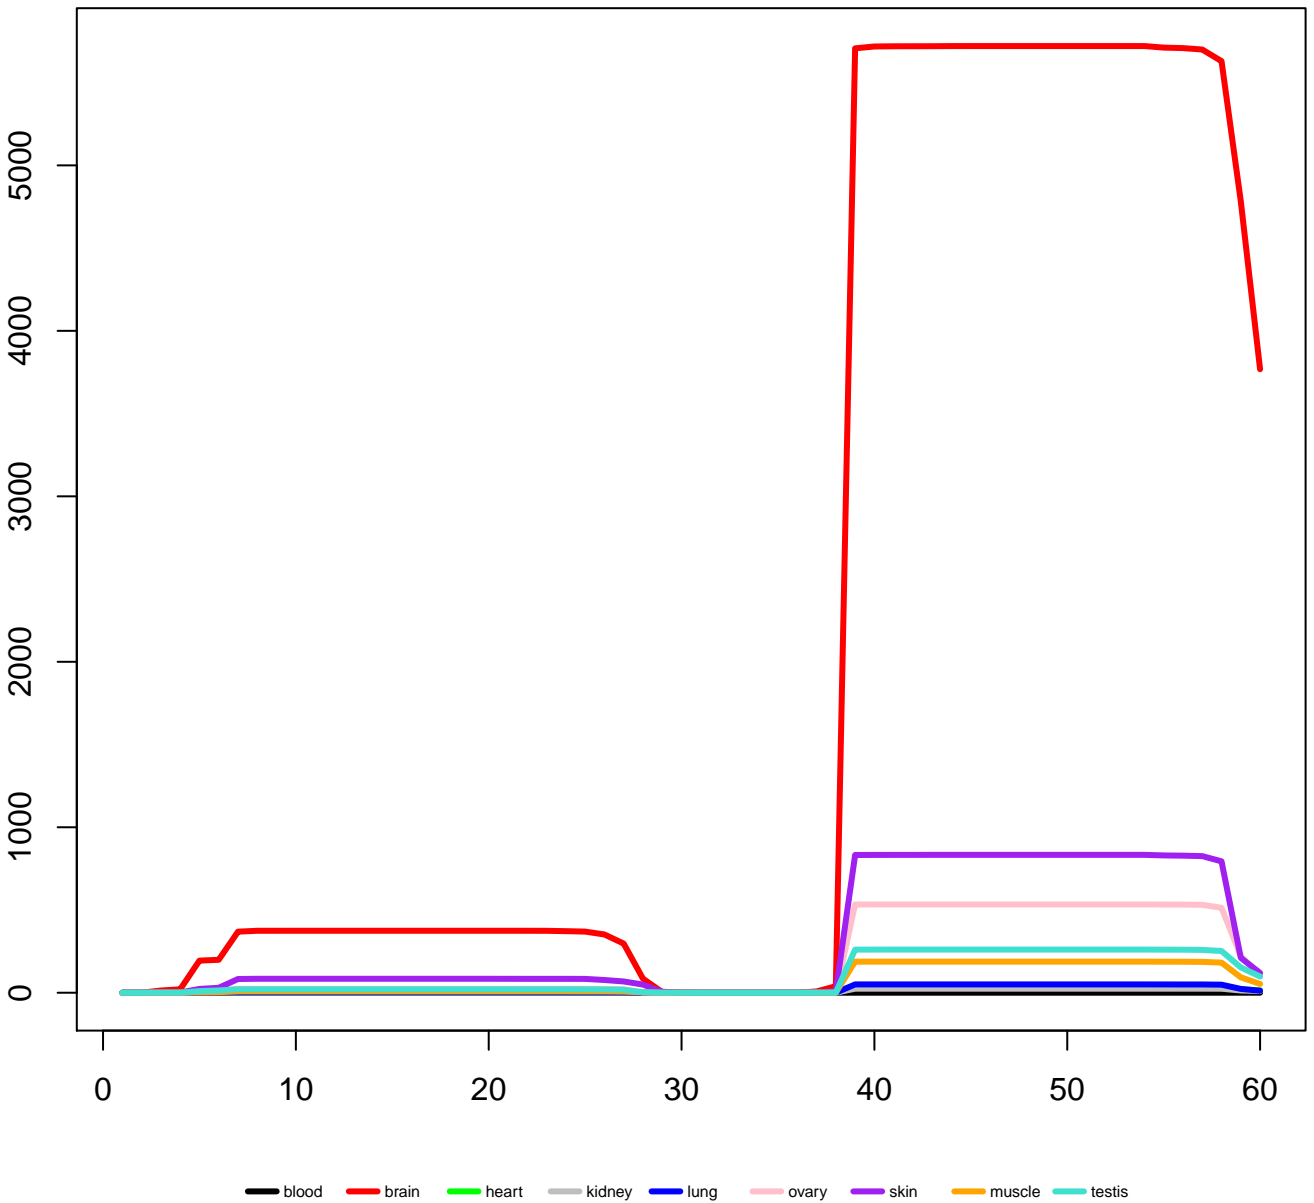

# 8\_69106415-69106501(+)\_cfa-mir-432\_high

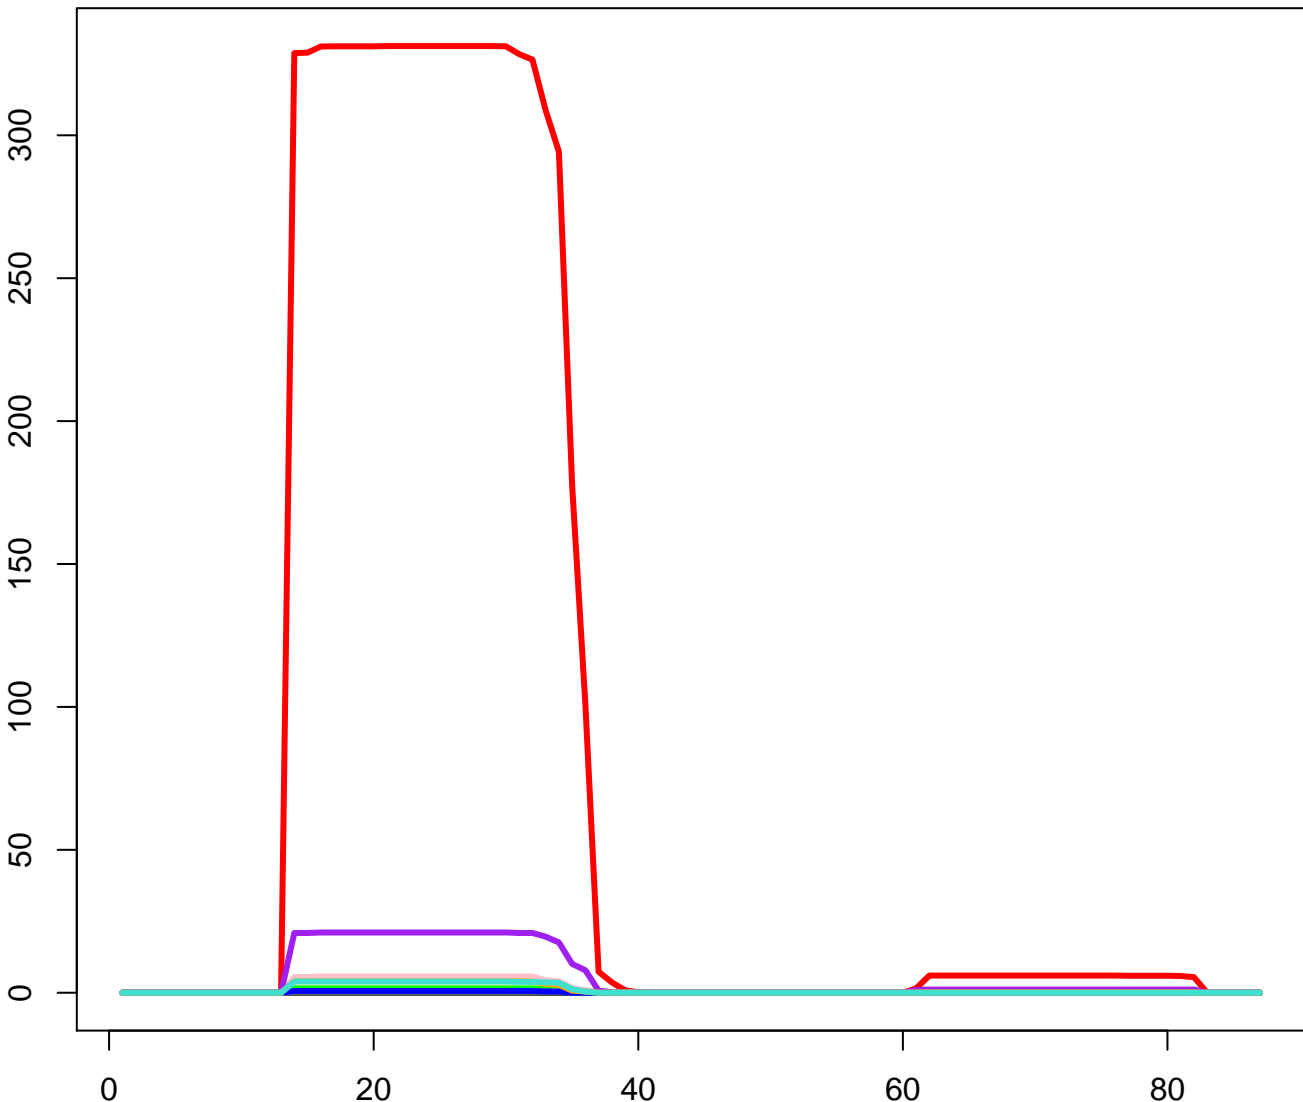

— blood — brain — heart — kidney — lung — ovary — skin — muscle — testis

# 8\_69106615-69106670(+)\_cfa-mir-136\_high

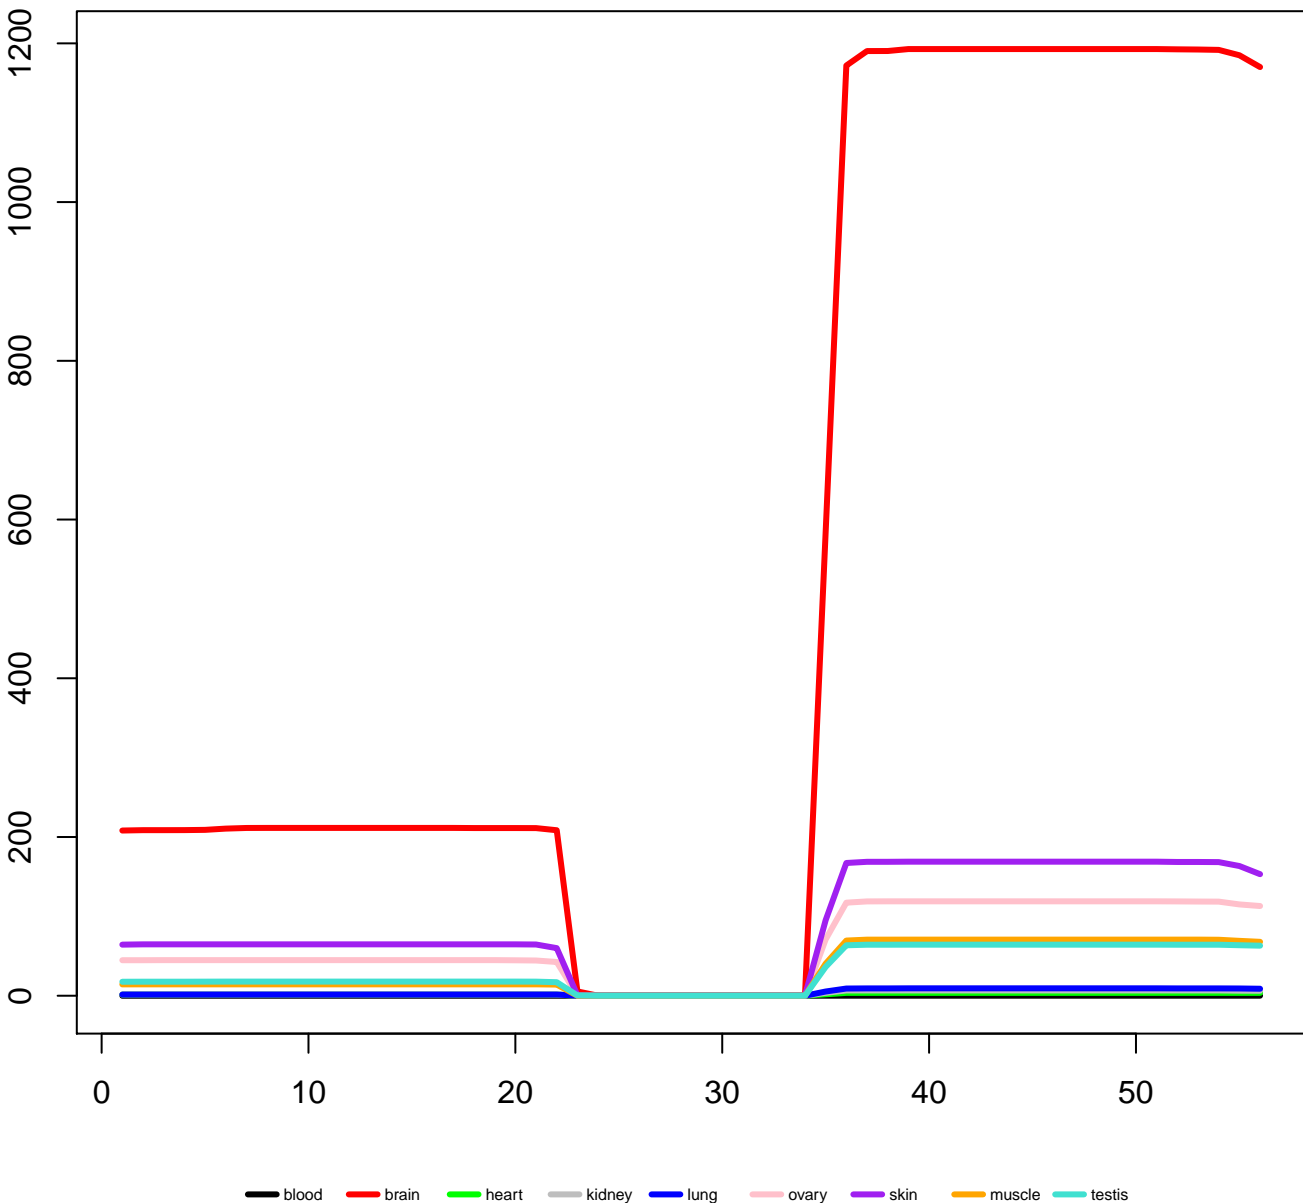

# 8\_69132786-69132864(+)\_cfa-mir-370\_high

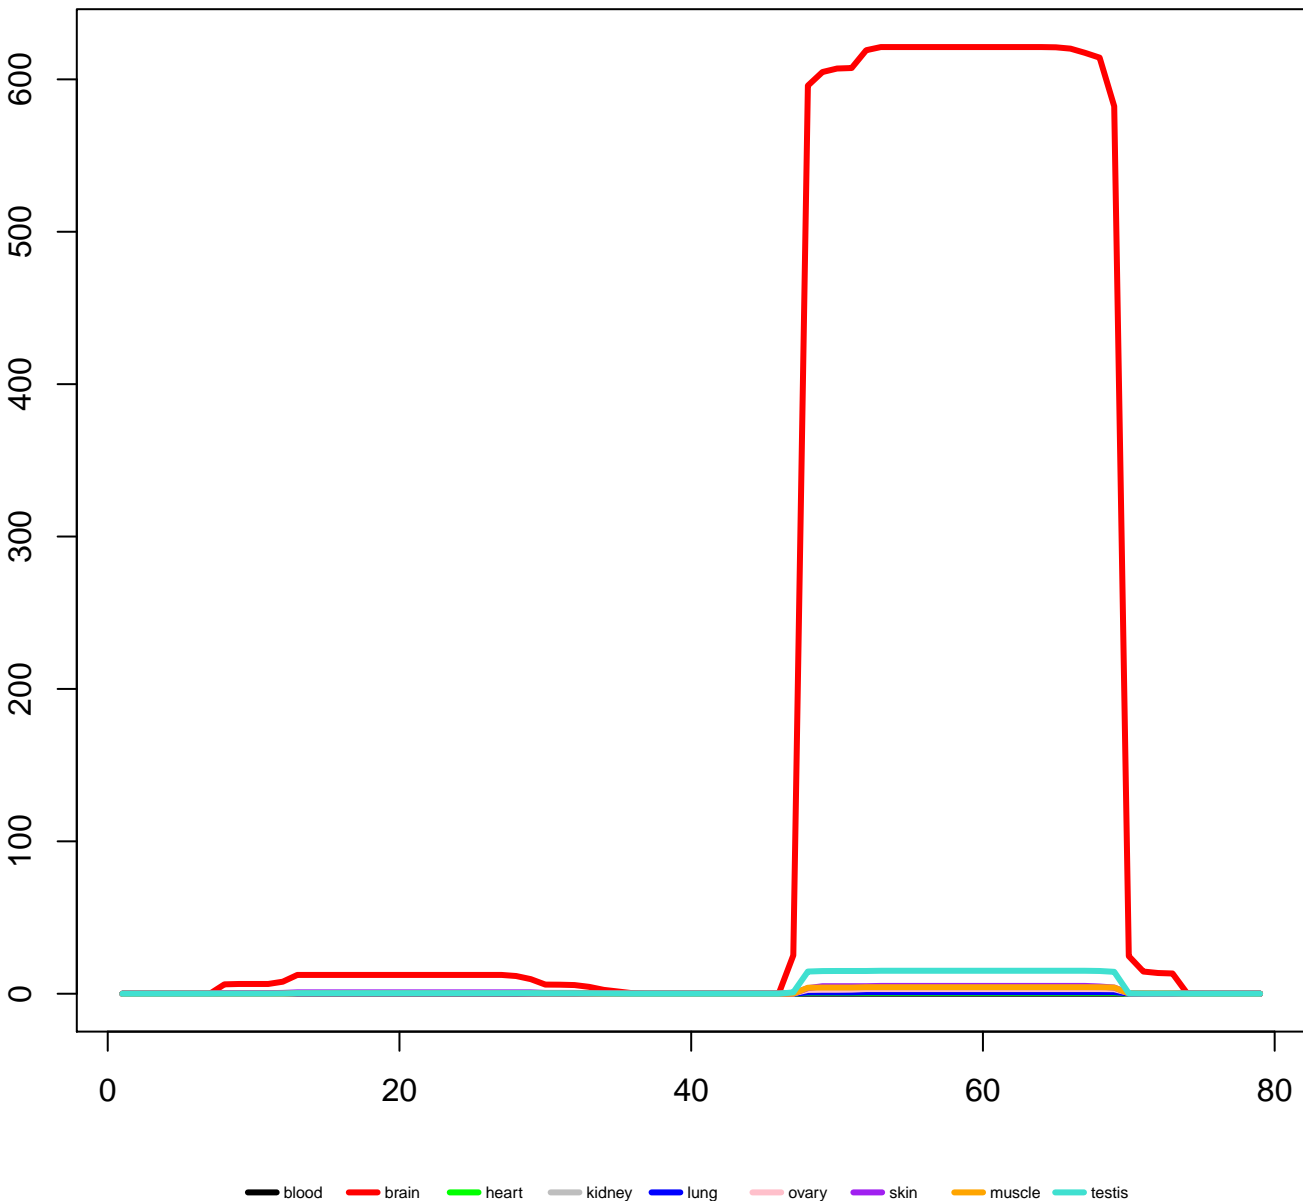

# 8\_69253808-69253866(+)\_cfa-mir-379\_high

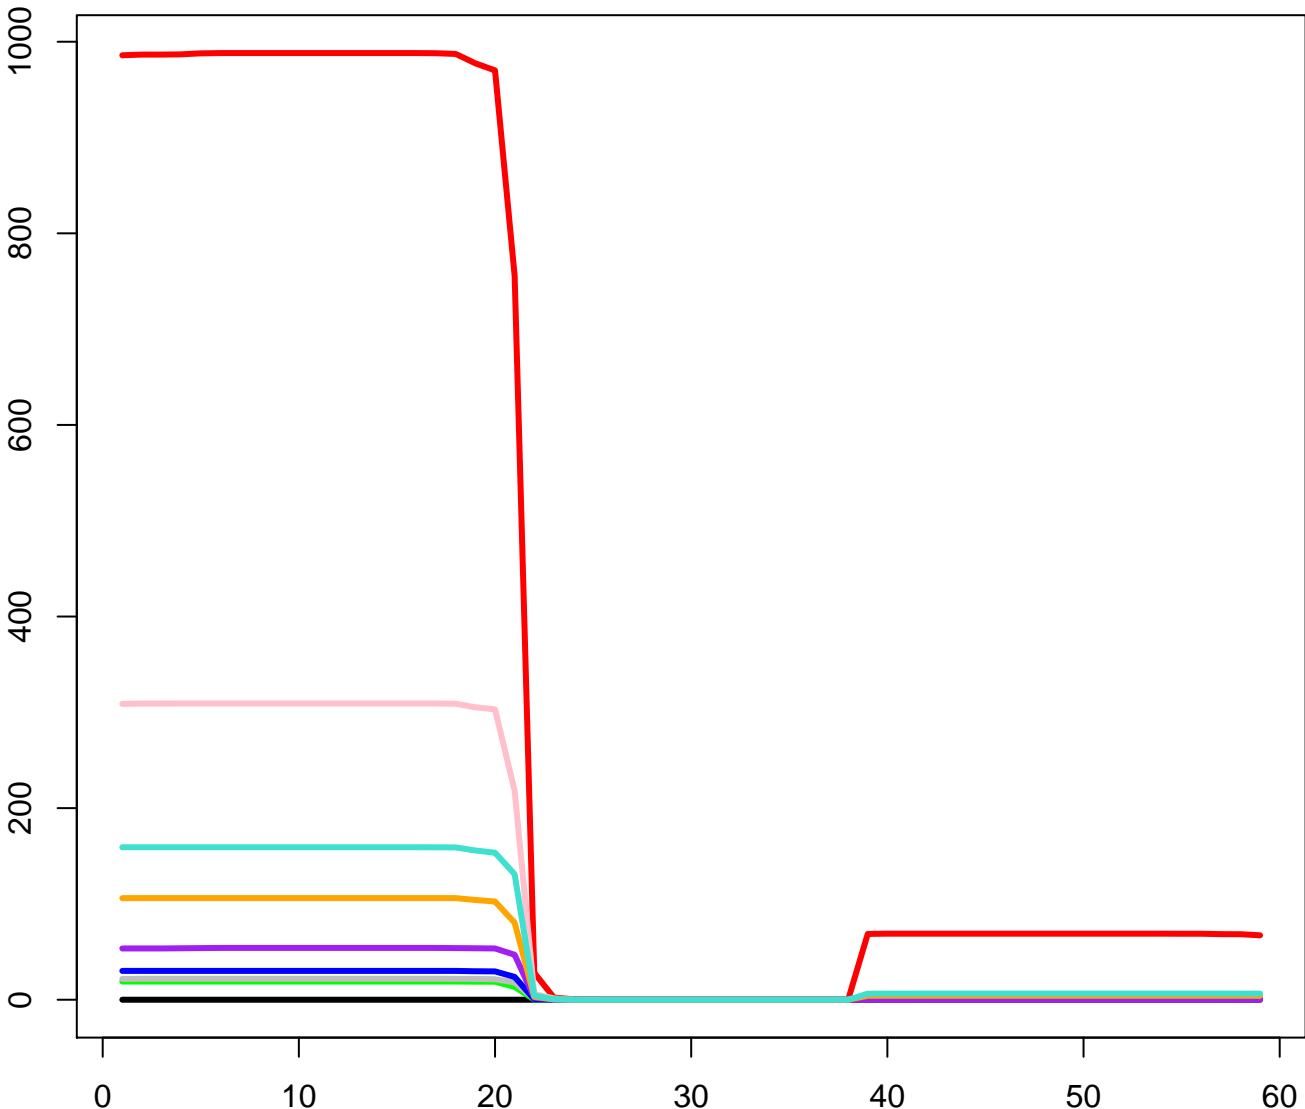

— blood — brain — heart — kidney — lung — ovary — skin — muscle — testis







# 8\_69255552-69255605(-)\_mir-299b\_low

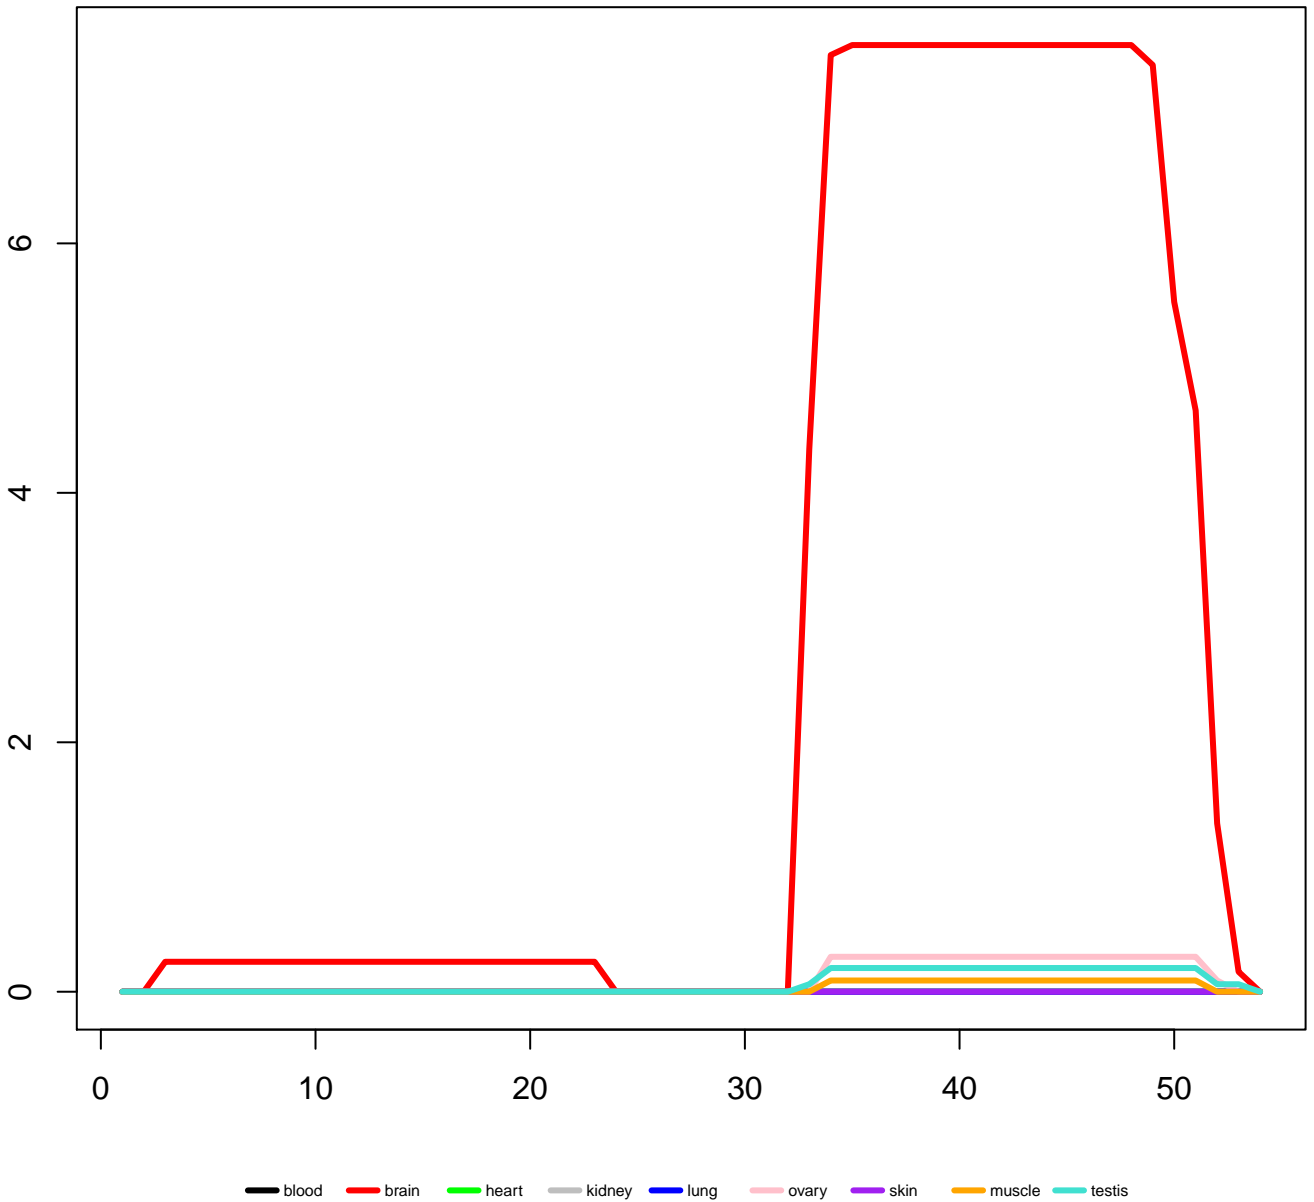

# 8\_69256764-69256820(+)\_cfa-mir-380\_high

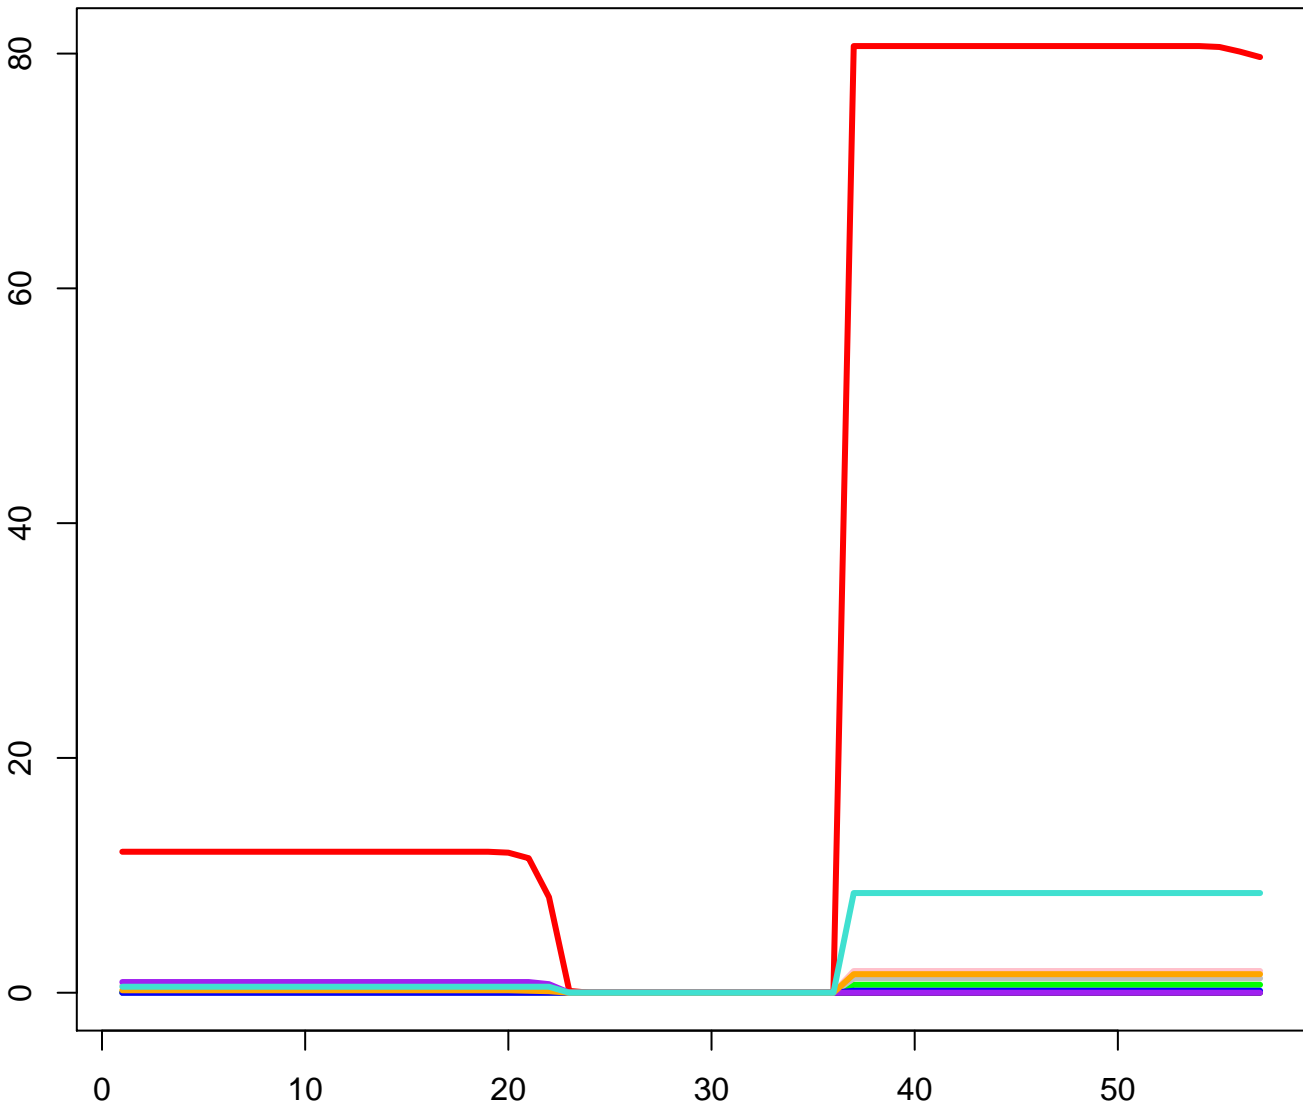

blood brain heart kidney lung ovary skin muscle testis





# 8\_69257494-69257549(+)\_cfa-mir-323\_high

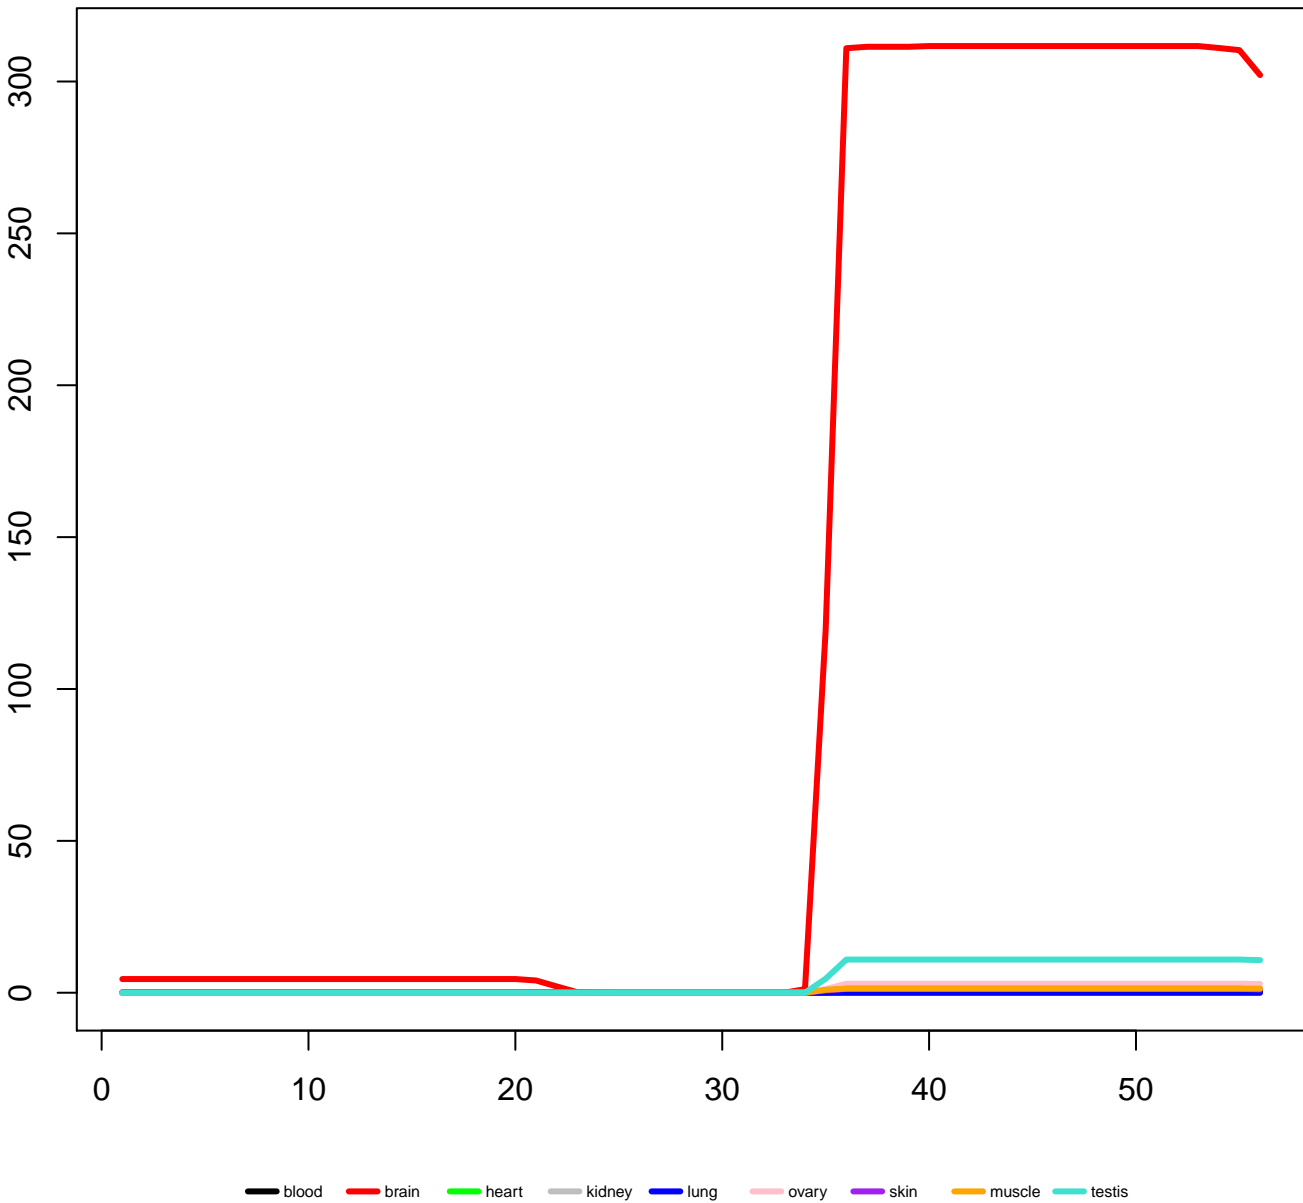

# 8\_69257782-69257862(+)\_cfa-mir-758\_high

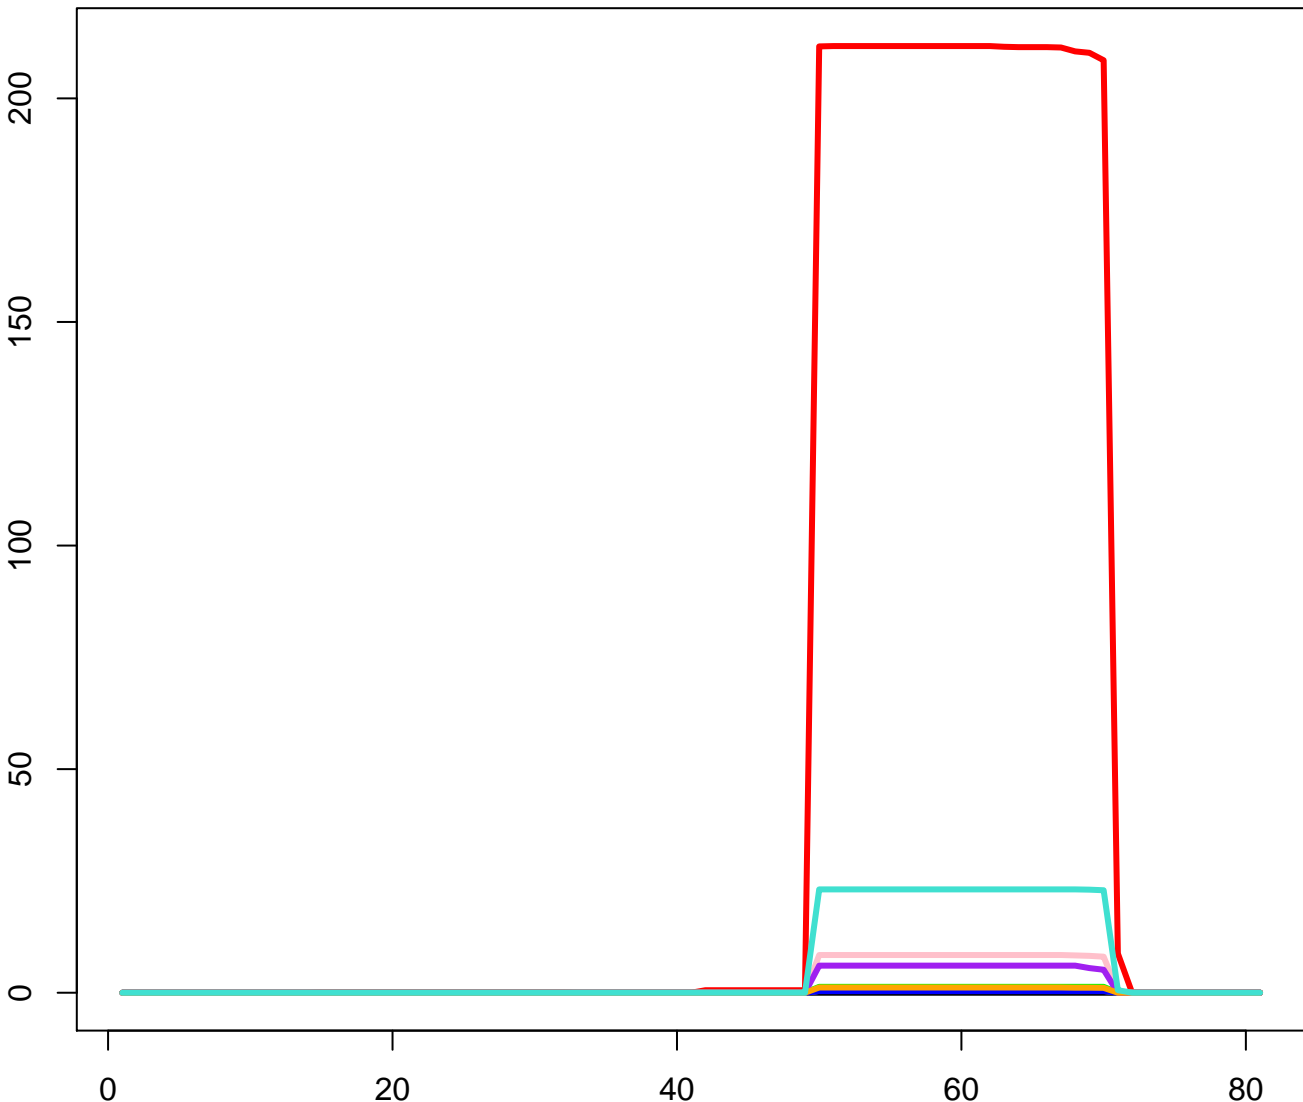

— blood — brain — heart — kidney — lung — ovary — skin — muscle — testis





# 8\_69258855-69258914(+)\_cfa-mir-329a\_high

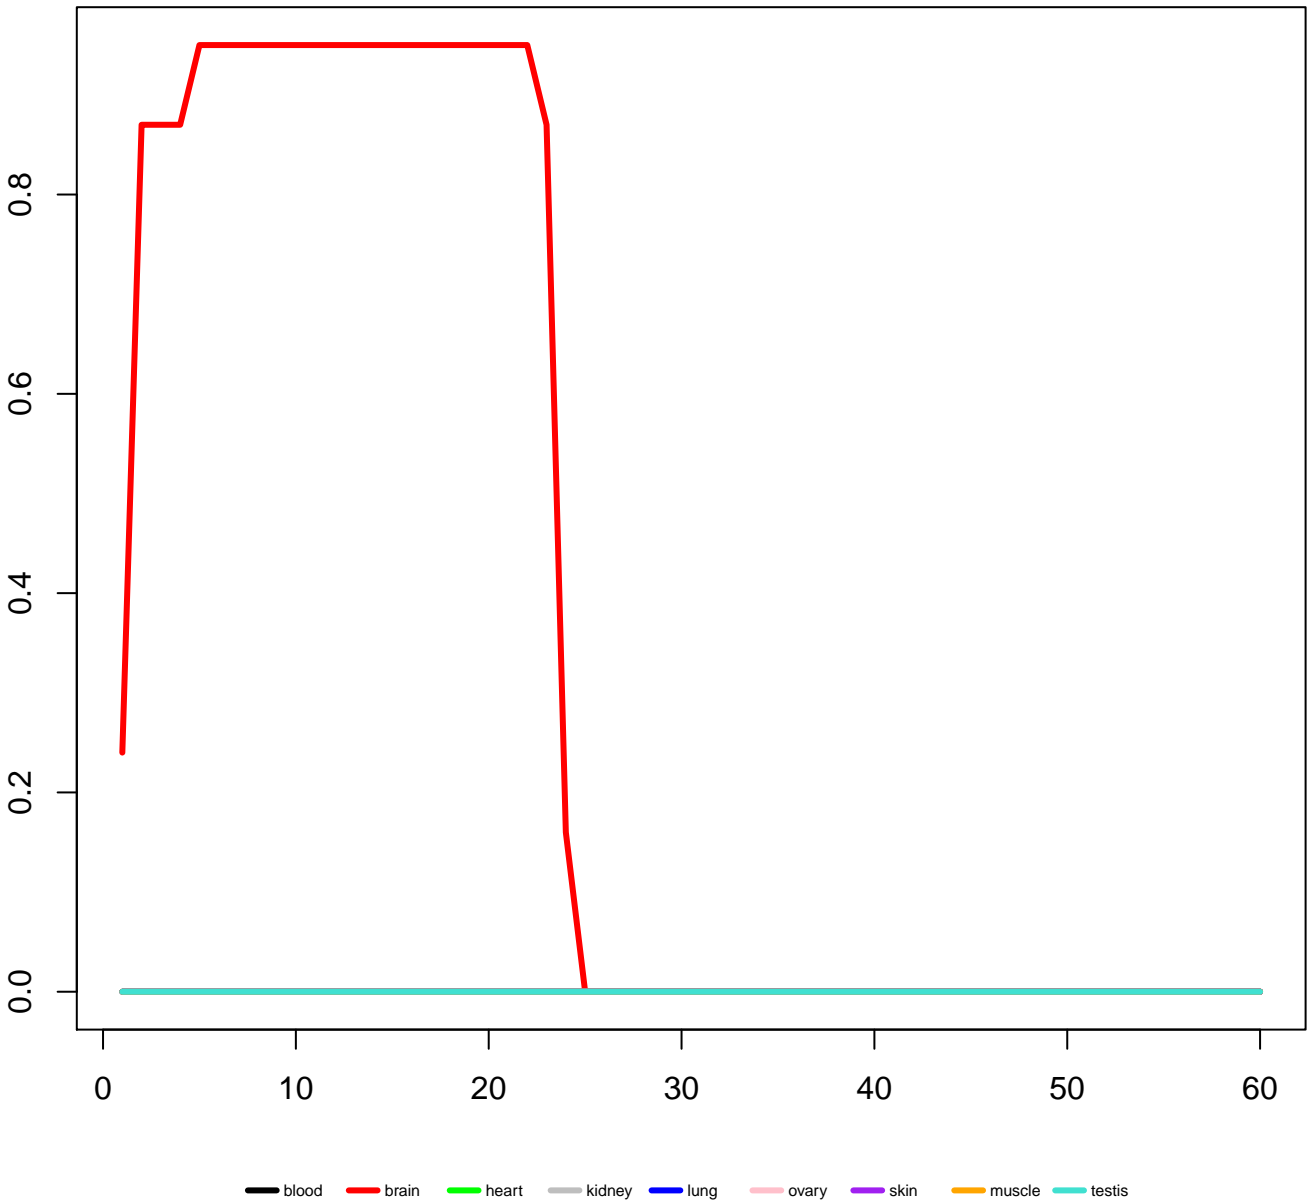

# 8\_69261385-69261465(+)\_cfa-mir-494\_high

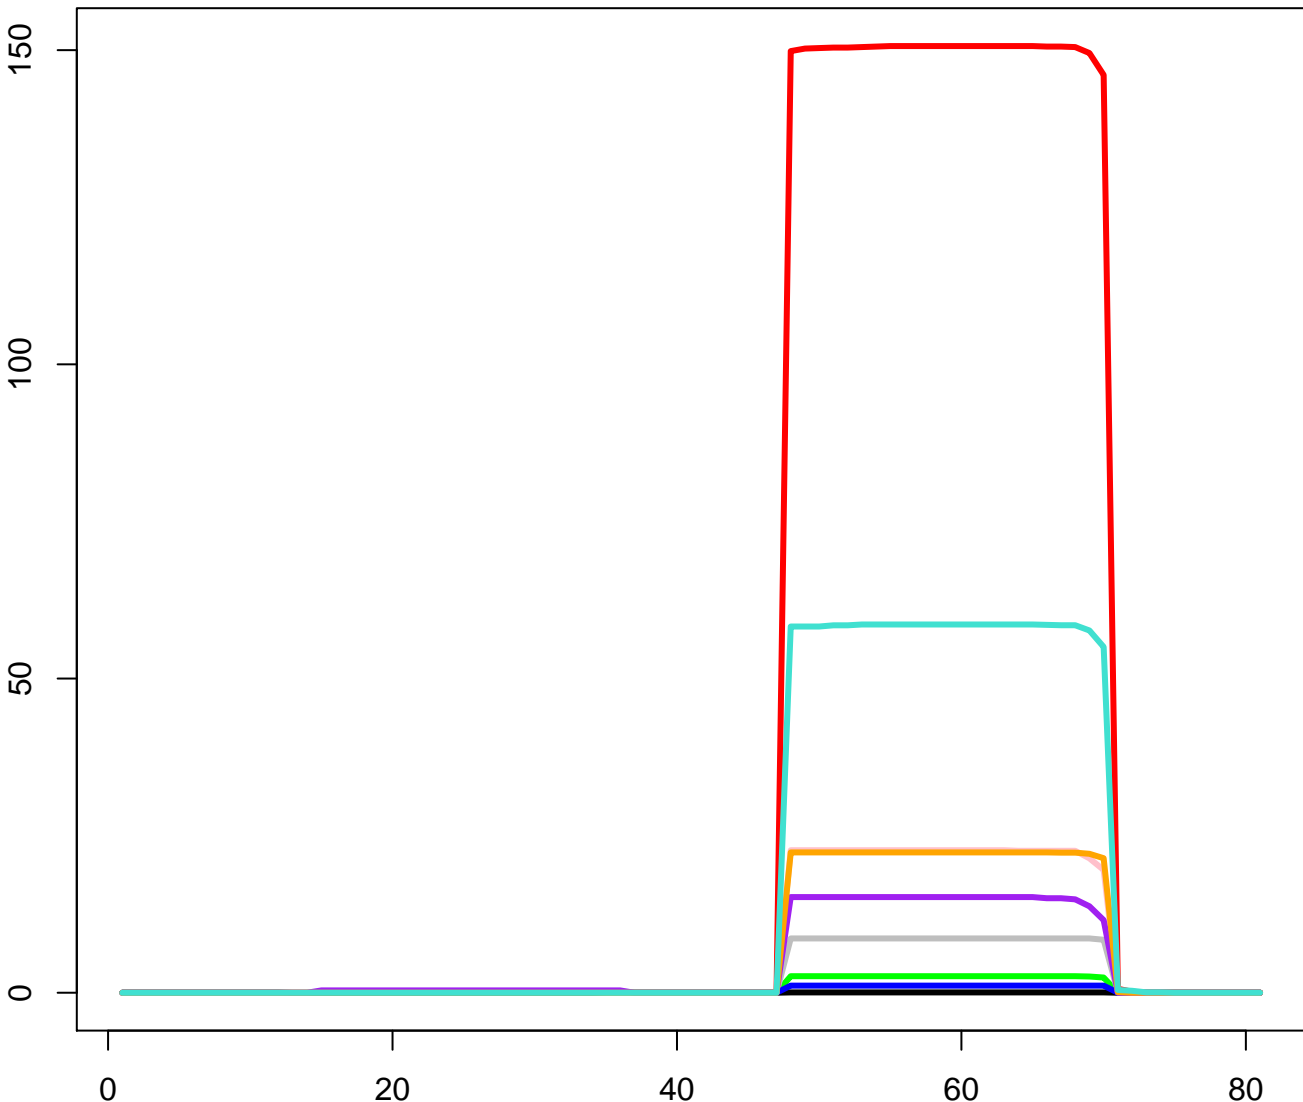

— blood — brain — heart — kidney — lung — ovary — skin — muscle — testis



# 8\_69263406-69263463(+)\_cfa-mir-543\_high

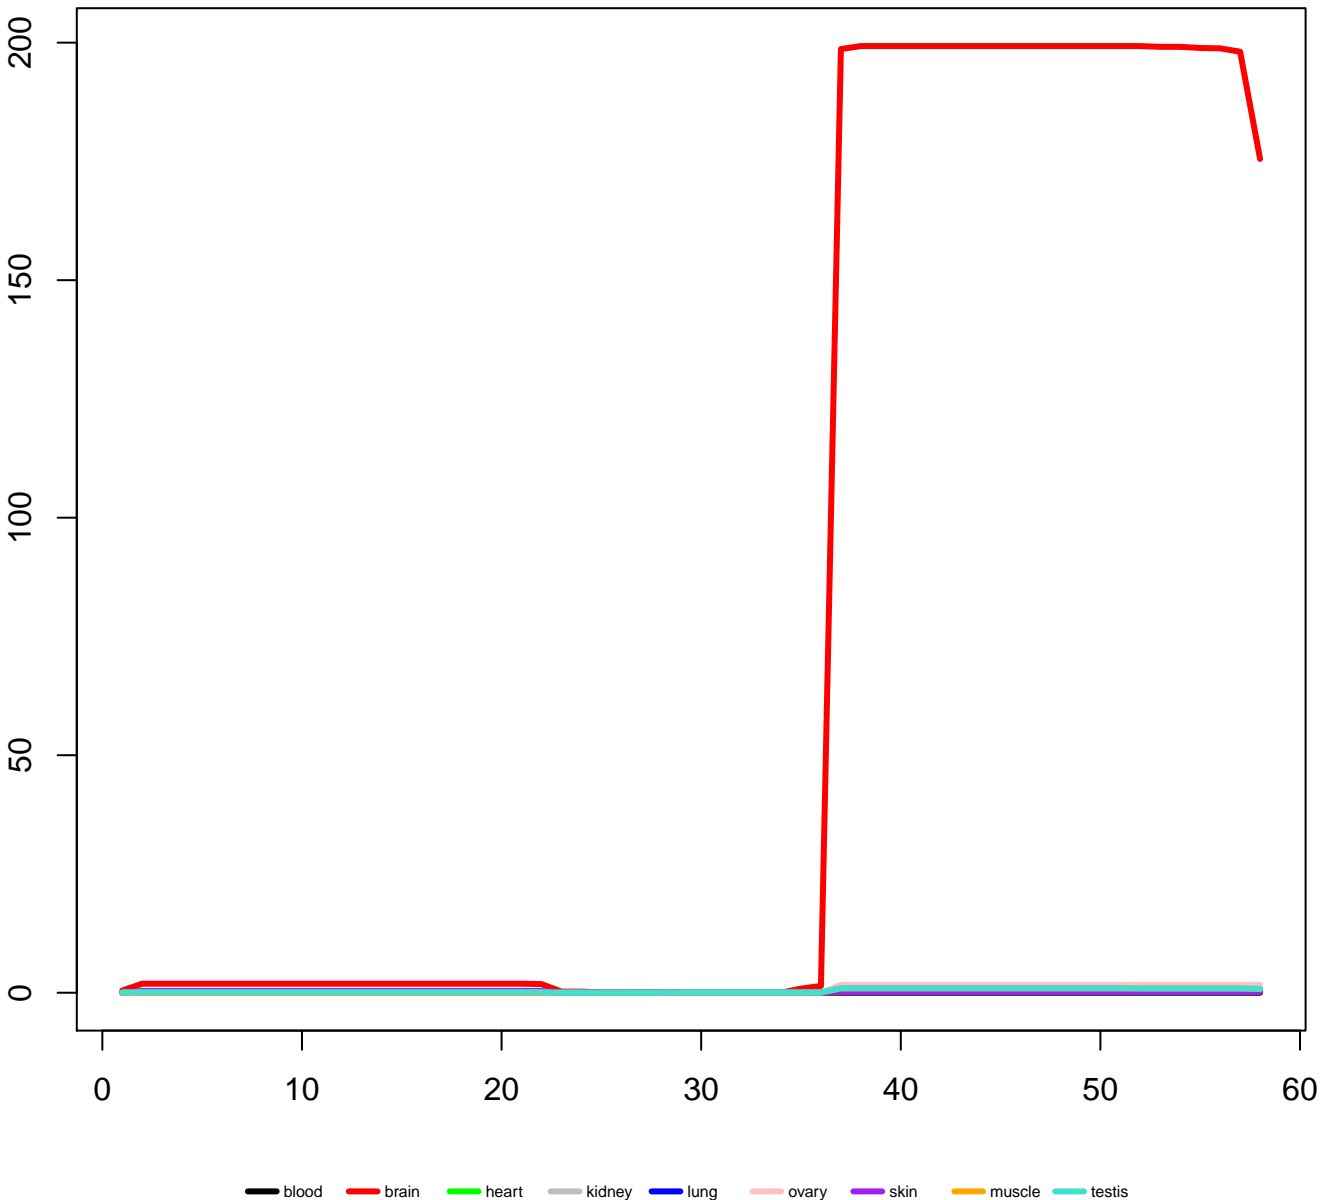

# 8\_69265169-69265226(+)\_cfa-mir-495\_high

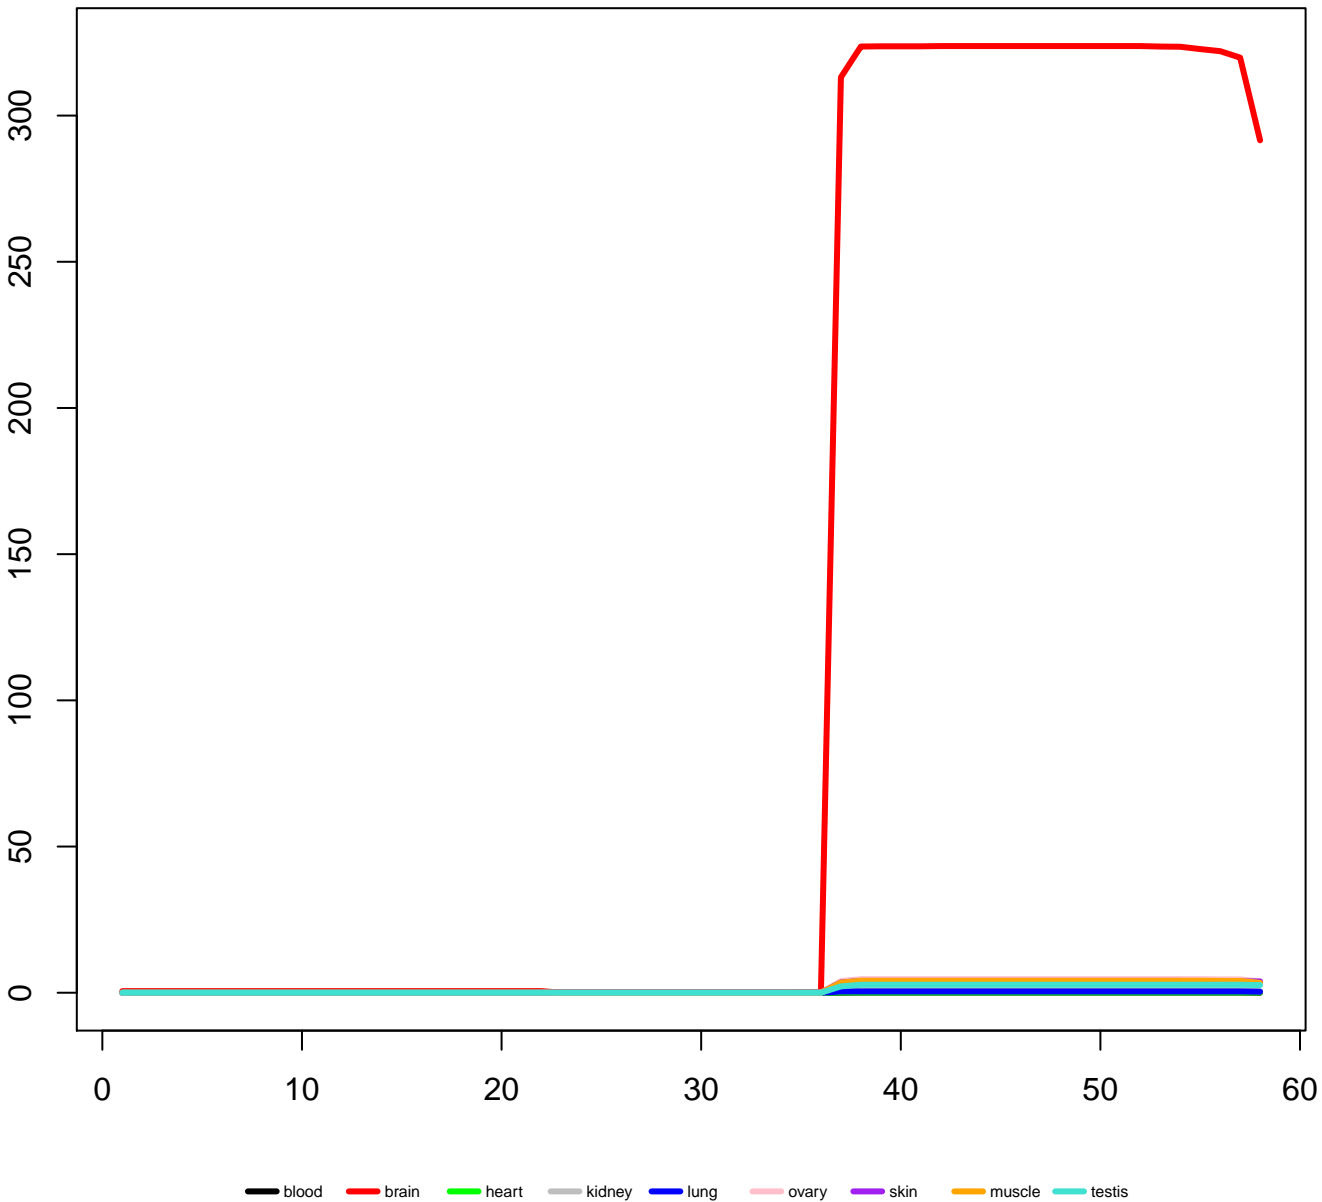

# 8\_69267134-69267274(+)\_cfa-mir-3958\_high

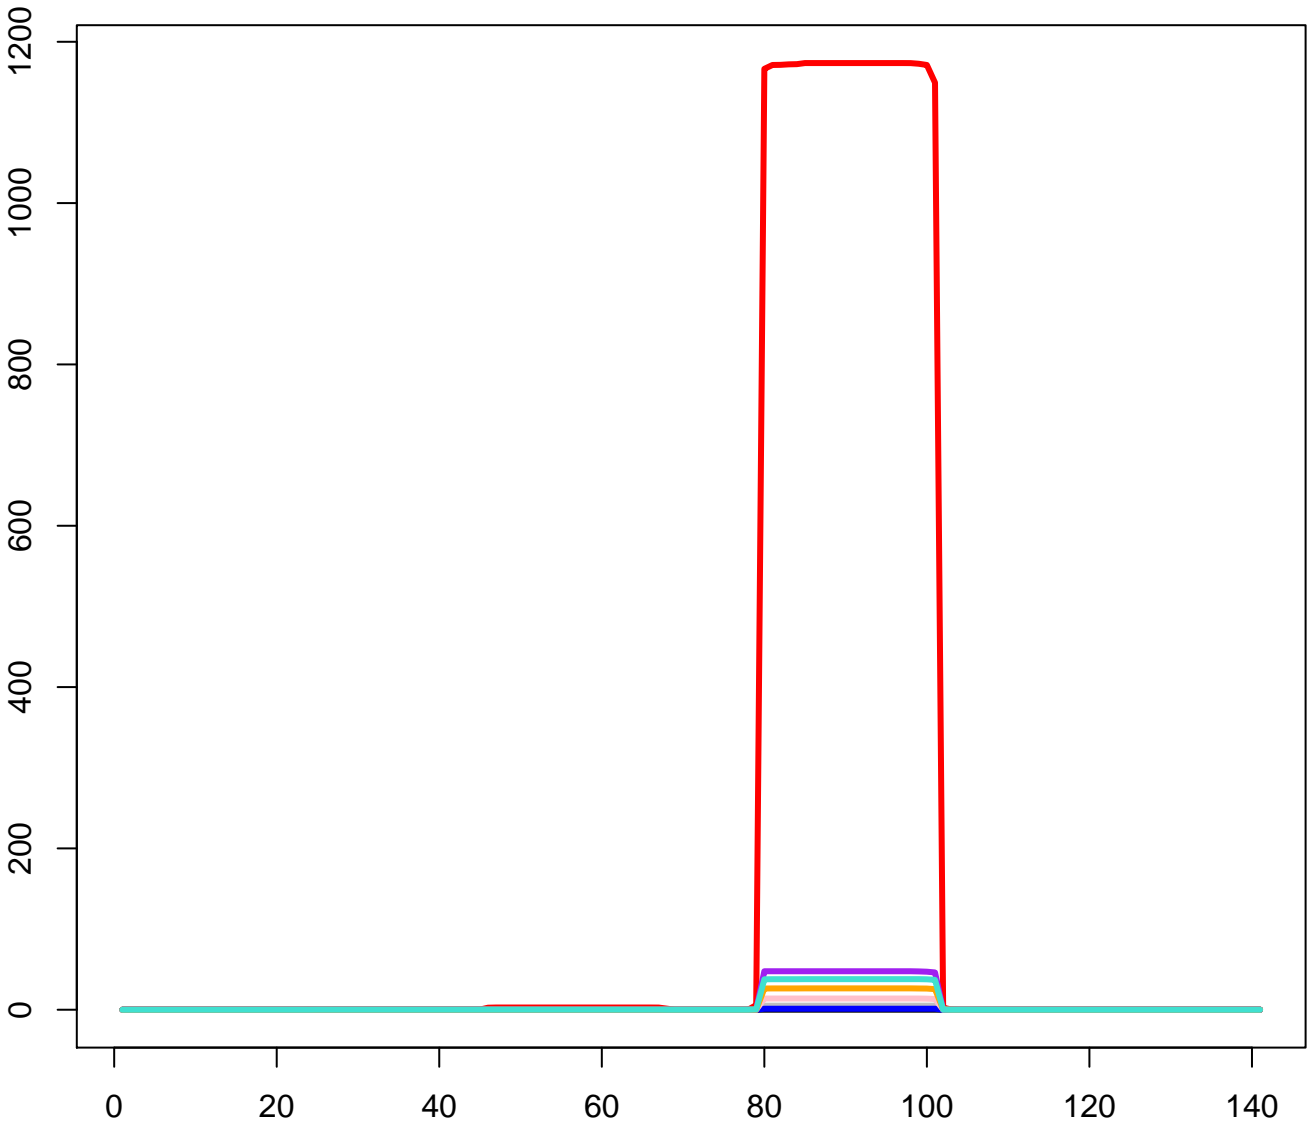

blood brain heart kidney lung ovary skin muscle testis

# 8\_69269752-69269810(+)\_cfa-mir-376a-3\_high

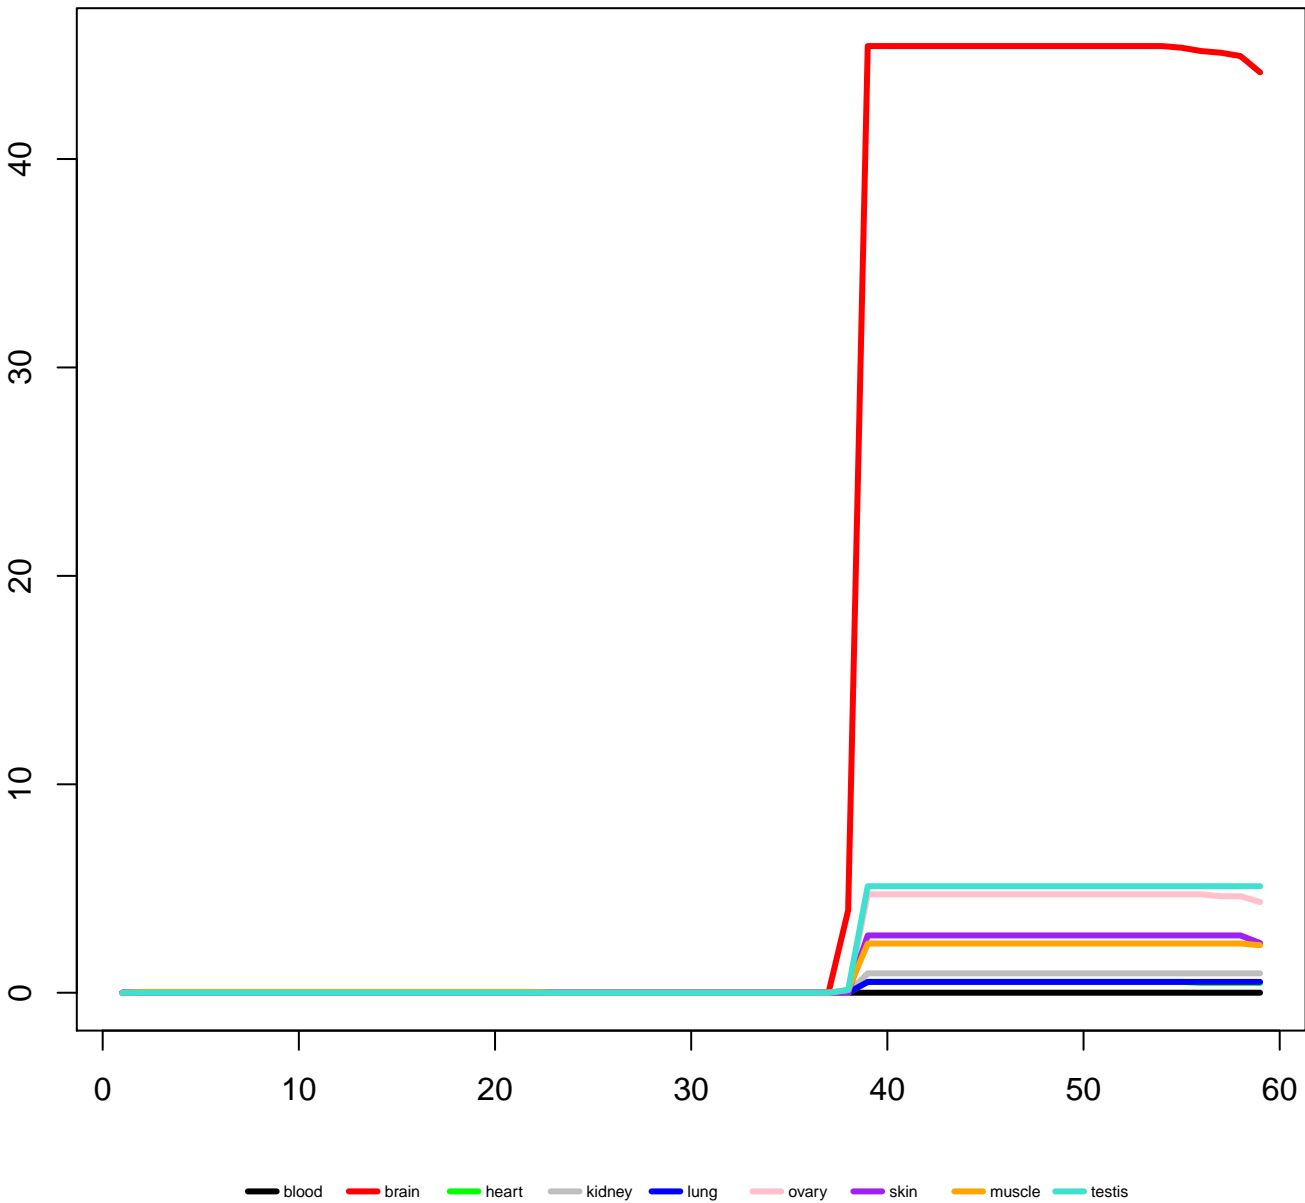



# 8\_69270100-69270185(+)\_cfa-mir-376c\_high

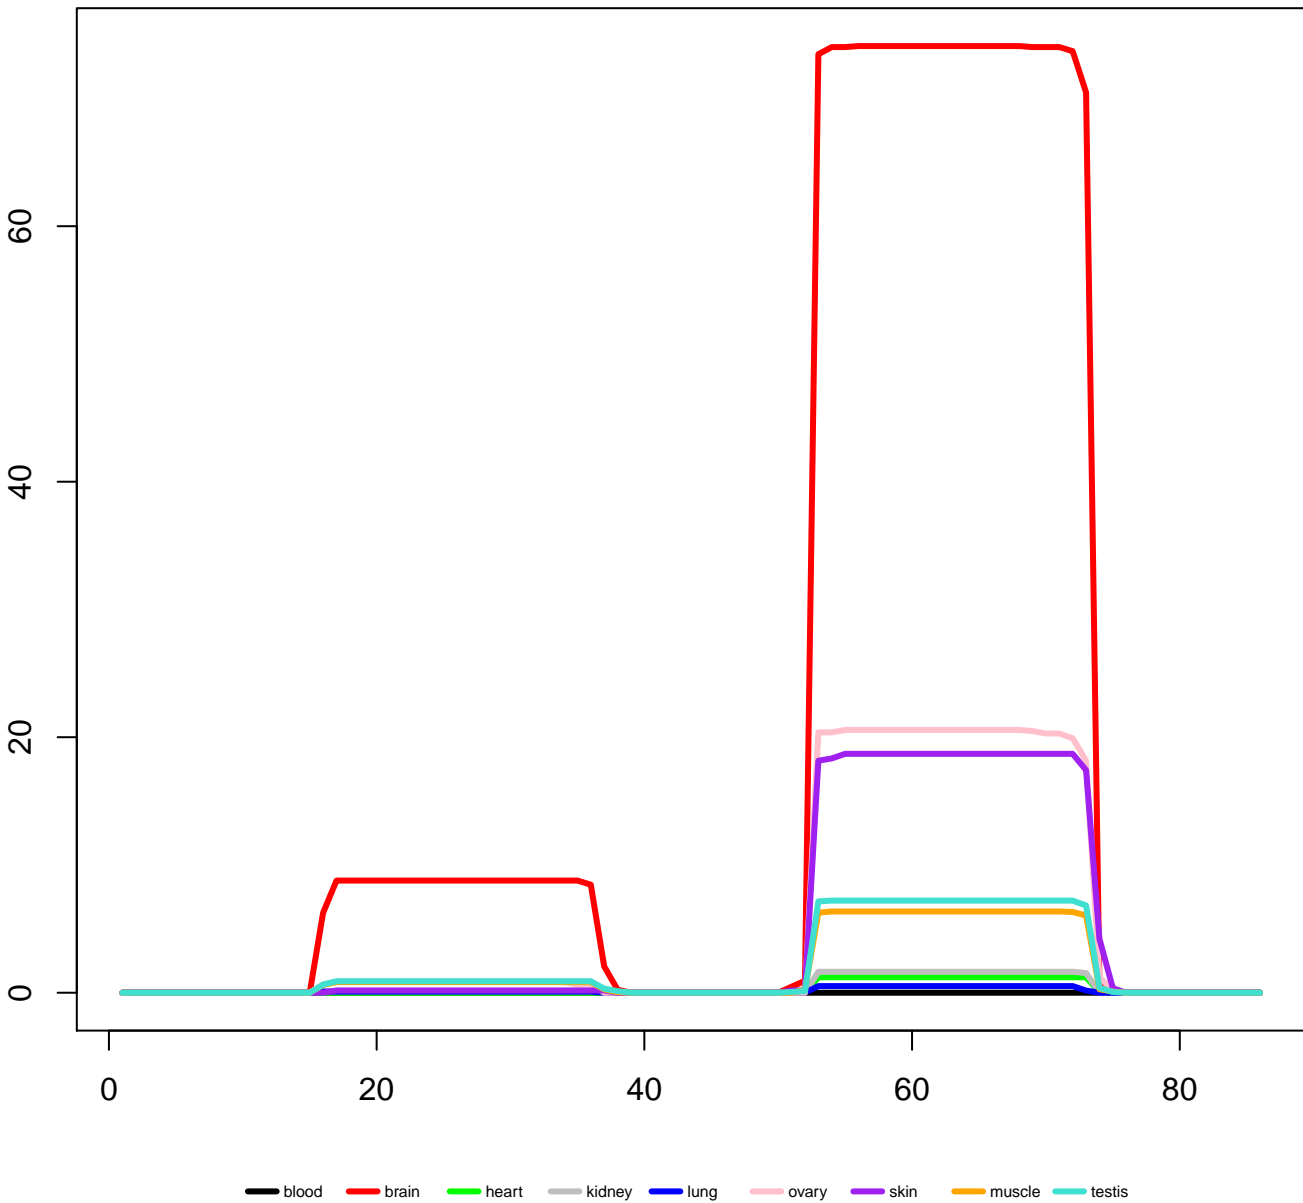

# 8\_69270499-69270556(+)\_cfa-mir-376a-2\_high

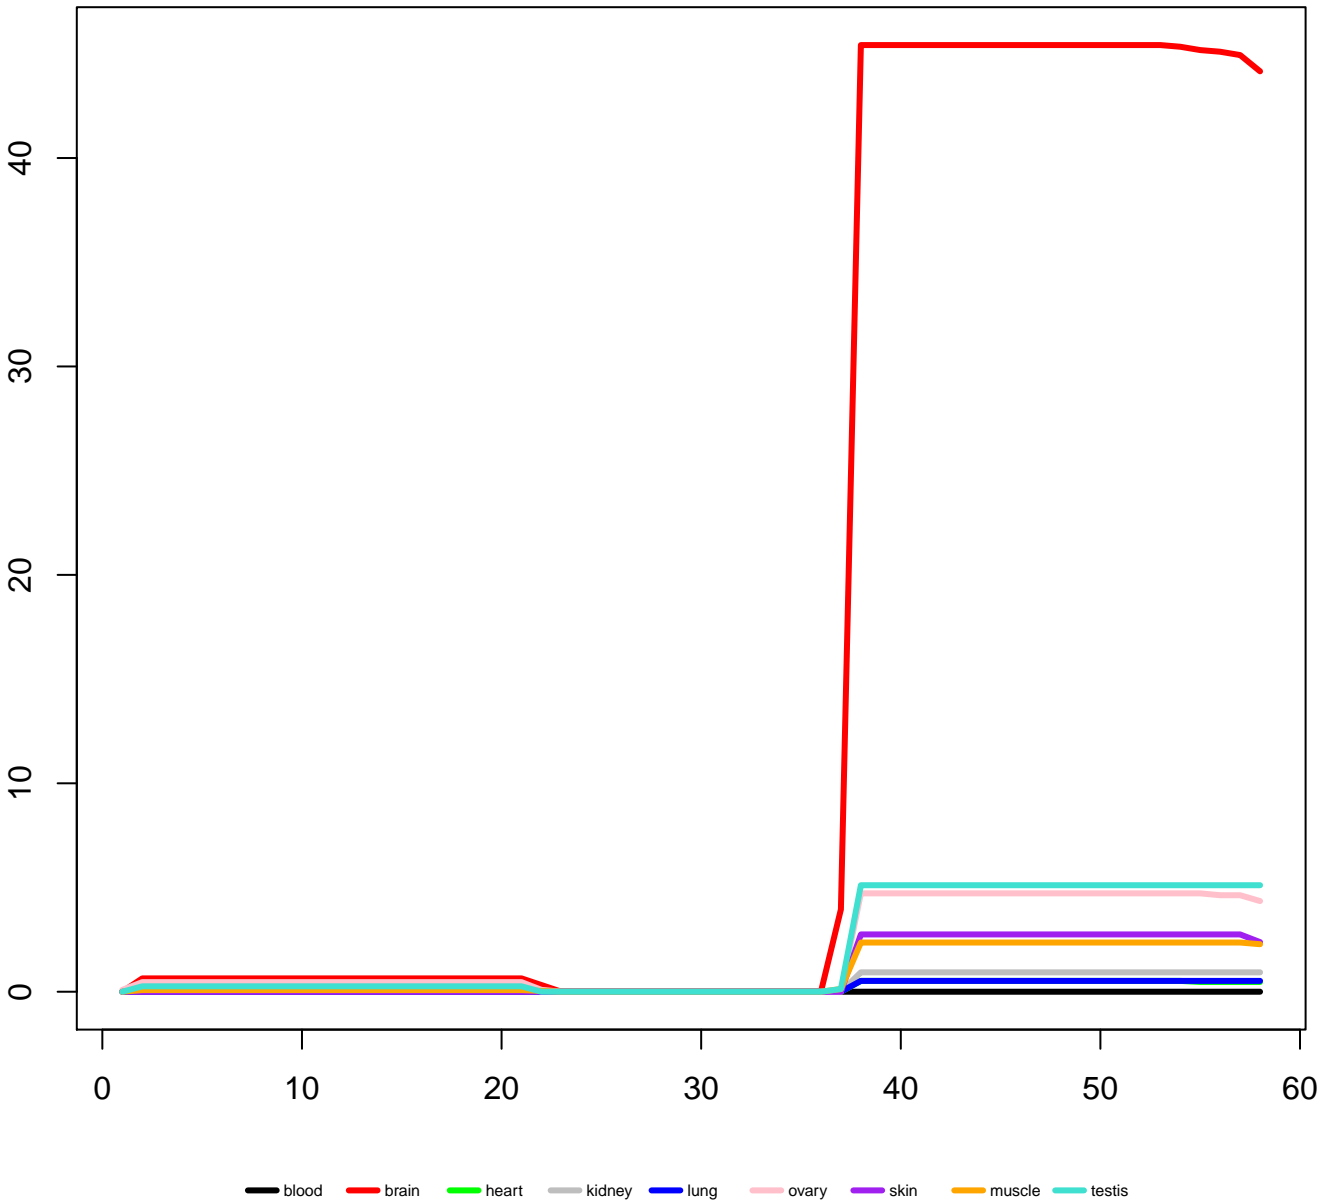



# 8\_69270858-69270956(+)\_cfa-mir-376b\_high

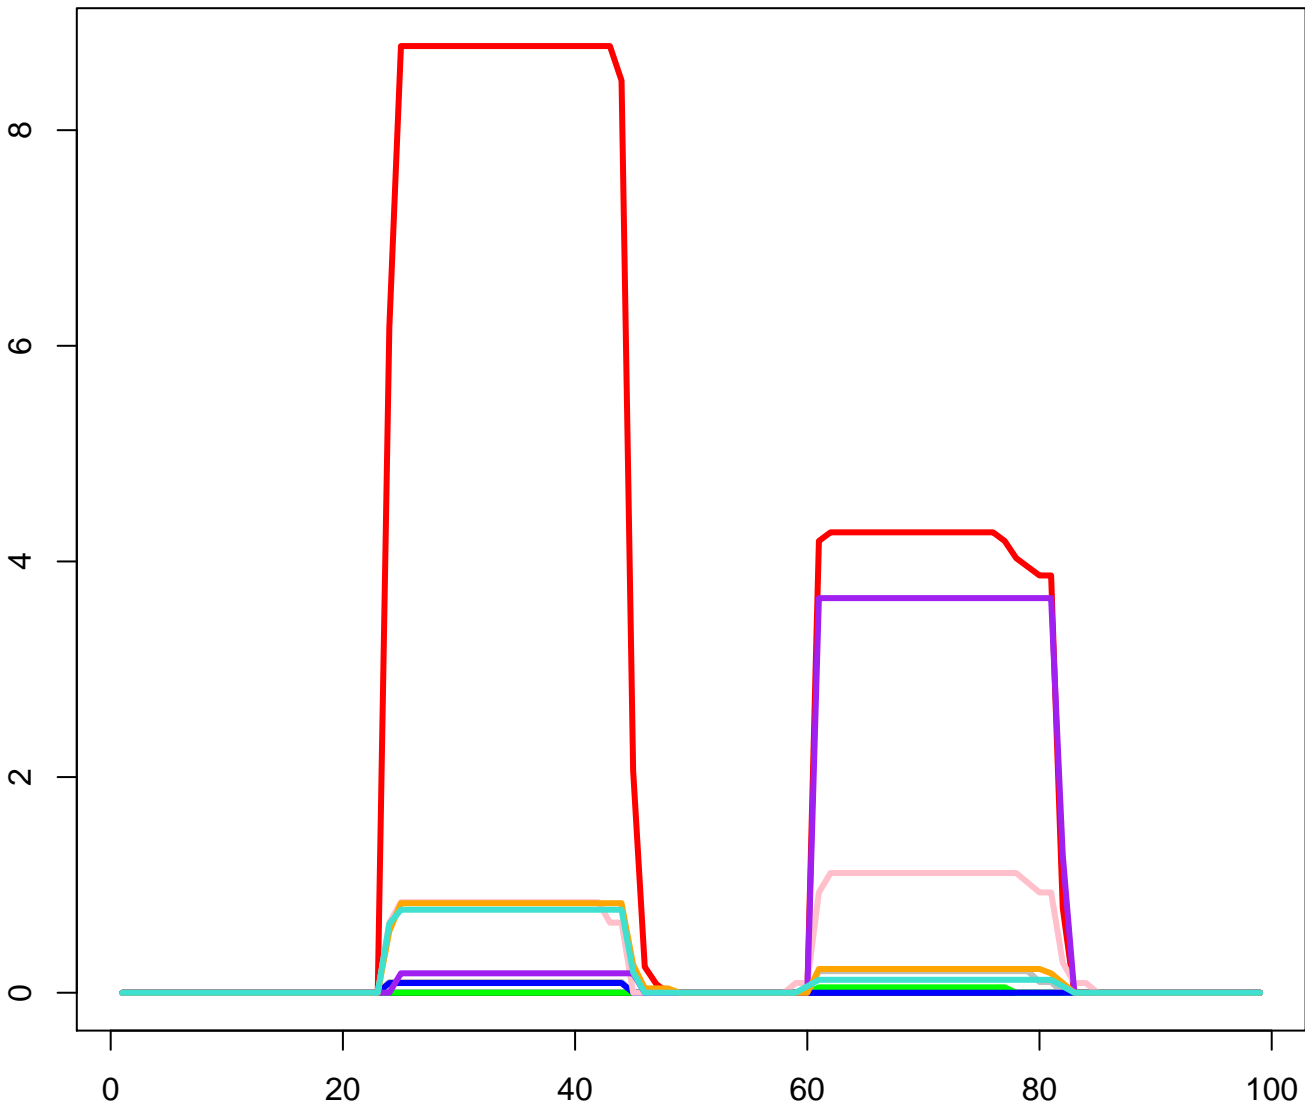

— blood — brain — heart — kidney — lung — ovary — skin — muscle — testis

# 8\_69271259-69271316(+)\_cfa-mir-376a-1\_high

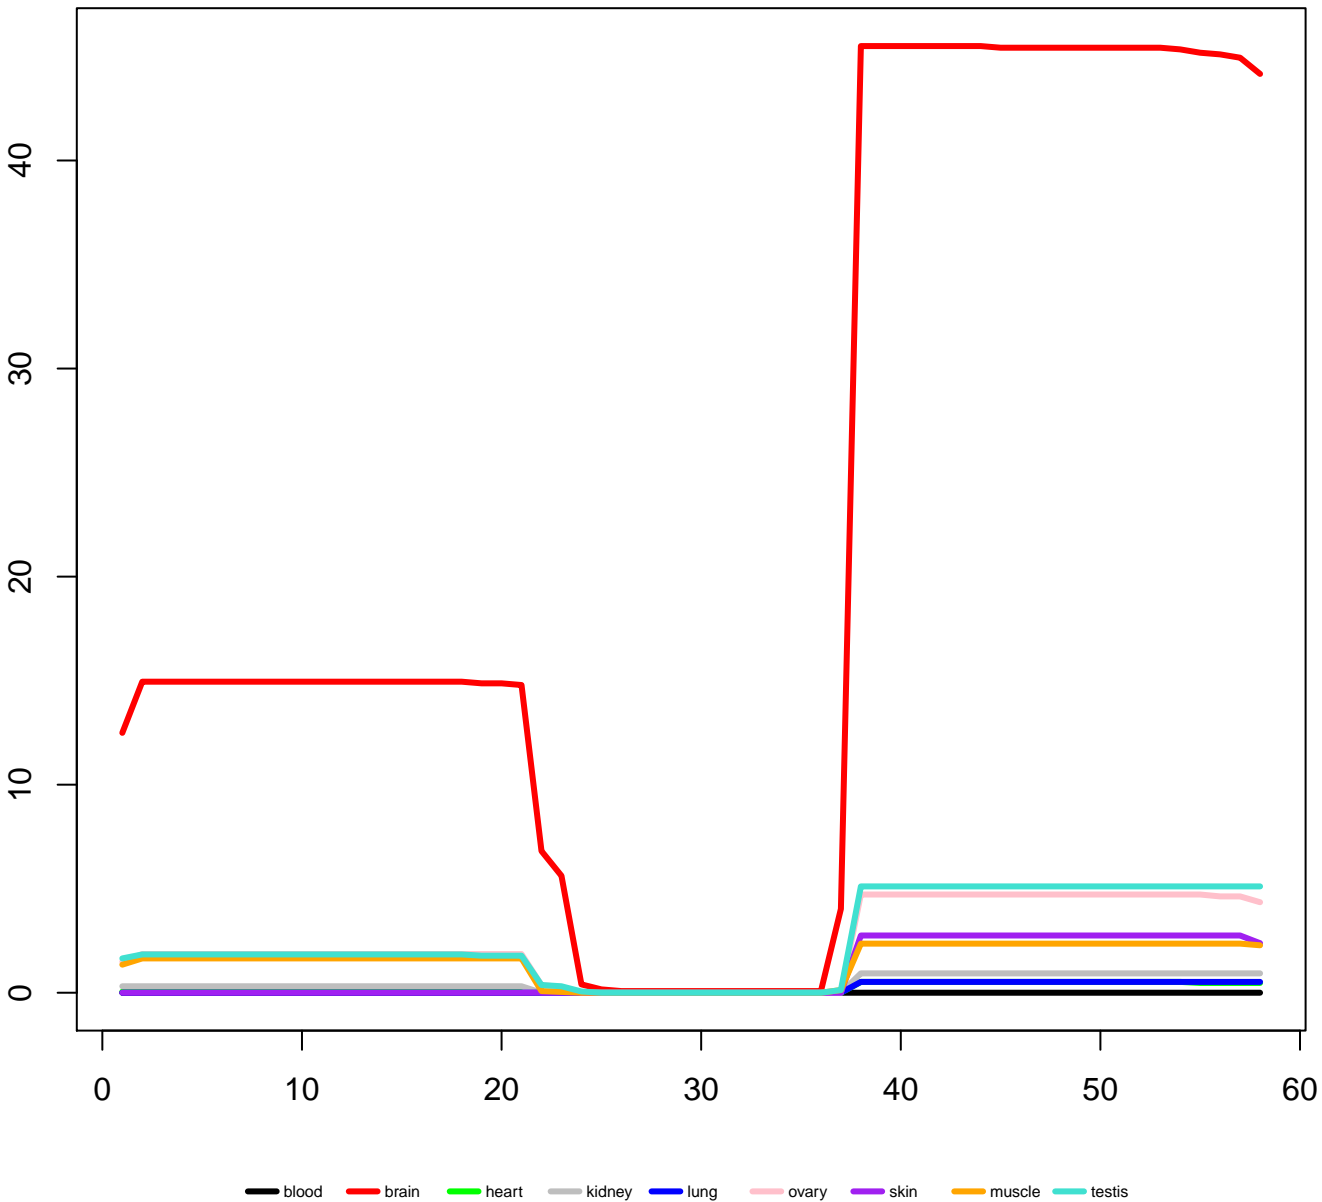

# 8\_69271815-69271892(+)\_cfa-mir-300\_high

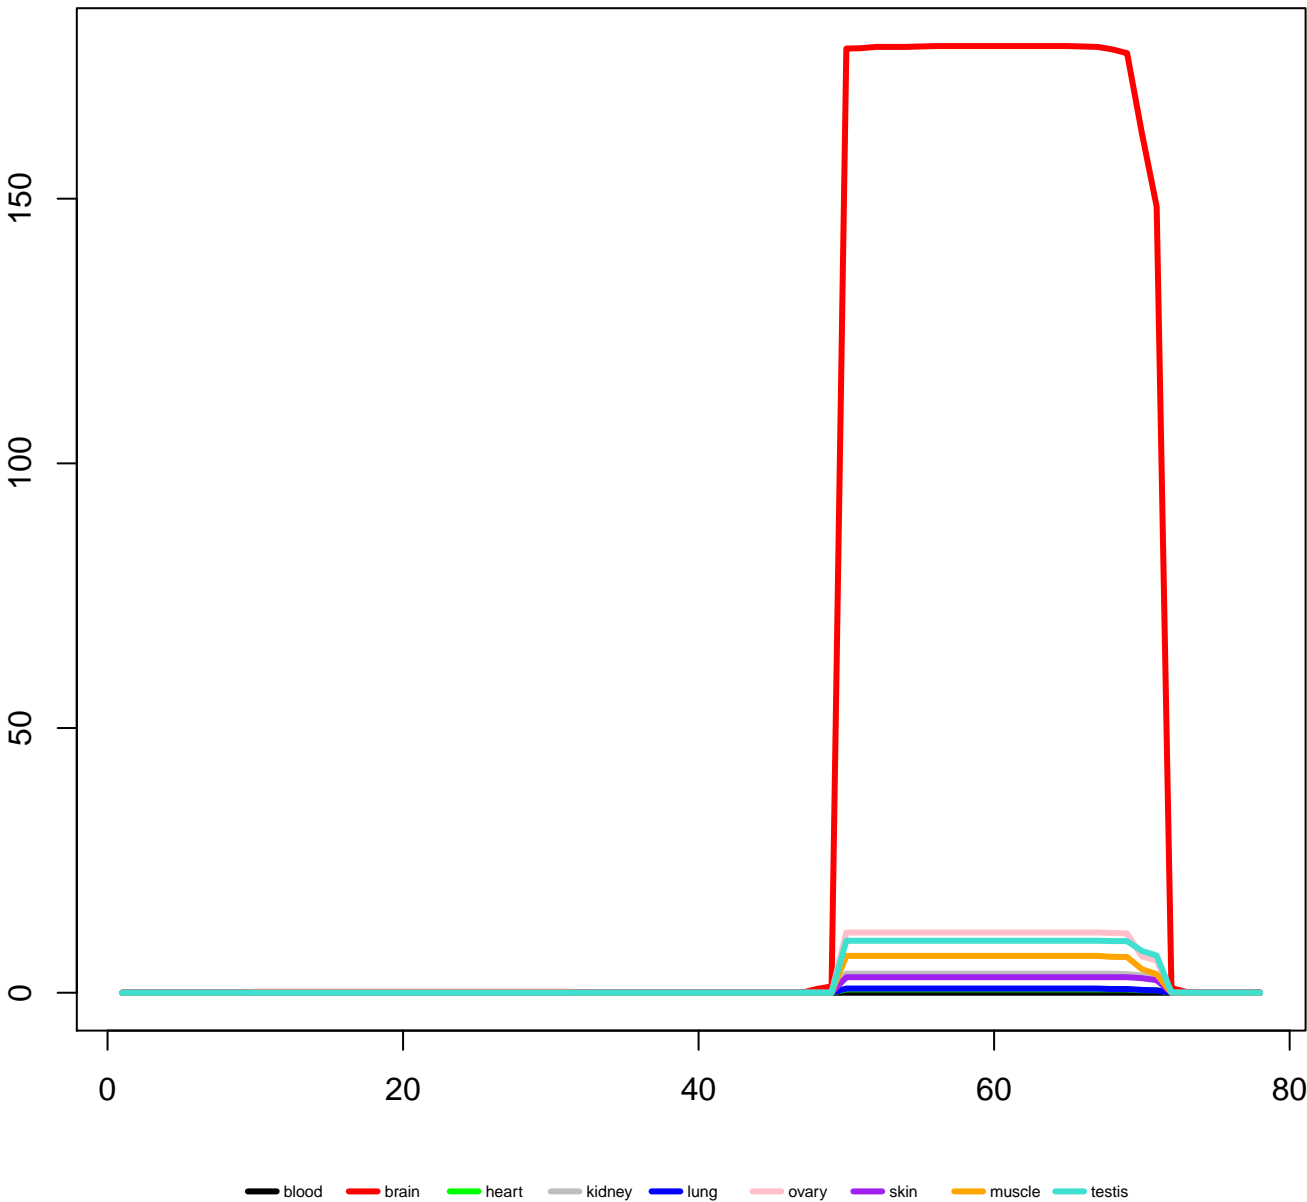



# 8\_69274983-69275057(+)\_cfa-mir-381\_high

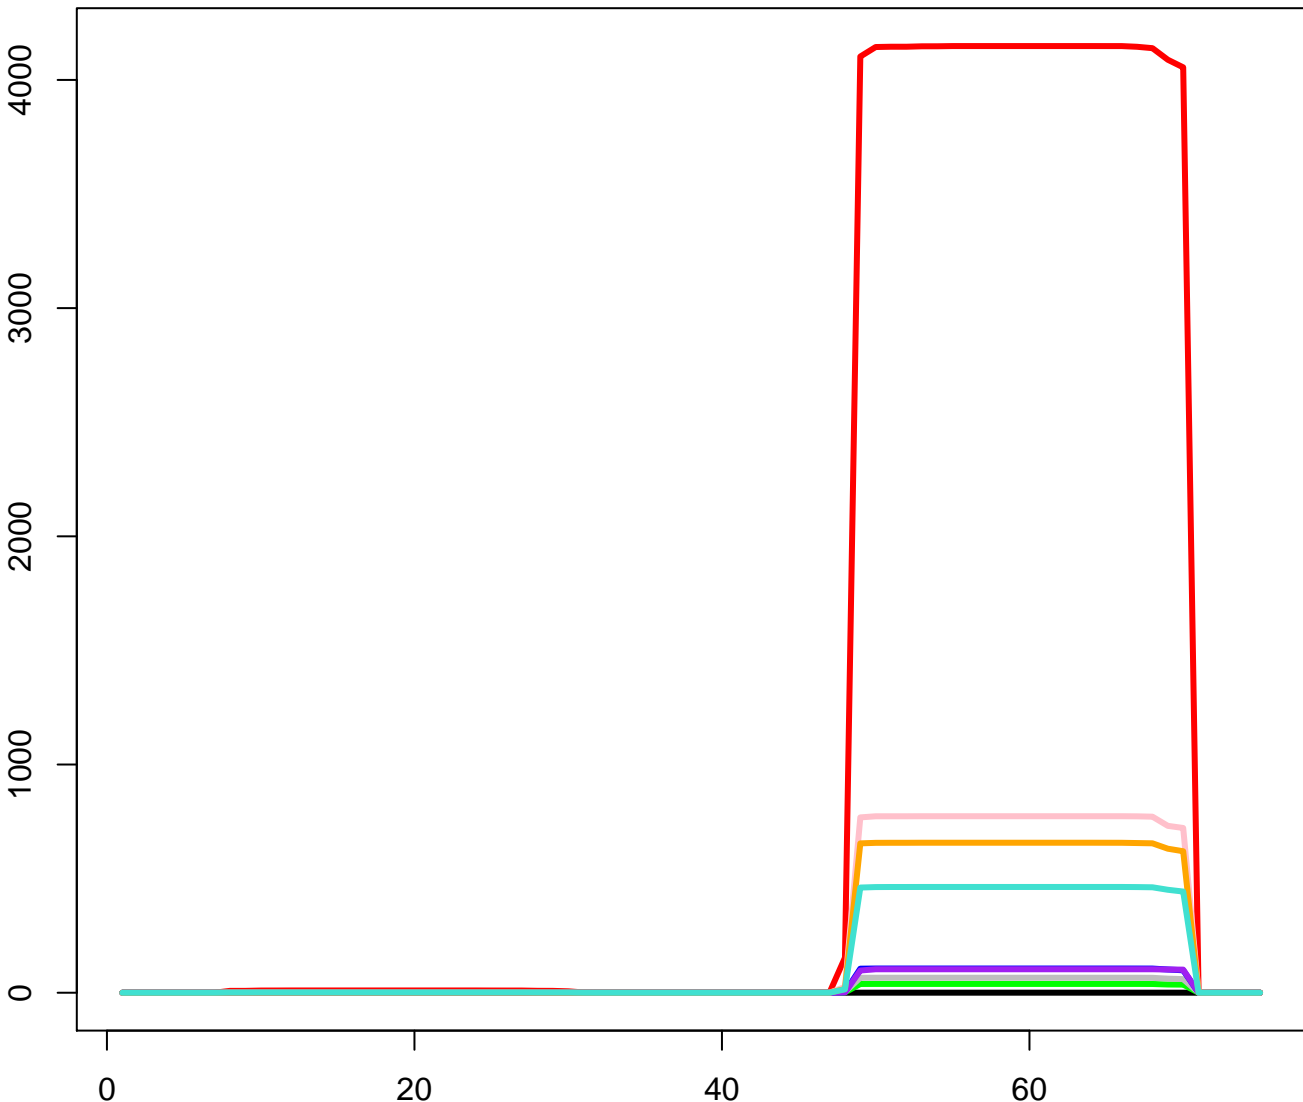

— blood — brain — heart — kidney — lung — ovary — skin — muscle — testis



# 8\_69275496-69275553(+)\_cfa-mir-487b\_high

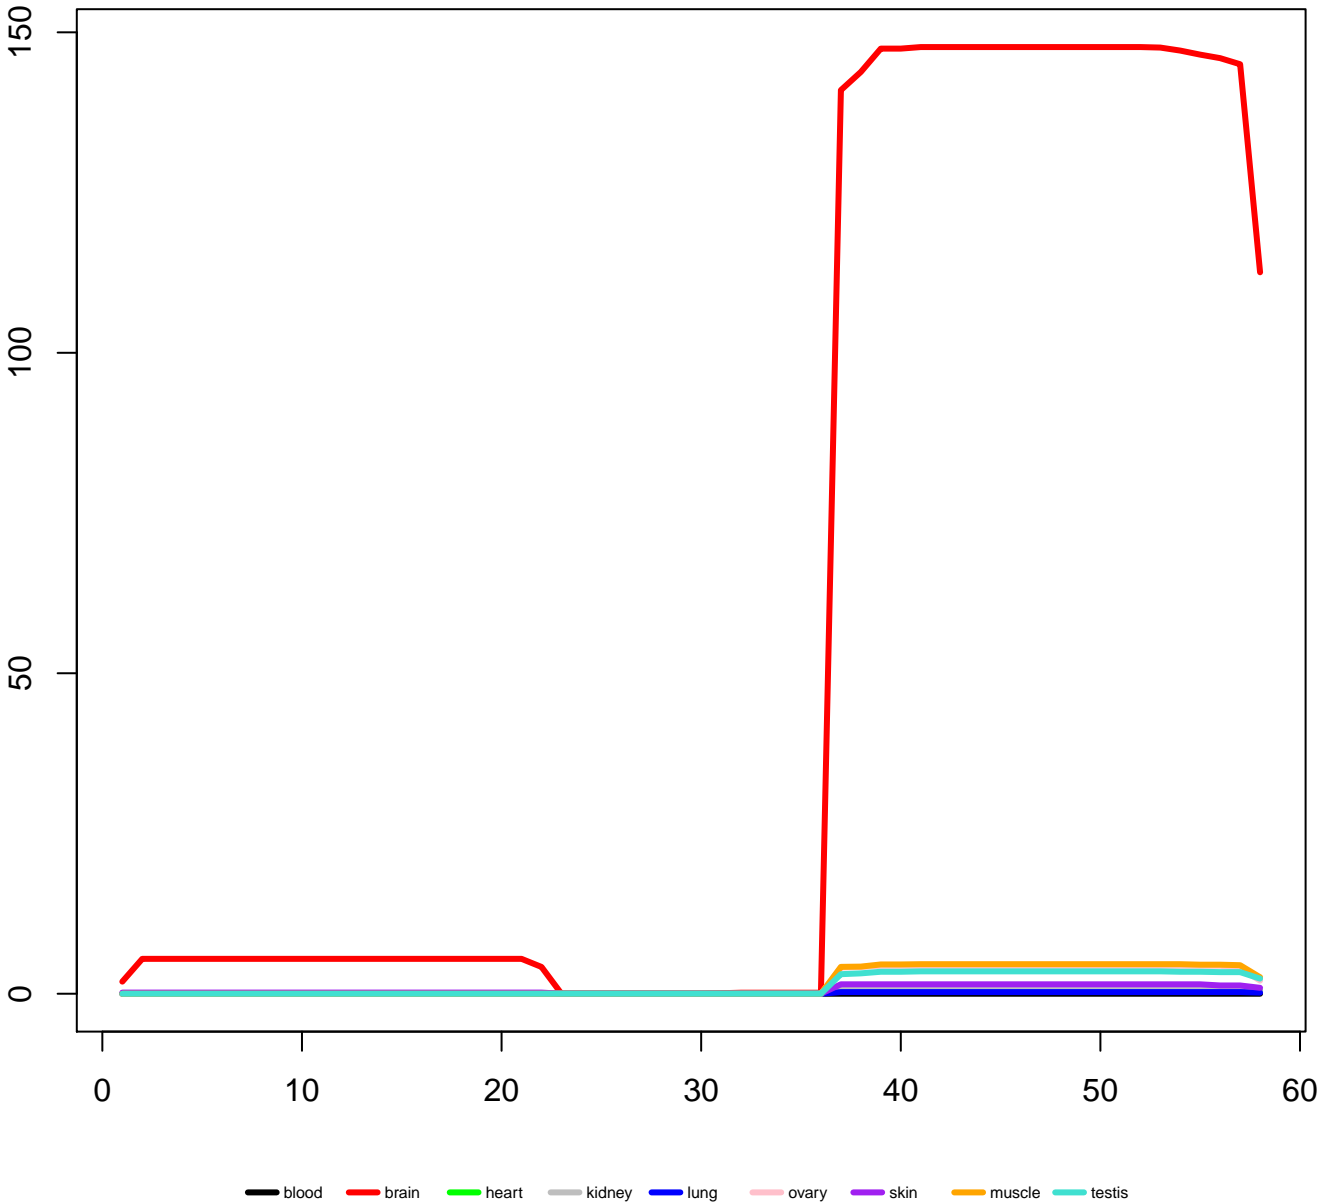

# 8\_69276311-69276386(+)\_cfa-mir-539\_high

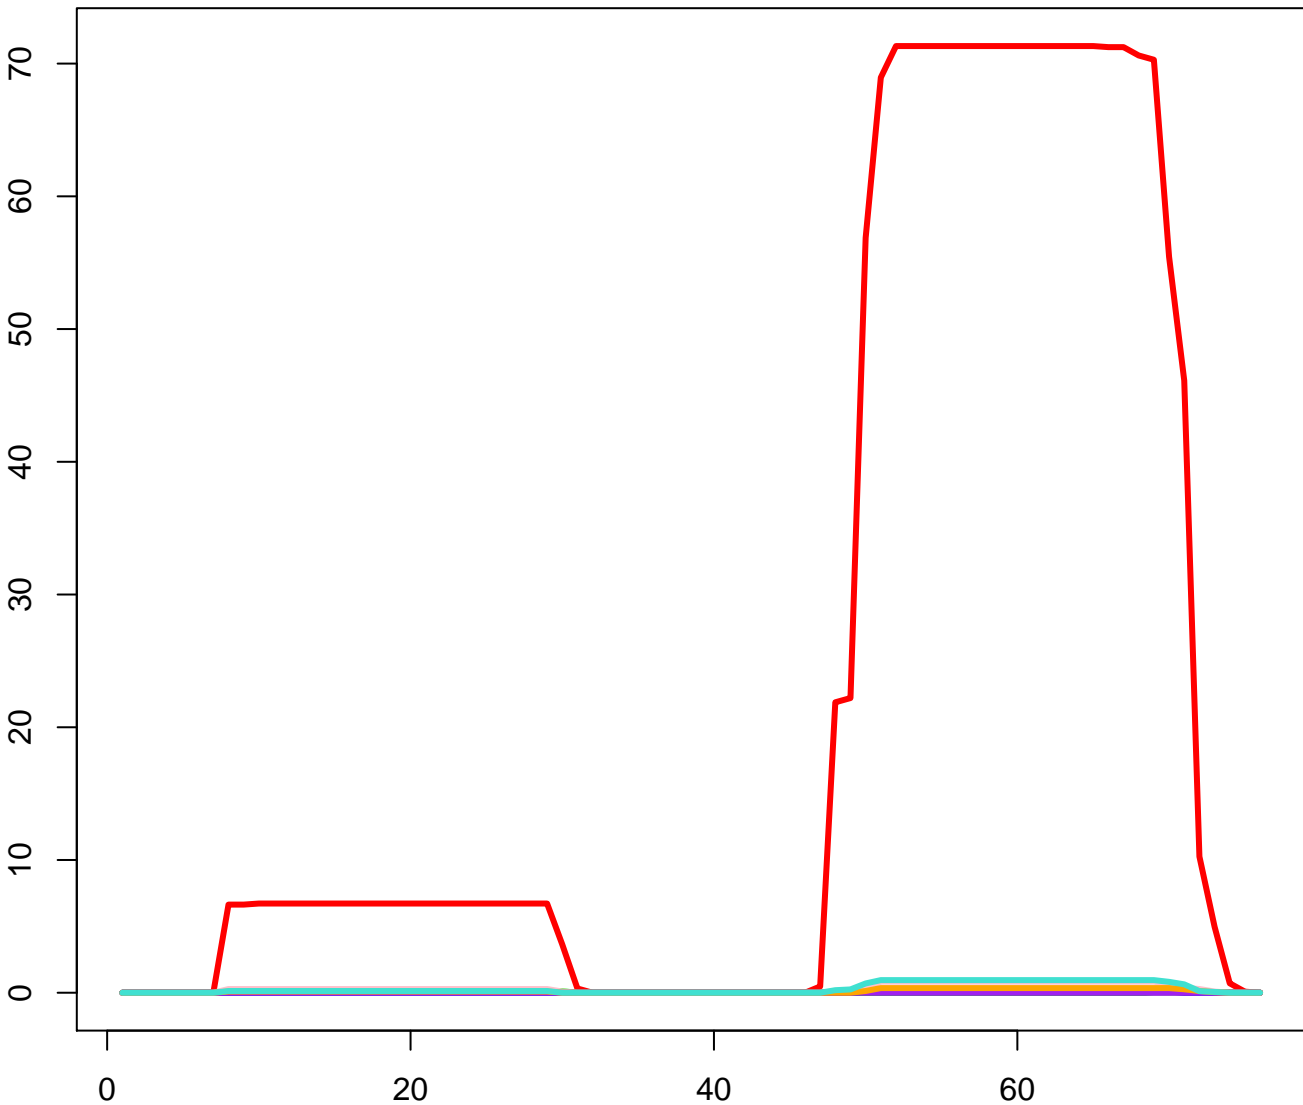

— blood — brain — heart — kidney — lung — ovary — skin — muscle — testis

# 8\_69276842-69276980(+)\_cfa-mir-889\_high

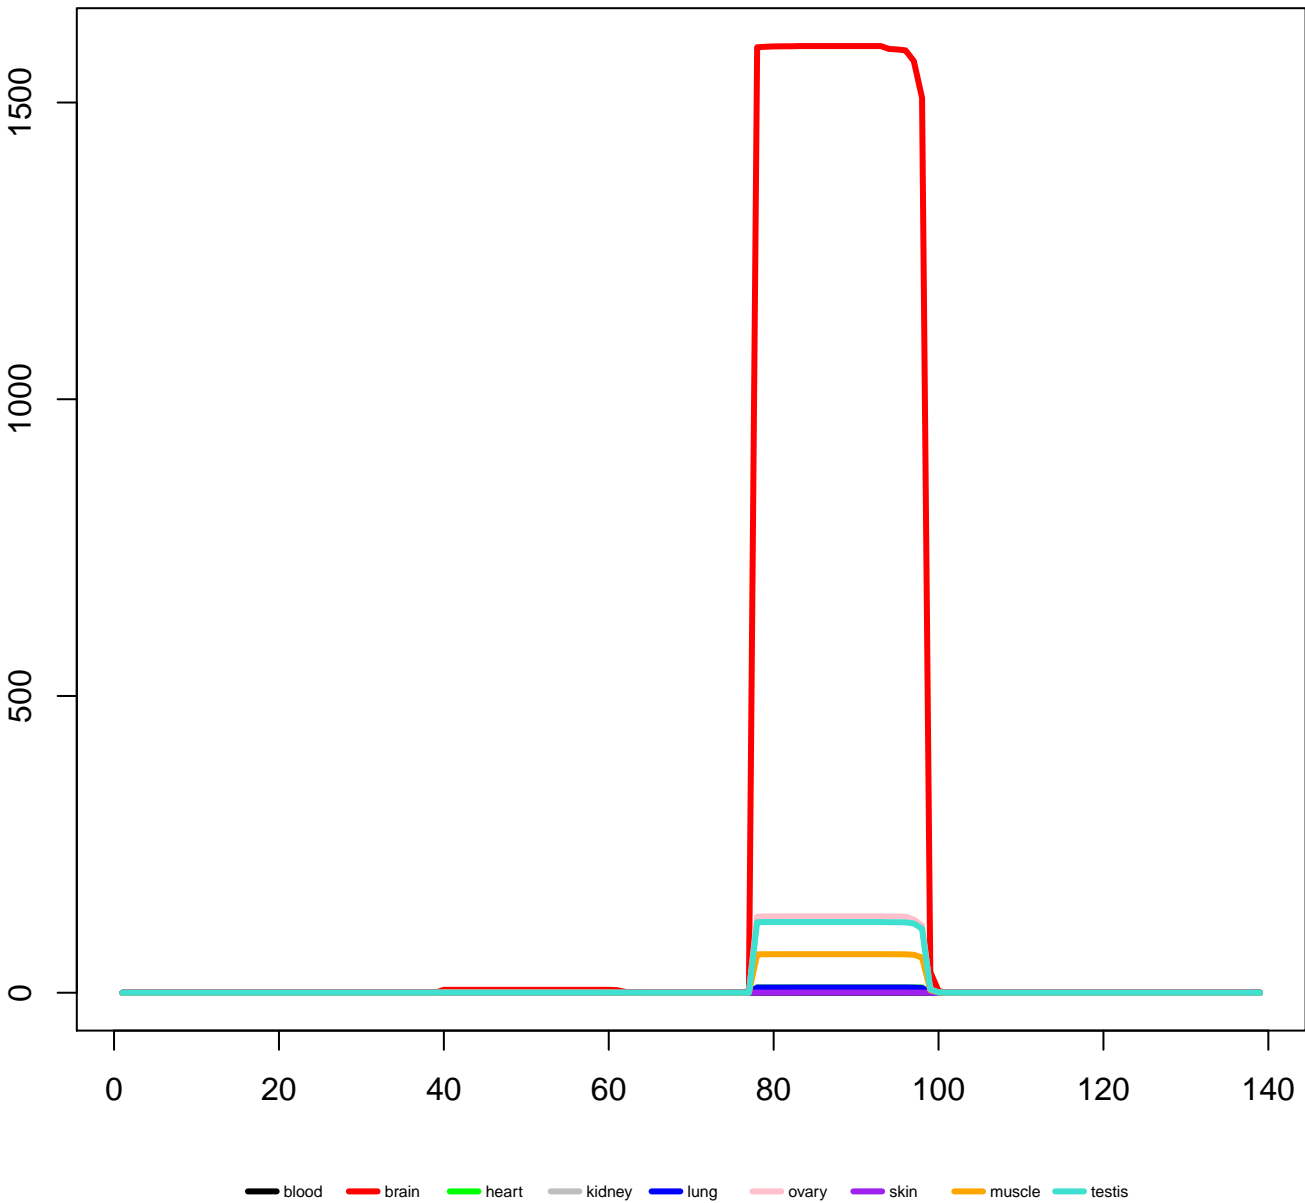

# 8\_69277656-69277744(+)\_cfa-mir-544\_high

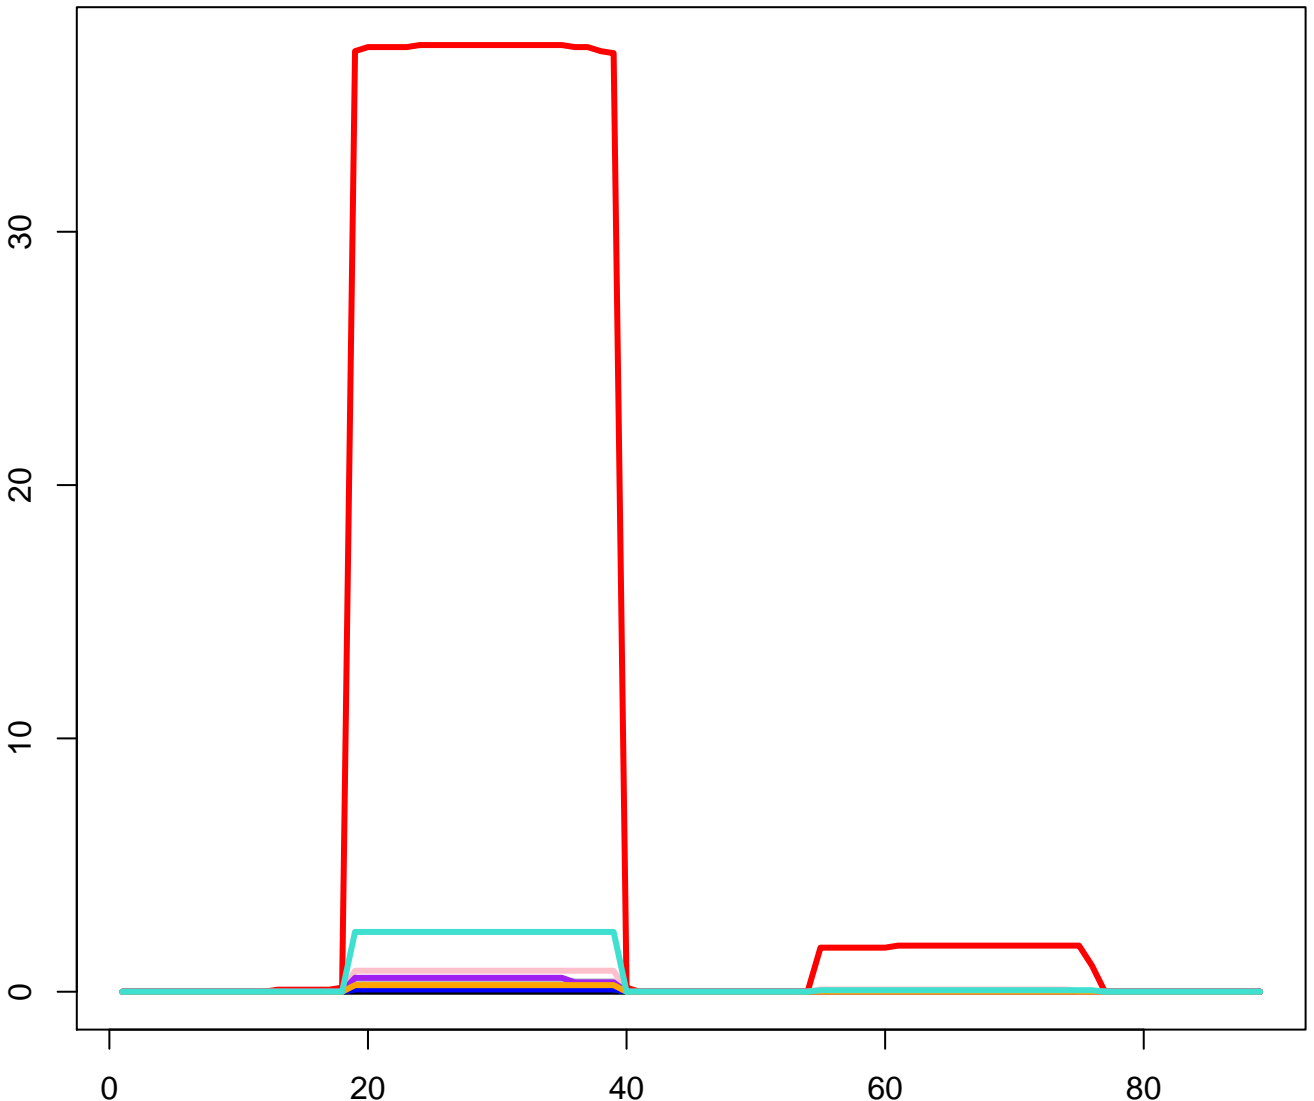

— blood — brain — heart — kidney — lung — ovary — skin — muscle — testis







# 8\_69283123-69283179(+)\_cfa-mir-382\_high

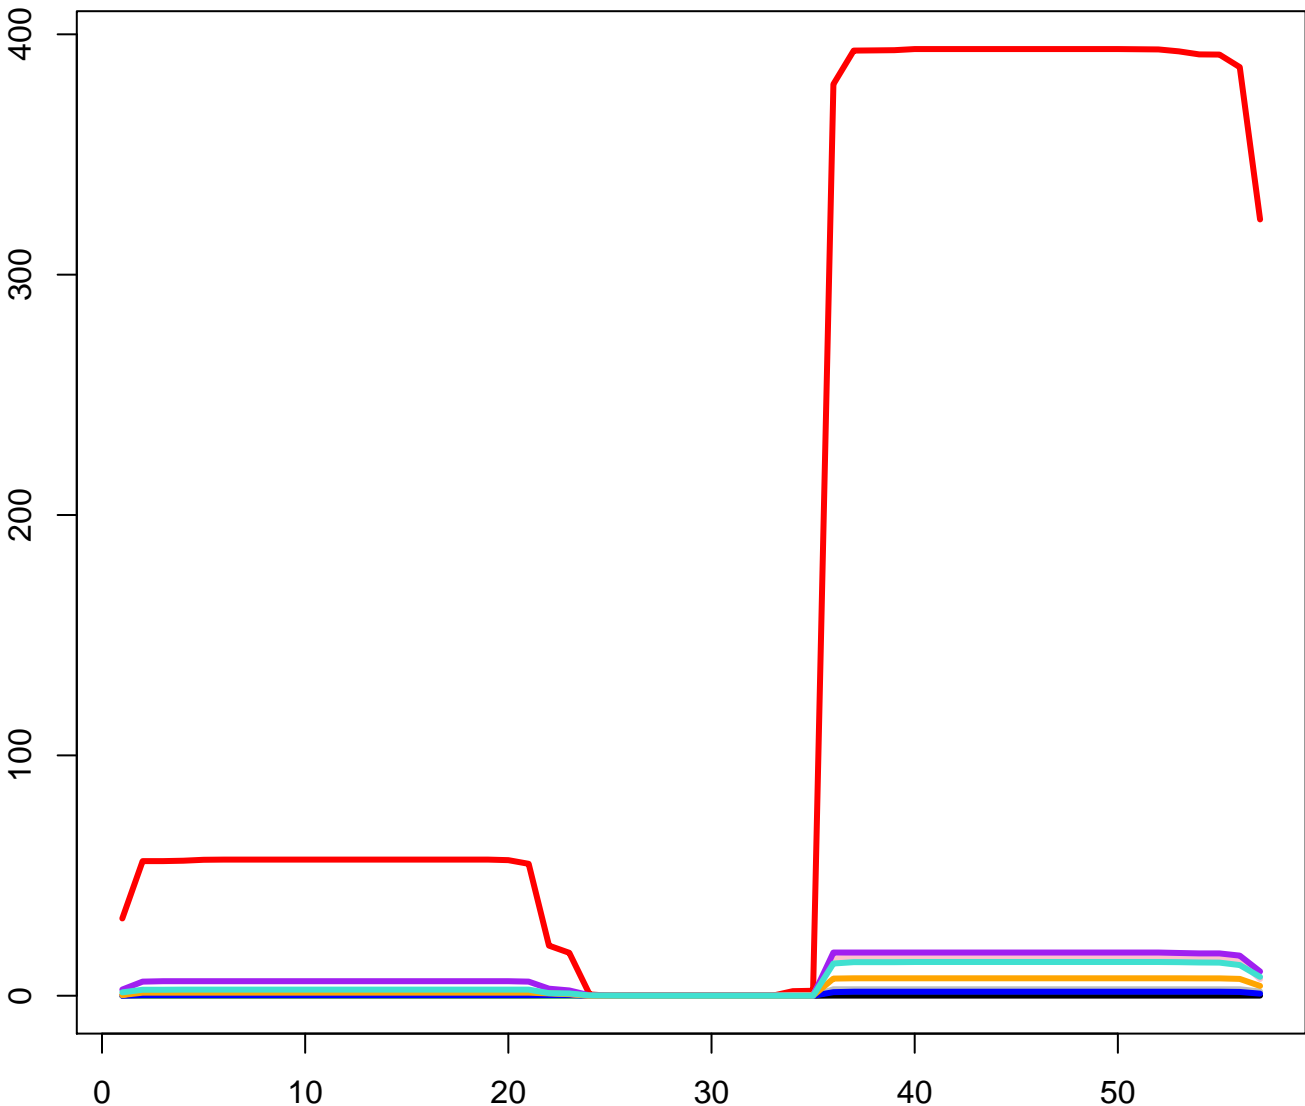

blood brain heart kidney lung ovary skin muscle testis







# 8\_69284239-69284297(+)\_cfa-mir-485\_high

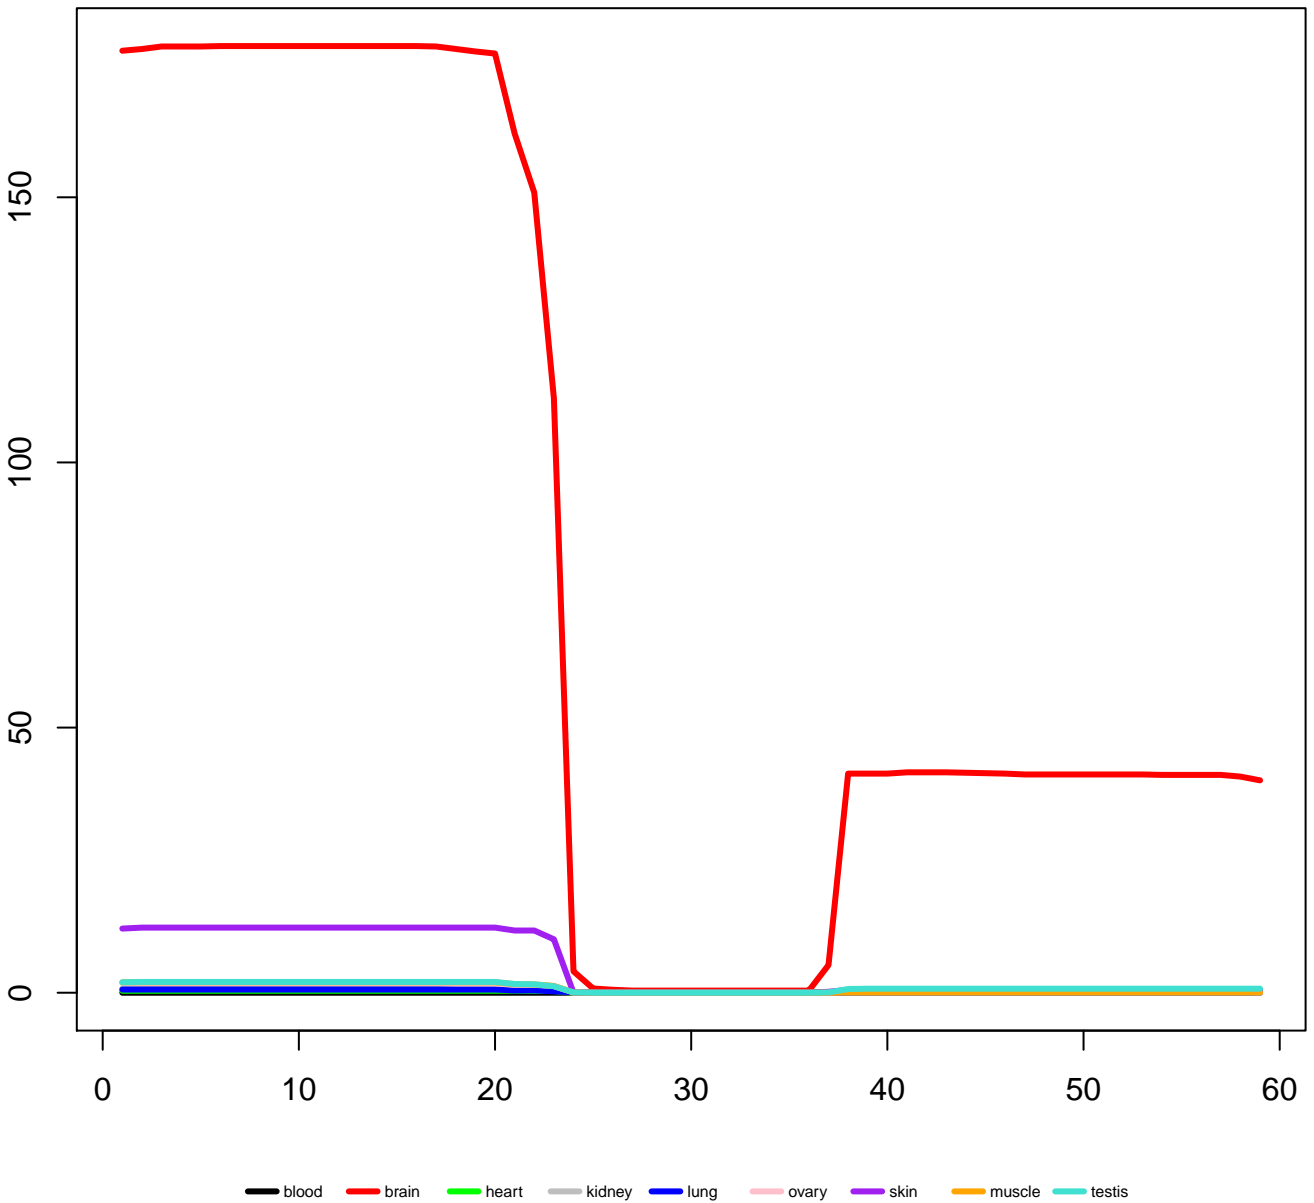

# 8\_69285041-69285101(+)\_mir-323b\_high

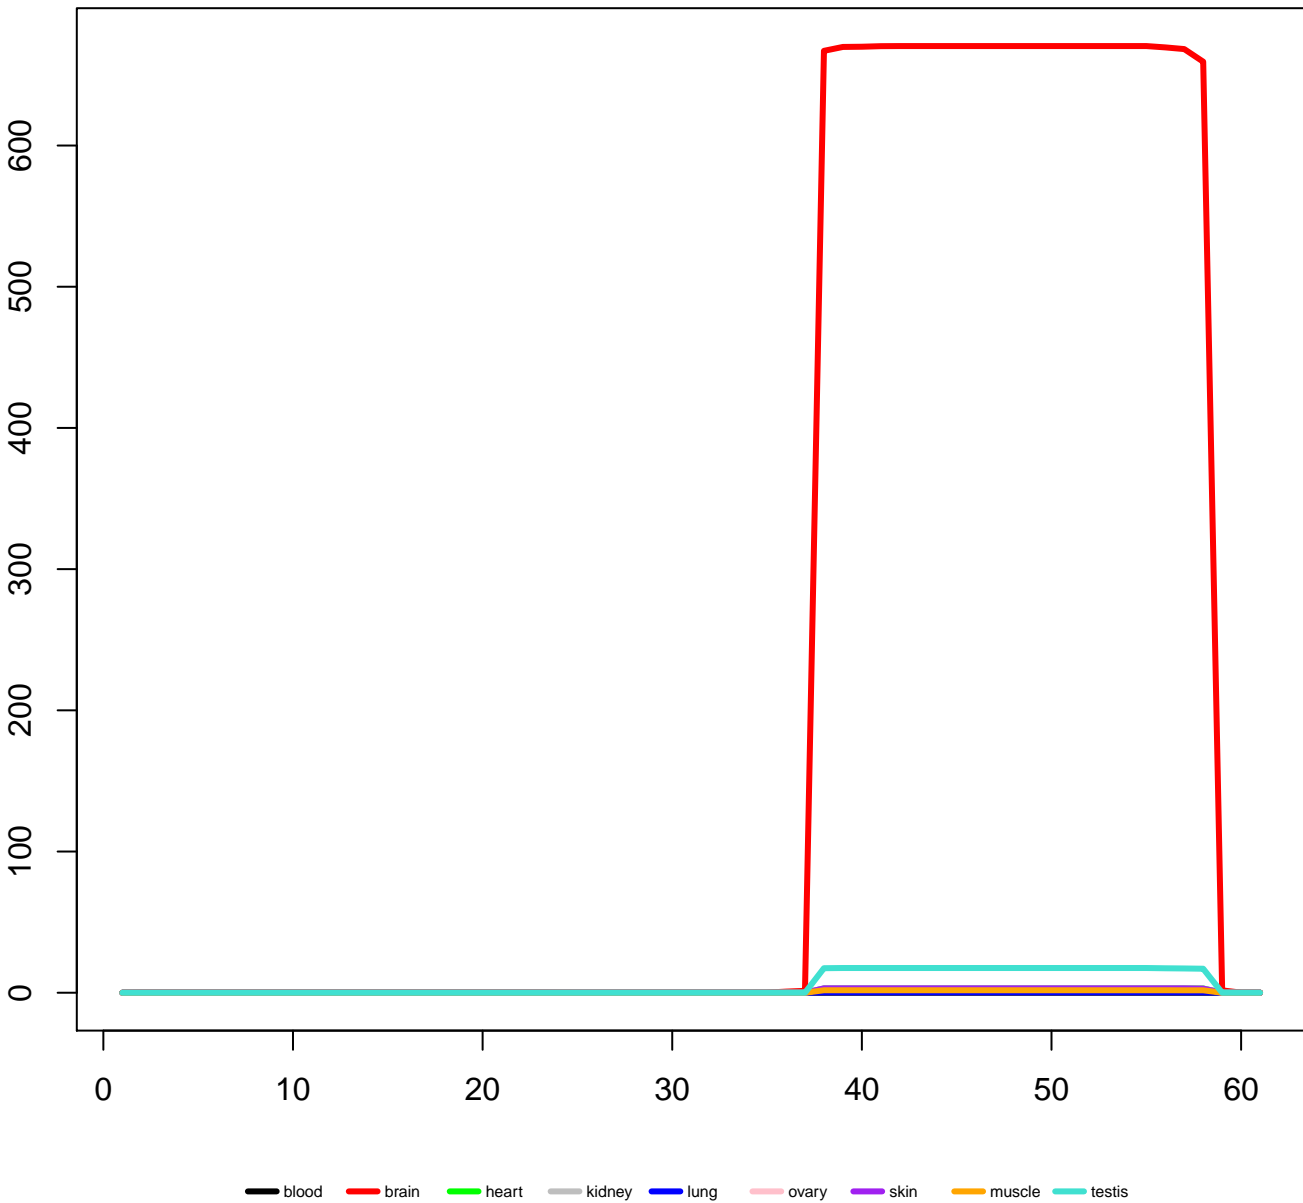

# 8\_69289410-69289507(+)\_cfa-mir-496\_high

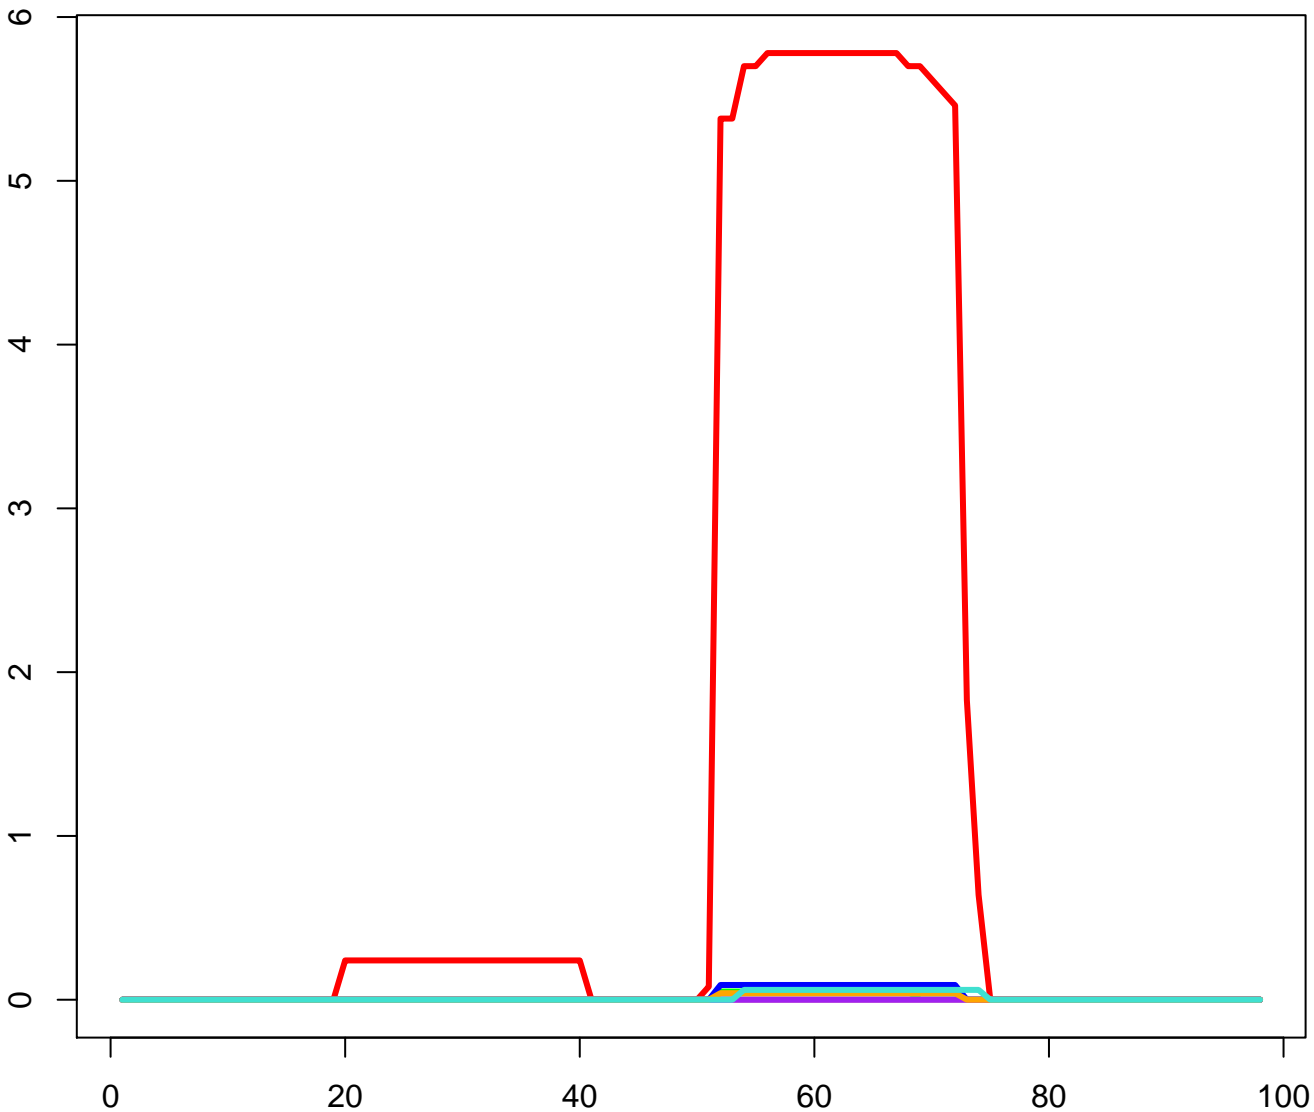

— blood — brain — heart — kidney — lung — ovary — skin — muscle — testis



# 8\_69292811-69292890(+)\_mir-541\_low

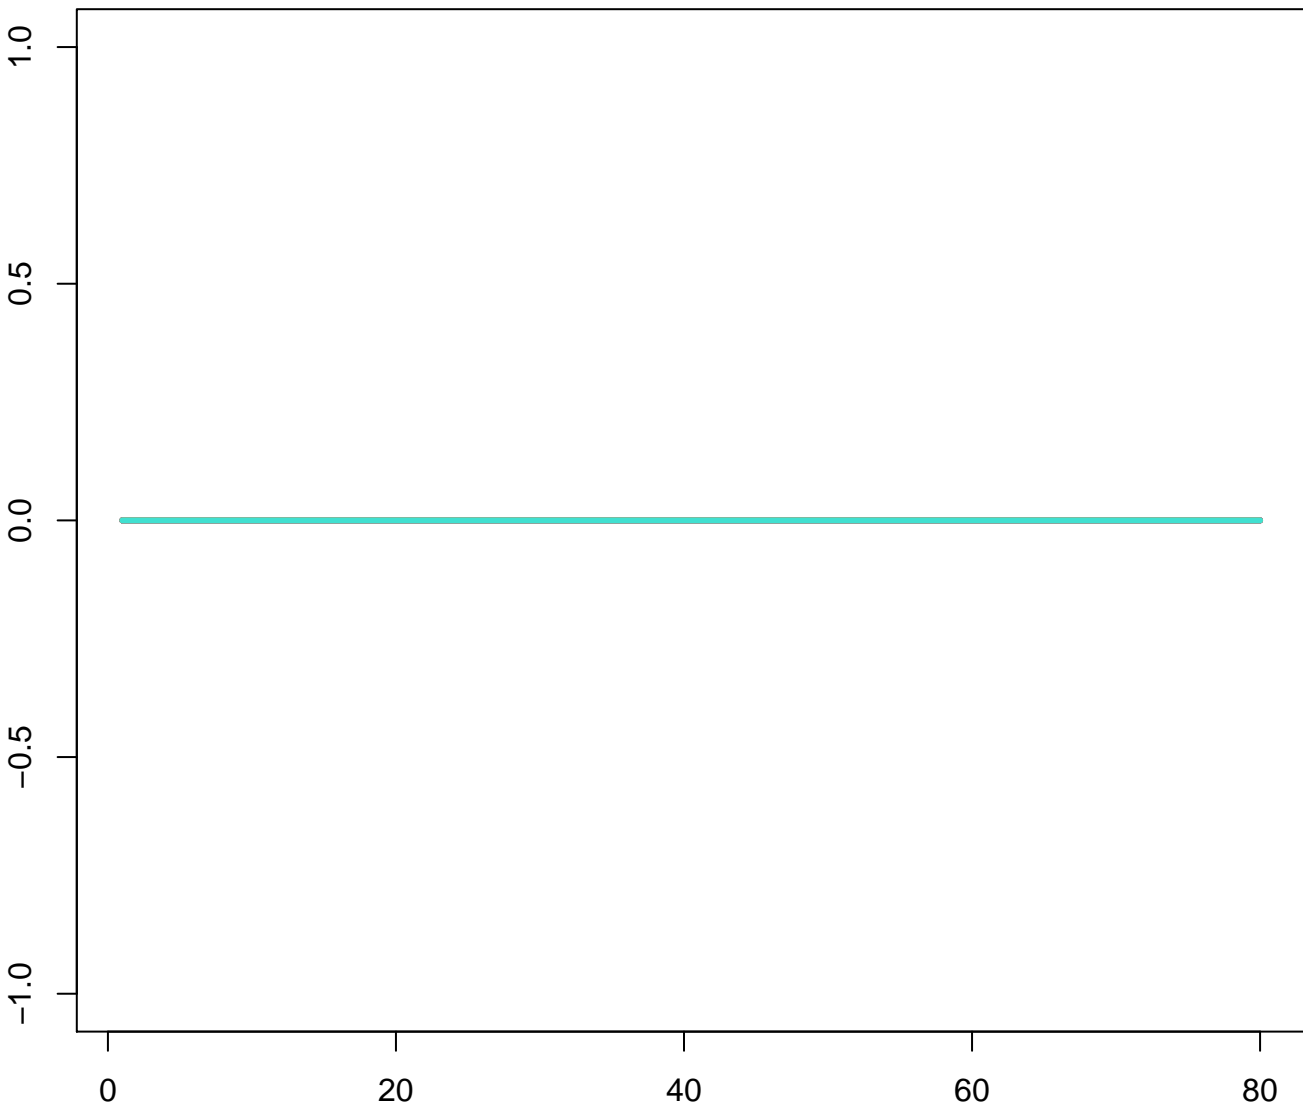

blood brain heart kidney lung ovary skin muscle testis

# 8\_69293782-69293835(+)\_cfa-mir-409\_high

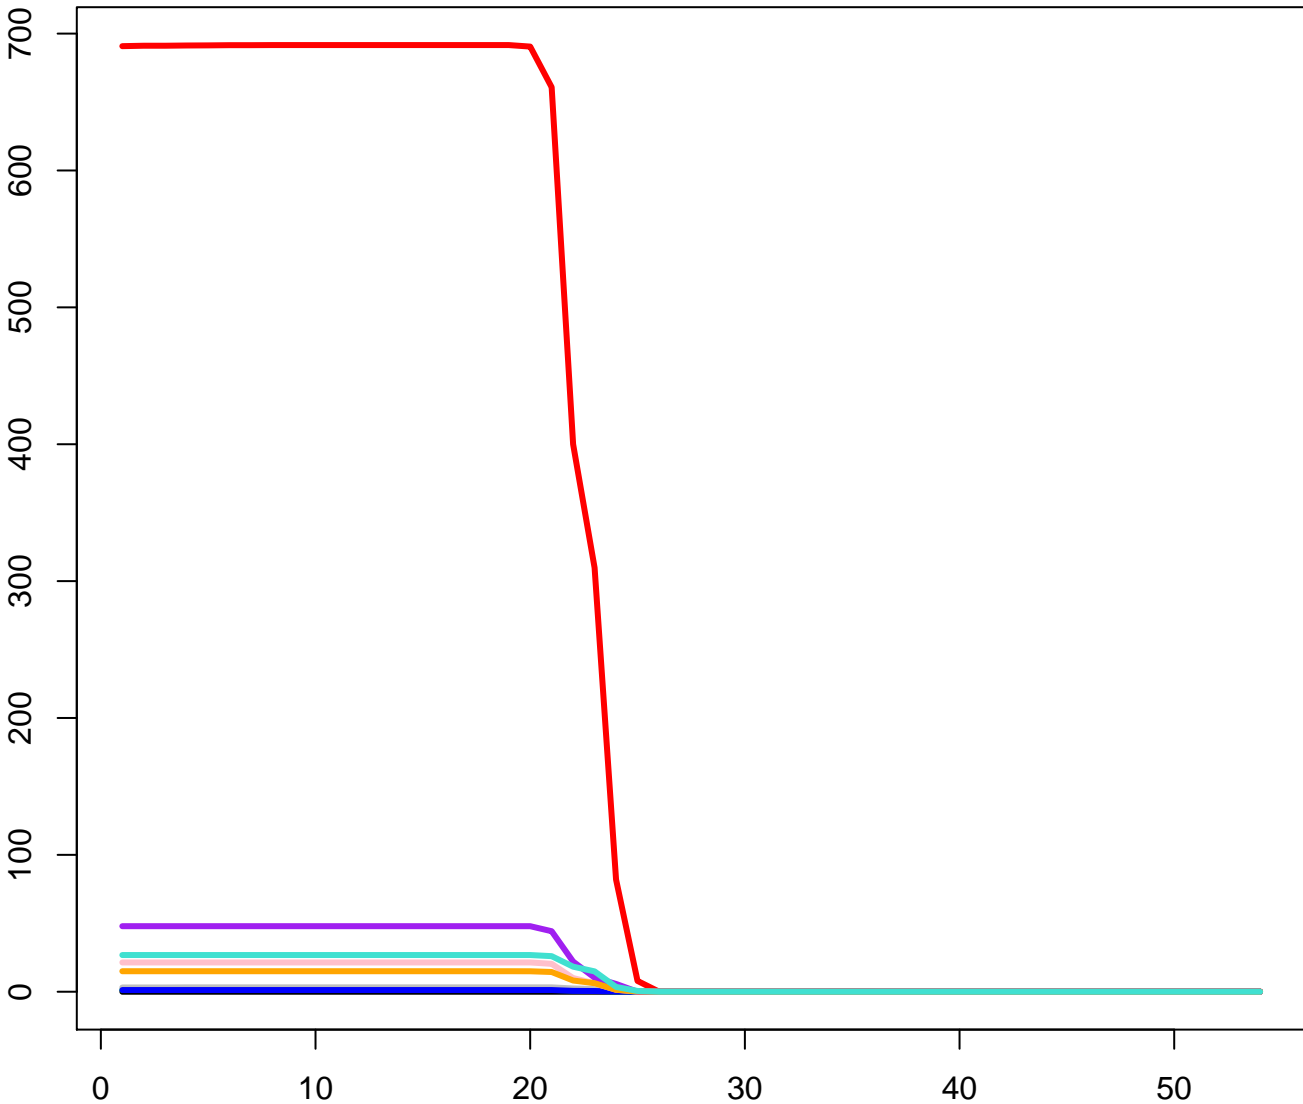

— blood — brain — heart — kidney — lung — ovary — skin — muscle — testis



# 8\_69294073-69294128(+)\_cfa-mir-369\_high

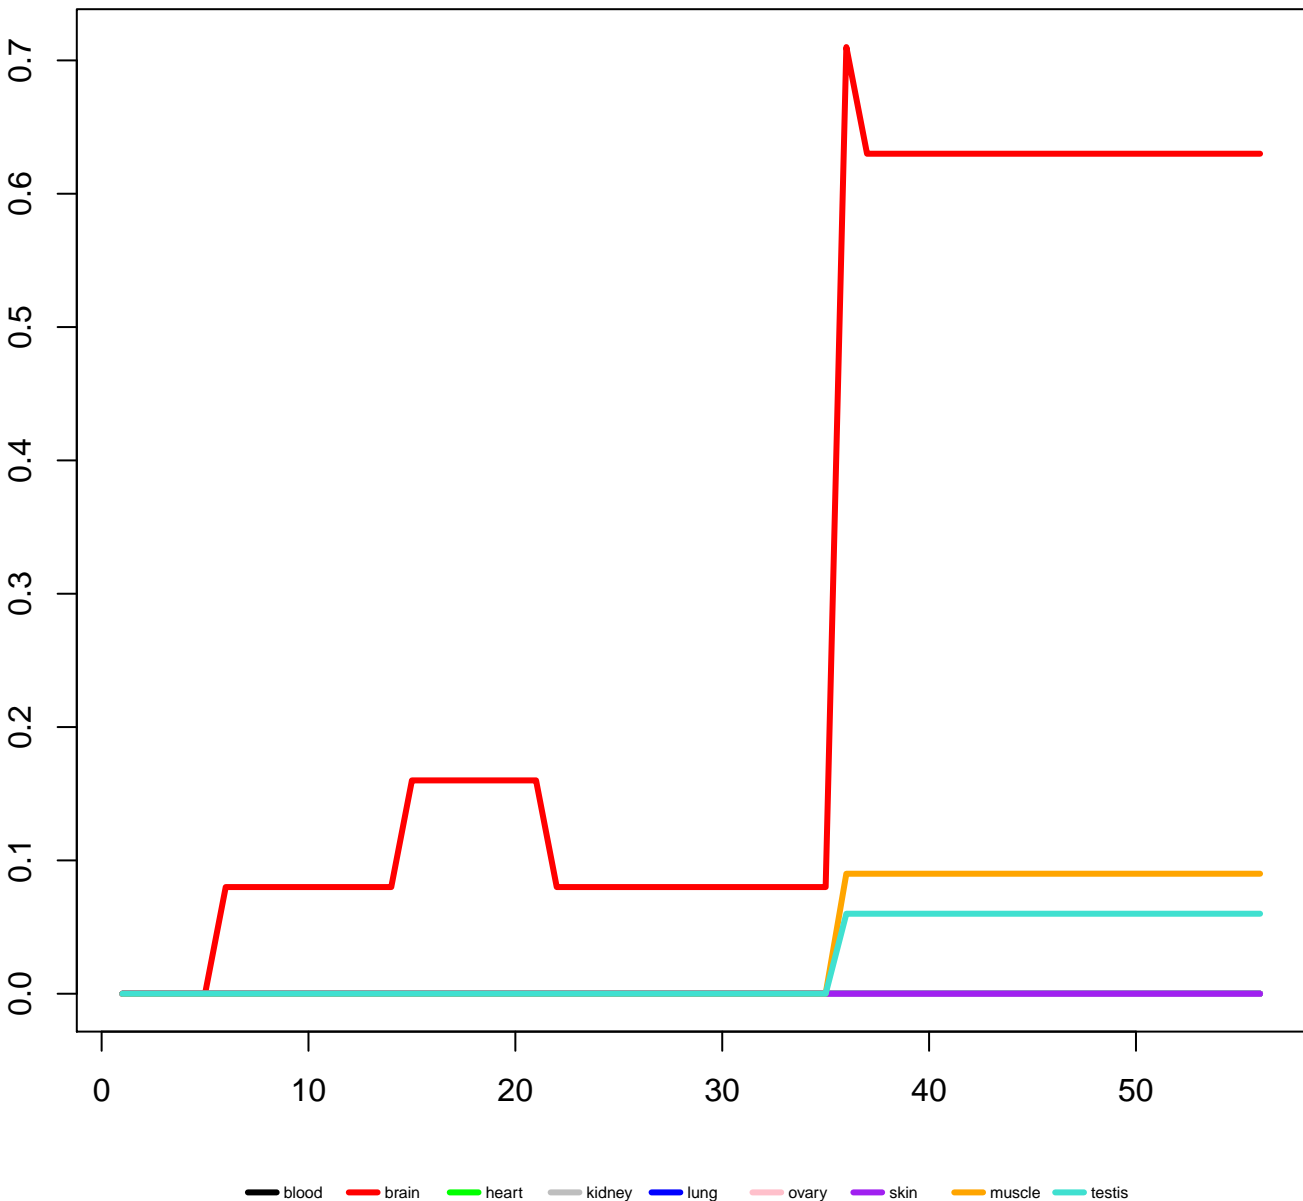

# 8\_69294377-69294432(+)\_cfa-mir-410\_high

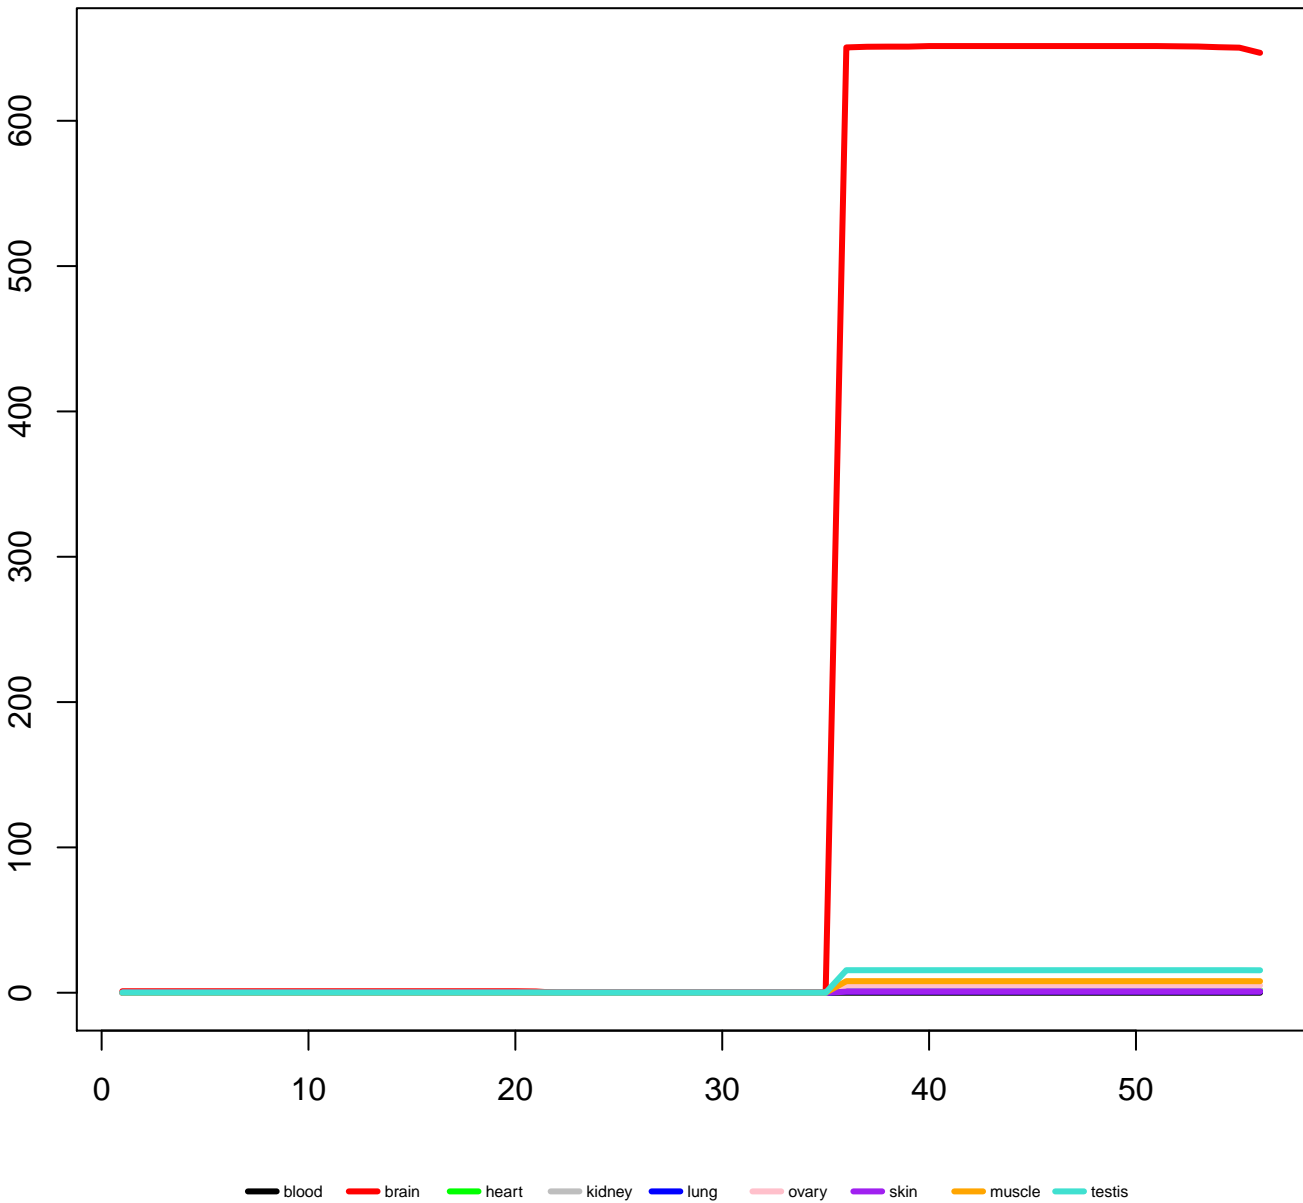

# 8\_69294874-69294949(+)\_mir-541\_low

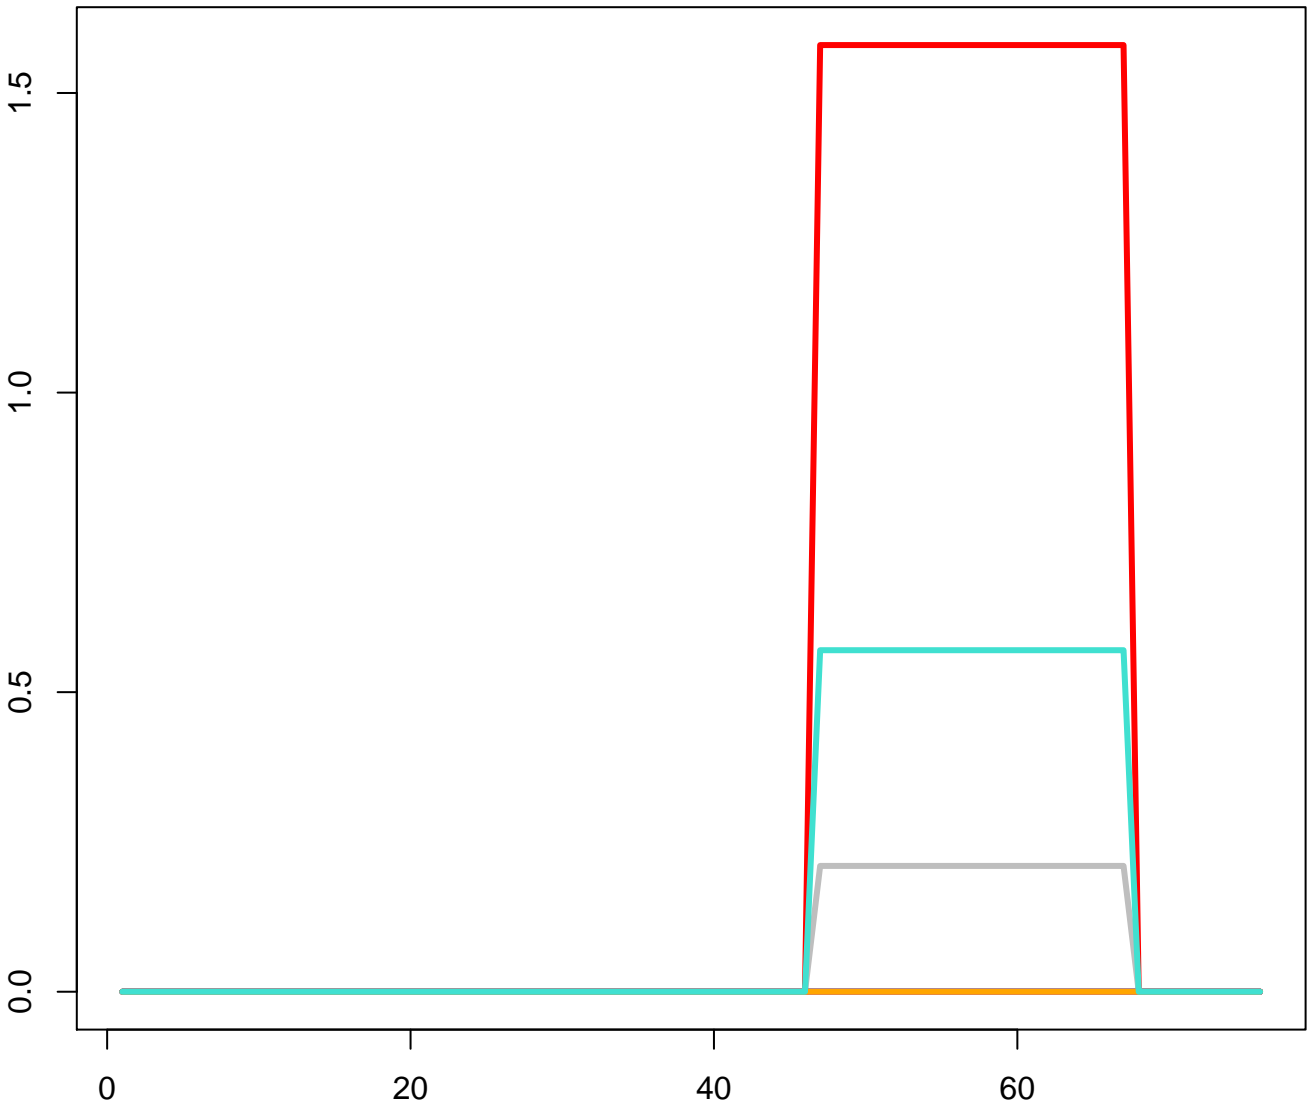

— blood — brain — heart — kidney — lung — ovary — skin — muscle — testis

# 8\_69295119-69295180(+)\_mir-656\_high

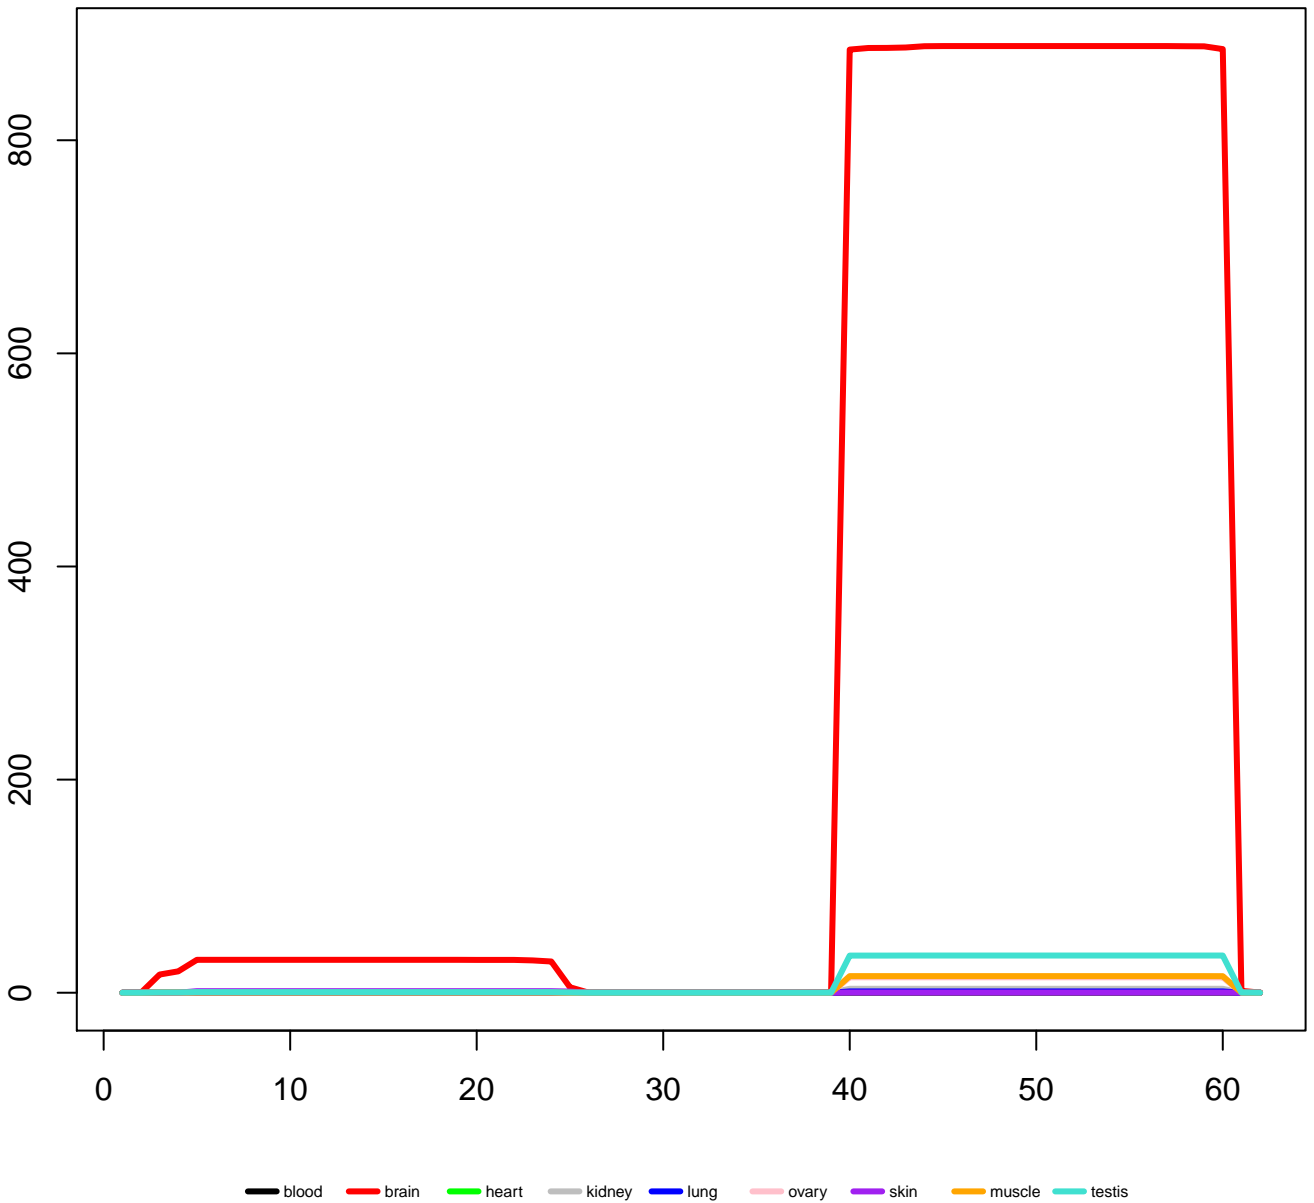

# 8\_70657032-70657176(-)\_cfa-mir-8882\_low



blood brain heart kidney lung ovary skin muscle testis











# 9\_3776763-3776877(-)\_cfa-mir-6516\_high

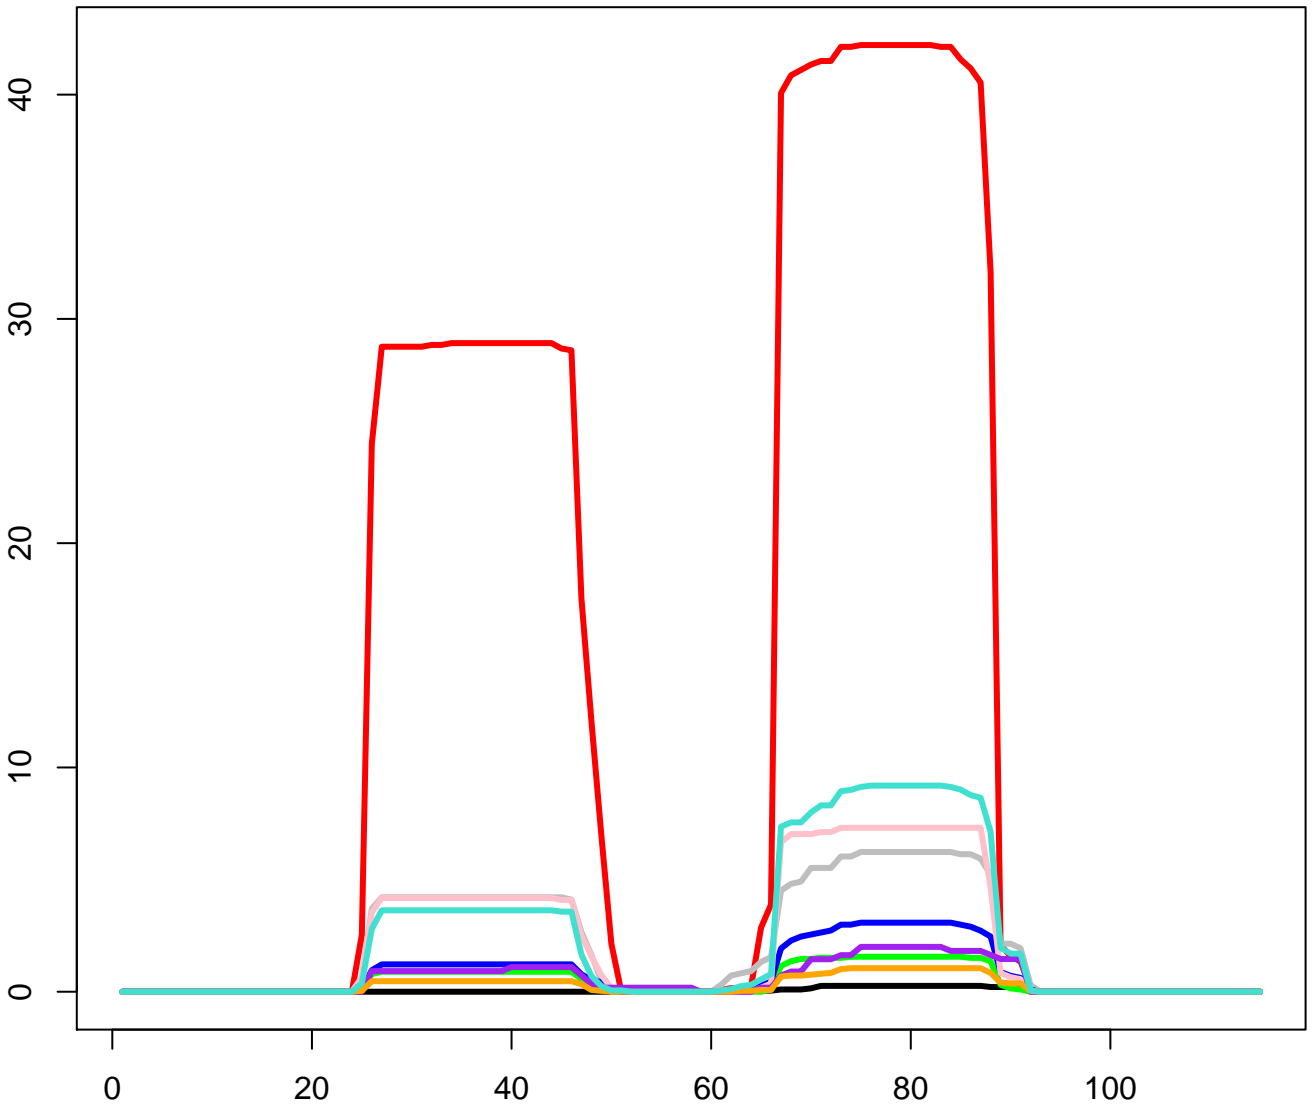

— blood — brain — heart — kidney — lung — ovary — skin — muscle — testis

# 9\_4378704-4378848(+)\_cfa-mir-8886\_low

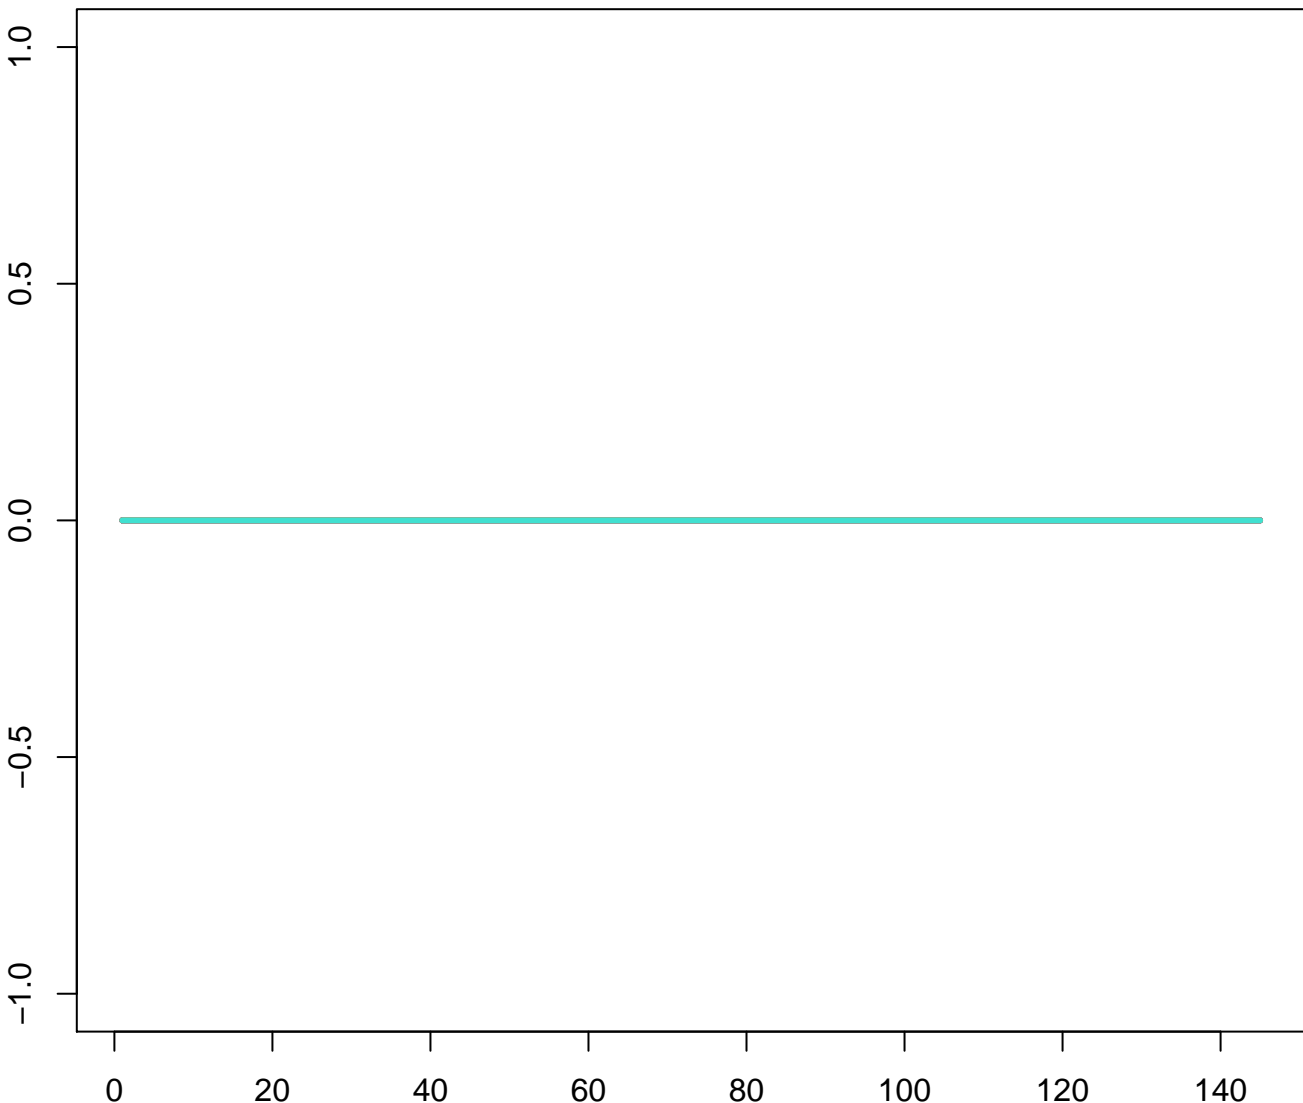

blood brain heart kidney lung ovary skin muscle testis

# 9\_9429575-9429719(+)\_cfa-mir-8885\_low

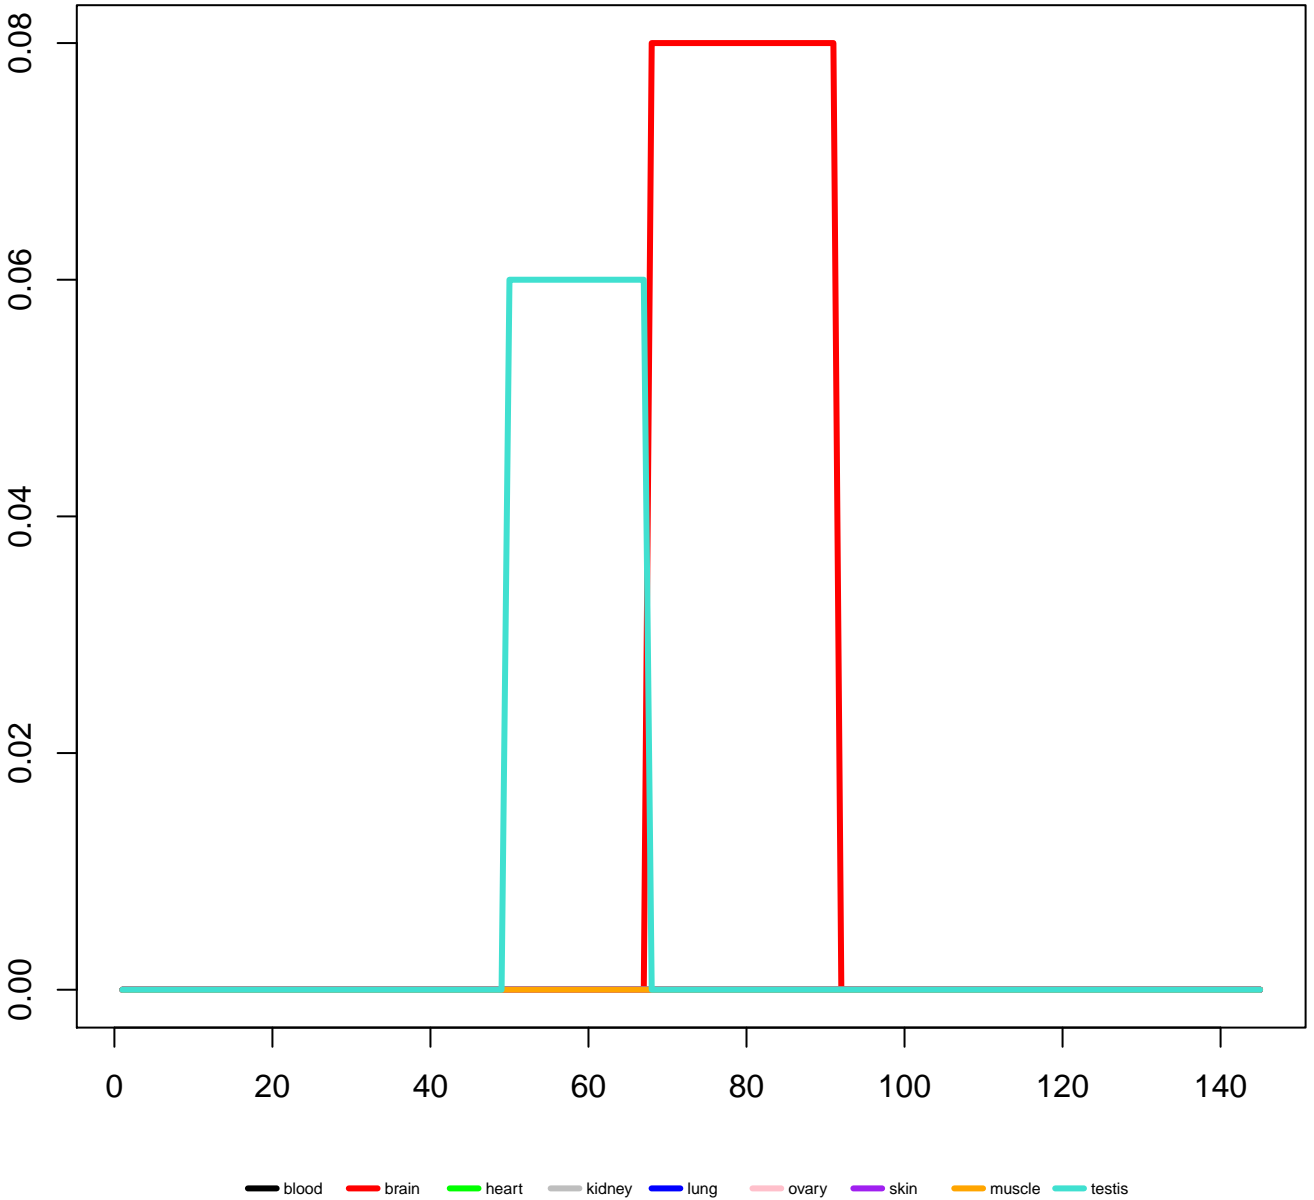

# 9\_10288946-10289040(-)\_cfa-mir-8841-1\_low

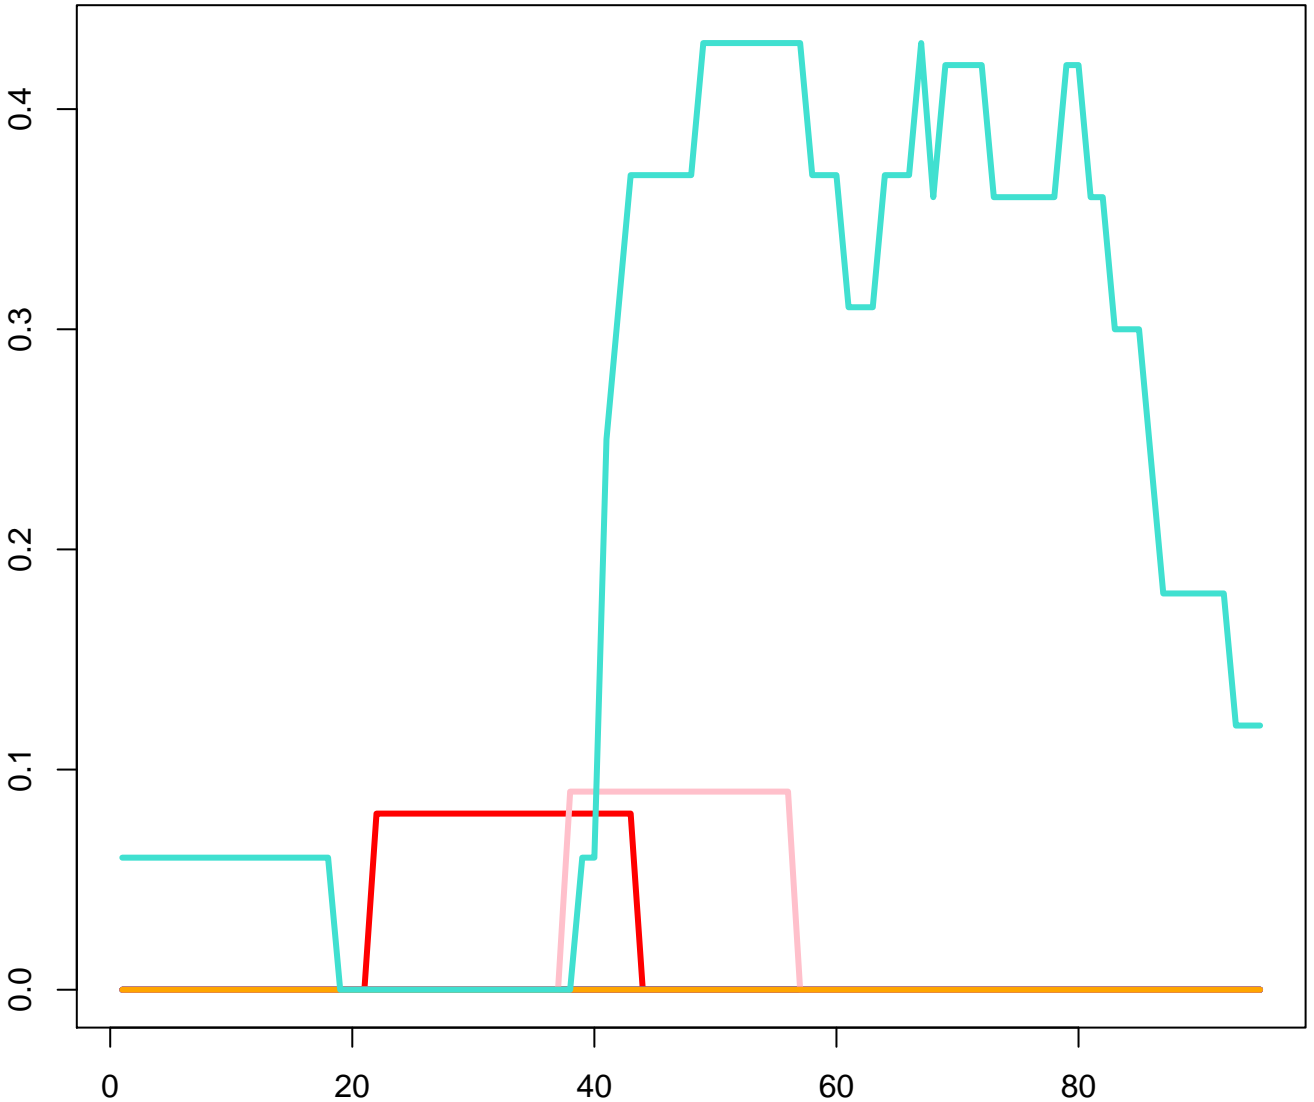

— blood — brain — heart — kidney — lung — ovary — skin — muscle — testis



# 9\_12302297-12302397(-)\_mir-5047\_low

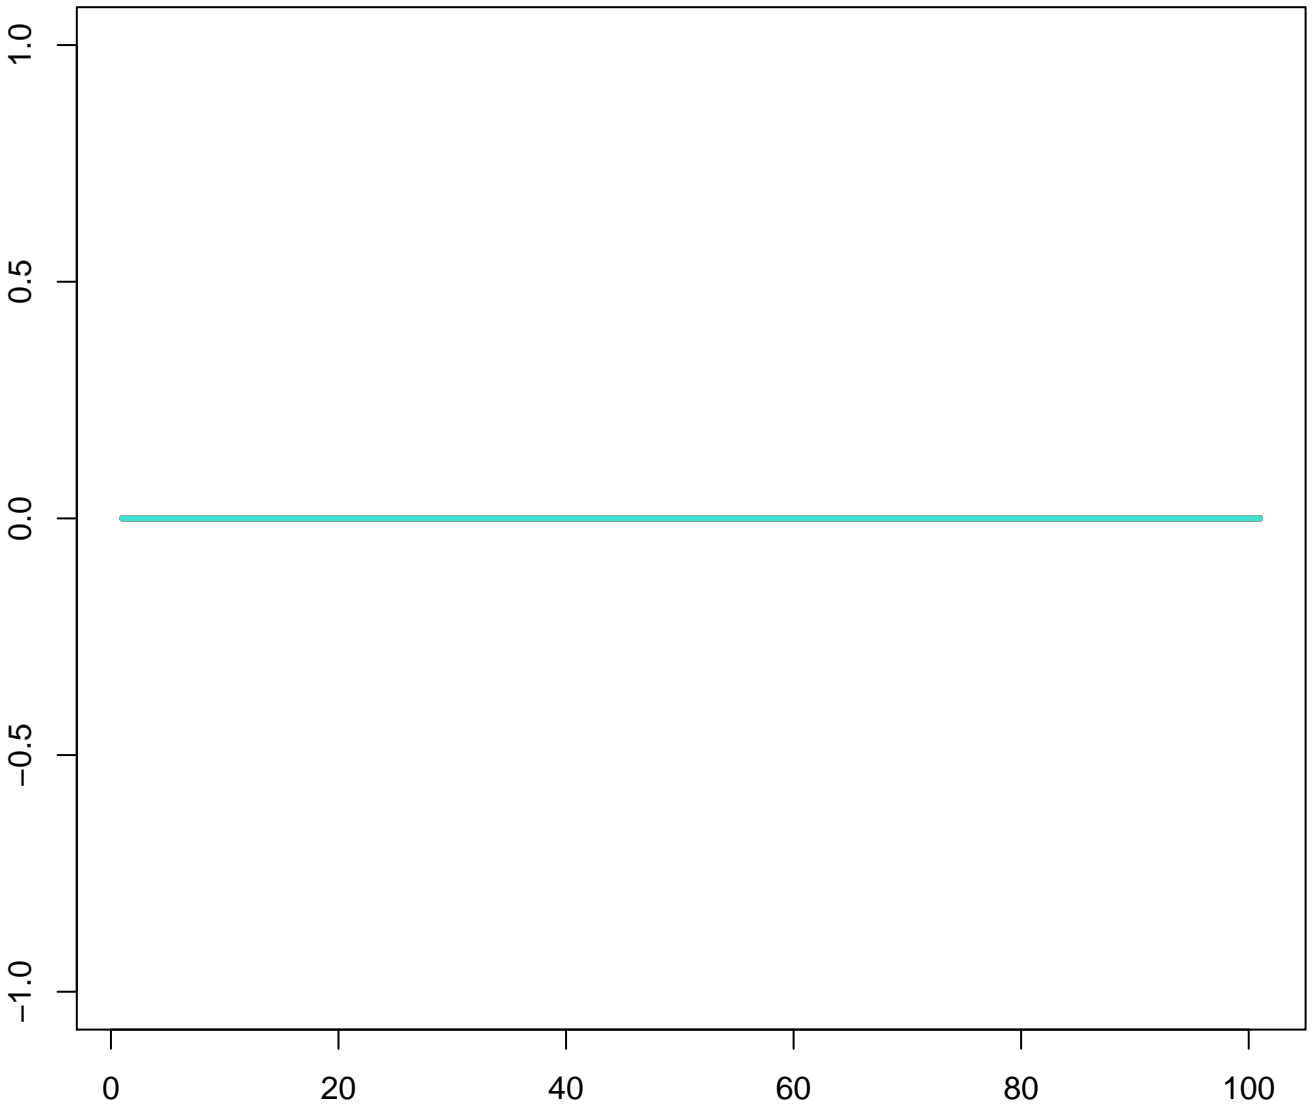

— blood — brain — heart — kidney — lung — ovary — skin — muscle — testis

# 9\_12471995-12472086(-)\_mir-3141\_low

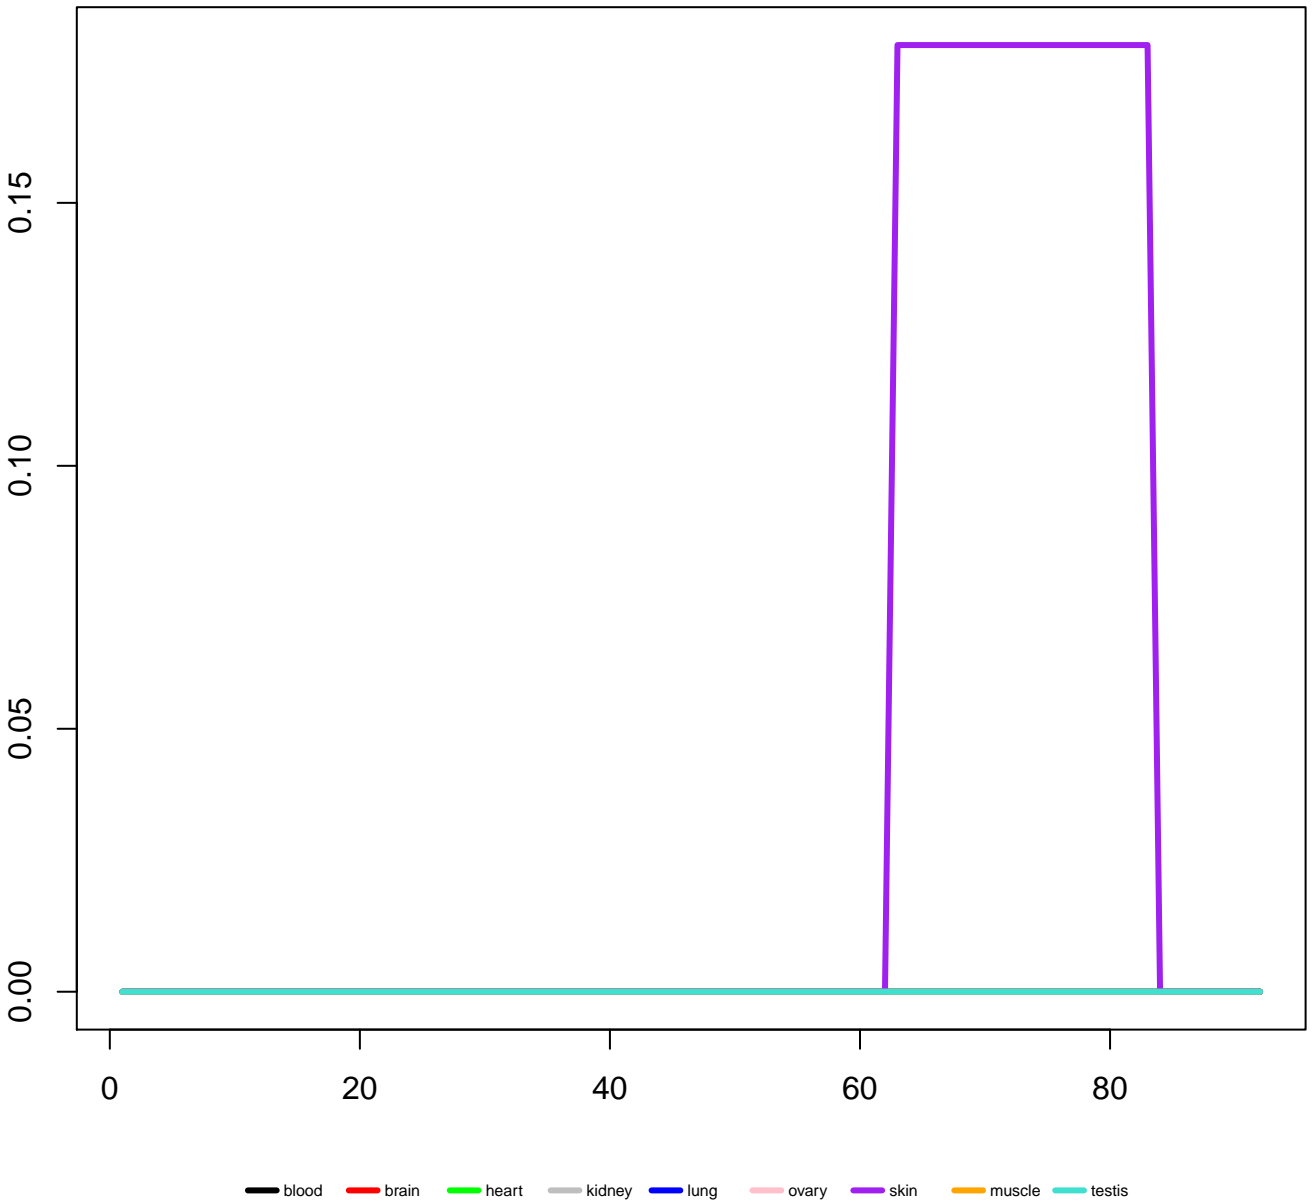



# 9\_17998769-17998862(+)\_mir-8841\_low

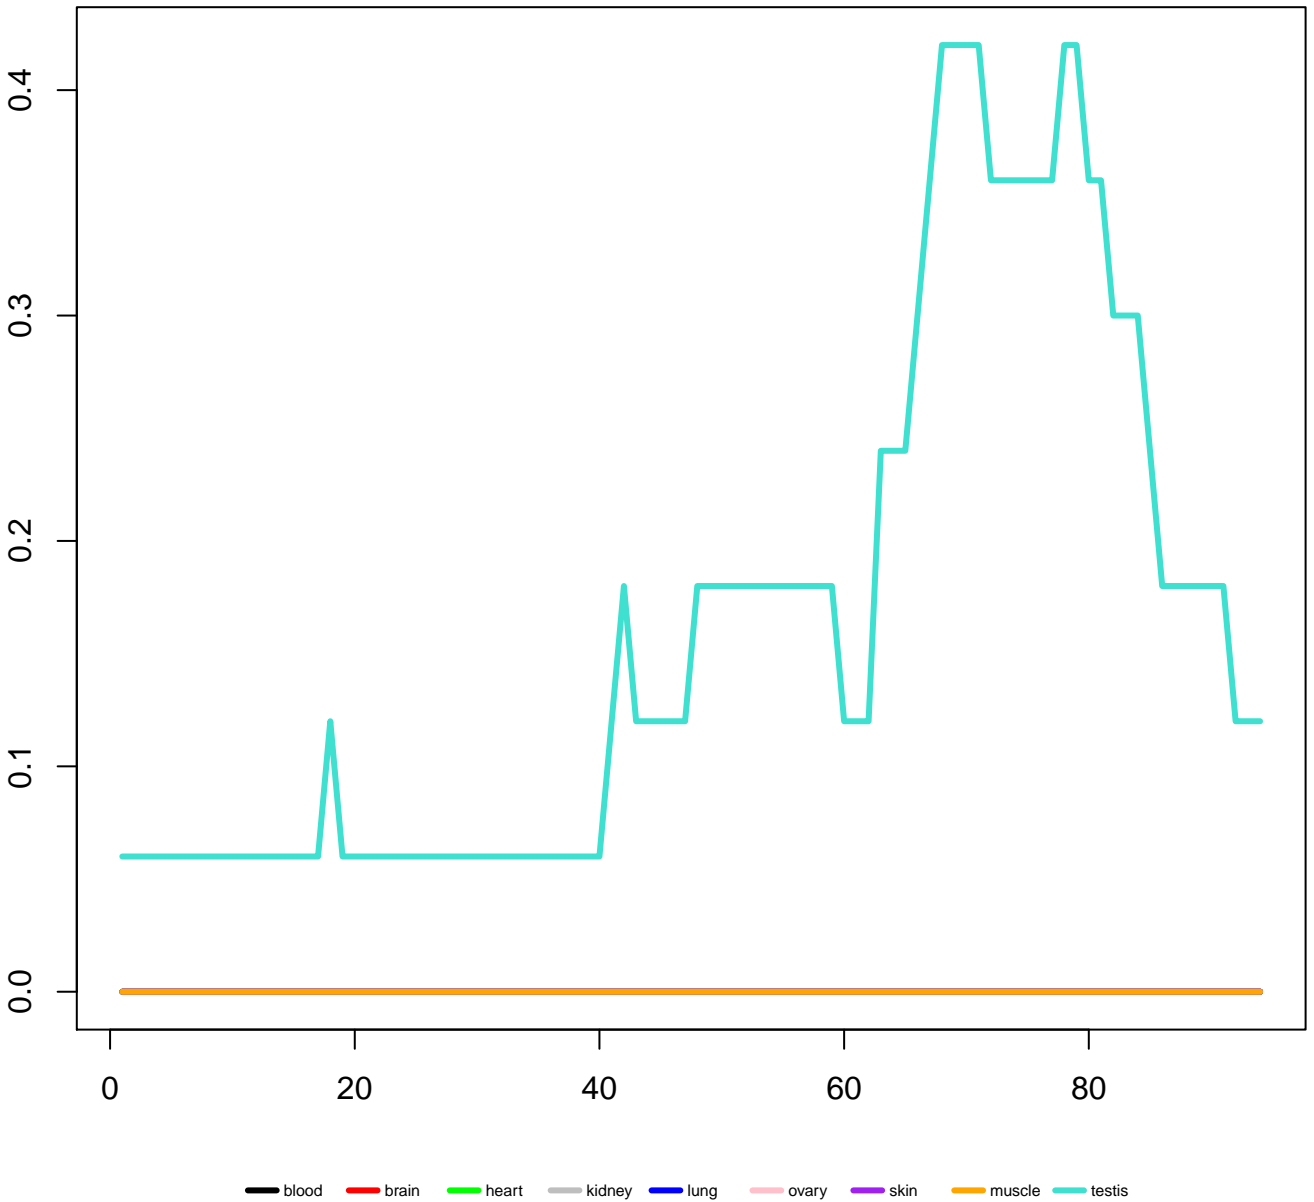



# 9\_19261101-19261192(+)\_mir-8101\_low

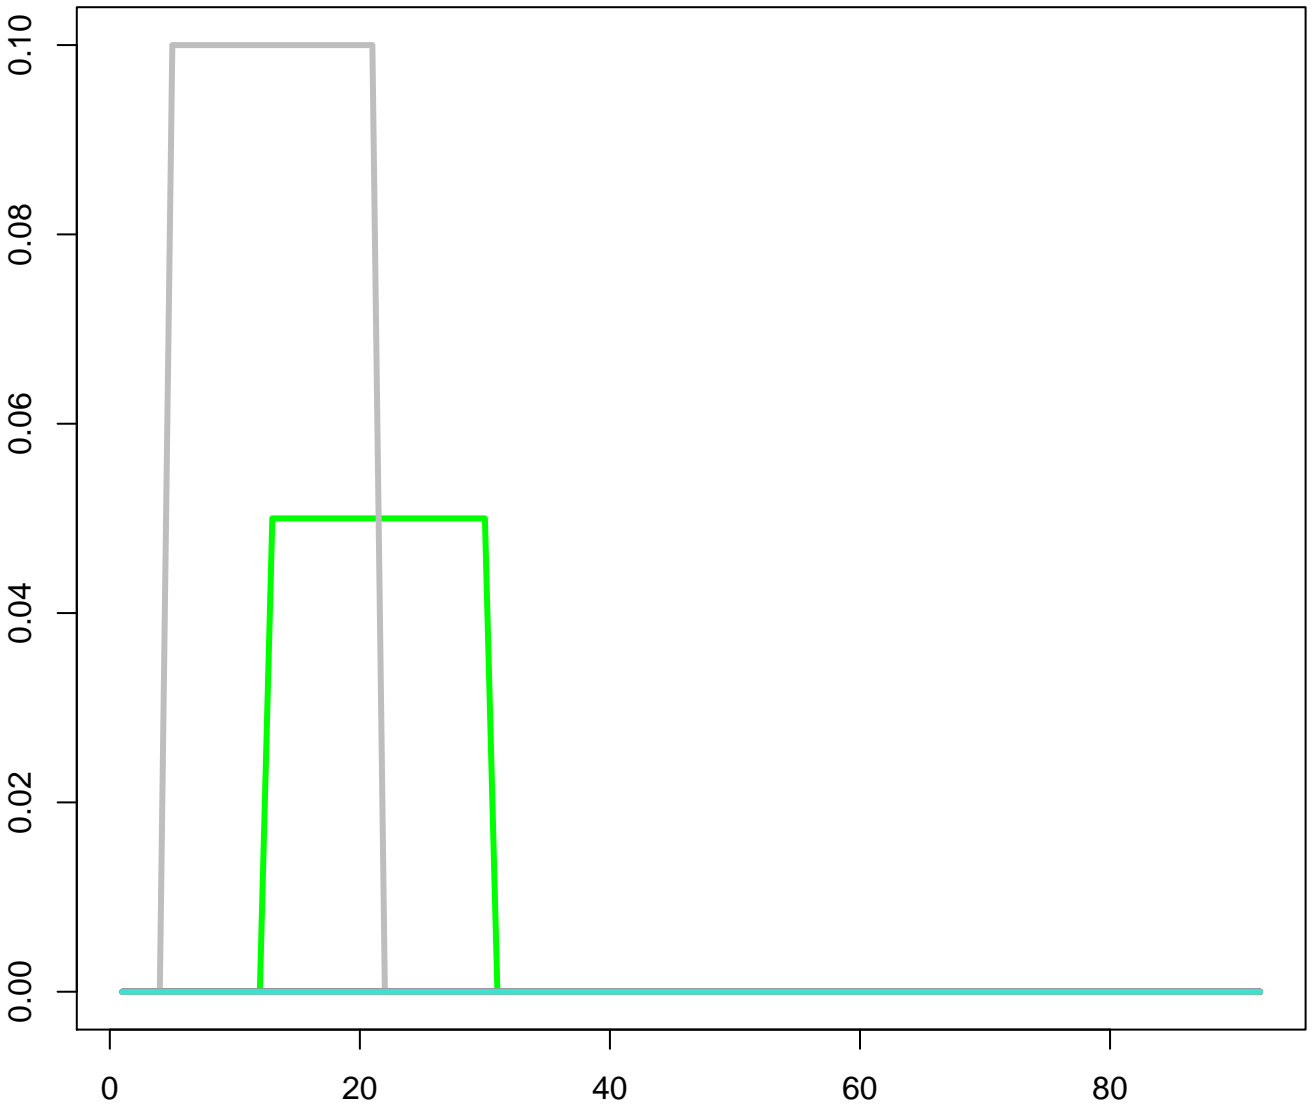

blood brain heart kidney lung ovary skin muscle testis

# 9\_20322763-20322830(-)\_mir-9788\_high

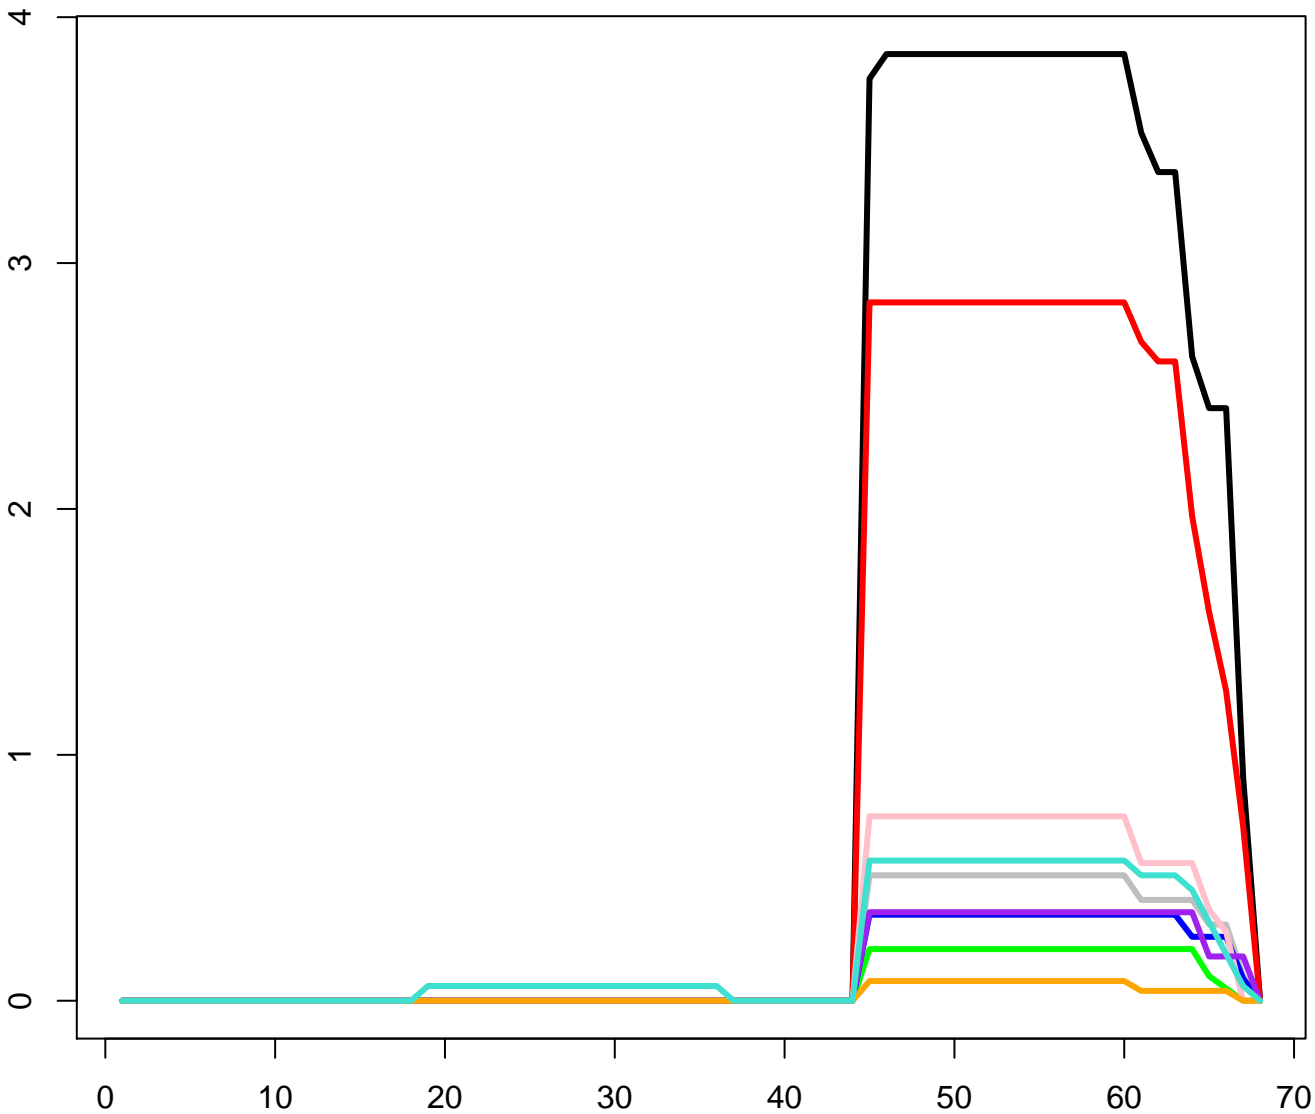

— blood — brain — heart — kidney — lung — ovary — skin — muscle — testis

# 9\_20359448-20359515(-)\_mir-9788\_high

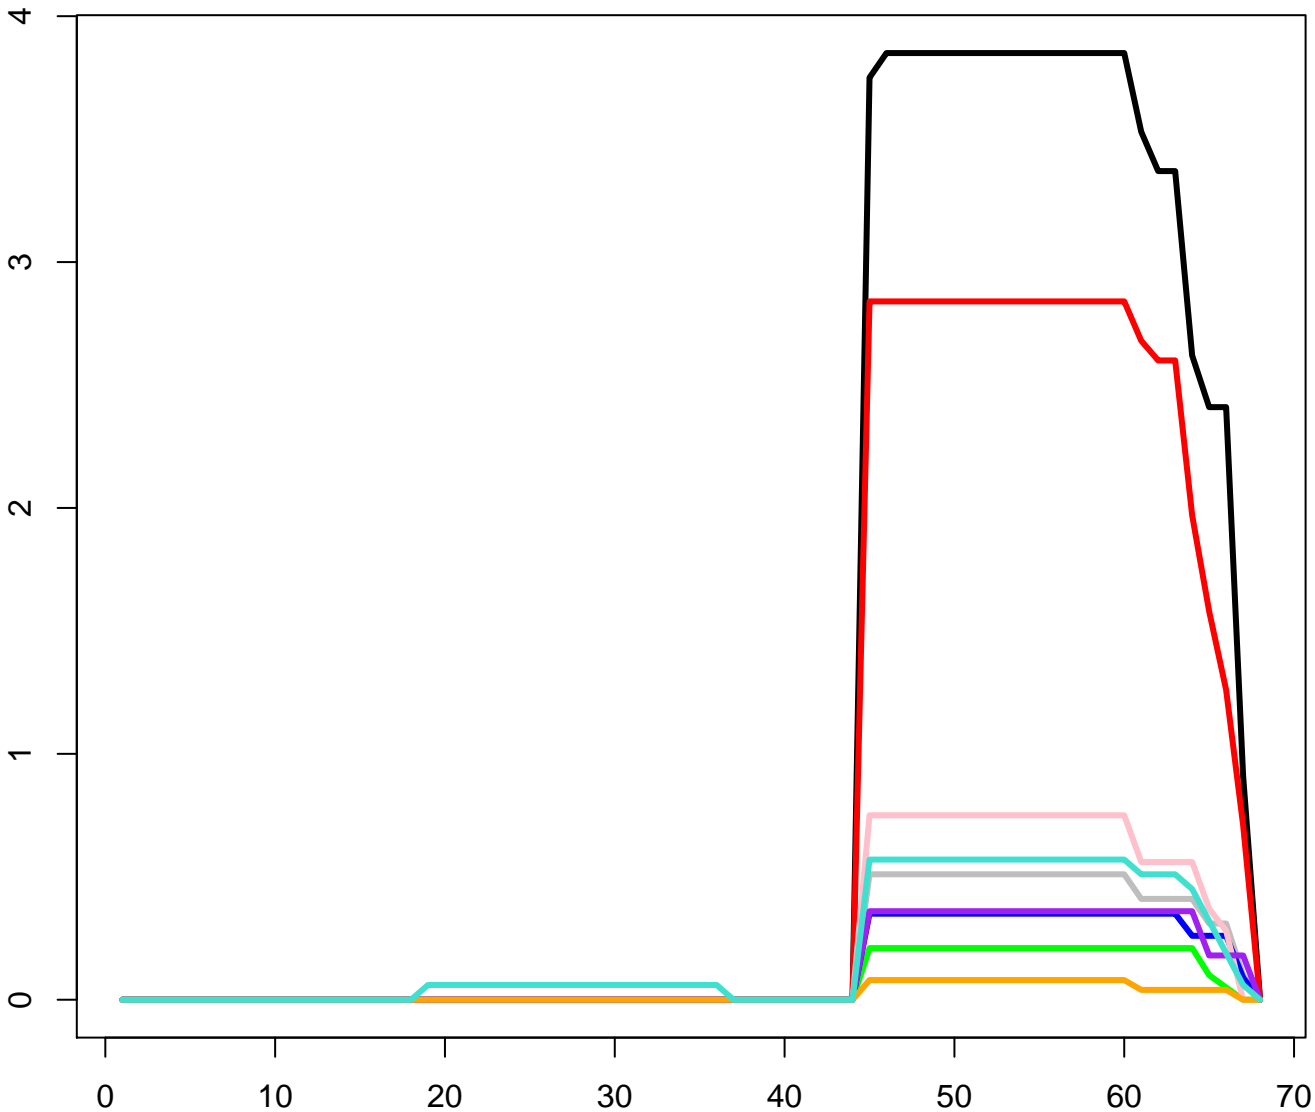

— blood — brain — heart — kidney — lung — ovary — skin — muscle — testis

# 9\_22156111-22156231(-)\_cfa-mir-888\_low

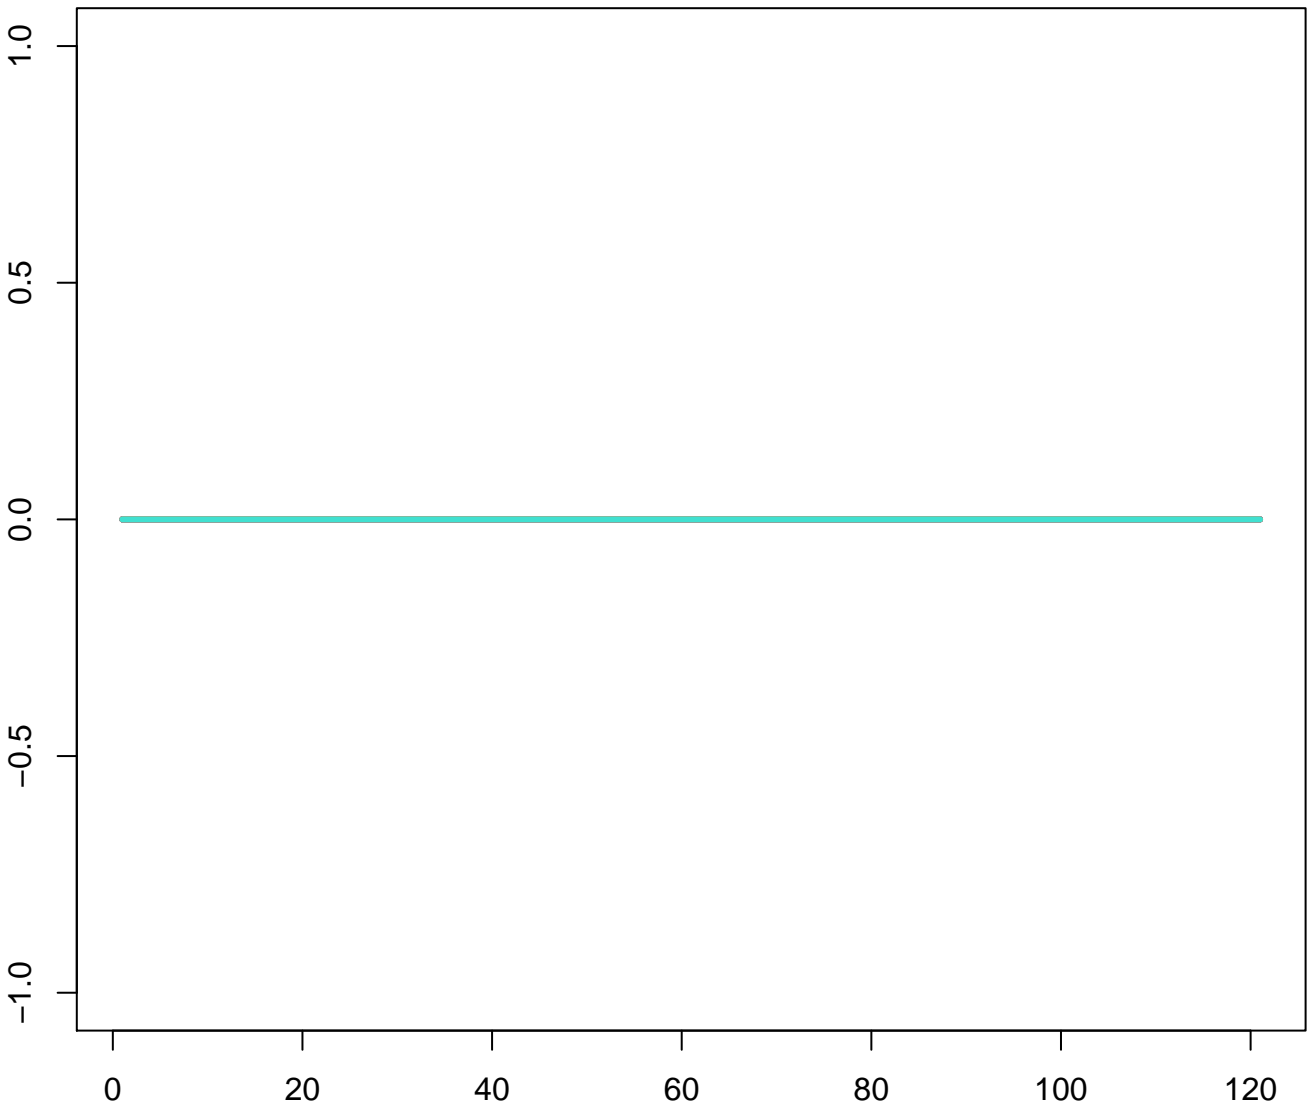

Legend: blood (black), brain (red), heart (green), kidney (grey), lung (blue), ovary (pink), skin (purple), muscle (orange), testis (cyan)

# 9\_24335161-24335219(-)\_cfa-mir-152\_high

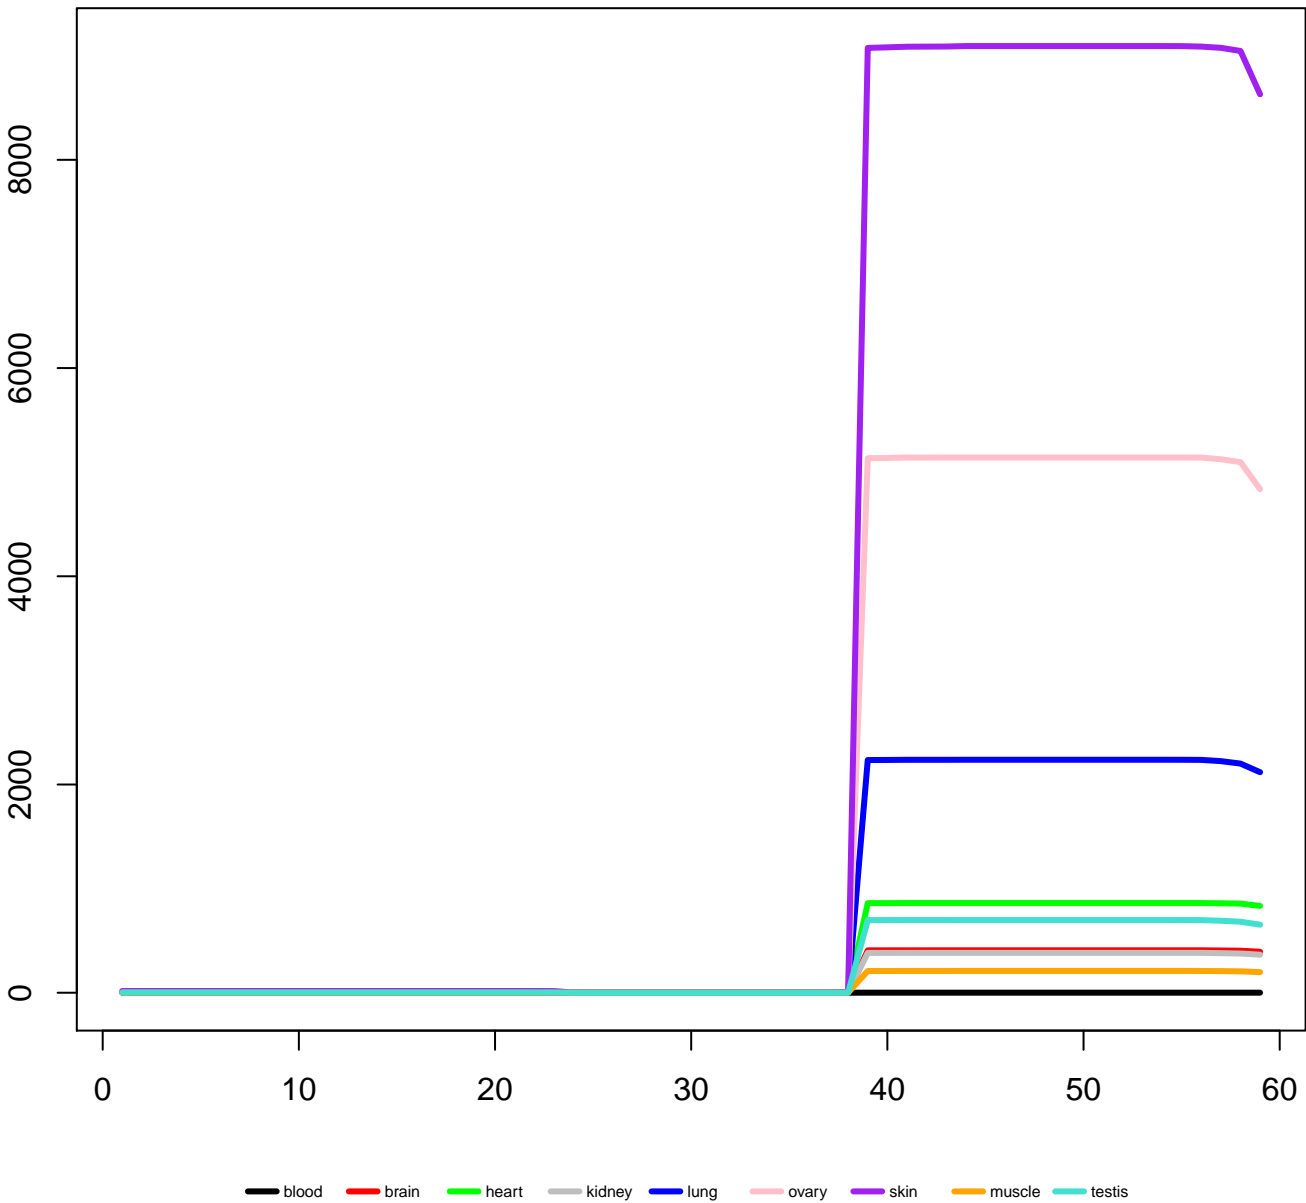

# 9\_24842171-24842233(-)\_cfa-mir-10a\_high

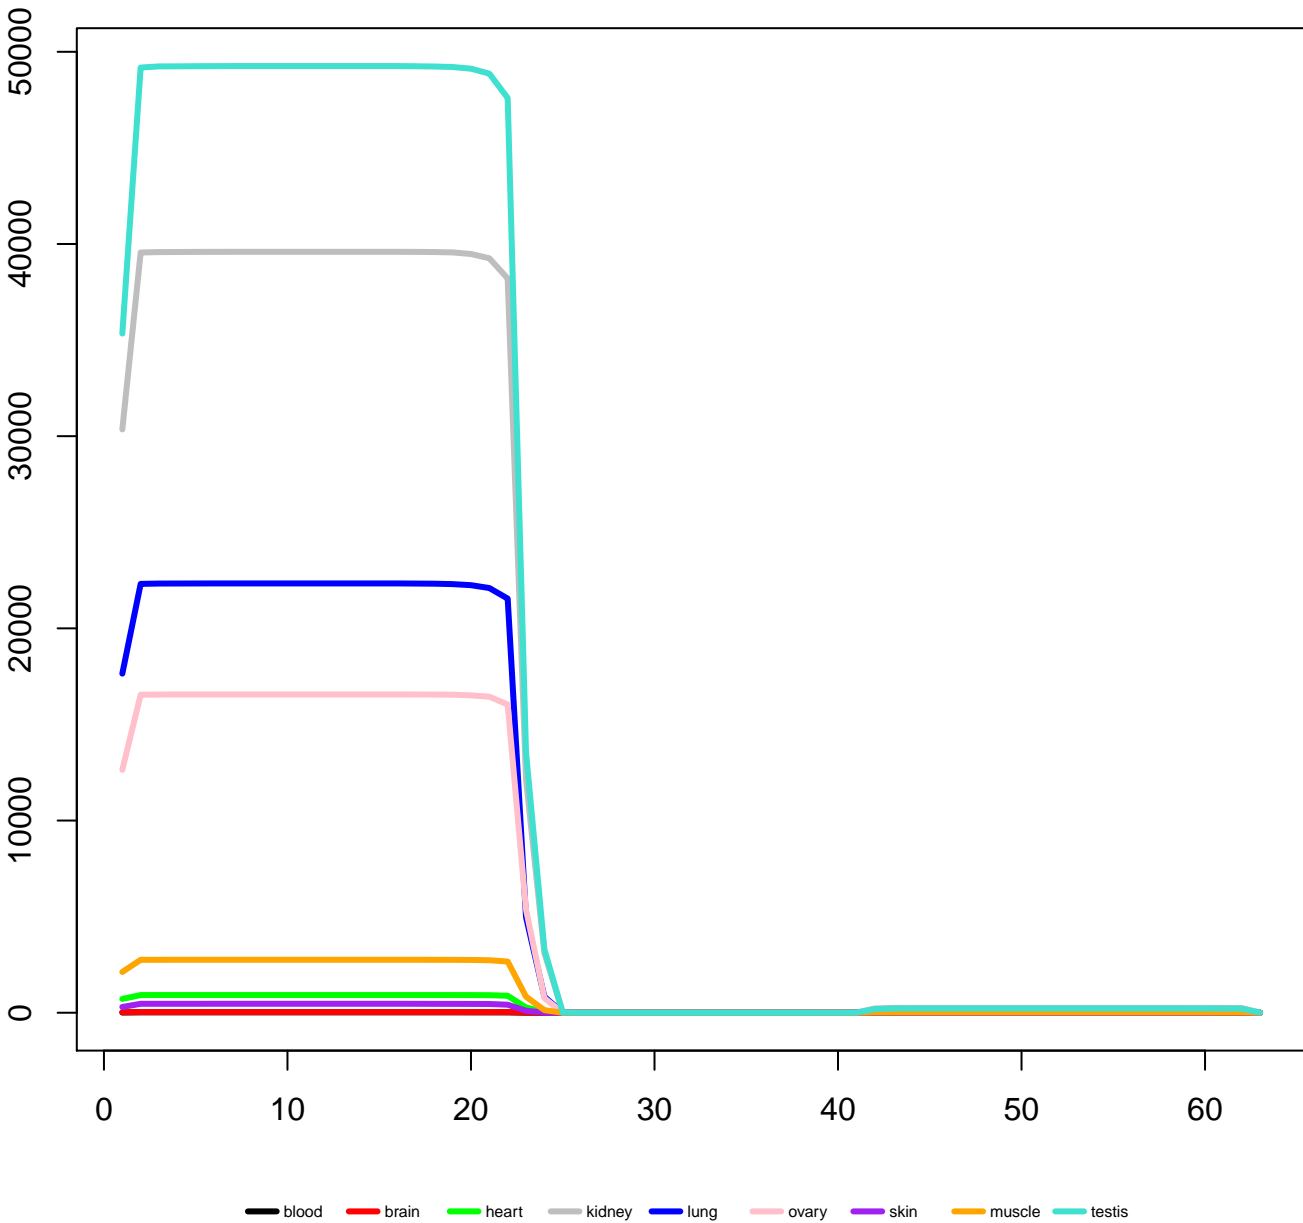



# 9\_24895666-24895756(-)\_cfa-mir-196a-1\_high

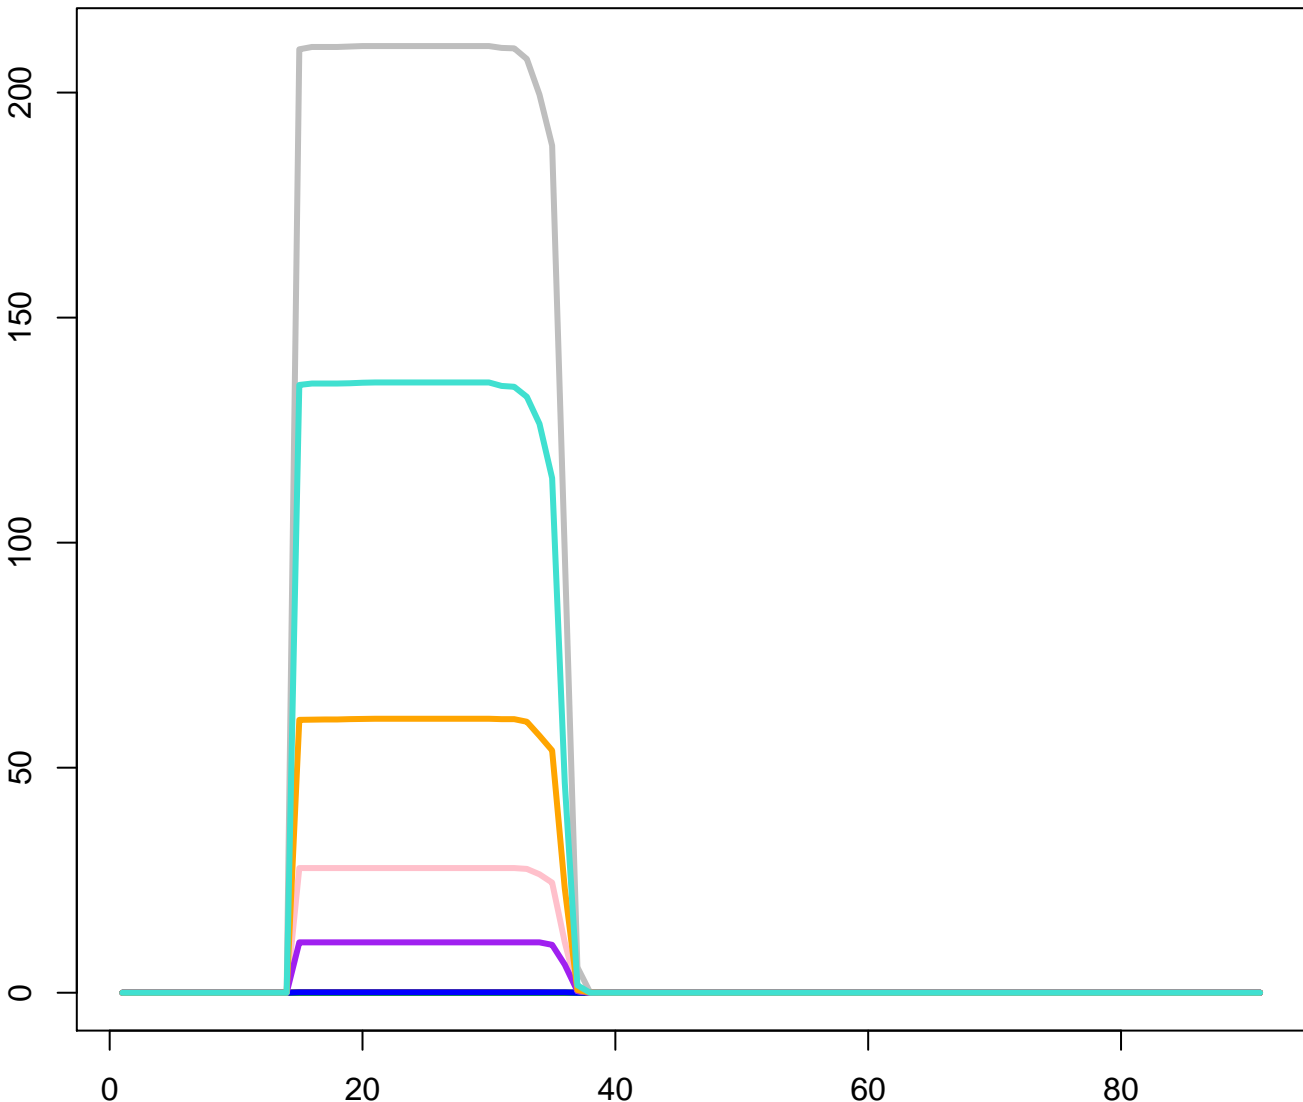

blood brain heart kidney lung ovary skin muscle testis

# 9\_32395941-32396026(-)\_mir-378\_high

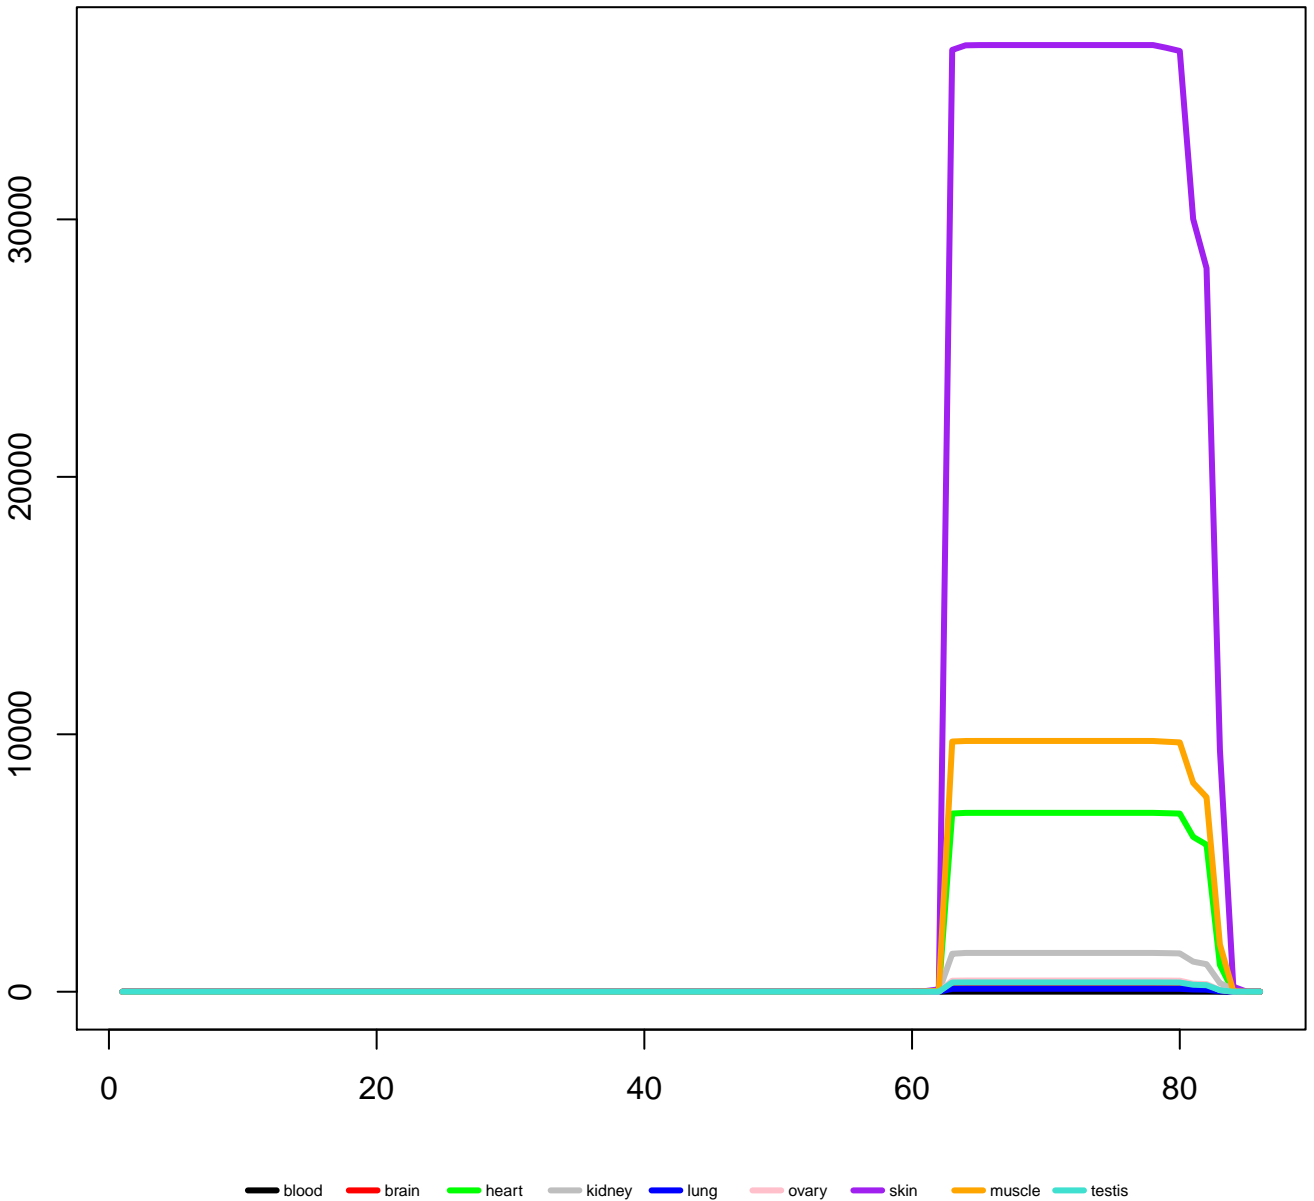

# 9\_32760904-32760963(+)\_cfa-mir-1844\_high

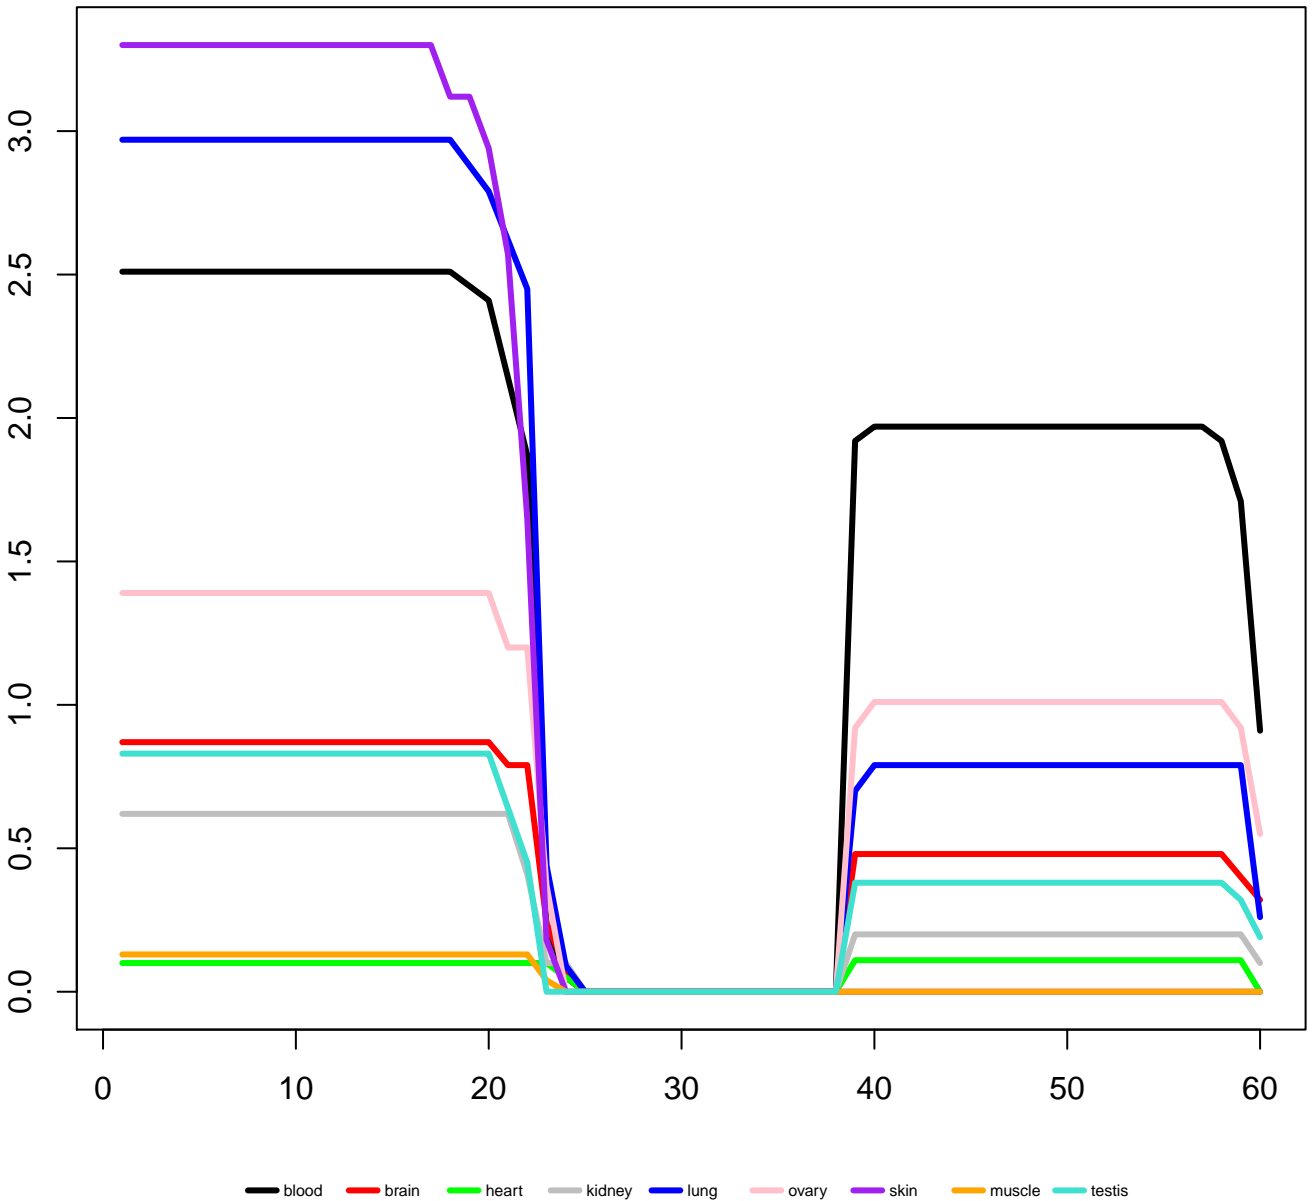

# 9\_32977367-32977477(+)\_mir-142\_low

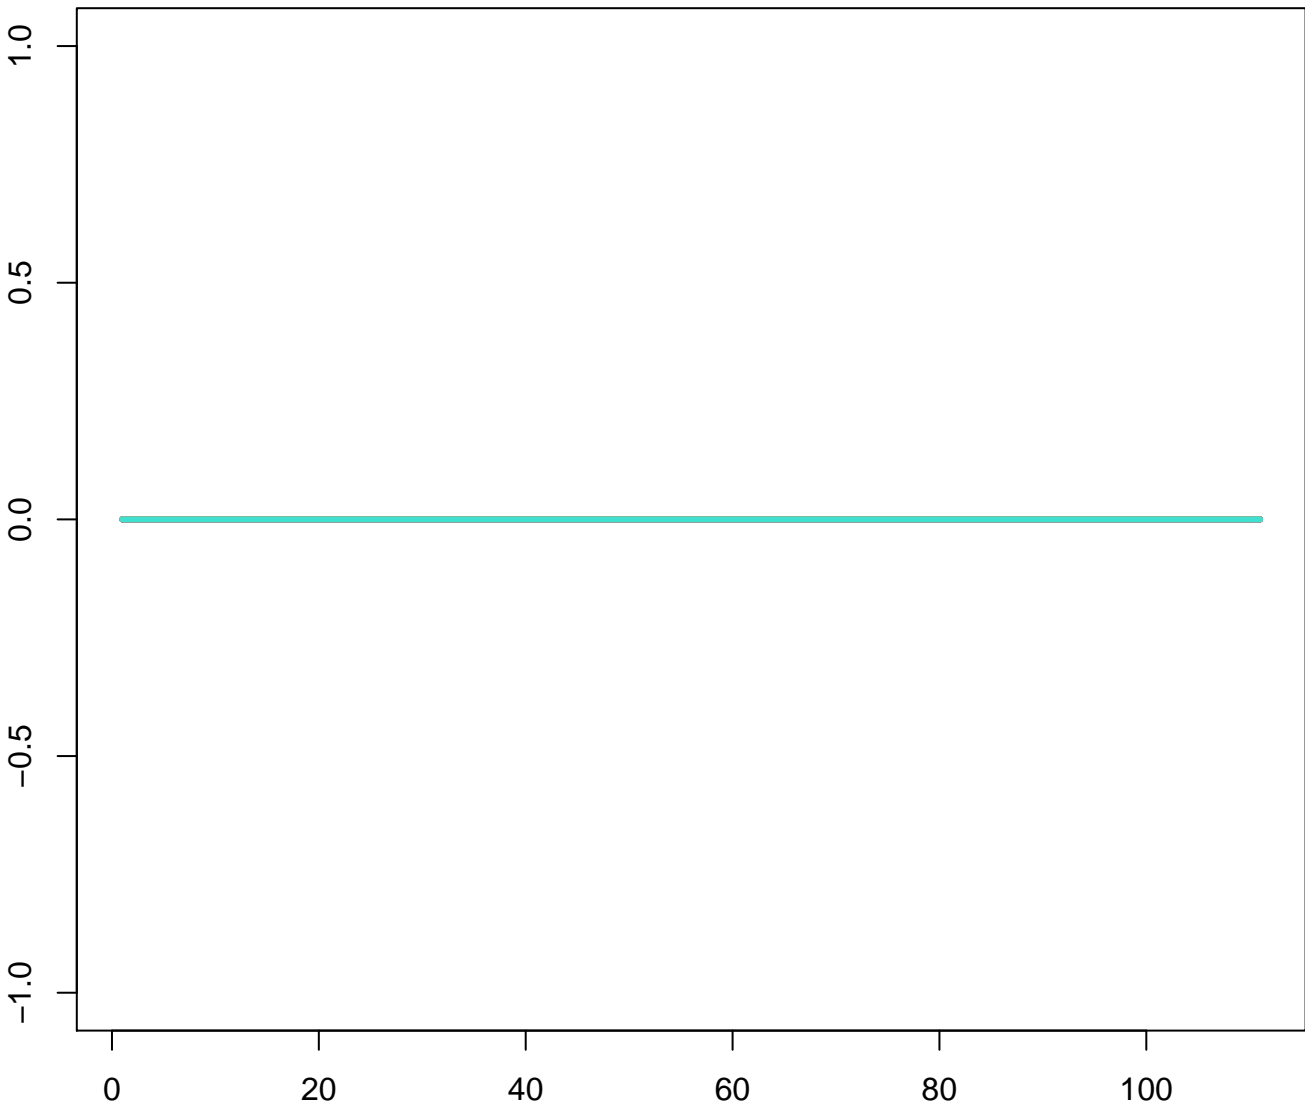

blood brain heart kidney lung ovary skin muscle testis



# 9\_33714192-33714261(-)\_cfa-mir-454\_high

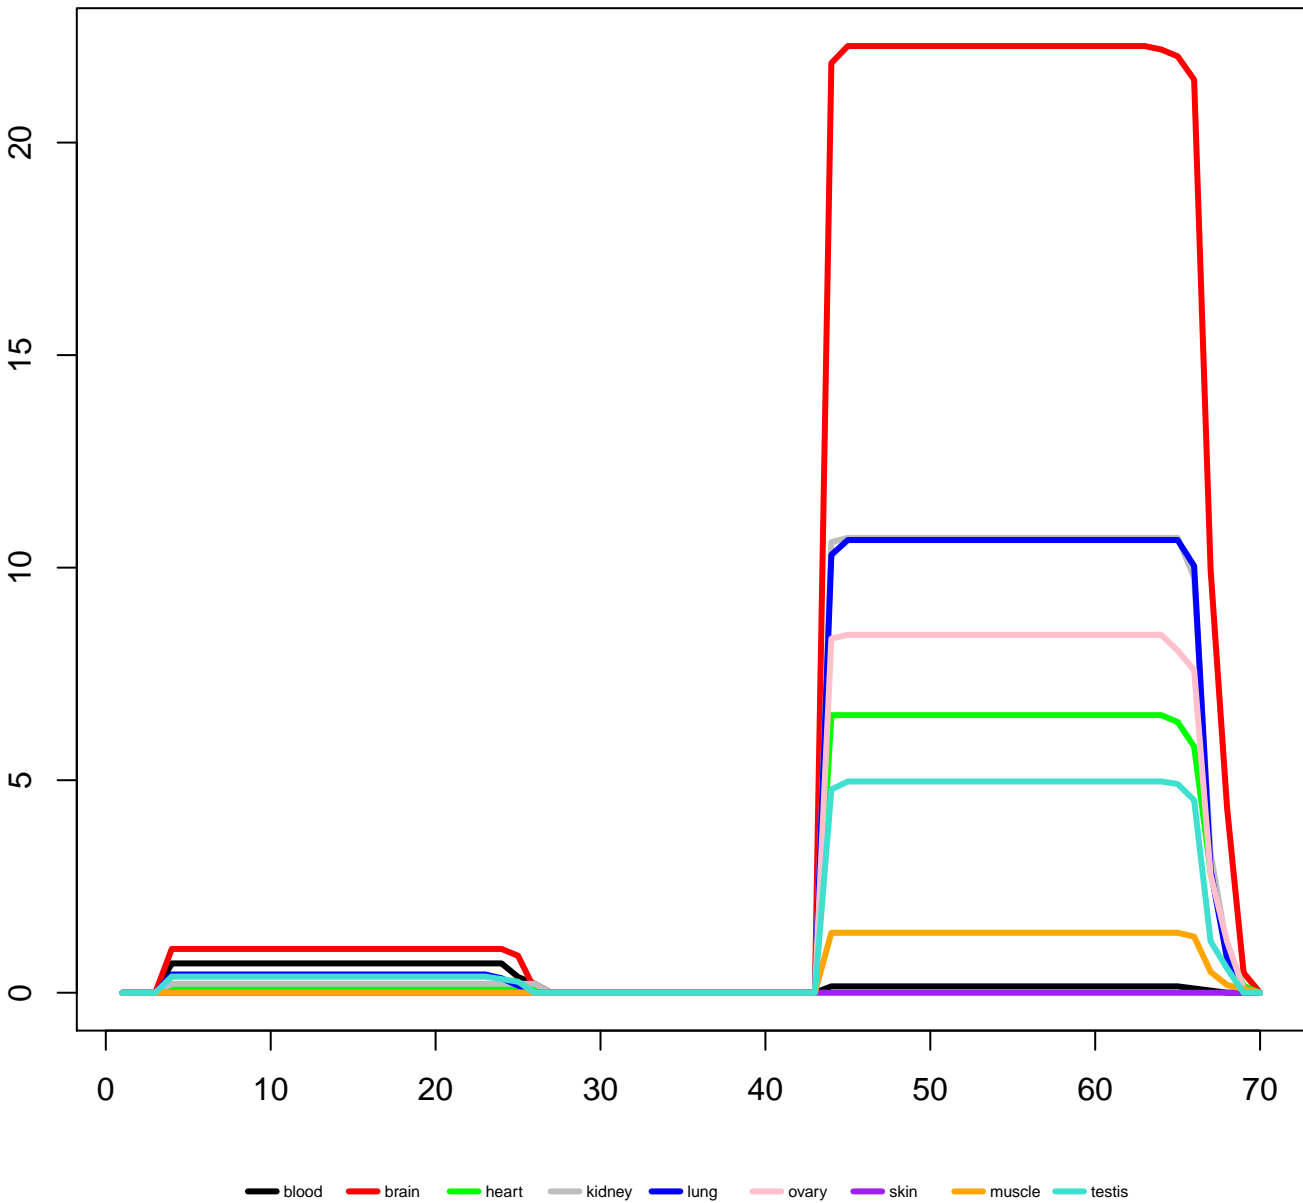

# 9\_33724572-33724655(-)\_cfa-mir-301a\_high

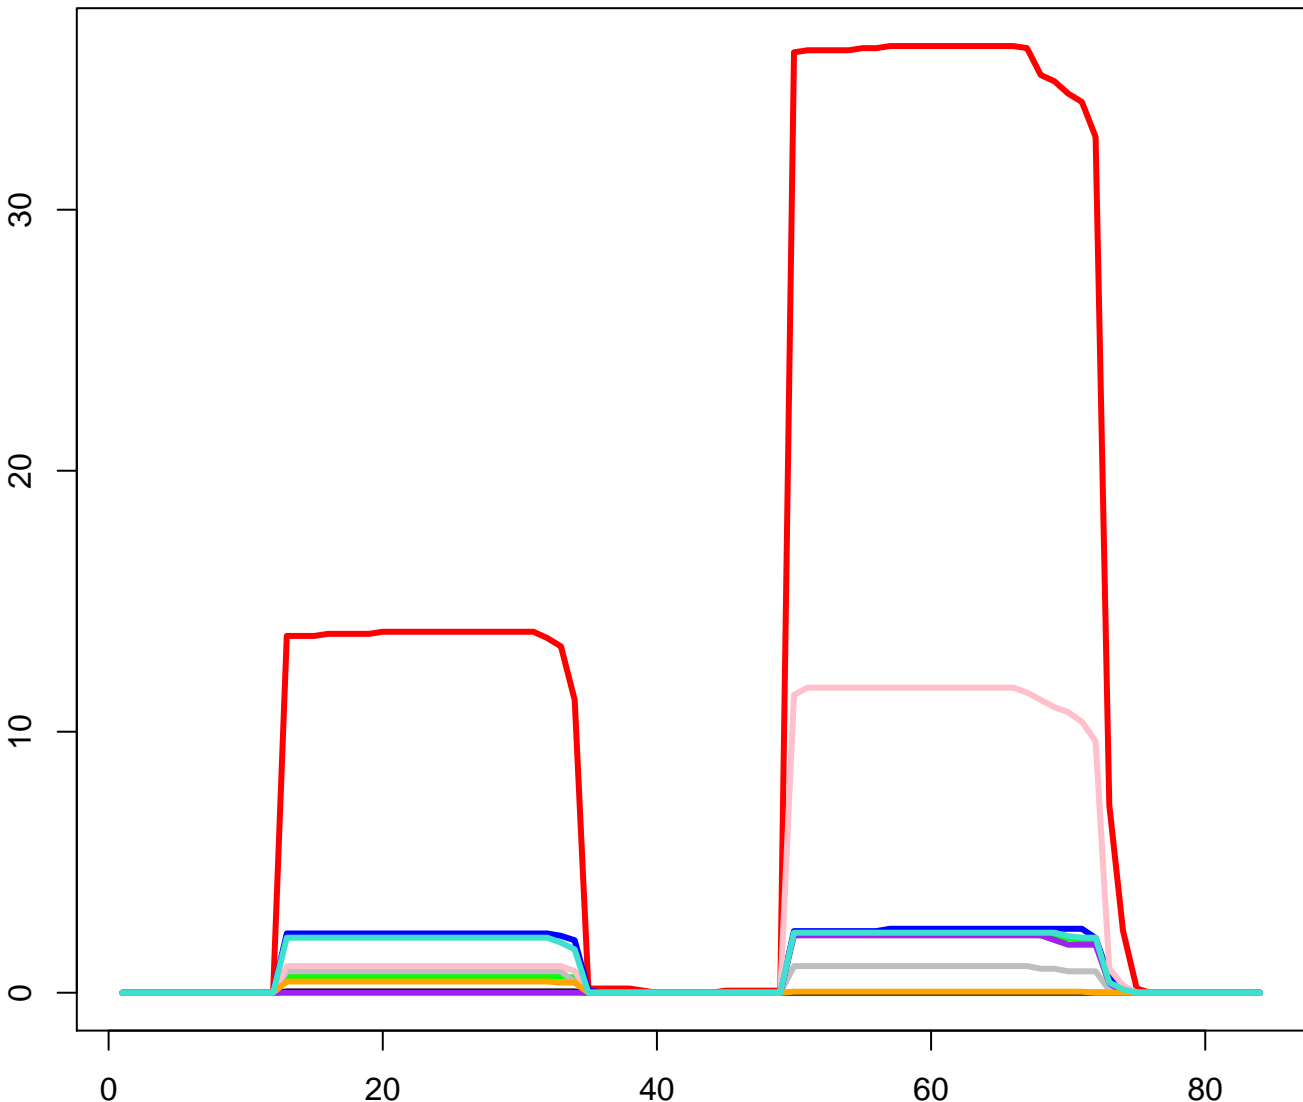

— blood — brain — heart — kidney — lung — ovary — skin — muscle — testis

# 9\_34340550-34340609(+)\_cfa-mir-21\_high

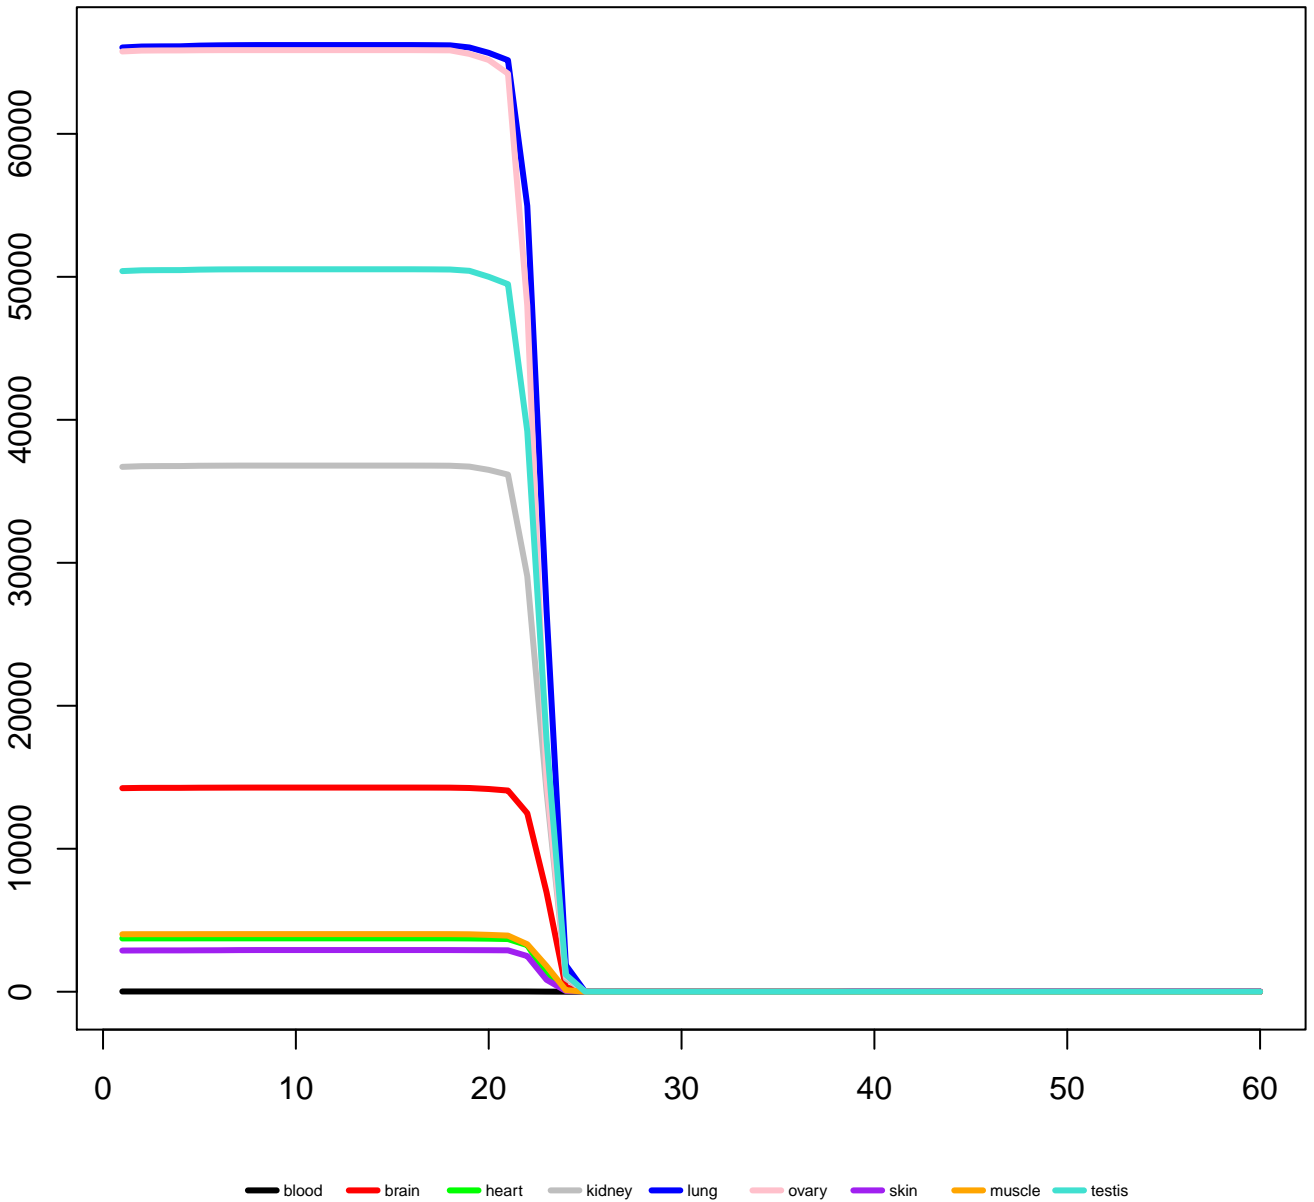





# 9\_41303092-41303202(-)\_cfa-mir-365-2\_high

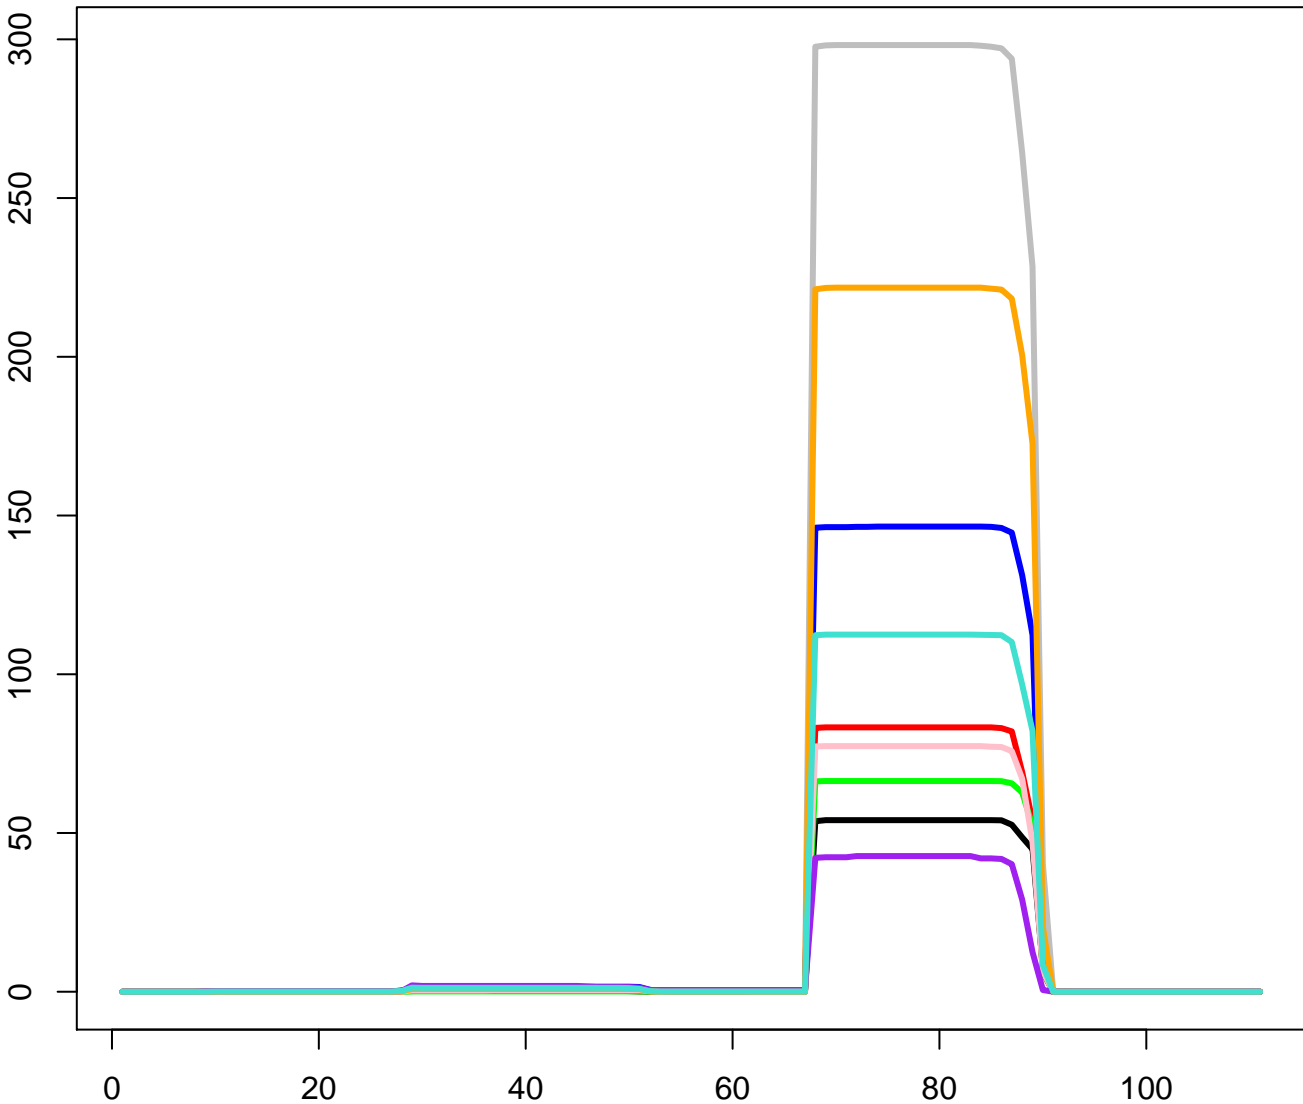

— blood — brain — heart — kidney — lung — ovary — skin — muscle — testis

# 9\_41316481-41316536(-)\_cfa-mir-193a\_high

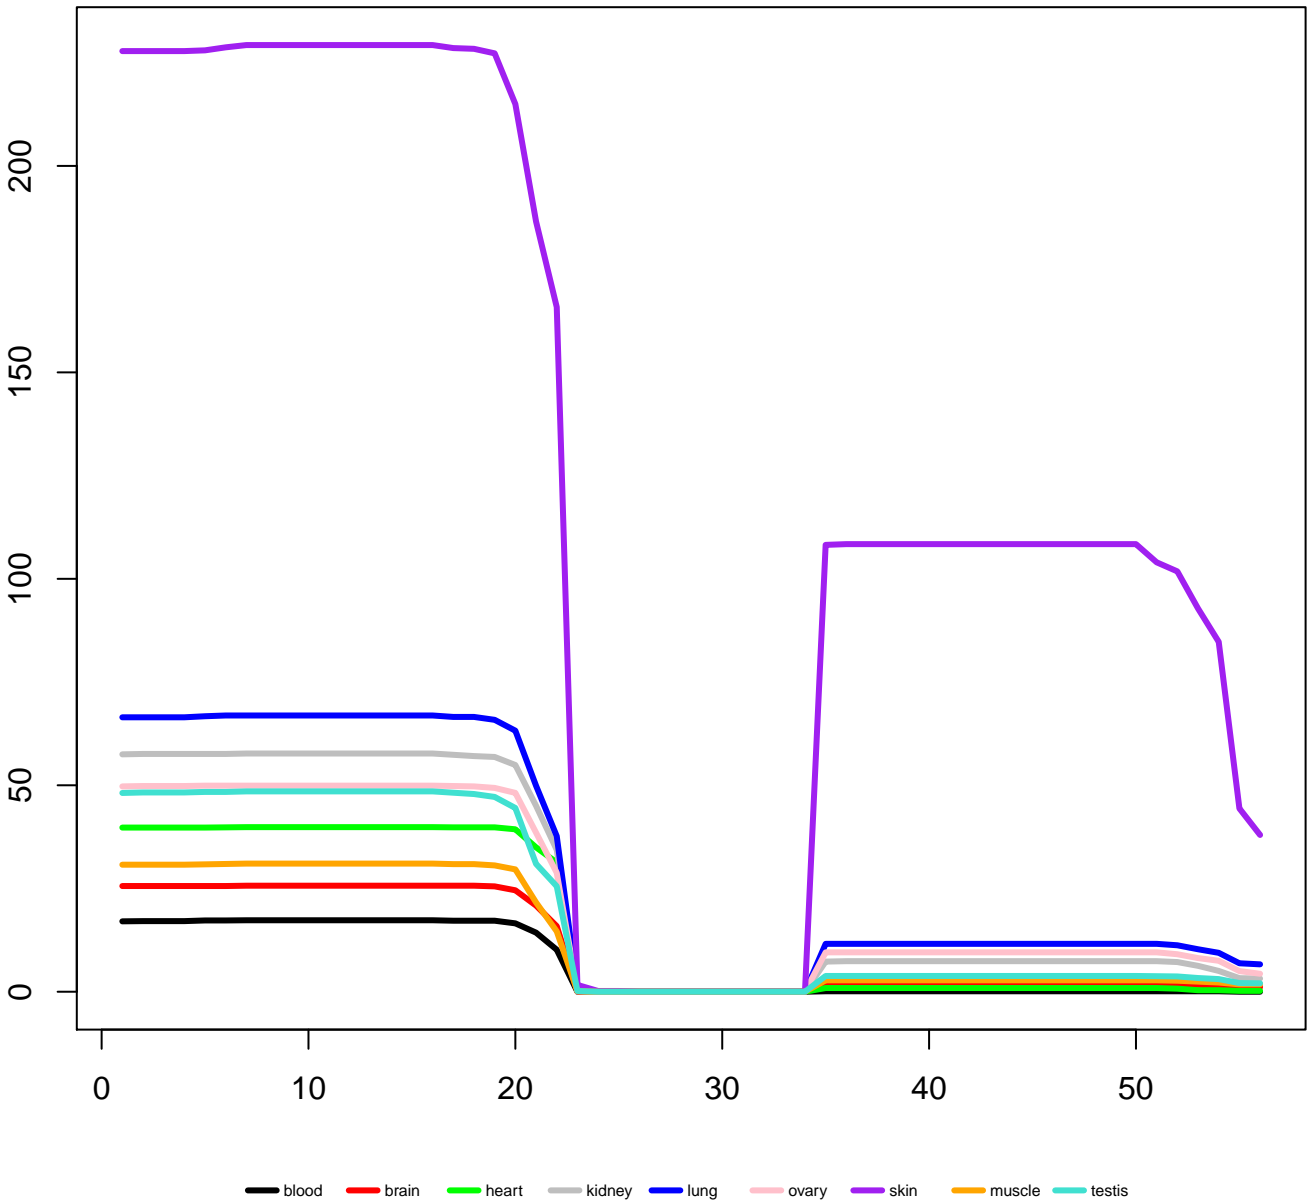

# 9\_43030863-43030931(-)\_cfa-mir-451\_high

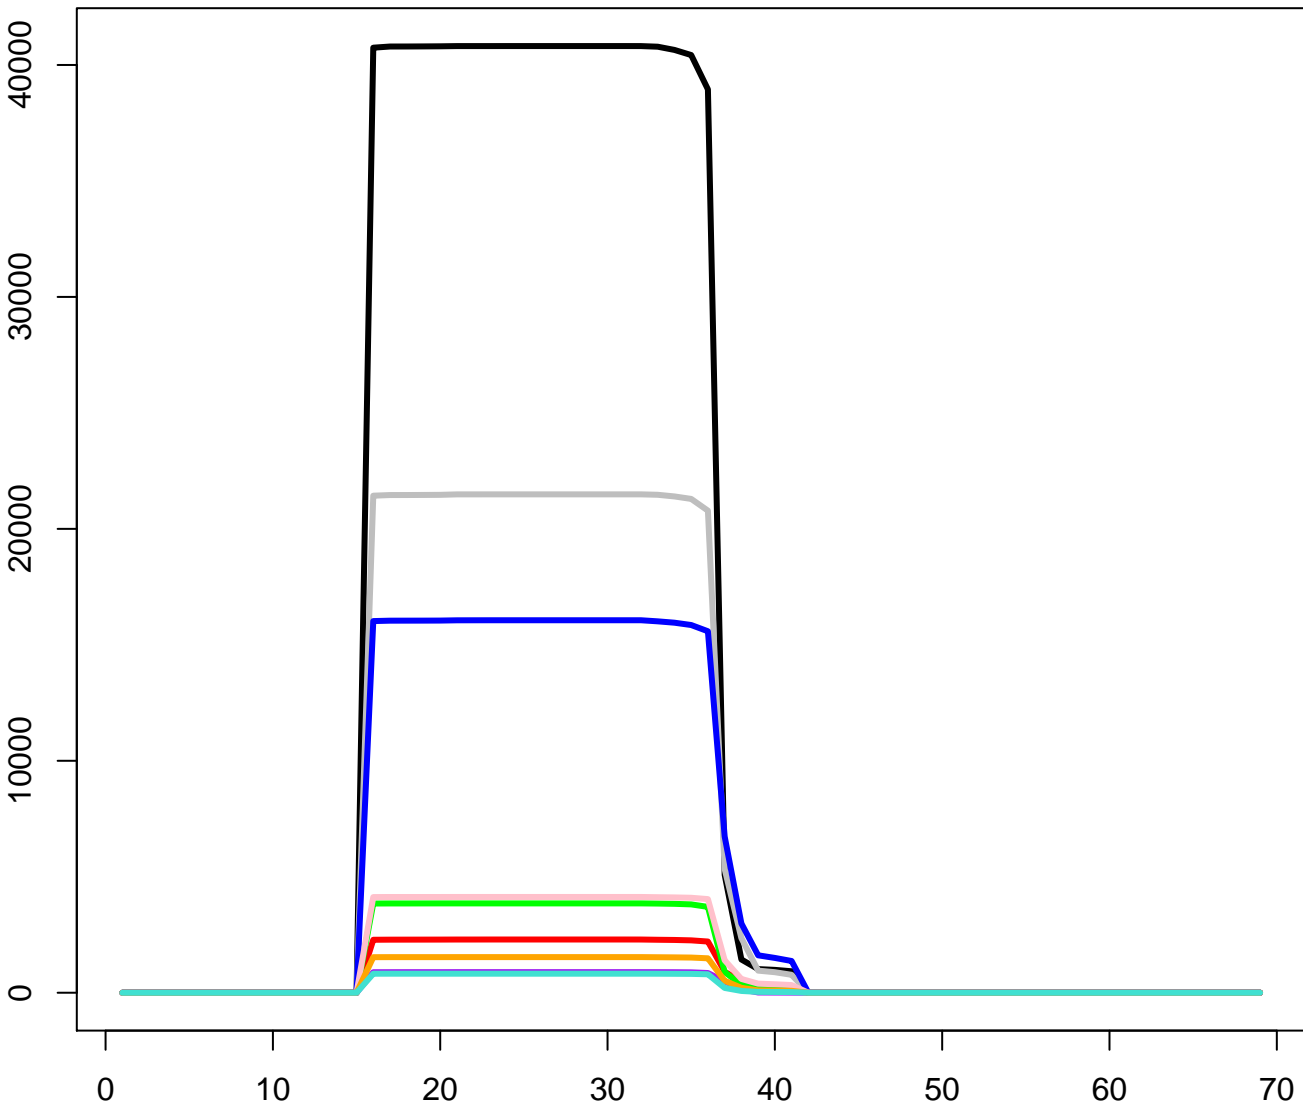

— blood — brain — heart — kidney — lung — ovary — skin — muscle — testis

# 9\_43031035-43031094(-)\_cfa-mir-144\_high

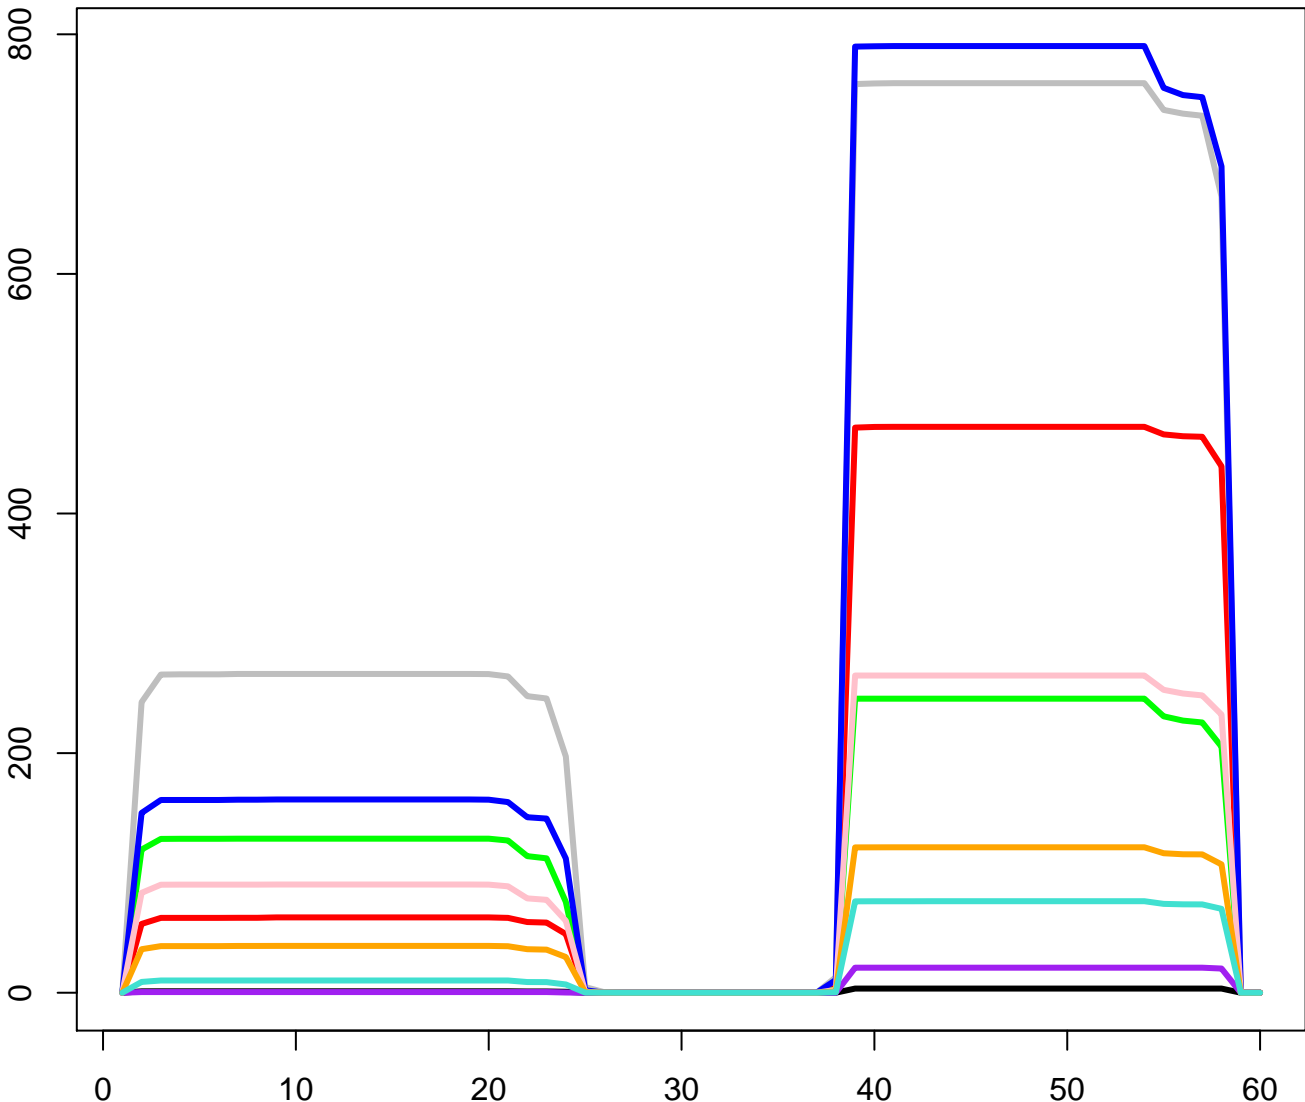

— blood — brain — heart — kidney — lung — ovary — skin — muscle — testis

# 9\_43501537-43501604(+)\_mir-4523\_low



# 9\_44155904-44155978(-)\_mir-423\_low

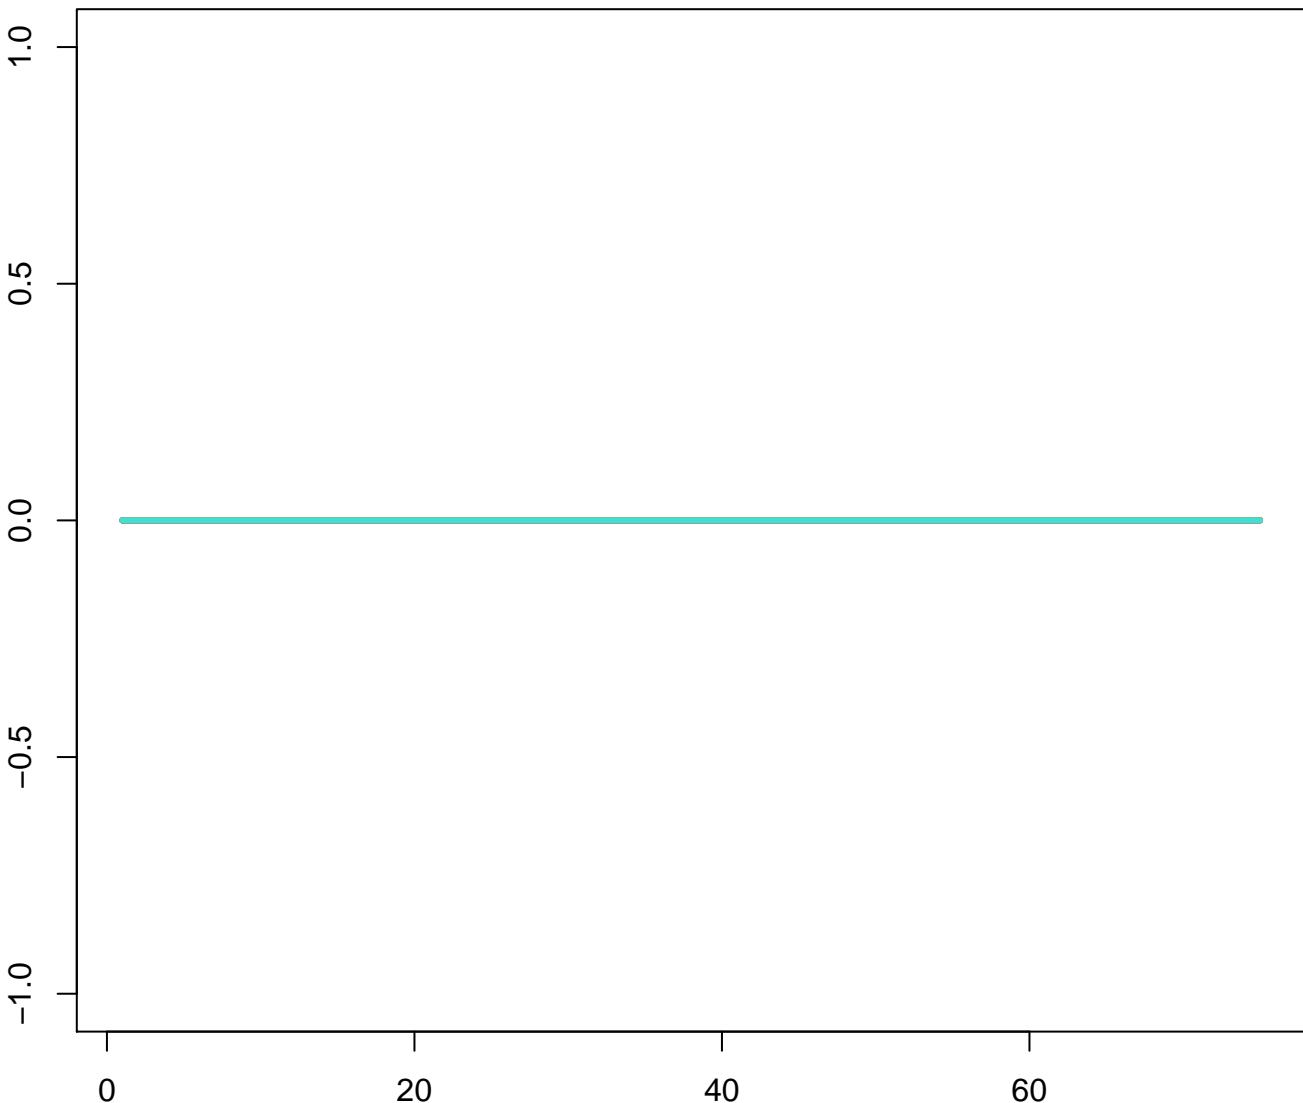

blood brain heart kidney lung ovary skin muscle testis

# 9\_44155913-44155971(+)\_cfa-mir-423a\_high

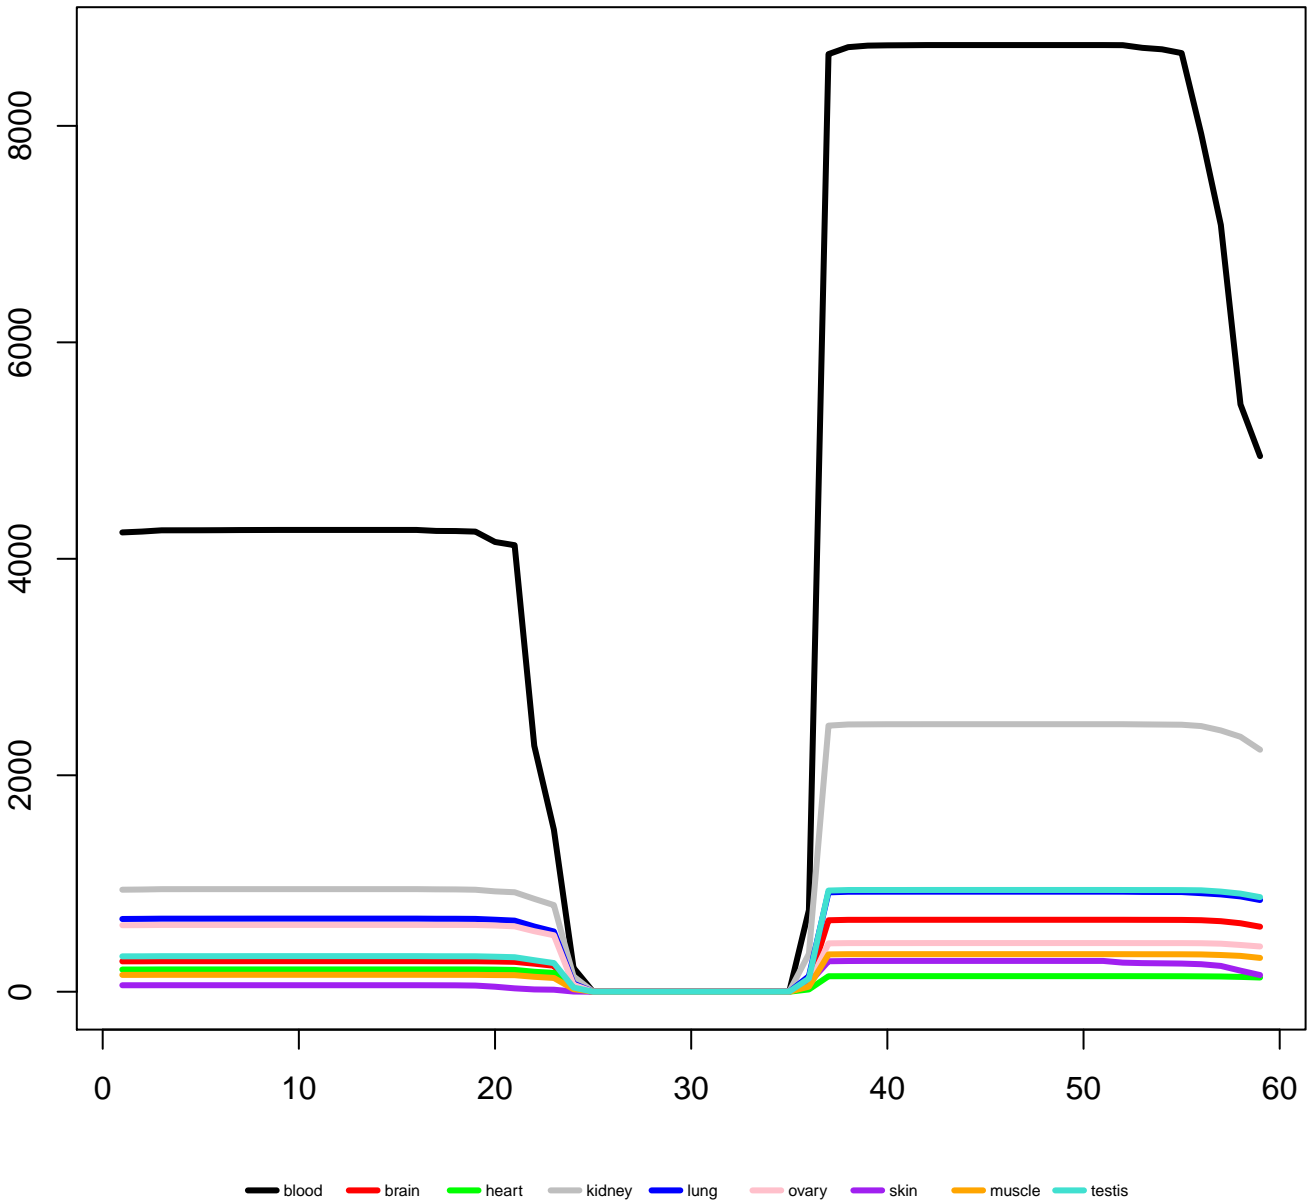



# 9\_45852534-45852593(-)\_cfa-mir-22\_high

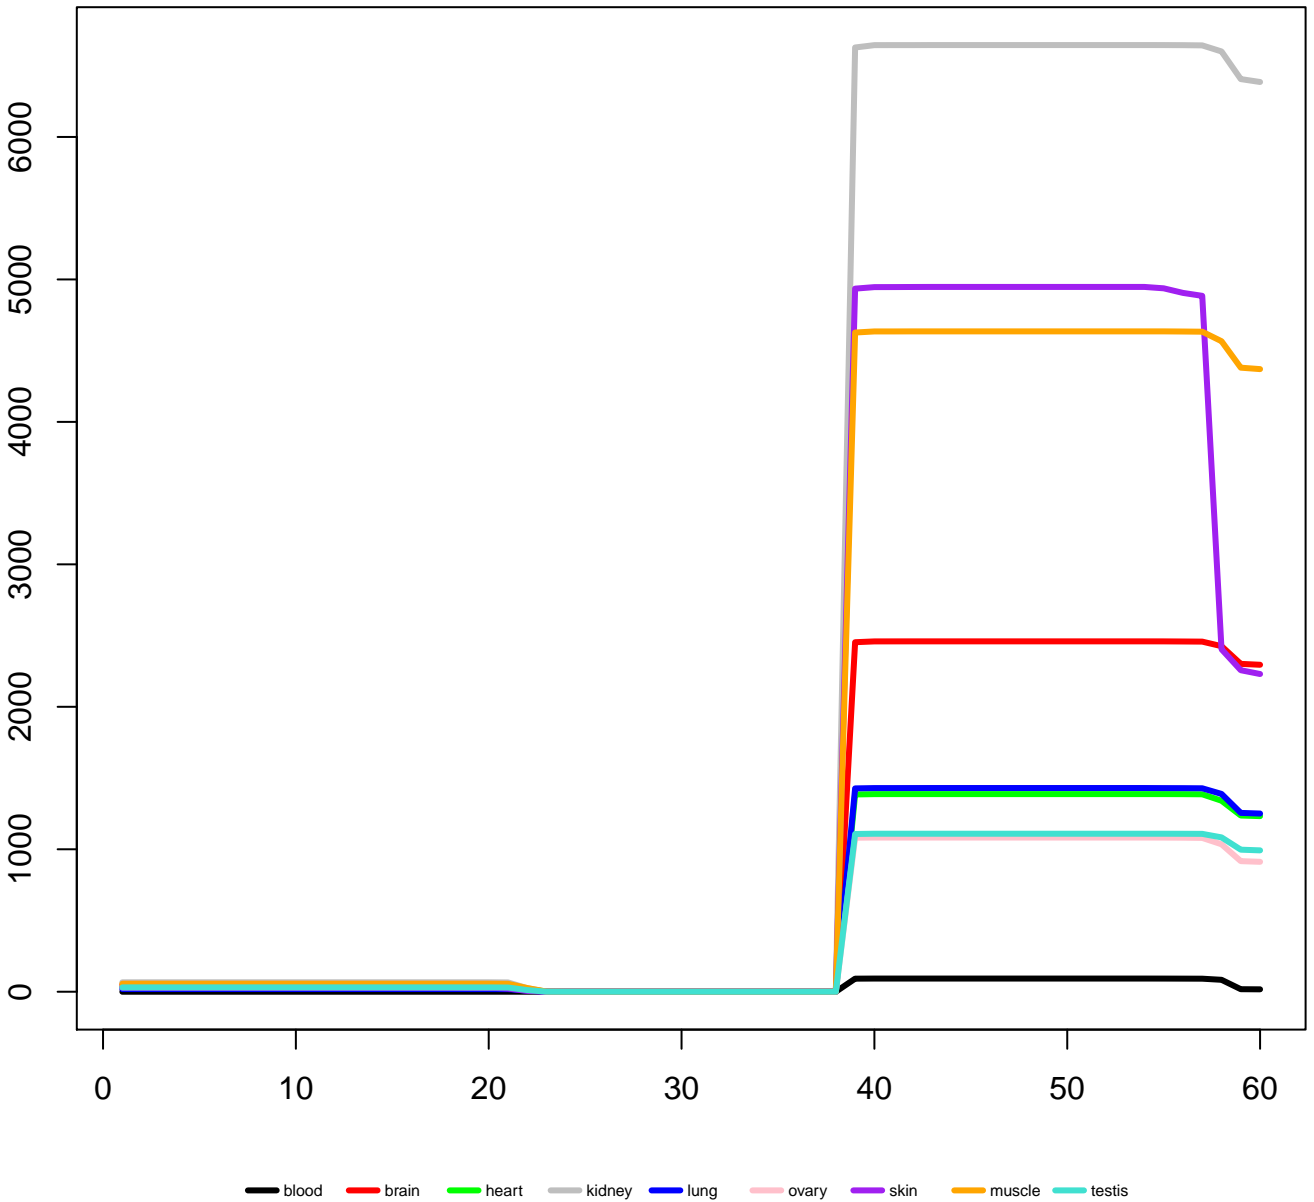



# 9\_46153913-46153974(-)\_cfa-mir-212\_high

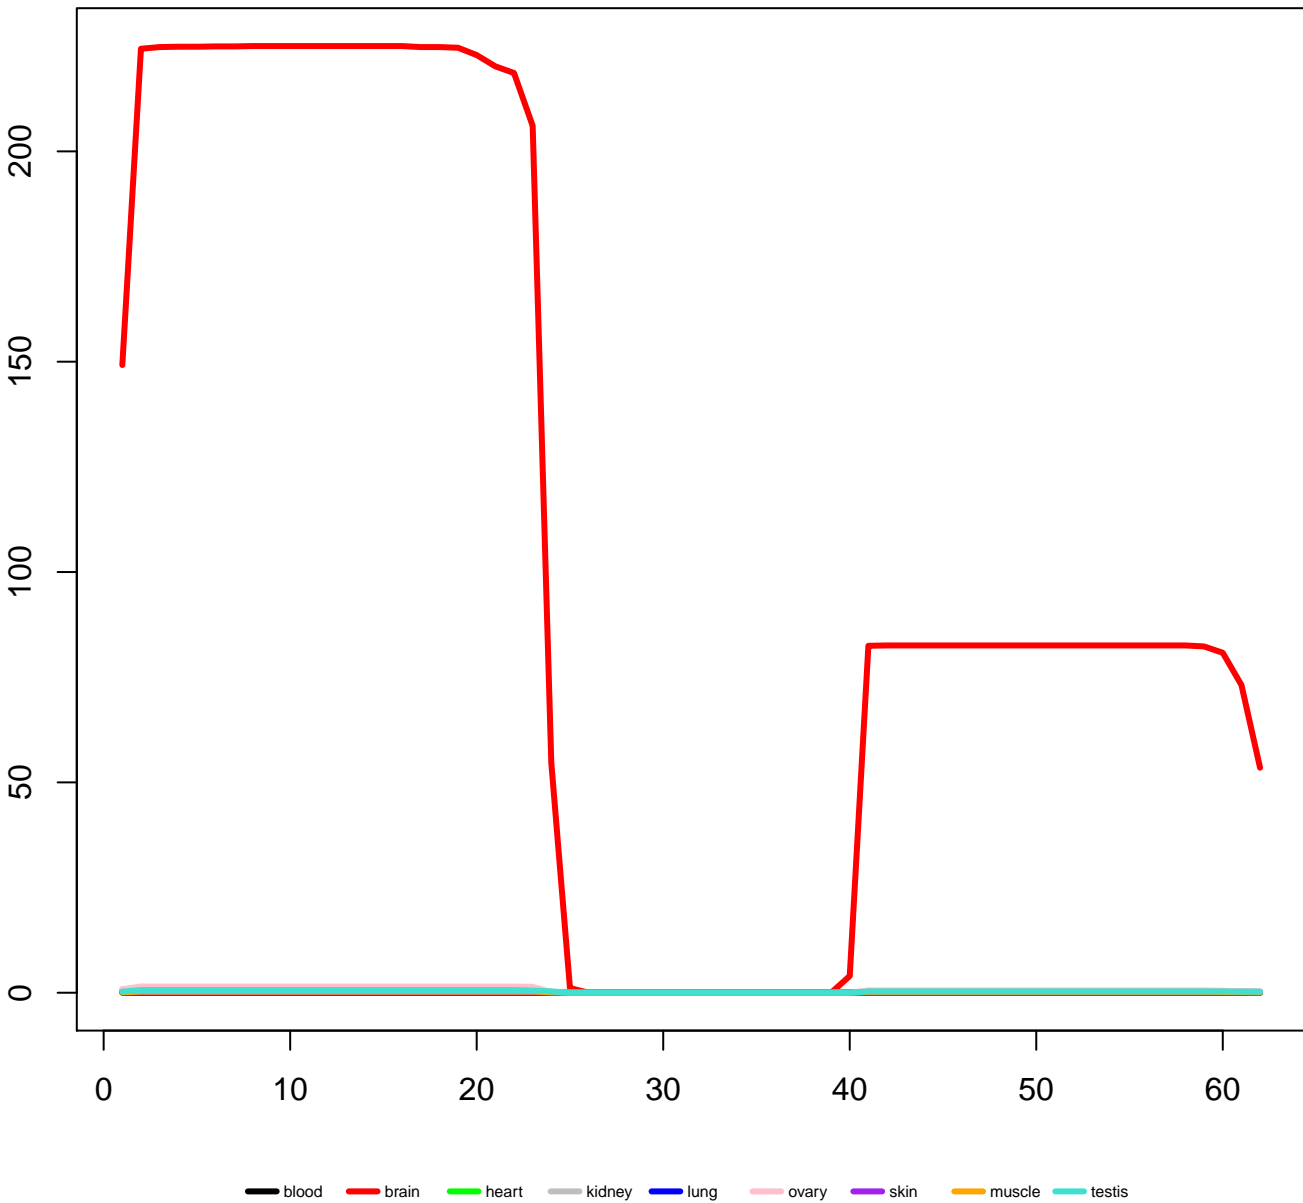

# 9\_47791955-47792083(-)\_cfa-mir-8889\_low

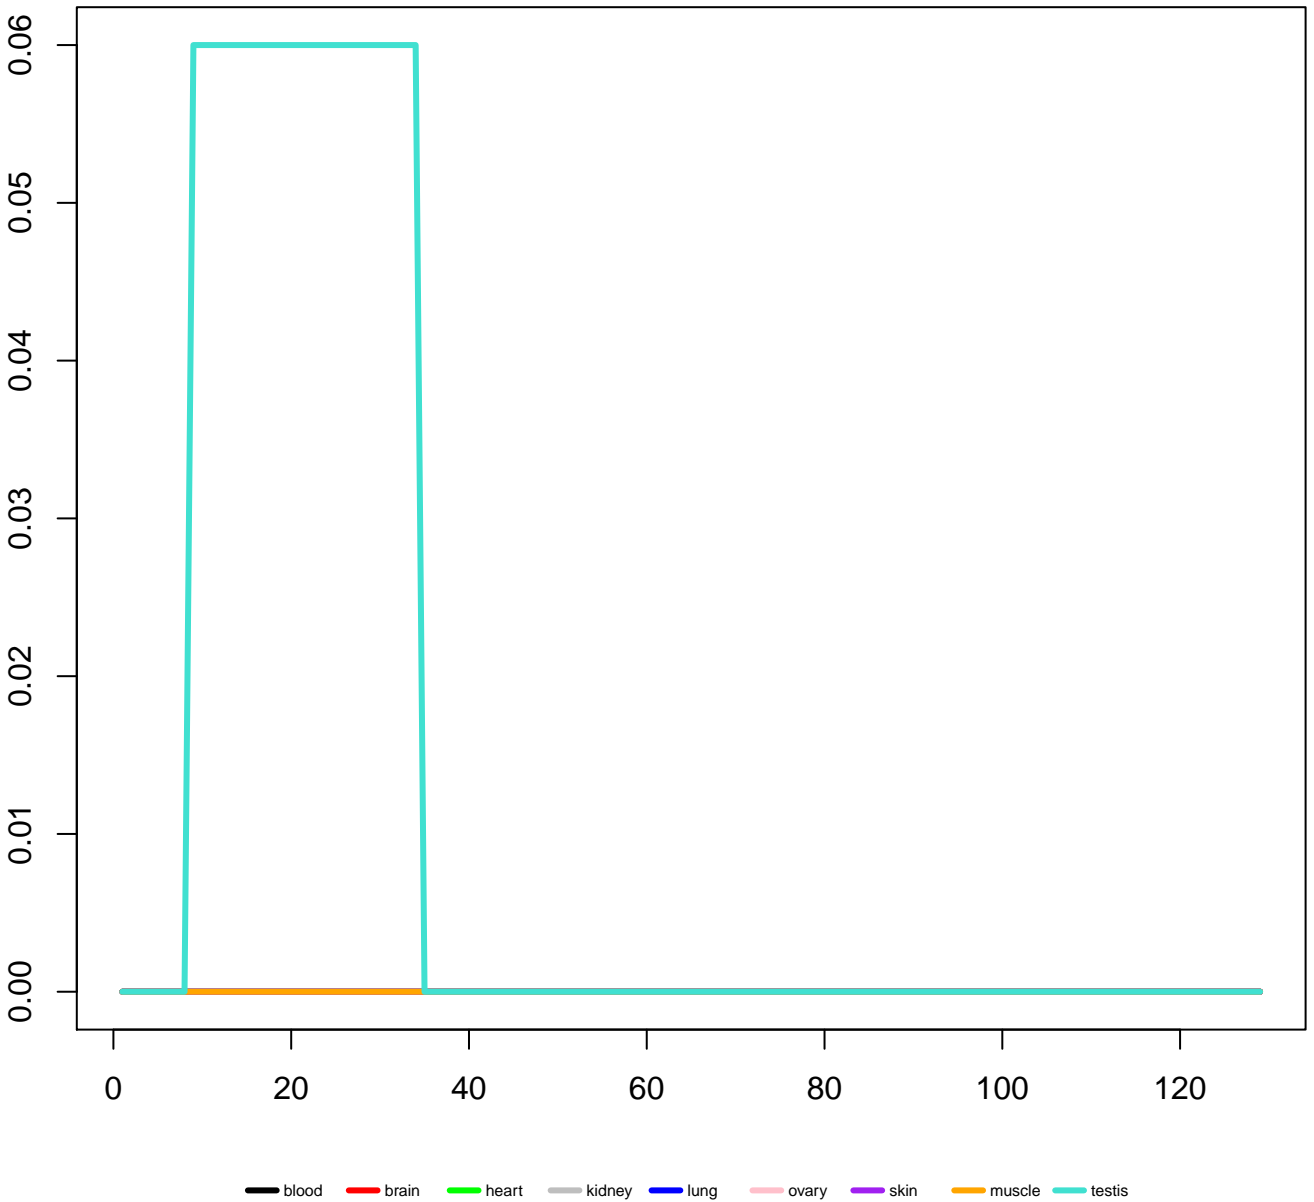

# 9\_48879438-48879496(-)\_cfa-mir-126\_high

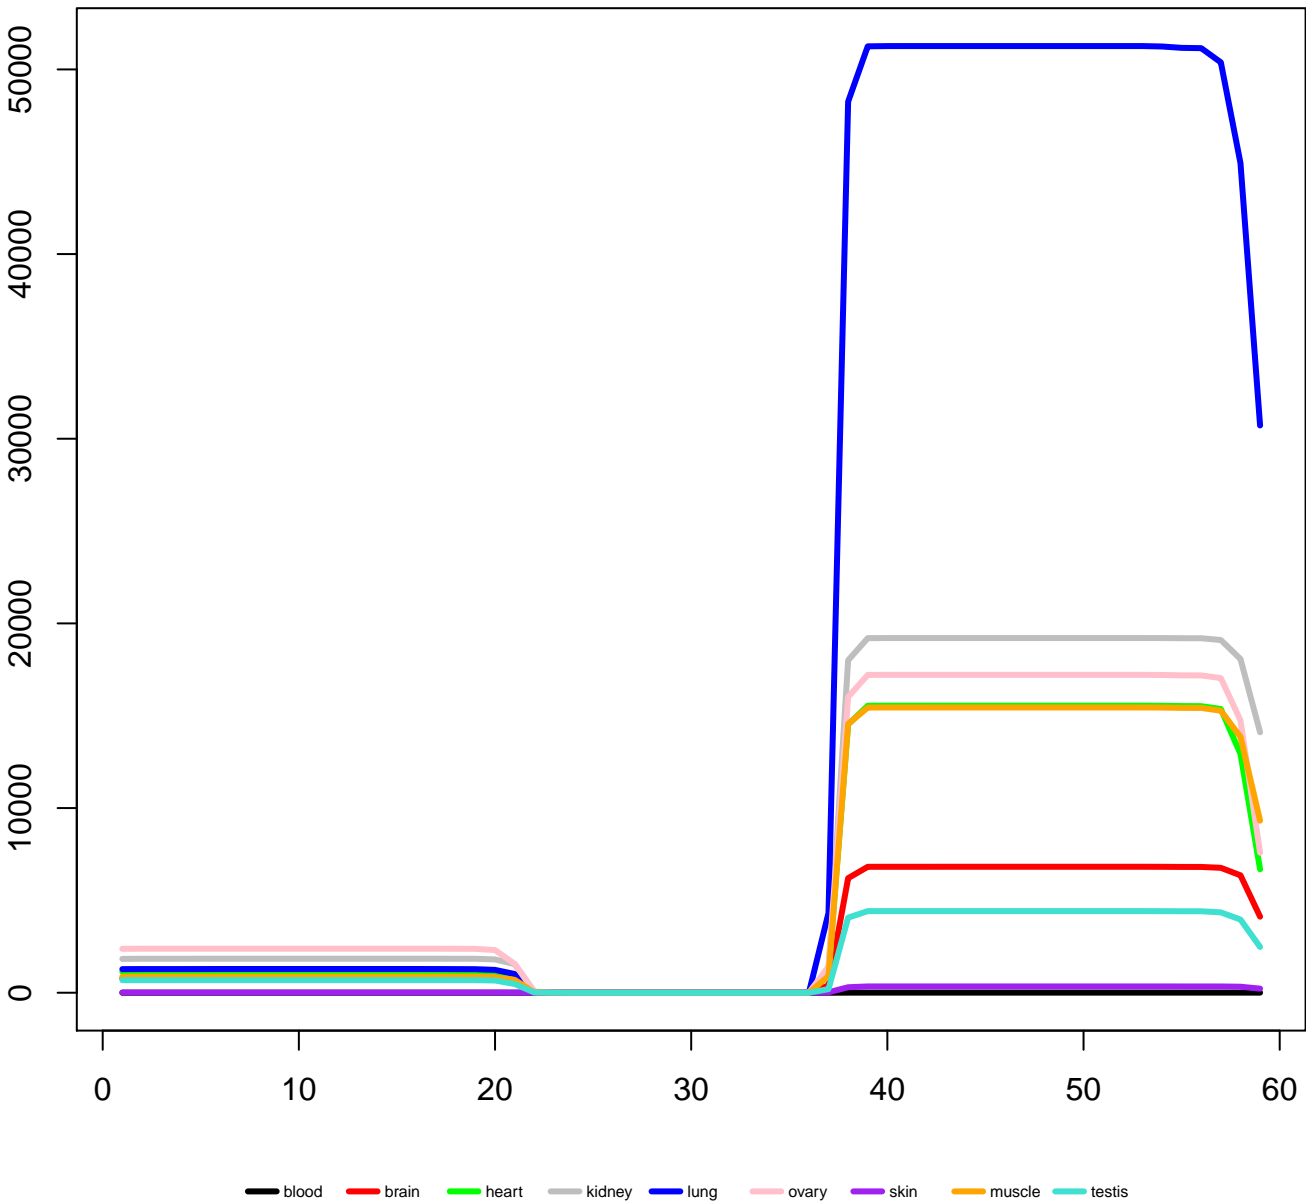

# 9\_54627793-54627909(-)\_cfa-mir-8887\_low

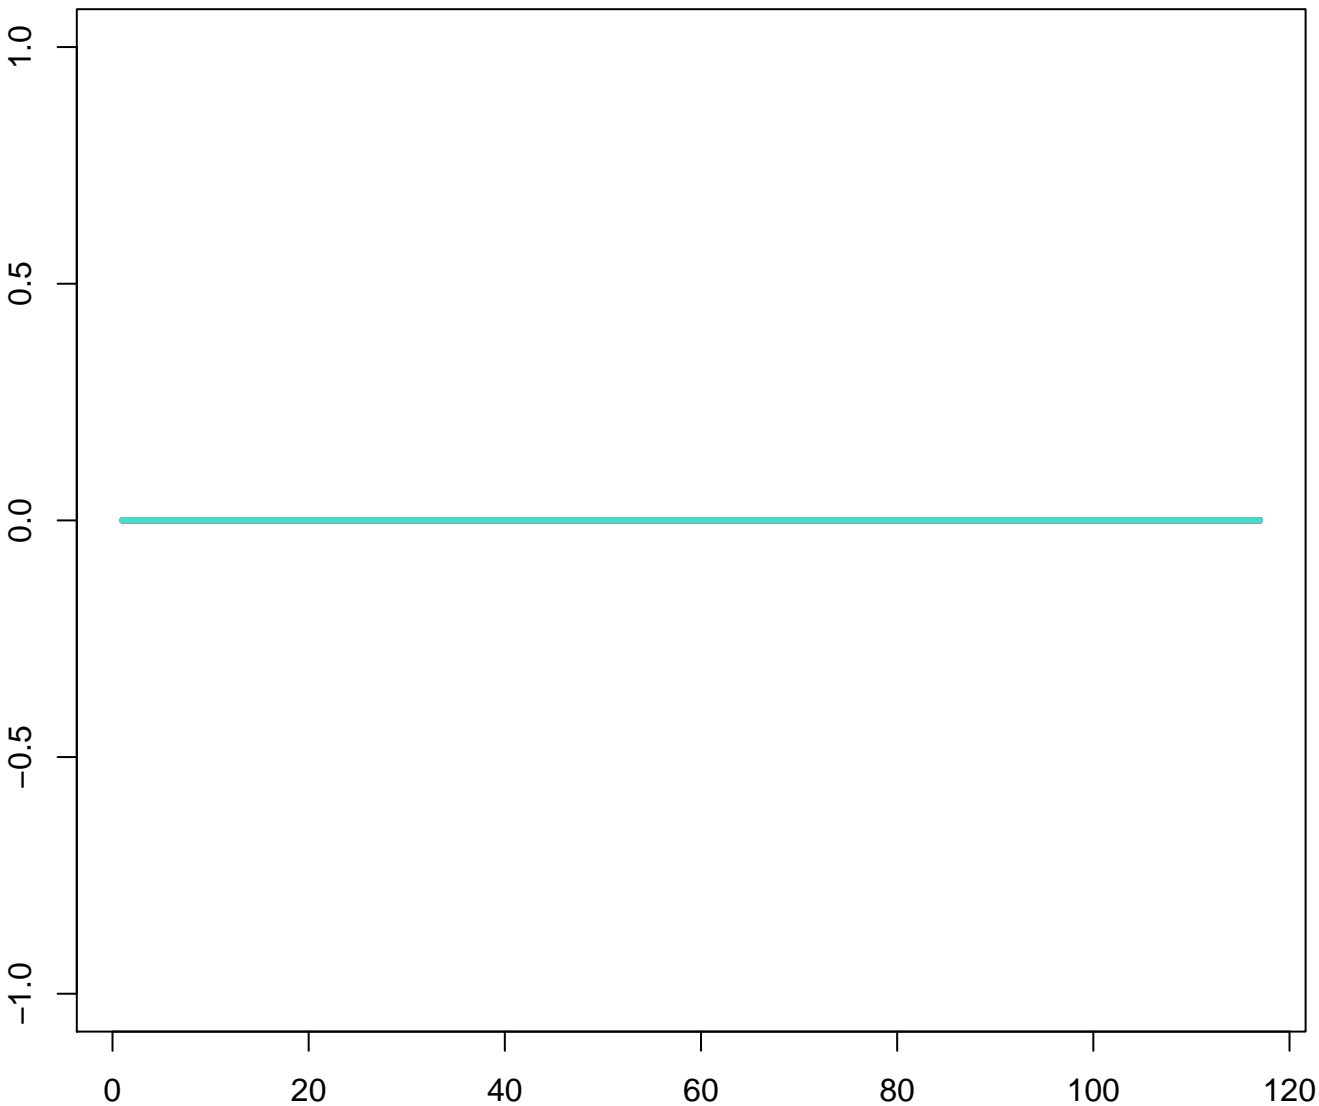

blood brain heart kidney lung ovary skin muscle testis

# 9\_55139107-55139171(+)\_cfa-mir-219-2\_high

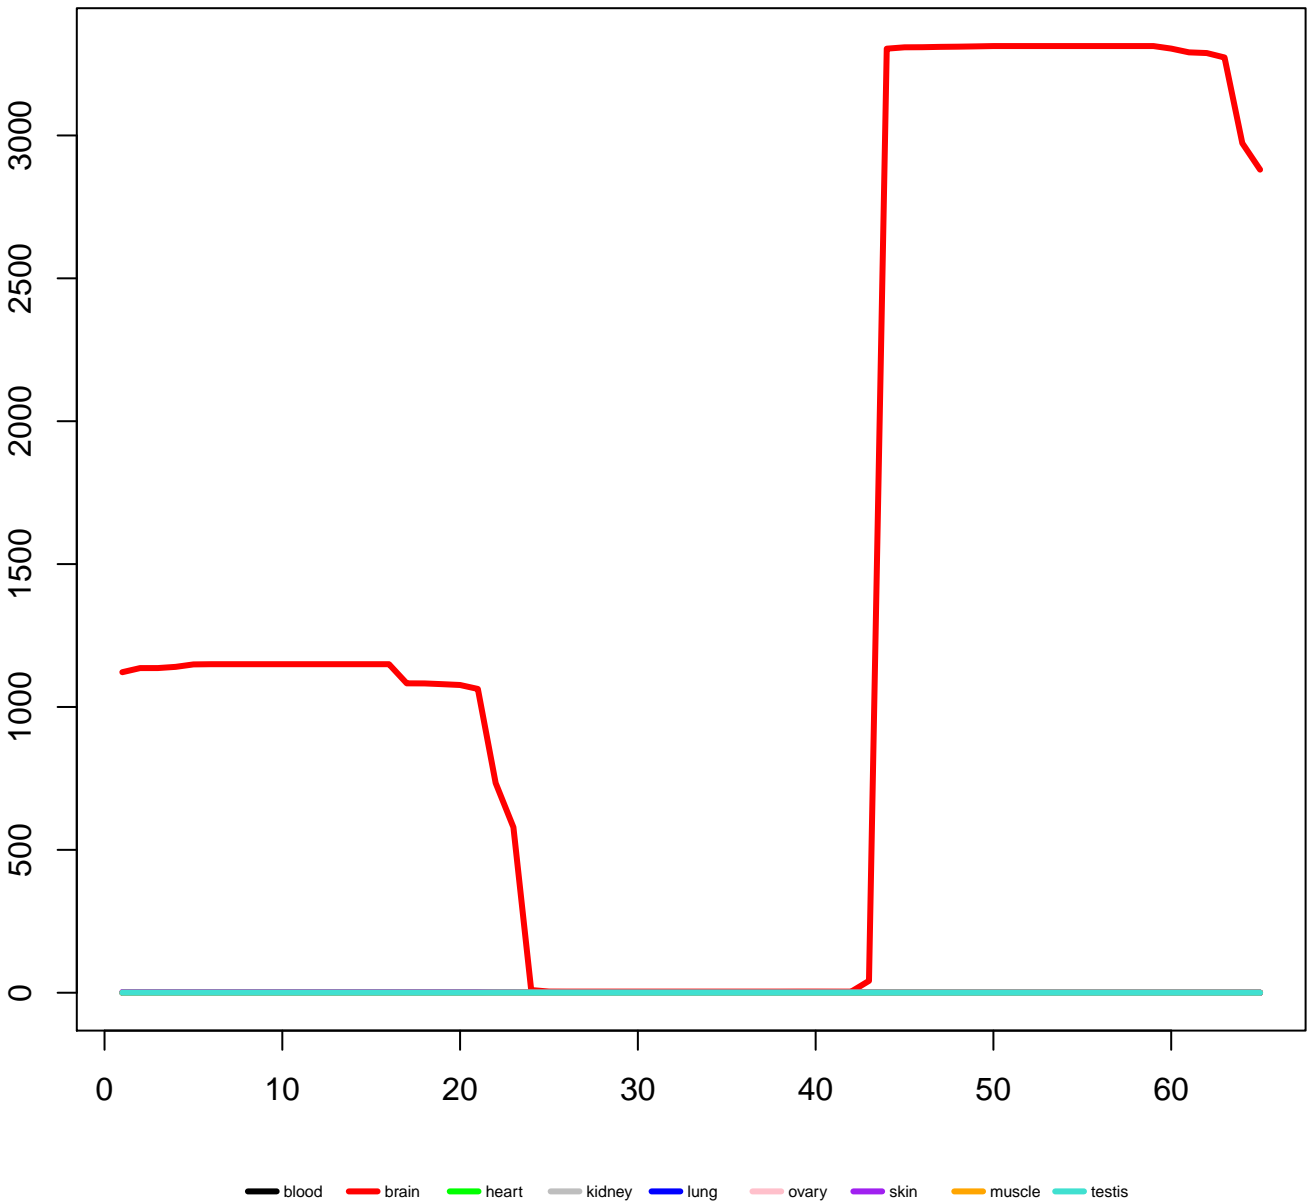

# 9\_55262159-55262231(+)\_mir-3154\_high

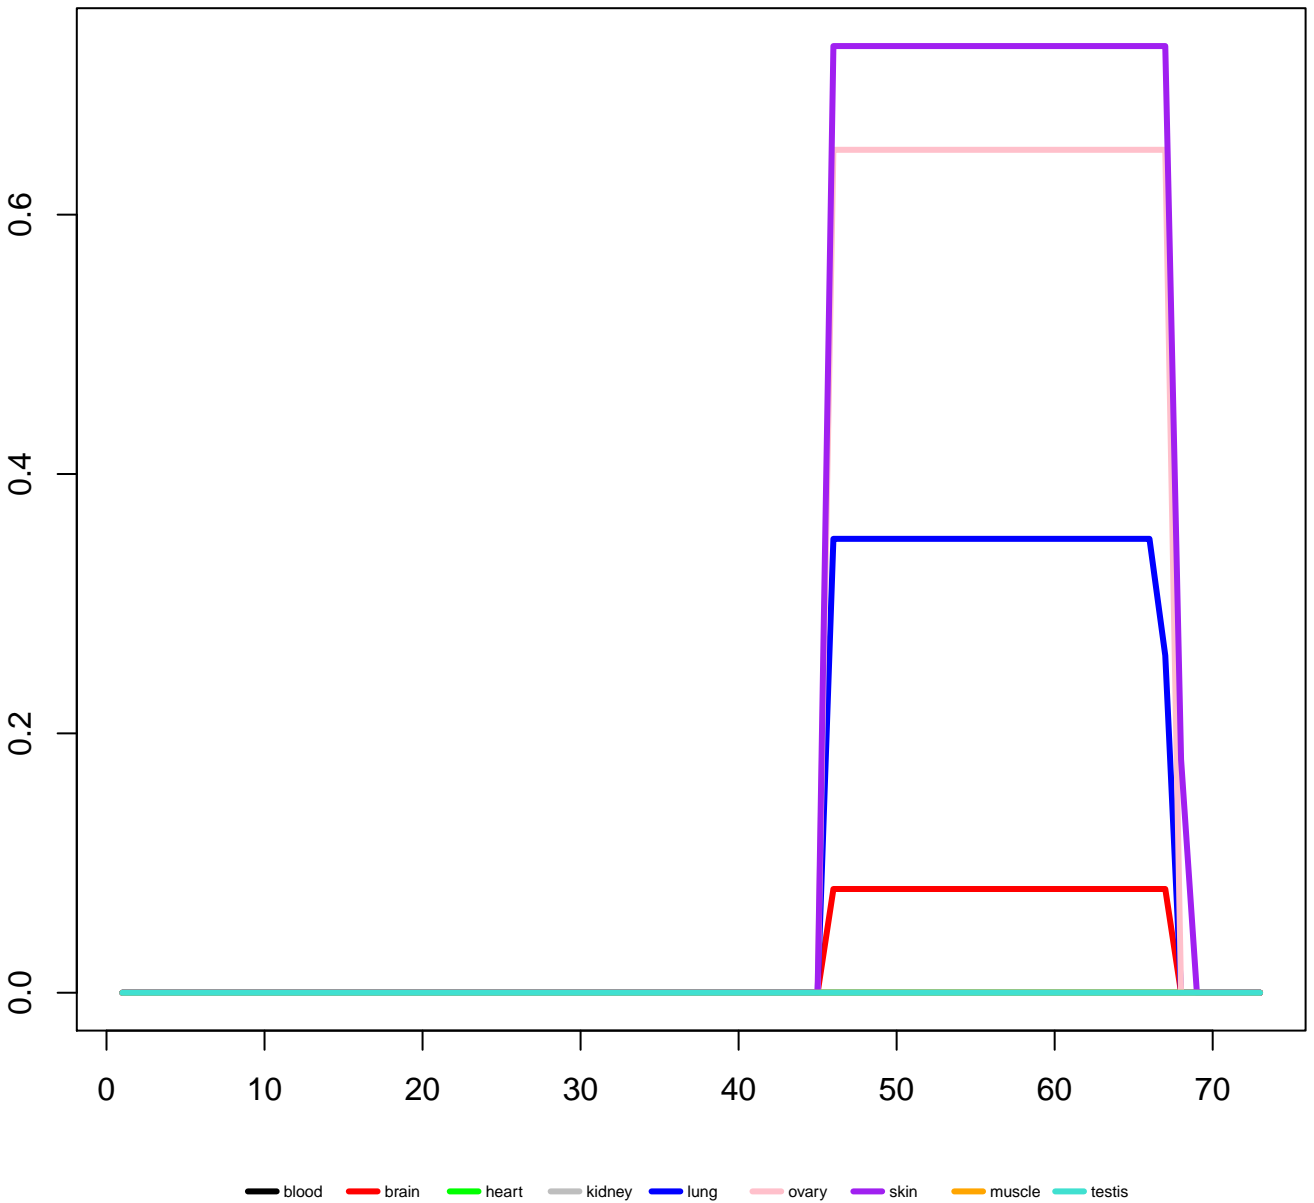



# 9\_55262354-55262412(+)\_cfa-mir-199-3\_high

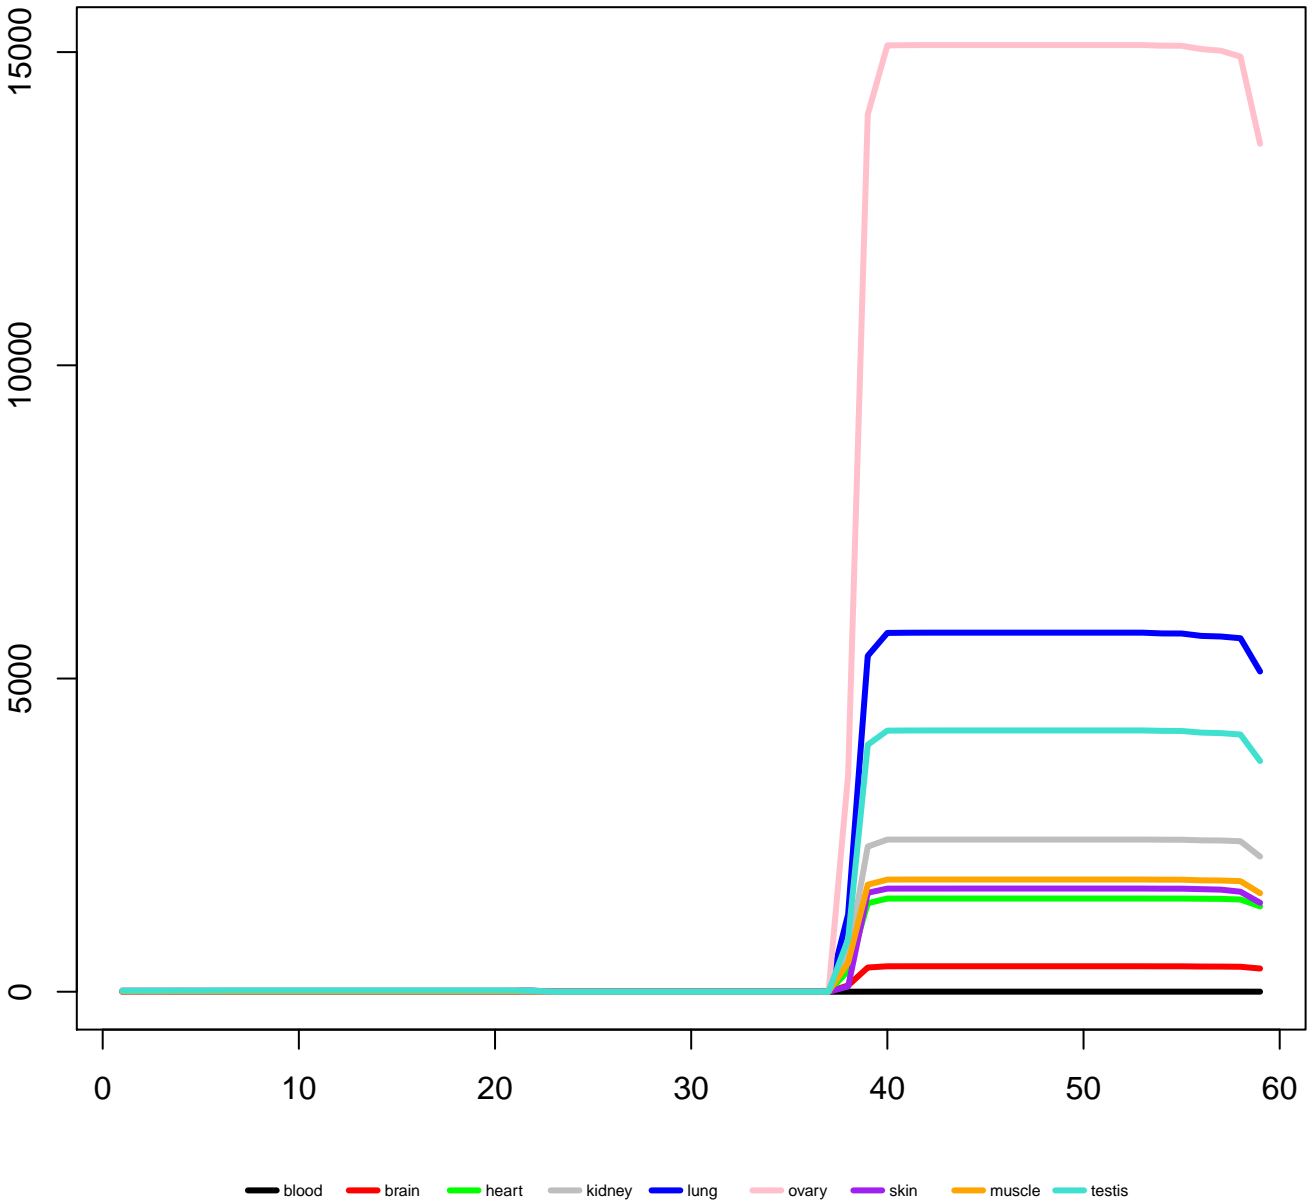

# 9\_58301314-58301373(-)\_cfa-mir-181b-2\_high

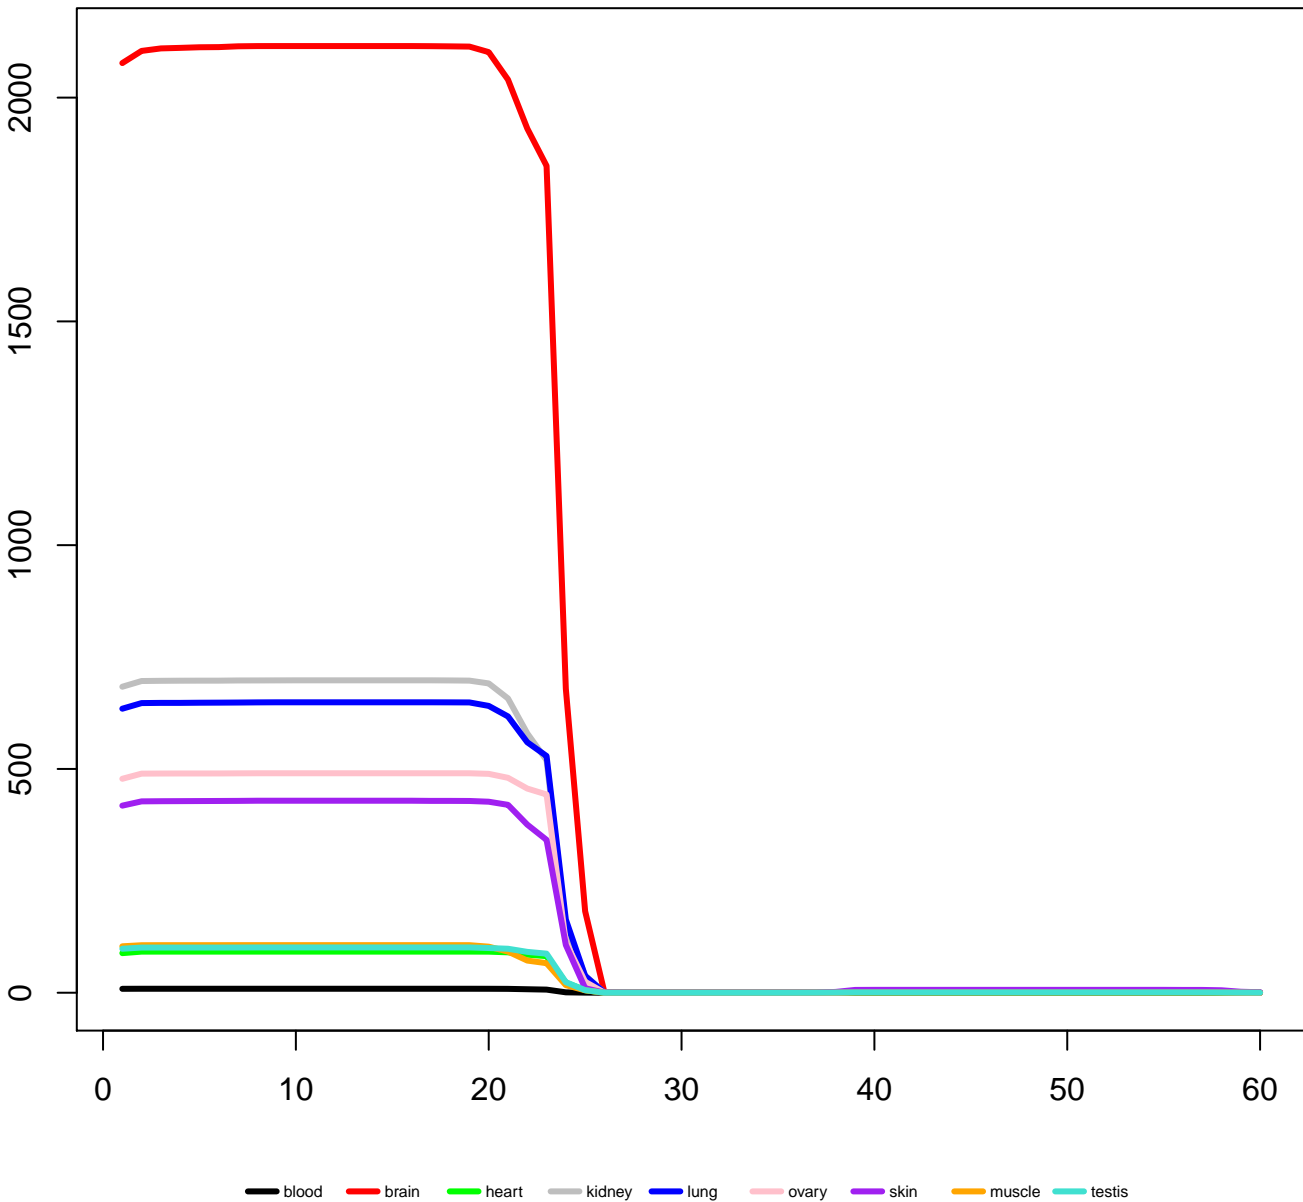



# AAEX03022212\_16938-17031(+)\_mir-8841\_low

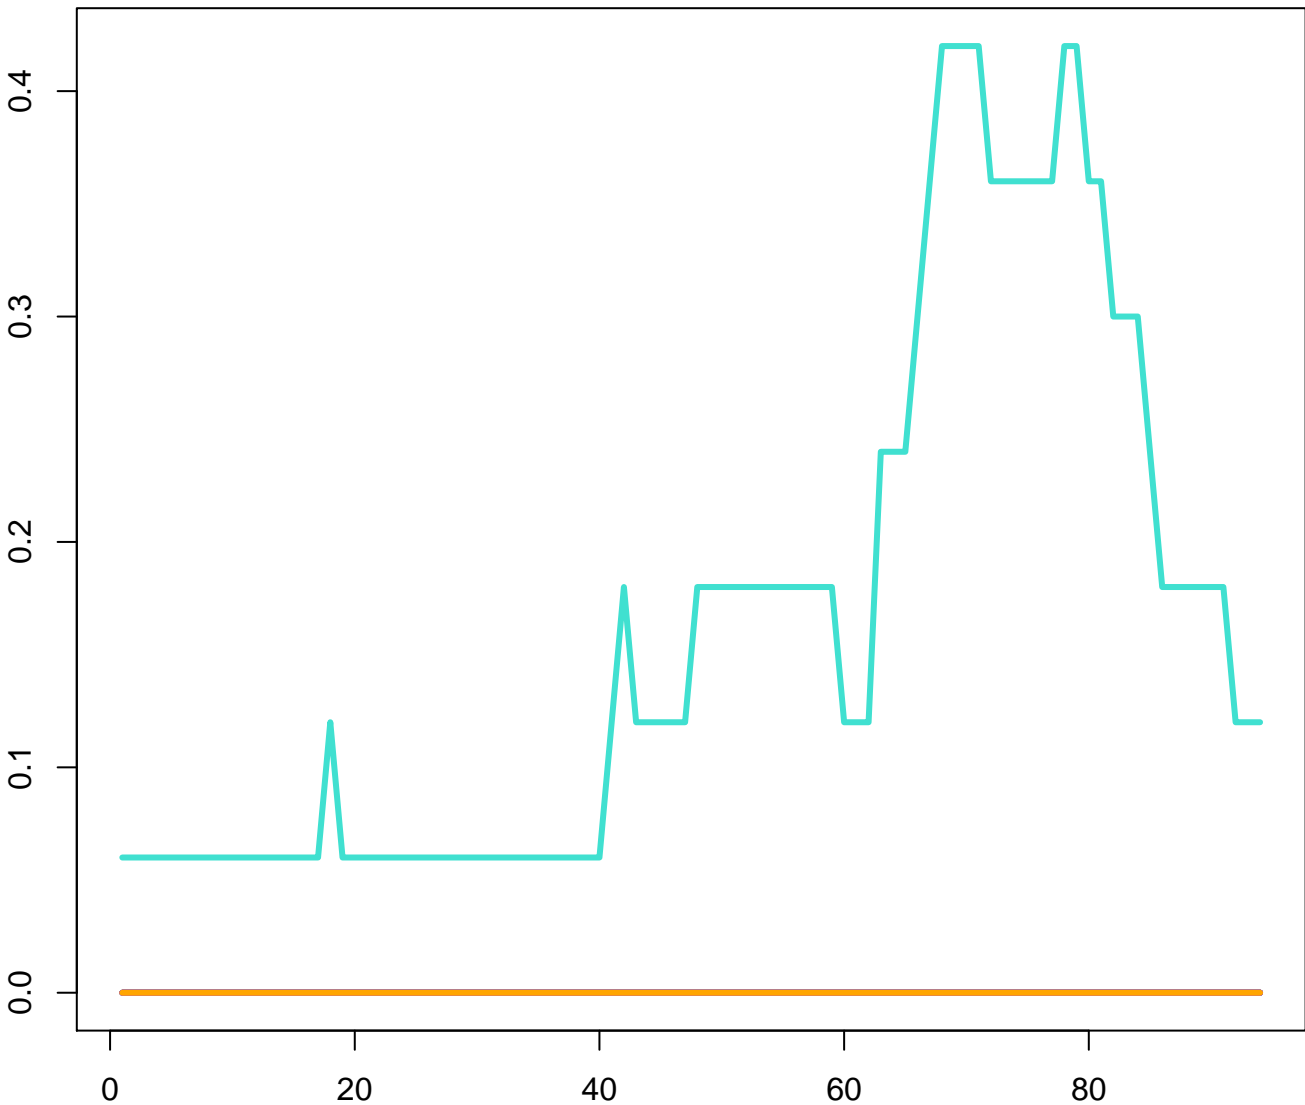

— blood — brain — heart — kidney — lung — ovary — skin — muscle — testis



# AAEX03024228\_2238-2348(+)\_cfa-mir-8896\_low

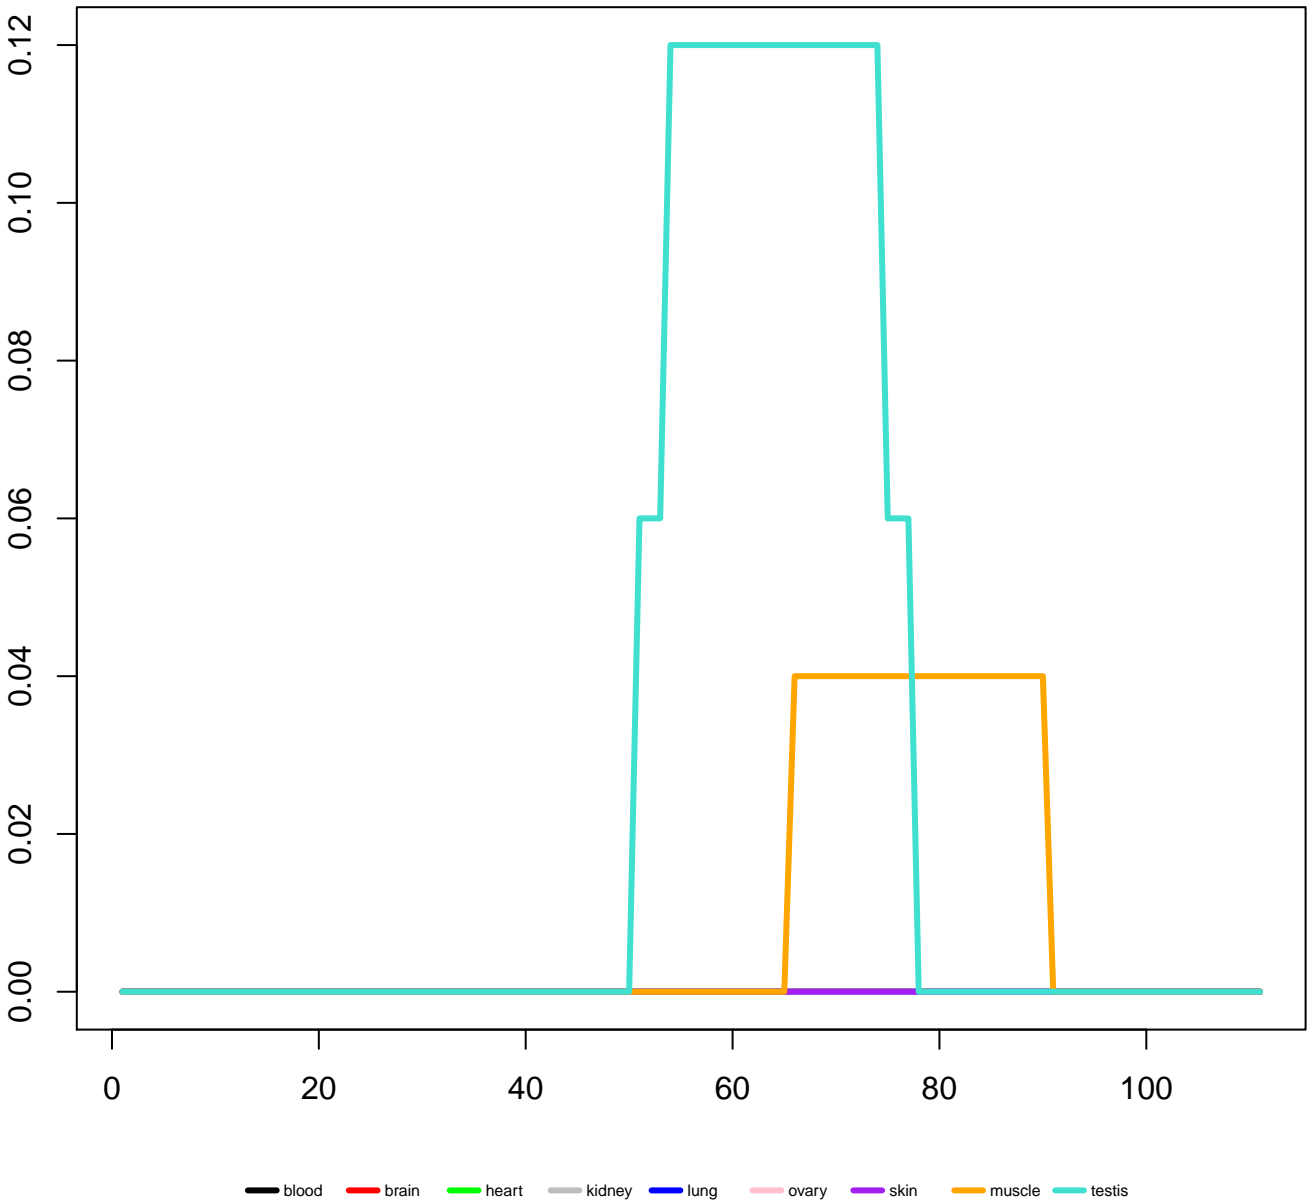









# AAEX03025132\_5588-5655(-)\_mir-2904\_low

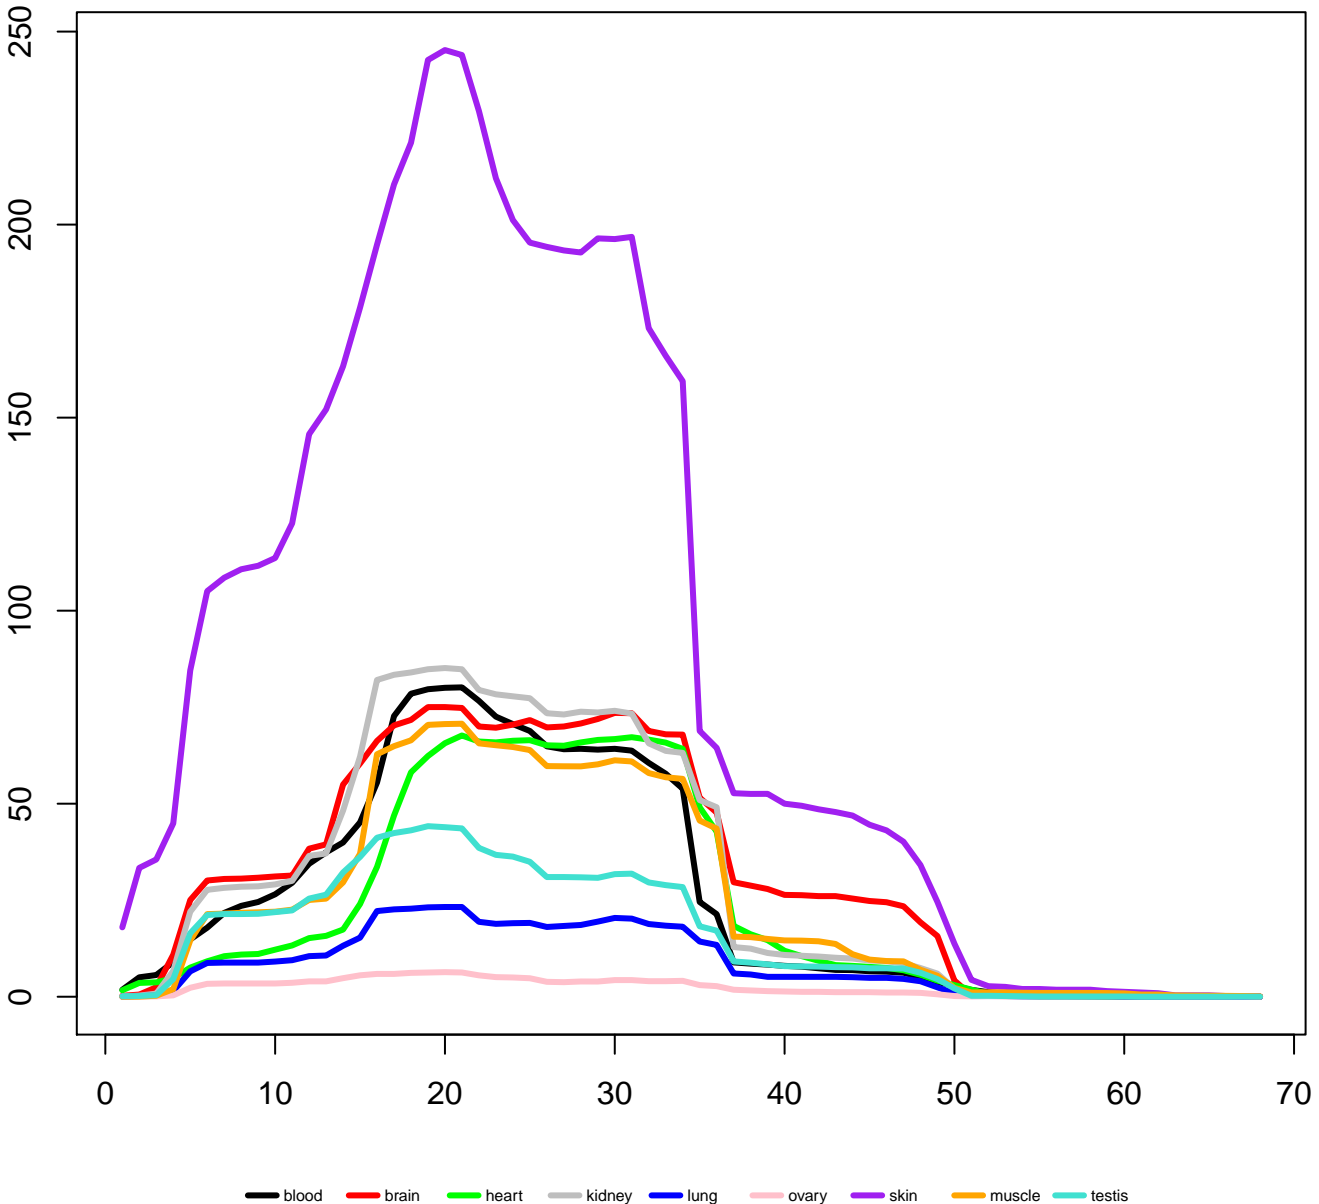

— blood — brain — heart — kidney — lung — ovary — skin — muscle — testis





# AAEX03025644\_1229-1296(+)\_mir-2904\_low



— blood — brain — heart — kidney — lung — ovary — skin — muscle — testis



# AAEX03025866\_3500-3606(+)\_mir-8865\_low

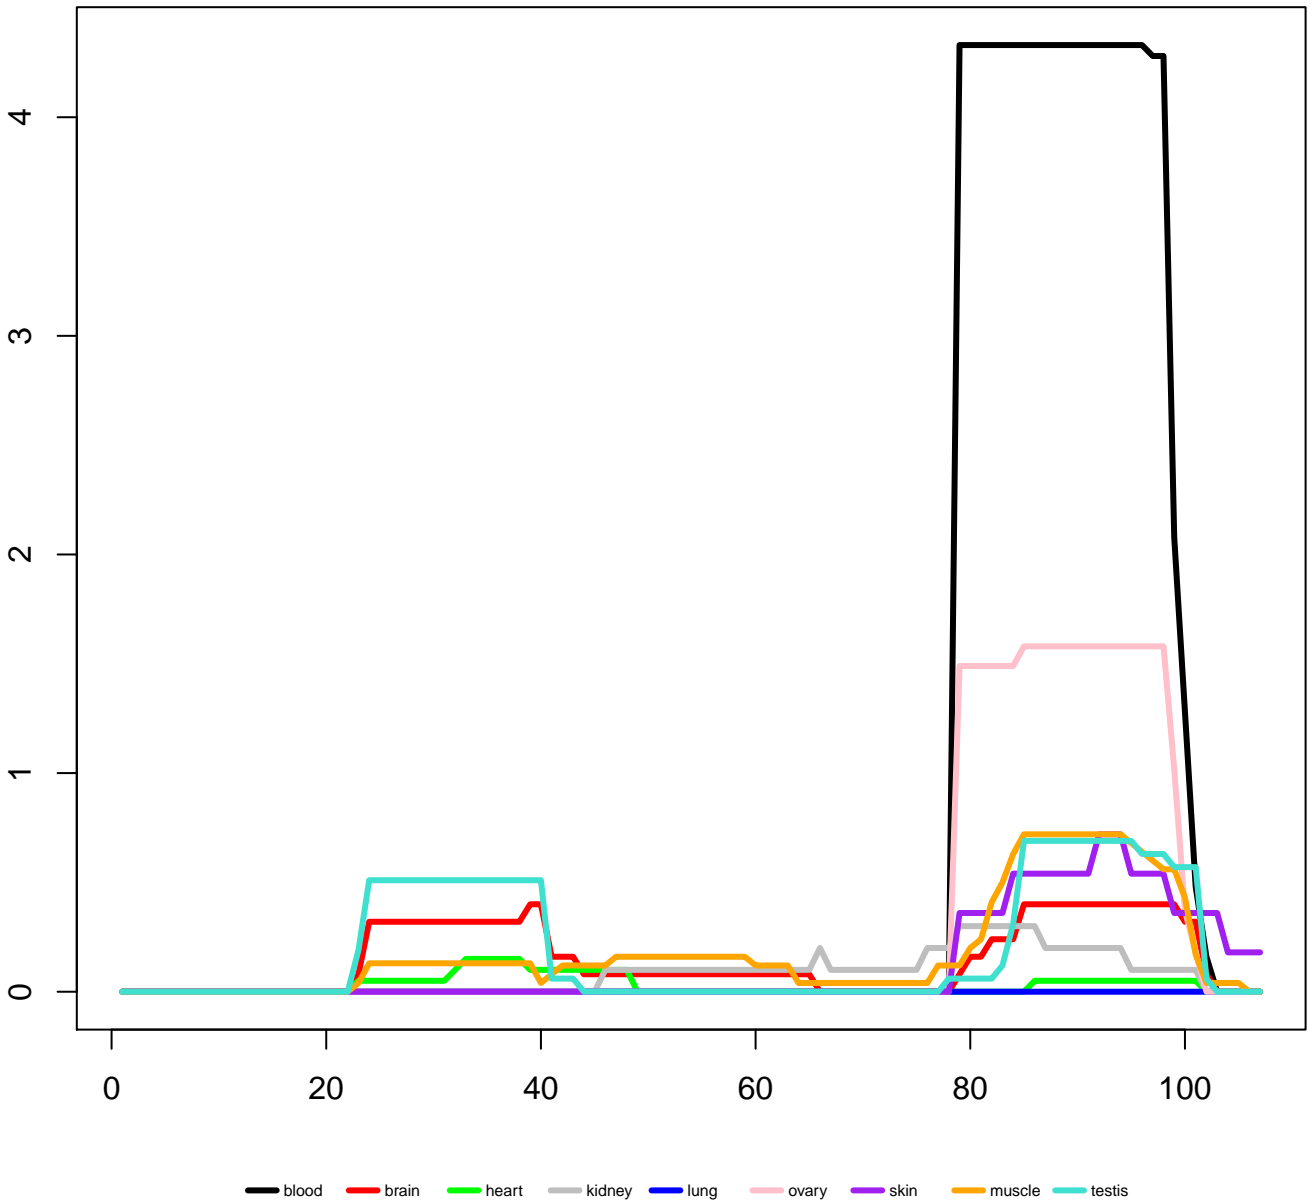

# JH373239\_456681-456782(+)\_mir-8793\_low

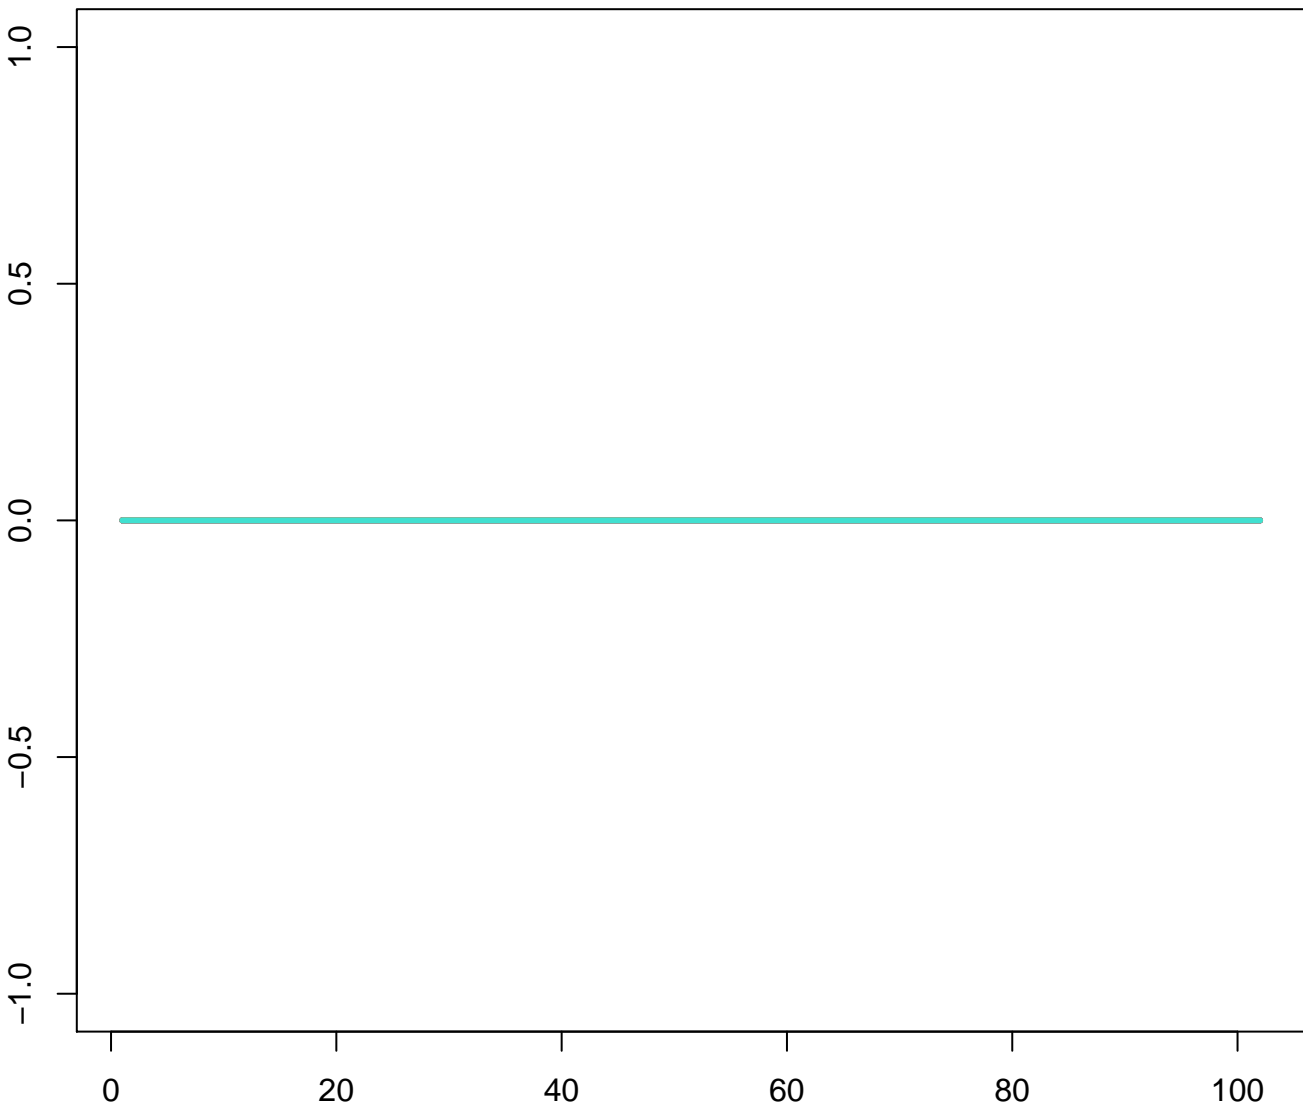

blood brain heart kidney lung ovary skin muscle testis



# JH373239\_484473-484601(+)\_mir-8907\_low

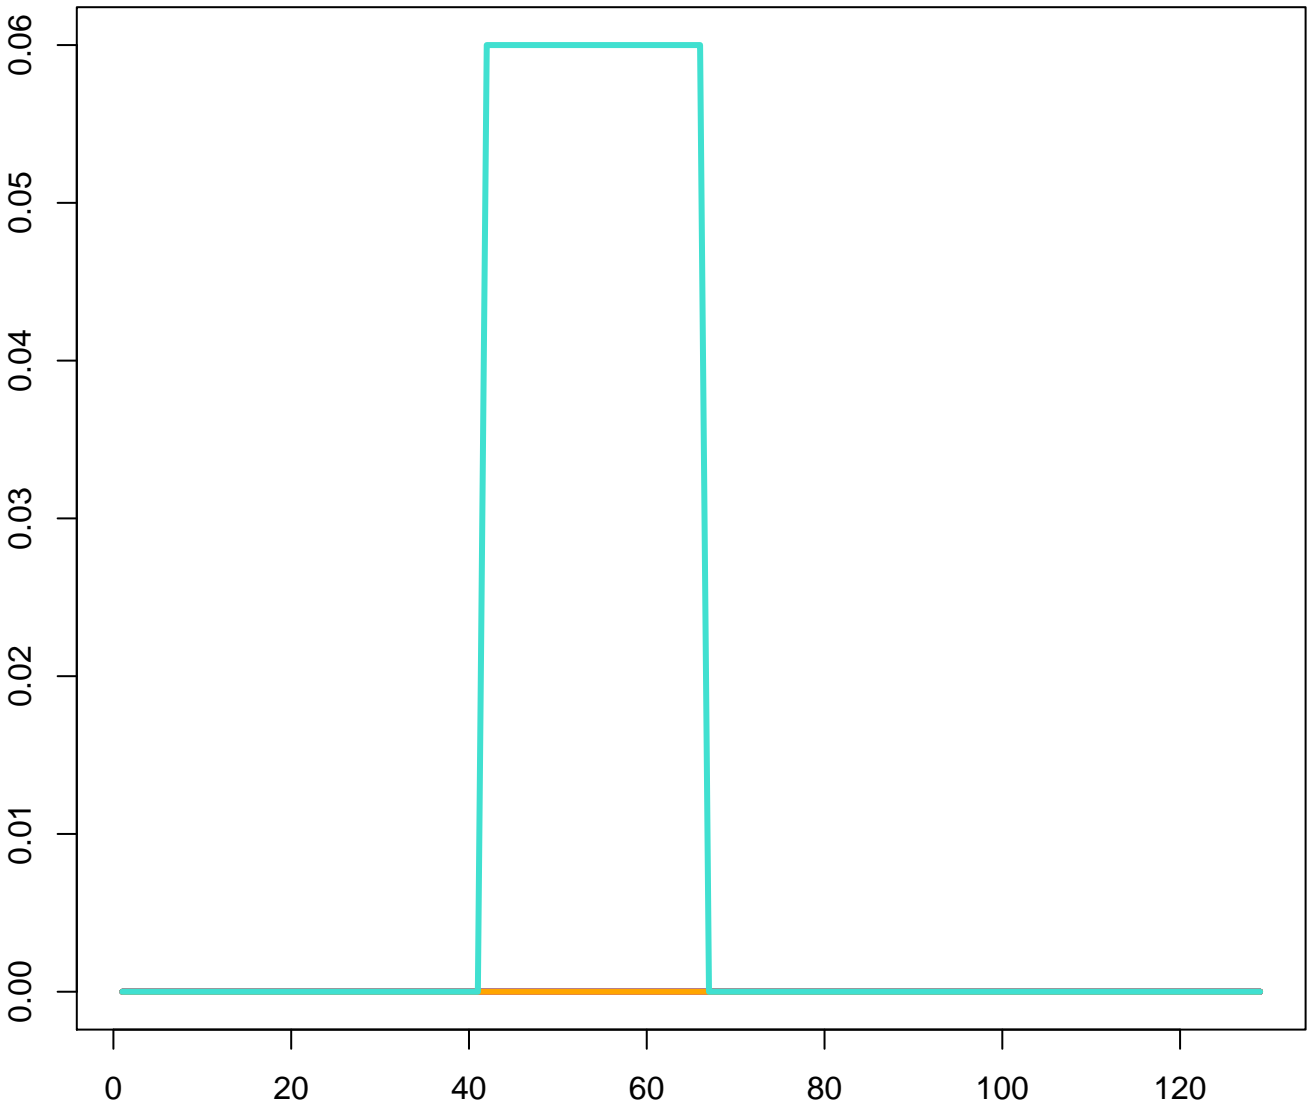

blood brain heart kidney lung ovary skin muscle testis

# JH373319\_81142-81254(-)\_mir-8794\_low



# JH373319\_98211-98315(-)\_mir-8793\_low



# JH373319\_109588-109720(-)\_mir-8852\_low

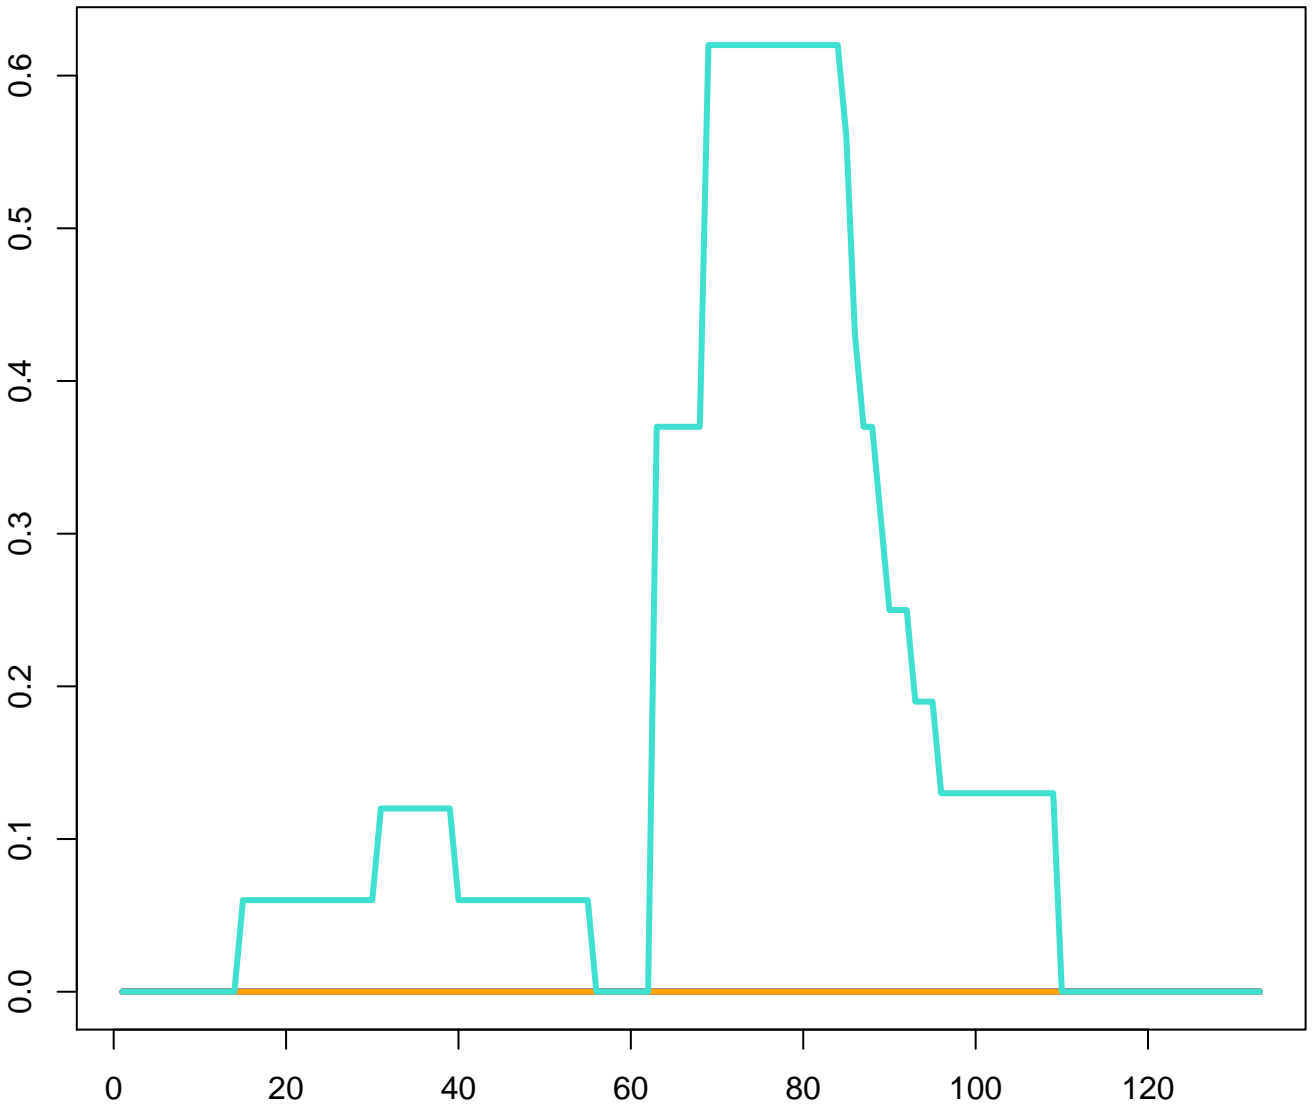

— blood — brain — heart — kidney — lung — ovary — skin — muscle — testis

# JH373377\_11739-11853(-)\_cfa-mir-8869\_low



blood brain heart kidney lung ovary skin muscle testis



# JH373389\_15358-15486(-)\_cfa-mir-8907\_low

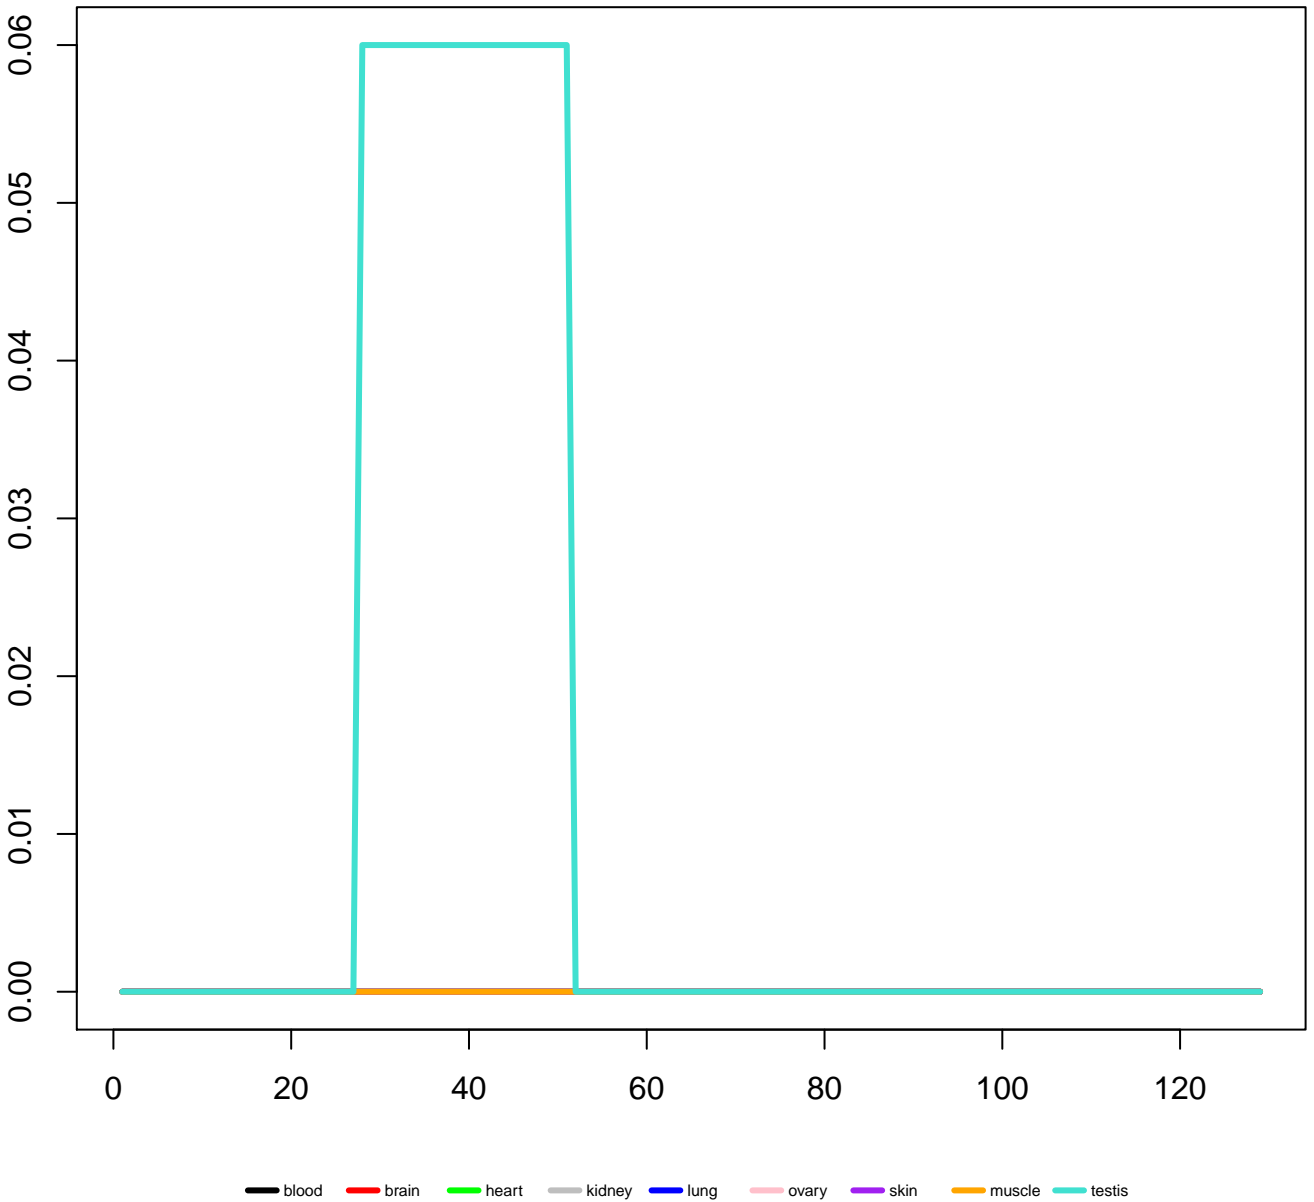

# JH373389\_61631-61765(-)\_mir-8906\_low

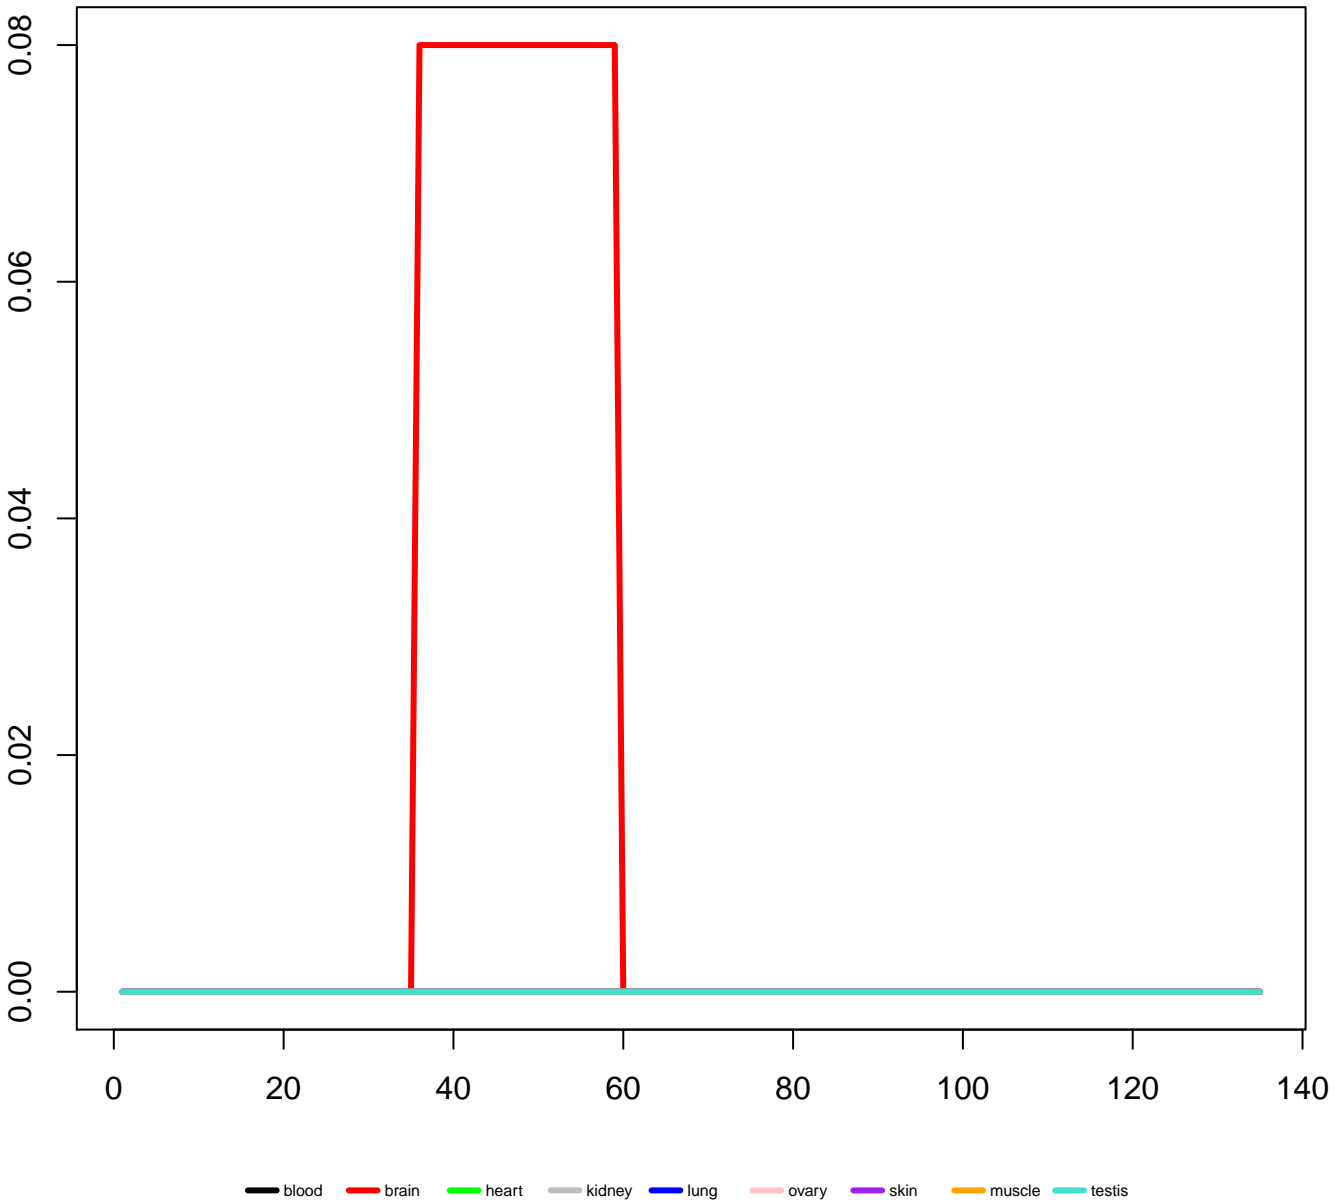



# JH373412\_34331-34443(-)\_mir-8864\_low

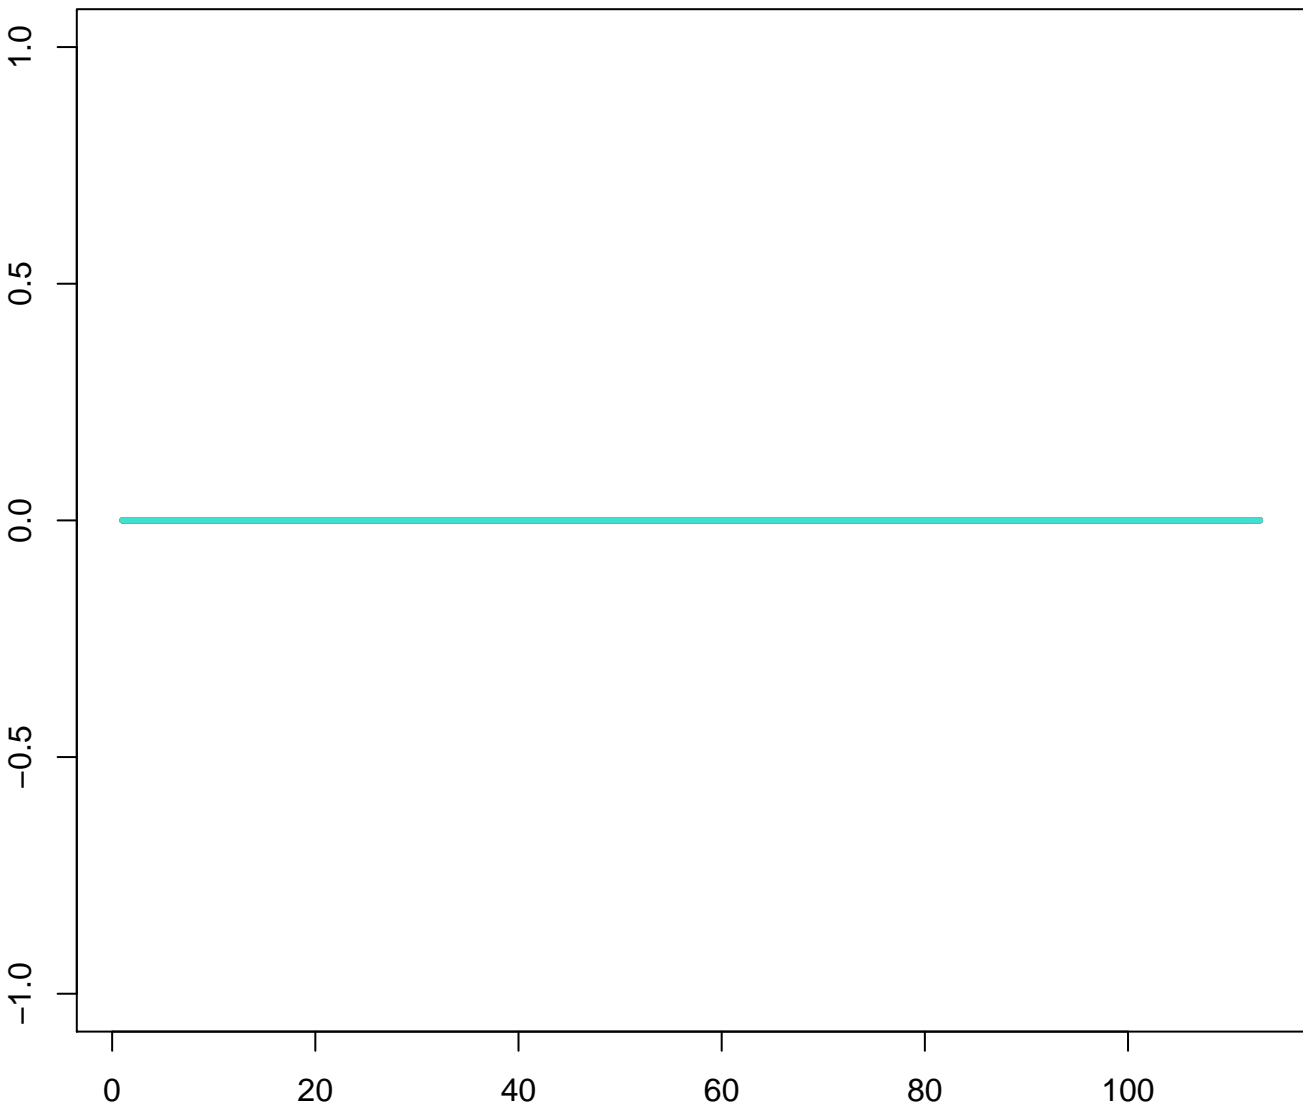

blood brain heart kidney lung ovary skin muscle testis

# JH373426\_11694-11838(-)\_mir-8862\_low



blood brain heart kidney lung ovary skin muscle testis

# JH373426\_19686-19820(-)\_mir-8906\_low



# JH373426\_37343-37471(-)\_mir-8907\_low

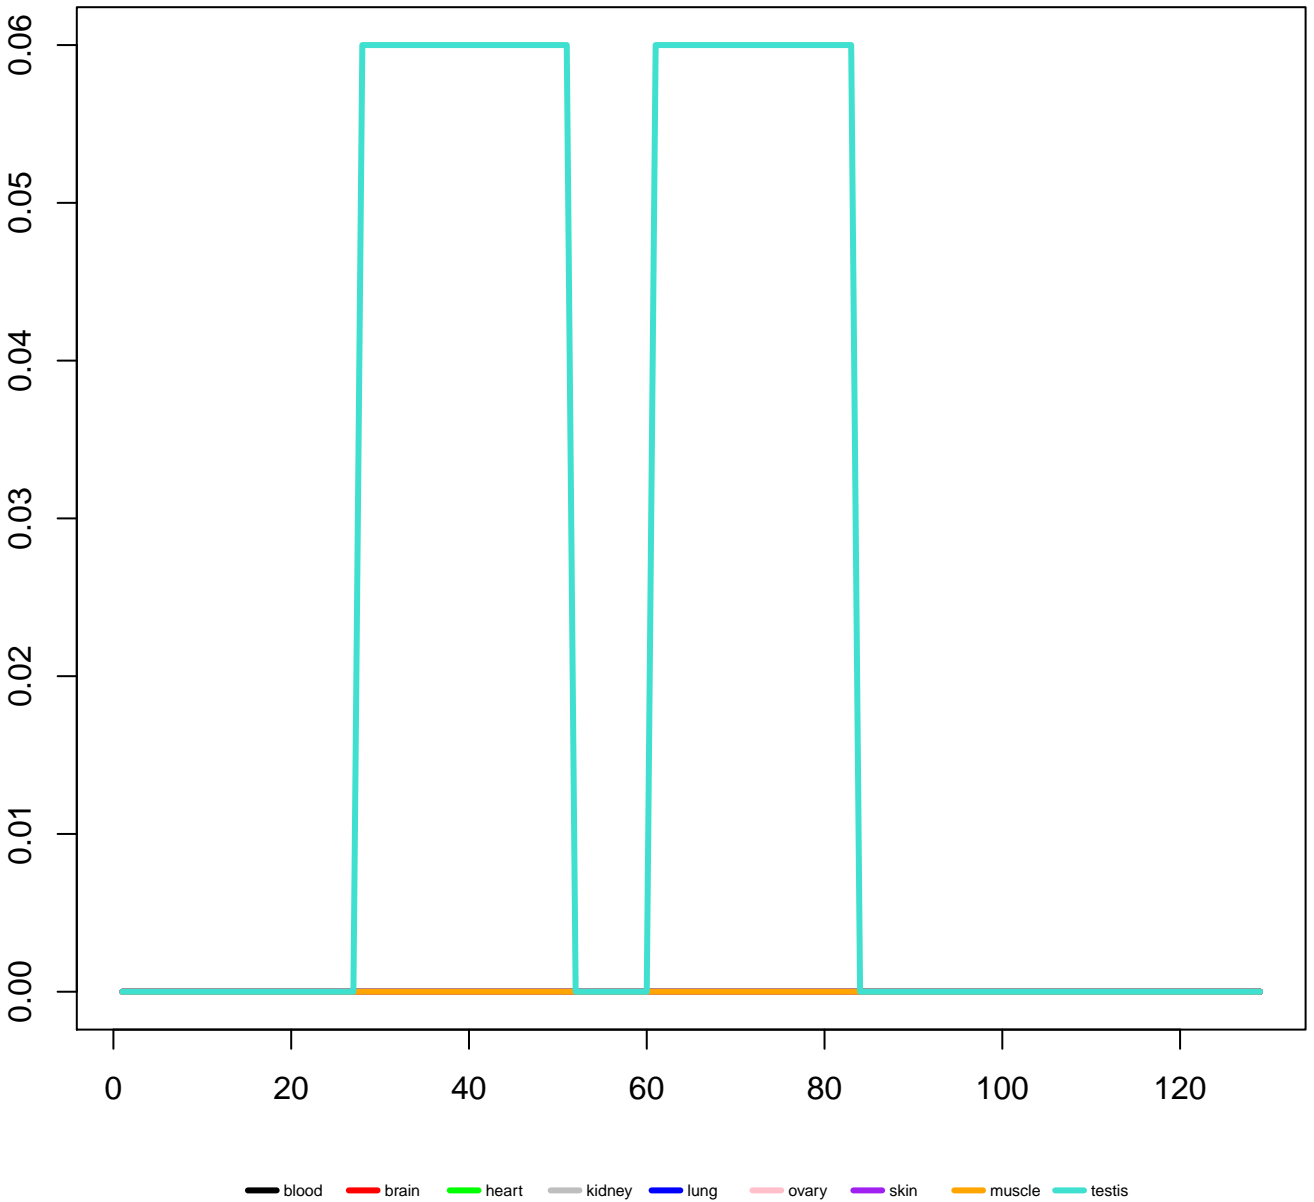

# JH373432\_27872-27984(+)\_mir-8864\_low



blood brain heart kidney lung ovary skin muscle testis

# JH373475\_25818-25922(+)\_mir-8793\_low



# JH373475\_34171-34265(+)\_cfa-mir-8849\_low

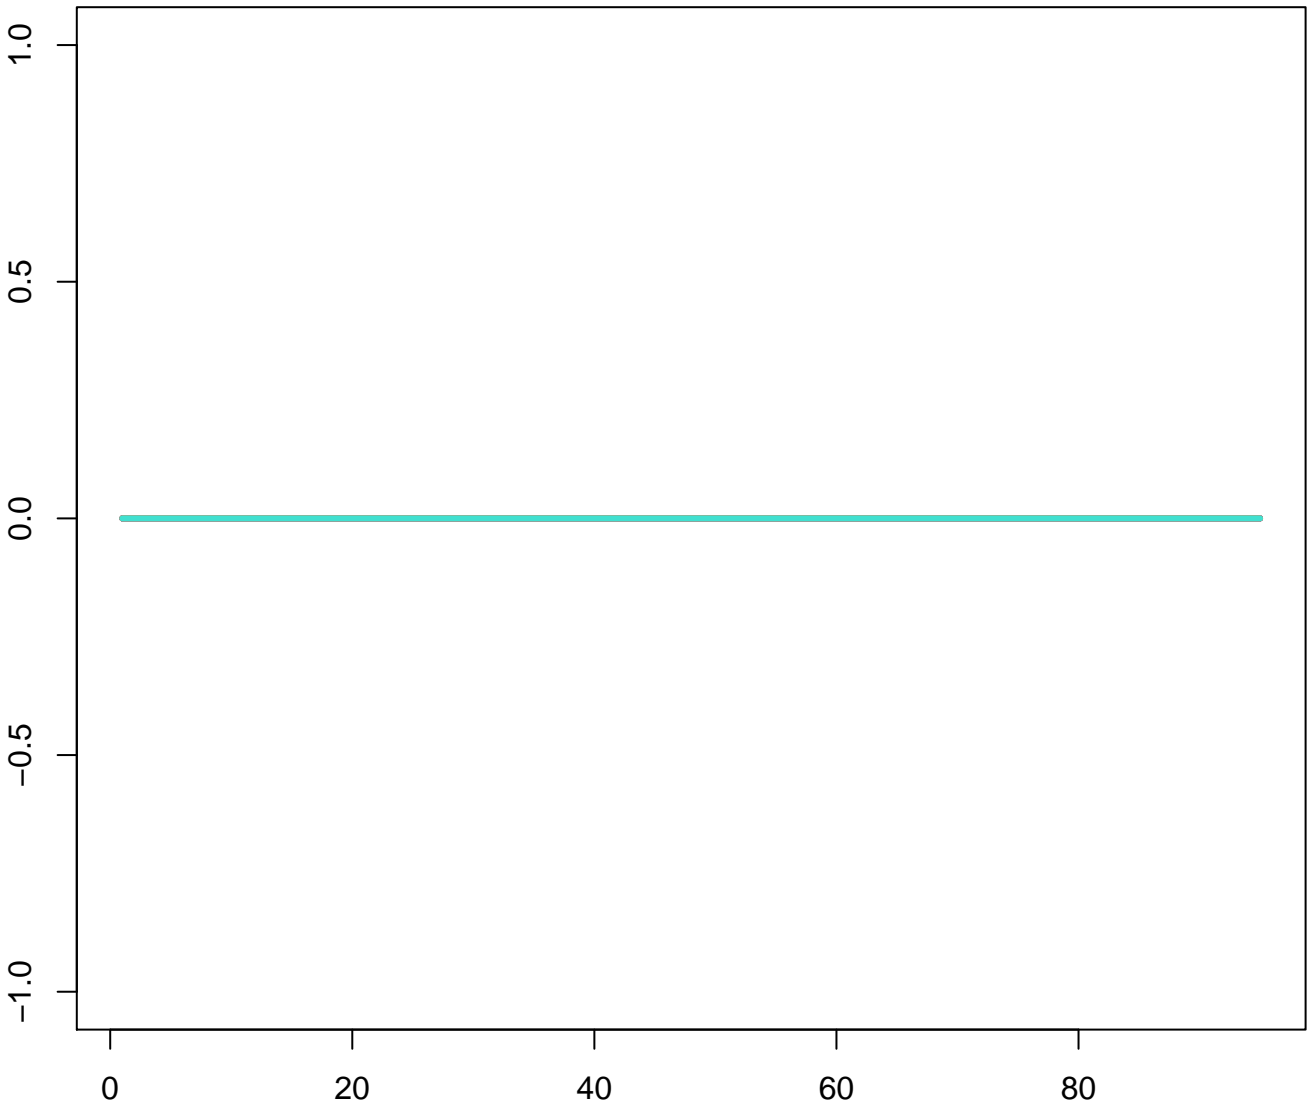

blood brain heart kidney lung ovary skin muscle testis

# JH373475\_42635-42763(+)\_mir-8907\_low





# JH373475\_45815-45927(+)\_mir-8794\_low

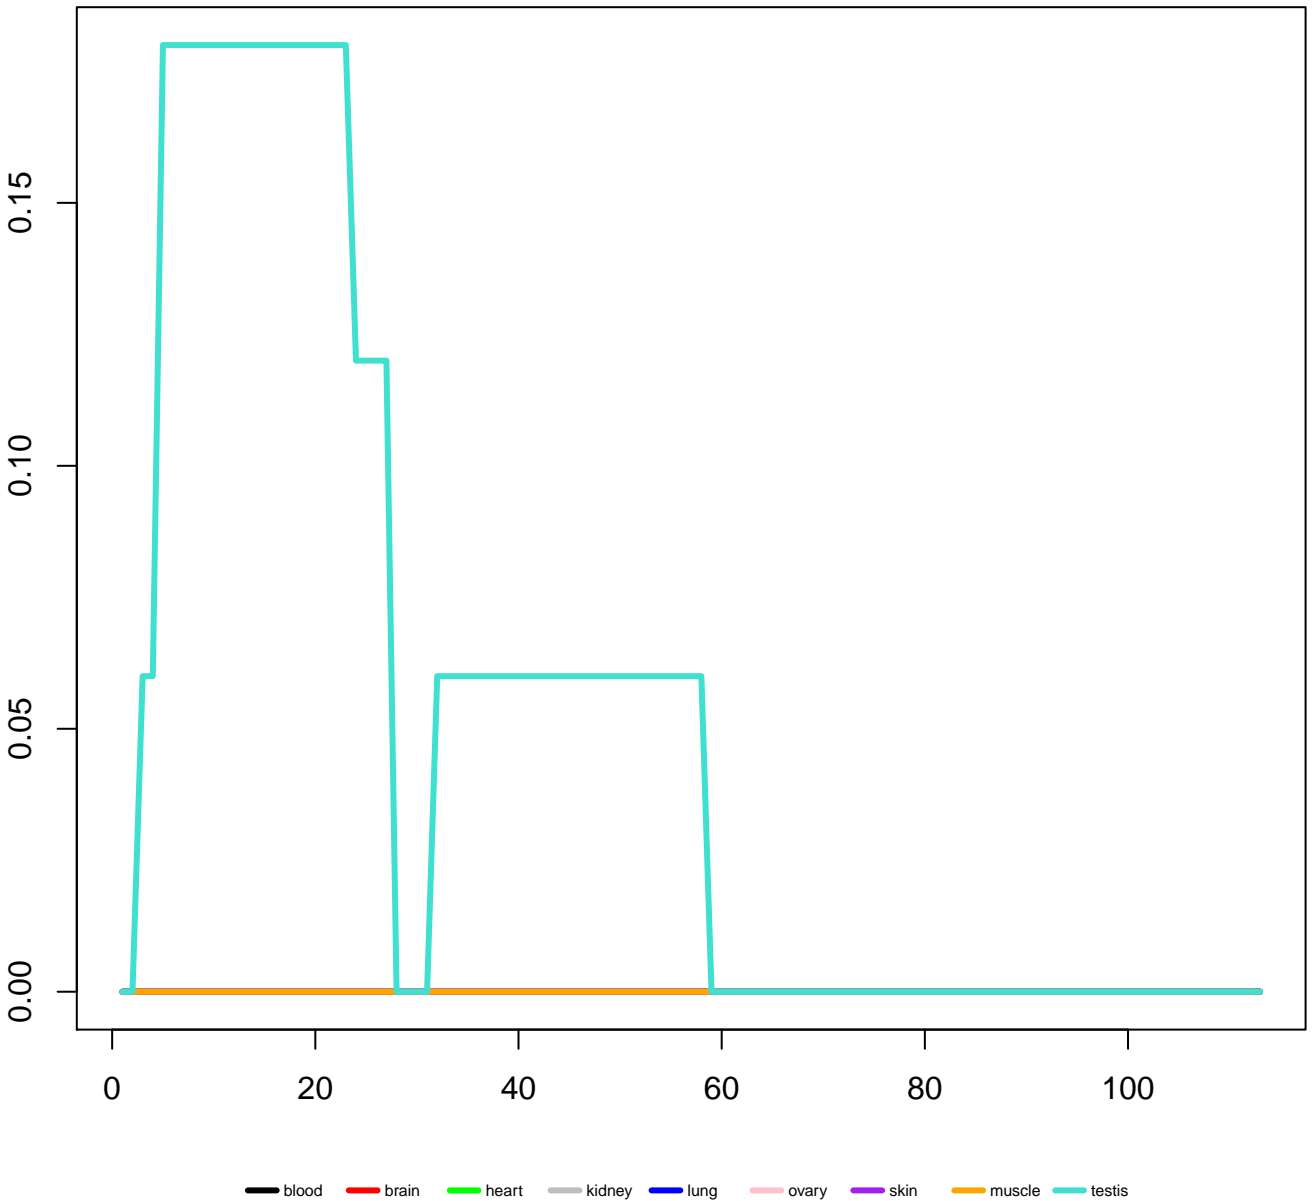

# JH373485\_14855-14922(-)\_mir-2904\_low

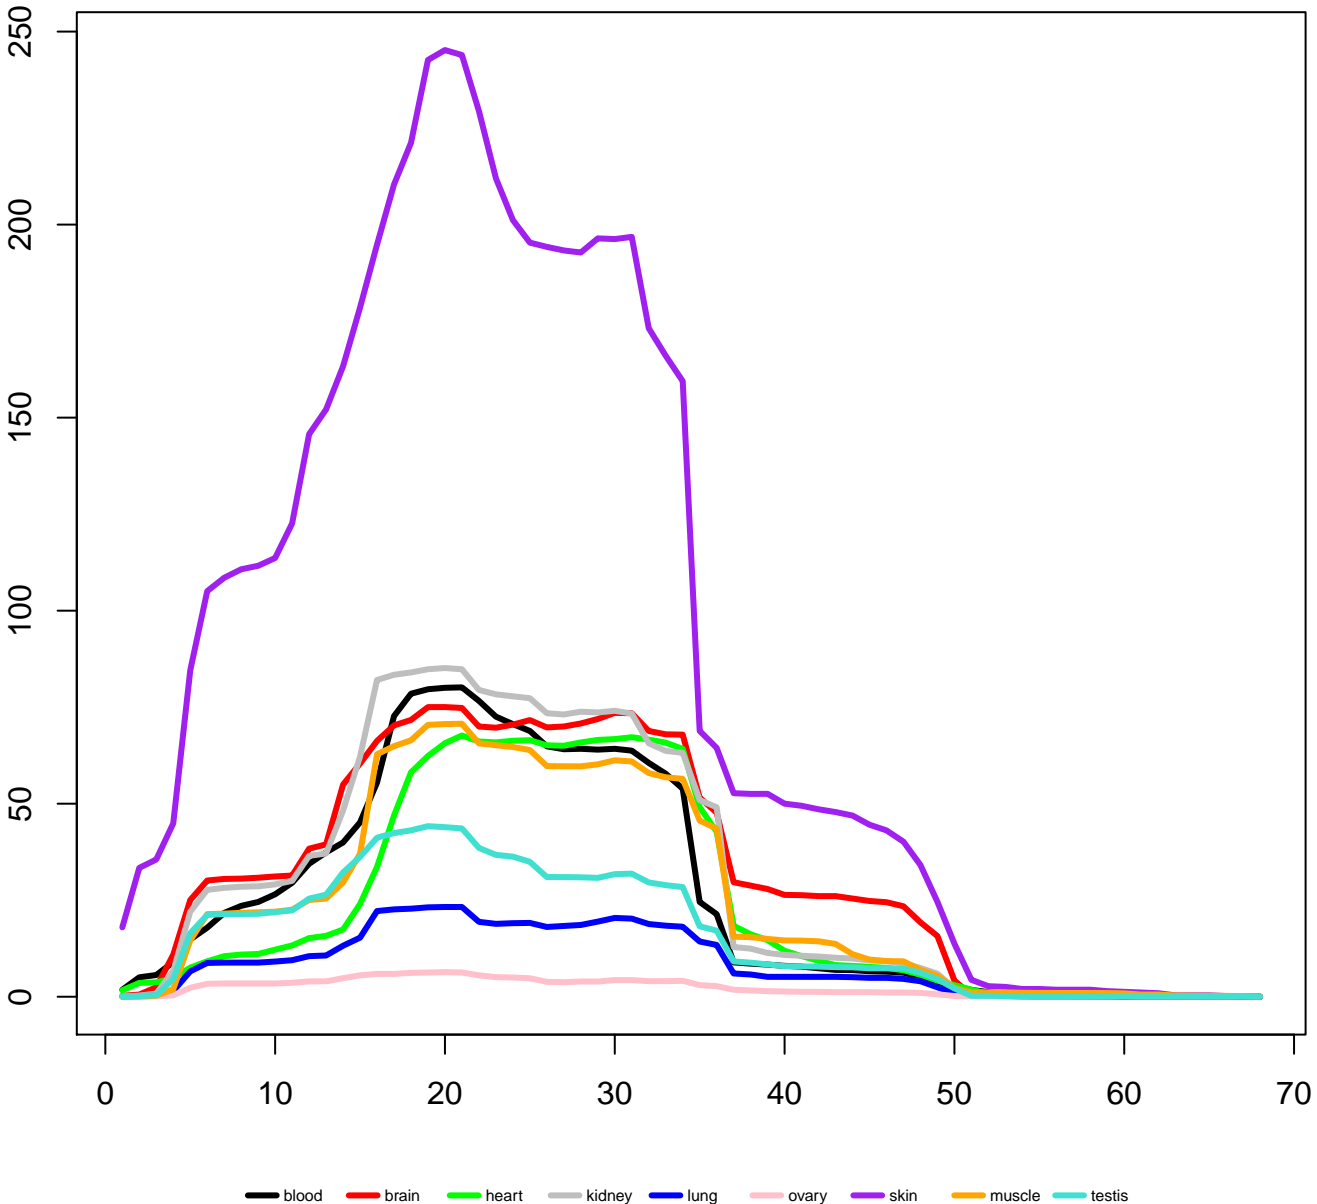

— blood — brain — heart — kidney — lung — ovary — skin — muscle — testis

# JH373485\_22229-22335(-)\_mir-8865\_low

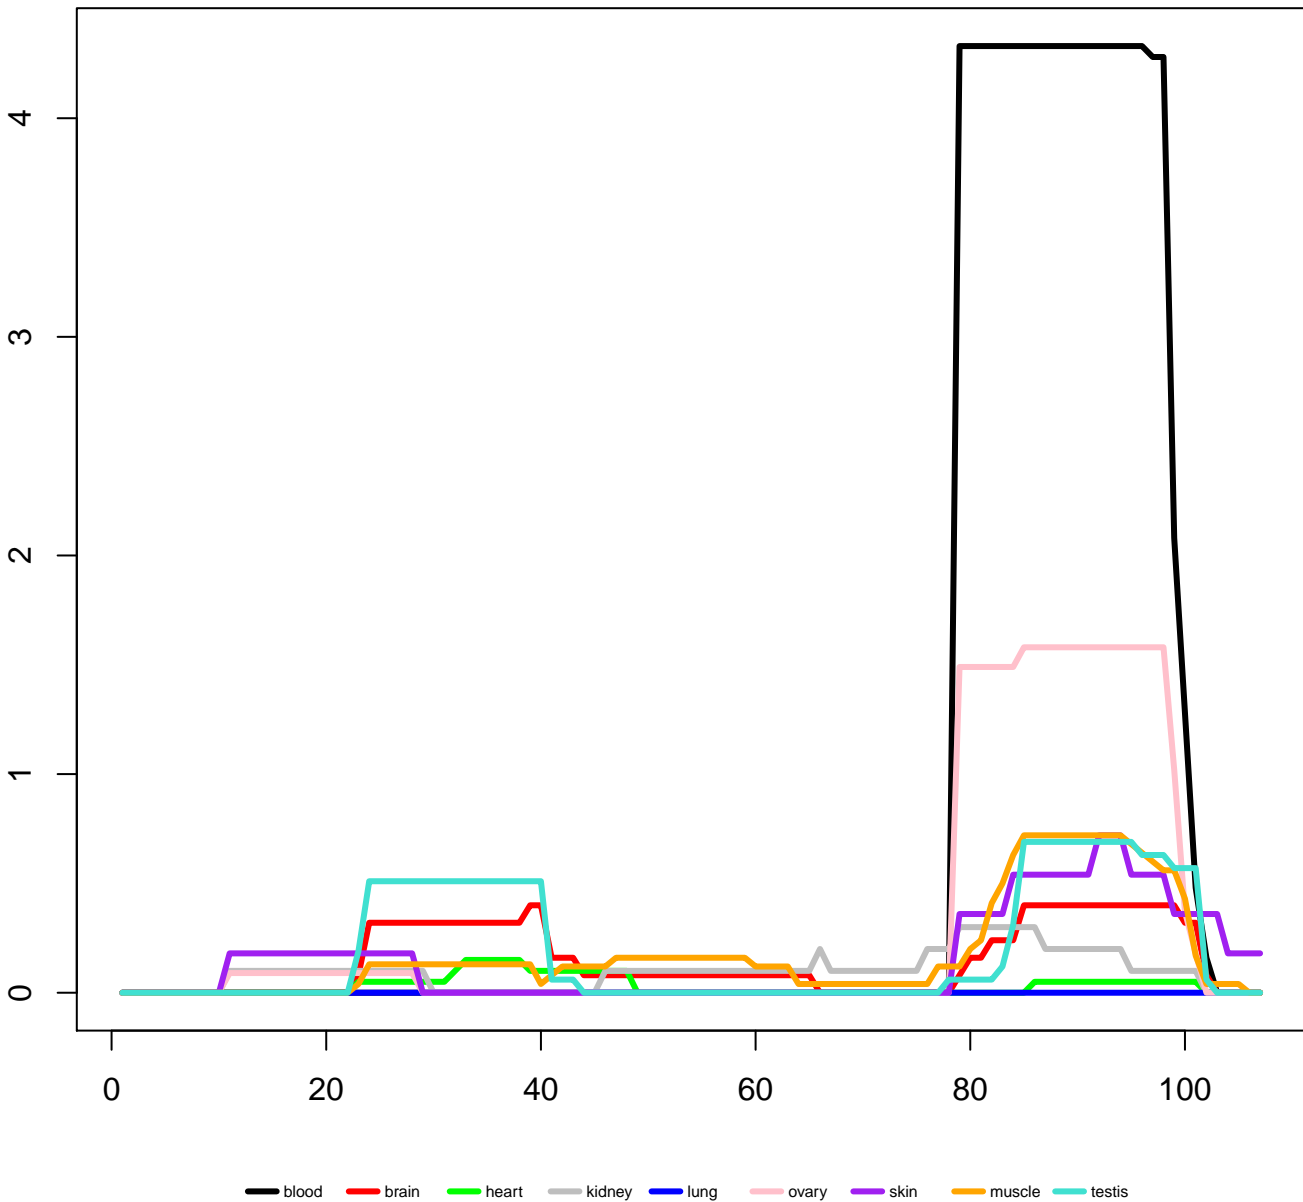

# JH373579\_13947-14091(+)\_mir-8862\_low



blood brain heart kidney lung ovary skin muscle testis

# JH373600\_19752-19828(+)\_mir-8793\_low

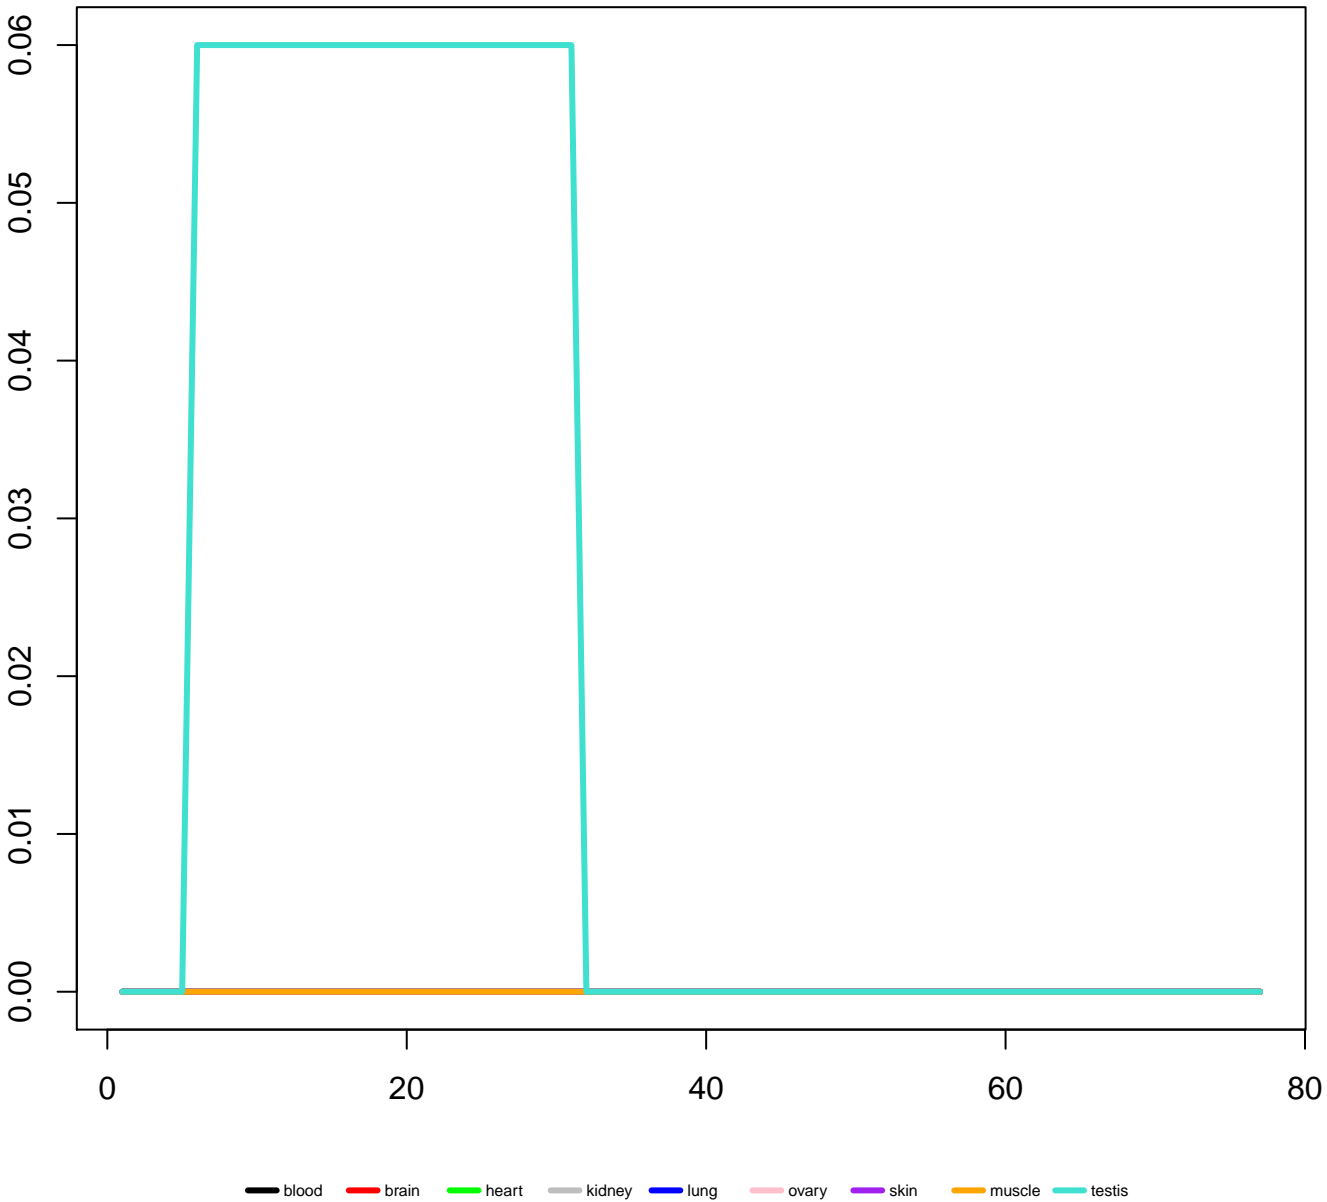

# JH373600\_27983-28077(+)\_cfa-mir-8849\_low



blood brain heart kidney lung ovary skin muscle testis



# JH373668\_7412-7475(+)\_mir-8908b\_high

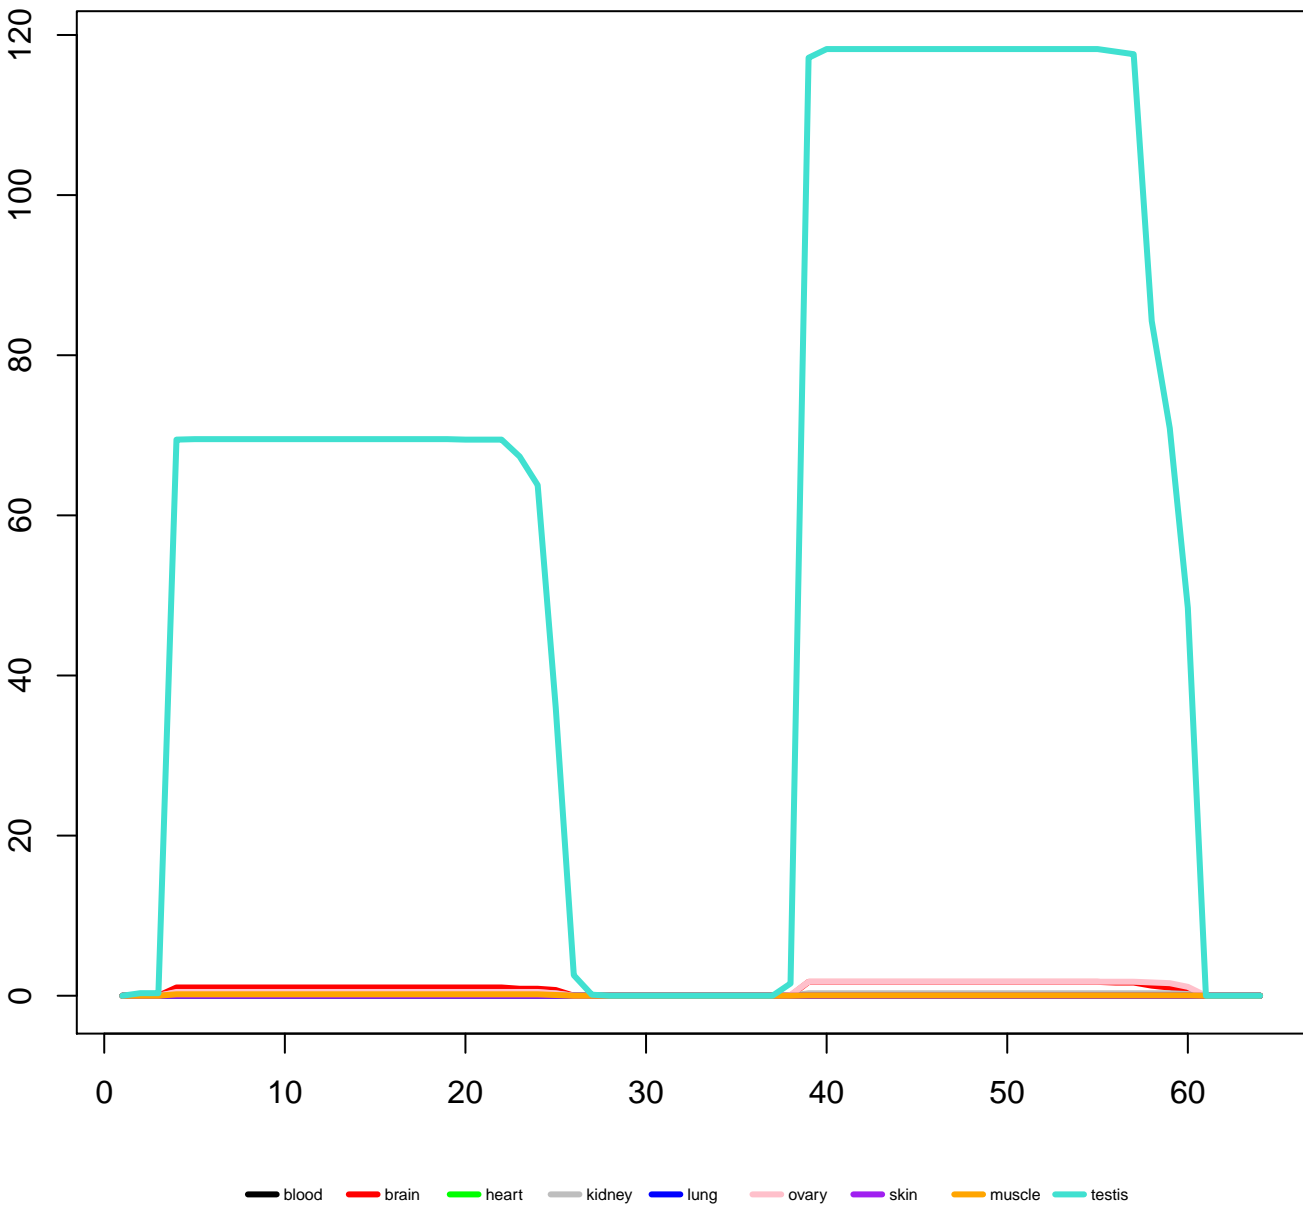





# JH373668\_23671-23753(+)\_mir-8908\_high

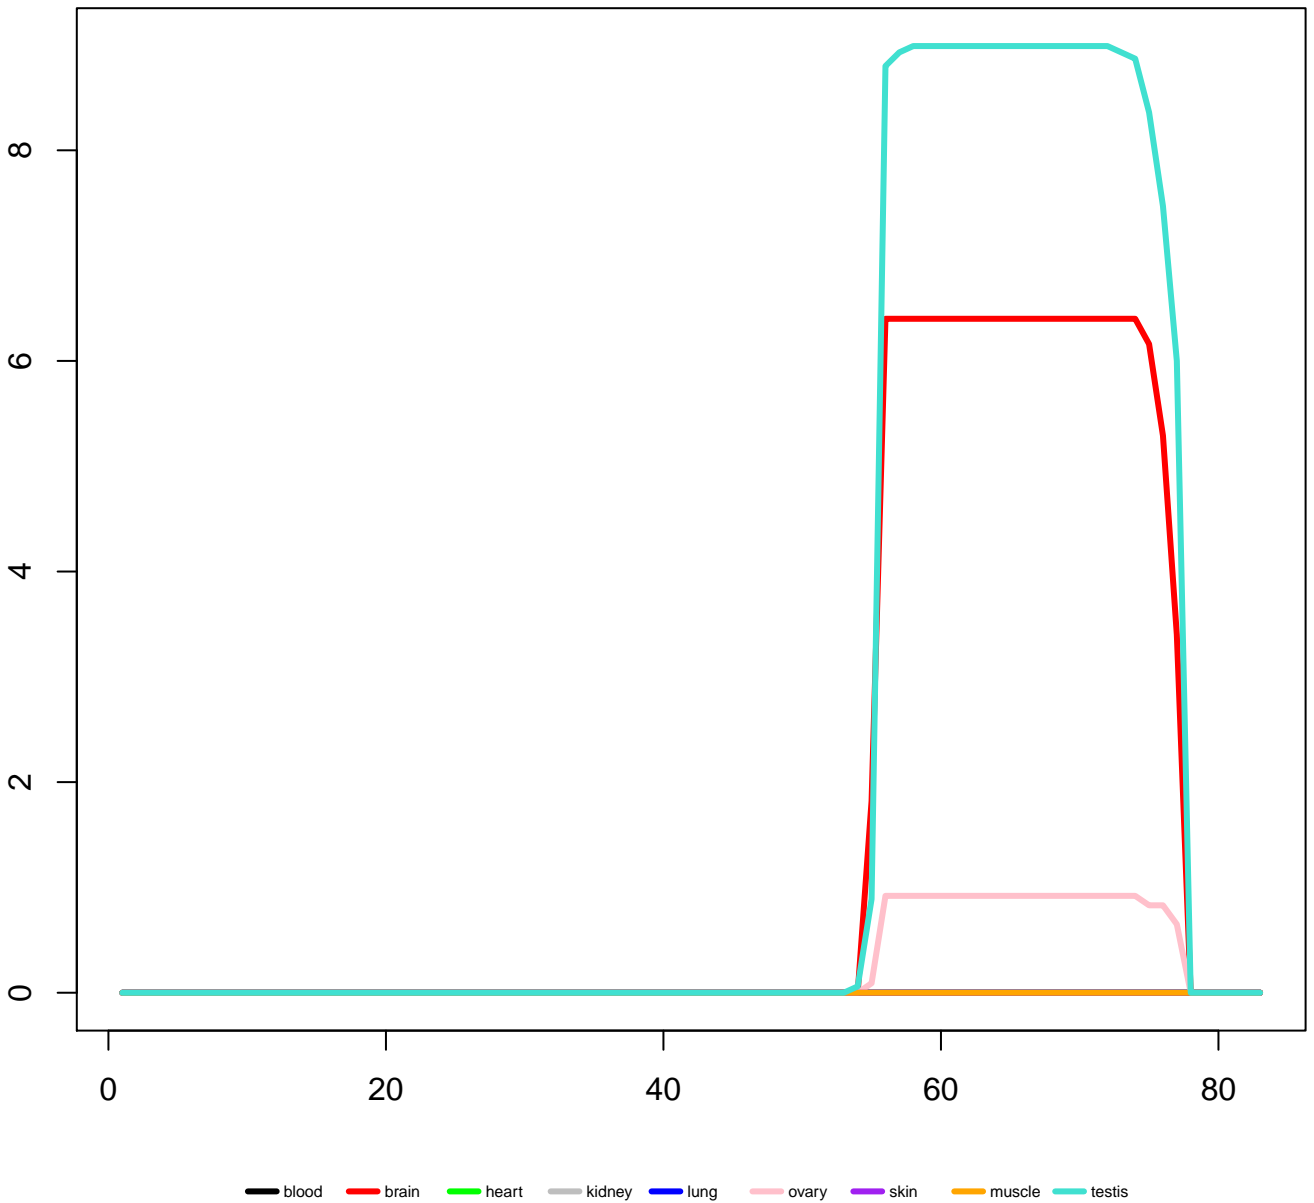

# JH373721\_20094-20238(-)\_mir-8905\_low

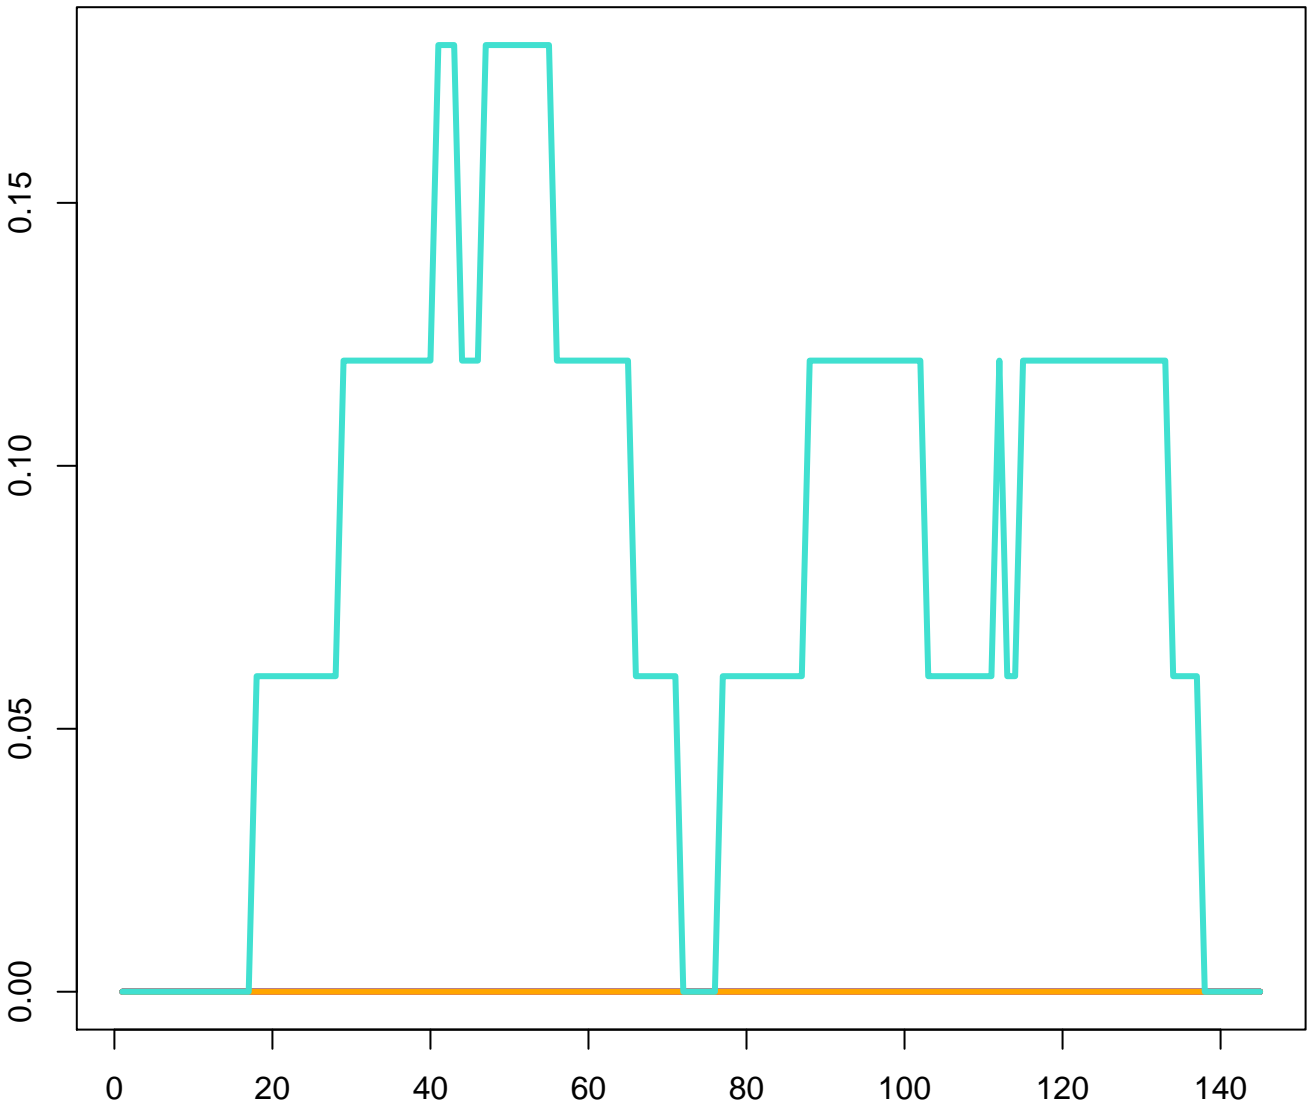

— blood — brain — heart — kidney — lung — ovary — skin — muscle — testis

# JH373733\_3510-3621(-)\_cfa-mir-8863\_low

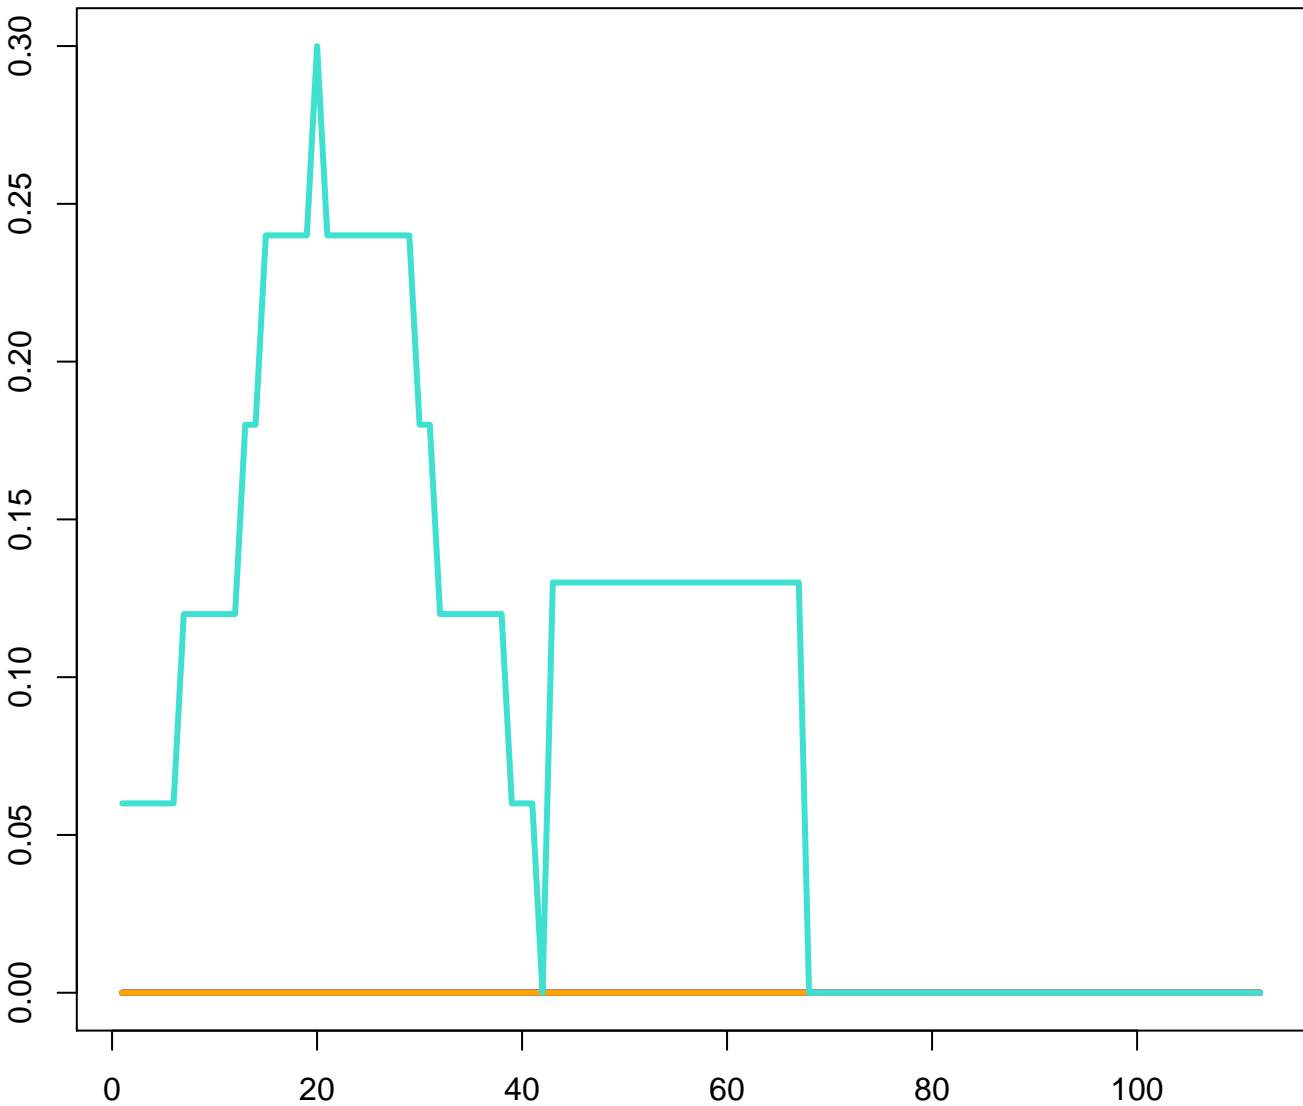

blood brain heart kidney lung ovary skin muscle testis

# JH373733\_12166-12278(-)\_mir-8794\_low



# JH373758\_16181-16275(+)\_mir-8841\_low

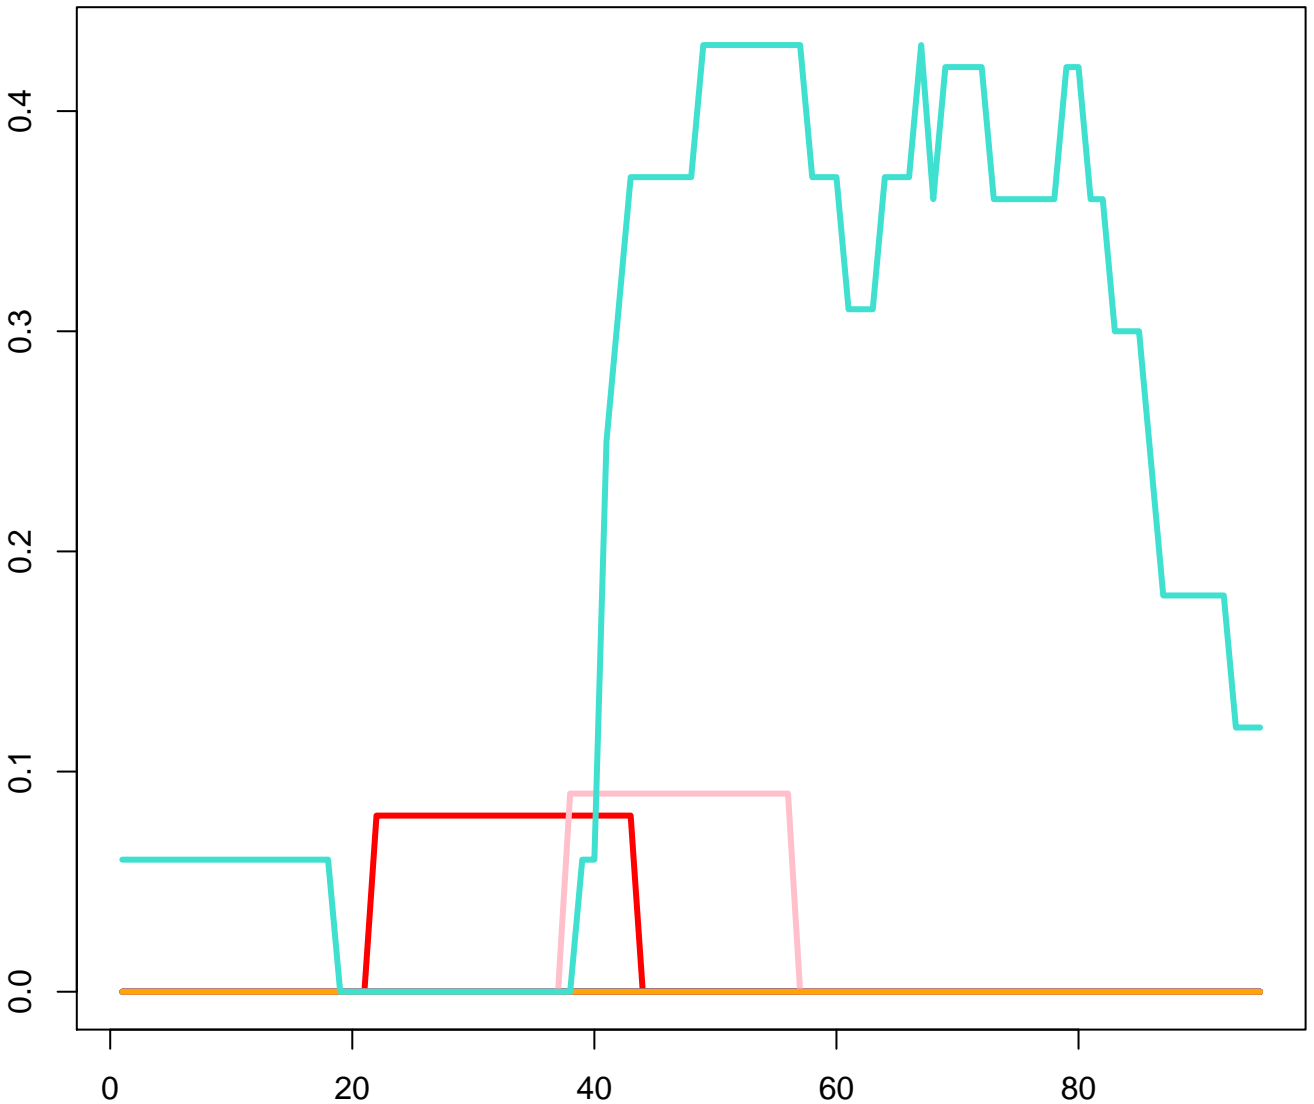

— blood — brain — heart — kidney — lung — ovary — skin — muscle — testis

# JH373785\_7319-7377(+)\_cfa-mir-1837-3\_high

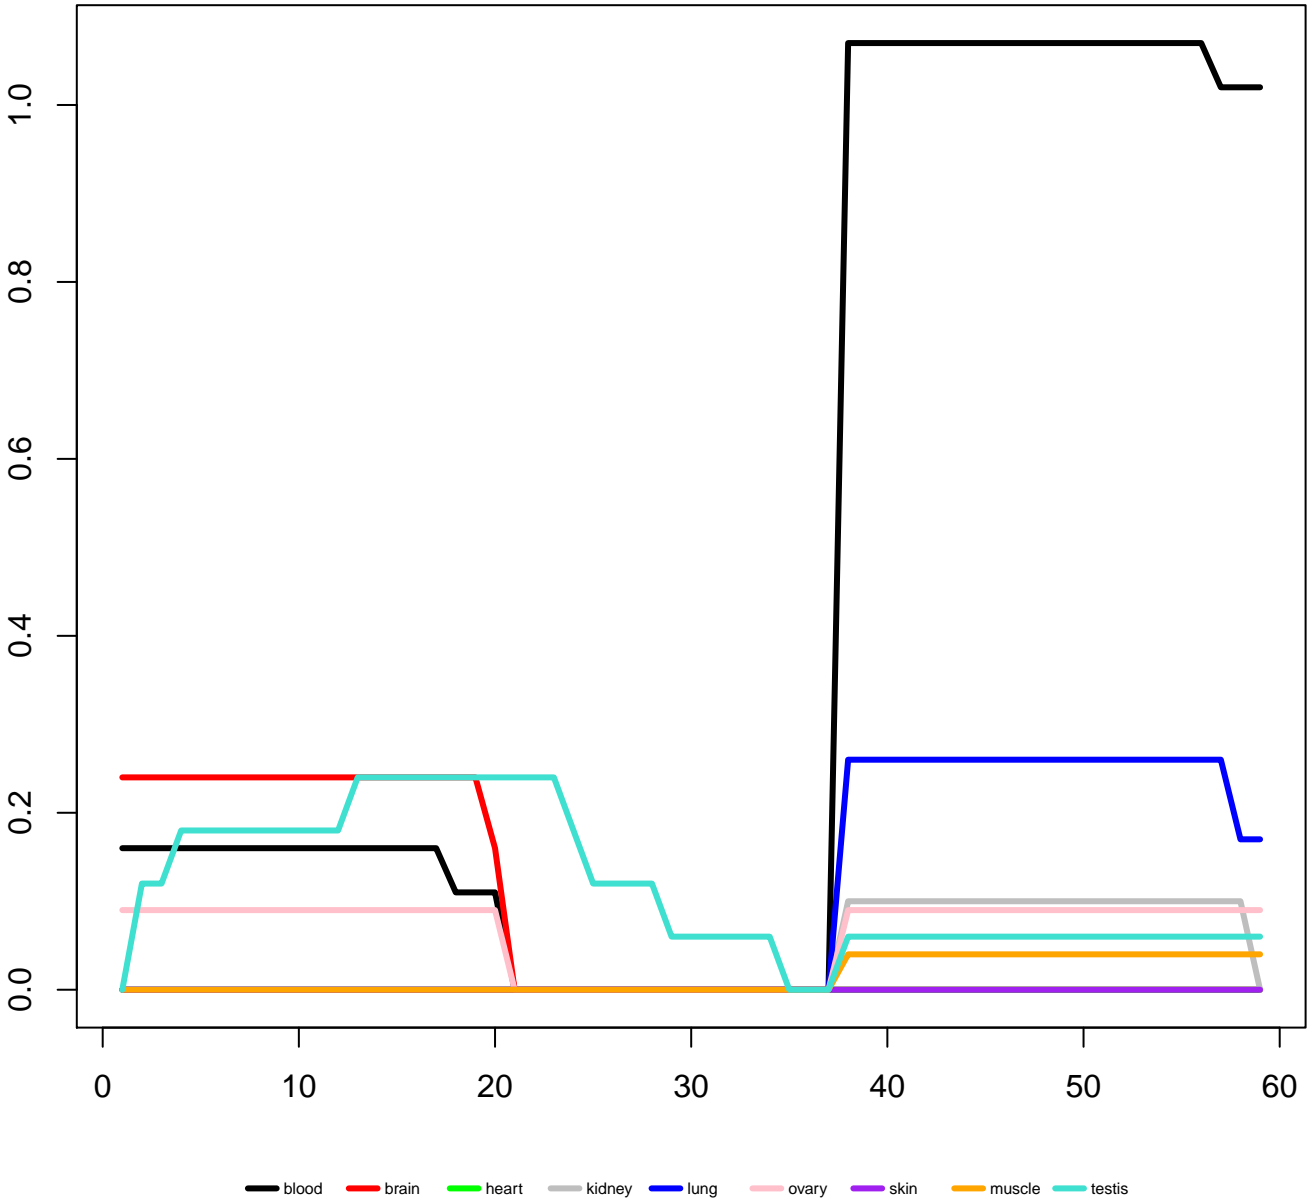

# JH373864\_5187-5299(+)\_mir-8864\_low



blood brain heart kidney lung ovary skin muscle testis



# JH374064\_3469-3581(+)\_mir-8864\_low



blood brain heart kidney lung ovary skin muscle testis

# JH374091\_8441-8524(-)\_cfa-mir-133b\_high

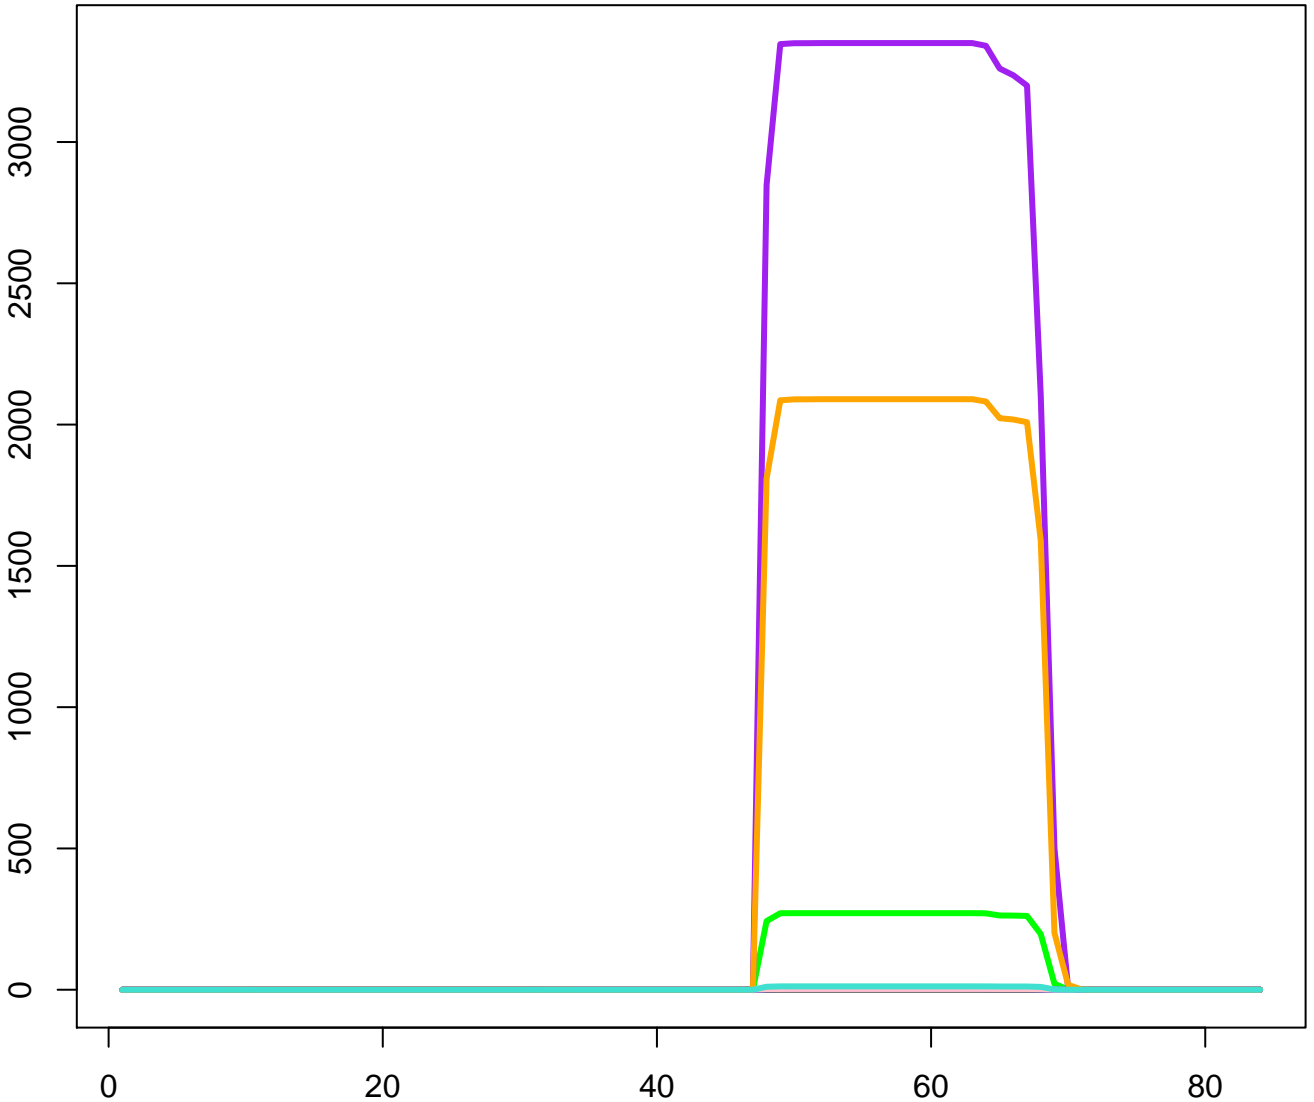

— blood — brain — heart — kidney — lung — ovary — skin — muscle — testis

# X\_39523890-39523951(-)\_cfa-mir-221\_high

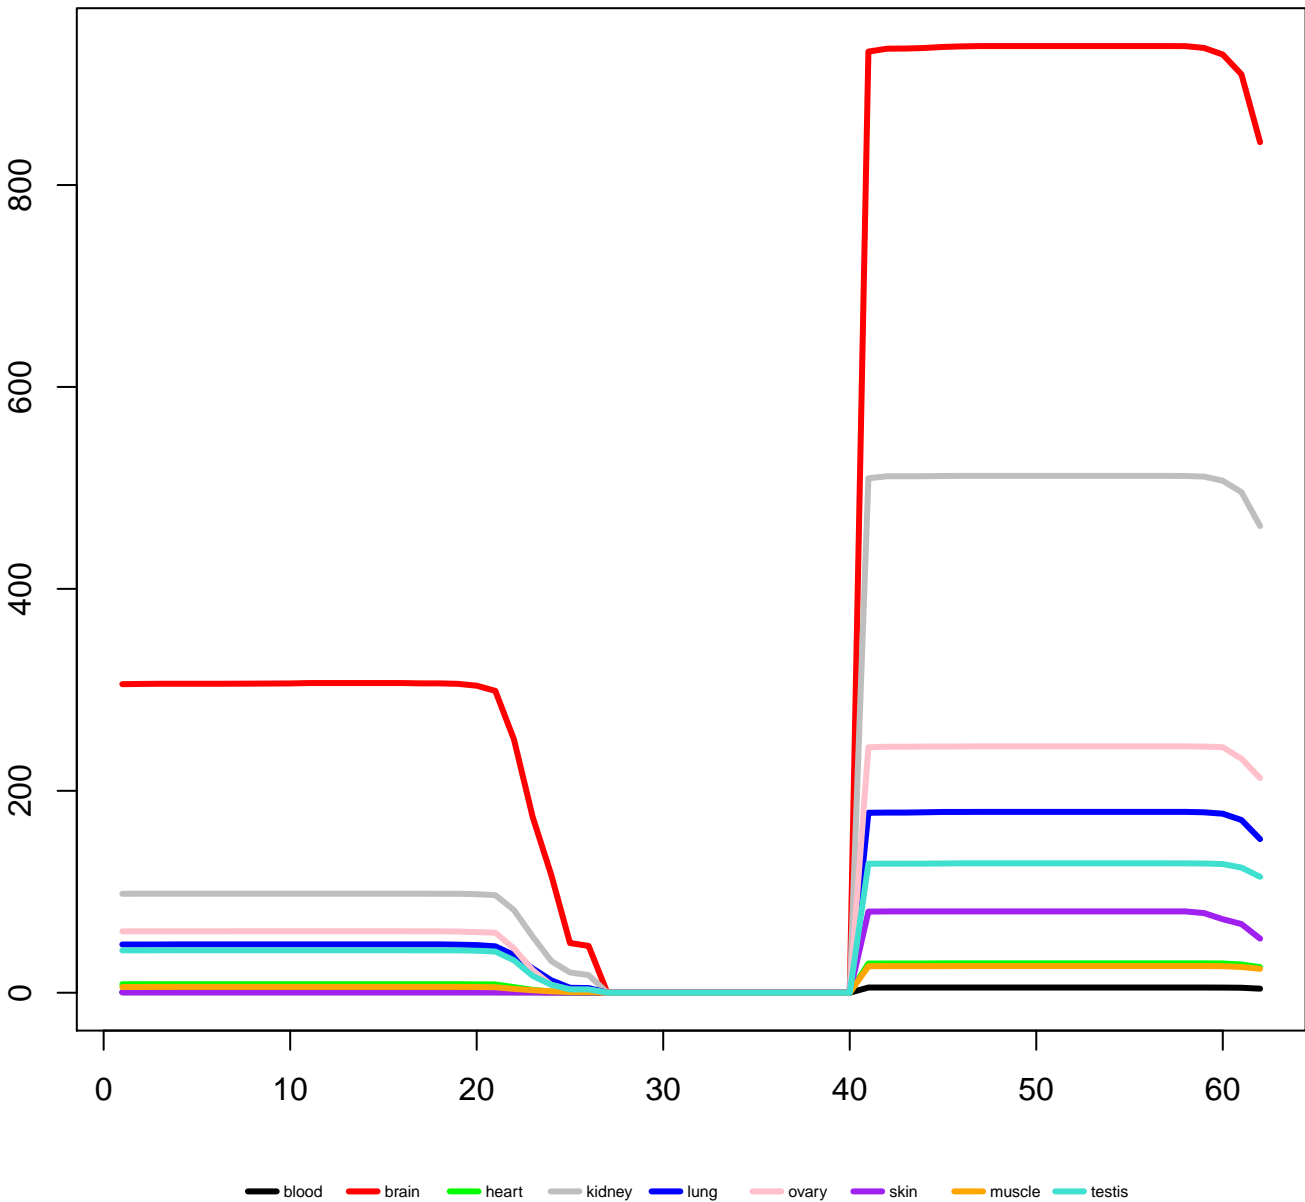



# X\_42774680-42774738(+)\_cfa-mir-532\_high

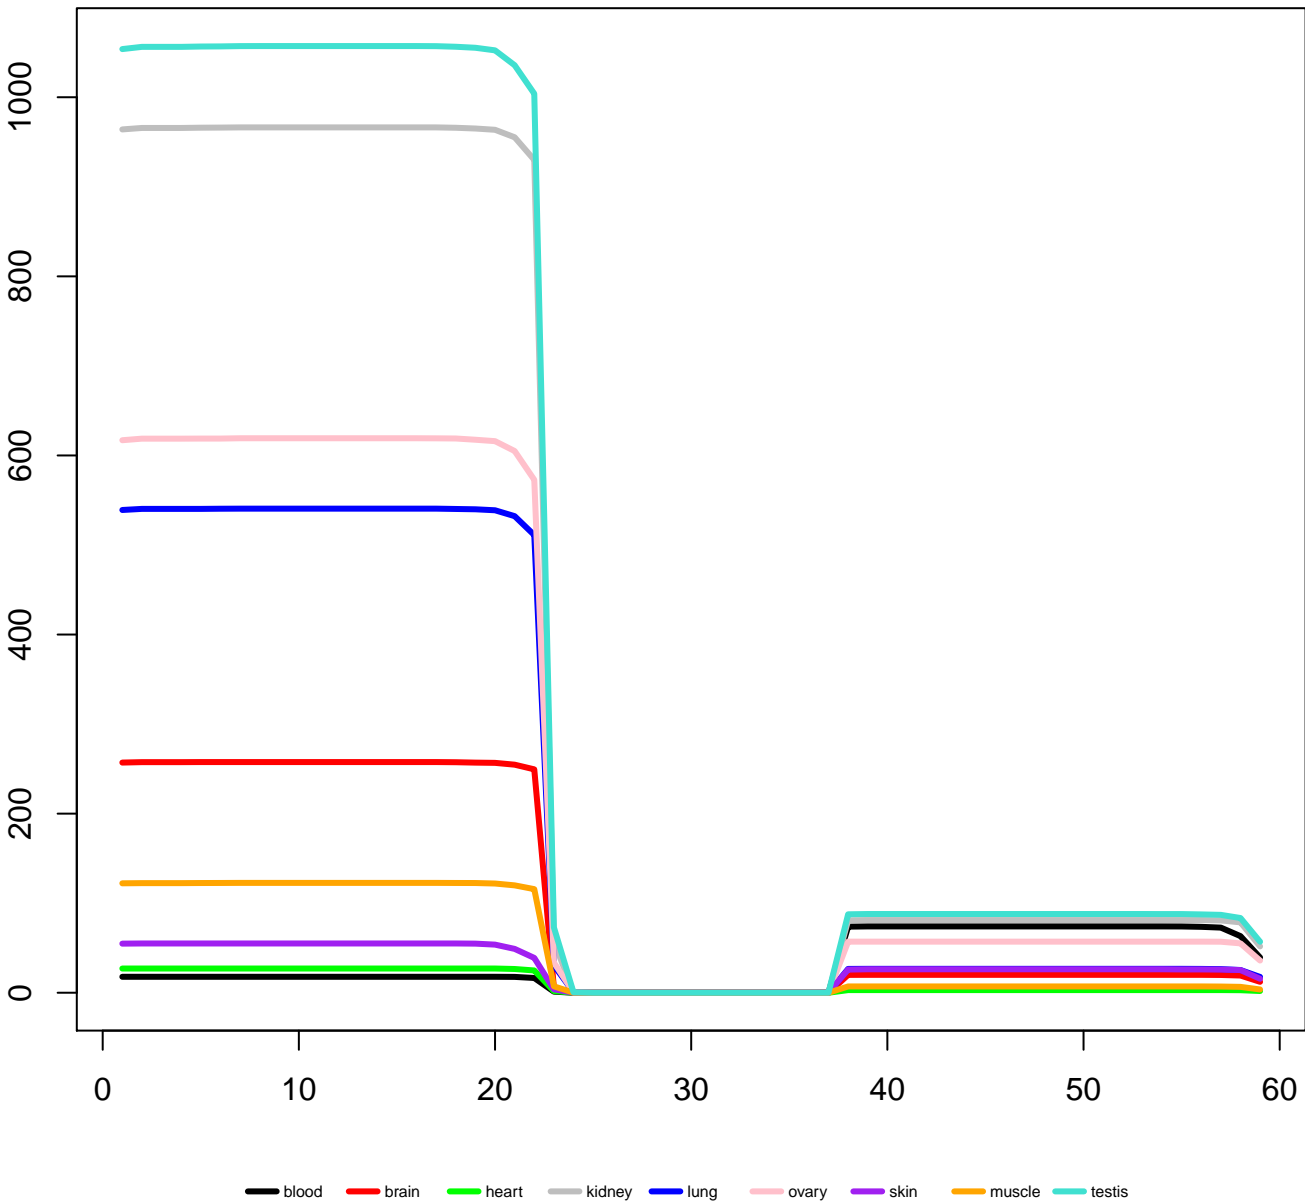

# X\_42775058-42775143(+)\_cfa-mir-188\_high

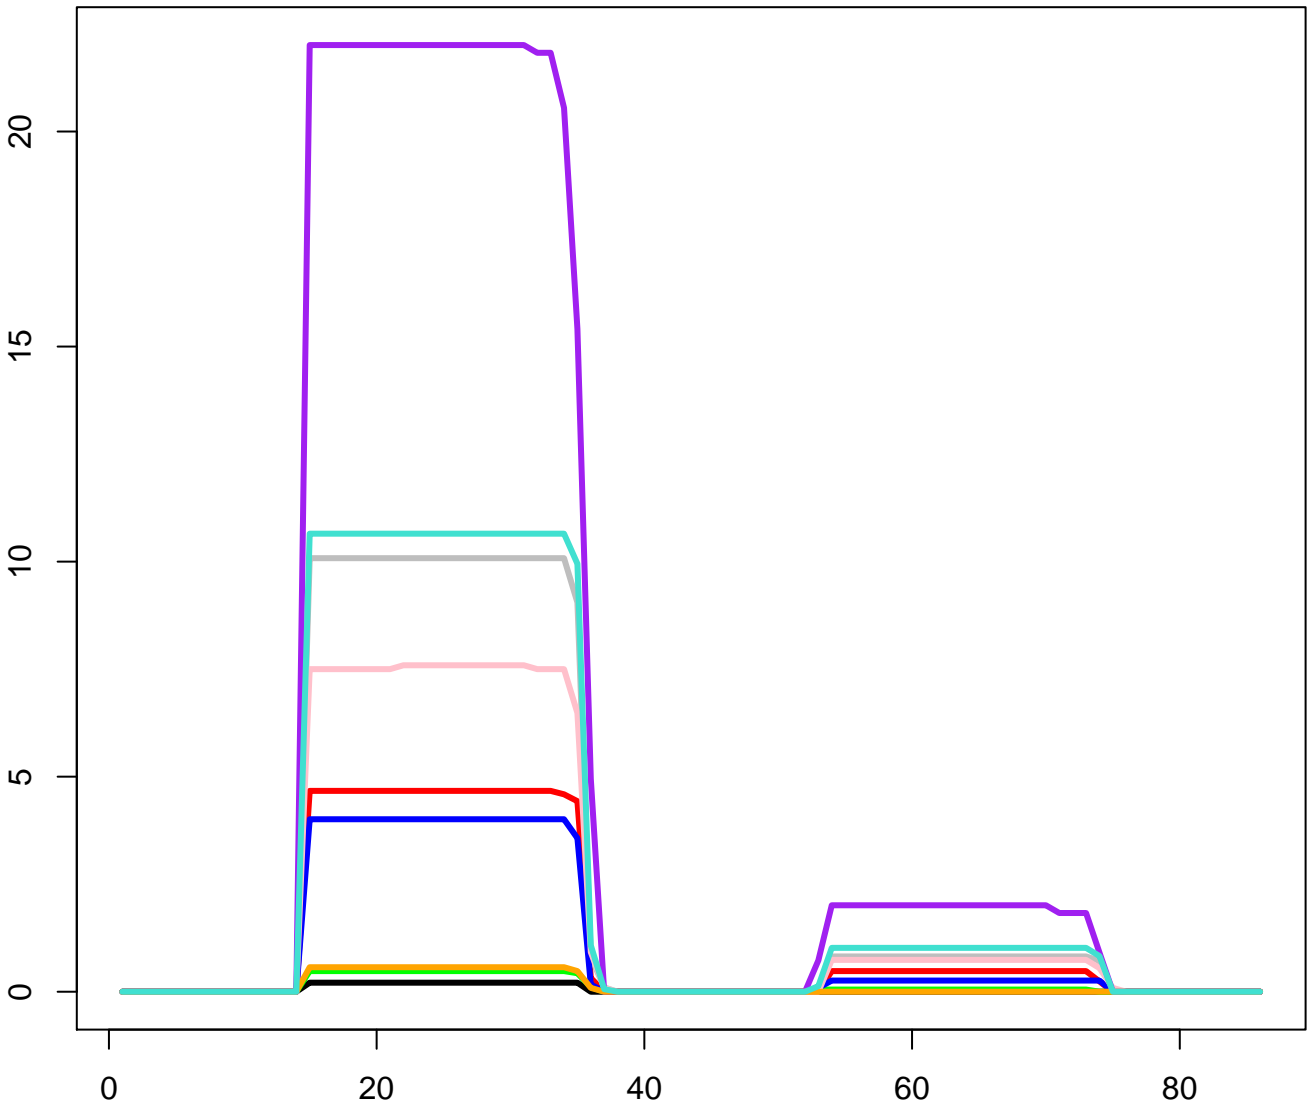

— blood — brain — heart — kidney — lung — ovary — skin — muscle — testis

# X\_42779872-42779930(+)\_cfa-mir-500\_high

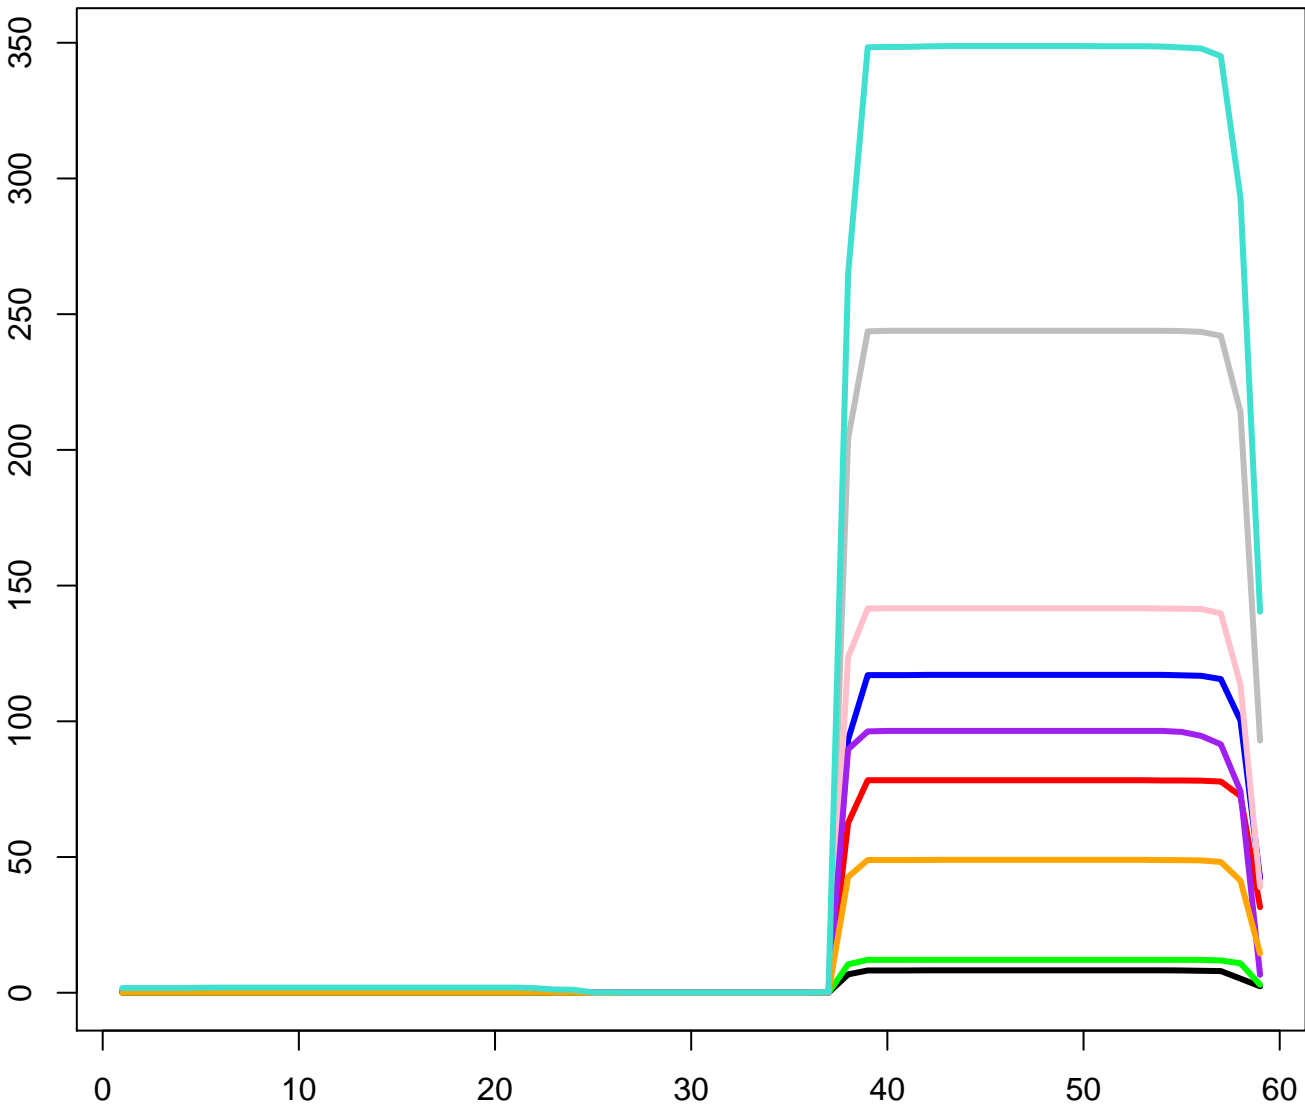

— blood — brain — heart — kidney — lung — ovary — skin — muscle — testis

# X\_42780368-42780435(+)\_cfa-mir-362\_high

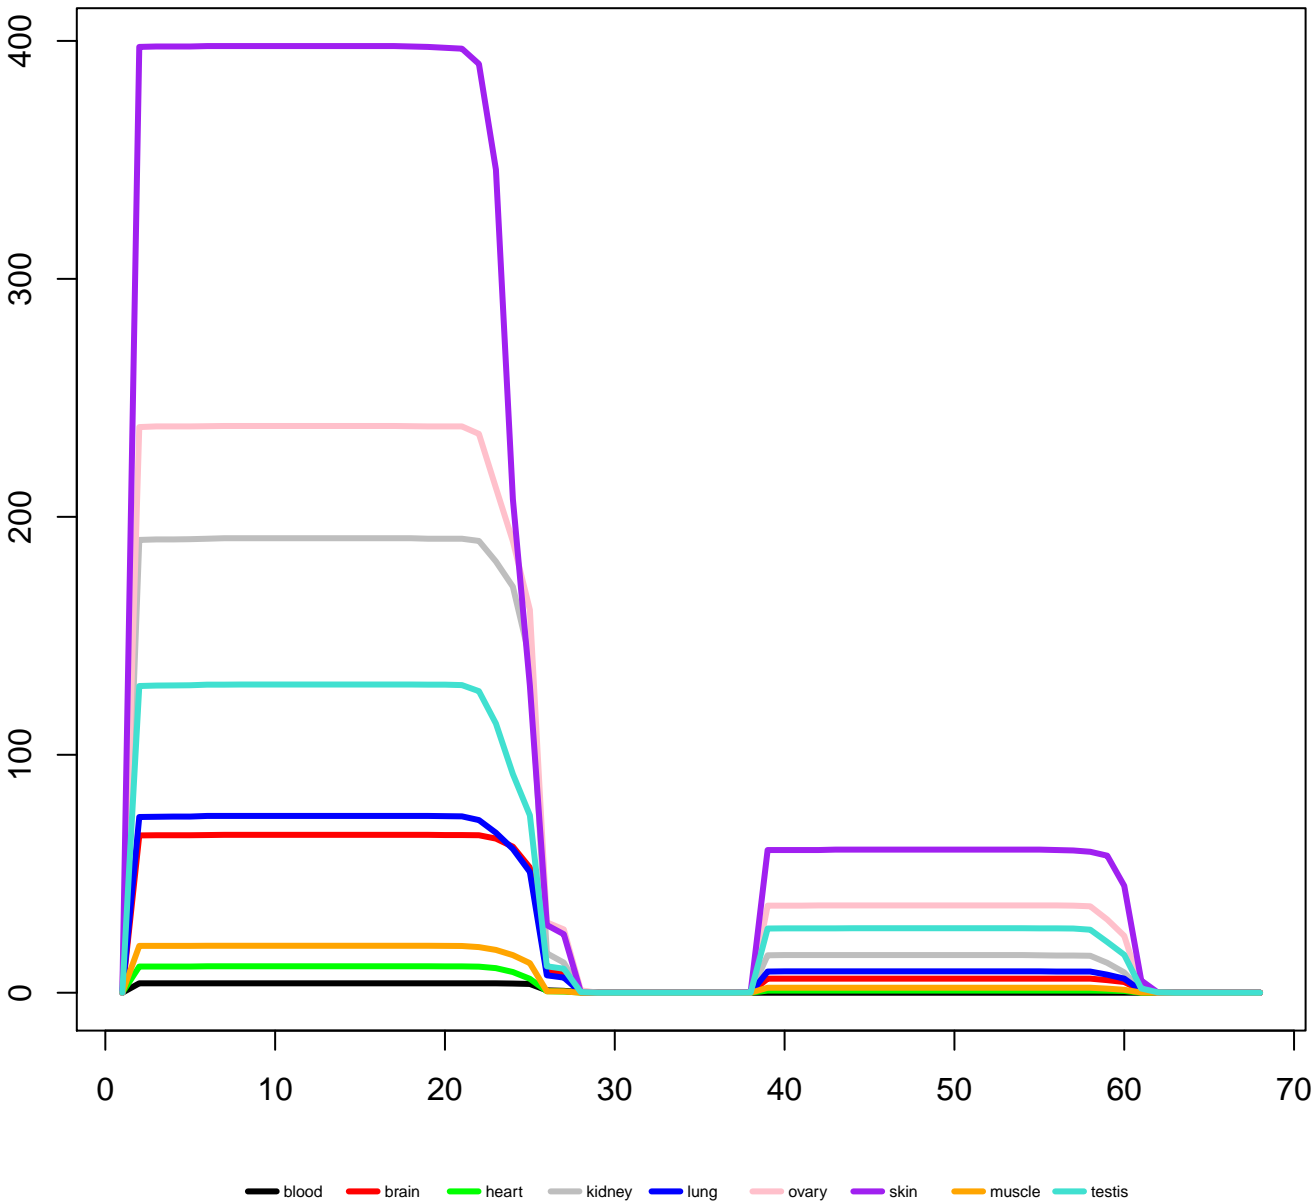







# X\_42785601-42785659(+)\_cfa-mir-502\_high

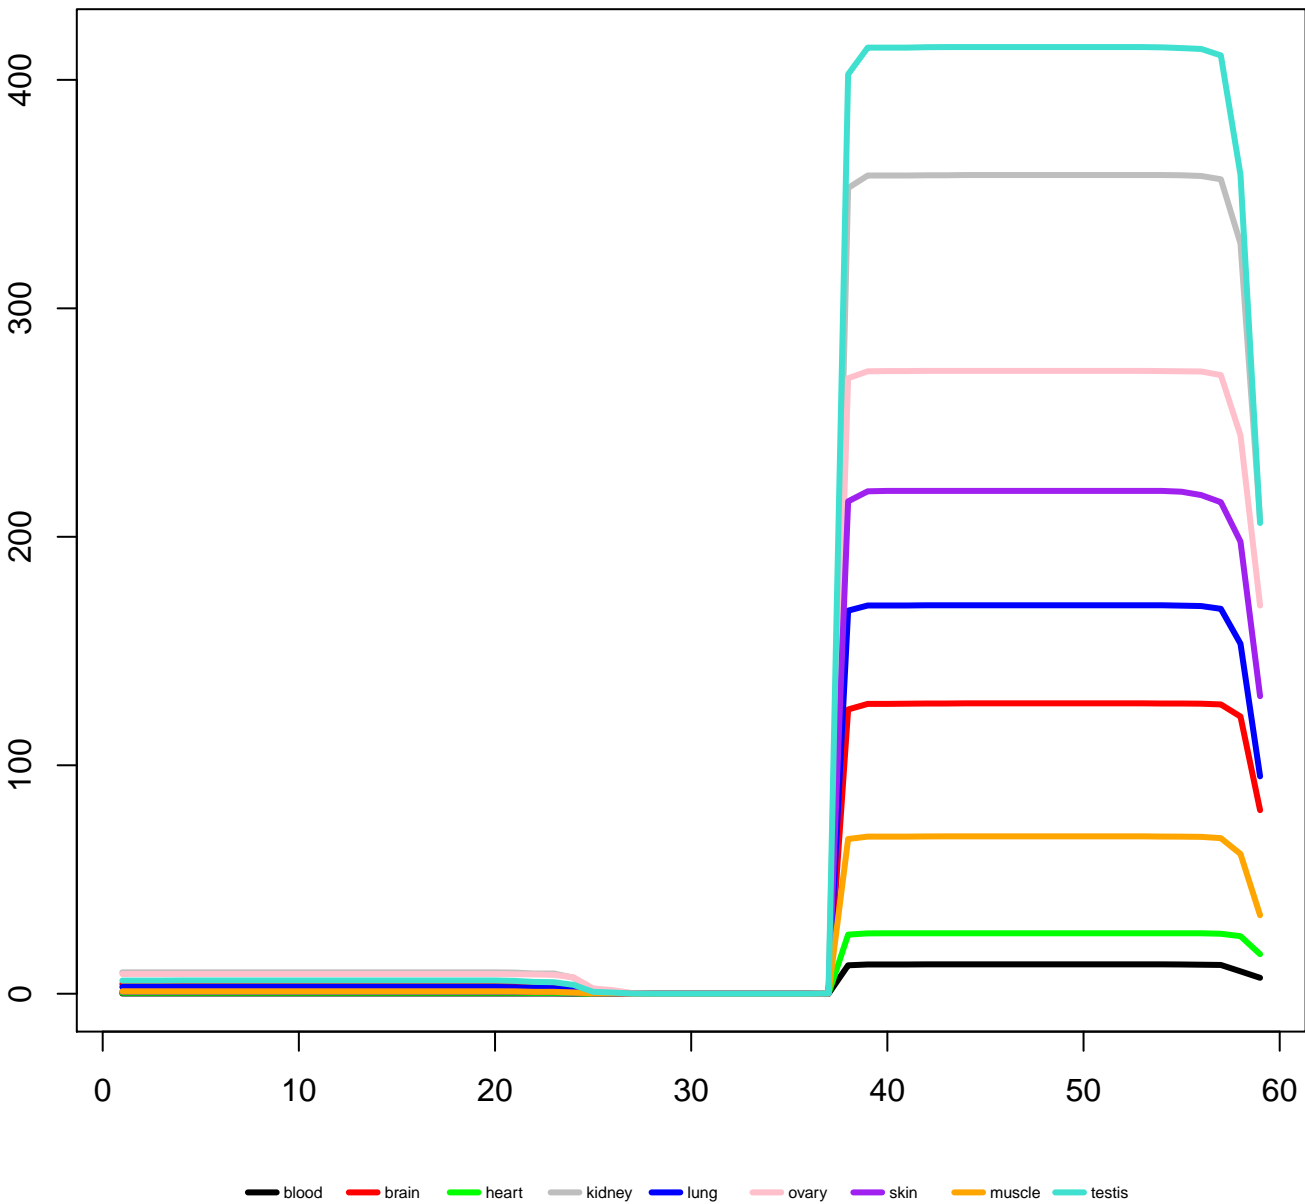

# X\_43758547-43758691(+)\_cfa-mir-8791b\_low



blood brain heart kidney lung ovary skin muscle testis

# X\_45253693-45253772(-)\_cfa-mir-98\_high

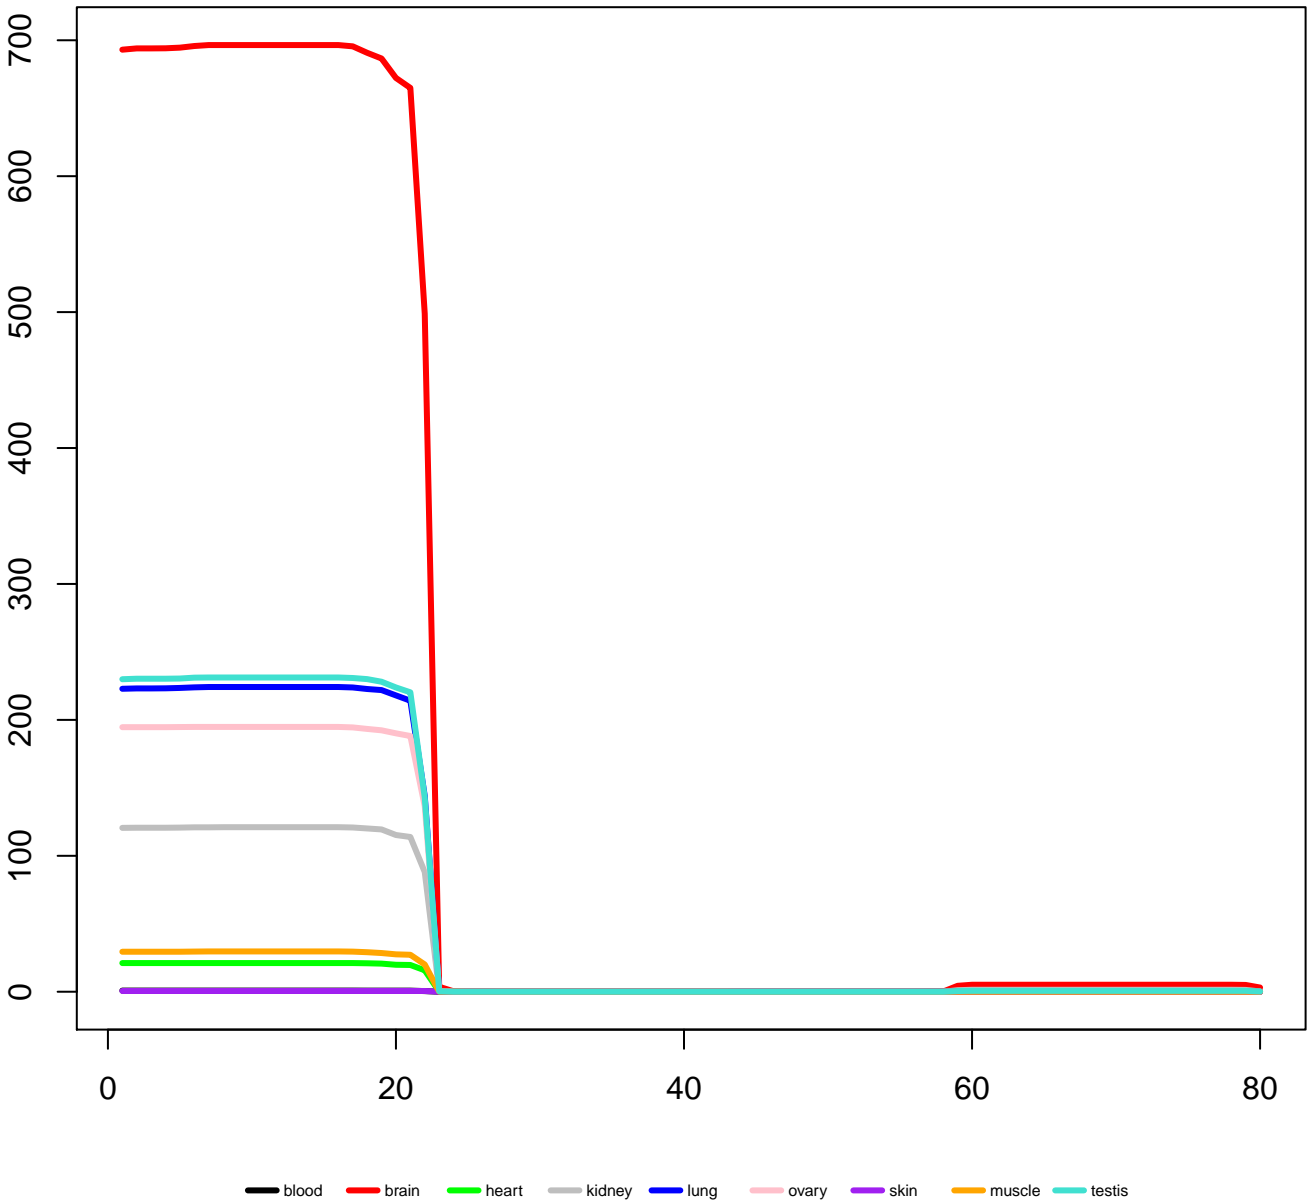

# X\_45254534-45254608(-)\_let-7f\_high

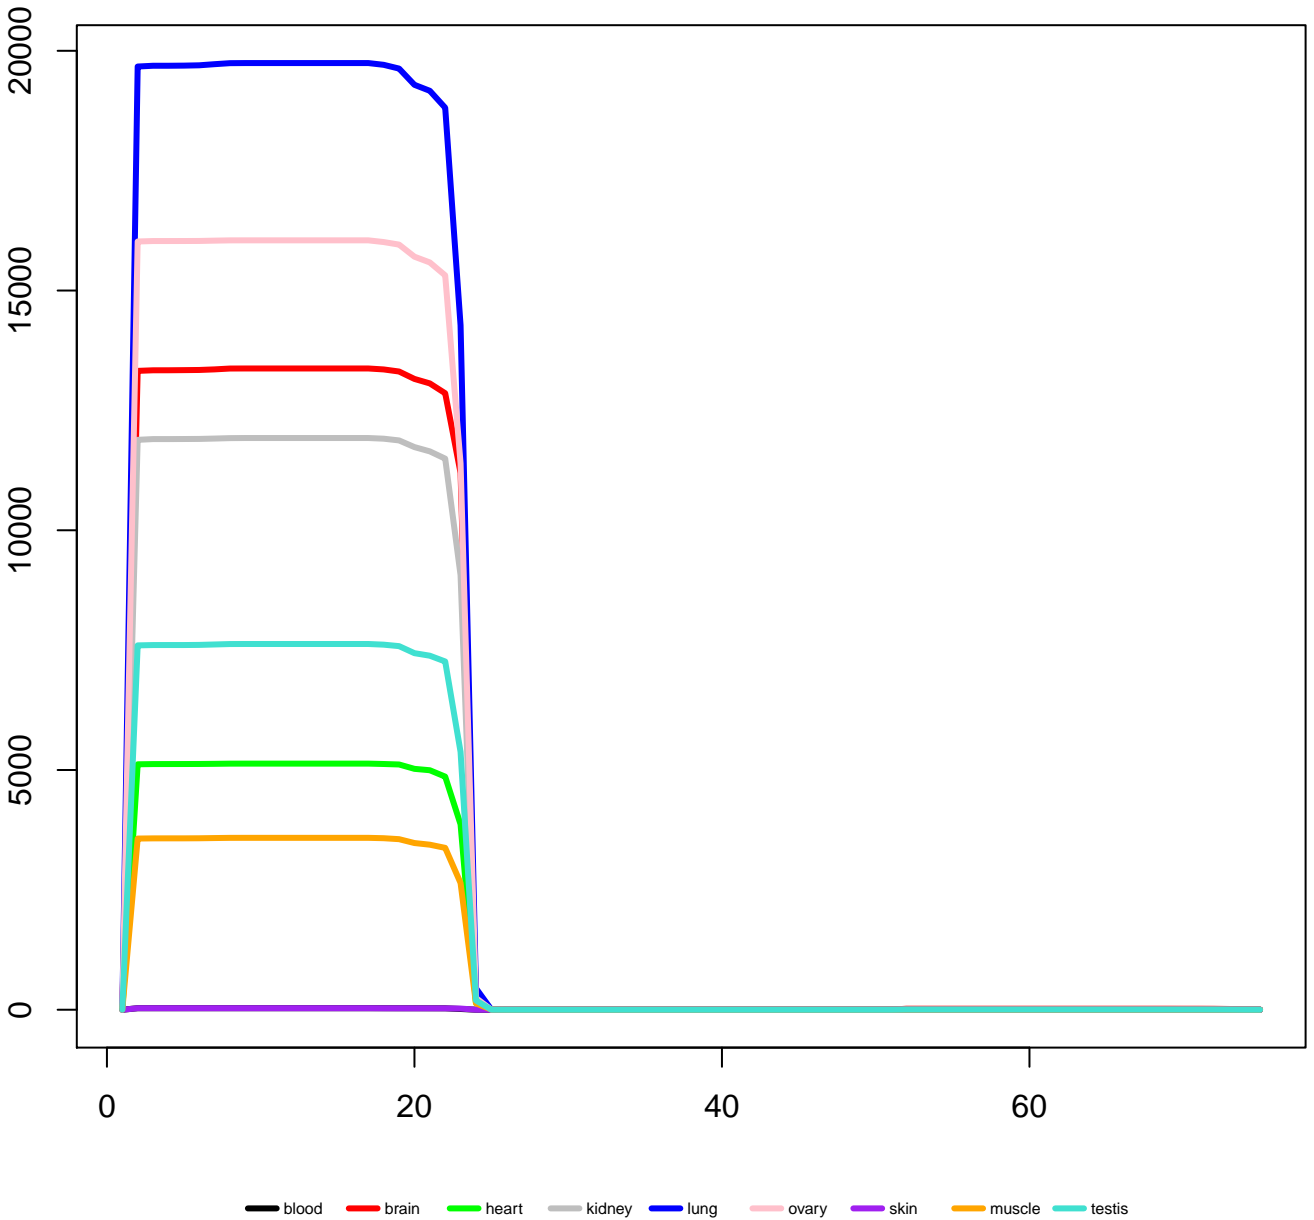

# X\_47487713-47487857(+)\_cfa-mir-8834b\_low



— blood — brain — heart — kidney — lung — ovary — skin — muscle — testis

# X\_48070440-48070580(-)\_cfa-mir-8834a-2\_low

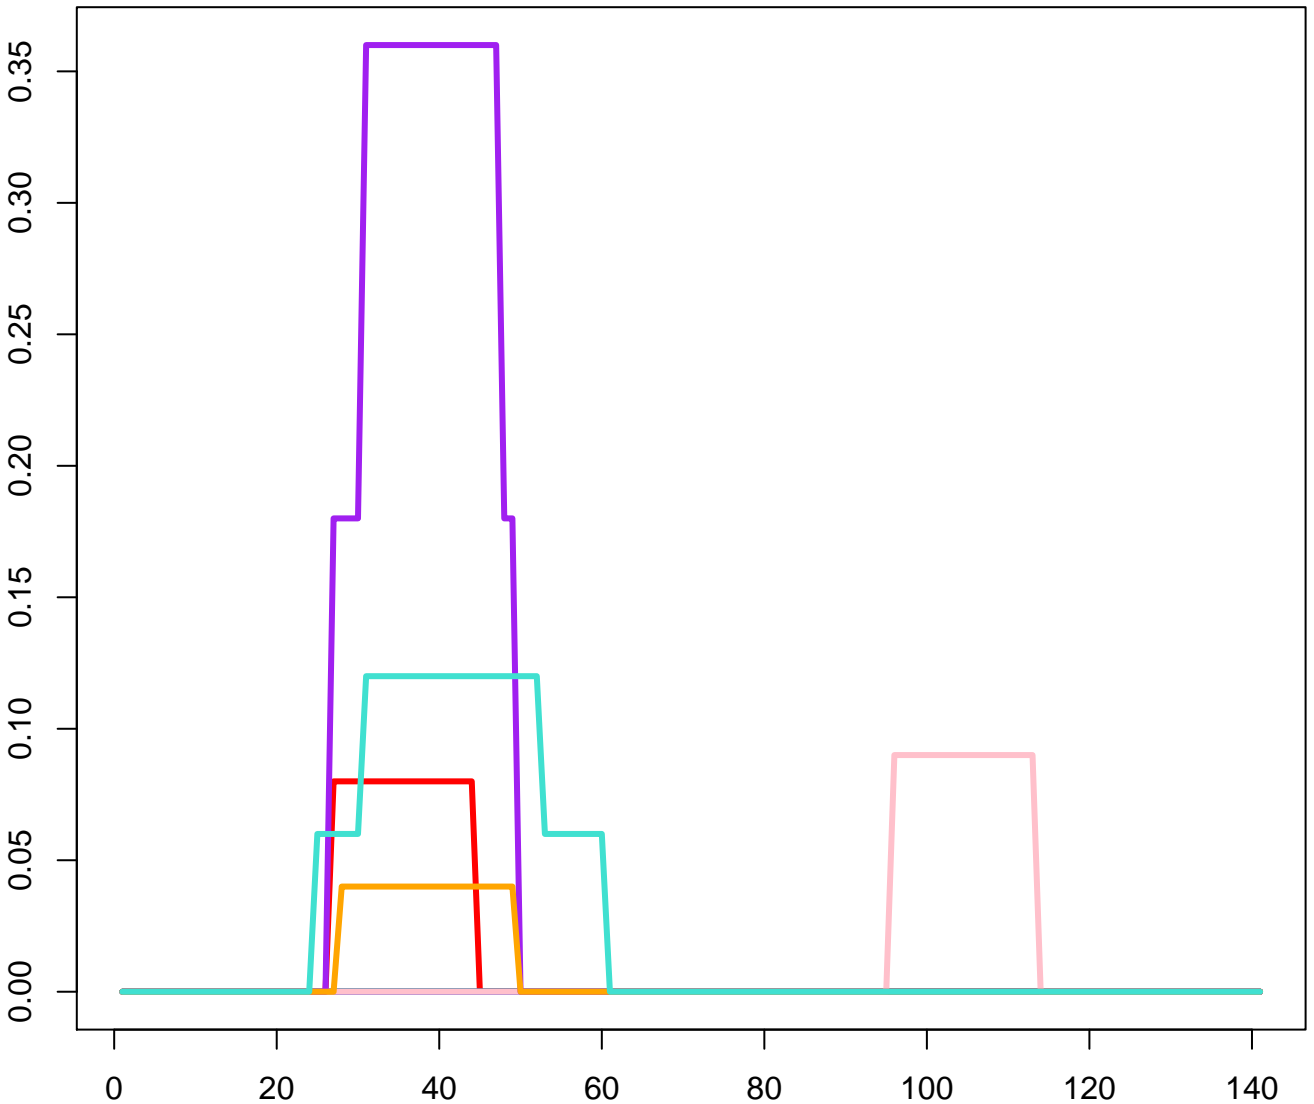

blood brain heart kidney lung ovary skin muscle testis



# X\_49313381-49313471(-)\_cfa-mir-1468\_high

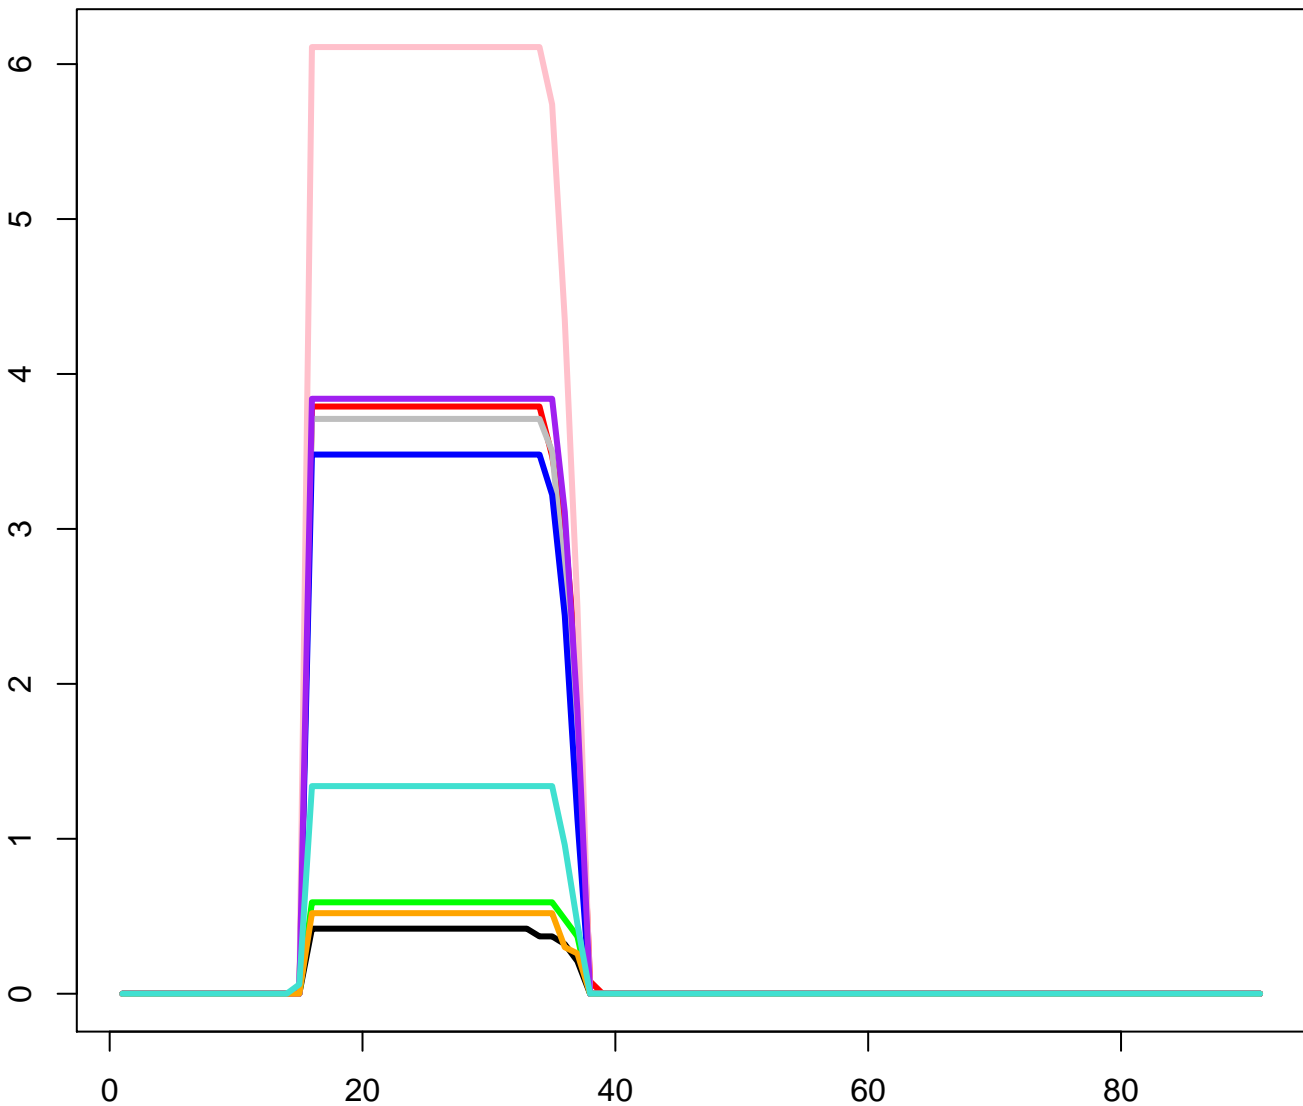

— blood — brain — heart — kidney — lung — ovary — skin — muscle — testis

# X\_50838131-50838233(+)\_cfa-mir-223\_high

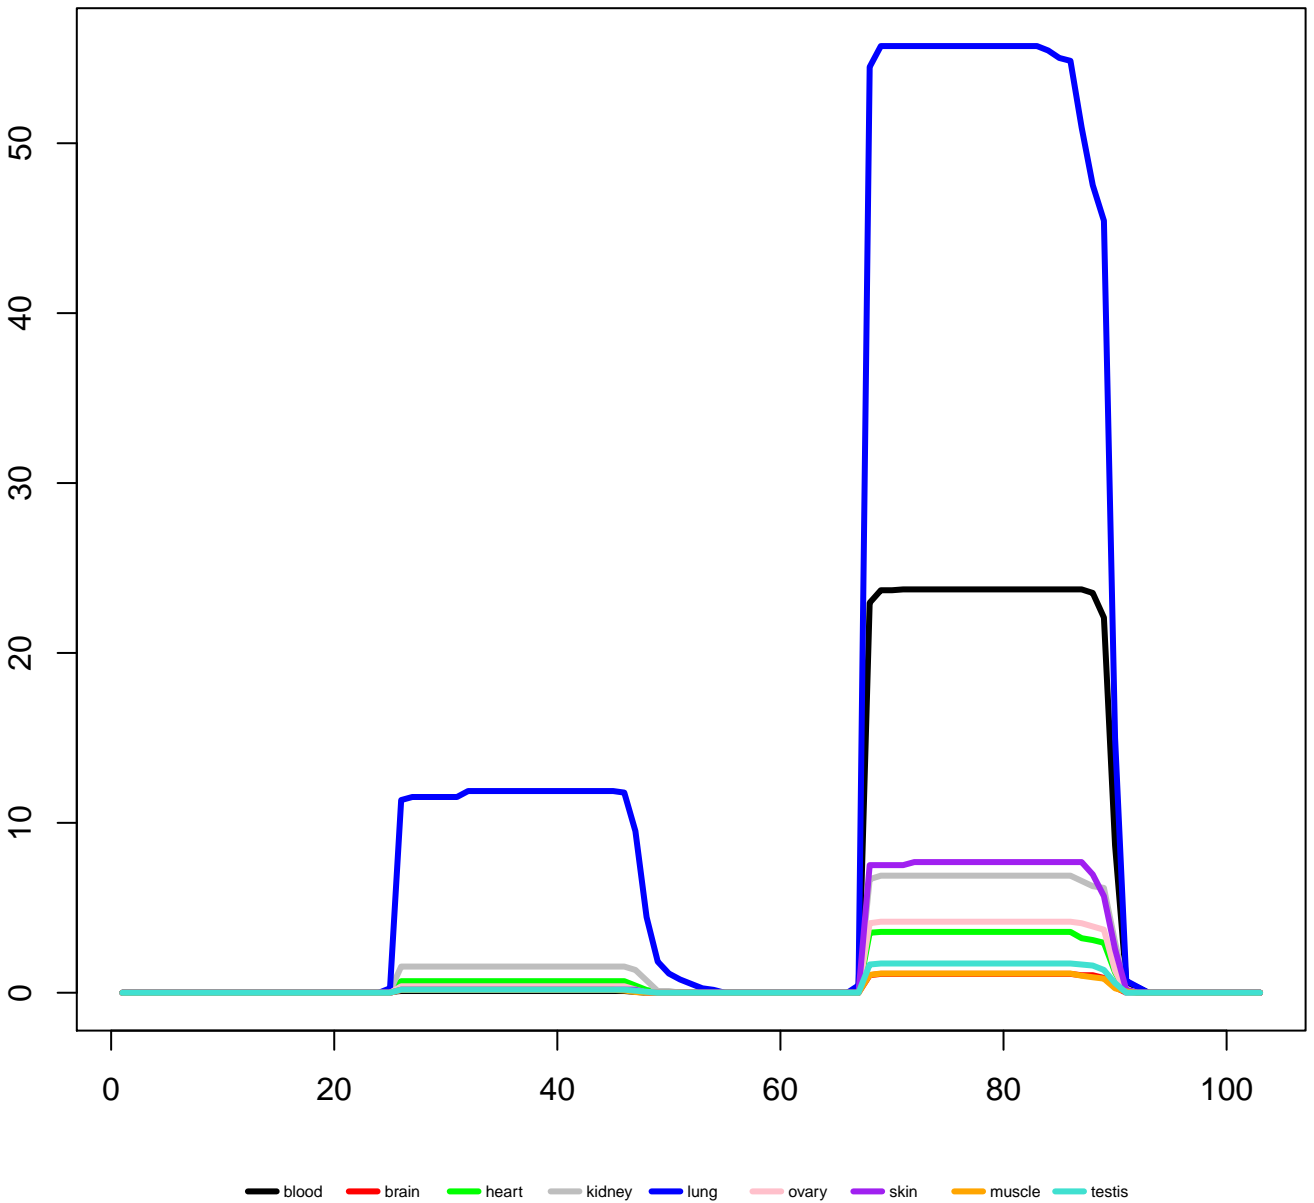

# X\_54495387-54495443(+)\_cfa-mir-676\_high

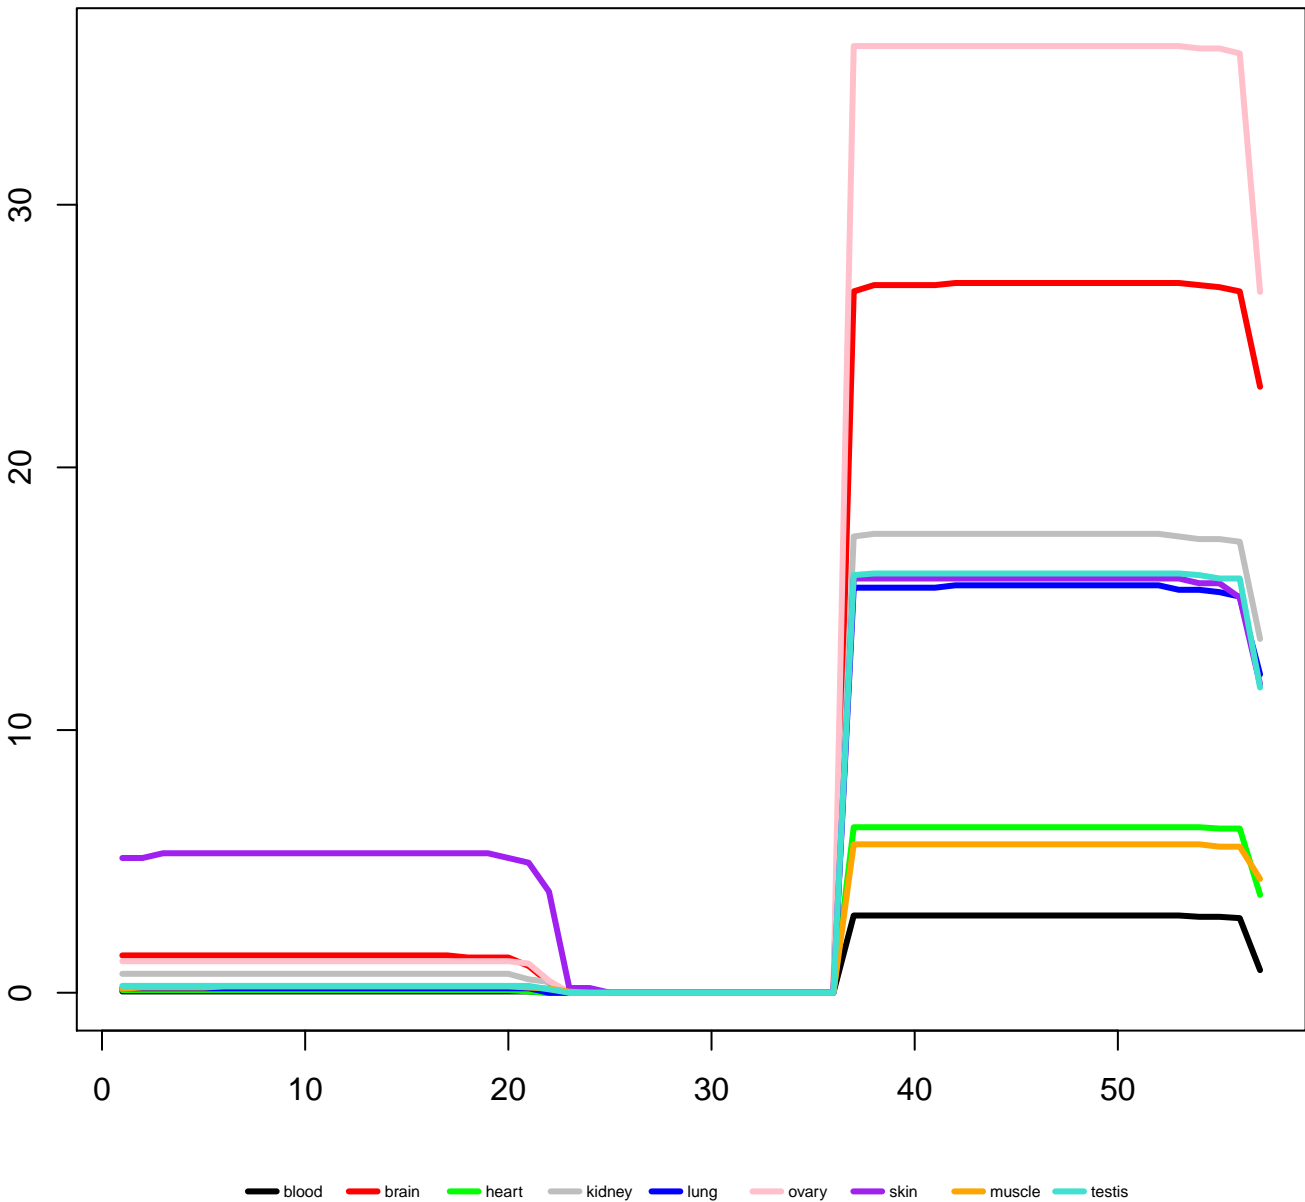

# X\_57550055-57550110(-)\_cfa-mir-421\_high

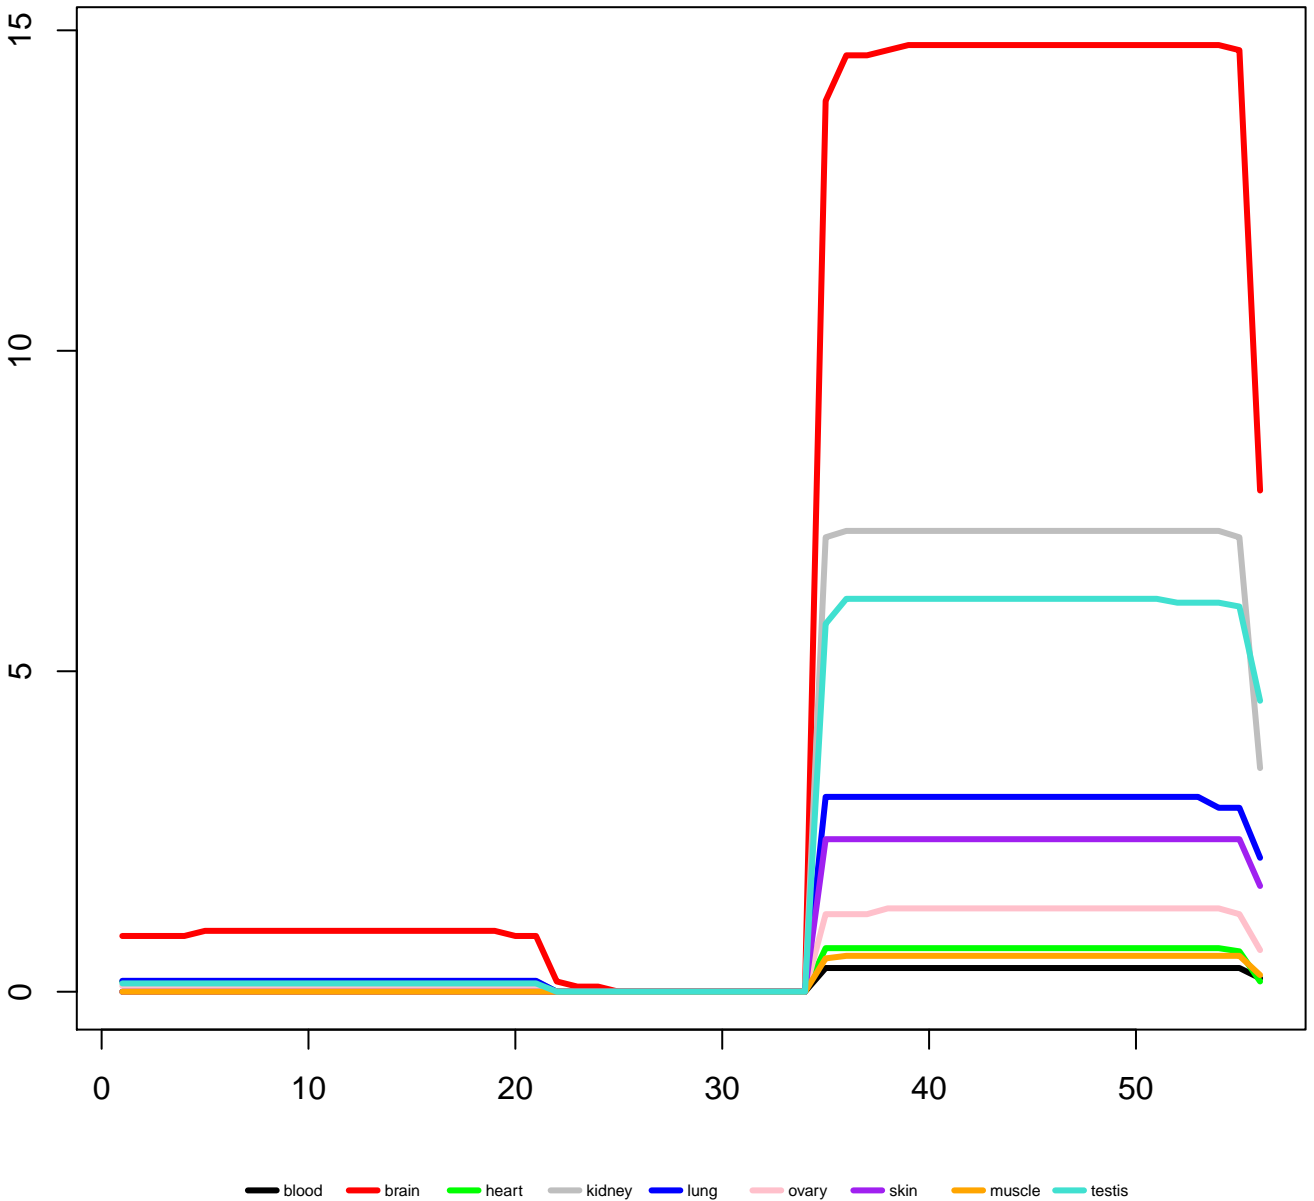

# X\_57550217-57550268(-)\_cfa-mir-374b\_high

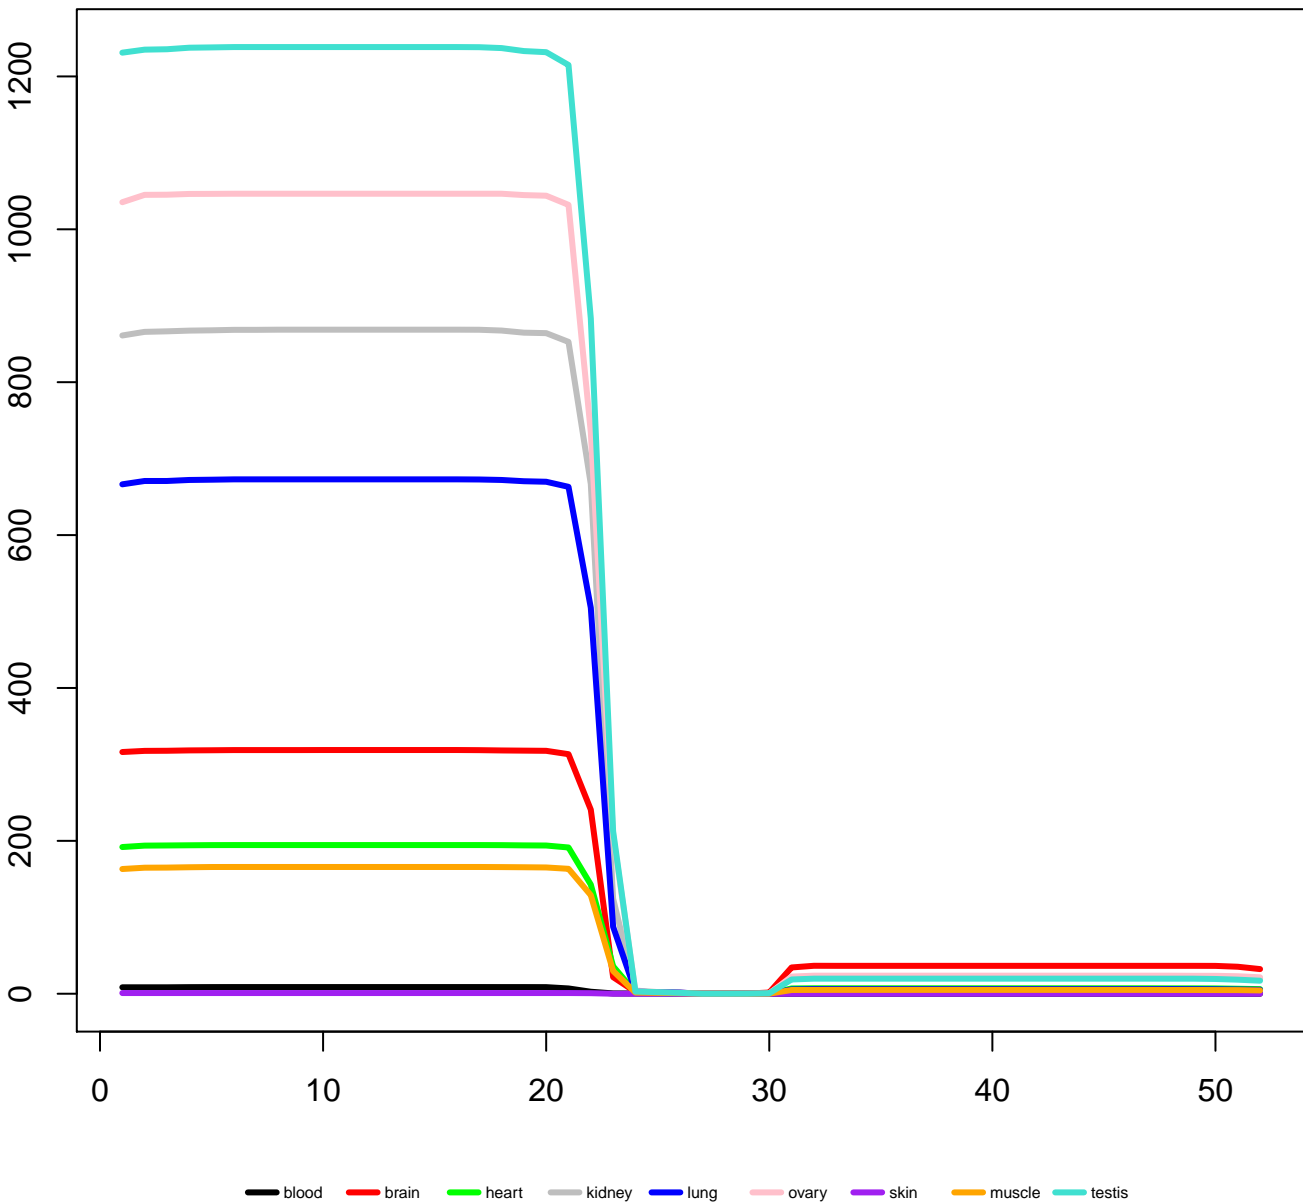

# X\_57590201-57590306(-)\_cfa-mir-545\_high

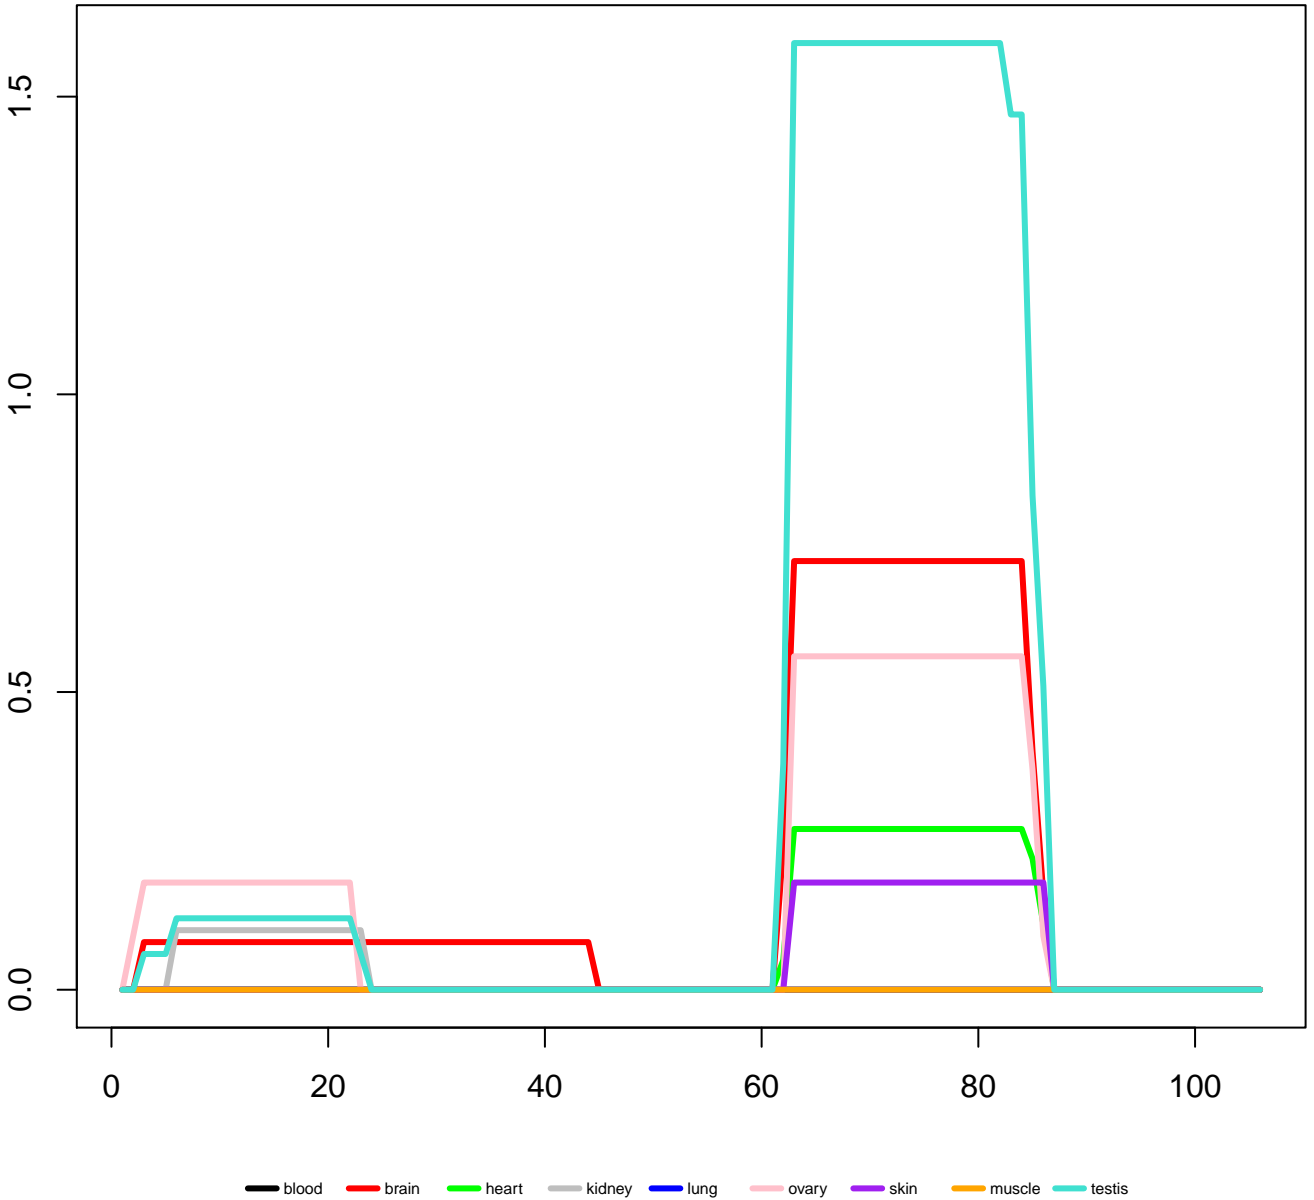

# X\_57590394-57590445(-)\_cfa-mir-374a\_high

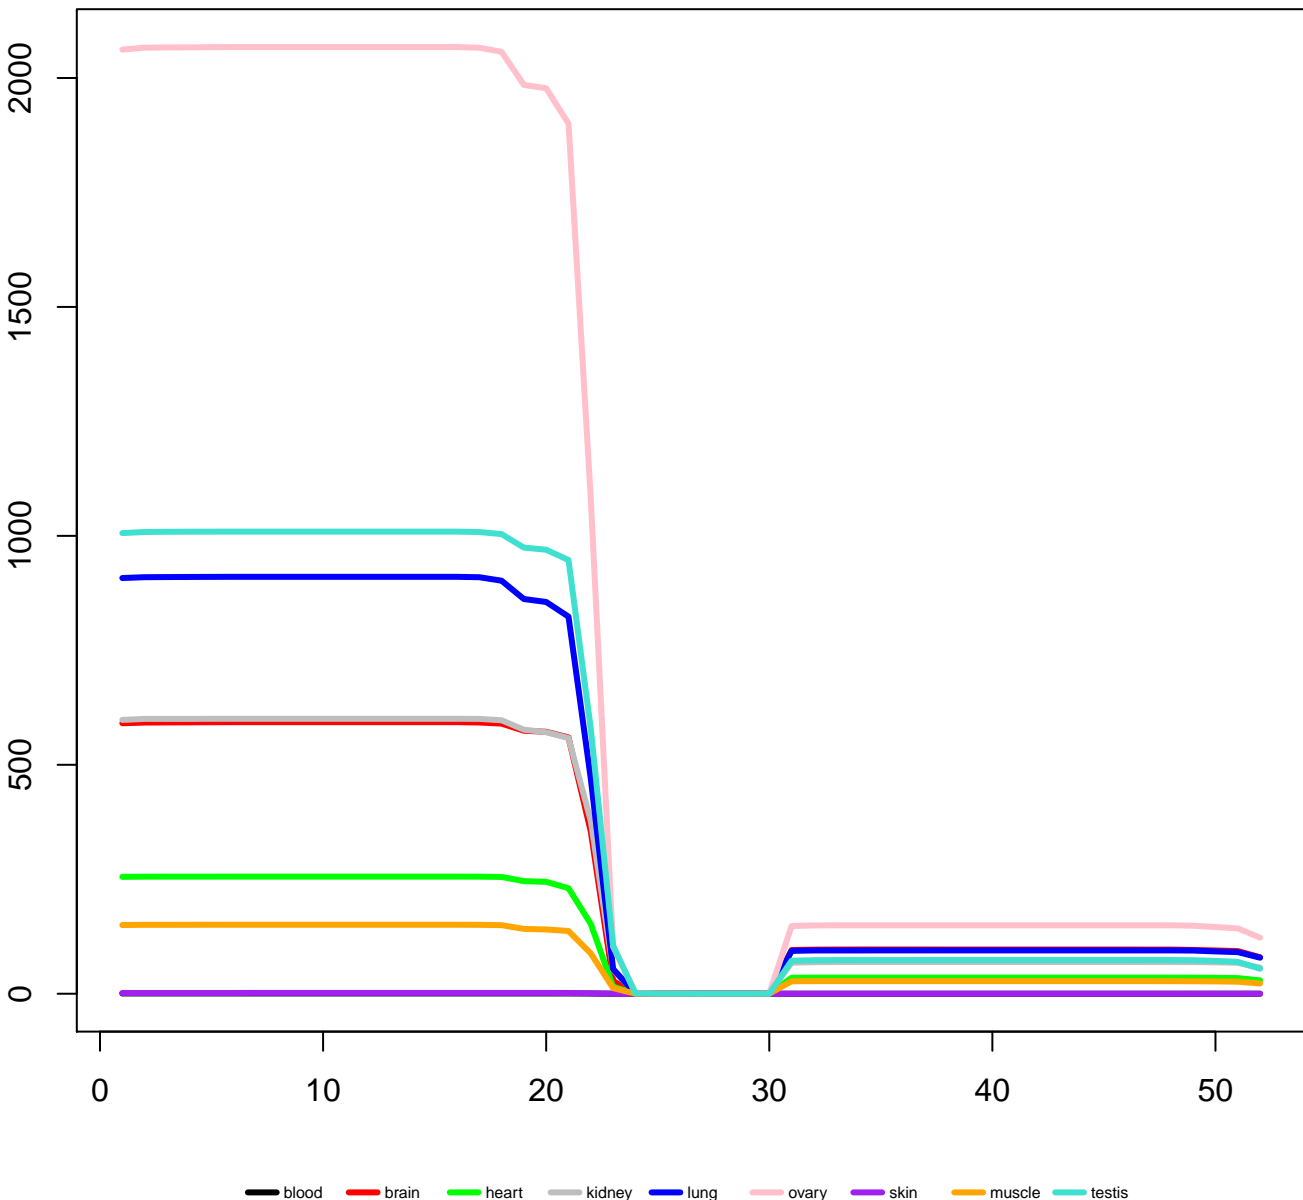

# X\_58042211-58042292(-)\_mir-672\_low

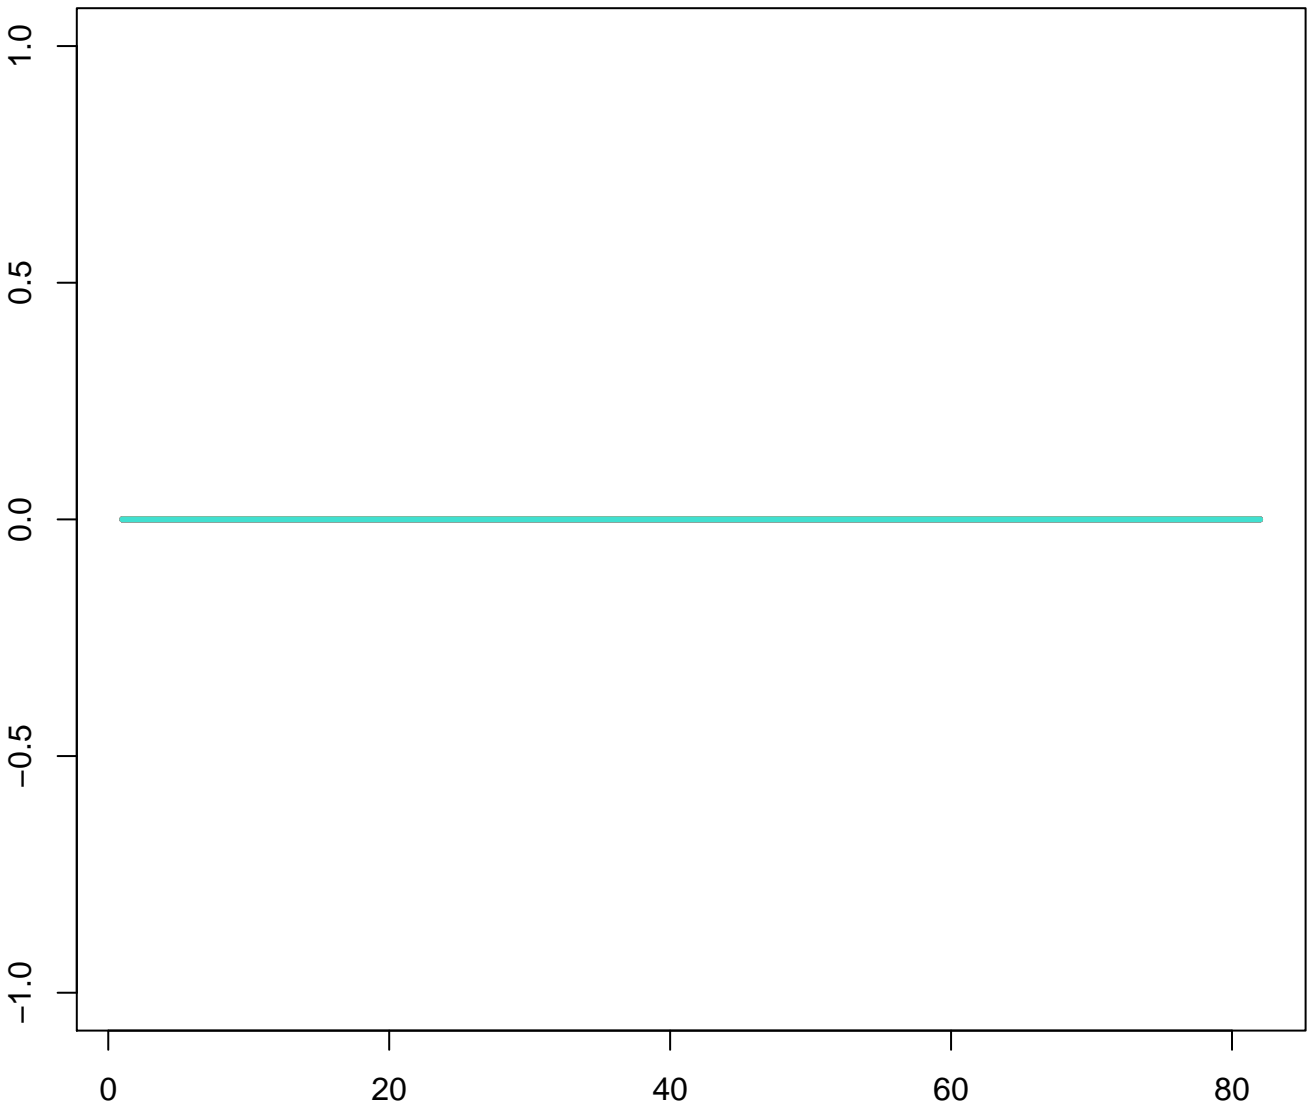

blood brain heart kidney lung ovary skin muscle testis





# X\_59443927-59444020(-)\_cfa-mir-325\_high

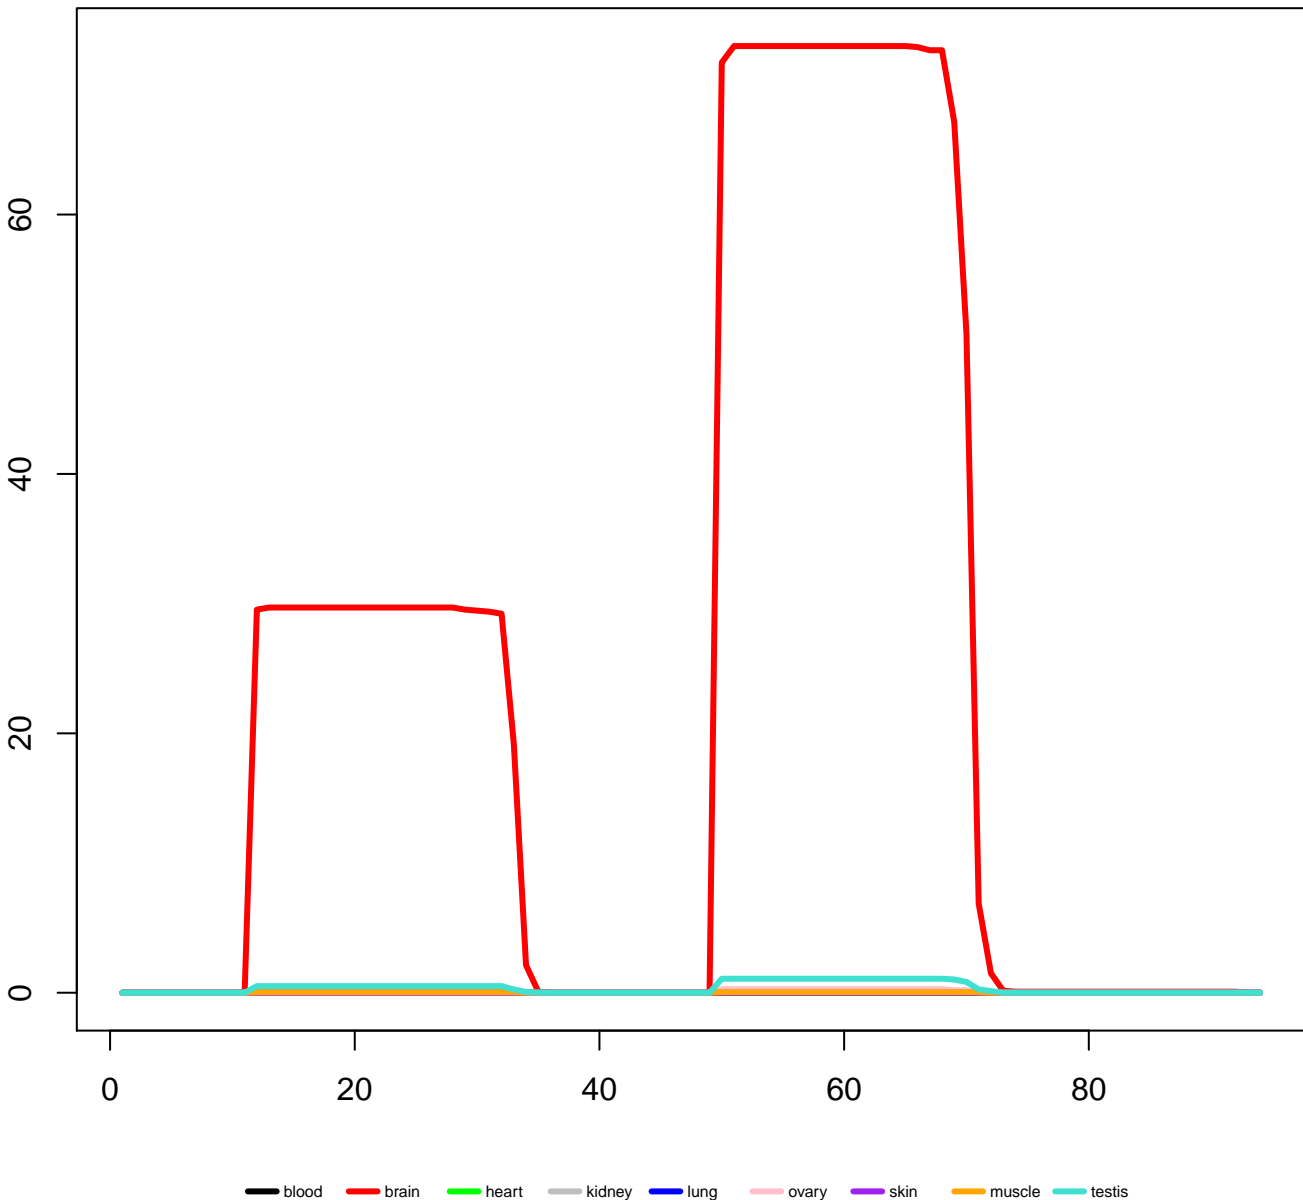

# X\_66698698-66698760(-)\_cfa-mir-361\_high

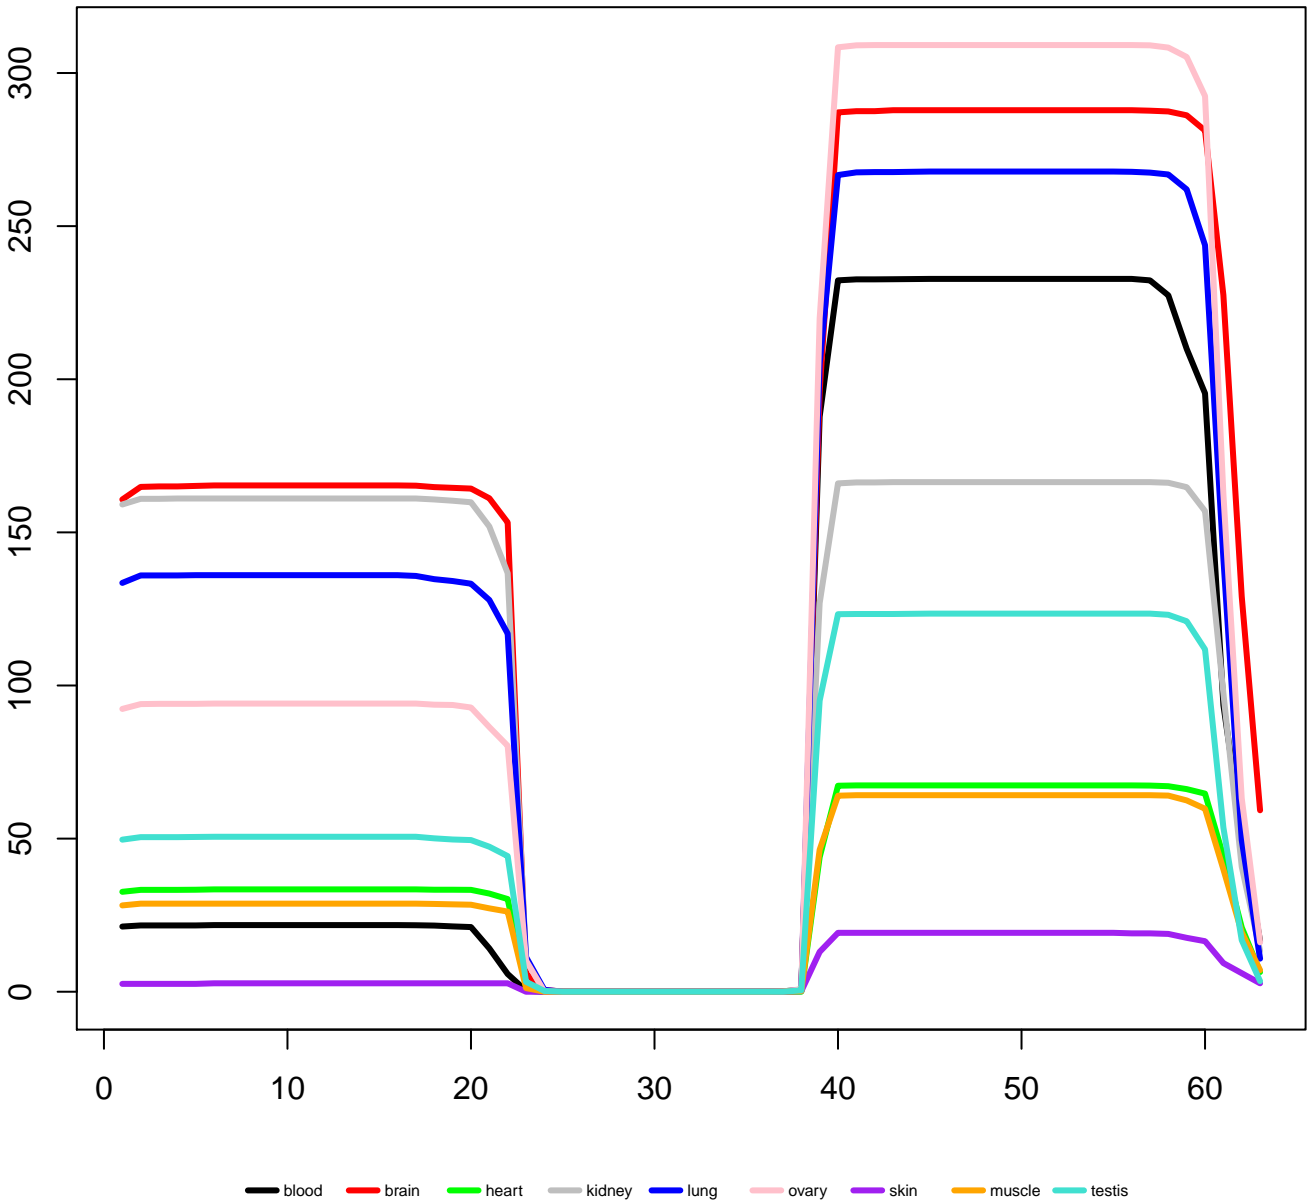

# X\_71568579-71568646(+)\_cfa-let-7j\_low

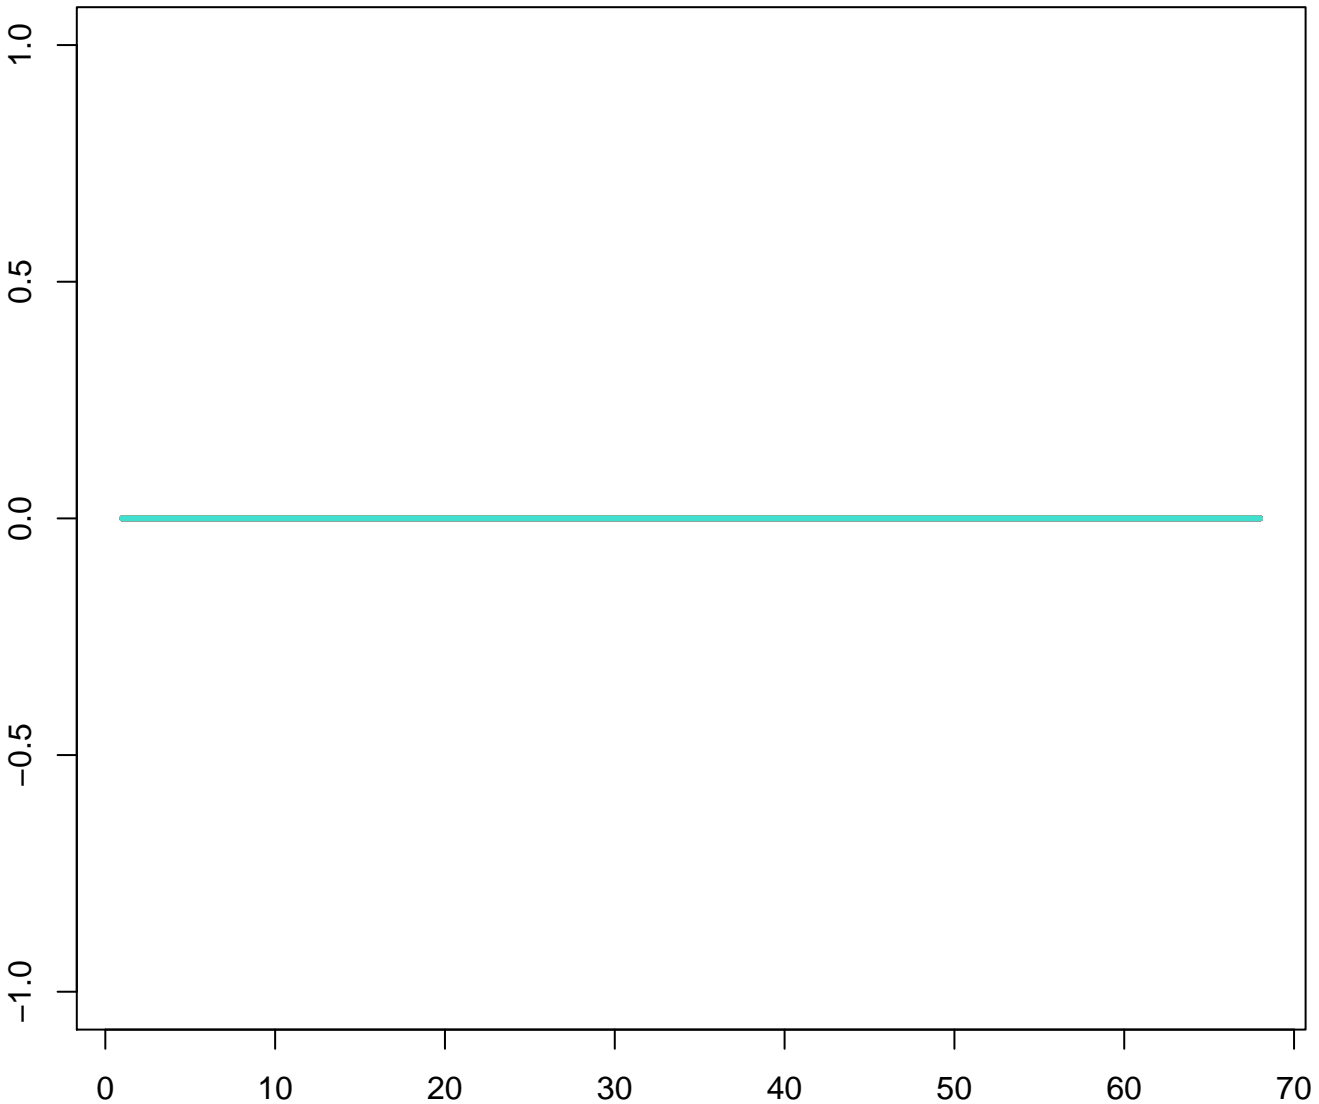

blood brain heart kidney lung ovary skin muscle testis

# X\_76666587-76666685(+)\_cfa-mir-8904a\_low

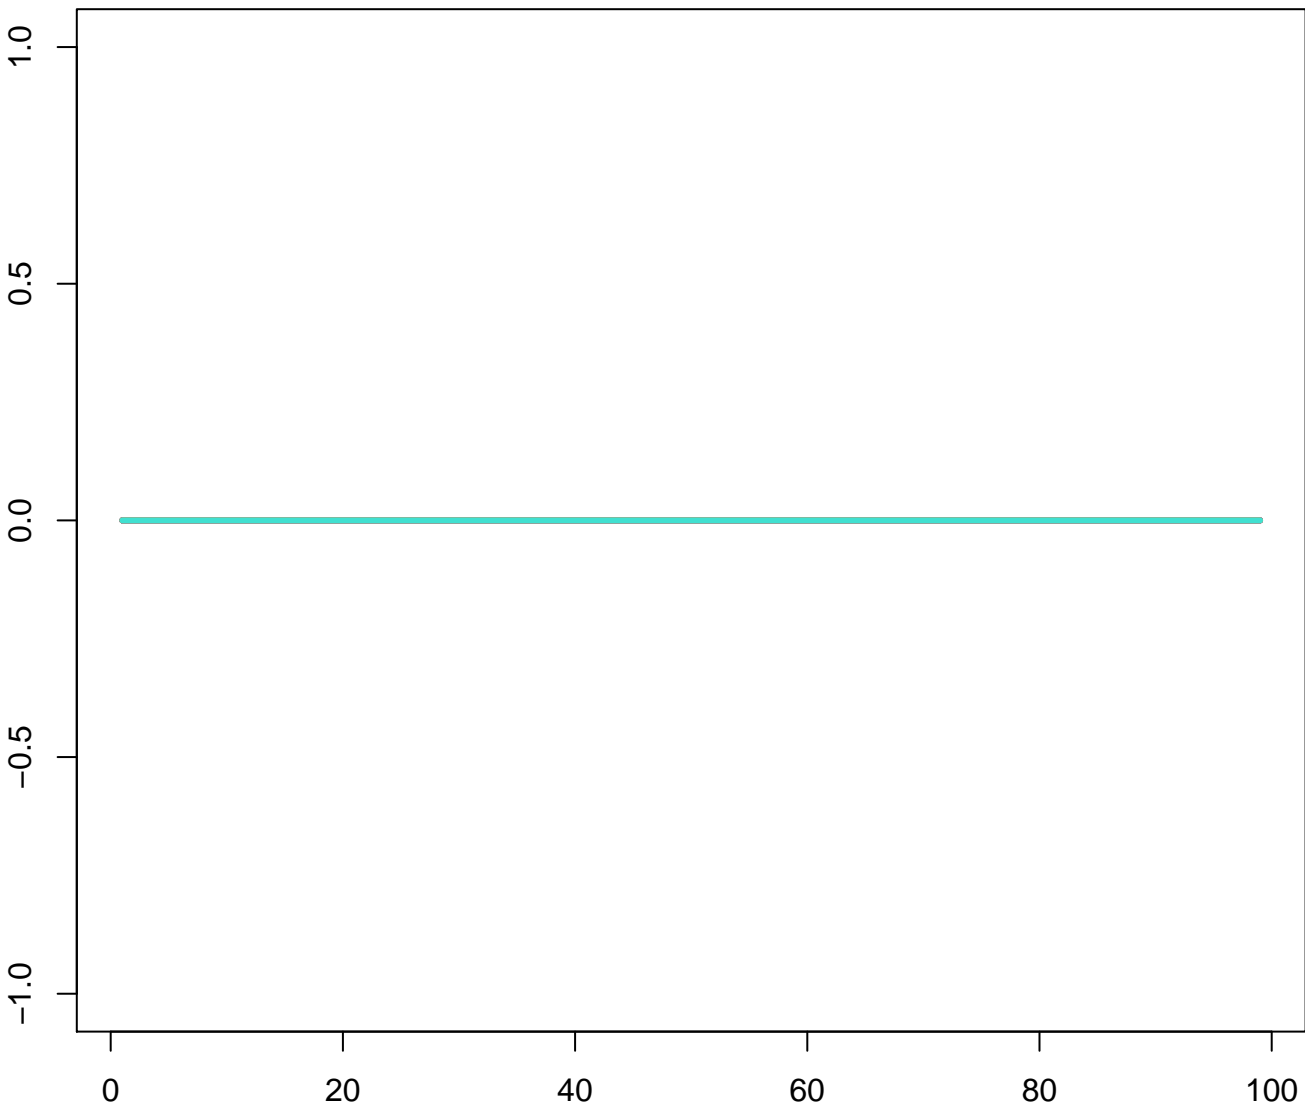

blood brain heart kidney lung ovary skin muscle testis

# X\_83271857-83271919(+)\_cfa-mir-652\_high

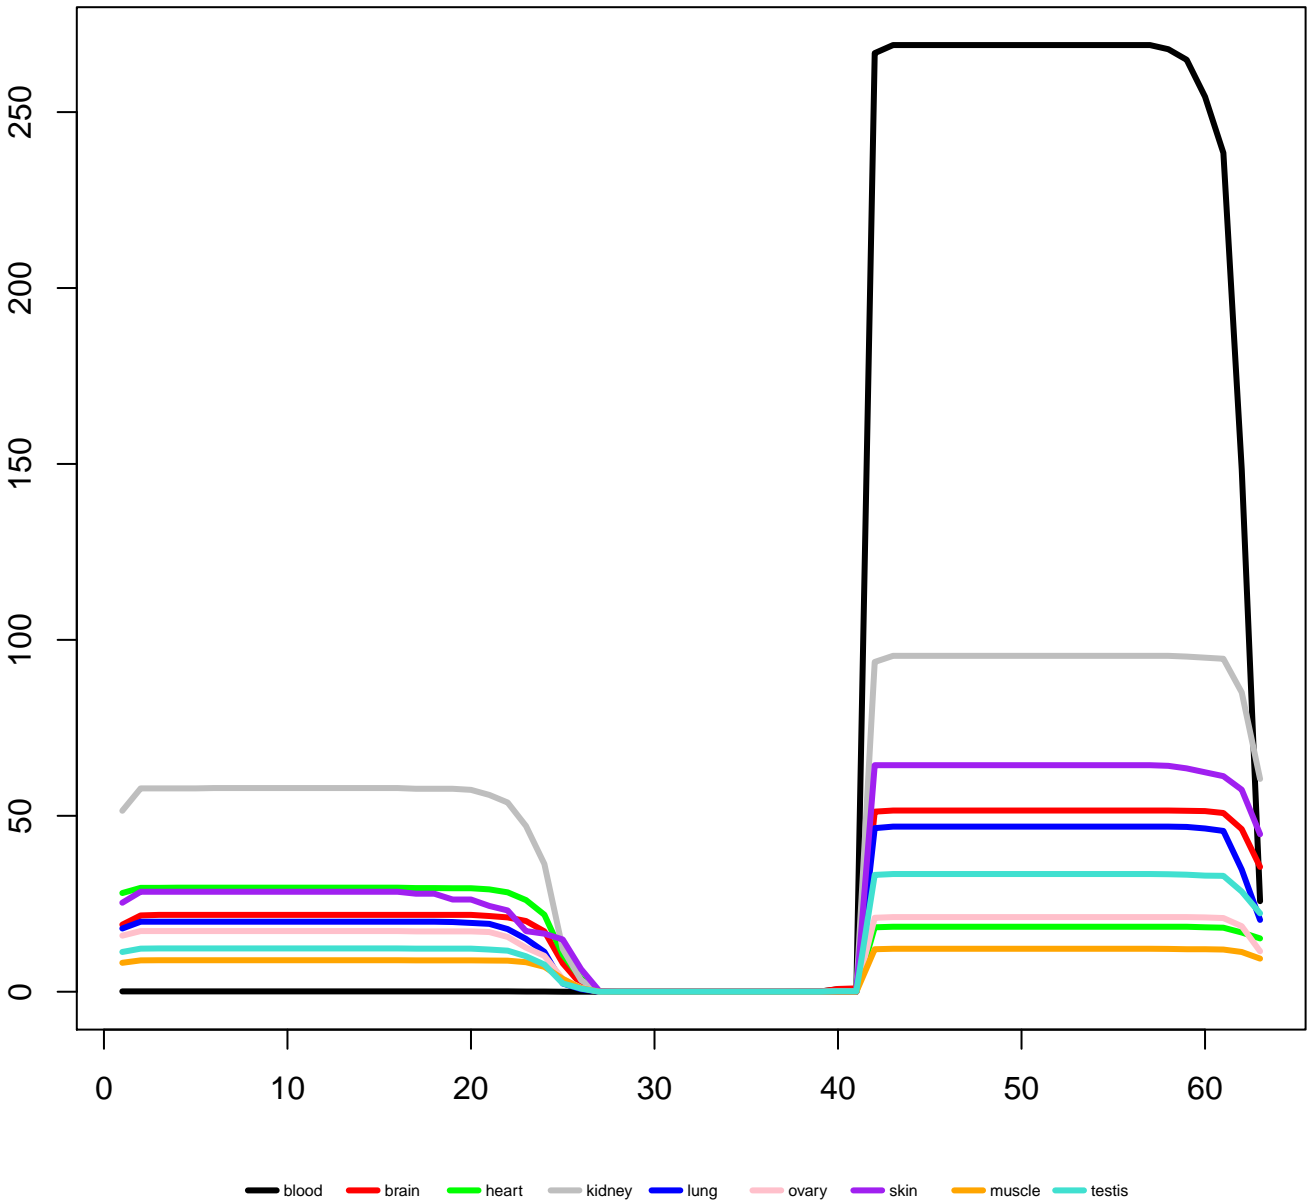

# X\_87387040-87387144(+)\_mir-3552\_high

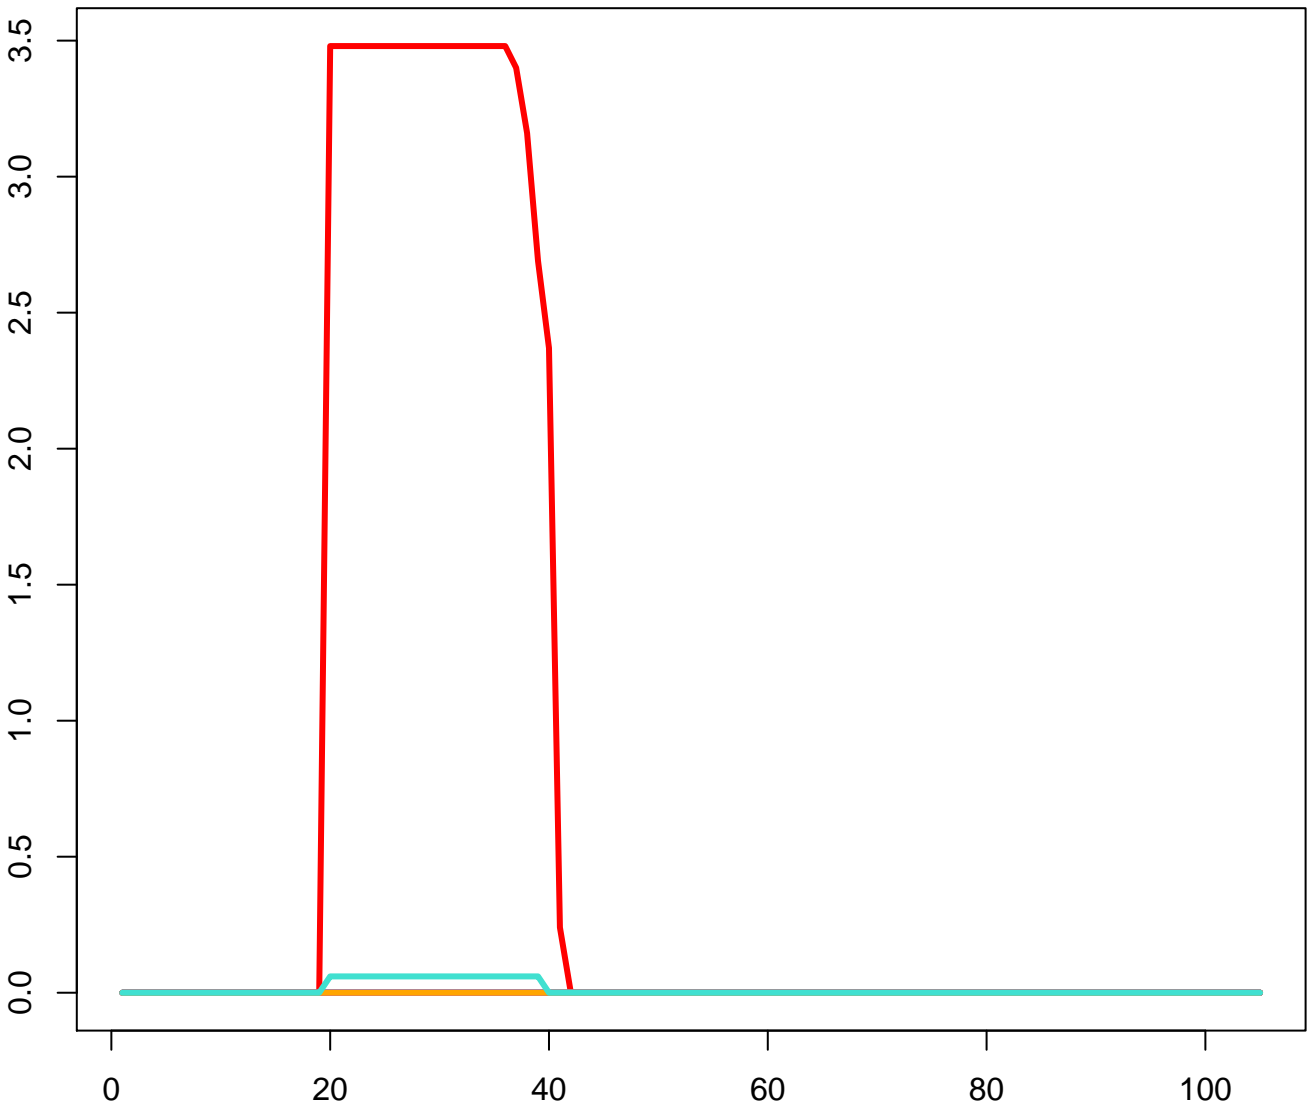

— blood — brain — heart — kidney — lung — ovary — skin — muscle — testis

# X\_87389790-87389885(+)\_cfa-mir-764\_high

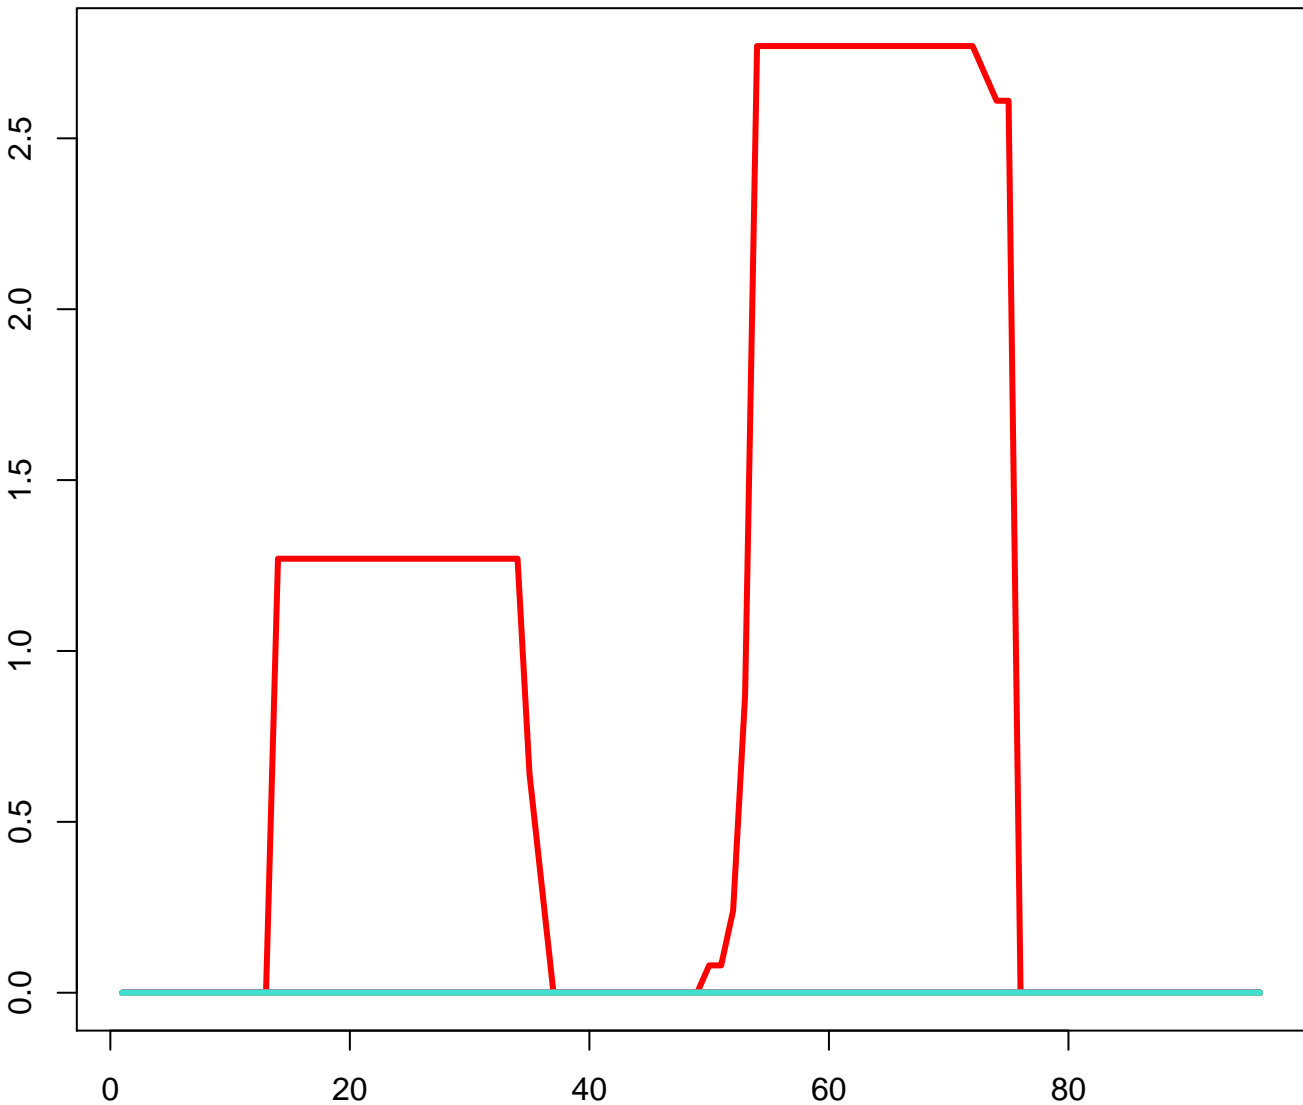

— blood — brain — heart — kidney — lung — ovary — skin — muscle — testis



# X\_87400541-87400601(+)\_mir-1912\_high

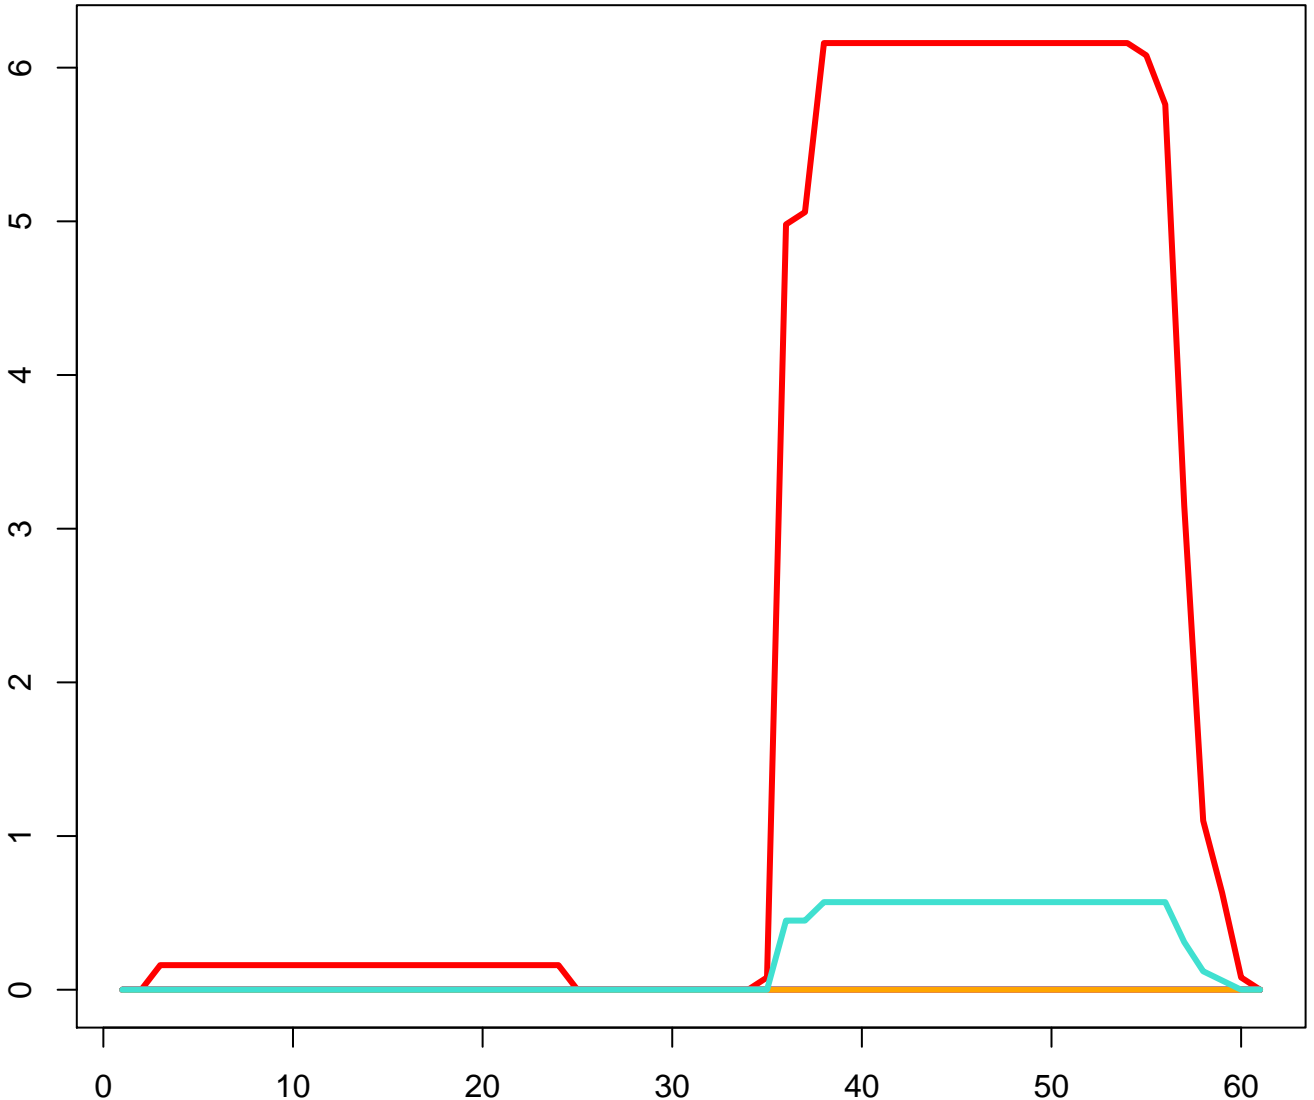

— blood — brain — heart — kidney — lung — ovary — skin — muscle — testis

# X\_87401649-87401716(+)\_mir-1264\_high

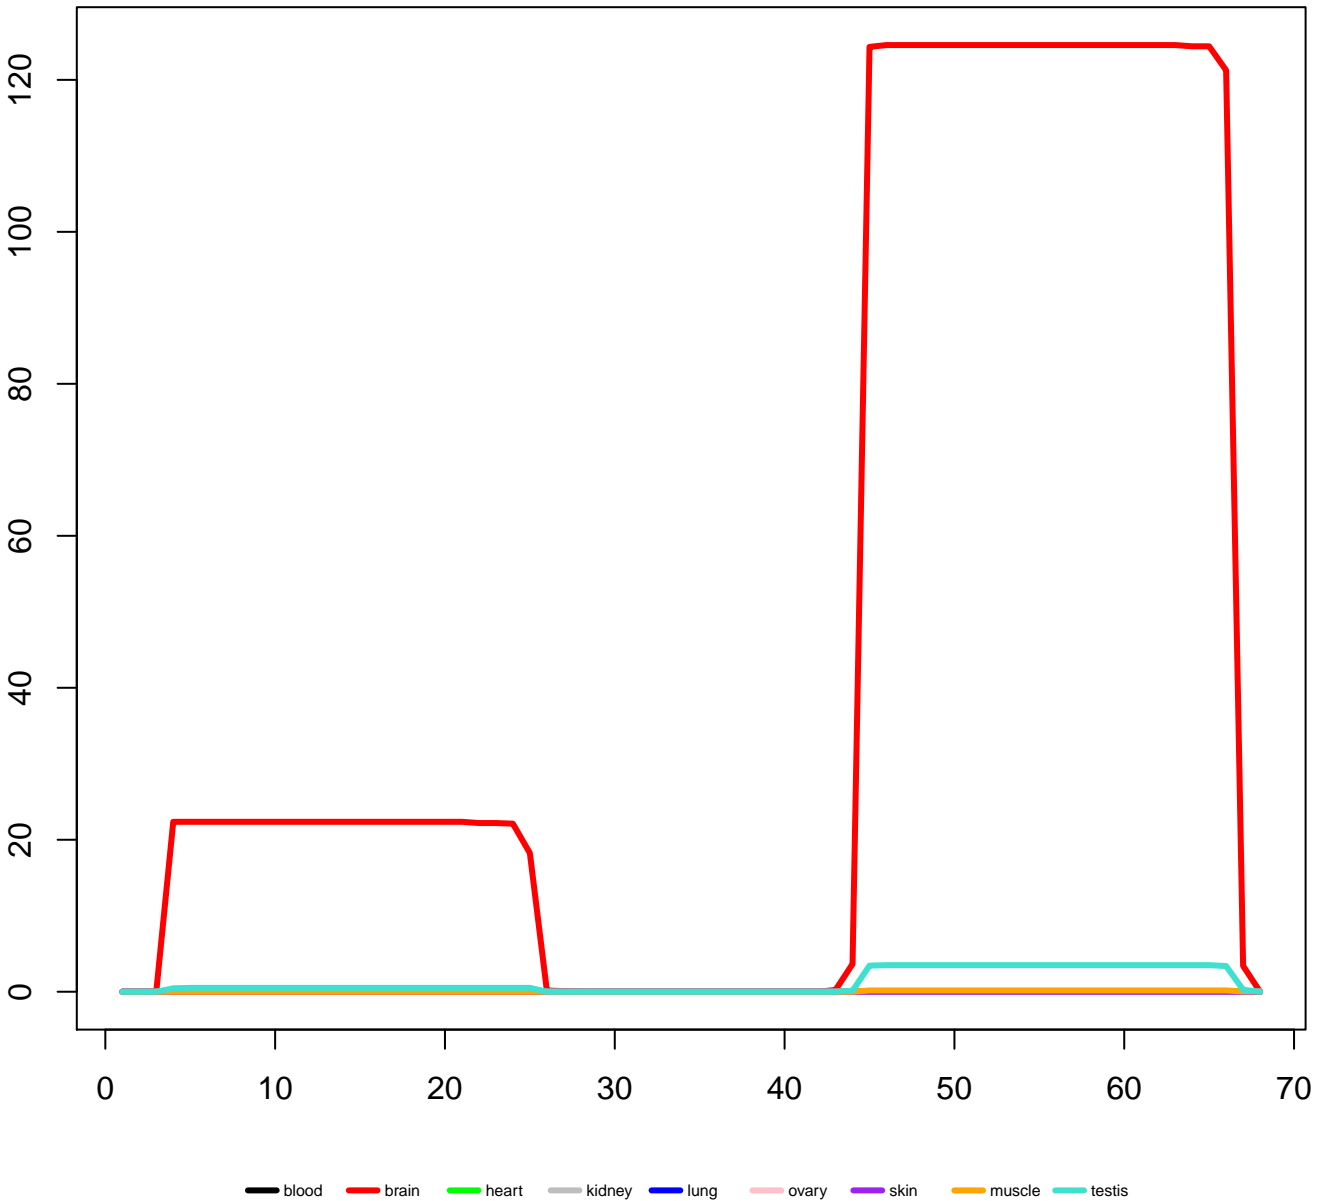





# X\_87558063-87558172(+)\_cfa-mir-448\_high

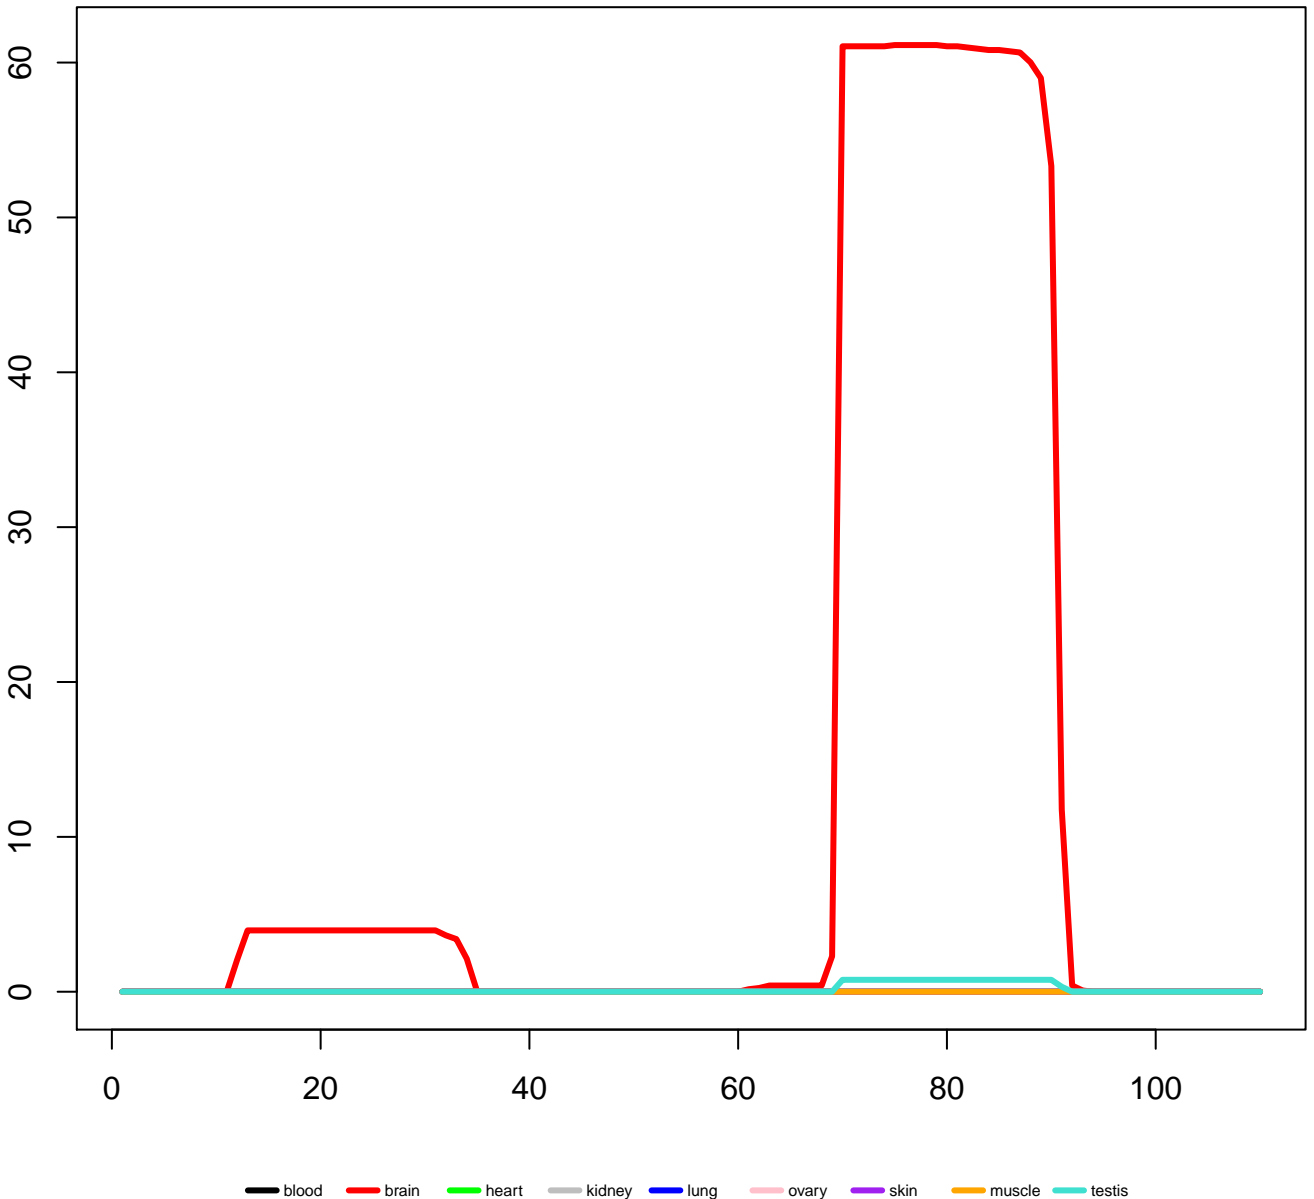

# X\_93909532-93909646(+)\_cfa-mir-8904b\_low

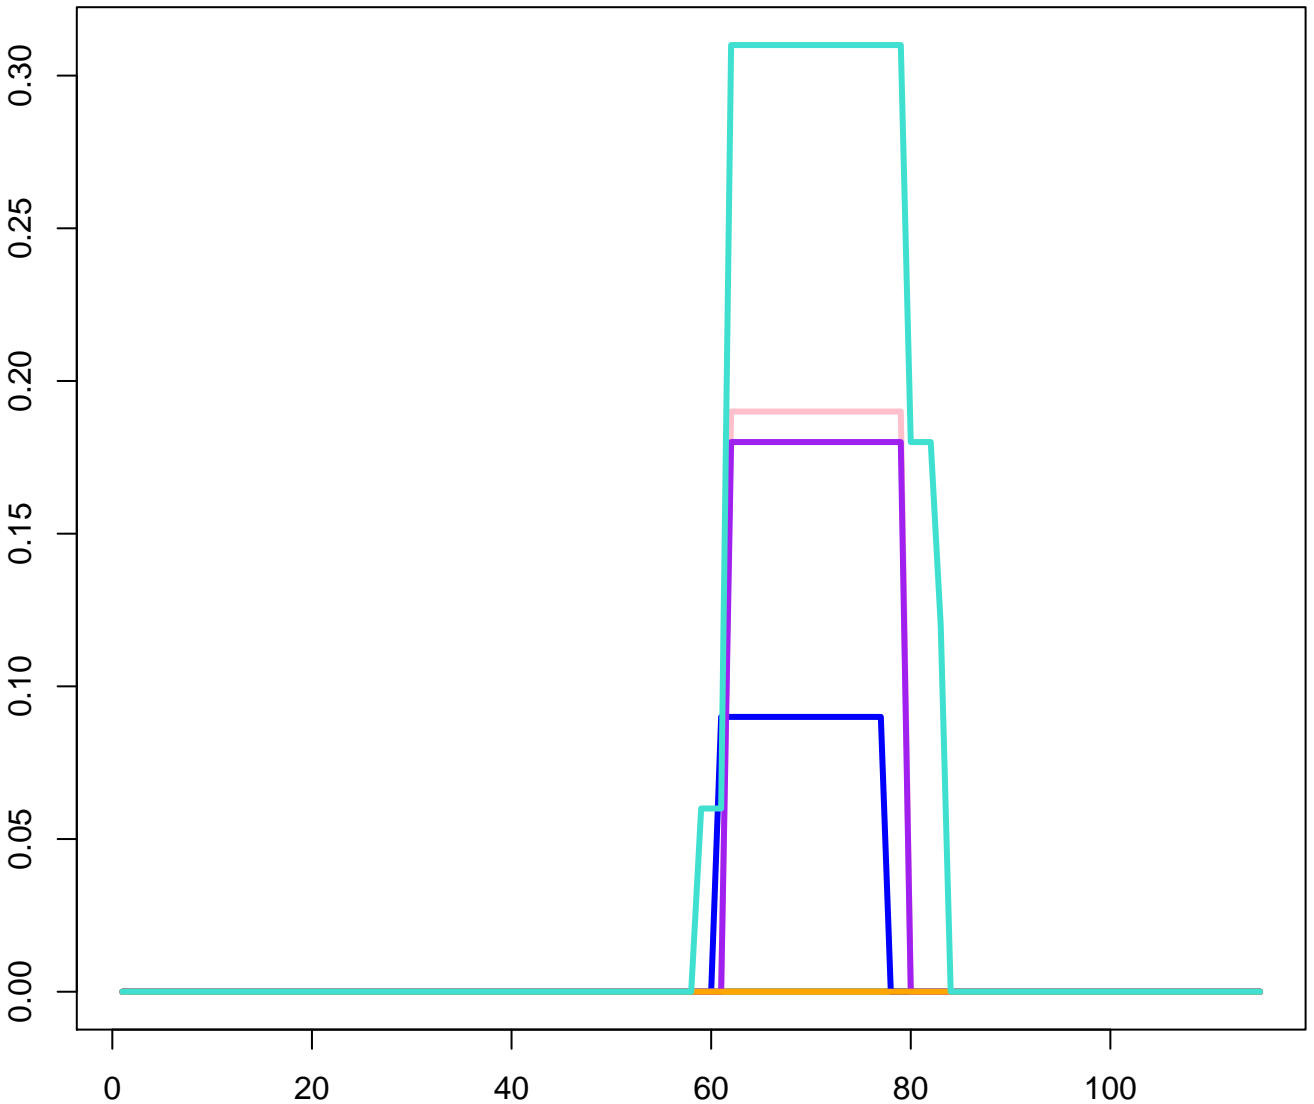

blood brain heart kidney lung ovary skin muscle testis

# X\_94981706-94981782(+)\_mir-2985\_low

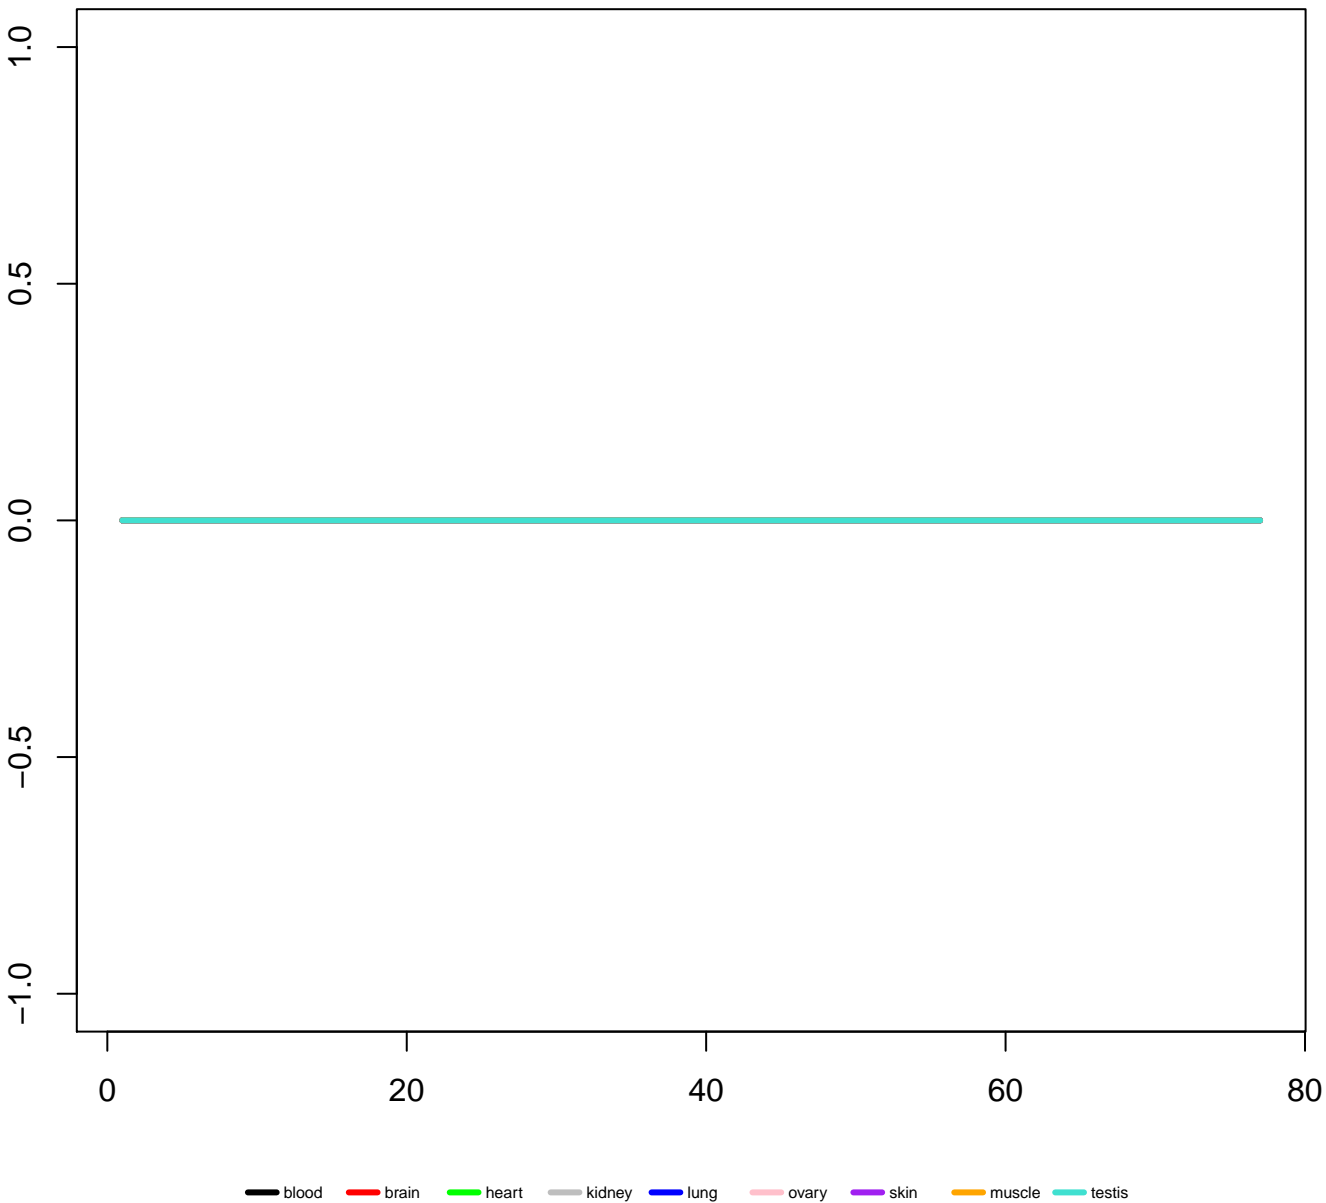

# X\_96560867-96561005(-)\_cfa-mir-2483\_high

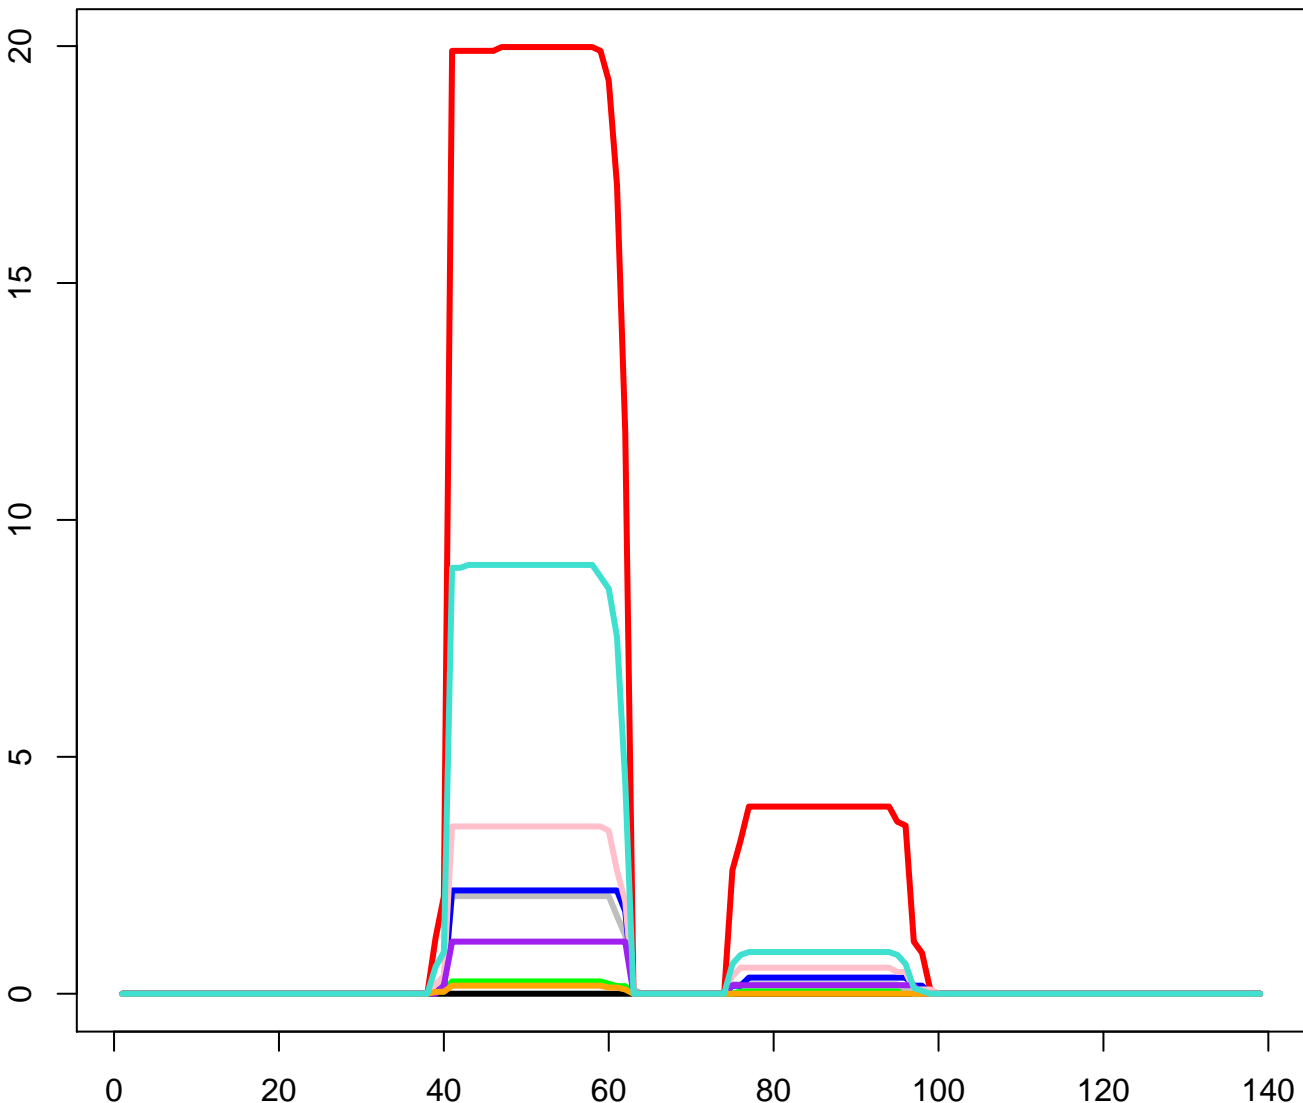

— blood — brain — heart — kidney — lung — ovary — skin — muscle — testis



# X\_104895657-104895723(-)\_cfa-mir-363\_high

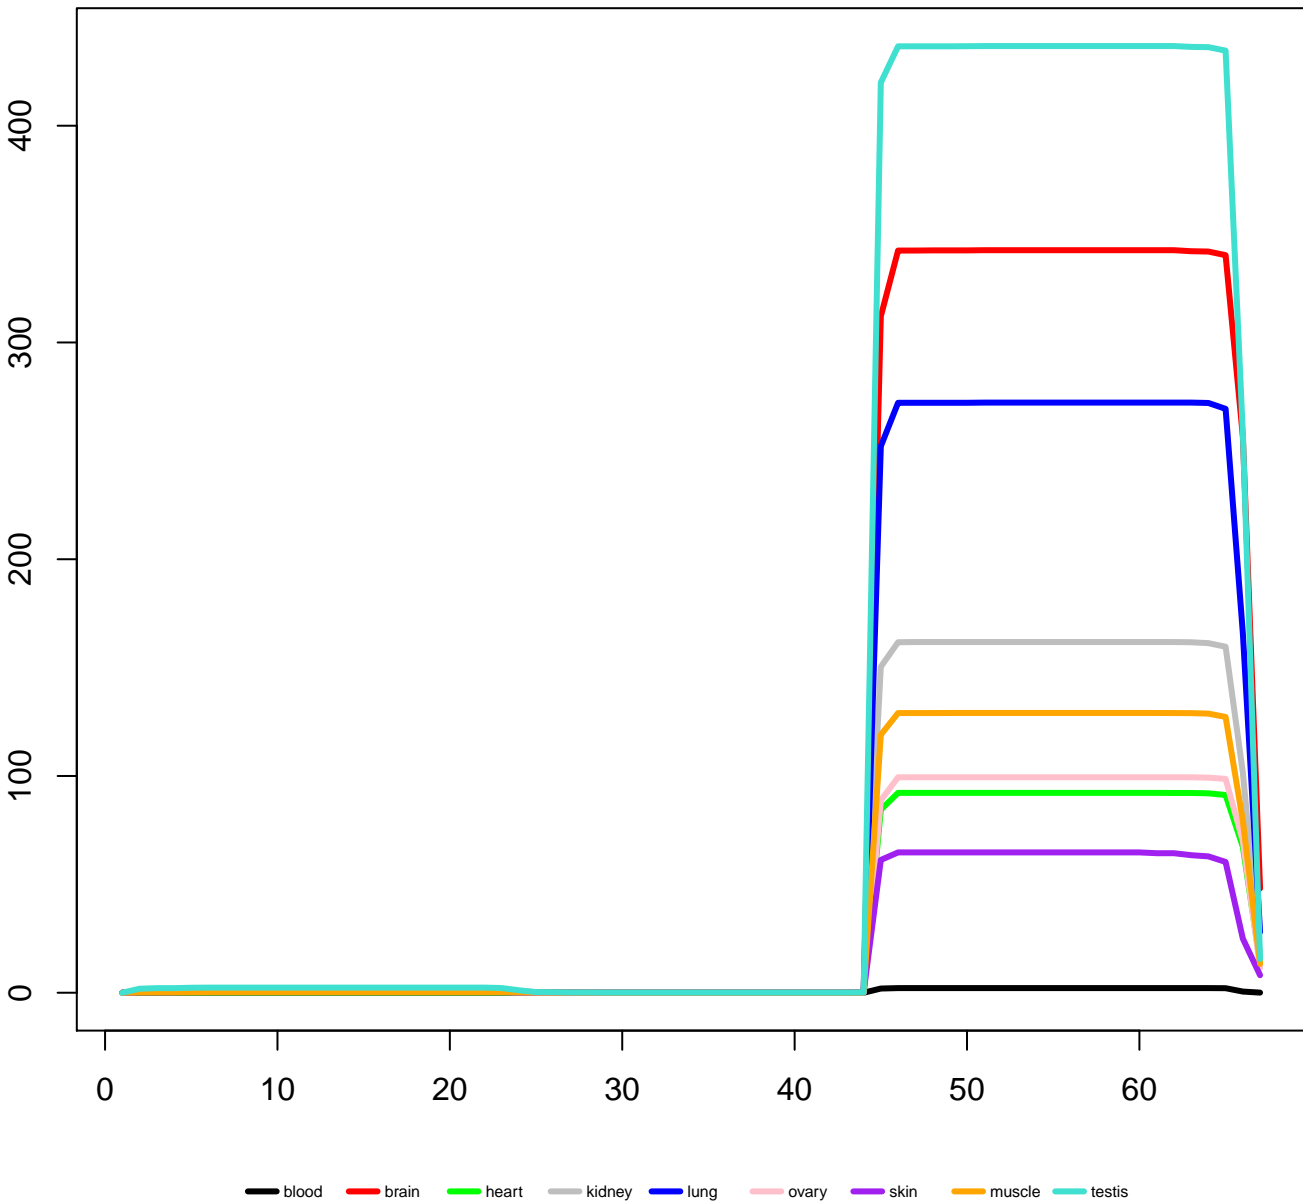

# X\_104895826-104895886(-)\_cfa-mir-92a-2\_high

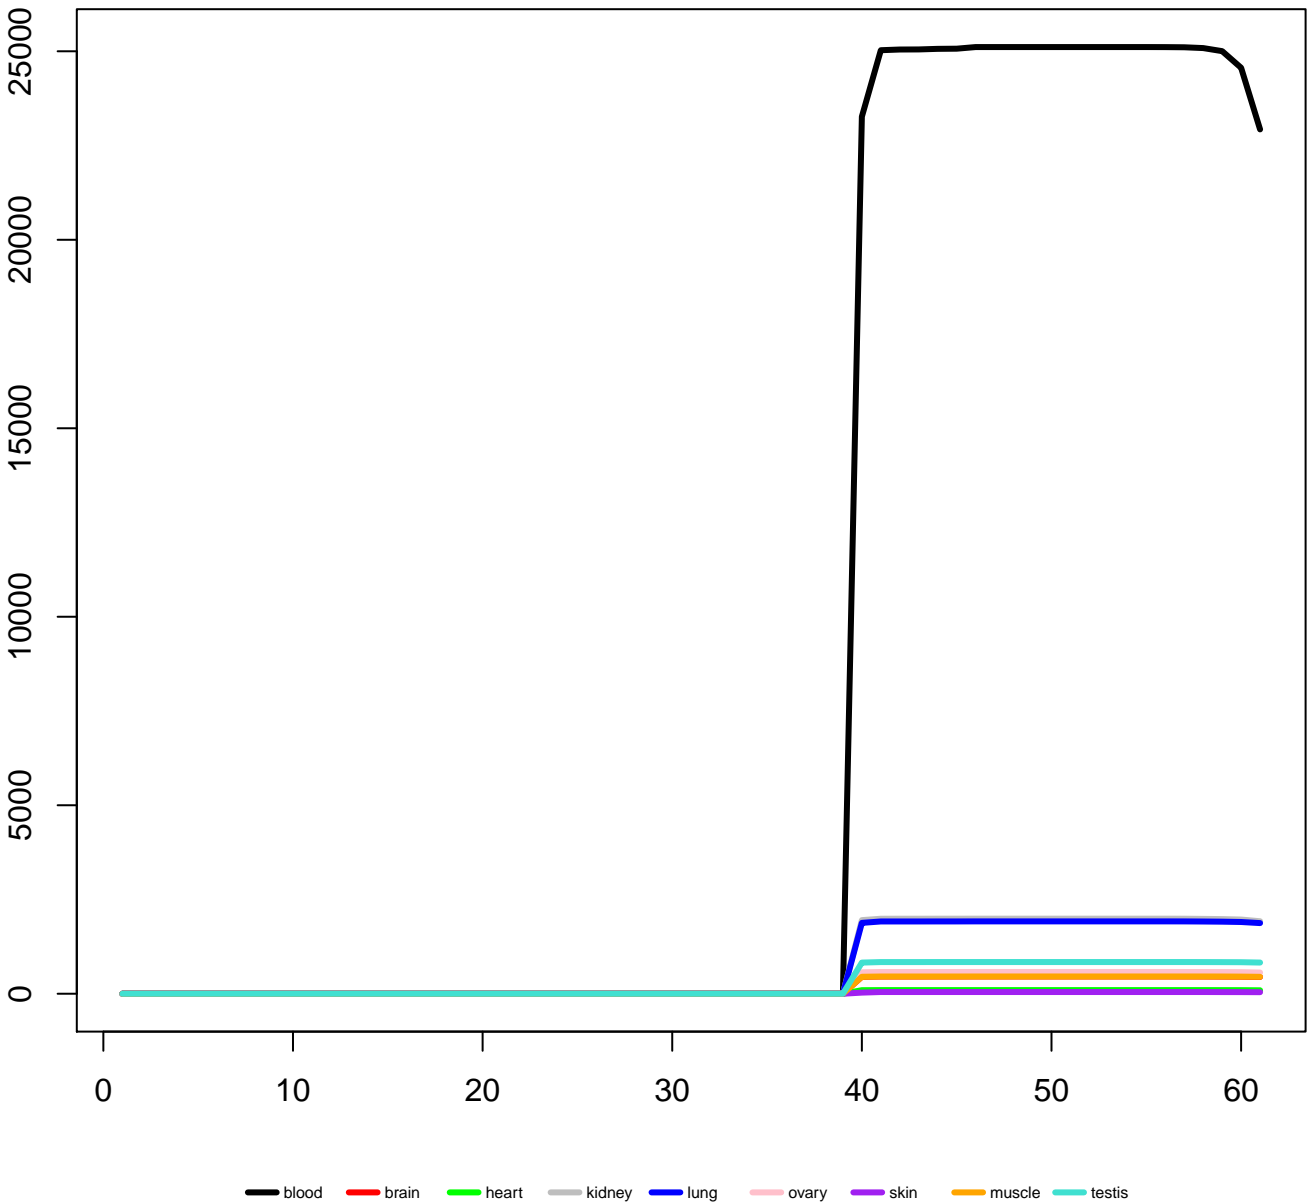

# X\_104895962-104896025(-)\_cfa-mir-19b-2\_high

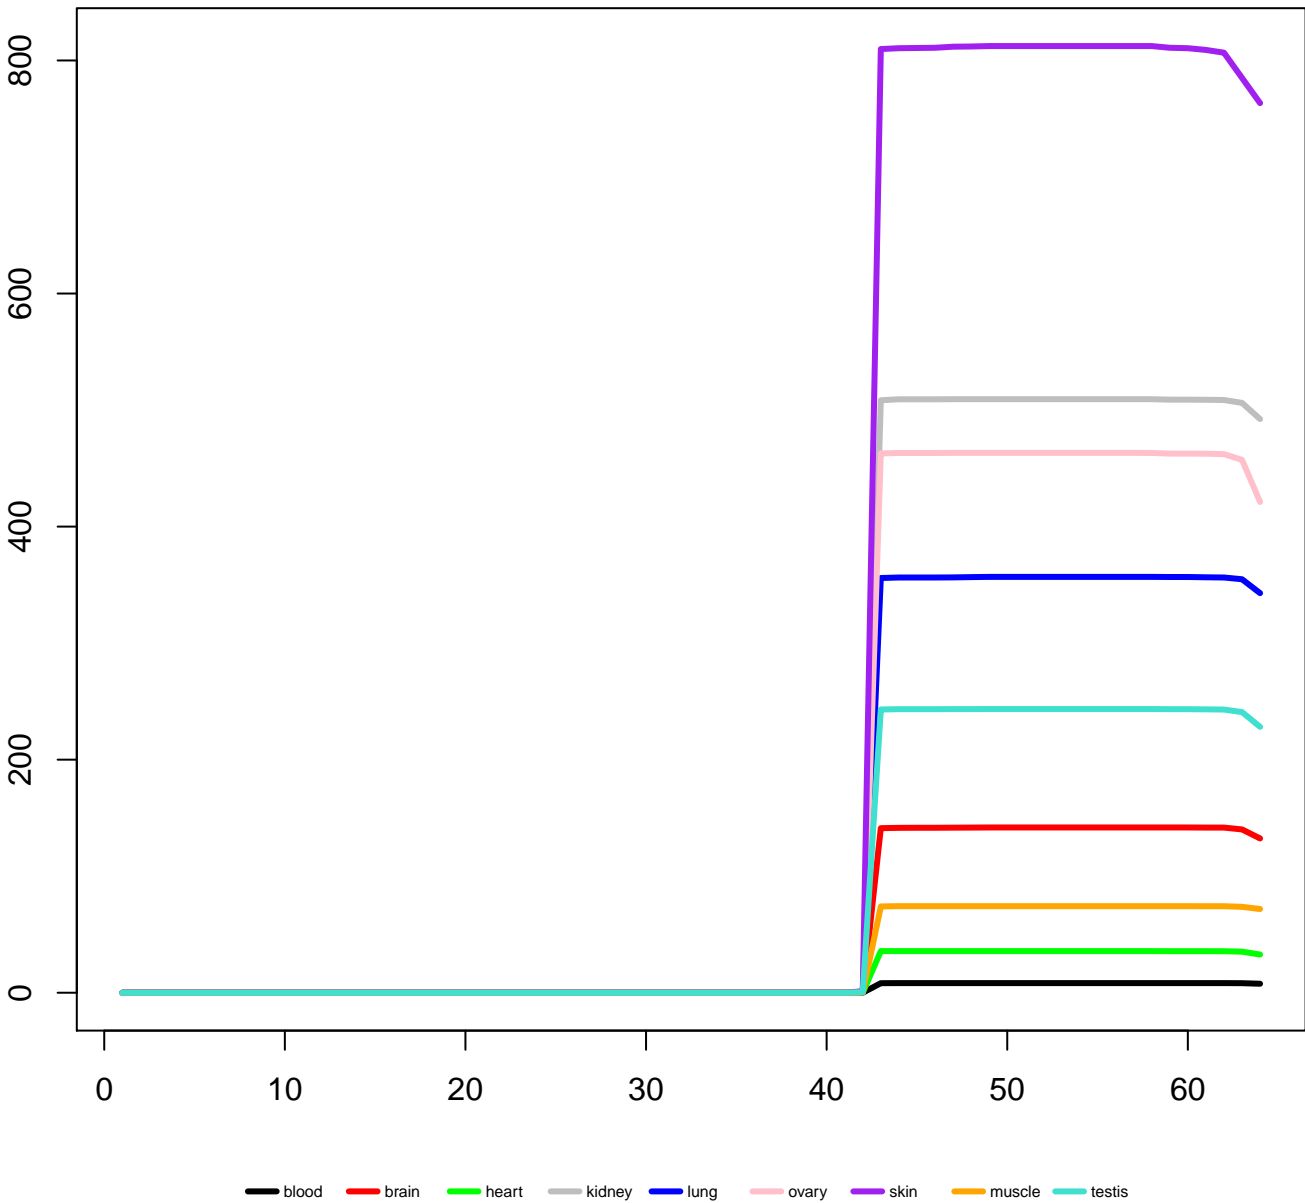



# X\_104896339-104896415(-)\_cfa-mir-18b\_high

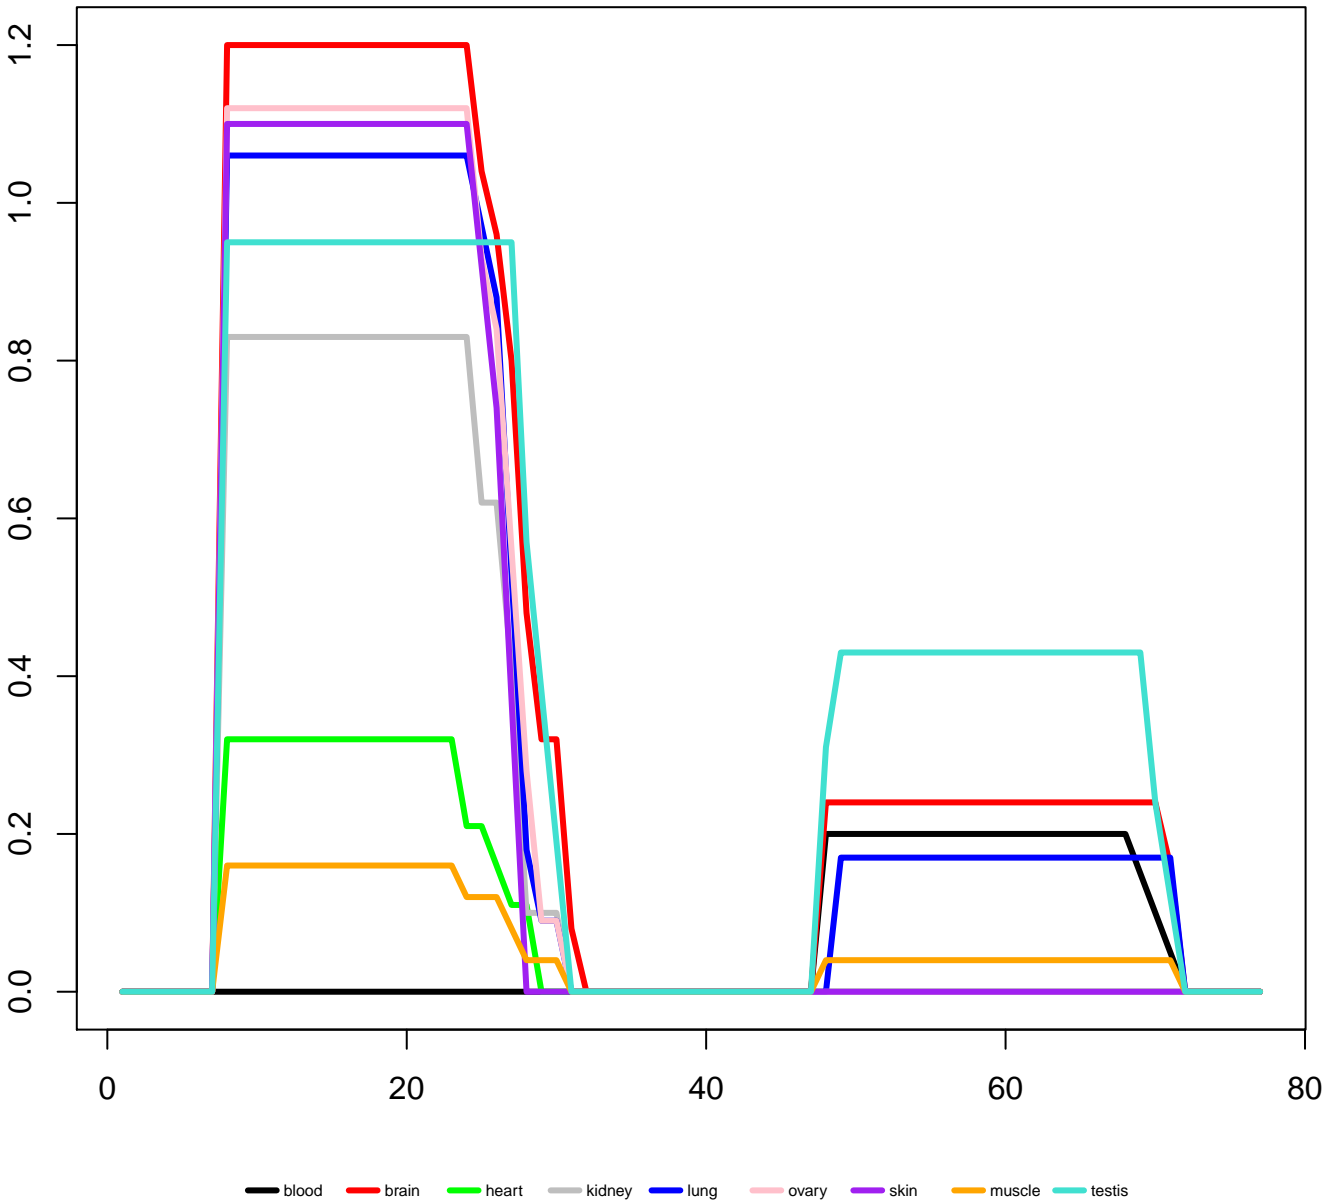

# X\_104896518-104896574(-)\_cfa-mir-106a\_high

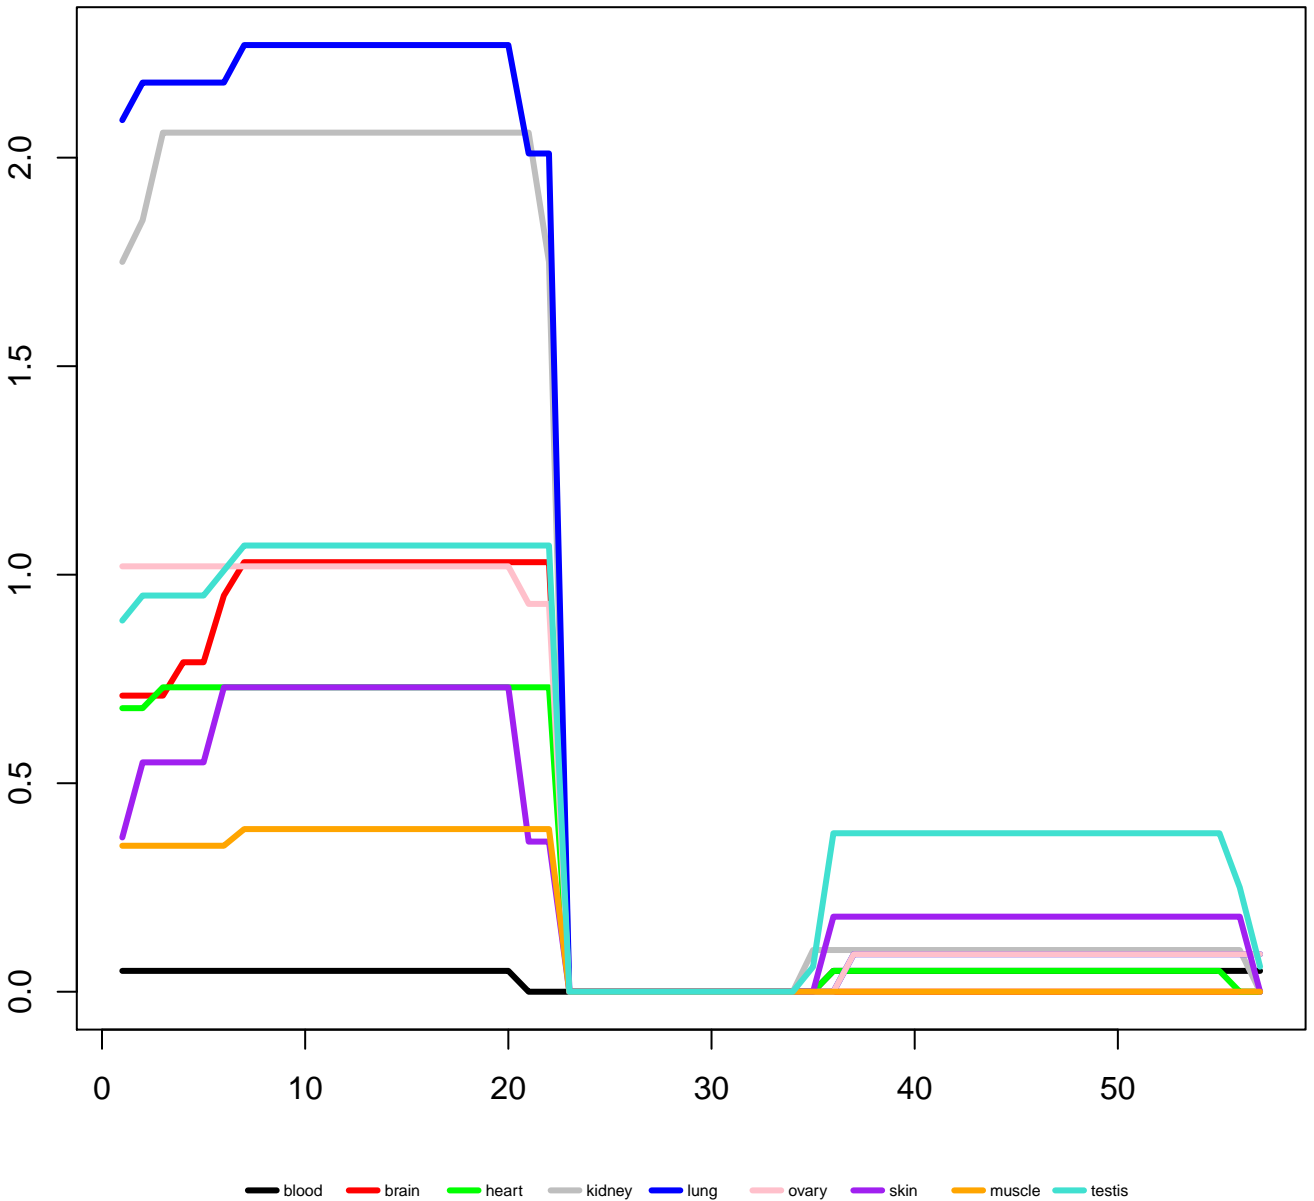

# X\_105177287-105177344(-)\_cfa-mir-450b\_high

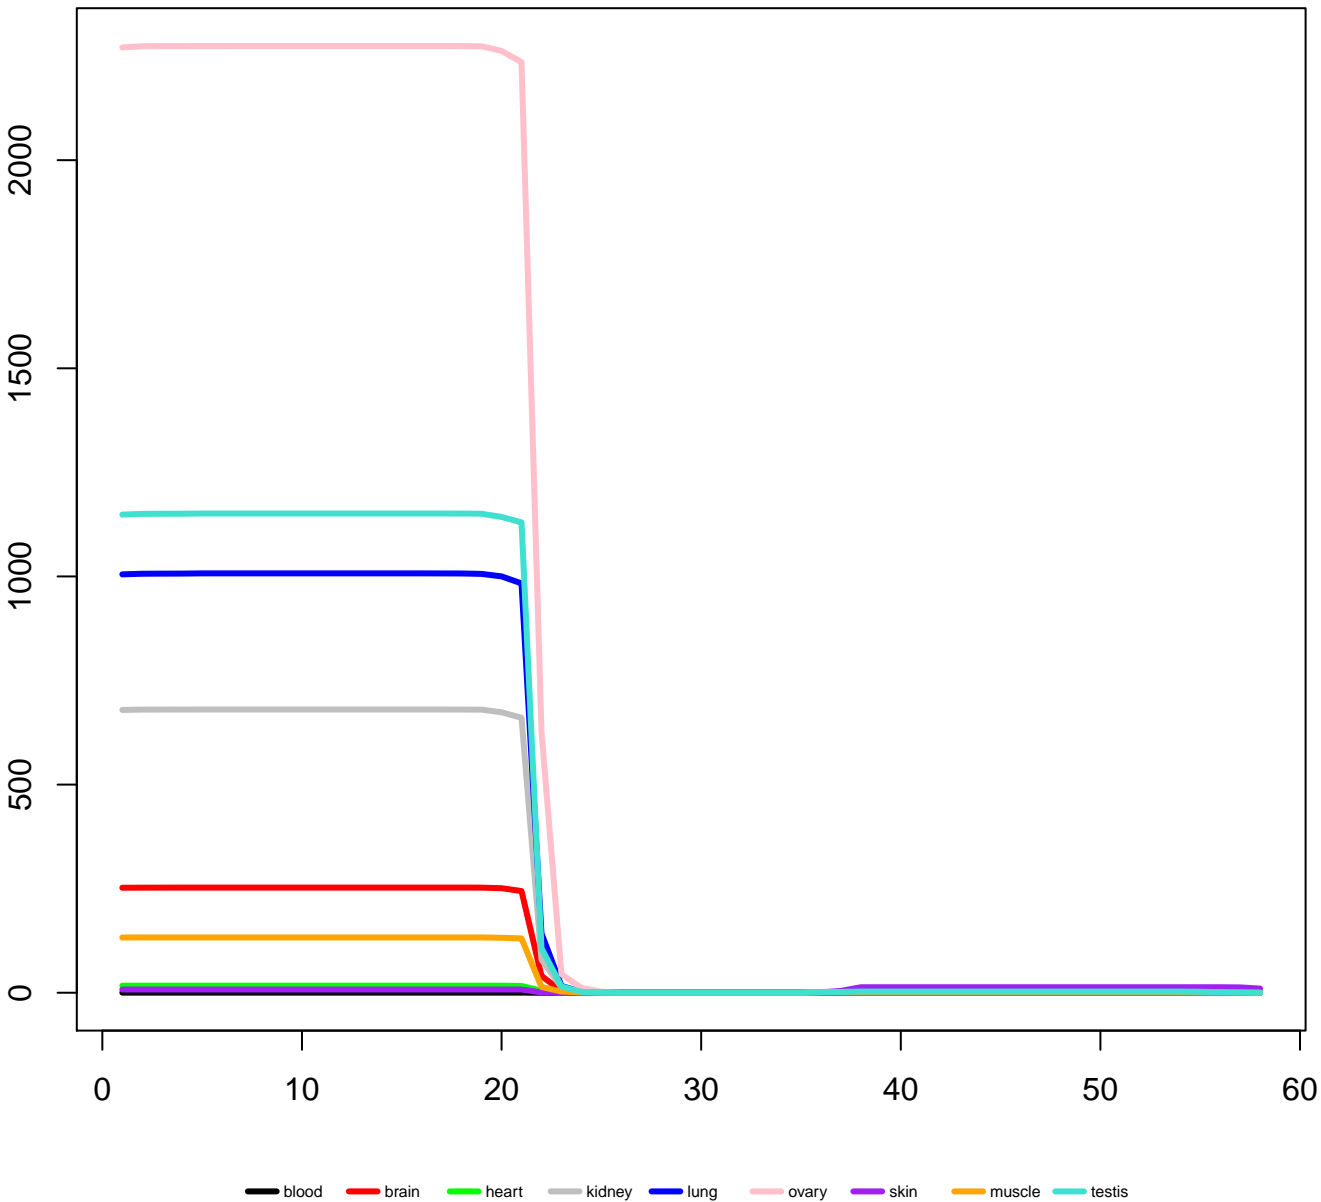





# X\_105177585-105177648(-)\_mir-450\_high

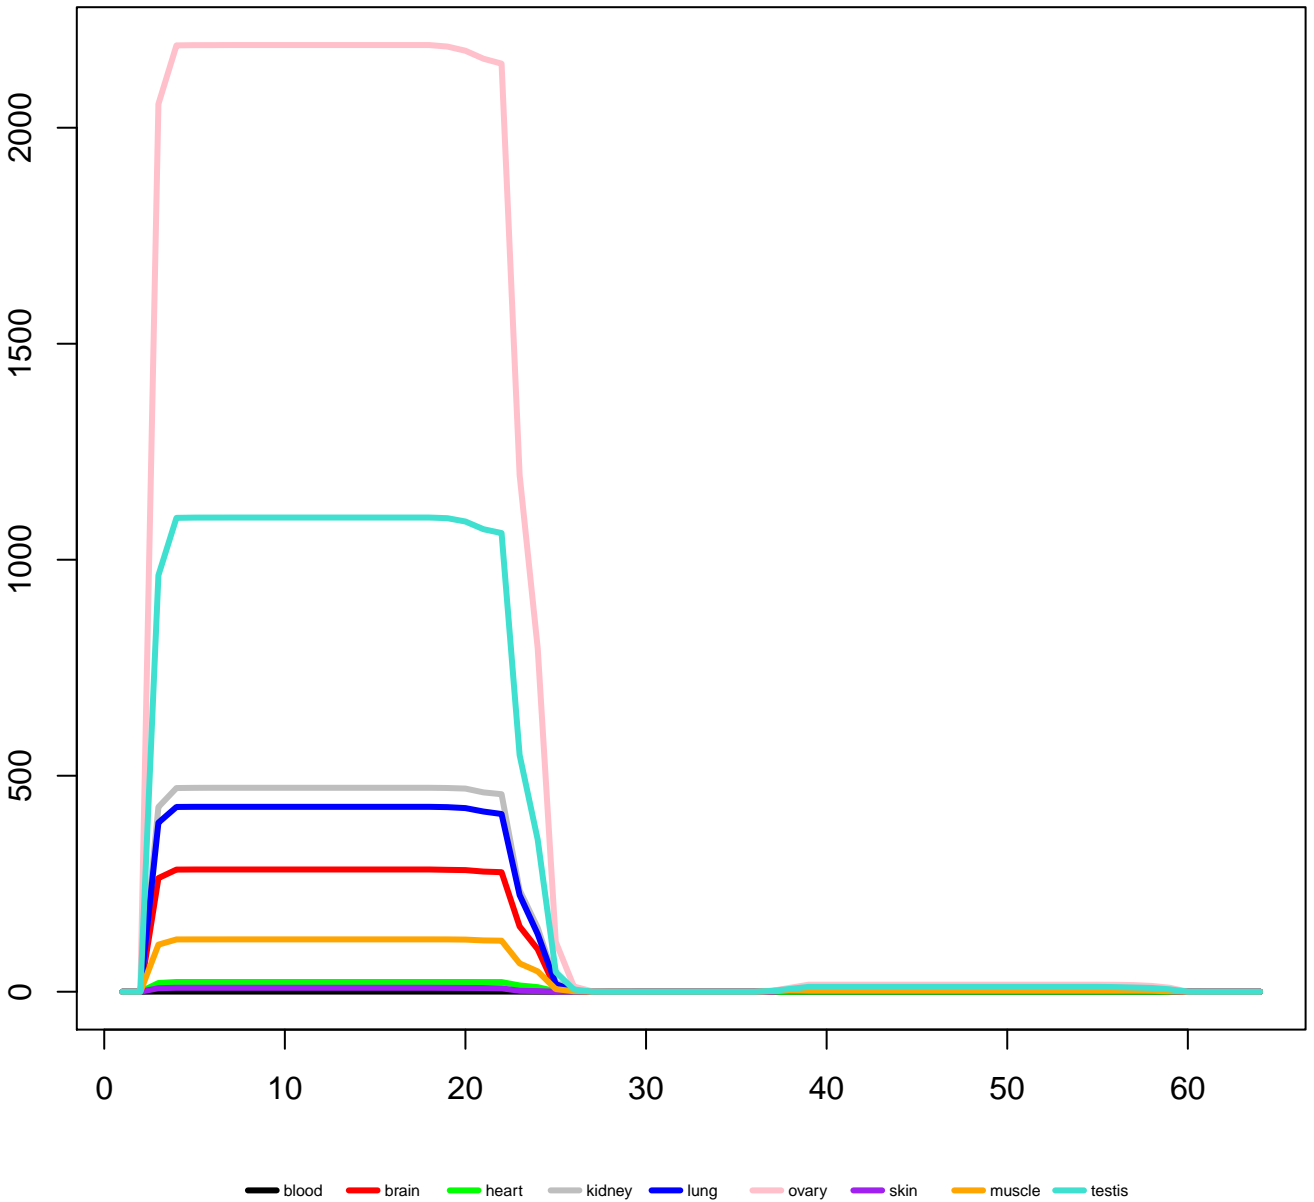

# X\_105178351-105178428(+)\_mir-542\_low

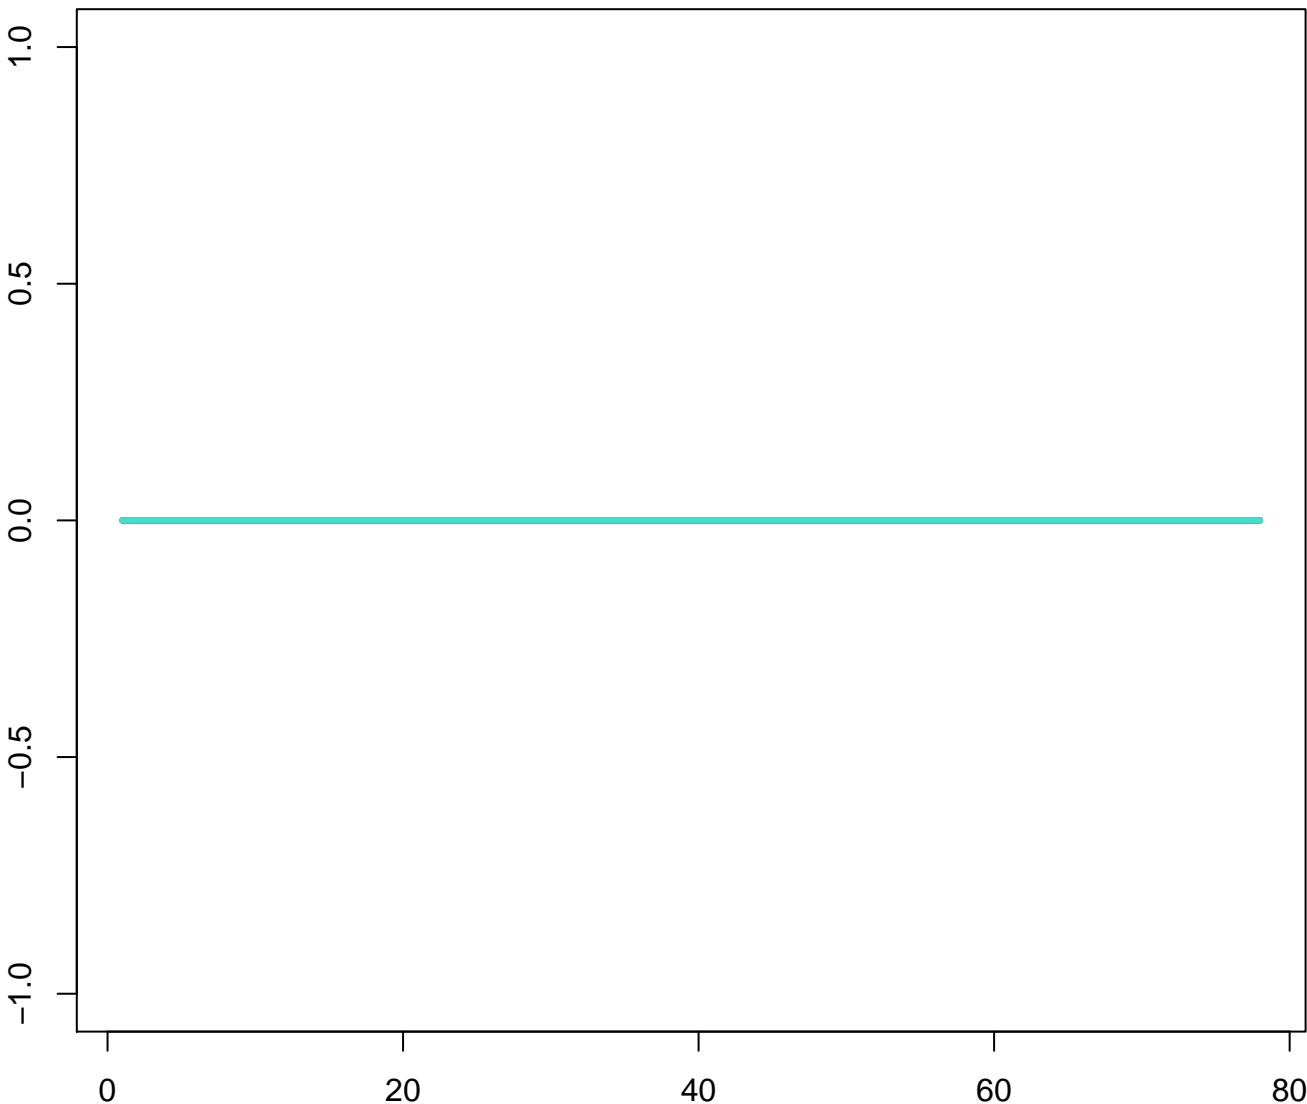

blood brain heart kidney lung ovary skin muscle testis

# X\_105178359-105178417(-)\_cfa-mir-542\_high

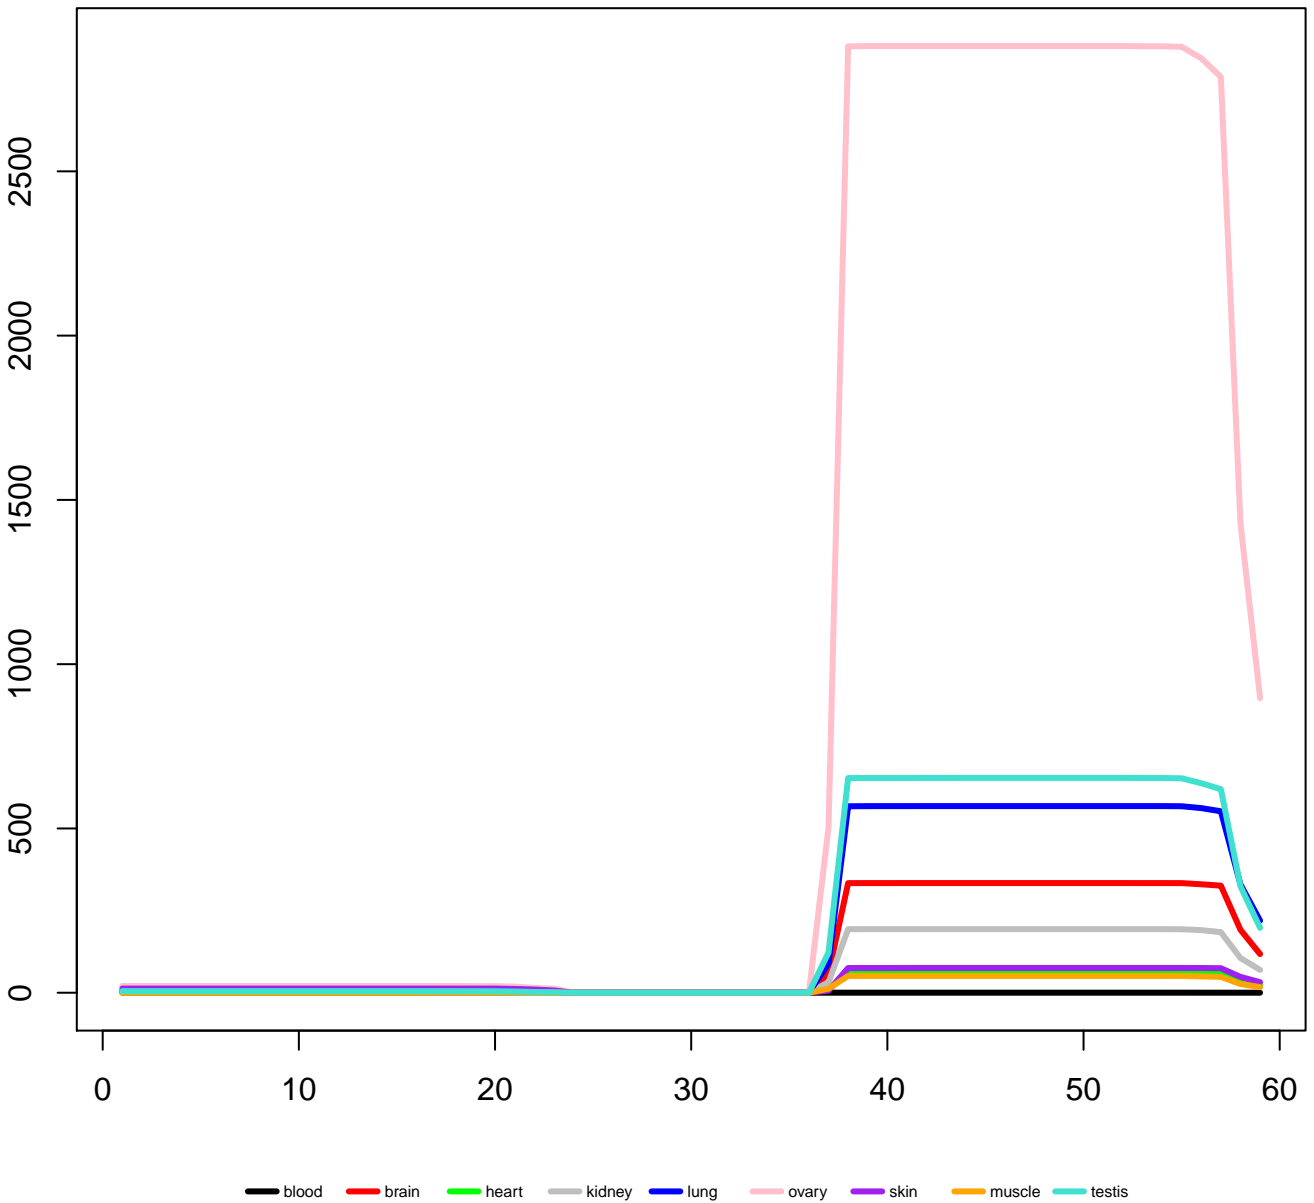

# X\_105183139-105183201(-)\_cfa-mir-503\_high

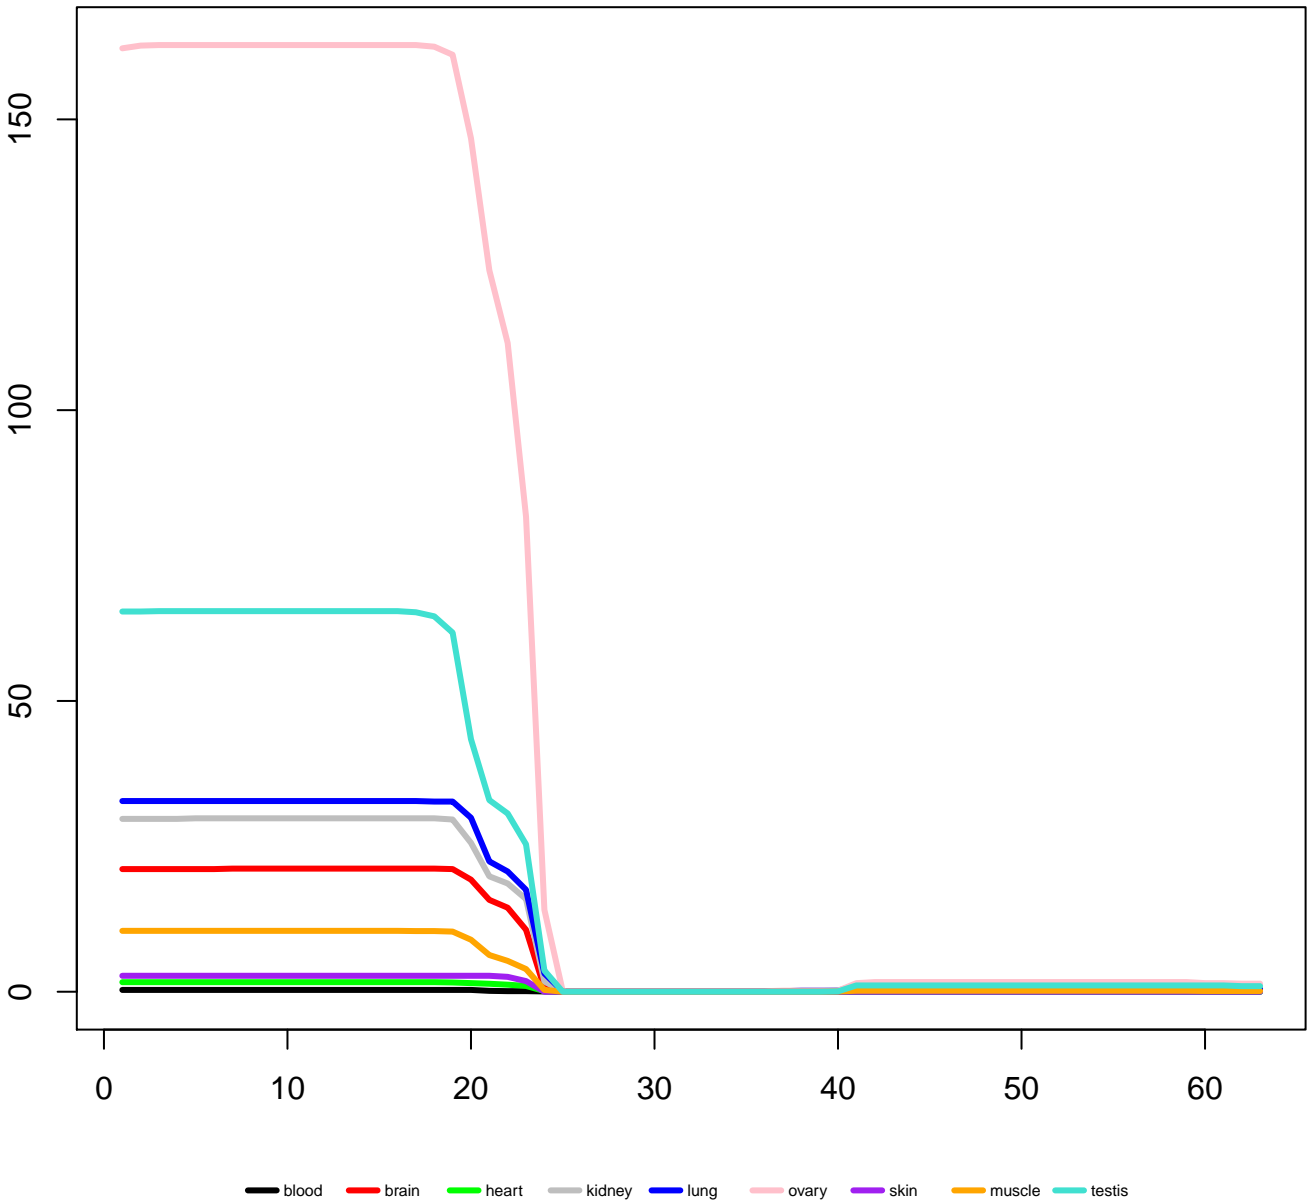

# X\_105183437-105183493(-)\_cfa-mir-424\_high

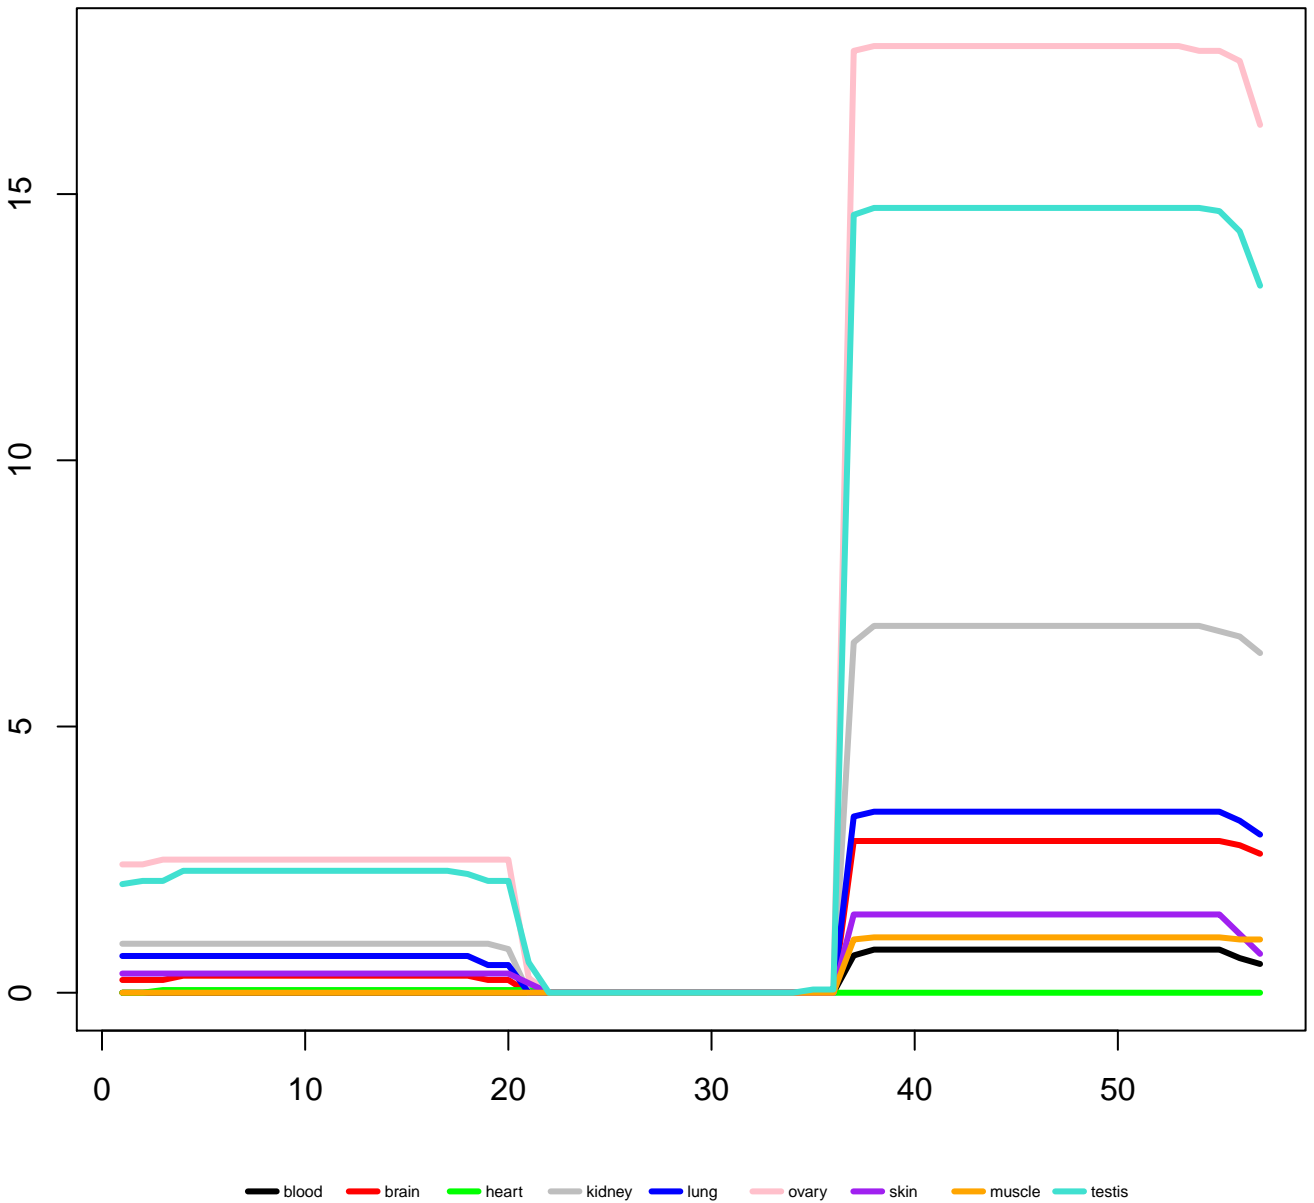

# X\_108693063-108693145(-)\_cfa-mir-504\_high

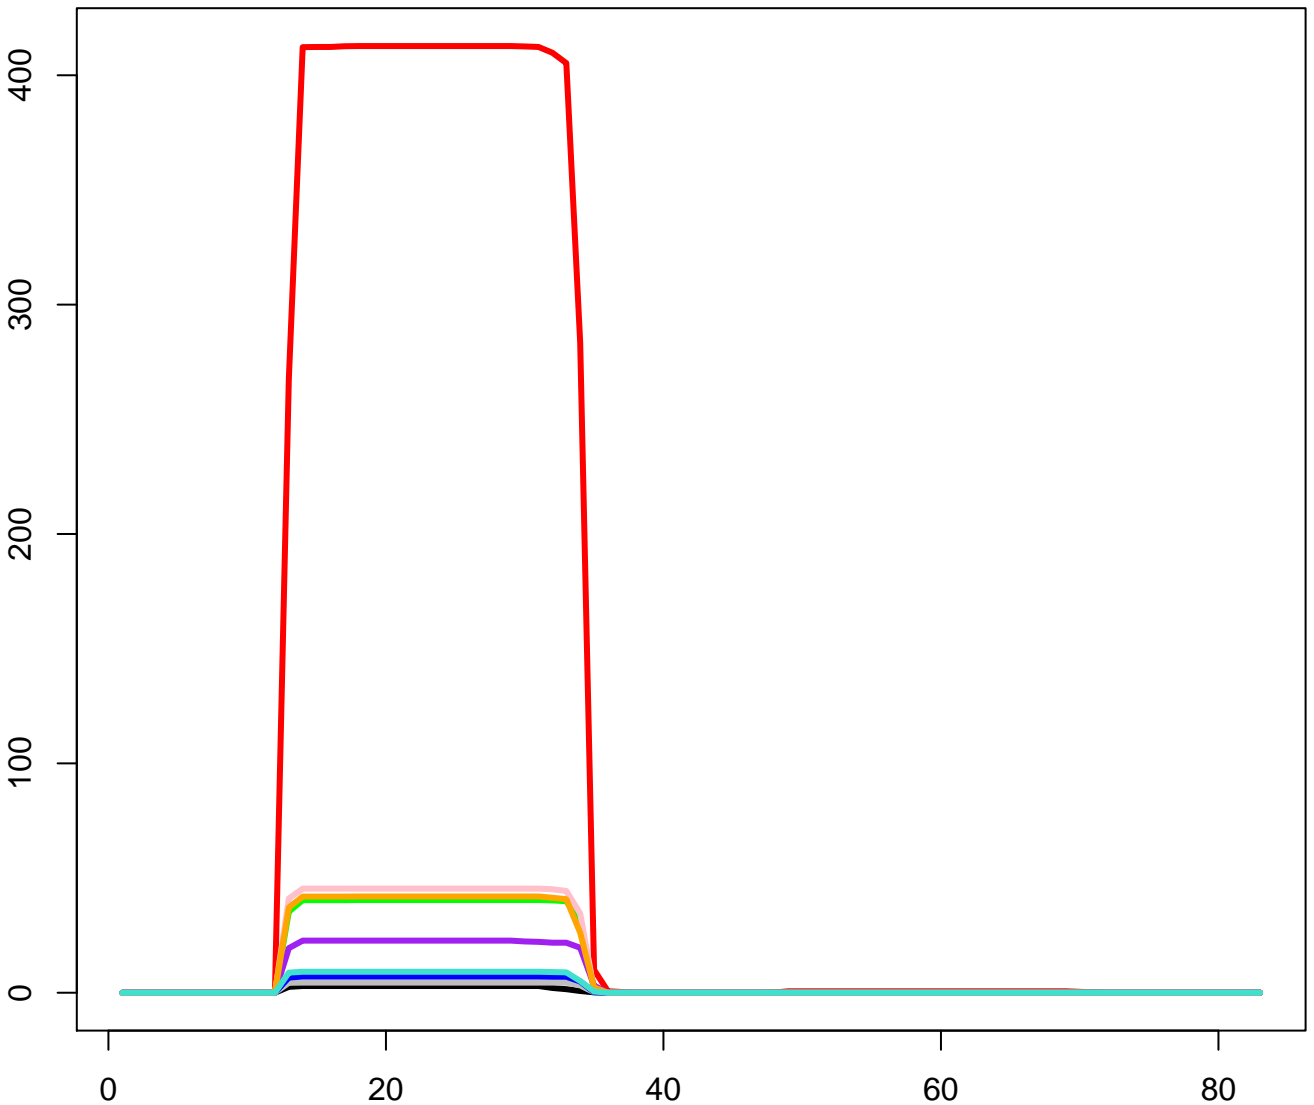

blood brain heart kidney lung ovary skin muscle testis



# X\_114675824-114675906(-)\_cfa-mir-8908c\_high

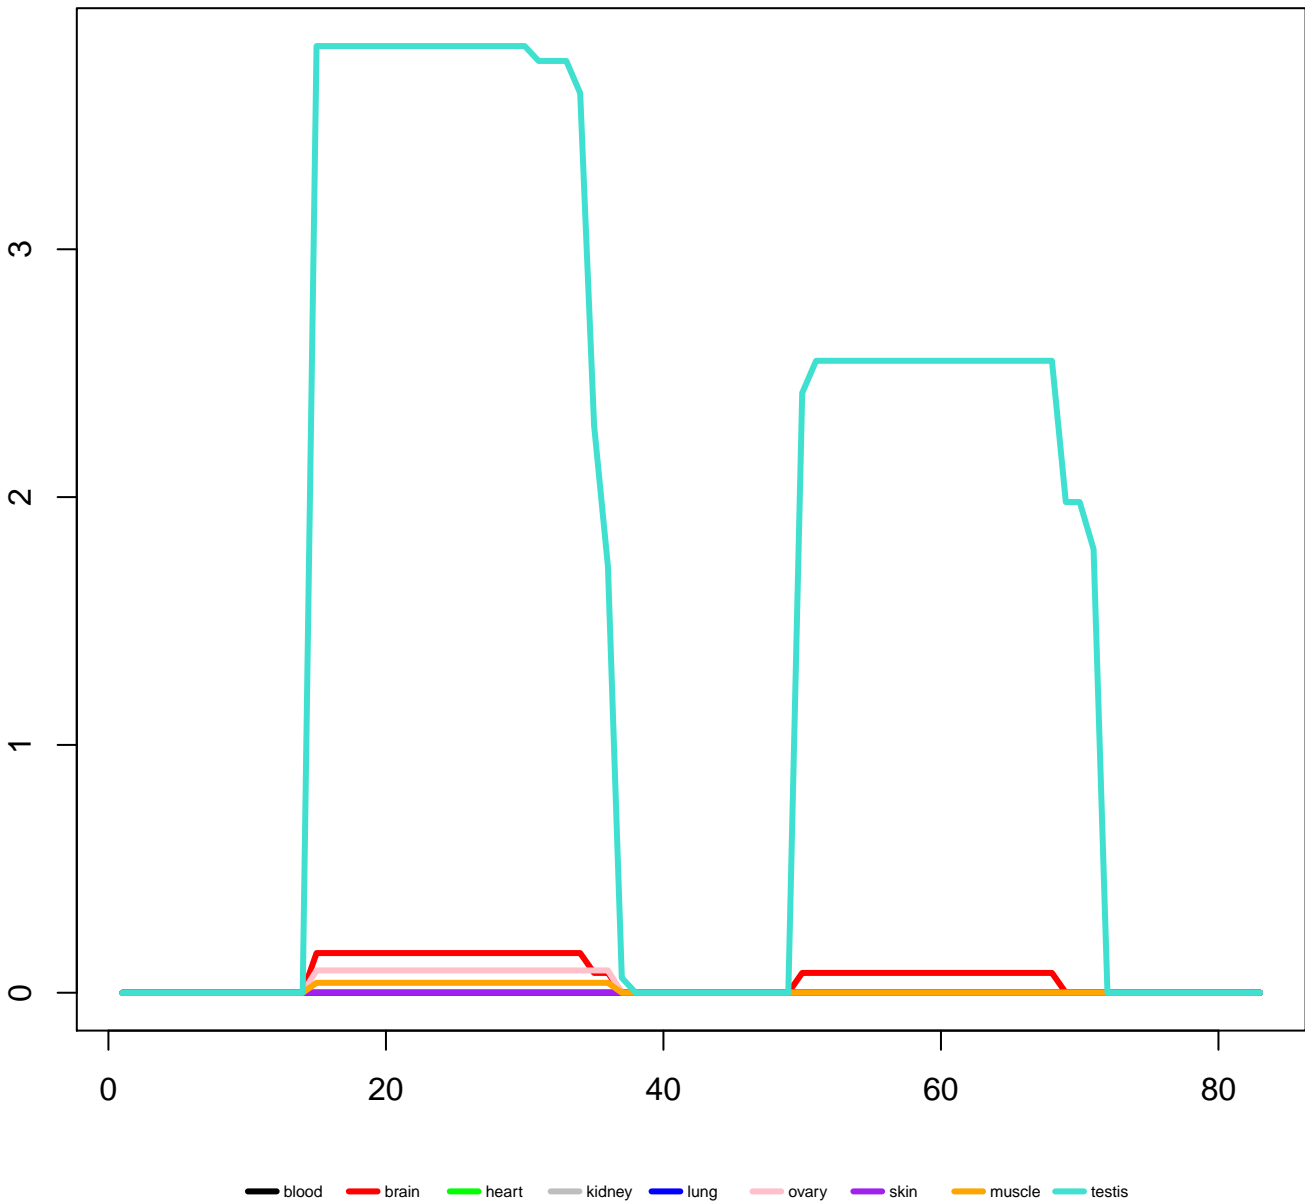





# X\_114678475-114678595(-)\_cfa-mir-8908b\_high

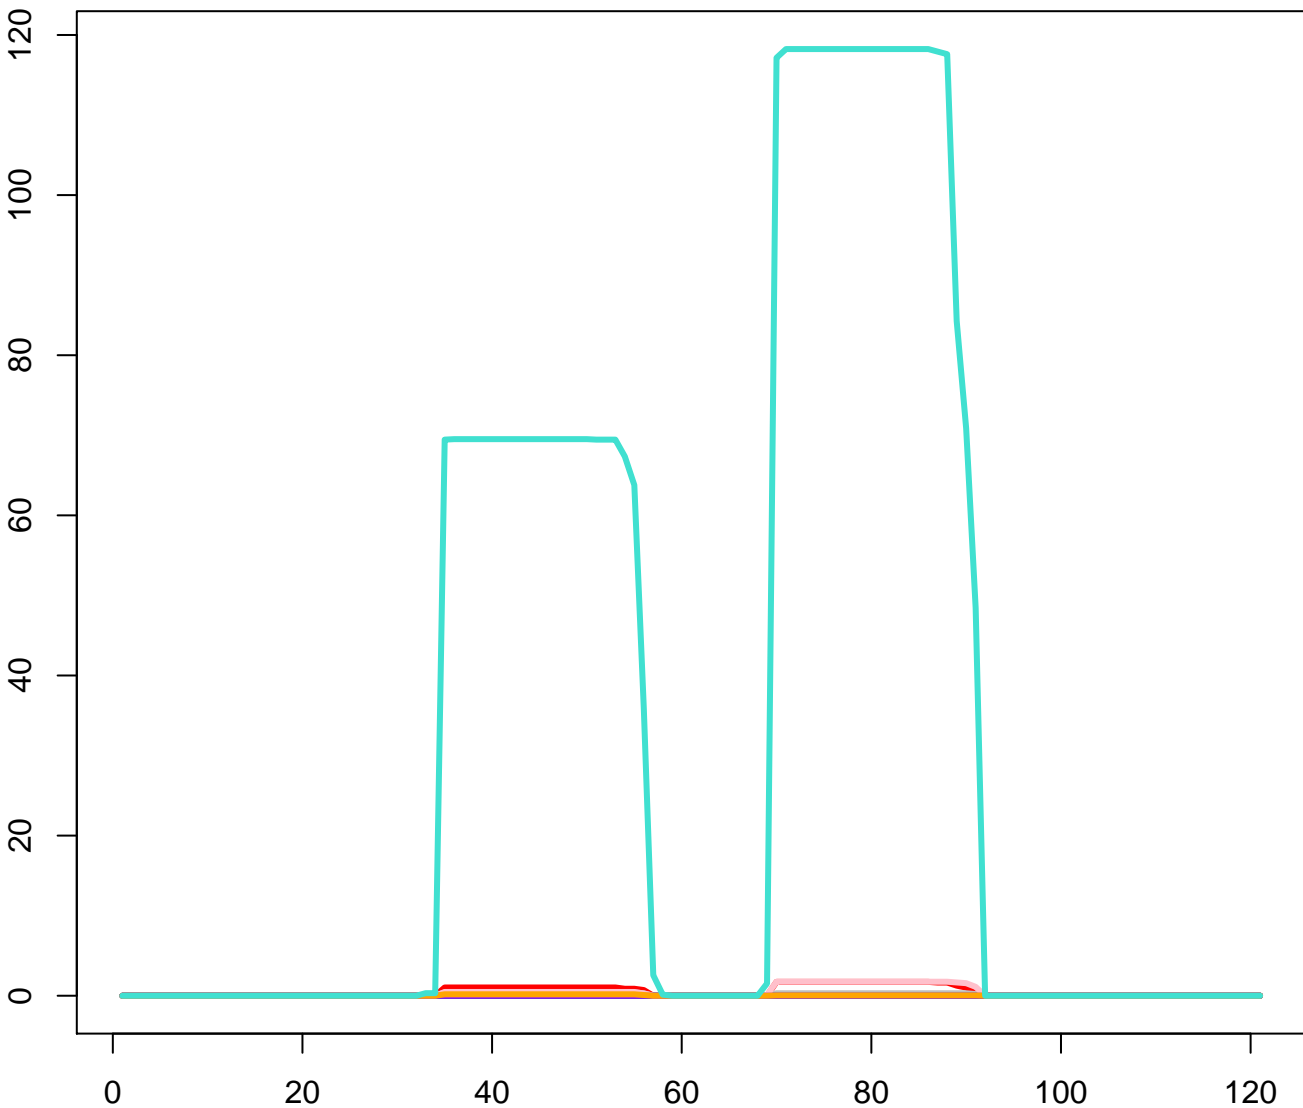

Legend: blood (black), brain (red), heart (green), kidney (grey), lung (blue), ovary (pink), skin (purple), muscle (orange), testis (cyan)

# X\_114679949-114680061(-)\_cfa-mir-8908d-2\_high

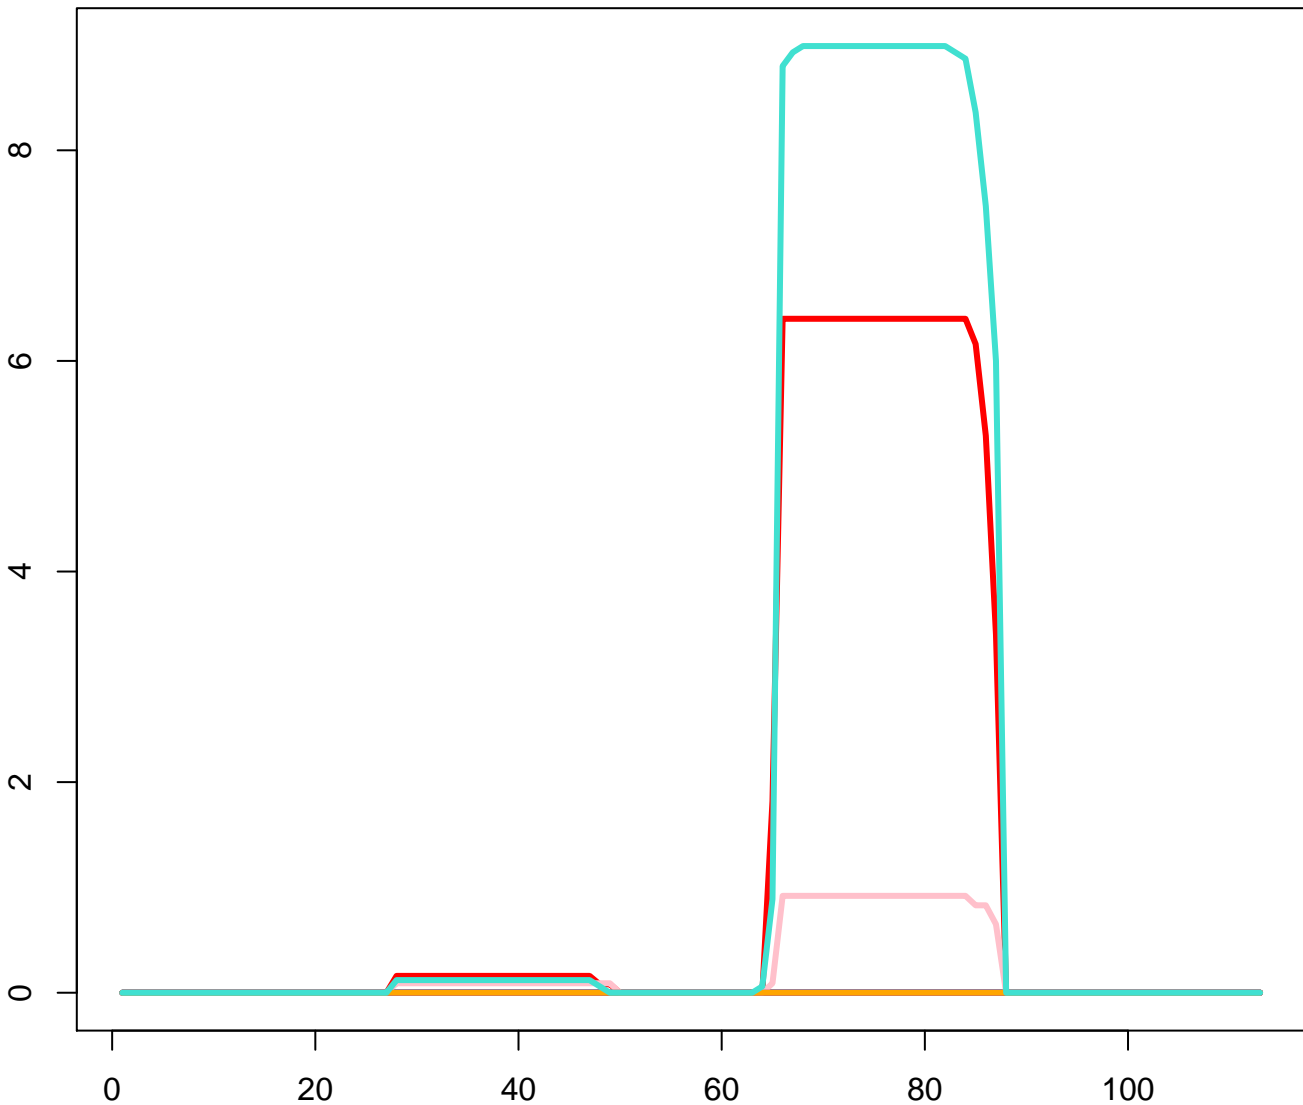

blood brain heart kidney lung ovary skin muscle testis

# X\_114680866-114681010(-)\_cfa-mir-8908a-4\_high

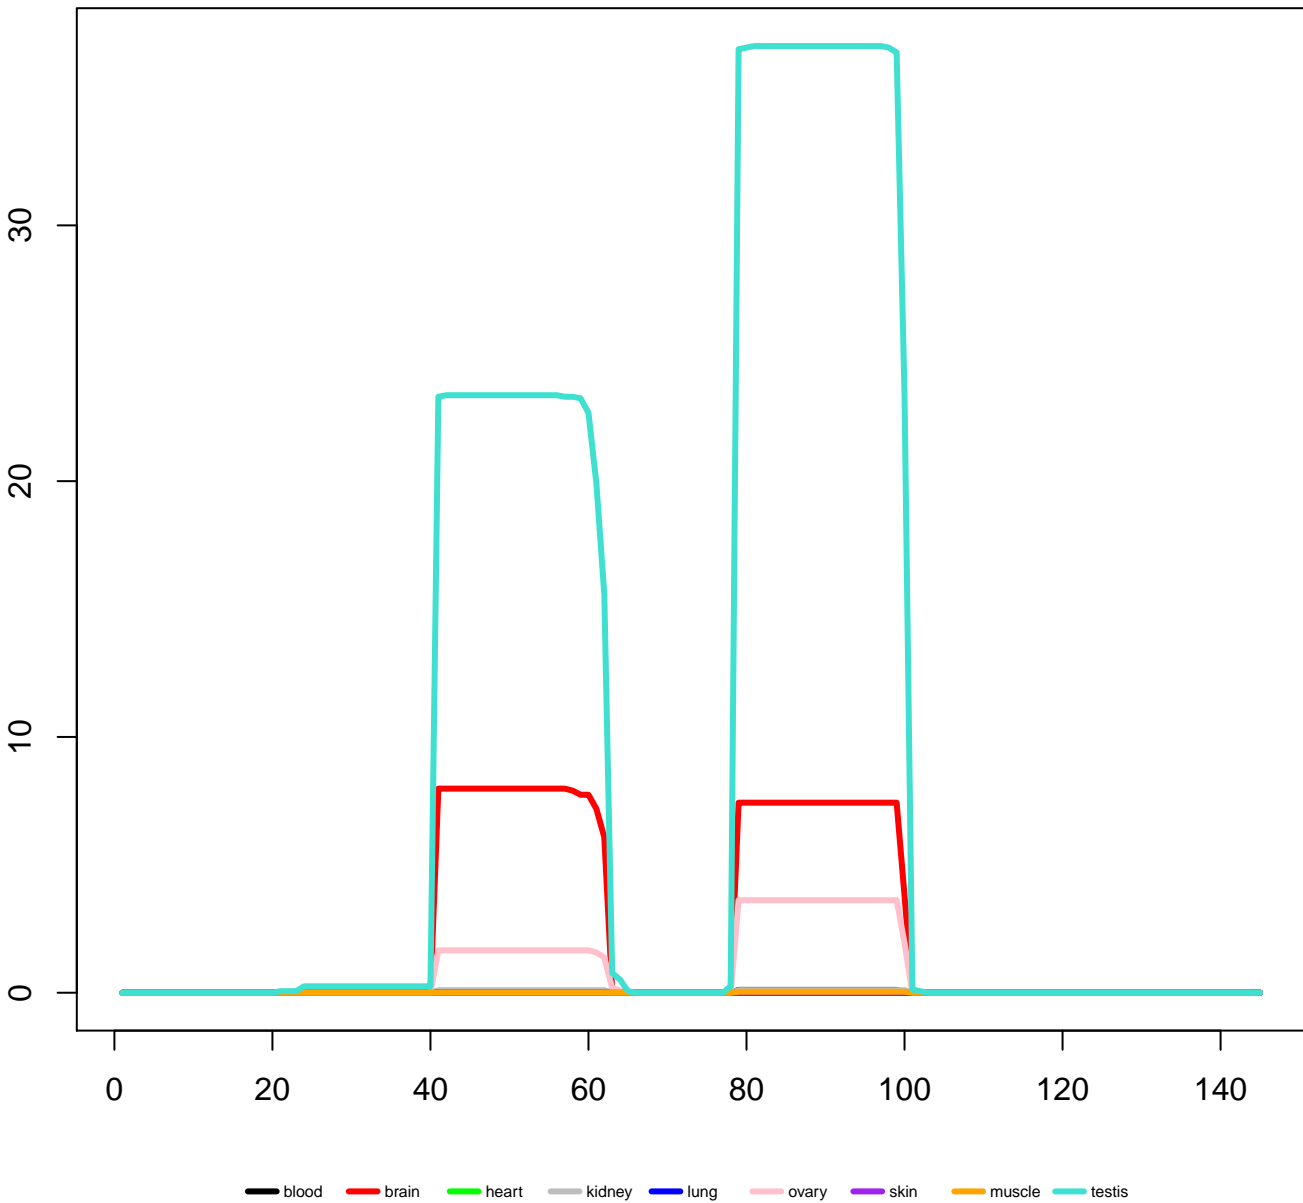



# X\_114686137-114686259(-)\_cfa-mir-8908d-3\_high

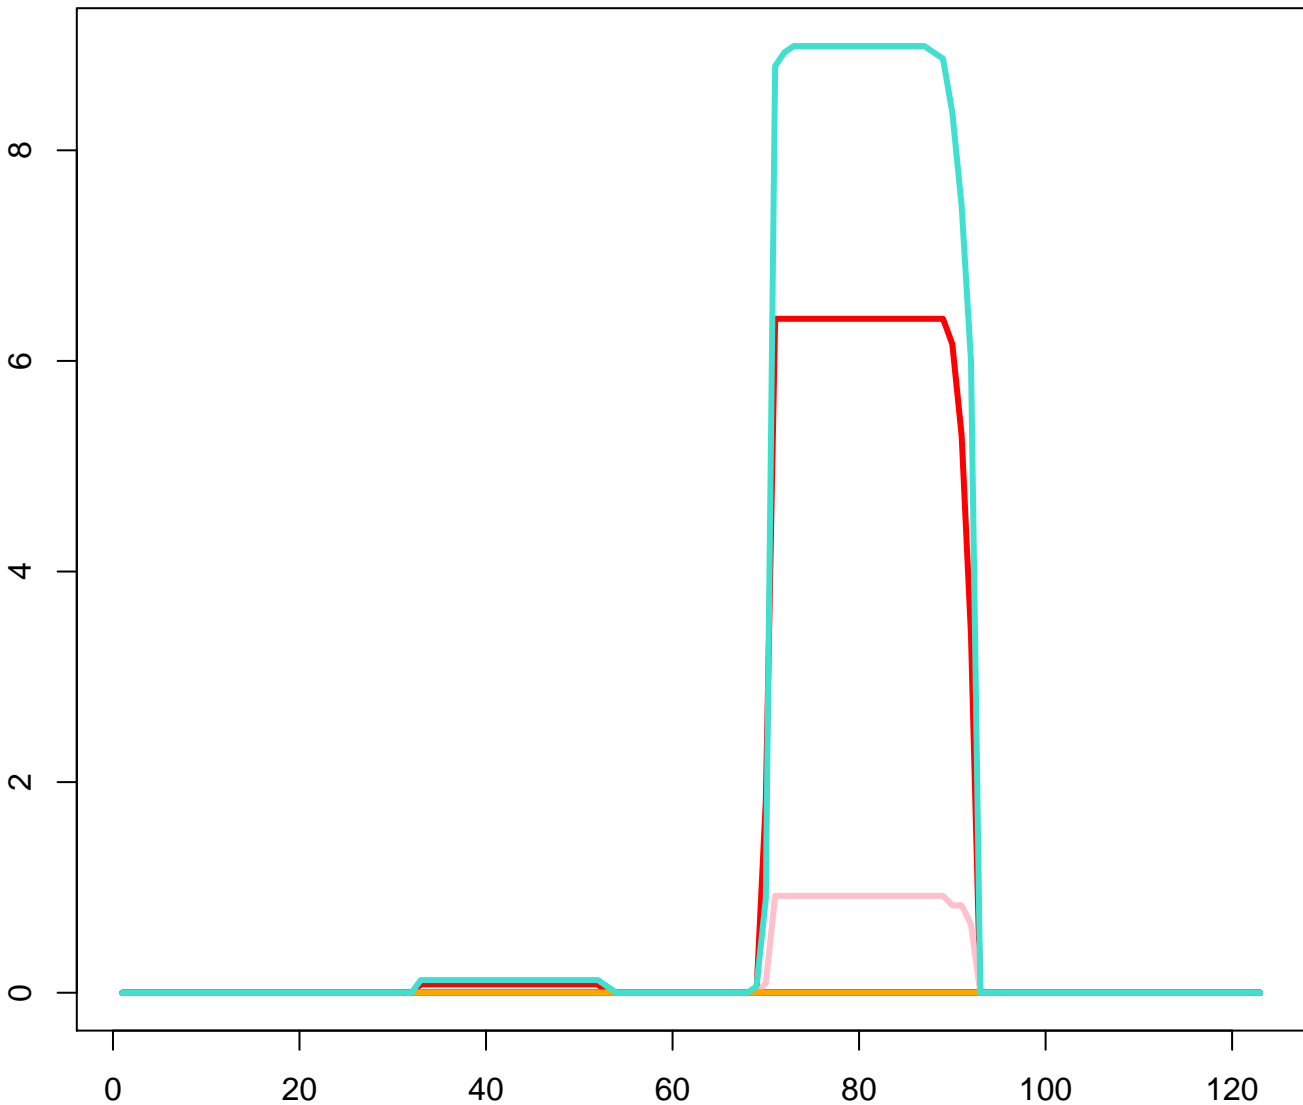

— blood — brain — heart — kidney — lung — ovary — skin — muscle — testis



# X\_114688835-114688977(-)\_cfa-mir-8908d-1\_high

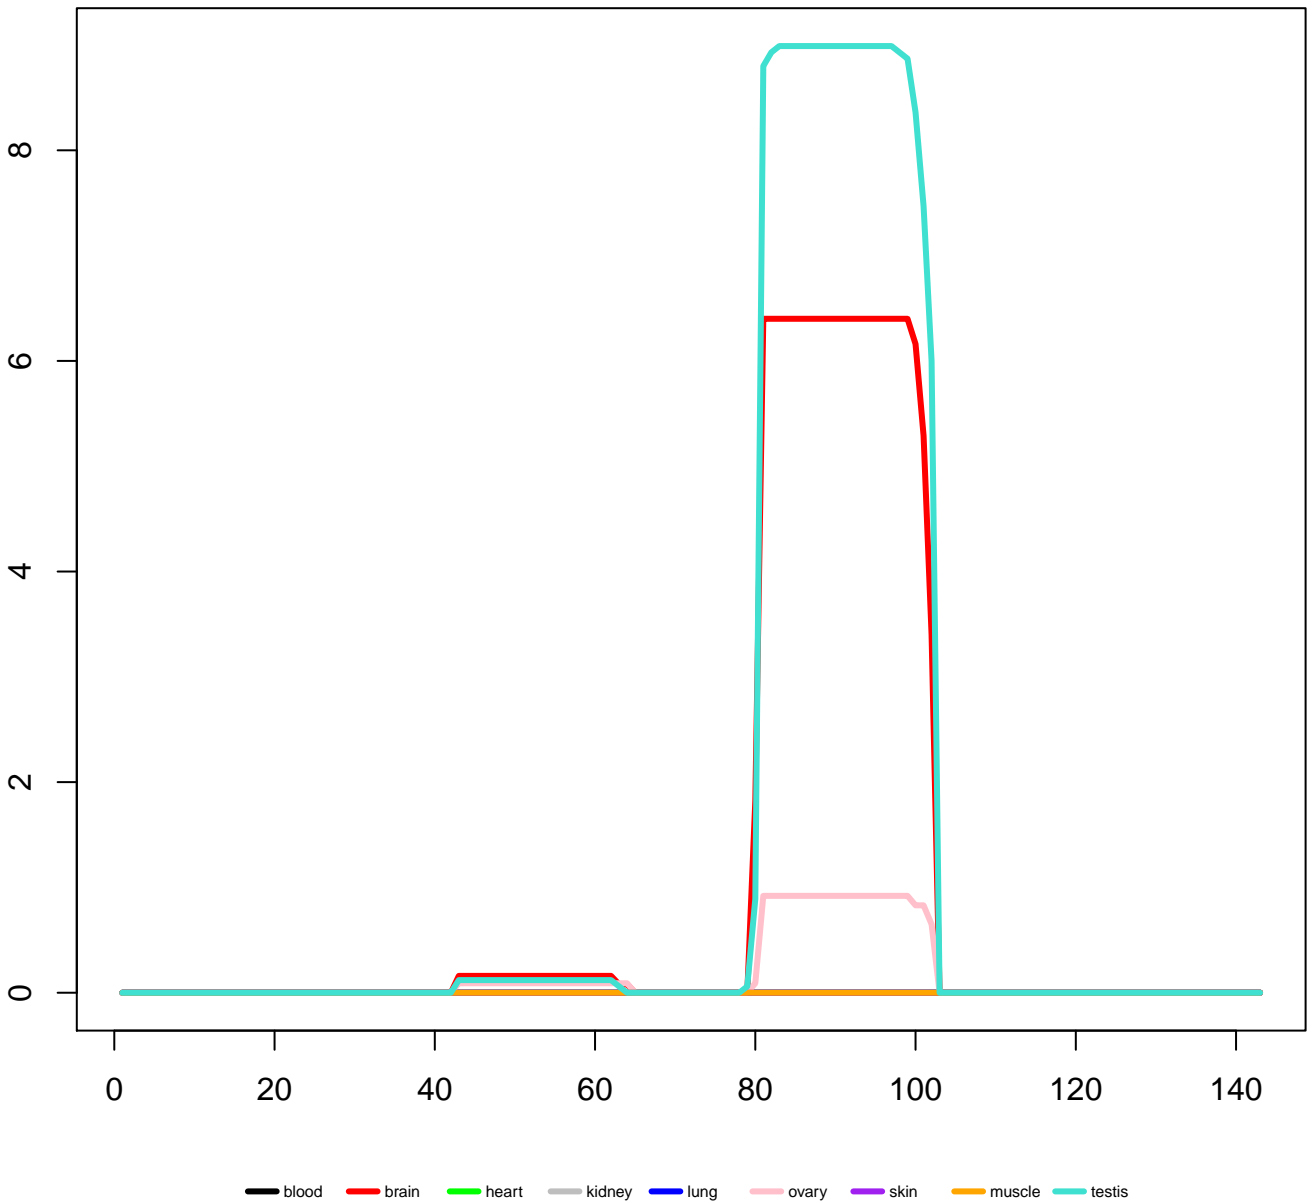





# X\_114717056-114717200(-)\_cfa-mir-8908f\_high

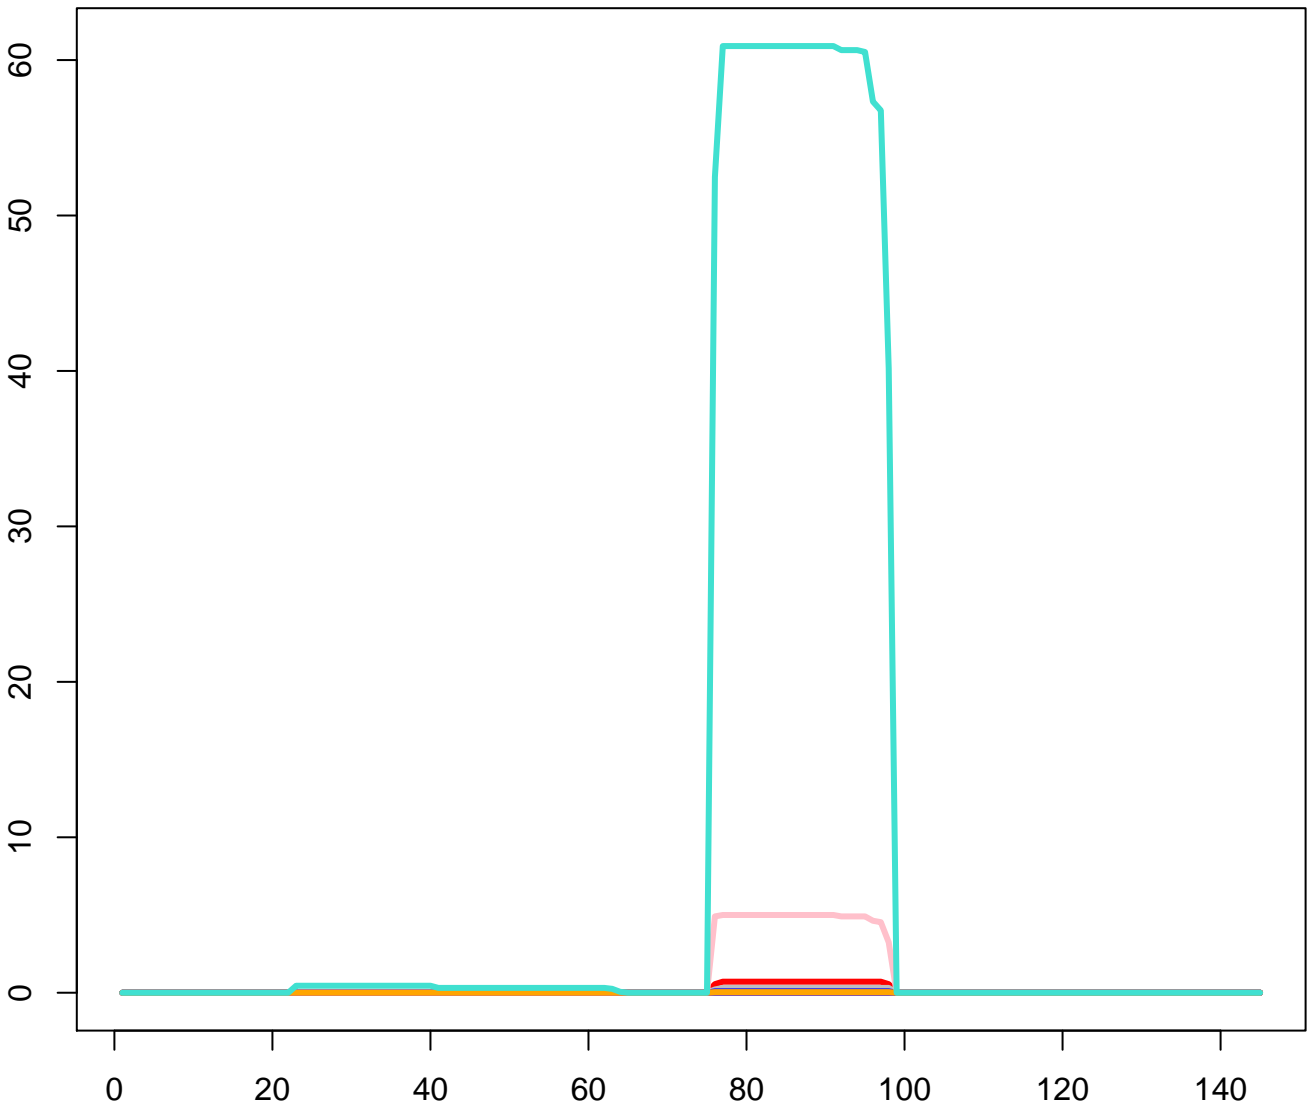

— blood — brain — heart — kidney — lung — ovary — skin — muscle — testis



# X\_115652681-115652825(-)\_cfa-mir-507a\_high

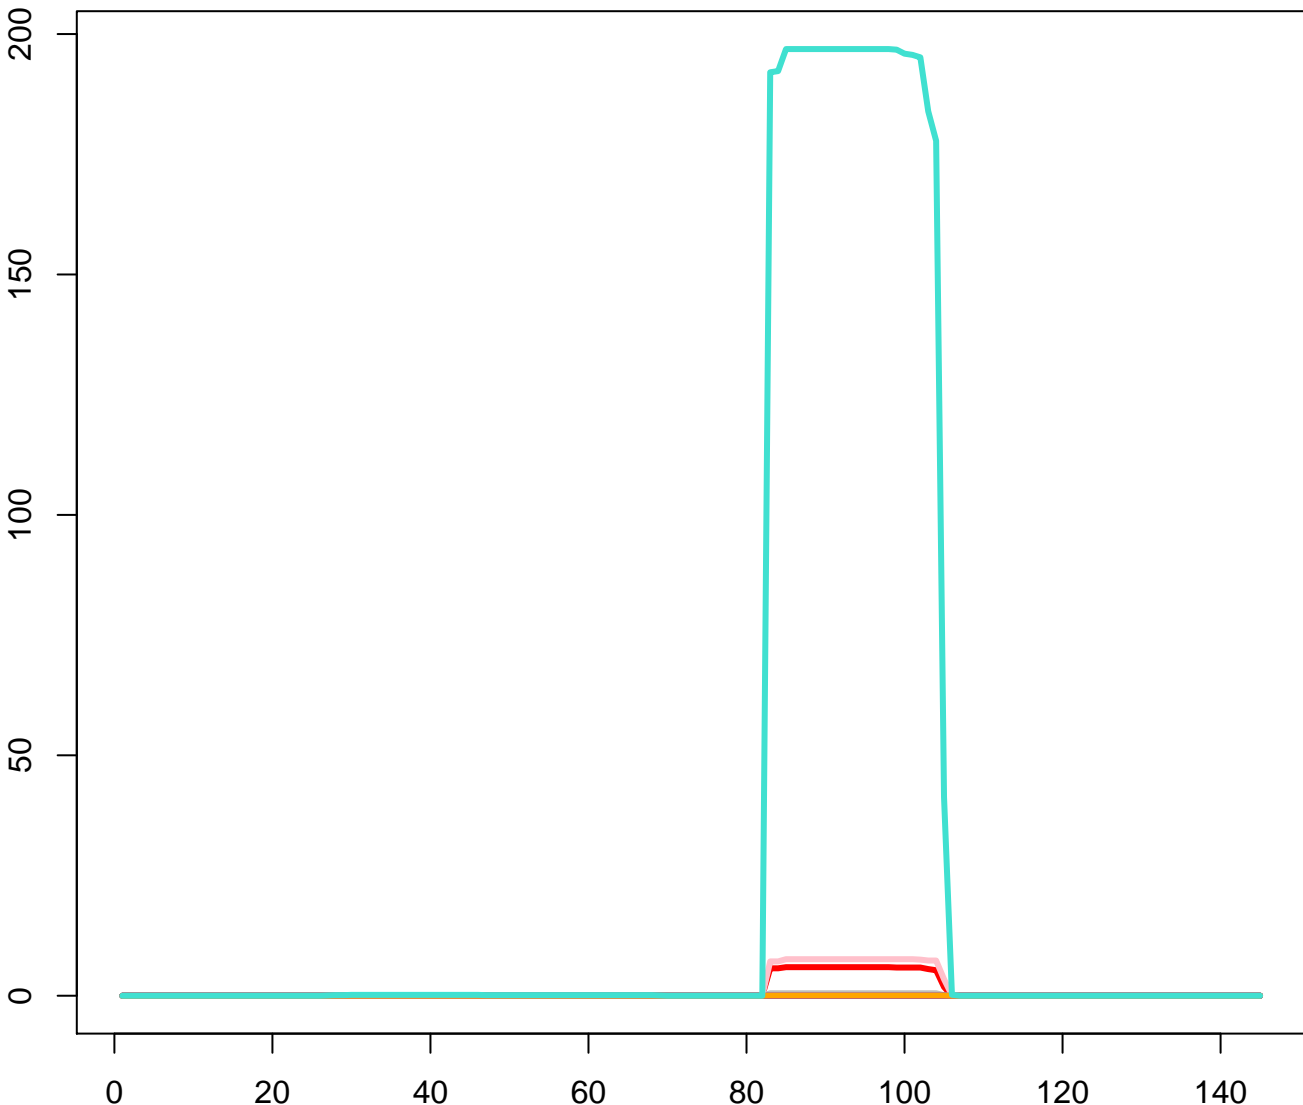

— blood — brain — heart — kidney — lung — ovary — skin — muscle — testis





# X\_115665368-115665474(-)\_cfa-mir-507b\_high

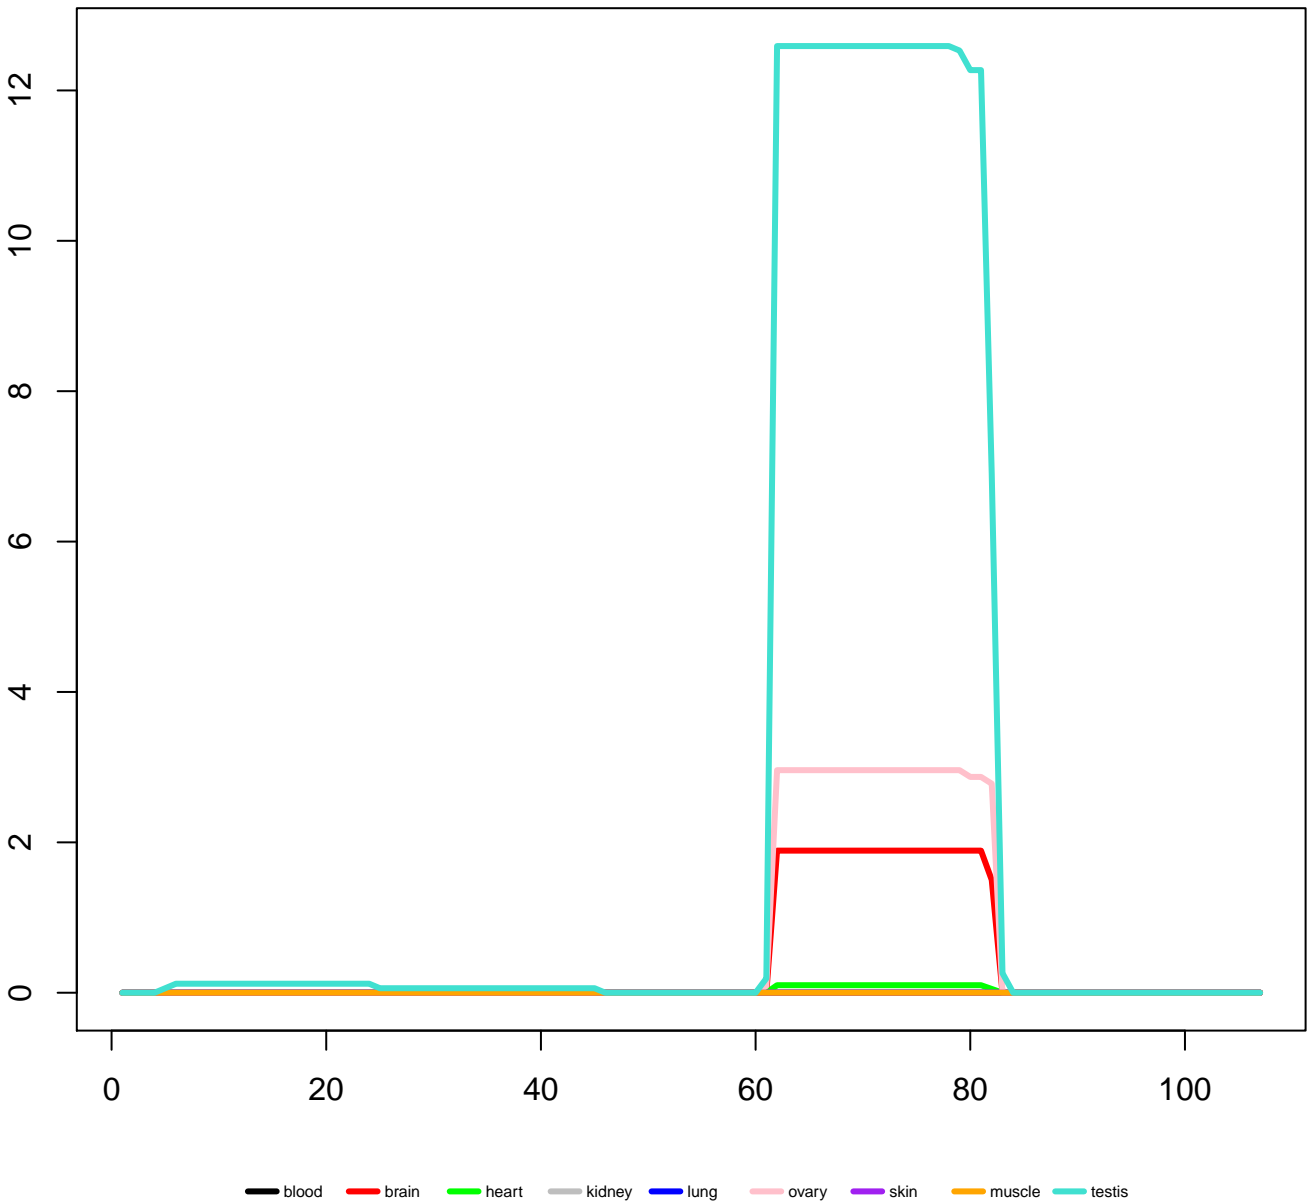

# X\_115674734-115674823(-)\_mir-514\_low



— blood — brain — heart — kidney — lung — ovary — skin — muscle — testis





# X\_118541319-118541461(+)\_cfa-mir-2114\_high

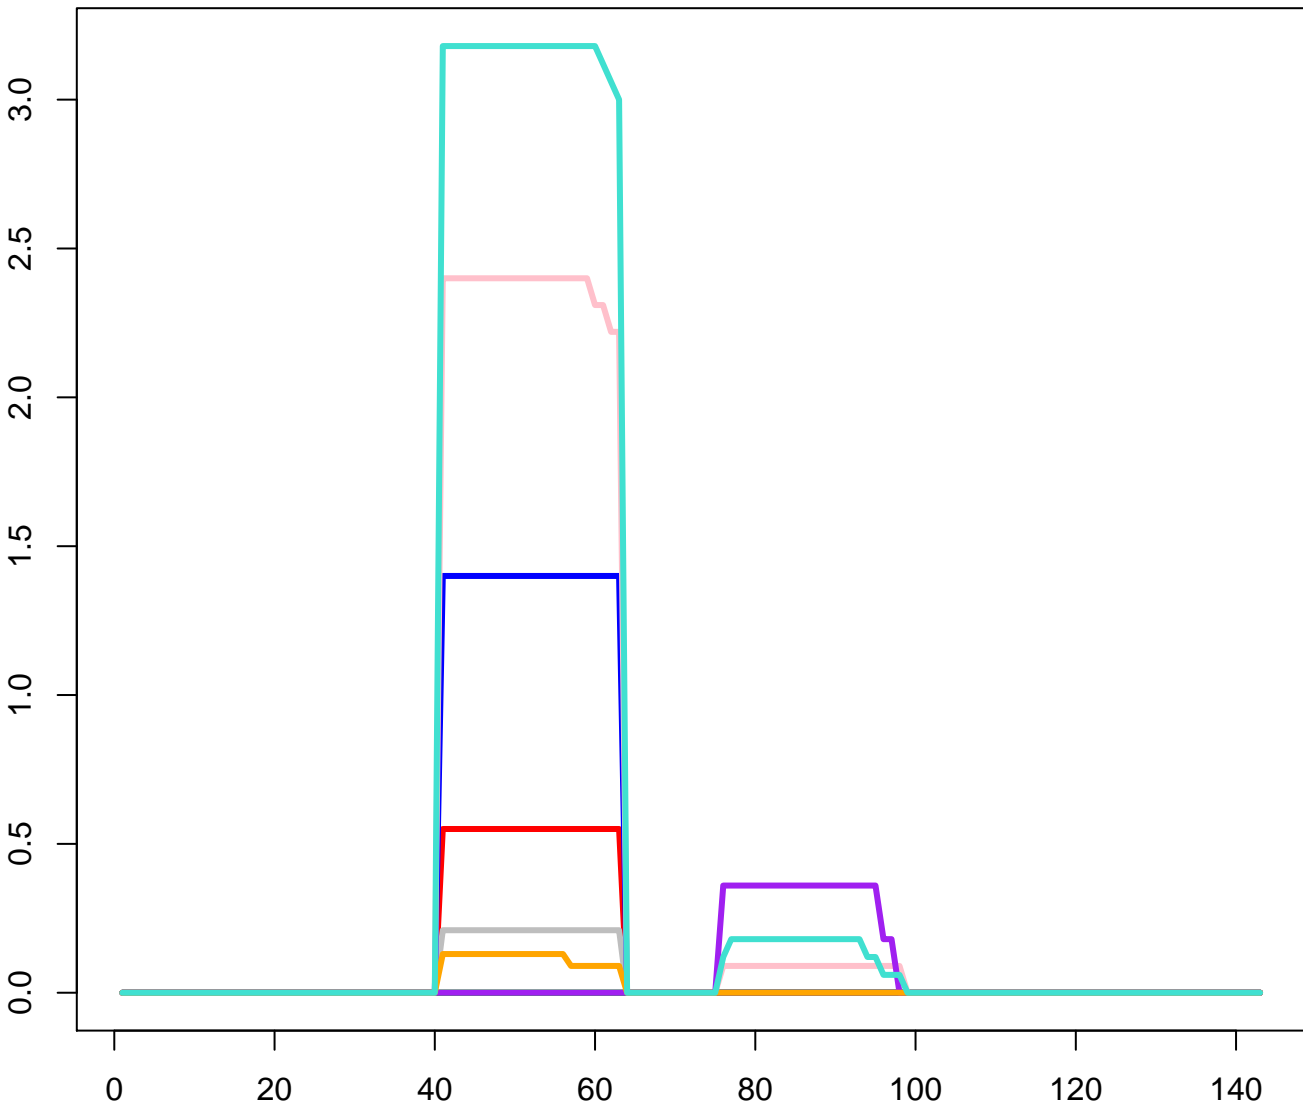

blood brain heart kidney lung ovary skin muscle testis

# X\_119925345-119925413(-)\_cfa-mir-224\_high

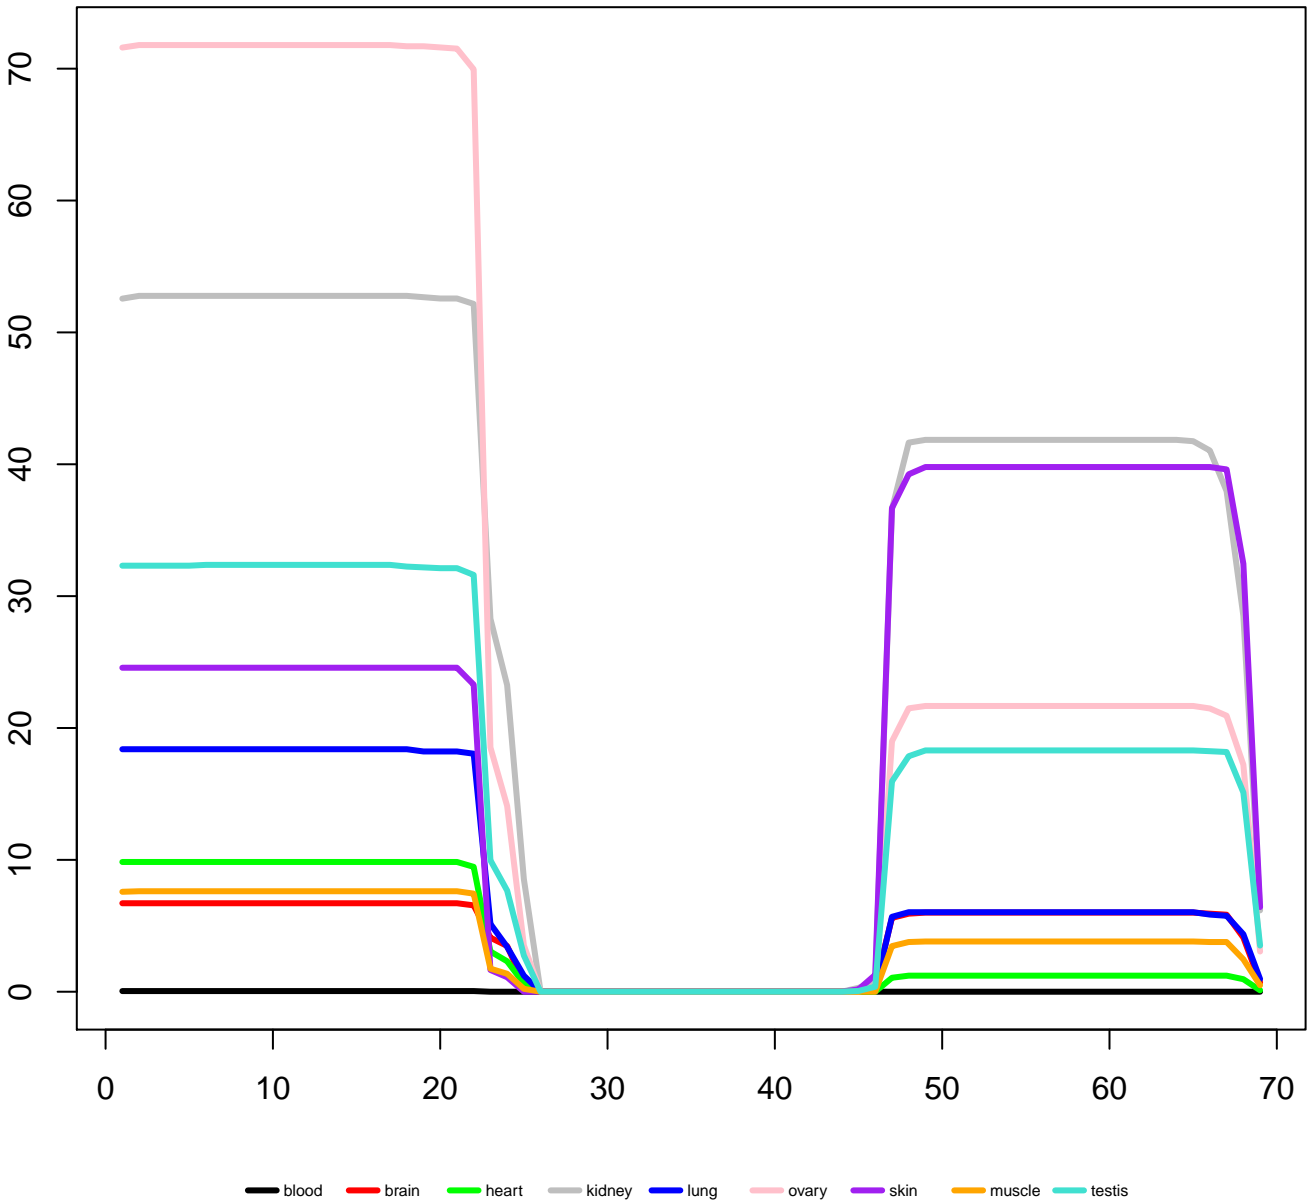

# X\_119926379-119926463(-)\_cfa-mir-452\_high

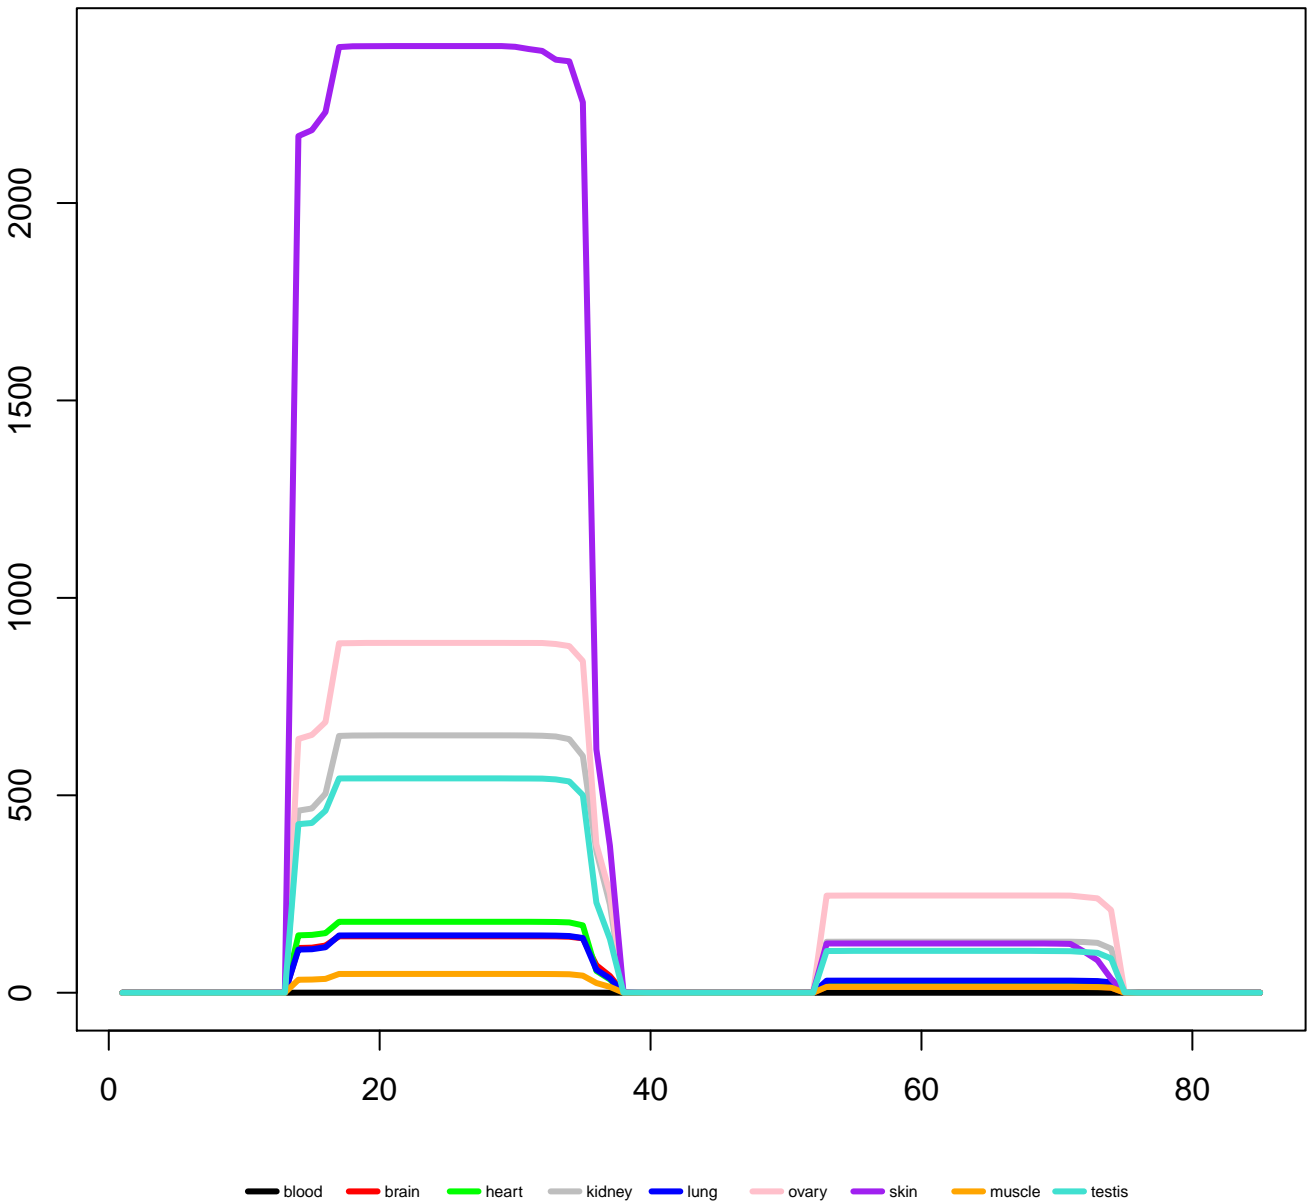



# X\_120405349-120405428(-)\_cfa-mir-105b\_high

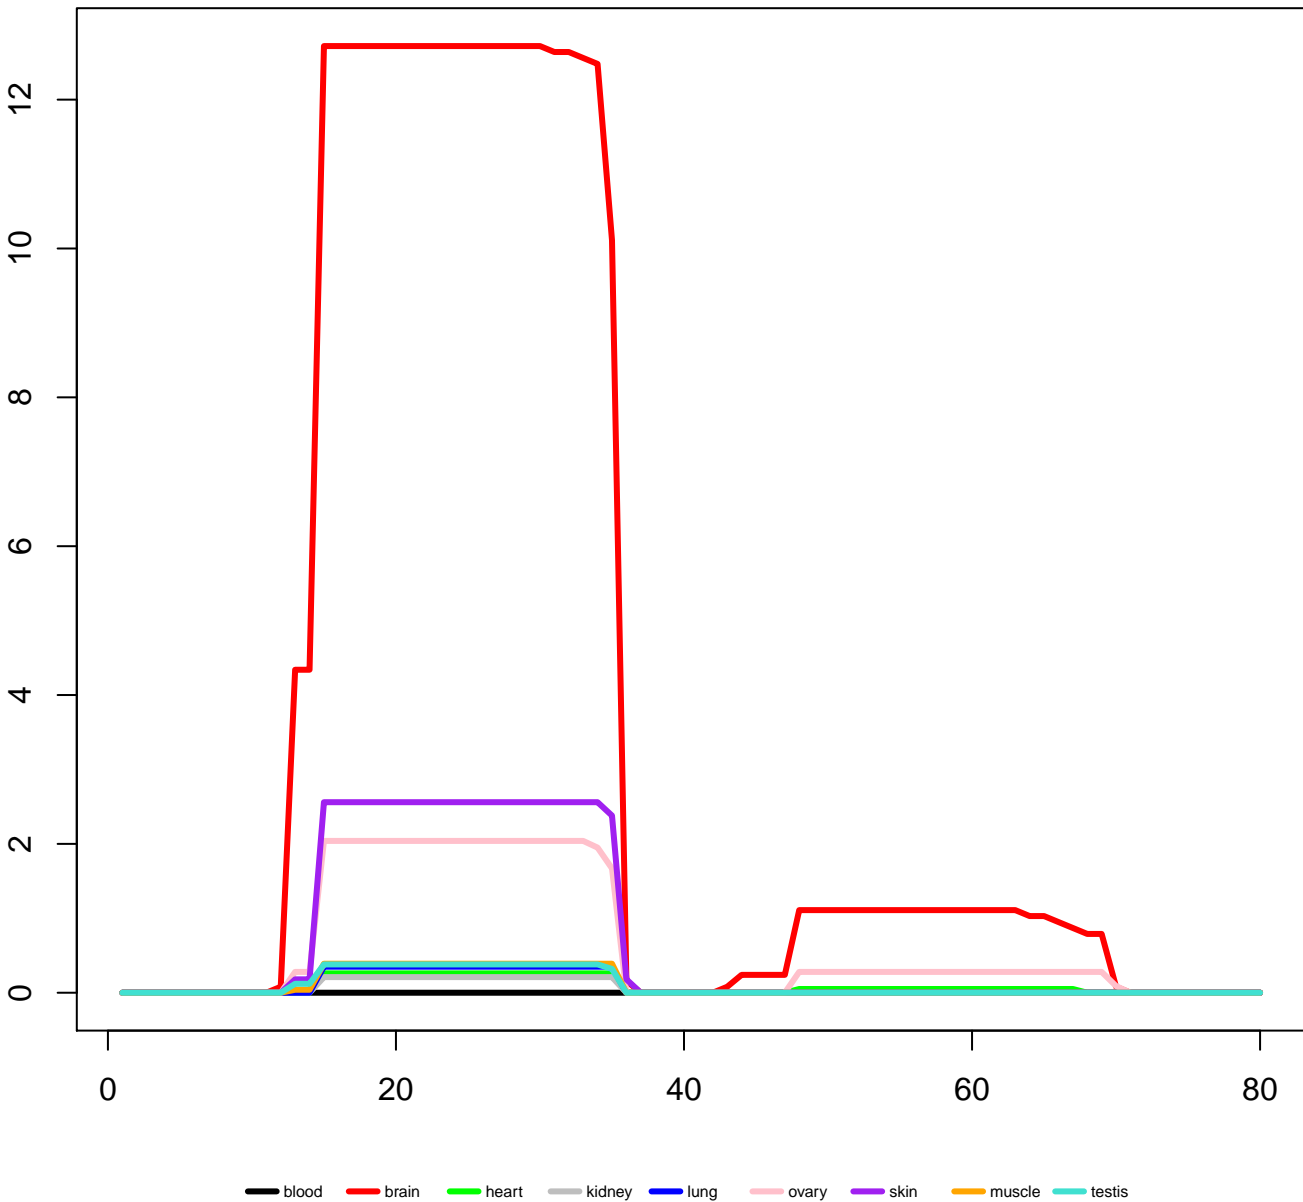

# X\_121862617-121862688(-)\_cfa-mir-718\_low

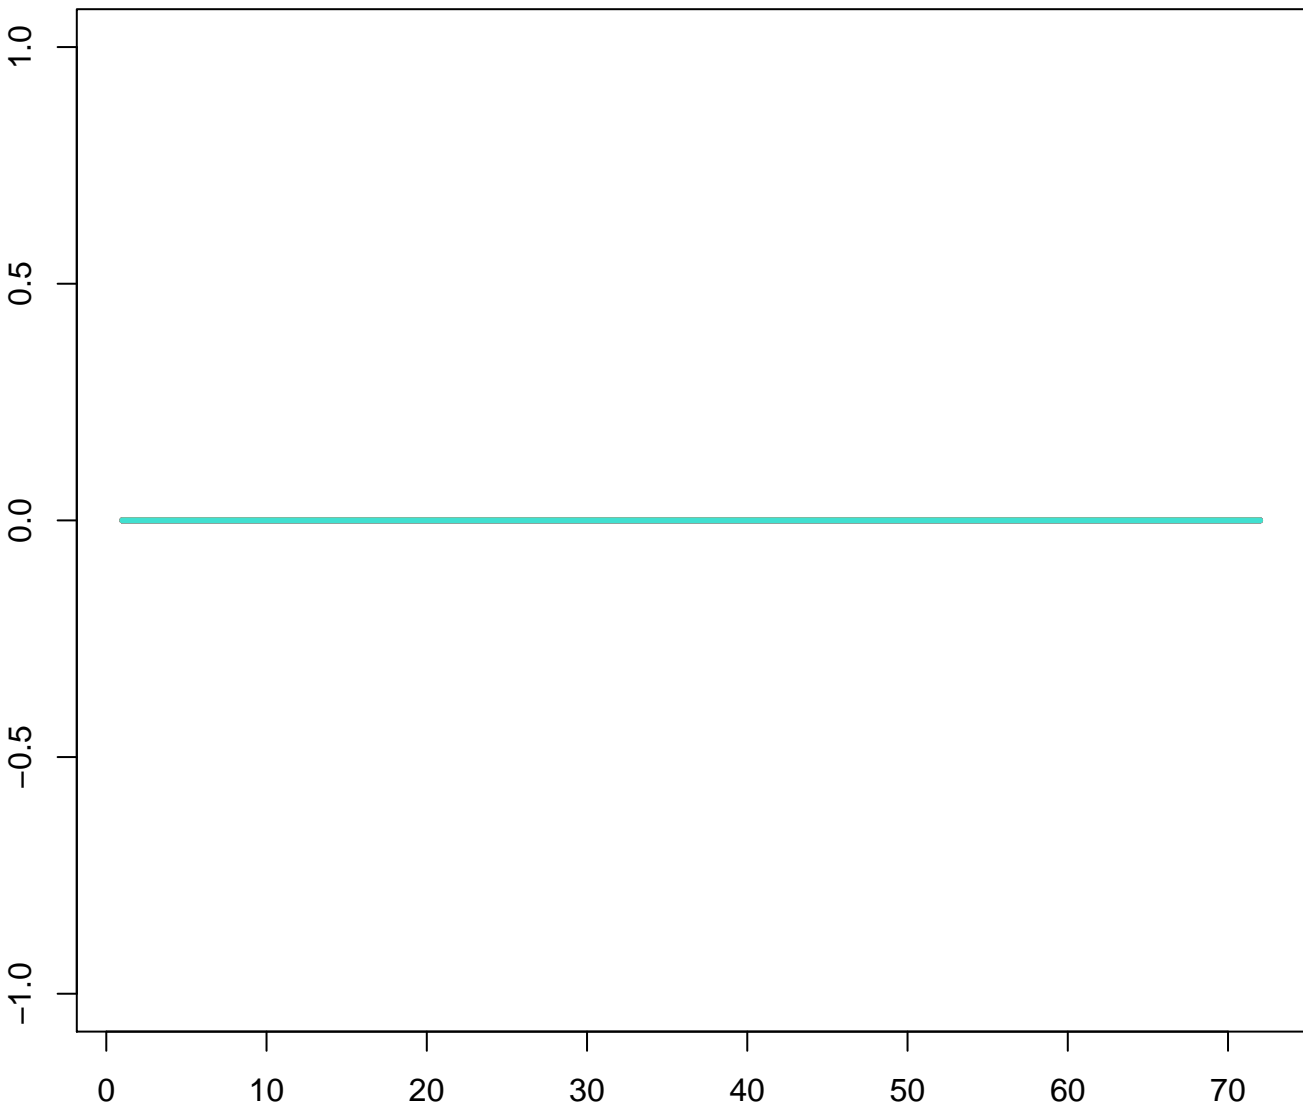

blood brain heart kidney lung ovary skin muscle testis

# 12\_33290936-33291015(+)\_mir-684\_low

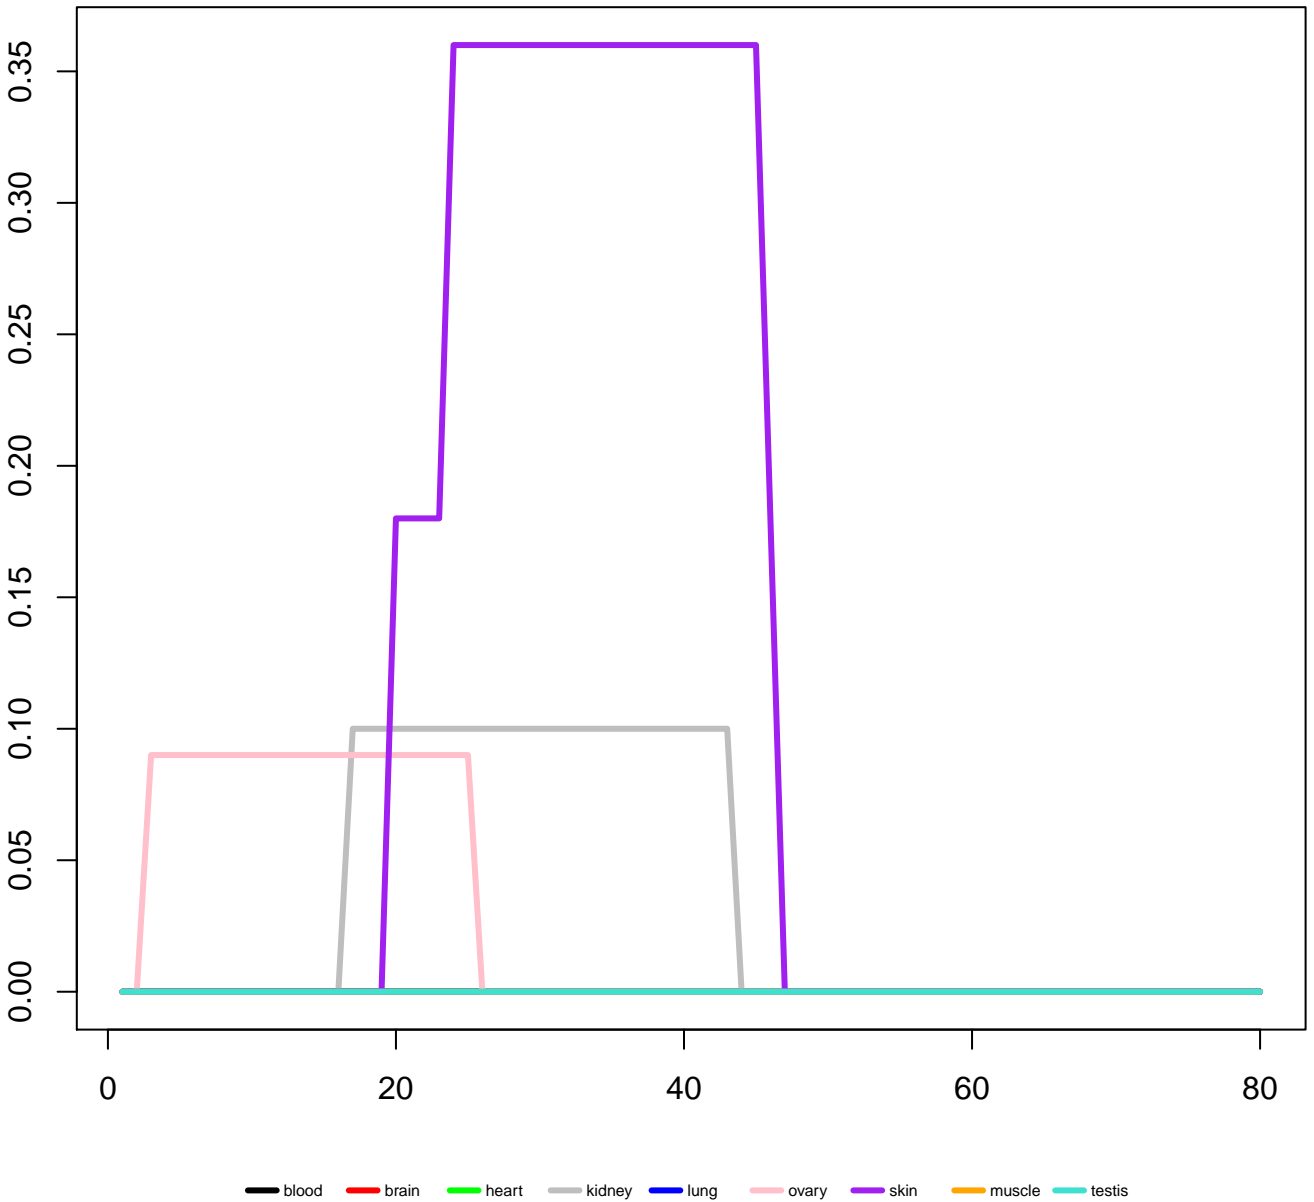



# 16\_4113941-4114030(-)\_mir-684\_low

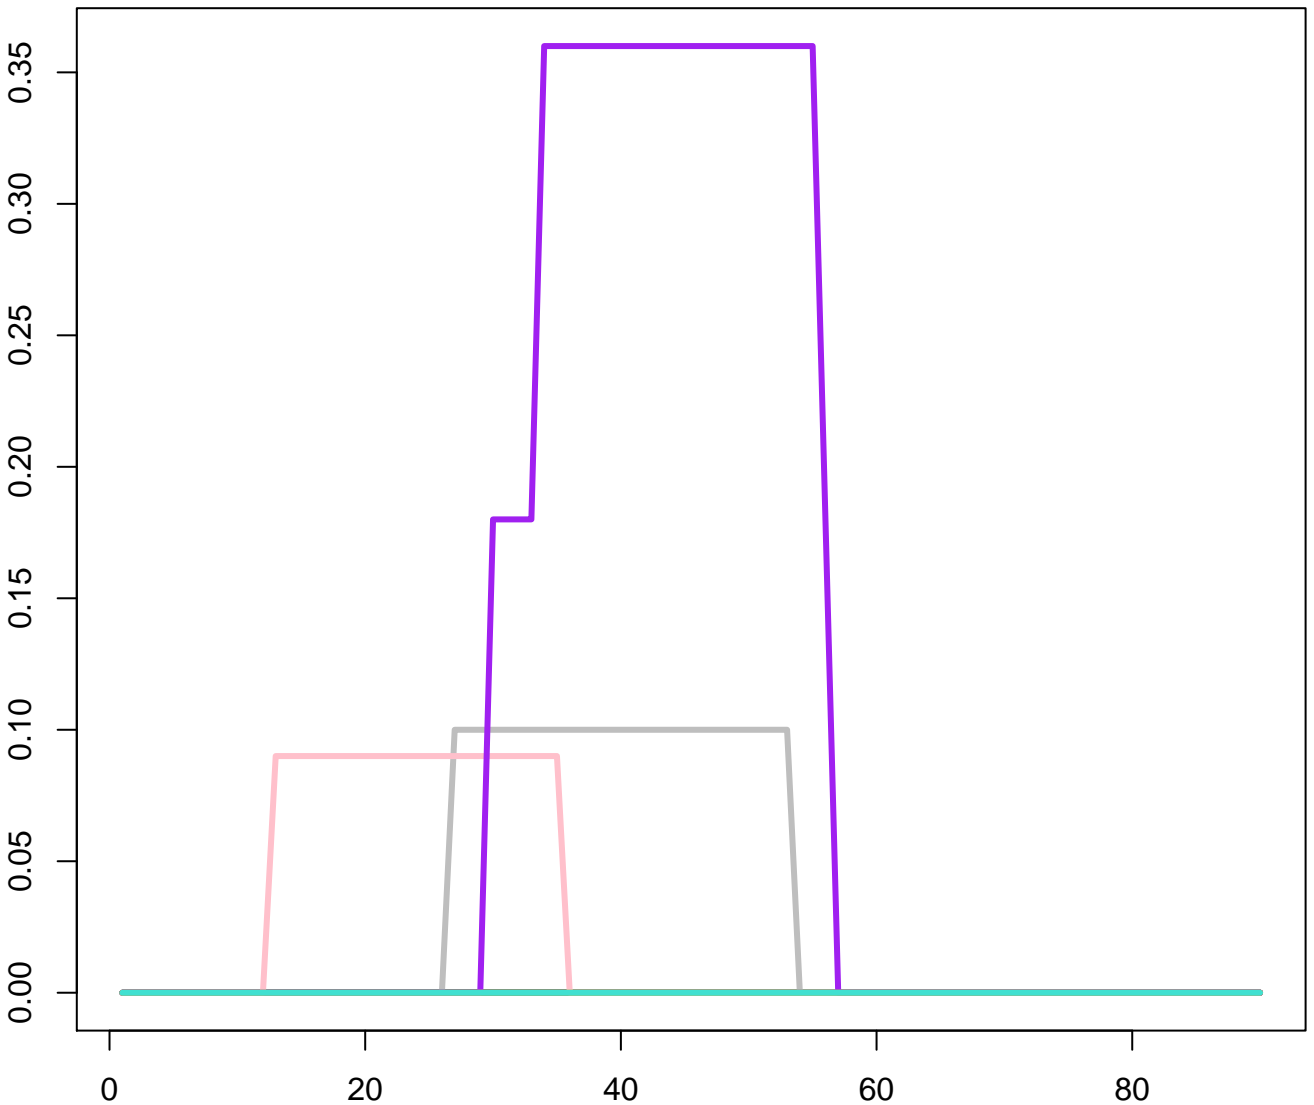

— blood — brain — heart — kidney — lung — ovary — skin — muscle — testis

# 31\_28082610-28082693(+)\_mir-684\_low

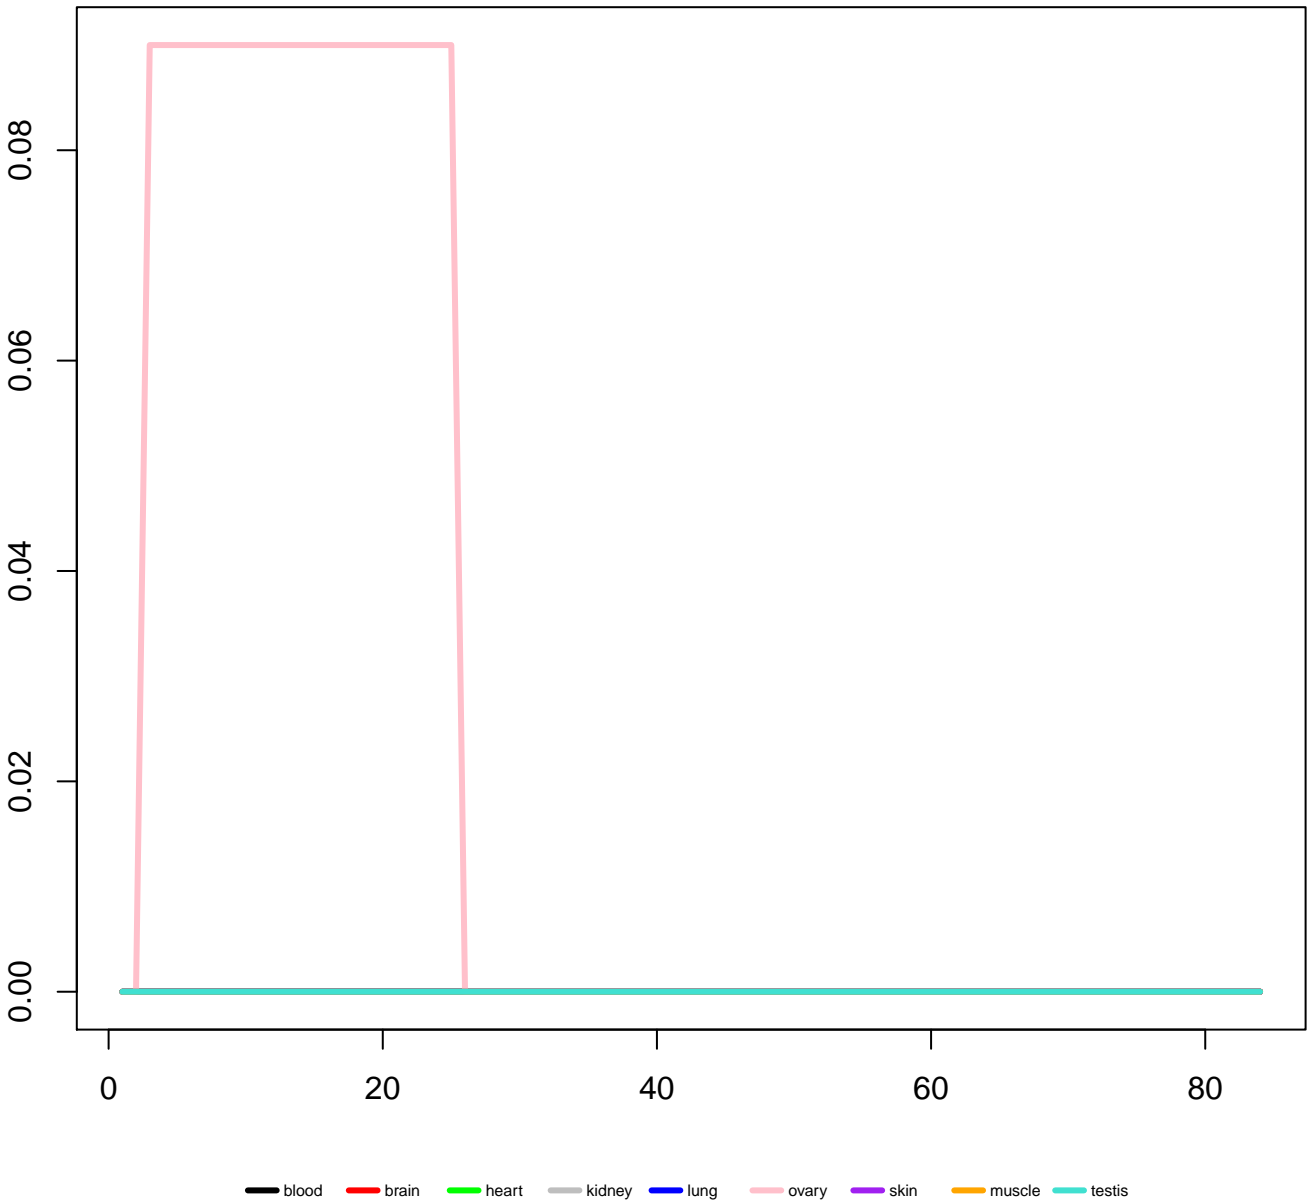

# 31\_28981557-28981640(+)\_mir-684\_low

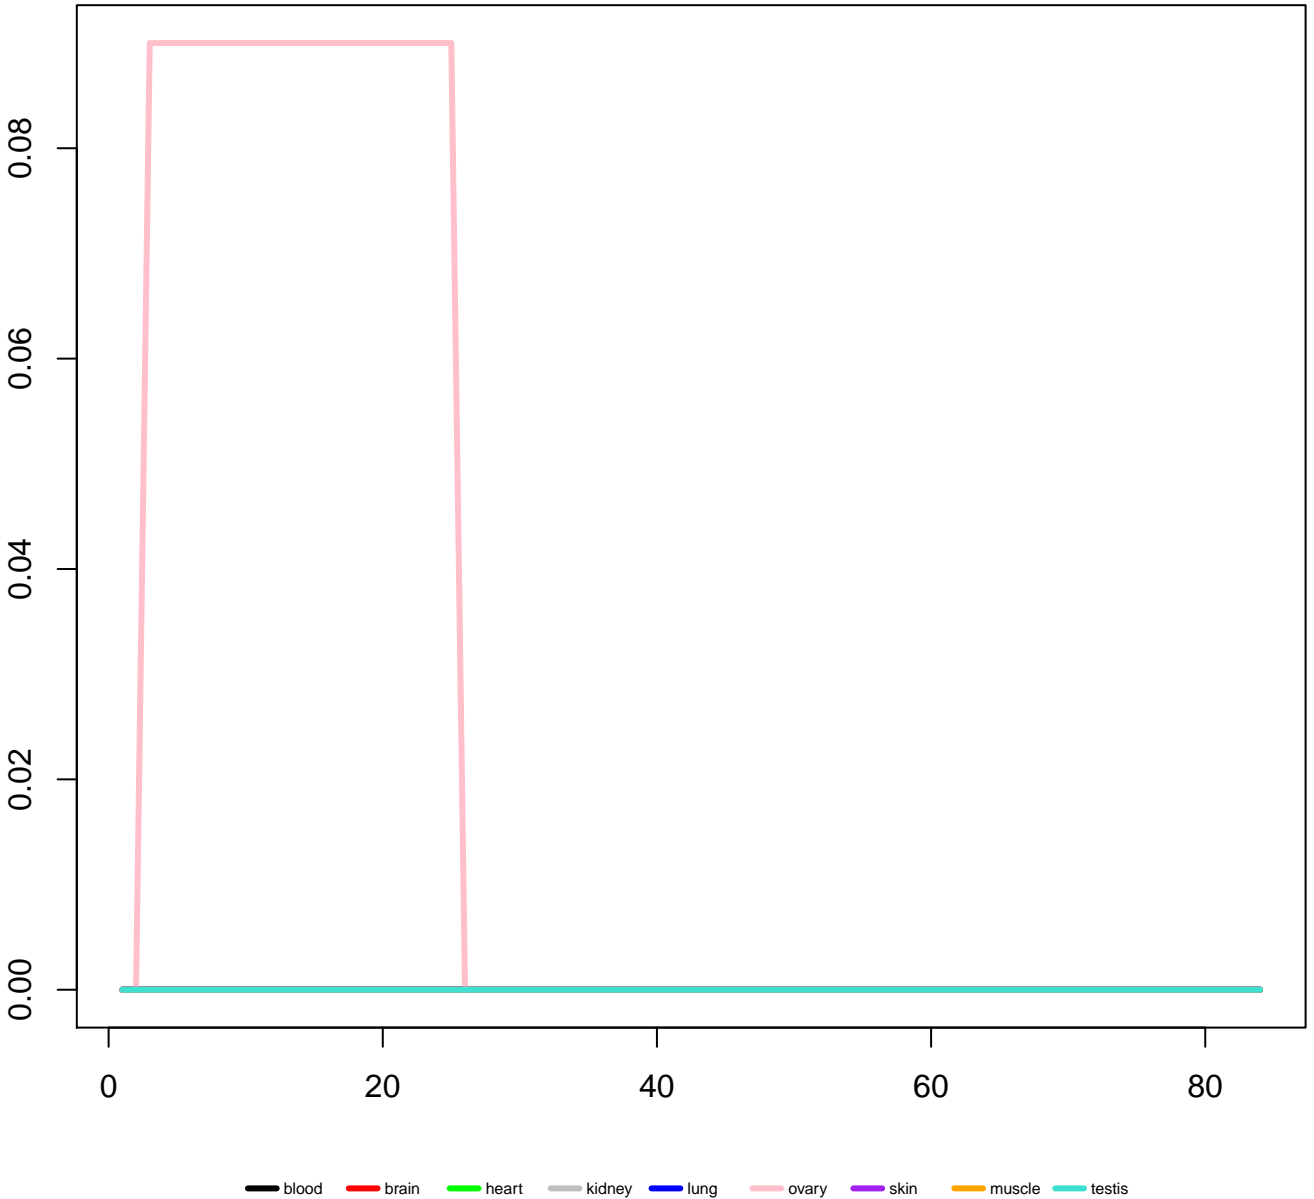

# 32\_5648665-5648745(+)\_mir-682\_low

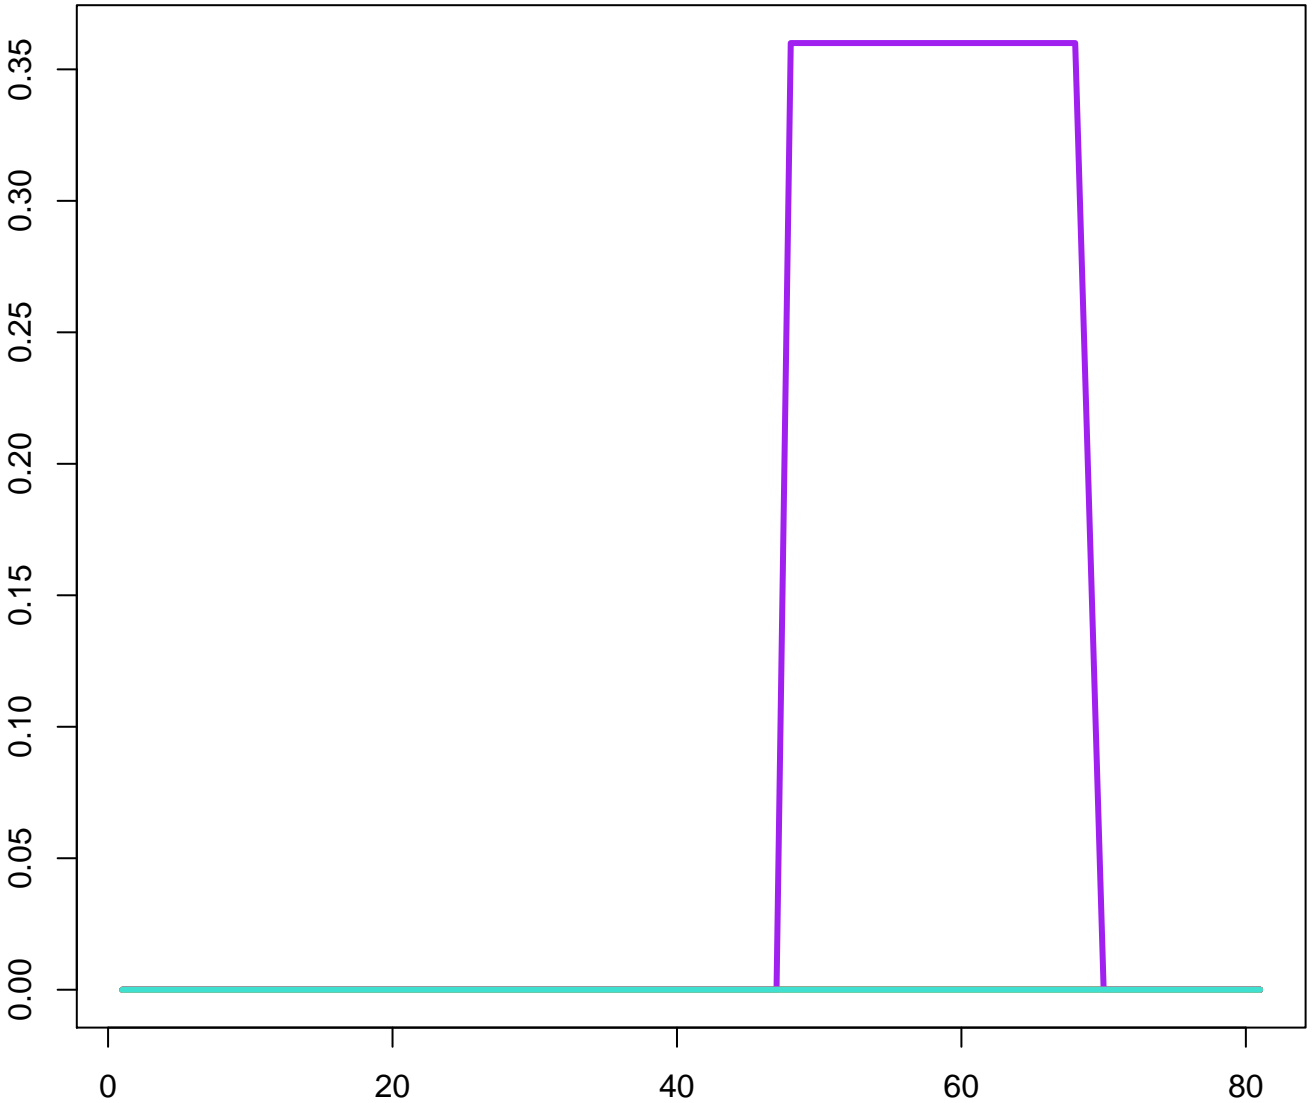

blood brain heart kidney lung ovary skin muscle testis

# 35\_24800423-24800527(+)\_mir-9277\_low

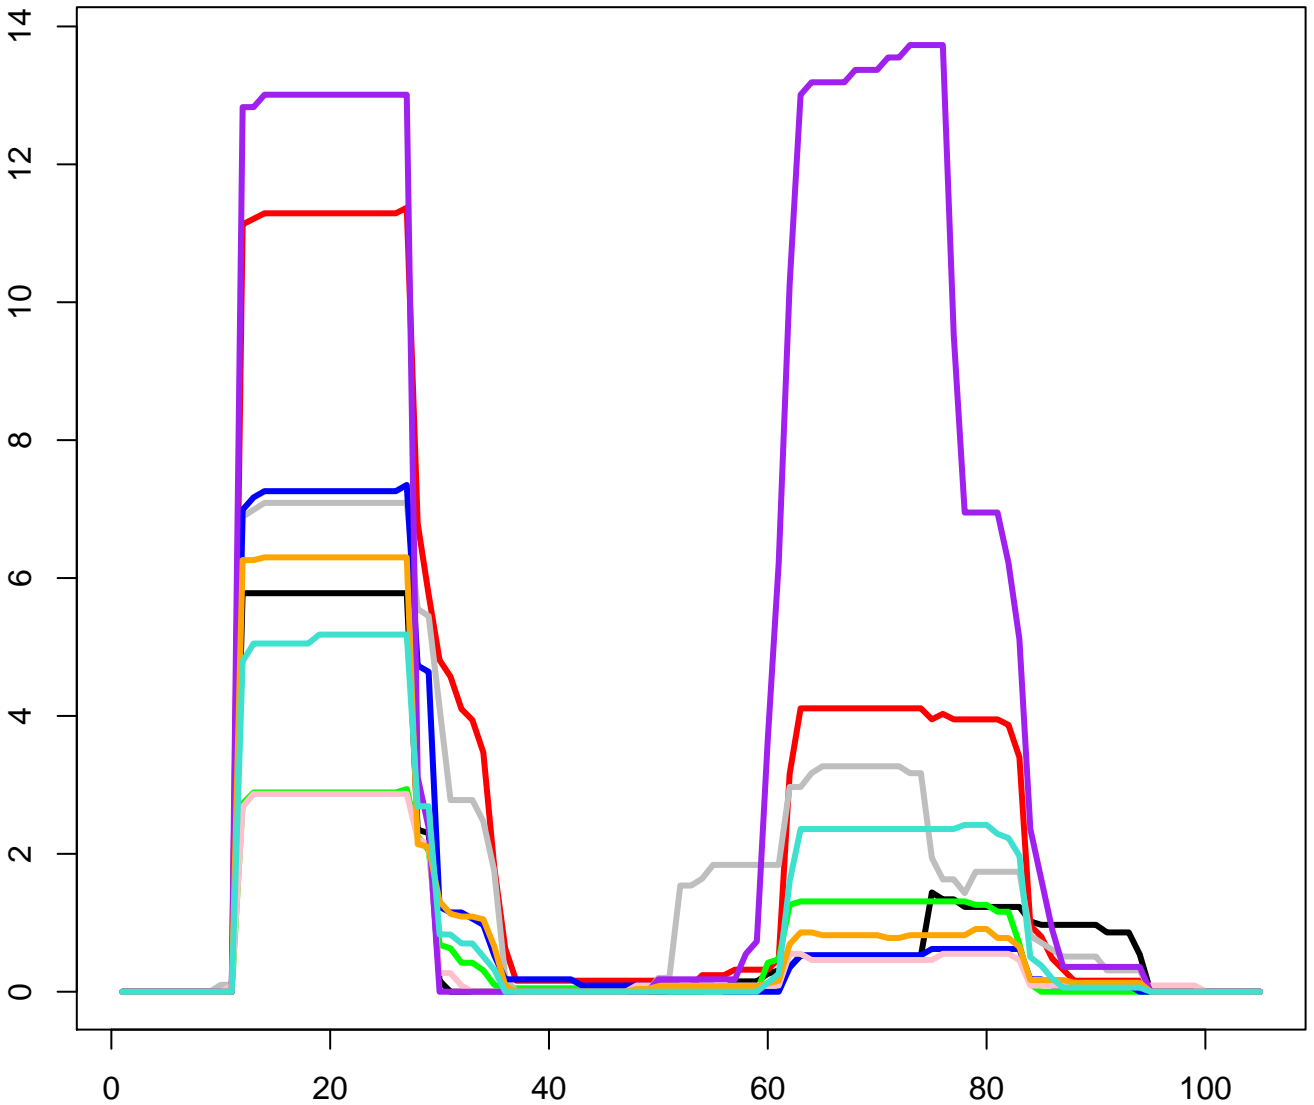

— blood — brain — heart — kidney — lung — ovary — skin — muscle — testis

# 35\_24816215-24816339(+)\_mir-9277\_low

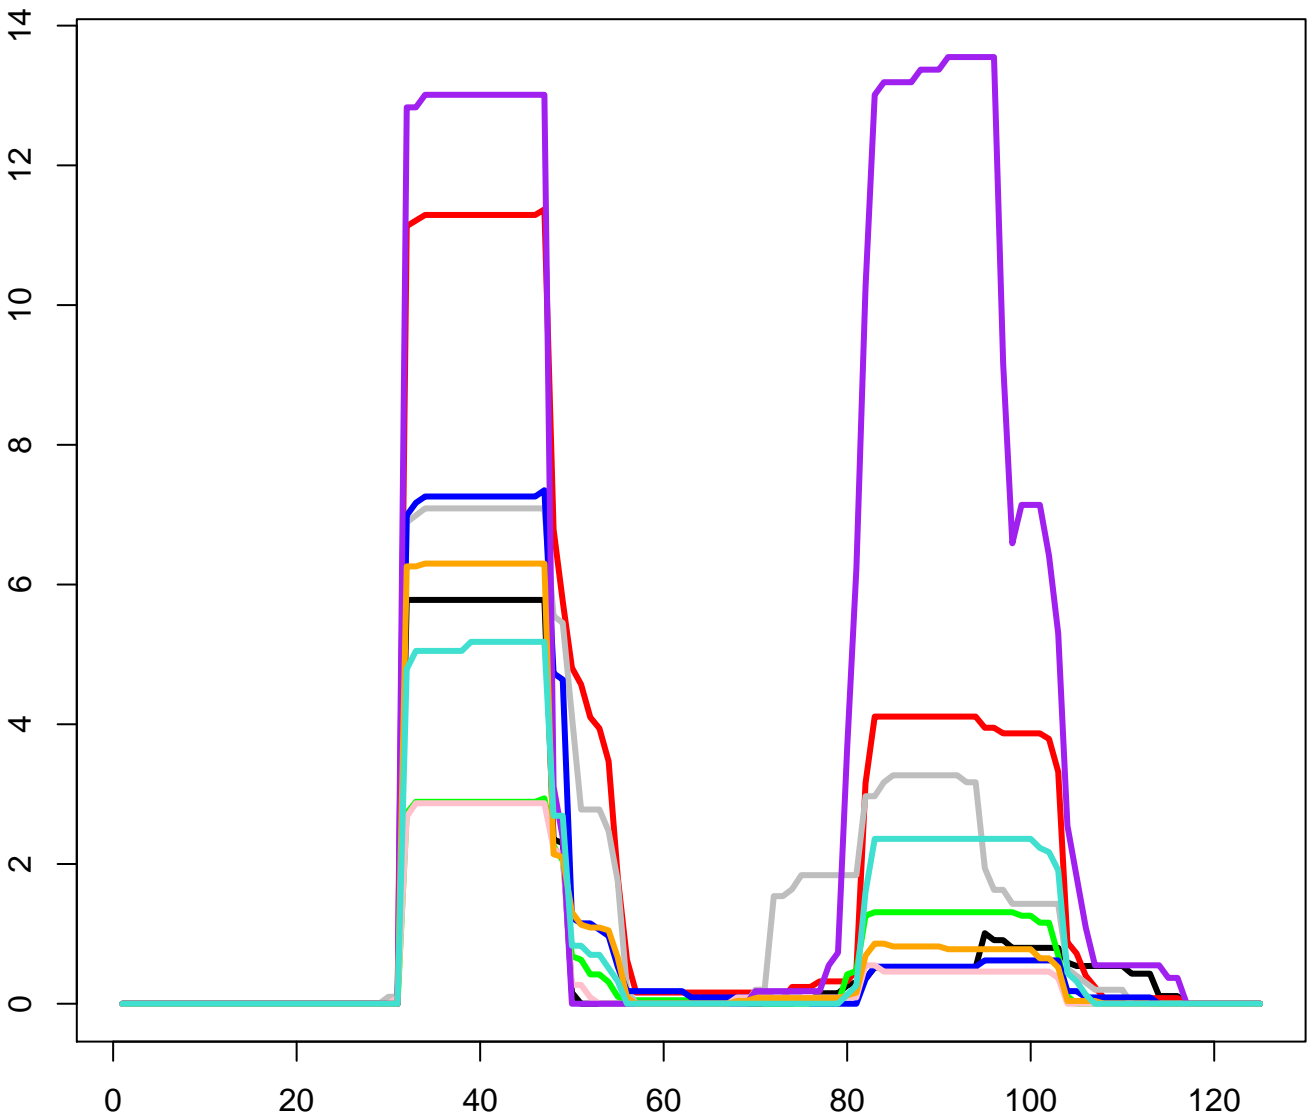

— blood — brain — heart — kidney — lung — ovary — skin — muscle — testis
