# Supplementary material for: An Improved microRNA Annotation of the Canine Genome
Source: PubMed Central journal article supplement (PMC4847789; doi:10.1371/journal.pone.0153453), 2016-04-27

# Proportion of 5' reads – Blood

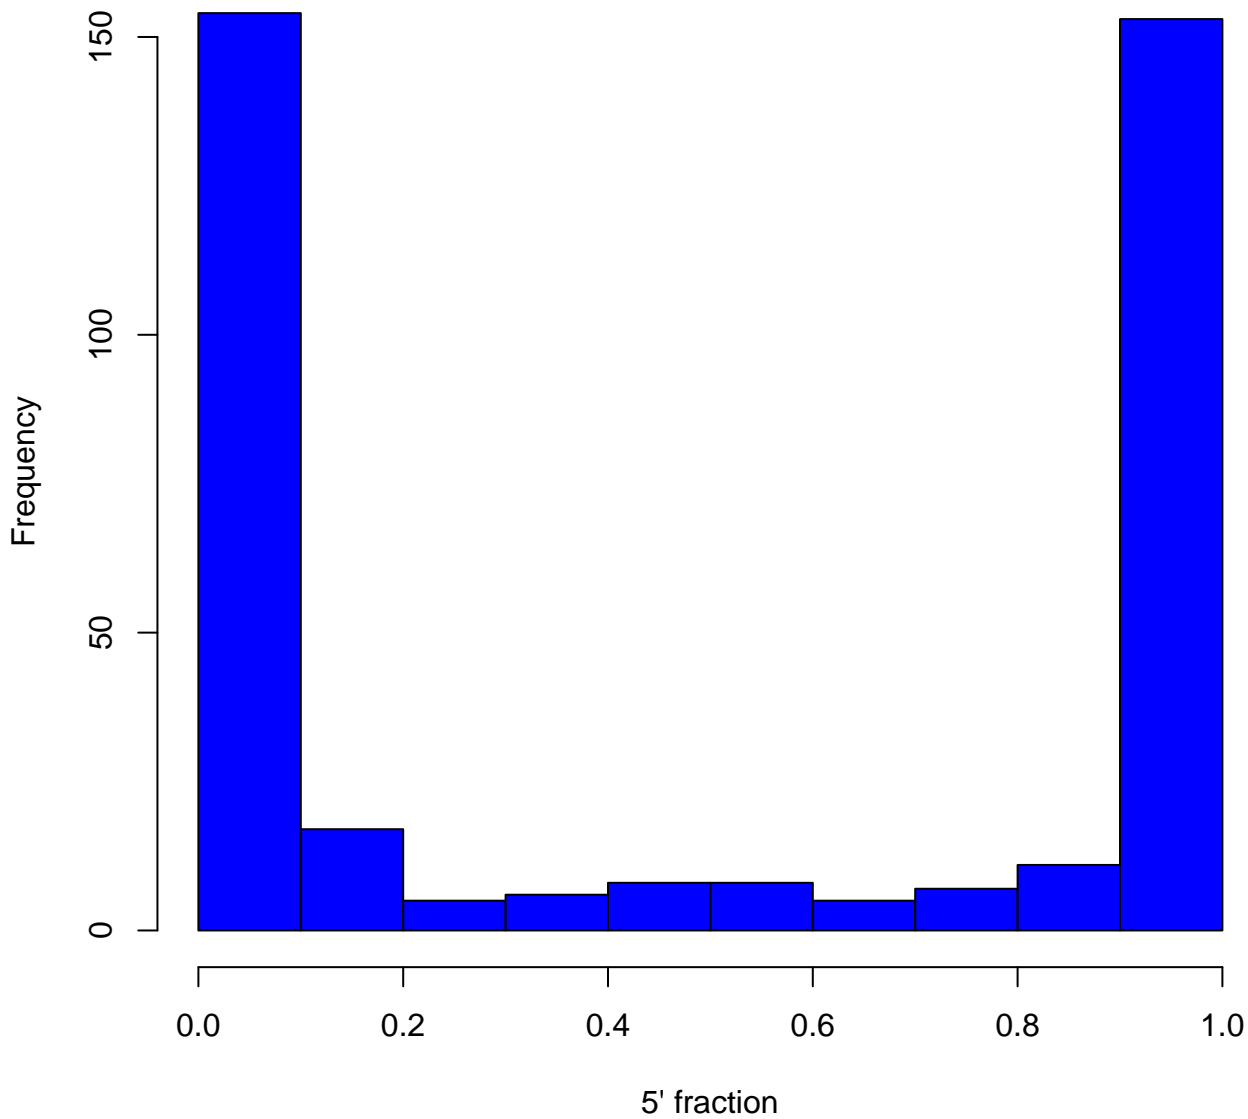

# Proportion of 5' reads – Brain

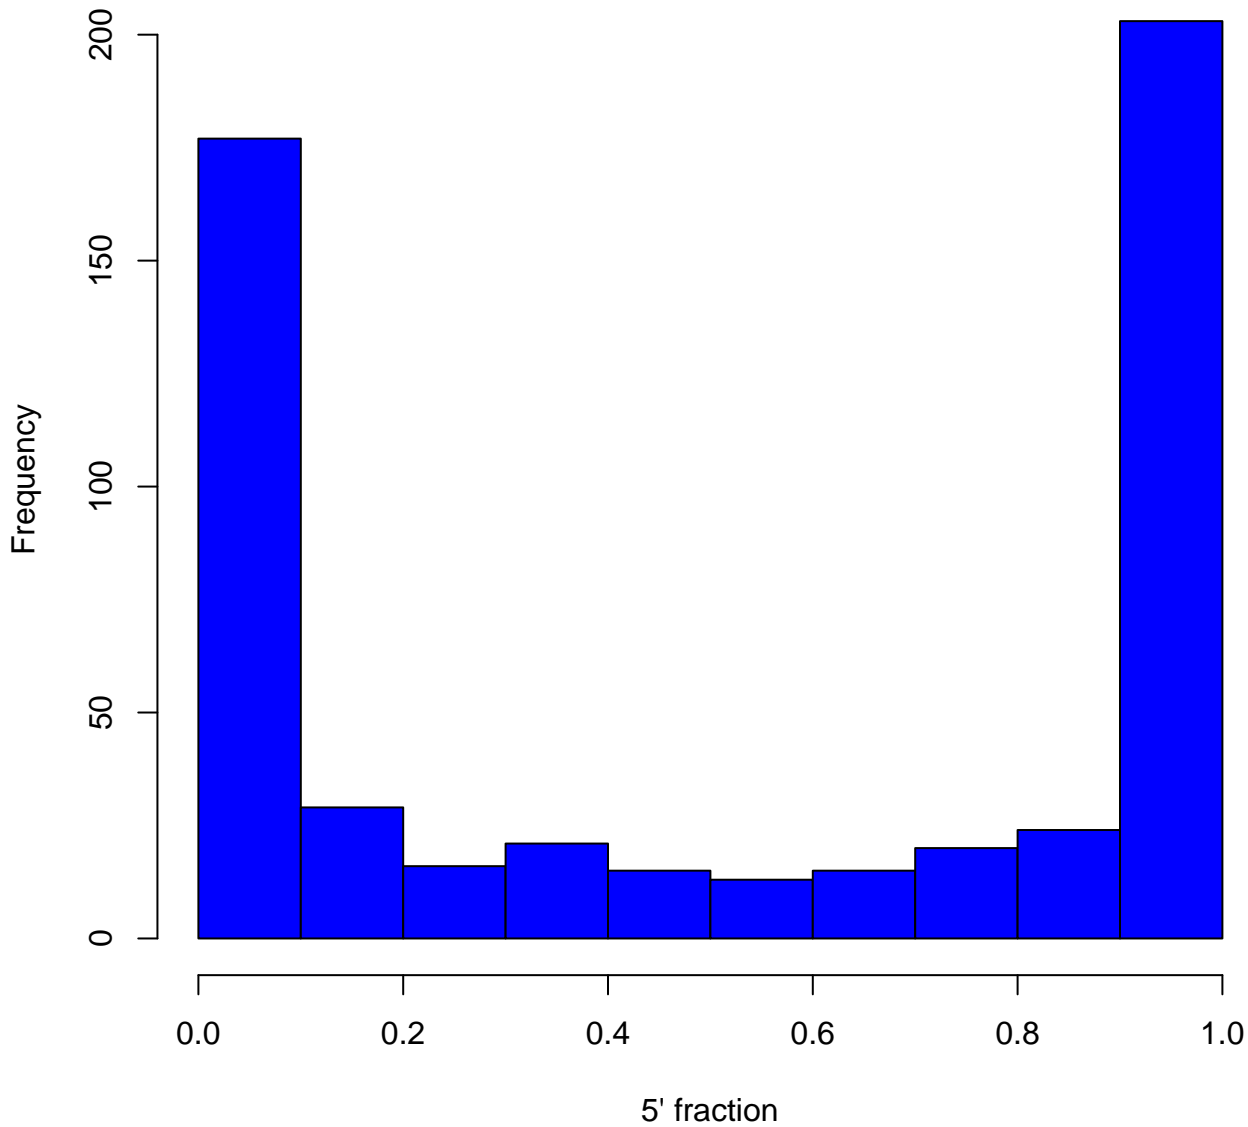

# Proportion of 5' reads – Heart

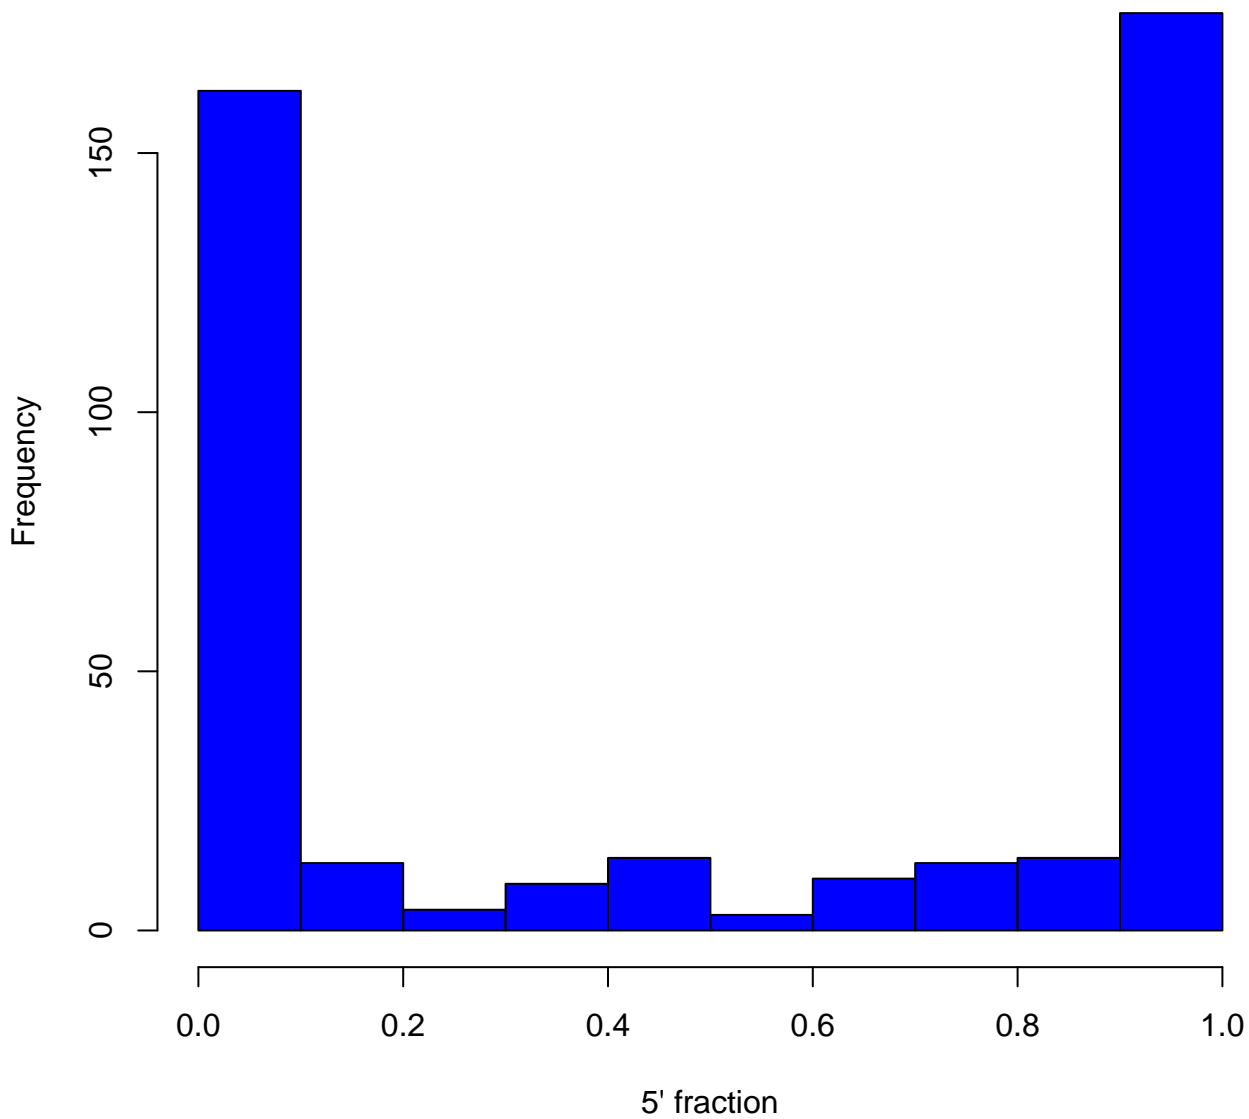

# Proportion of 5' reads – Kidney

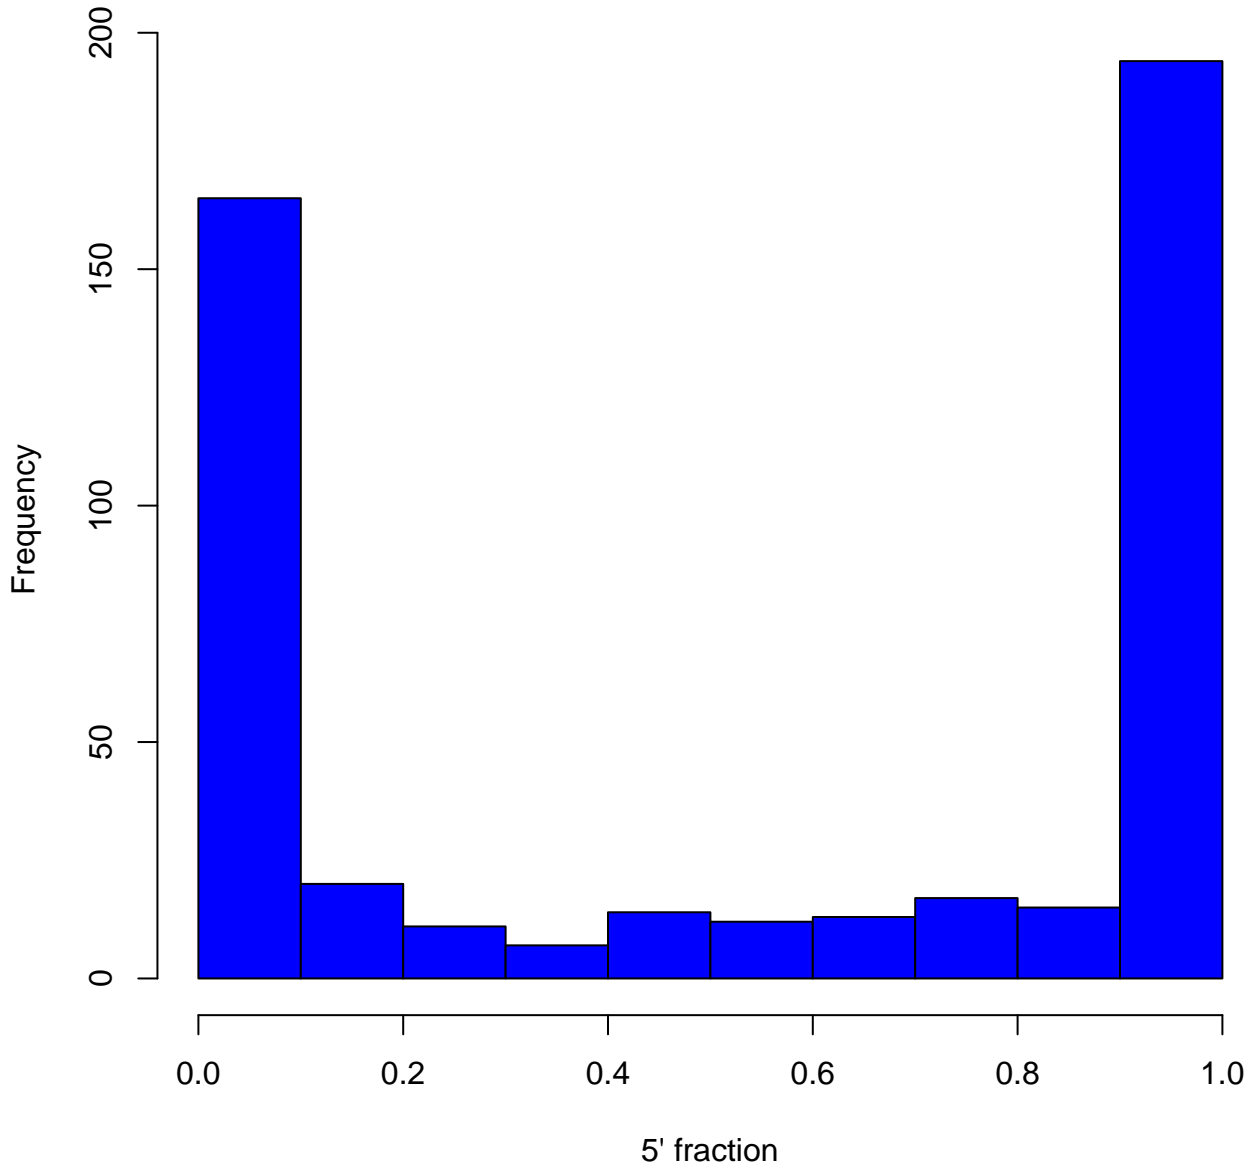

# Proportion of 5' reads – Lung

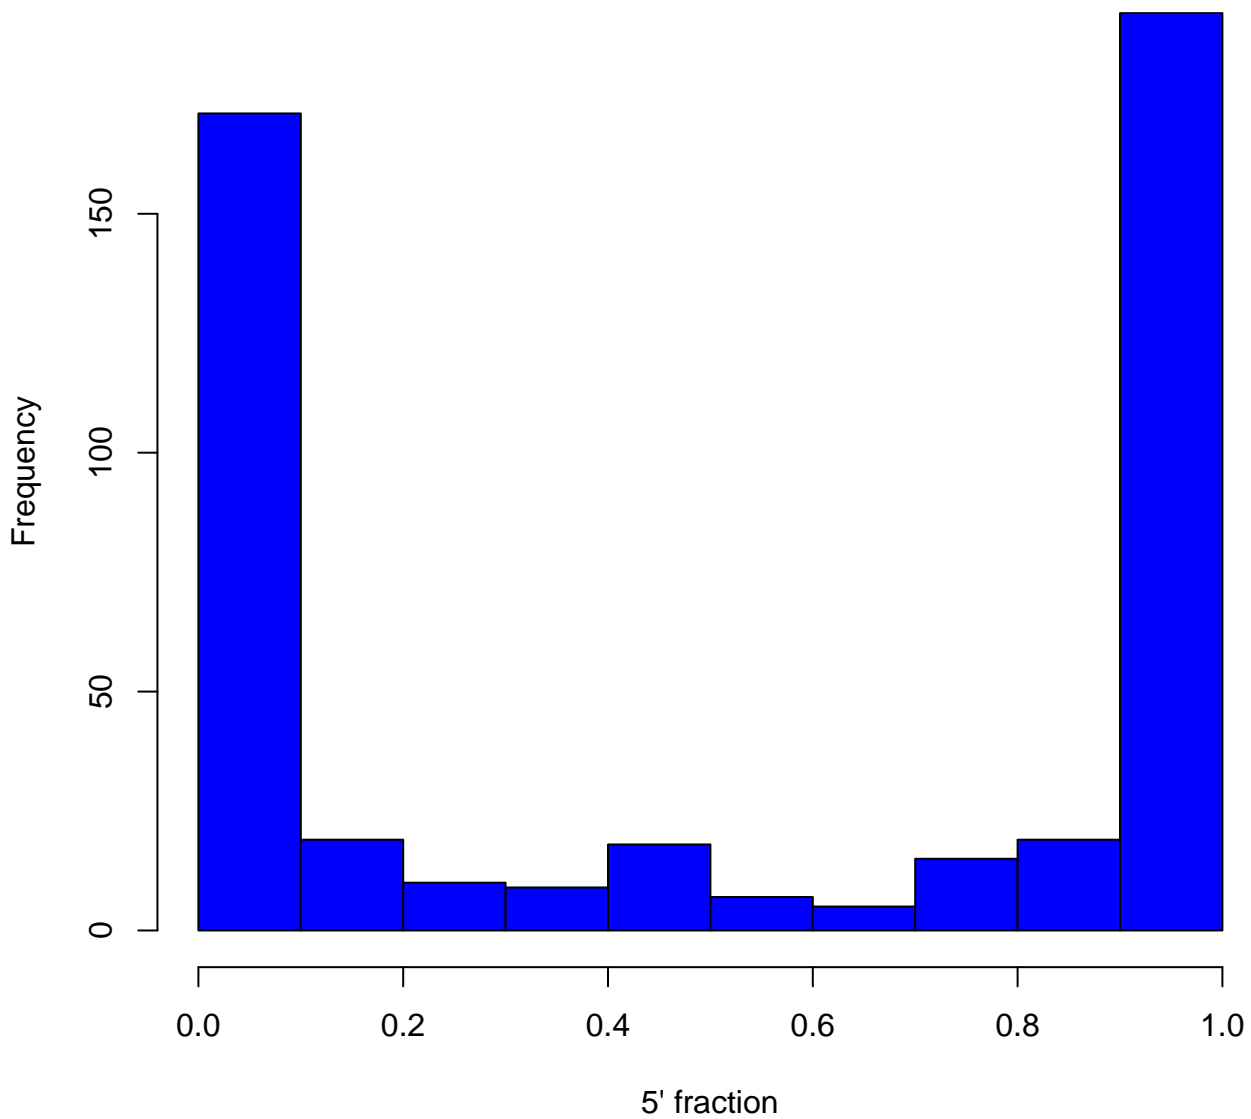

# Proportion of 5' reads – Ovary

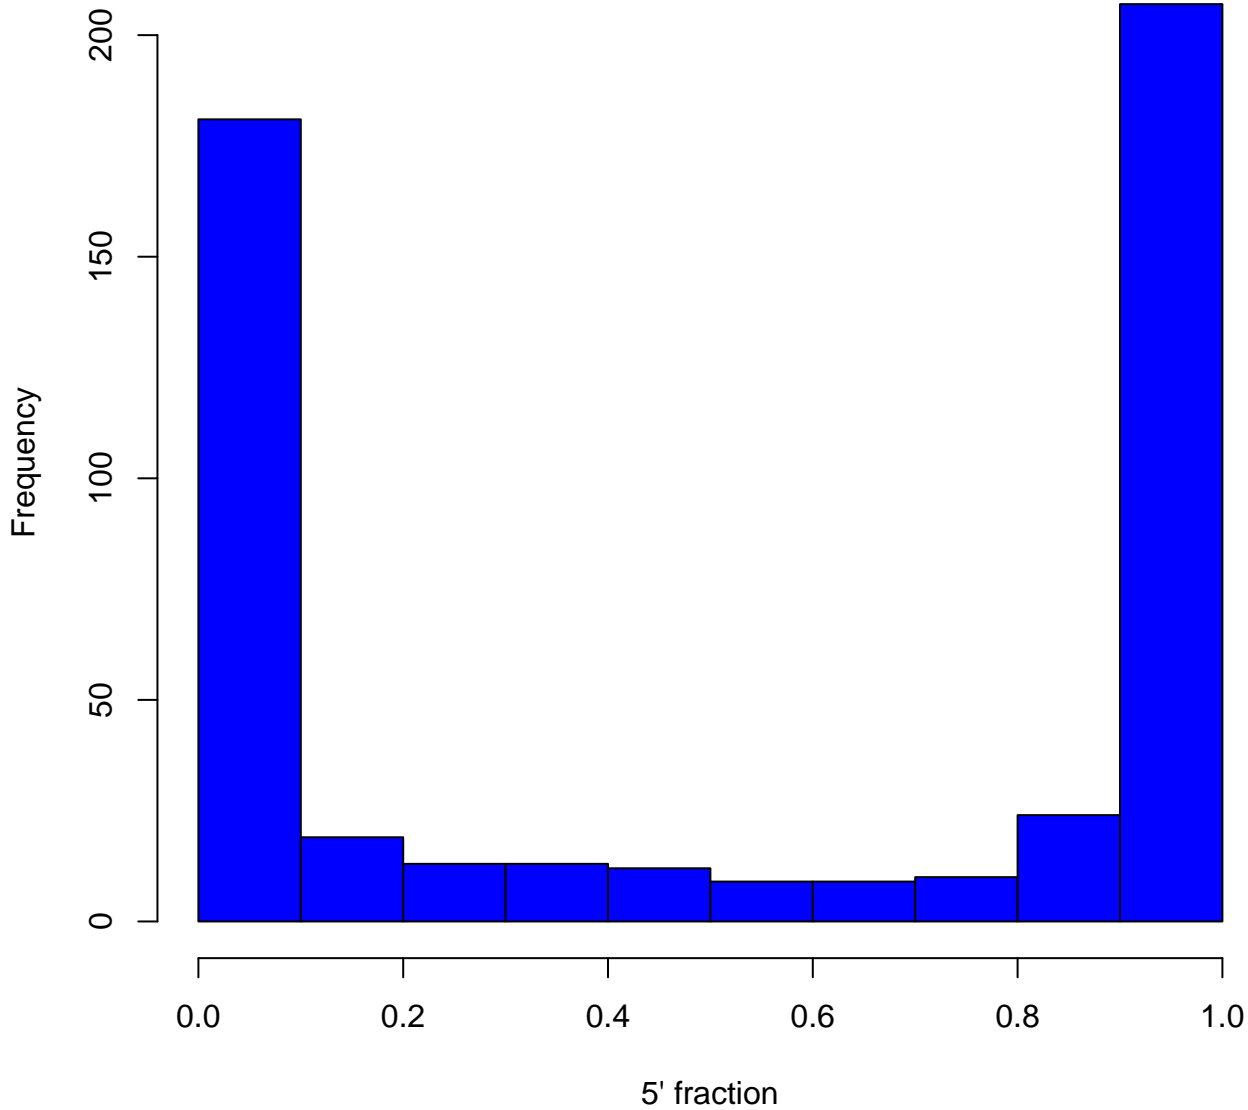

# Proportion of 5' reads – Skin

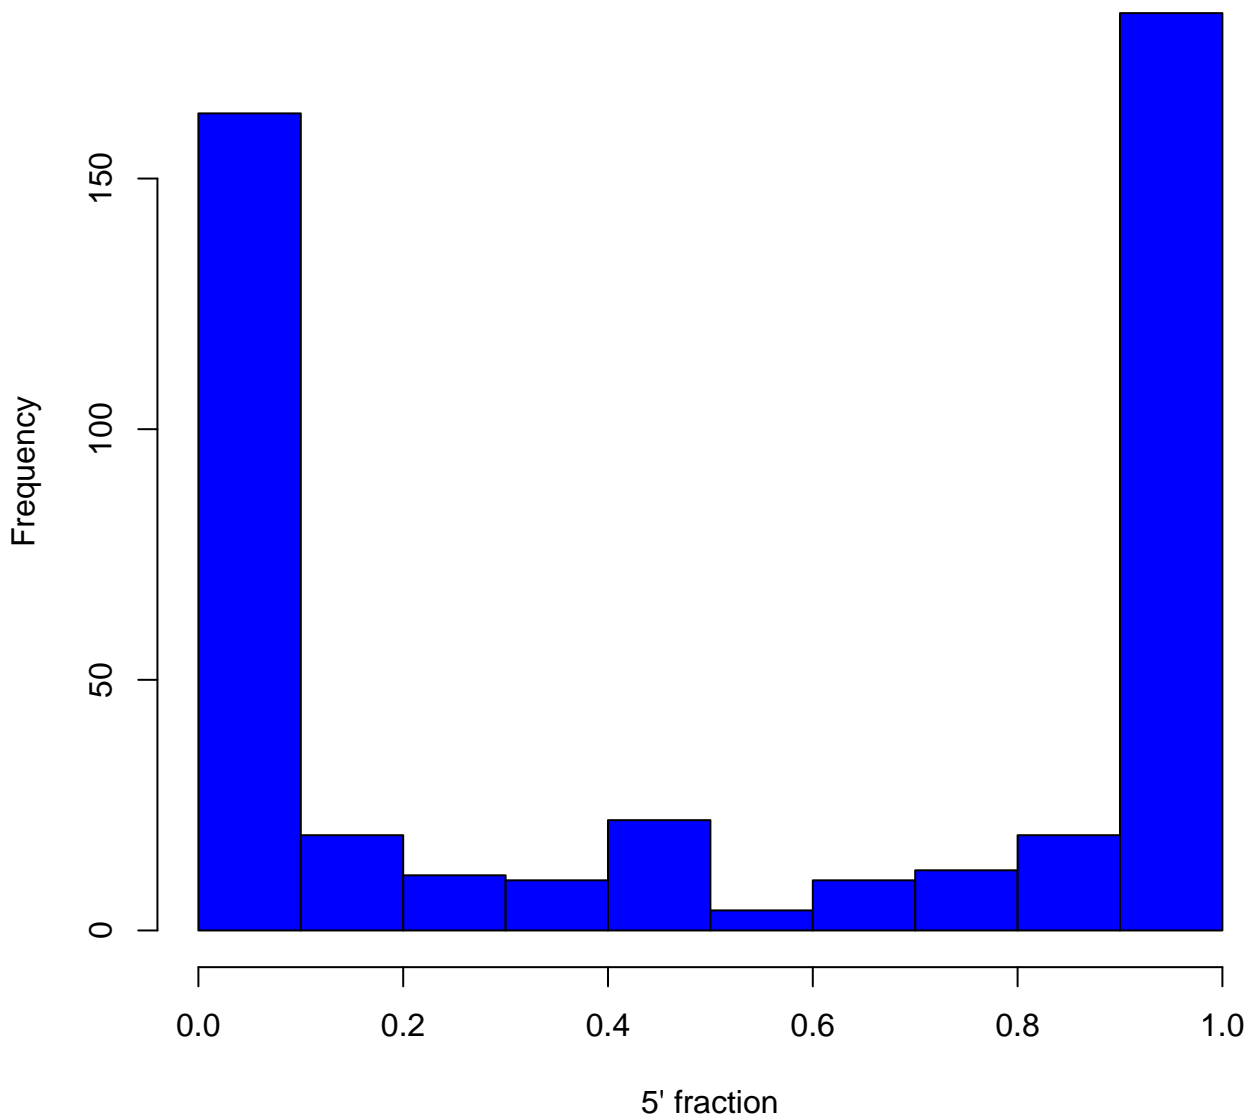

# Proportion of 5' reads – Smuscle

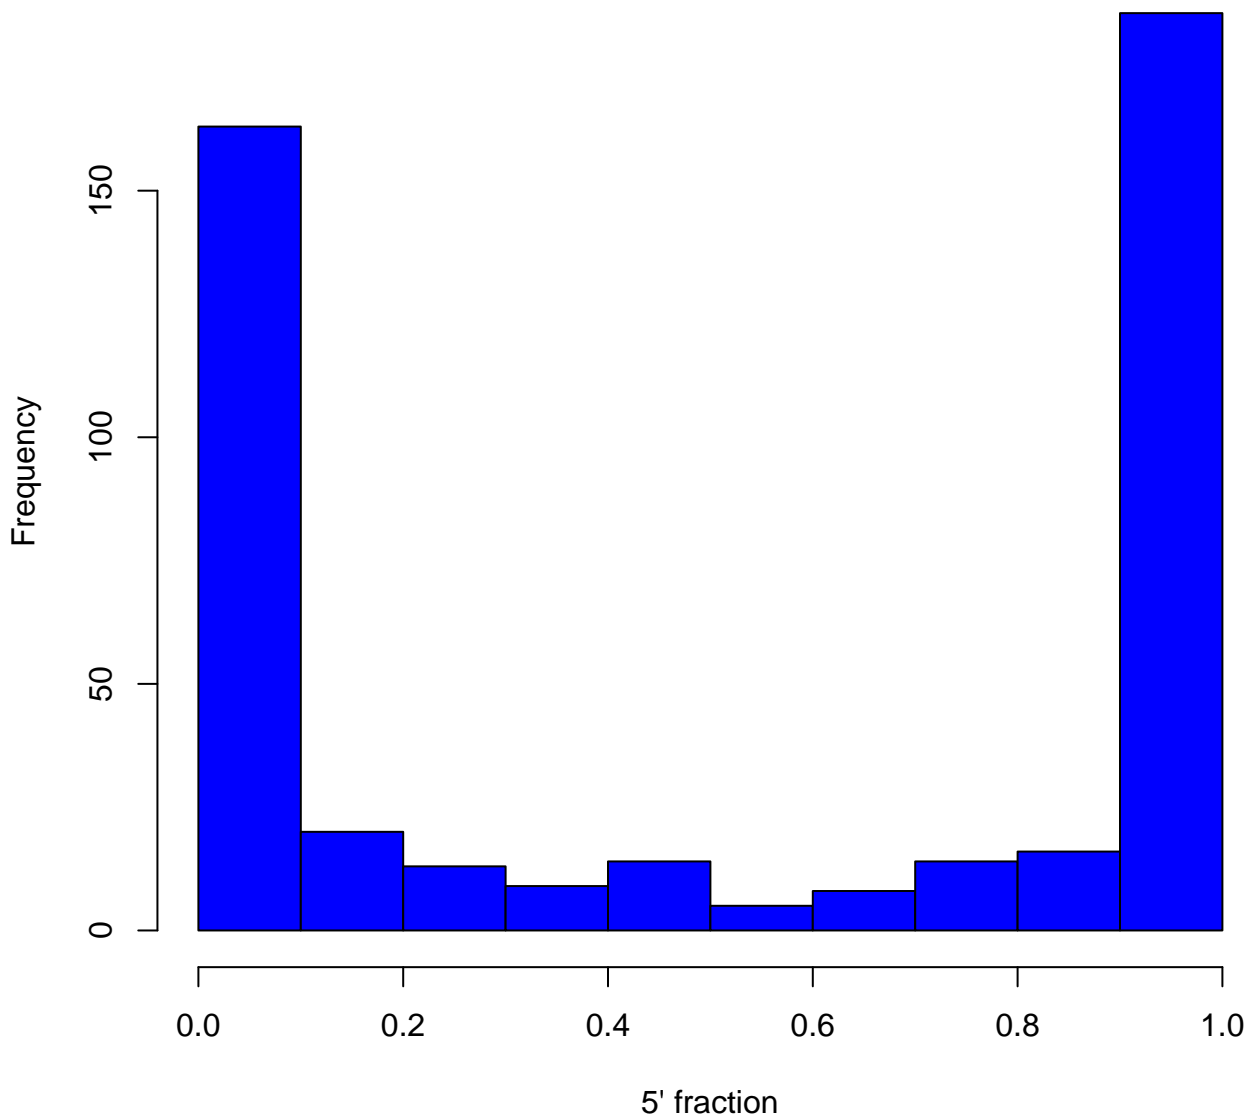



# Proportion of 5' reads – Testis

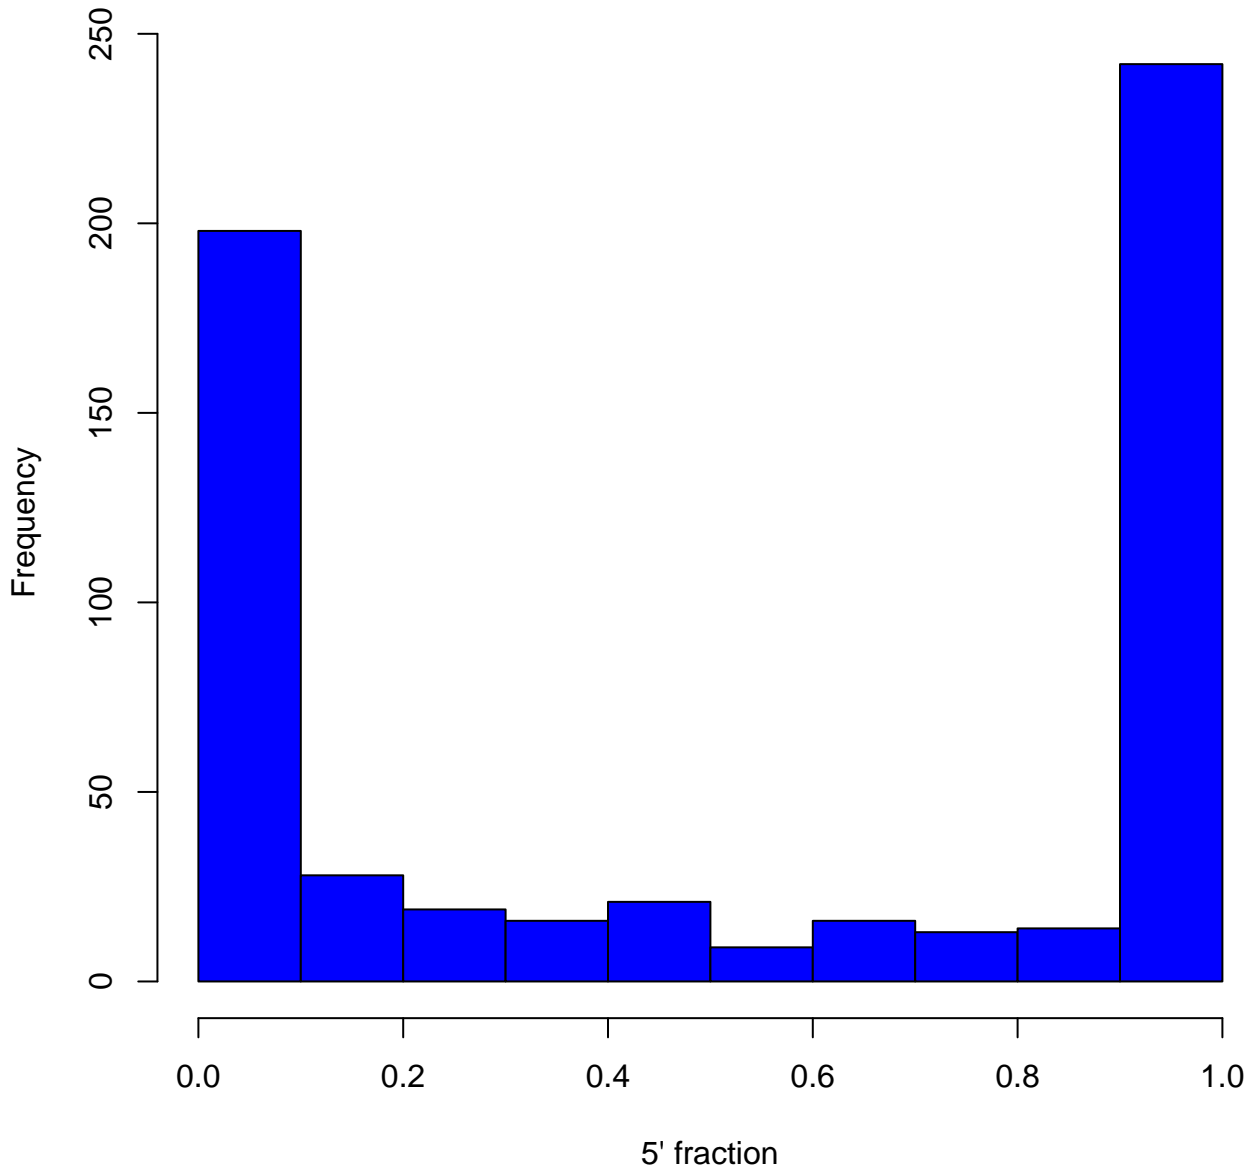

Supplement: pone.0153453.s009.pdf [file pone.0153453.s009.pdf]
